# Supplementary material for: Molybdenum-catalyzed carbonyl–carbonyl olefination reaction for heterocycle syntheses
Source: Royal Society of Chemistry journal article supplement (doi:10.1039/d3qo00567d), 2023-01-01

## Supplementary Information

### Molybdenum-catalyzed carbonyl-carbonyl olefination reaction for heterocycle syntheses

Yuan-Qing Dong,<sup>†a</sup> Xiao-Nan Shi,<sup>†a</sup> Li-Ya Cao,<sup>†a</sup> Jin Bai,<sup>a</sup> and Chun-Xiang Zhuo<sup>\*a,b</sup>

<sup>a</sup>State Key Laboratory of Physical Chemistry of Solid Surfaces, Key Laboratory of Chemical Biology of Fujian Province, and College of Chemistry and Chemical Engineering, Xiamen University, Xiamen 361005, P. R. China

<sup>b</sup>Shenzhen Research Institute of Xiamen University, Shenzhen 518057, P. R. China

*\*Email: cxzhuo@xmu.edu.cn*

#### Table of Contents

|      |                                                                         |      |
|------|-------------------------------------------------------------------------|------|
| I.   | Experimental details and characterization data                          | S-2  |
| II.  | Investigation of other quinones and transition-metal carbonyl complexes | S-42 |
| III. | Mechanistic studies                                                     | S-43 |
| IV.  | A proposed reaction pathway for the formation of coumarins              | S-45 |
| V.   | References                                                              | S-47 |
| VI.  | Copies of NMR spectra                                                   | S-52 |

## I. Experimental details and characterization data.

**General information.** Unless stated otherwise, all reactions were carried out in oven-dried (oven temperature  $\geq 110$  °C) glassware using anhydrous solvents under argon or N<sub>2</sub> atmosphere. The solvents were purified by distillation over the following drying agents and were transferred under argon or N<sub>2</sub> atmosphere: THF, toluene (Na); anhydrous 1,3,5-trimethylbenzene (mesitylene), CH<sub>2</sub>Cl<sub>2</sub> and DMF were purchased from Energy Chemical and kept in a sealed bottle containing 4 Å molecular sieve under argon. General-Reagent silica gel (300-400 mesh) was used for the flash column chromatography. Unless stated otherwise, all commercially available compounds (Energy Chemical, Bidepharmatech, TCI, J&K Chemical, and Strem Chemicals) were used as received. The substituted anilines **S1** were synthesized according to a reported procedure.<sup>[1]</sup>

NMR spectra were recorded on Bruker AV-400 MHz, Quantum-IPlus 400 MHz or Bruker AV-500 MHz spectrometers in the solvents indicated; chemical shifts ( $\delta$ ) are given in ppm, coupling constants ( $J$ ) in Hz. The solvent signals were used as references (CDCl<sub>3</sub>:  $\delta_C$  = 77.0 ppm; residual CHCl<sub>3</sub> in CDCl<sub>3</sub>:  $\delta_H$  = 7.26 ppm; C<sub>3</sub>D<sub>6</sub>O:  $\delta_C$  = 206.26, 29.84 ppm; residual C<sub>3</sub>D<sub>5</sub>HO:  $\delta_H$  = 2.05 ppm; dimethyl sulfoxide-D<sub>6</sub>:  $\delta_C$  = 39.52 ppm; residual dimethyl sulfoxide-D<sub>5</sub>H:  $\delta_H$  = 2.50 ppm). Infrared (IR) spectra were measured on a Nicolet AVATER FTIR330 spectrometer. High-resolution mass spectra (ESI) were recorded on a Micromass QTOF2 Quadruple/Time-of-Flight Tandem mass spectrometer.

## 1. Representative procedure for the syntheses of substrates **1** (RP1).<sup>[2]</sup>

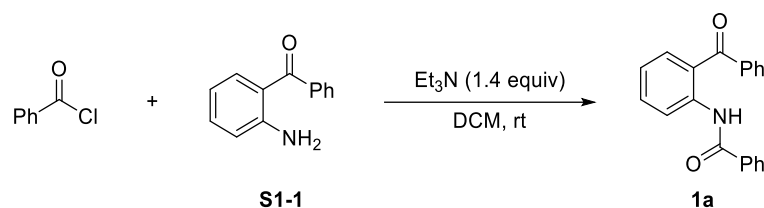

**Preparation of compound 1a.** Benzoyl chloride (984.0 mg, 0.81 mL, 7.0 mmol, 1.4 equiv) was added dropwise to a stirred solution of 2-aminophenyl-(phenyl)methanone **S1-1** (986.0 mg, 5.0 mmol, 1.0 equiv) and Et<sub>3</sub>N (708.3 mg, 0.97 mL, 7.0 mmol, 1.4 equiv) in CH<sub>2</sub>Cl<sub>2</sub> (15 mL) at room temperature. Stirring was continued at this temperature until the reaction was complete (monitored by TLC). The reaction mixture was quenched with H<sub>2</sub>O, and extracted with DCM (20 mL × 3). The combined organic layers were washed with saturated aqueous sodium bicarbonate and brine, dried over Na<sub>2</sub>SO<sub>4</sub>, filtered, and concentrated under reduced pressure. Purification by flash column chromatography on silica gel (petroleum ether/ethyl acetate = 10:1) gave **1a**<sup>[3]</sup> as a white solid (1.35 g, 90%). <sup>1</sup>H NMR (400 MHz, CDCl<sub>3</sub>): δ = 11.98 (s, 1H), 8.91 (d, *J* = 8.2 Hz, 1H), 8.10 – 8.05 (m, 2H), 7.74 – 7.69 (m, 2H), 7.65 – 7.45 (m, 8H), 7.15 – 7.08 (m, 1H). <sup>13</sup>C NMR (100 MHz, CDCl<sub>3</sub>): δ = 200.2, 165.7, 141.0, 138.7, 134.54, 134.45, 133.9, 132.3, 131.9, 129.7, 128.7, 128.2, 127.3, 123.0, 122.1, 121.3. IR (thin film): ν<sub>max</sub> (cm<sup>-1</sup>) = 3285, 3062, 1682, 1615, 1582, 1449, 1267, 941, 700, 643; HRMS (ESI) calcd for C<sub>20</sub>H<sub>15</sub>NNaO<sub>2</sub> [M+Na]<sup>+</sup>: 324.1000. Found: 324.0990.

The following substrates **1b–1z** & **1ak–1an** were prepared analogously.

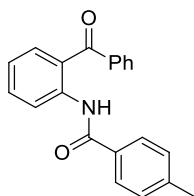

**1b.**<sup>[3]</sup> White solid, 1.43 g, 91% yield. <sup>1</sup>H NMR (400 MHz, CDCl<sub>3</sub>): δ = 11.94 (s, 1H), 8.91 (d, *J* = 8.1 Hz, 1H), 8.00 – 7.95 (m, 2H), 7.74 – 7.70 (m, 2H), 7.66 – 7.57 (m, 3H), 7.52 – 7.47 (m, 2H), 7.33 – 7.29 (m, 2H), 7.15 – 7.08 (m, 1H), 2.42 (s, 3H). <sup>13</sup>C NMR (100 MHz, CDCl<sub>3</sub>): δ = 200.3, 165.8, 142.5, 141.3, 138.8, 134.6, 134.0, 132.3, 131.7, 129.7, 129.4, 128.3, 127.4, 123.0, 121.9, 121.3, 21.5. IR (thin film): ν<sub>max</sub> (cm<sup>-1</sup>) = 3305, 2919, 1679, 1529, 1447, 1267, 752, 700, 642; HRMS (ESI) calcd for C<sub>21</sub>H<sub>17</sub>NNaO<sub>2</sub> [M+Na]<sup>+</sup>: 338.1152. Found: 338.1152.

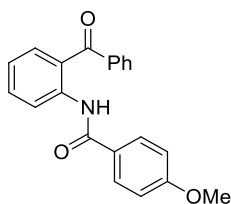

**1c.**<sup>[3]</sup> White solid, 1.65 g, 94% yield. <sup>1</sup>H NMR (400 MHz, CDCl<sub>3</sub>): δ = 11.92 (s, 1H), 8.89 (d, *J* = 8.3 Hz, 1H), 8.04 (d, *J* = 8.7 Hz, 2H), 7.70 (d, *J* = 7.4 Hz, 2H), 7.64 – 7.54 (m, 3H), 7.47 (t, *J* = 7.5 Hz, 2H), 7.08 (t, *J* = 7.5 Hz, 1H), 6.98 (d, *J* = 8.7 Hz, 2H), 3.84 (s, 3H). <sup>13</sup>C NMR (100 MHz, CDCl<sub>3</sub>): δ = 200.2, 165.2, 162.5, 141.3, 138.7, 134.5, 134.0, 132.2, 129.7, 129.2, 128.2, 126.7, 122.8, 121.7, 121.2, 113.9, 55.3. IR (thin film): ν<sub>max</sub> (cm<sup>-1</sup>) = 3307, 2918, 1677, 1507, 1255, 1175, 700, 643; HRMS (ESI) calcd for C<sub>21</sub>H<sub>17</sub>NNaO<sub>3</sub> [M+Na]<sup>+</sup>: 354.1101. Found: 354.1100.

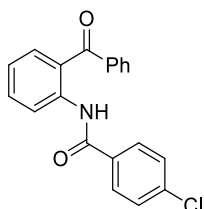

**1d.**<sup>[3]</sup> White solid, 1.61 g, 96% yield. <sup>1</sup>H NMR (400 MHz, CDCl<sub>3</sub>): δ = 12.01 (s, 1H), 8.87 (dd, *J* = 8.8, 1.1 Hz, 1H), 8.03 – 7.97 (m, 2H), 7.73 – 7.69 (m, 2H), 7.67 – 7.57 (m, 3H), 7.52 – 7.45 (m, 4H), 7.13 (td, *J* = 7.8, 1.1 Hz, 1H). <sup>13</sup>C NMR (100 MHz, CDCl<sub>3</sub>): δ = 200.4, 164.6, 141.0, 138.6, 138.3, 134.7, 134.1, 132.9, 132.4, 129.8, 129.0, 128.8, 128.3, 122.9, 122.3, 121.3. IR (thin film): ν<sub>max</sub> (cm<sup>-1</sup>) = 3284, 1683, 1584, 1267, 1111, 753, 710, 643; HRMS (ESI) calcd for C<sub>20</sub>H<sub>14</sub>ClNNaO<sub>2</sub> [M+Na]<sup>+</sup>: 358.0605. Found: 358.0610.

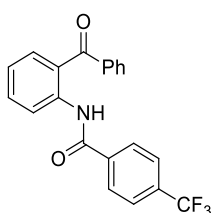

**1e.** Yellow solid, 1.39 g, 94% yield, mp 81.1-81.5 °C. <sup>1</sup>H NMR (400 MHz, CDCl<sub>3</sub>): δ = 12.11 (s, 1H), 8.88 (d, *J* = 8.6 Hz, 1H), 8.17 (d, *J* = 8.0 Hz, 2H), 7.76 (d, *J* = 8.1 Hz, 2H), 7.71 (d, *J* = 7.4 Hz, 2H), 7.67 – 7.58 (m, 3H), 7.49 (t, *J* = 7.5 Hz, 2H), 7.15 (t, *J* = 7.5 Hz, 1H). <sup>13</sup>C NMR (100 MHz, CDCl<sub>3</sub>): δ = 200.4, 164.3, 140.7, 138.5, 137.8, 134.7, 134.1, 133.5 (q, *J* = 32.6 Hz), 132.5, 129.8, 128.3, 127.8, 125.8 (q, *J* = 3.7 Hz), 123.6 (q, *J* = 271.0 Hz), 123.0, 122.5, 121.3. <sup>19</sup>F NMR (376



MHz, CDCl<sub>3</sub>):  $\delta$  = -62.99. IR (thin film):  $\nu_{\max}$  (cm<sup>-1</sup>) = 3278, 1686, 1604, 1531, 1327, 1296, 1128, 941, 768, 643; HRMS (ESI) calcd for C<sub>21</sub>H<sub>14</sub>F<sub>3</sub>NNaO<sub>2</sub> [M+Na]<sup>+</sup>: 392.0869. Found: 392.0874.

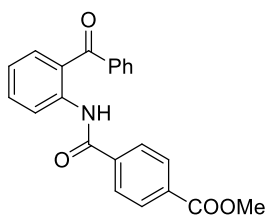

**1f.** Yellow solid, 1.66 g, 92% yield, mp 143.4-143.6 °C. <sup>1</sup>H NMR (400 MHz, CDCl<sub>3</sub>):  $\delta$  = 12.05 (s, 1H), 8.86 (dd, *J* = 8.8, 0.8 Hz, 1H), 8.20 – 8.08 (m, 4H), 7.74 – 7.68 (m, 2H), 7.66 – 7.55 (m, 3H), 7.49 – 7.45 (m, 2H), 7.15 – 7.10 (m, 1H), 3.92 (s, 3H). <sup>13</sup>C NMR (100 MHz, CDCl<sub>3</sub>):  $\delta$  = 200.2, 166.1, 164.7, 140.7, 138.5, 138.3, 134.6, 134.0, 133.0, 132.4, 129.9, 129.7, 128.3, 127.3, 123.0, 122.4, 121.3, 52.3. IR (thin film):  $\nu_{\max}$  (cm<sup>-1</sup>) = 3288, 2920, 1725, 1603, 1529, 1268, 1108, 723, 704, 643; HRMS (ESI) calcd for C<sub>22</sub>H<sub>17</sub>NNaO<sub>4</sub> [M+Na]<sup>+</sup>: 382.1050. Found: 382.1052.

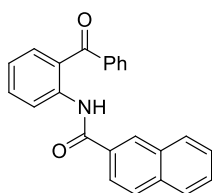

**1g.**<sup>[3]</sup> White solid, 1.35 g, 96% yield. <sup>1</sup>H NMR (400 MHz, CDCl<sub>3</sub>):  $\delta$  = 12.15 (s, 1H), 8.96 (d, *J* = 8.1 Hz, 1H), 8.61 (d, *J* = 1.3 Hz, 1H), 8.13 (dd, *J* = 8.6, 1.9 Hz, 1H), 8.06 – 8.02 (m, 1H), 7.97 (d, *J* = 8.6 Hz, 1H), 7.91 – 7.87 (m, 1H), 7.77 – 7.73 (m, 2H), 7.70 – 7.62 (m, 2H), 7.62 – 7.55 (m, 3H), 7.53 – 7.48 (m, 2H), 7.17 – 7.12 (m, 1H). <sup>13</sup>C NMR (100 MHz, CDCl<sub>3</sub>):  $\delta$  = 200.3, 165.9, 141.2, 138.8, 135.0, 134.6, 134.1, 132.7, 132.4, 131.8, 129.8, 129.4, 128.7, 128.4, 128.3, 127.9, 127.7, 126.7, 123.6, 123.1, 122.2, 121.5. IR (thin film):  $\nu_{\max}$  (cm<sup>-1</sup>) = 3059, 2921, 1679, 1598, 1526, 1448, 1259, 1198, 773, 700; HRMS (ESI) calcd for C<sub>24</sub>H<sub>17</sub>NNaO<sub>2</sub> [M+Na]<sup>+</sup>: 374.1152. Found: 374.1151.

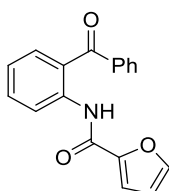

**1h.** White solid, 1.27 g, 87% yield, mp 116.2-116.8 °C. <sup>1</sup>H NMR (400 MHz, CDCl<sub>3</sub>):  $\delta$  = 11.87 (s, 1H), 8.82 (dd, *J* = 8.9, 0.9 Hz, 1H), 7.76 – 7.72 (m, 2H), 7.65 – 7.57 (m, 4H), 7.53 – 7.47 (m, 2H), 7.29 – 7.27 (m, 1H), 7.16 – 7.10 (m, 1H), 6.57 – 6.54 (m, 1H). <sup>13</sup>C NMR (100 MHz, CDCl<sub>3</sub>):

$\delta$  = 199.6, 156.6, 147.9, 144.8, 140.2, 138.5, 134.2, 133.7, 132.3, 129.7, 128.2, 123.2, 122.1, 121.3, 115.3, 112.2. IR (thin film):  $\nu_{\max}$  (cm<sup>-1</sup>) = 3298, 2918, 1682, 1637, 1525, 1449, 1274, 923, 753, 713, 643; HRMS (ESI) calcd for C<sub>18</sub>H<sub>13</sub>NNaO<sub>3</sub> [M+Na]<sup>+</sup>: 314.0788. Found: 314.0785.

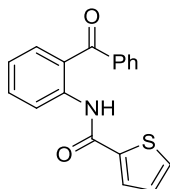

**1i.** Yellow solid, 1.40 g, 91% yield, mp 141.9-143.0 °C. <sup>1</sup>H NMR (400 MHz, CDCl<sub>3</sub>):  $\delta$  = 11.99 (s, 1H), 8.80 (d, *J* = 8.5 Hz, 1H), 7.80 (d, *J* = 3.4 Hz, 1H), 7.68 (d, *J* = 7.3 Hz, 2H), 7.61 – 7.51 (m, 4H), 7.46 (t, *J* = 7.6 Hz, 2H), 7.13 – 7.05 (m, 2H). <sup>13</sup>C NMR (100 MHz, CDCl<sub>3</sub>):  $\delta$  = 200.1, 160.2, 140.8, 139.8, 138.5, 134.5, 133.9, 132.2, 131.2, 129.6, 128.6, 128.1, 127.8, 122.4, 121.9, 120.9. IR (thin film):  $\nu_{\max}$  (cm<sup>-1</sup>) = 3298, 2918, 1670, 1603, 1530, 1447, 1269, 939, 752, 711, 642; HRMS (ESI) calcd for C<sub>18</sub>H<sub>13</sub>NNaO<sub>2</sub>S [M+Na]<sup>+</sup>: 330.0559. Found: 330.0560.

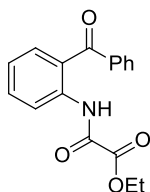

**1j.** White solid, 1.32 g, 89% yield, mp 124.6-125.6 °C. <sup>1</sup>H NMR (400 MHz, CDCl<sub>3</sub>):  $\delta$  = 12.23 (s, 1H), 8.71 – 8.66 (m, 1H), 7.74 – 7.68 (m, 2H), 7.63 – 7.55 (m, 3H), 7.50 – 7.44 (m, 2H), 7.18 (td, *J* = 7.8, 1.1 Hz, 1H), 4.42 (q, *J* = 7.1 Hz, 2H), 1.42 (t, *J* = 7.1 Hz, 3H). <sup>13</sup>C NMR (100 MHz, CDCl<sub>3</sub>):  $\delta$  = 198.9, 160.2, 154.8, 138.5, 138.2, 134.2, 133.5, 132.6, 129.9, 128.2, 124.1, 123.5, 121.3, 63.5, 13.9. IR (thin film):  $\nu_{\max}$  (cm<sup>-1</sup>) = 3274, 2985, 1715, 1600, 1523, 1263, 1178, 946, 711, 643; HRMS (ESI) calcd for C<sub>17</sub>H<sub>15</sub>NNaO<sub>4</sub> [M+Na]<sup>+</sup>: 320.0893. Found: 320.0892.

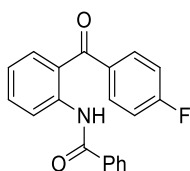

**1k.** White solid, 0.65 g, 81% yield, mp 117.5-118.6 °C. <sup>1</sup>H NMR (400 MHz, CDCl<sub>3</sub>):  $\delta$  = 11.80 (s, 1H), 8.87 (dd, *J* = 8.4, 0.9 Hz, 1H), 8.07 – 8.03 (m, 2H), 7.80 – 7.74 (m, 2H), 7.68 – 7.62 (m, 1H), 7.61 – 7.57 (m, 1H), 7.56 – 7.49 (m, 3H), 7.20 – 7.11 (m, 3H). <sup>13</sup>C NMR (100 MHz, CDCl<sub>3</sub>):  $\delta$  = 198.5, 165.7, 165.3 (d, *J* = 253.1 Hz), 140.9, 134.8 (d, *J* = 3.1 Hz), 134.6, 134.5, 133.5, 132.5 (d, *J* = 9.1 Hz), 132.0, 128.8, 127.3, 123.1, 122.2, 121.6, 115.5 (d, *J* = 21.8 Hz). <sup>19</sup>F NMR (376

MHz, CDCl<sub>3</sub>):  $\delta$  = -105.5. IR (thin film):  $\nu_{\max}$  (cm<sup>-1</sup>) = 3305, 3066, 1682, 1598, 1449, 1267, 1156, 933, 759, 703; HRMS (ESI) calcd for C<sub>20</sub>H<sub>14</sub>FNNaO<sub>2</sub> [M+Na]<sup>+</sup>: 342.0901. Found: 342.0899.

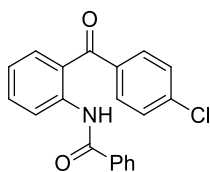

**1l.**<sup>[4]</sup> White solid, 0.78 g, 93% yield. <sup>1</sup>H NMR (400 MHz, CDCl<sub>3</sub>):  $\delta$  = 11.85 (s, 1H), 8.89 (d, *J* = 8.4 Hz, 1H), 8.08 – 8.03 (m, 2H), 7.70 – 7.63 (m, 3H), 7.60 – 7.45 (m, 6H), 7.17 – 7.10 (m, 1H). <sup>13</sup>C NMR (100 MHz, CDCl<sub>3</sub>):  $\delta$  = 198.8, 165.8, 141.1, 138.9, 137.0, 134.8, 134.5, 133.6, 132.1, 131.2, 128.8, 128.7, 127.4, 122.9, 122.2, 121.6. IR (thin film):  $\nu_{\max}$  (cm<sup>-1</sup>) = 3301, 2918, 1682, 1604, 1528, 1448, 1294, 932, 758, 702; HRMS (ESI) calcd for C<sub>20</sub>H<sub>14</sub>ClNNaO<sub>2</sub> [M+Na]<sup>+</sup>: 358.0611. Found: 358.0608.

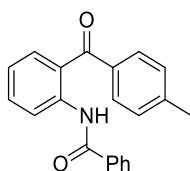

**1m.** White solid, 0.87 g, 92% yield, mp 88.0-89.0 °C. <sup>1</sup>H NMR (400 MHz, CDCl<sub>3</sub>):  $\delta$  = 11.90 (s, 1H), 8.88 (dd, *J* = 8.8, 1.0 Hz, 1H), 8.09 – 8.05 (m, 2H), 7.65 – 7.59 (m, 4H), 7.55 – 7.47 (m, 3H), 7.28 (d, *J* = 7.9 Hz, 2H), 7.11 (td, *J* = 7.9, 1.1 Hz, 1H), 2.43 (s, 3H). <sup>13</sup>C NMR (100 MHz, CDCl<sub>3</sub>):  $\delta$  = 199.8, 165.7, 143.3, 140.8, 135.9, 134.5, 134.2, 133.7, 131.9, 130.0, 128.9, 128.7, 127.3, 123.4, 122.0, 121.3, 21.5. IR (thin film):  $\nu_{\max}$  (cm<sup>-1</sup>) = 3280, 3063, 1682, 1582, 1495, 1268, 1183, 933, 782, 704; HRMS (ESI) calcd for C<sub>21</sub>H<sub>17</sub>NNaO<sub>2</sub> [M+Na]<sup>+</sup>: 338.1152. Found: 338.1150.

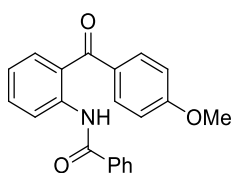

**1n.**<sup>[5]</sup> White solid, 0.82 g, 82% yield. <sup>1</sup>H NMR (400 MHz, CDCl<sub>3</sub>):  $\delta$  = 11.73 (s, 1H), 8.83 (dd, *J* = 8.8, 0.8 Hz, 1H), 8.07 – 8.01 (m, 2H), 7.73 (d, *J* = 8.6 Hz, 2H), 7.59 (t, *J* = 7.3 Hz, 2H), 7.54 – 7.44 (m, 3H), 7.11 (t, *J* = 7.6 Hz, 1H), 6.94 (d, *J* = 8.6 Hz, 2H), 3.83 (s, 3H). <sup>13</sup>C NMR (100 MHz, CDCl<sub>3</sub>):  $\delta$  = 198.3, 165.5, 163.2, 140.3, 134.4, 133.7, 133.2, 132.4, 131.8, 130.8, 128.6, 127.2, 123.8, 122.0, 121.4, 113.5, 55.3. IR (thin film):  $\nu_{\max}$  (cm<sup>-1</sup>) = 3319, 2917, 1678, 1598, 1581, 1257, 1176, 933, 760, 703; HRMS (ESI) calcd for C<sub>21</sub>H<sub>17</sub>NNaO<sub>3</sub> [M+Na]<sup>+</sup>: 354.1101. Found: 354.1099.

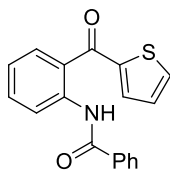

**1o.**<sup>[3]</sup> Yellow solid, 0.22 g, 70% yield. <sup>1</sup>H NMR (400 MHz, CDCl<sub>3</sub>): δ = 11.41 (s, 1H), 8.80 (d, *J* = 8.4 Hz, 1H), 8.05 – 8.00 (m, 2H), 7.88 (dd, *J* = 7.8, 1.1 Hz, 1H), 7.73 (d, *J* = 4.9 Hz, 1H), 7.67 – 7.58 (m, 2H), 7.56 – 7.46 (m, 3H), 7.22 – 7.10 (m, 2H). <sup>13</sup>C NMR (100 MHz, CDCl<sub>3</sub>): δ = 190.2, 165.5, 143.8, 139.8, 135.6, 134.7, 134.4, 133.9, 132.0, 131.9, 128.7, 128.0, 127.2, 124.1, 122.4, 121.7. IR (thin film): ν<sub>max</sub> (cm<sup>-1</sup>) = 3319, 1678, 1599, 1581, 1409, 1270, 758, 703, 651; HRMS (ESI) calcd for C<sub>18</sub>H<sub>13</sub>NNaO<sub>2</sub>S [M+Na]<sup>+</sup>: 330.0559. Found: 330.0565.

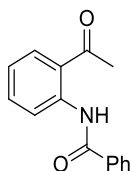

**1p.**<sup>[6]</sup> White solid, 1.09 g, 91% yield. <sup>1</sup>H NMR (400 MHz, CDCl<sub>3</sub>): δ = 12.70 (s, 1H), 8.98 (d, *J* = 8.5 Hz, 1H), 8.10 – 8.05 (m, 2H), 7.95 (dd, *J* = 8.0, 1.3 Hz, 1H), 7.65 – 7.59 (m, 1H), 7.57 – 7.49 (m, 3H), 7.18 – 7.13 (m, 1H), 2.71 (s, 3H). <sup>13</sup>C NMR (100 MHz, CDCl<sub>3</sub>): δ = 203.1, 165.9, 141.3, 135.2, 134.7, 131.8, 131.7, 128.7, 127.3, 122.3, 121.8, 120.6, 28.4.

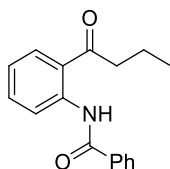

**1q.** Yellow solid, 0.32 g, 60% yield, mp 92.8-93.4 °C. <sup>1</sup>H NMR (400 MHz, CDCl<sub>3</sub>): δ = 12.74 (s, 1H), 8.97 (d, *J* = 8.5 Hz, 1H), 8.11 – 8.05 (m, 2H), 8.00 – 7.95 (m, 1H), 7.63 – 7.50 (m, 4H), 7.18 – 7.12 (m, 1H), 3.04 (t, *J* = 7.4 Hz, 2H), 1.85 – 1.74 (m, 2H), 1.03 (t, *J* = 7.4 Hz, 3H). <sup>13</sup>C NMR (100 MHz, CDCl<sub>3</sub>): δ = 205.3, 166.0, 141.3, 134.9, 134.8, 131.8, 130.9, 128.7, 127.4, 122.4, 121.8, 120.9, 41.9, 18.1, 13.8. IR (thin film): ν<sub>max</sub> (cm<sup>-1</sup>) = 2692, 1680, 1607, 1584, 1450, 1303, 753, 703; HRMS (ESI) calcd for C<sub>17</sub>H<sub>17</sub>NNaO<sub>2</sub> [M+Na]<sup>+</sup>: 290.1152. Found: 290.1156.

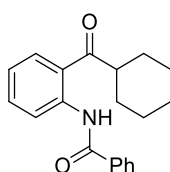

**1r.** Yellow solid, 1.09 g, 81% yield, mp 120.4-121.1 °C. <sup>1</sup>H NMR (400 MHz, CDCl<sub>3</sub>): δ = 12.74 (s, 1H), 8.97 (d, *J* = 8.4 Hz, 1H), 8.11 – 8.05 (m, 2H), 7.98 (d, *J* = 7.9 Hz, 1H), 7.62 – 7.48 (m, 4H), 7.16 (t, *J* = 7.6 Hz, 1H), 3.44 – 3.33 (m, 1H), 1.96 – 1.82 (m, 4H), 1.80 – 1.71 (m, 1H), 1.61 – 1.50 (m, 2H), 1.48 – 1.36 (m, 2H), 1.32 – 1.23 (m, 1H). <sup>13</sup>C NMR (100 MHz, CDCl<sub>3</sub>): δ = 208.8, 166.0, 141.7, 134.9, 134.8, 131.8, 130.6, 128.7, 127.4, 122.4, 121.2, 121.1, 46.7, 29.8, 25.8, 25.76. IR (thin film): ν<sub>max</sub> (cm<sup>-1</sup>) = 2962, 2854, 1679, 1583, 1526, 1450, 1306, 972, 753, 704; HRMS (ESI) calcd for C<sub>20</sub>H<sub>21</sub>NNaO<sub>2</sub> [M+Na]<sup>+</sup>: 330.1464. Found: 330.1472.

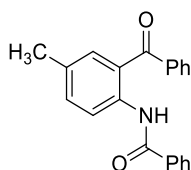

**1s.** White solid, 0.55 g, 44% yield, mp 115.0-117.0 °C. <sup>1</sup>H NMR (400 MHz, CDCl<sub>3</sub>): δ = 11.82 (s, 1H), 8.78 (d, *J* = 8.5 Hz, 1H), 8.08 – 8.04 (m, 2H), 7.74 – 7.70 (m, 2H), 7.62 – 7.57 (m, 1H), 7.55 – 7.43 (m, 6H), 7.42 – 7.39 (m, 1H), 2.32 (s, 3H). <sup>13</sup>C NMR (100 MHz, CDCl<sub>3</sub>): δ = 200.3, 165.6, 138.8, 138.6, 135.3, 134.6, 134.0, 132.3, 131.9, 131.7, 129.7, 128.7, 128.3, 127.3, 123.2, 121.4, 20.7. IR (thin film): ν<sub>max</sub> (cm<sup>-1</sup>) = 3291, 2922, 1679, 1590, 1522, 1297, 1270, 964, 701, 674; HRMS (ESI) calcd for C<sub>21</sub>H<sub>17</sub>NNaO<sub>2</sub> [M+Na]<sup>+</sup>: 338.1152. Found: 338.1149.

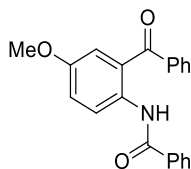

**1t.** Yellow solid, 0.28 g, 85% yield, mp 94.5-94.9 °C. <sup>1</sup>H NMR (400 MHz, CDCl<sub>3</sub>): δ = 11.53 (s, 1H), 8.78 (d, *J* = 9.1 Hz, 1H), 8.03 (d, *J* = 6.9 Hz, 2H), 7.75 (d, *J* = 7.4 Hz, 2H), 7.60 (t, *J* = 7.3 Hz, 1H), 7.54 – 7.46 (m, 5H), 7.23 – 7.10 (m, 2H), 3.76 (s, 3H). <sup>13</sup>C NMR (100 MHz, CDCl<sub>3</sub>): δ = 199.7, 165.5, 154.1, 138.4, 134.6, 134.2, 132.6, 131.8, 129.8, 128.7, 128.3, 127.2, 124.6, 123.1, 119.6, 118.8, 55.6. IR (thin film): ν<sub>max</sub> (cm<sup>-1</sup>) = 2923, 1675, 1593, 1522, 1284, 1217, 960, 701; HRMS (ESI) calcd for C<sub>21</sub>H<sub>17</sub>NNaO<sub>3</sub> [M+Na]<sup>+</sup>: 354.1101. Found: 354.1100.

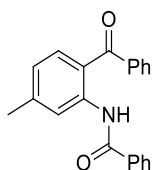

**1u.** White solid, 0.76 g, 80% yield, mp 134.5-135.7 °C. <sup>1</sup>H NMR (400 MHz, CDCl<sub>3</sub>): δ = 12.16 (s, 1H), 8.79 (d, *J* = 0.6 Hz, 1H), 8.12 – 8.05 (m, 2H), 7.71 – 7.67 (m, 2H), 7.61 – 7.46 (m, 7H), 6.95 – 6.90 (m, 1H), 2.48 (s, 3H). <sup>13</sup>C NMR (100 MHz, CDCl<sub>3</sub>): δ = 200.1, 165.8, 146.2, 141.4, 139.1, 134.6, 134.3, 132.1, 131.9, 129.6, 128.8, 128.2, 127.4, 123.0, 121.6, 120.5, 22.2. IR (thin film): ν<sub>max</sub> (cm<sup>-1</sup>) = 3280, 3061, 2926, 1682, 1599, 1530, 1293, 1270, 935, 798, 700; HRMS (ESI) calcd for C<sub>21</sub>H<sub>17</sub>NNaO<sub>2</sub> [M+Na]<sup>+</sup>: 338.1152. Found: 338.1158.

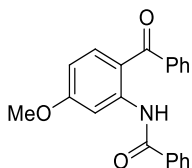

**1v.**<sup>[7]</sup> White solid, 0.40 g, 40% yield. <sup>1</sup>H NMR (400 MHz, CDCl<sub>3</sub>): δ = 12.68 (s, 1H), 8.66 (d, *J* = 2.5 Hz, 1H), 8.13 – 8.07 (m, 2H), 7.65 – 7.60 (m, 2H), 7.57 – 7.43 (m, 7H), 6.58 (dd, *J* = 8.9, 2.6 Hz, 1H), 3.91 (s, 3H). <sup>13</sup>C NMR (100 MHz, CDCl<sub>3</sub>): δ = 199.3, 166.0, 164.7, 144.3, 139.4, 136.4, 134.4, 131.9, 131.5, 129.1, 128.7, 128.1, 127.3, 115.4, 109.2, 104.5, 55.5.

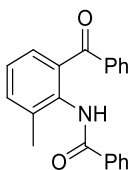

**1w.** White solid, 0.49 g, 86% yield, mp 85.3-86.3 °C. <sup>1</sup>H NMR (400 MHz, CDCl<sub>3</sub>): δ = 9.71 (s, 1H), 7.93 – 7.89 (m, 2H), 7.83 – 7.79 (m, 2H), 7.58 – 7.40 (m, 7H), 7.34 (dd, *J* = 7.6, 1.0 Hz, 1H), 7.23 (t, *J* = 7.6 Hz, 1H), 2.40 (s, 3H). <sup>13</sup>C NMR (100 MHz, CDCl<sub>3</sub>): δ = 198.1, 165.4, 137.6, 136.5, 135.8, 134.8, 134.1, 133.0, 132.4, 131.8, 130.4, 129.1, 128.6, 128.2, 127.4, 125.1, 19.2. IR (thin film): ν<sub>max</sub> (cm<sup>-1</sup>) = 3303, 1664, 1509, 1486, 1317, 778, 741, 706, 668; HRMS (ESI) calcd for C<sub>21</sub>H<sub>17</sub>NNaO<sub>2</sub> [M+Na]<sup>+</sup>: 338.1150. Found: 338.1147.

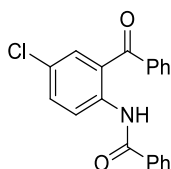

**1x.** Yellow solid, 0.61 g, 60% yield, mp 119.0-121.1 °C. <sup>1</sup>H NMR (400 MHz, CDCl<sub>3</sub>): δ = 11.78 (s, 1H), 8.88 (d, *J* = 9.7 Hz, 1H), 8.07 – 8.01 (m, 2H), 7.75 – 7.70 (m, 2H), 7.64 – 7.47 (m, 8H). <sup>13</sup>C NMR (100 MHz, CDCl<sub>3</sub>): δ = 199.0, 165.7, 139.5, 138.0, 134.2, 134.1, 133.0, 132.8, 132.2, 129.8, 128.8, 128.5, 127.3, 127.2, 124.3, 122.9. IR (thin film): ν<sub>max</sub> (cm<sup>-1</sup>) = 3303, 3062, 1684,

1637, 1512, 1396, 1288, 1244, 951, 700; HRMS (ESI) calcd for  $C_{20}H_{14}ClNNaO_2$   $[M+Na]^+$ : 358.0605. Found: 358.0610.

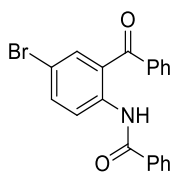

**1y.** Yellow solid, 1.06 g, 70% yield, mp 117.4-118.3 °C.  $^1H$  NMR (400 MHz,  $CDCl_3$ ):  $\delta$  = 11.78 (s, 1H), 8.84 – 8.80 (m, 1H), 8.06 – 8.01 (m, 2H), 7.76 – 7.70 (m, 4H), 7.66 – 7.61 (m, 1H), 7.57 – 7.48 (m, 5H).  $^{13}C$  NMR (100 MHz,  $CDCl_3$ ):  $\delta$  = 198.9, 165.7, 140.0, 138.0, 137.1, 135.9, 134.2, 132.9, 132.2, 129.8, 128.8, 128.5, 127.3, 124.7, 123.2, 114.6. IR (thin film):  $\nu_{max}$  ( $cm^{-1}$ ) = 3299, 2917, 2926, 1683, 1577, 1511, 1492, 1287, 1259, 948, 833, 699; HRMS (ESI) calcd for  $C_{20}H_{14}BrNNaO_2$   $[M+Na]^+$ : 404.0080. Found: 404.0083.

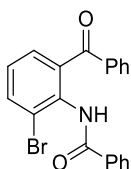

**1z.** White solid, 0.28 g, 73% yield, mp 158.0-160.1 °C.  $^1H$  NMR (400 MHz,  $CDCl_3$ ):  $\delta$  = 8.71 (s, 1H), 7.88 (d,  $J$  = 7.3 Hz, 2H), 7.81 (d,  $J$  = 7.3 Hz, 2H), 7.74 (dd,  $J$  = 8.0, 1.1 Hz, 1H), 7.55 (t,  $J$  = 7.4 Hz, 1H), 7.51 – 7.35 (m, 6H), 7.16 (t,  $J$  = 7.9 Hz, 1H).  $^{13}C$  NMR (100 MHz,  $CDCl_3$ ):  $\delta$  = 194.8, 165.4, 136.5, 135.6, 135.3, 134.0, 133.6, 133.0, 132.0, 130.3, 129.3, 128.5, 128.2, 127.3, 126.2, 120.8. IR (thin film):  $\nu_{max}$  ( $cm^{-1}$ ) = 3291, 3062, 1667, 1597, 1509, 1485, 1316, 1283, 751, 703, 655; HRMS (ESI) calcd for  $C_{20}H_{14}BrNNaO_2$   $[M+Na]^+$ : 404.0081. Found: 404.0083.

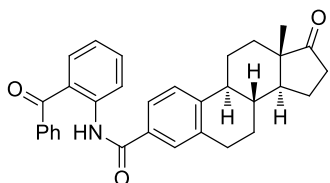

The corresponding substituted benzoyl chloride was prepared according to the literature procedure.<sup>[8-9]</sup> **1ak.** Yellow solid, 295.2 mg, 87% yield, mp 114.9-116.4 °C.  $^1H$  NMR (400 MHz,  $CDCl_3$ ):  $\delta$  = 11.89 (s, 1H), 8.88 (d,  $J$  = 8.2 Hz, 1H), 7.83 – 7.80 (m, 2H), 7.73 – 7.71 (m, 2H), 7.63 – 7.58 (m, 3H), 7.50 (t,  $J$  = 7.6 Hz, 2H), 7.42 (d,  $J$  = 8.1 Hz, 1H), 7.13 – 7.09 (m, 1H), 3.08 – 2.94 (m, 2H), 2.56 – 2.42 (m, 2H), 2.40 – 2.31 (m, 1H), 2.18 – 2.13 (m, 1H), 2.11 – 2.04 (m, 2H), 2.02 – 1.96 (m, 1H), 1.70 – 1.61 (m, 2H), 1.60 – 1.45 (m, 4H), 0.92 (s, 3H).  $^{13}C$  NMR (100 MHz,  $CDCl_3$ ):

$\delta = 220.4, 200.1, 165.8, 144.1, 141.1, 138.7, 137.1, 134.5, 133.9, 132.2, 131.9, 129.7, 128.2, 125.7, 124.3, 122.9, 121.9, 121.3, 50.4, 47.8, 44.4, 37.7, 35.7, 31.4, 29.3, 26.2, 25.5, 21.5, 13.7$ . IR (thin film):  $\nu_{\max}$  ( $\text{cm}^{-1}$ ) = 3289, 2925, 1738, 1526, 1447, 1261, 715, 701; HRMS (ESI) calcd for  $\text{C}_{32}\text{H}_{31}\text{NNaO}_3$   $[\text{M}+\text{Na}]^+$ : 500.2202. Found: 500.2195.

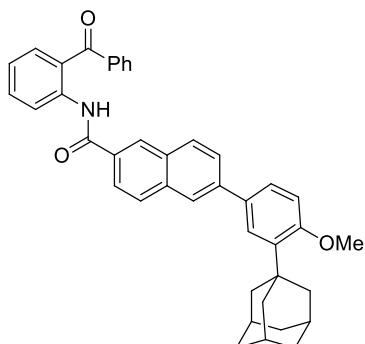

The corresponding substituted benzoyl chloride was prepared according to the literature procedure.<sup>[9]</sup> **1a**. Yellow solid, 0.32 g, 54% yield, mp 146.0-148.8 °C.  $^1\text{H}$  NMR (400 MHz,  $\text{CDCl}_3$ ):  $\delta = 12.16$  (s, 1H), 8.98 (d,  $J = 8.2$  Hz, 1H), 8.62 (s, 1H), 8.14 (dd,  $J = 8.6, 1.7$  Hz, 1H), 8.09 – 7.99 (m, 3H), 7.82 (dd,  $J = 8.5, 1.6$  Hz, 1H), 7.79 – 7.74 (m, 2H), 7.71 – 7.59 (m, 4H), 7.57 – 7.49 (m, 3H), 7.17 – 7.13 (m, 1H), 7.00 (d,  $J = 8.5$  Hz, 1H), 3.91 (s, 3H), 2.21 (d,  $J = 1.8$  Hz, 6H), 2.12 (s, 3H), 1.82 (s, 6H).  $^{13}\text{C}$  NMR (100 MHz,  $\text{CDCl}_3$ ):  $\delta = 200.2, 165.7, 158.8, 141.2, 141.0, 138.8, 138.75, 135.4, 134.6, 134.0, 132.4, 132.2, 131.4, 131.1, 129.7, 129.6, 128.7, 128.2, 128.1, 126.4, 125.8, 125.6, 124.5, 123.8, 122.9, 122.0, 121.4, 112.0, 55.0, 40.5, 37.1, 37.0, 29.0$ . IR (thin film):  $\nu_{\max}$  ( $\text{cm}^{-1}$ ) = 3303, 2904, 2849, 1679, 1602, 1582, 1448, 1238, 700, 643; HRMS (ESI) calcd for  $\text{C}_{41}\text{H}_{37}\text{NNaO}_3$   $[\text{M}+\text{Na}]^+$ : 614.2671. Found: 614.2668.

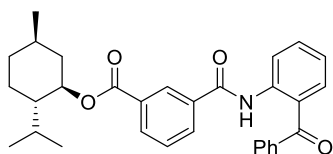

The corresponding substituted benzoyl chloride was prepared according to the literature procedure.<sup>[9-10]</sup> **1am**. White solid, 0.58 g, 60% yield, mp 105.7-107.4 °C.  $^1\text{H}$  NMR (400 MHz,  $\text{CDCl}_3$ ):  $\delta = 12.08$  (s, 1H), 8.88 (dd,  $J = 8.8, 0.8$  Hz, 1H), 8.76 (s, 1H), 8.24 – 8.22 (m, 2H), 7.74 – 7.69 (m, 2H), 7.67 – 7.61 (m, 2H), 7.60 – 7.57 (m, 2H), 7.50 – 7.46 (m, 2H), 7.14 (td,  $J = 7.6, 0.9$  Hz, 1H), 4.98 (td,  $J = 10.8, 4.4$  Hz, 1H), 2.16 – 2.13 (m, 1H), 2.06 – 1.95 (m, 1H), 1.74 – 1.71 (m, 2H), 1.65 – 1.51 (m, 2H), 1.21 – 1.05 (m, 2H), 0.95 – 0.87 (m, 7H), 0.80 (d,  $J = 6.9$  Hz, 3H).  $^{13}\text{C}$  NMR (100 MHz,  $\text{CDCl}_3$ ):  $\delta = 200.1, 165.1, 164.8, 140.8, 138.6, 134.9, 134.5, 133.9, 132.8, 132.3,$



131.6, 131.1, 129.8, 128.9, 128.7, 128.2, 123.1, 122.3, 121.3, 75.2, 47.0, 40.8, 34.2, 31.4, 26.3, 23.4, 22.0, 20.7, 16.3. IR (thin film):  $\nu_{\max}$  (cm<sup>-1</sup>) = 3287, 2956, 2927, 1717, 1584, 1449, 1262, 705, 643; HRMS (ESI) calcd for C<sub>31</sub>H<sub>33</sub>NNaO<sub>4</sub> [M+Na]<sup>+</sup>: 506.2307. Found: 506.2309.

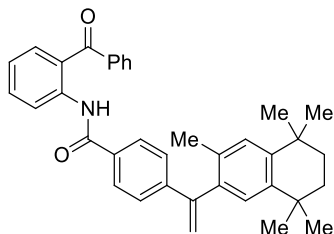

The corresponding substituted benzoyl chloride was prepared according to the literature procedure.<sup>[9]</sup> **1an**. Yellow solid, 412.0 mg, 94% yield, mp 89.0-90.3 °C. <sup>1</sup>H NMR (400 MHz, CDCl<sub>3</sub>):  $\delta$  = 8.95 (s, 1H), 8.63 (d, *J* = 8.3 Hz, 1H), 7.90 (d, *J* = 8.4 Hz, 2H), 7.56 – 7.52 (m, 3H), 7.44 – 7.40 (m, 2H), 7.39 – 7.32 (m, 4H), 7.17 – 7.09 (m, 3H), 5.84 (s, 1H), 5.35 (s, 1H), 1.98 (s, 3H), 1.73 (s, 4H), 1.33 (s, 6H), 1.30 (s, 6H). <sup>13</sup>C NMR (100 MHz, CDCl<sub>3</sub>):  $\delta$  = 164.8, 149.0, 144.8, 144.4, 142.4, 139.2, 138.0, 133.7, 132.7, 131.5, 131.4, 129.9, 128.9, 128.6, 128.1, 128.0, 127.1, 127.0, 123.5, 122.3, 119.1, 116.6, 112.2, 97.0, 84.6, 35.22, 35.20, 34.0, 33.9, 31.9, 31.88, 19.9. IR (thin film):  $\nu_{\max}$  (cm<sup>-1</sup>) = 3319, 2958, 2924, 1683, 1583, 1448, 1294, 700, 643; HRMS (ESI) calcd for C<sub>37</sub>H<sub>37</sub>NNaO<sub>2</sub> [M+Na]<sup>+</sup>: 550.2722. Found: 550.2721.

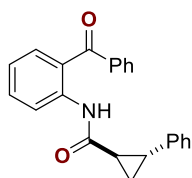

The corresponding acid chloride was prepared according to the literature procedure.<sup>[9]</sup> **1ao**. White solid, 1.2 g, 91% yield, mp 127.0-128.3 °C. <sup>1</sup>H NMR (400 MHz, CDCl<sub>3</sub>):  $\delta$  = 11.19 (s, 1H), 8.71 (d, *J* = 8.1 Hz, 1H), 7.73 – 7.68 (m, 2H), 7.62 – 7.55 (m, 3H), 7.52 – 7.46 (m, 2H), 7.32 – 7.27 (m, 2H), 7.23 – 7.18 (m, 1H), 7.16 – 7.12 (m, 2H), 7.09 (td, *J* = 7.9, 1.1 Hz, 1H), 2.65 (ddd, *J* = 9.3, 6.5, 4.1 Hz, 1H), 1.92 (ddd, *J* = 8.3, 5.1, 4.1 Hz, 1H), 1.78 – 1.72 (m, 1H), 1.39 (ddd, *J* = 8.2, 6.5, 4.5 Hz, 1H). <sup>13</sup>C NMR (100 MHz, CDCl<sub>3</sub>):  $\delta$  = 199.7, 171.0, 140.6, 140.2, 138.5, 134.3, 133.5, 132.4, 129.8, 128.4, 128.2, 126.3, 126.0, 122.8, 121.8, 121.3, 28.1, 26.1, 16.9. IR (thin film):  $\nu_{\max}$  (cm<sup>-1</sup>) = 3312, 3061, 1690, 1521, 1448, 1262, 955, 754, 642; HRMS (ESI) calcd for C<sub>23</sub>H<sub>19</sub>NNaO<sub>2</sub> [M+Na]<sup>+</sup>: 364.1308. Found: 364.1365.

## 2. Procedure for the synthesis of substrate 1aa.<sup>[11]</sup>

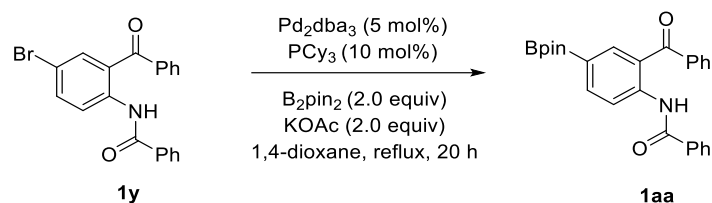

To an oven-dried Schlenk tube were added compound **1y** (380.0 mg, 1.0 mmol, 1.0 equiv),  $\text{B}_2\text{pin}_2$  (508.0 mg, 2.0 mmol, 2.0 equiv),  $\text{Pd}_2\text{dba}_3$  (46.0 mg, 0.05 mmol, 5 mol%), tricyclohexylphosphine (28.1 mg, 0.1 mmol, 10 mol%), potassium acetate (197.0 mg, 2.0 mmol, 2.0 equiv) and 1,4-dioxane (10 mL). Then the mixture was heated to reflux and stirred for 20 h under argon. After the reaction was complete (monitored by TLC), the reaction mixture was cooled to rt, filtered through a short pad of silica gel, and concentrated under reduced pressure. Purification by flash column chromatography on silica gel (petroleum ether/ethyl acetate = 10:1) gave **1aa** as a white solid (0.25 g, 58% yield, mp 170.4-171.1 °C).  $^1\text{H}$  NMR (400 MHz,  $\text{CDCl}_3$ ):  $\delta$  = 12.04 (s, 1H), 8.92 (d,  $J$  = 8.2 Hz, 1H), 8.08 (d,  $J$  = 7.8 Hz, 4H), 7.75 (d,  $J$  = 7.3 Hz, 2H), 7.61 (t,  $J$  = 7.4 Hz, 1H), 7.57 – 7.48 (m, 5H), 1.31 (s, 12H).  $^{13}\text{C}$  NMR (100 MHz,  $\text{CDCl}_3$ ):  $\delta$  = 200.4, 165.8, 143.3, 141.0, 140.3, 138.8, 134.5, 132.5, 132.1, 130.0, 128.8, 128.4, 127.4, 122.5, 120.3, 84.0, 24.8.  $^{11}\text{B}$  NMR (128 MHz,  $\text{CDCl}_3$ ):  $\delta$  = 31.4 (s). IR (thin film):  $\nu_{\text{max}}$  ( $\text{cm}^{-1}$ ) = 2978, 2927, 1685, 1582, 1362, 1294, 1144, 703, 649; HRMS (ESI) calcd for  $\text{C}_{26}\text{H}_{26}\text{BNNaO}_4$   $[\text{M}+\text{Na}]^+$ : 450.1852. Found: 450.1848.

### 3. Procedure for the synthesis of substrate **1ab**.<sup>[12]</sup>

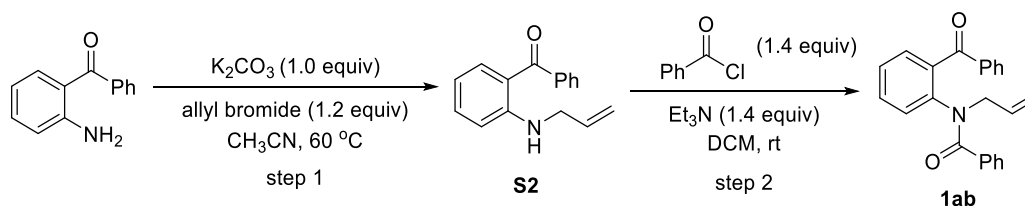

Step 1: To a solution of 2-aminophenyl-(phenyl)methanone (986.0 mg, 5.0 mmol, 1.0 equiv) and  $\text{K}_2\text{CO}_3$  (691.1 mg, 5.0 mmol, 1.0 equiv) in  $\text{CH}_3\text{CN}$  (10 mL) was added allyl bromide (726.0 mg, 6.0 mmol, 1.2 equiv) at rt. The mixture was stirred at 60 °C for 24 h. After the reaction was complete (monitored by TLC), the crude reaction mixture was filtrated through a short pad of silica gel, and concentrated under reduced pressure. Purification by flash column chromatography on silica gel (petroleum ether/ethyl acetate = 10:1) gave product **S2** as yellow oil (0.95 g, 80% yield), which was directly used for the next step.

Step 2: compound **1ab** was prepared according to **RP1** (page S-3).

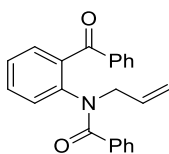

**1ab**. White solid, 0.91 g, 66% yield, mp 105.5-106.4 °C. <sup>1</sup>H NMR (400 MHz, DMSO-D<sub>6</sub>): δ = 7.81 – 6.96 (m, 14H), 6.08 – 5.90 (m, 1H), 5.19 – 5.01 (m, 2H), 4.76 (d, *J* = 12.8 Hz, 1H), 4.20 – 3.75 (m, 1H). <sup>13</sup>C NMR (100 MHz, DMSO-D<sub>6</sub>): δ = 194.5, 168.5, 142.1, 136.2, 135.5, 135.0, 133.7, 133.3, 131.9, 130.3, 129.6, 129.58, 128.5, 128.4, 127.6, 126.7, 117.6, 52.9. IR (thin film): ν<sub>max</sub> (cm<sup>-1</sup>) = 3061, 2920, 1663, 1595, 1340, 1265, 927, 702, 636; HRMS (ESI) calcd for C<sub>23</sub>H<sub>19</sub>NNaO<sub>2</sub> [M+Na]<sup>+</sup>: 364.1308. Found: 364.1308.

#### 4. Procedure for the synthesis of substrate **1ac**.<sup>[13]</sup>

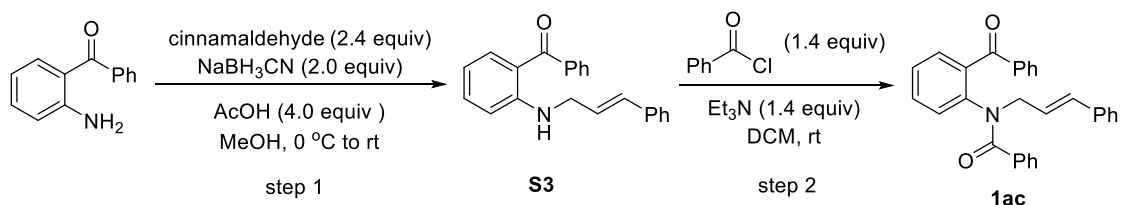

Step 1: To a solution of 2-aminophenyl-(phenyl)methanone (986.0 mg, 5.0 mmol, 1.0 equiv) in methanol (10 mL), acetic acid (1.21 g, 1.1 mL, 20.0 mmol, 4.0 equiv) was added dropwise at 0 °C. NaBH<sub>3</sub>CN (628.4 mg, 10.0 mmol, 2.0 equiv) was added subsequently and stirred for 5 min at this temperature. Then cinnamaldehyde (1.59 g, 12.0 mmol, 2.4 equiv) was added to the reaction mixture, which was then allowed to stir for 22 h at rt. After the reaction was complete (monitored by TLC), the crude reaction mixture was quenched with ice cold water, extracted with ethyl acetate (20 mL x 3). The combined organic layers were washed with brine, dried over anhydrous Na<sub>2</sub>SO<sub>4</sub>, filtered, and concentrated under reduced pressure. Purification by flash column chromatography on silica gel (petroleum ether/ethyl acetate = 80:1) afforded the product **S3** as yellow solid (0.95 g, 61% yield), which was directly used for the next step.

Step 2: compound **1ac** was prepared according to **RP1** (page S-3).

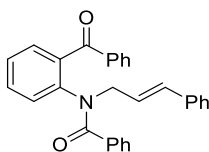

**1ac.** White solid, 0.70 g, 84% yield, mp 57.2-59.1 °C. <sup>1</sup>H NMR (400 MHz, CDCl<sub>3</sub>): δ = 7.52 (t, *J* = 7.0 Hz, 1H), 7.45 – 6.99 (m, 18H), 6.54 – 6.13 (m, 2H), 5.18 – 5.04 (m, 1H), 4.42 – 4.07 (m, 1H). <sup>13</sup>C NMR (100 MHz, CDCl<sub>3</sub>): δ = 194.6, 169.8, 142.8, 136.6, 136.5, 135.6, 133.1, 133.0, 131.4, 130.5, 130.4, 130.1, 129.5, 129.0, 128.4, 128.1, 127.6, 126.4, 125.0, 53.4. IR (thin film): ν<sub>max</sub> (cm<sup>-1</sup>) = 3059, 2923, 1663, 1647, 1313, 1265, 967, 763, 702; HRMS (ESI) calcd for C<sub>29</sub>H<sub>23</sub>NNaO<sub>2</sub> [M+Na]<sup>+</sup>: 440.1621. Found: 440.1620.

### 5. Procedure for the synthesis of substrate **1ad**.<sup>[14]</sup>

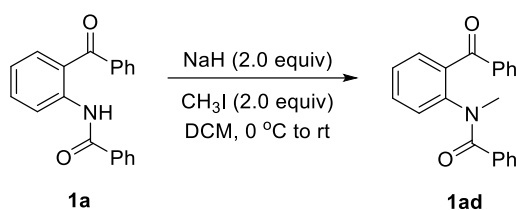

To a solution of NaH (80.0 mg, 2.0 mmol, 2.0 equiv) in DCM (3 mL) at 0 °C, **1a** (301.0 mg, 1.0 mmol, 1.0 equiv) was added. The reaction mixture was stirred for 0.5 h at this temperature before iodomethane (283.9 mg, 2.0 mmol, 2.0 equiv) was added. Then the reaction mixture was warmed to rt and stirred for 10 h. After the reaction was complete (monitored by TLC), the crude reaction mixture was quenched with water and extracted with DCM (10 mL x 3). The combined organic layers were washed with brine (20 mL), dried over Na<sub>2</sub>SO<sub>4</sub> and concentrated under vacuum. Purification by flash column chromatography on silica gel (petroleum ether/ethyl acetate = 2:1) afforded the desired product **1ad** as colorless oil (283.5mg, 90% yield). <sup>1</sup>H NMR (400 MHz, CDCl<sub>3</sub>): δ = 7.51 – 7.41 (m, 2H), 7.38 – 7.08 (m, 10H), 7.00 – 6.90 (m, 2H), 3.41 (s, 3H). <sup>13</sup>C NMR (100 MHz, CDCl<sub>3</sub>): δ = 194.5, 169.8, 144.2, 136.3, 135.7, 135.2, 132.9, 131.7, 130.3, 129.8, 129.4, 129.3, 128.9, 128.0, 127.4, 126.2, 39.0. IR (thin film): ν<sub>max</sub> (cm<sup>-1</sup>) = 3060, 2925, 1663, 1596, 1486, 1367, 765, 703, 654; HRMS (ESI) calcd for C<sub>21</sub>H<sub>17</sub>NNaO<sub>2</sub> [M+Na]<sup>+</sup>: 338.1152. Found: 338.1149.

### 6. Representative procedure for the synthesis of substrates **1ae–1ai**.

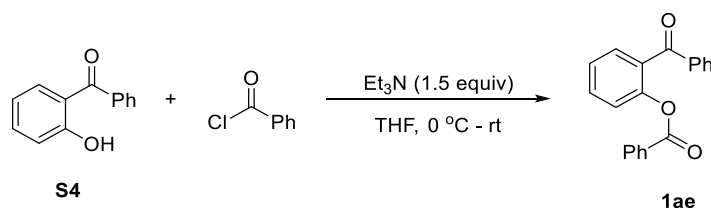

**Preparation of compound 1ae.** To a solution of (2-hydroxyphenyl)(phenyl)methanone **S4**

(1.98 g, 10 mmol, 1.0 equiv) in dry THF (20 mL) was added Et<sub>3</sub>N (2.09 mL, 15 mmol, 1.5 equiv) and benzoyl chloride (13.5 mmol, 1.56 mL, 1.35 equiv) at 0 °C. The reaction mixture was stirred at room temperature until the reaction was completed (monitored by TLC). Then, the reaction mixture was quenched with water and extracted with DCM. The combined organic layers were dried over anhydrous Na<sub>2</sub>SO<sub>4</sub>, and evaporated under reduced pressure. The residue was purified by flash column chromatography on silica gel (petroleum ether/ethyl acetate = 30:1) to afford compound **1ae**<sup>[15]</sup> as a colorless oil (1.89 g, 63% yield). <sup>1</sup>H NMR (400 MHz, CDCl<sub>3</sub>): δ = 7.84 – 7.81 (m, 2H), 7.80 – 7.72 (m, 2H), 7.62 – 7.60 (m, 2H), 7.55 – 7.50 (m, 1H), 7.49 – 7.45 (m, 1H), 7.41 – 7.33 (m, 6H). <sup>13</sup>C NMR (100 MHz, CDCl<sub>3</sub>): δ = 194.8, 164.6, 148.8, 137.6, 133.5, 132.9, 132.2, 131.9, 130.4, 130.0, 129.7, 128.8, 128.31, 128.27, 125.8, 123.3.

The following substrates **1af–1aj** were prepared analogously.

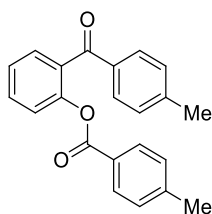

**1af.** Yellow solid, 373 mg, 66% yield, mp 99.4-99.7 °C. <sup>1</sup>H NMR (500 MHz, CDCl<sub>3</sub>): δ = 7.72 (d, *J* = 8.2 Hz, 2H), 7.68 (d, *J* = 8.2 Hz, 2H), 7.59 – 7.56 (m, 2H), 7.38 – 7.35 (m, 2H), 7.17– 7.13 (m, 4H), 2.38 (s, 3H), 2.33 (s, 3H). <sup>13</sup>C NMR (125 MHz, CDCl<sub>3</sub>): δ = 194.5, 164.6, 148.8, 144.3, 143.8, 135.0, 132.2, 131.8, 130.2, 130.1, 130.0, 128.99, 128.95, 126.2, 125.6, 123.3, 21.7, 21.6. IR (thin film): ν<sub>max</sub> (cm<sup>-1</sup>) = 2920, 1732, 1659, 1603, 1446, 1297, 1262, 1197, 1176, 1100, 1061, 1017, 929; HRMS (ESI) calcd for C<sub>22</sub>H<sub>18</sub>O<sub>3</sub>Na [M+Na]<sup>+</sup>: 353.1148. Found: 353.1146.

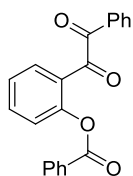

**1ag.** Yellow solid, 946 mg, 95% yield, mp 73.0-74.1 °C. <sup>1</sup>H NMR (400 MHz, CDCl<sub>3</sub>): δ = 8.17 (dd, *J* = 7.9, 1.7 Hz, 1H), 7.78 – 7.72 (m, 5H), 7.55 – 7.47 (m, 3H), 7.33 – 7.27 (m, 5H). <sup>13</sup>C NMR (100 MHz, CDCl<sub>3</sub>): δ = 193.1, 192.6, 164.3, 151.3, 135.7, 134.4, 133.7, 131.9, 131.1, 130.0, 129.9, 128.6, 128.2, 128.1, 127.1, 126.6, 124.0. IR (thin film): ν<sub>max</sub> (cm<sup>-1</sup>) = 2921, 2851, 1742,

1663, 1599, 1449, 1247, 1192, 1177, 1104, 1047, 1019, 702, 633; HRMS (ESI) calcd for  $C_{21}H_{14}O_4Na$   $[M+Na]^+$ : 353.0784. Found: 353.0779.

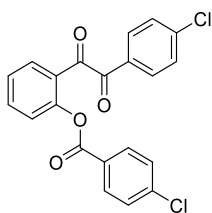

**1ah.** White solid, 251 mg, 41% yield, mp 130.0-130.9 °C.  $^1H$  NMR (400 MHz,  $CDCl_3$ ):  $\delta$  = 8.12 (dd,  $J$  = 7.9, 1.6 Hz, 1H), 7.77 – 7.65 (m, 5H), 7.49 (td,  $J$  = 7.9, 0.9 Hz, 1H), 7.33 – 7.26 (m, 5H).  $^{13}C$  NMR (100 MHz,  $CDCl_3$ ):  $\delta$  = 192.4, 191.2, 163.5, 150.9, 141.4, 140.5, 135.9, 131.3, 131.2, 130.2, 129.0, 128.6, 127.0, 126.8, 126.6, 123.9. IR (thin film):  $\nu_{max}$  ( $cm^{-1}$ ) = 2920, 2850, 1634, 1470, 1384, 1092, 1015; HRMS (ESI) calcd for  $C_{21}H_{12}Cl_2O_4Na$   $[M+Na]^+$ : 421.0005. Found: 421.0006.

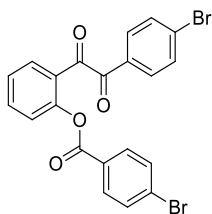

**1ai.** White solid, 250 mg, 21% yield, mp 113.6-114.2 °C.  $^1H$  NMR (400 MHz,  $CDCl_3$ ):  $\delta$  = 8.12 (dd,  $J$  = 7.8, 1.4 Hz, 1H), 7.77 – 7.73 (m, 1H), 7.63 – 7.56 (m, 4H), 7.52 – 7.43 (m, 5H), 7.28 – 7.26 (m, 1H).  $^{13}C$  NMR (100 MHz,  $CDCl_3$ ):  $\delta$  = 192.4, 191.4, 163.7, 150.9, 135.9, 132.1, 131.7, 131.33, 131.3, 131.2, 130.6, 130.3, 129.2, 127.1, 127.0, 126.9, 123.9. IR (thin film):  $\nu_{max}$  ( $cm^{-1}$ ) = 2921, 2851, 1741, 1654, 1586, 1398, 1255, 1195, 1132, 1072, 1052, 1009, 748, 632; HRMS (ESI) calcd for  $C_{21}H_{12}Br_2O_4Na$   $[M+Na]^+$ : 510.8974. Found: 510.8984.

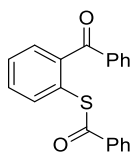

**1aj.** Colorless oil, 50 mg, 16% yield.  $^1H$  NMR (400 MHz,  $CDCl_3$ ):  $\delta$  = 7.90 – 7.76 (m, 4H), 7.67 (dd,  $J$  = 7.7, 1.1 Hz, 1H), 7.60 (td,  $J$  = 7.6, 1.6 Hz, 1H), 7.57 – 7.48 (m, 4H), 7.42 – 7.37 (m, 4H).  $^{13}C$  NMR (100 MHz,  $CDCl_3$ ):  $\delta$  = 196.2, 189.2, 144.0, 137.5, 137.0, 136.3, 133.6, 133.3, 130.6, 130.2, 129.3, 129.0, 128.6, 128.4, 127.5, 125.9. IR (thin film):  $\nu_{max}$  ( $cm^{-1}$ ) = 2961, 2924, 2853,

1668, 1596, 1447, 1262, 1023, 801; HRMS (ESI) calcd for C<sub>20</sub>H<sub>14</sub>O<sub>2</sub>SNa [M+Na]<sup>+</sup>: 341.0607.  
Found: 341.0607.

### 7. Procedure for the syntheses of substrates 5m-5n.

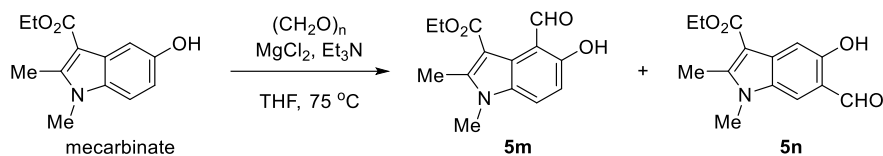

The compounds **5m** and **5n** were prepared according to the known procedure.<sup>[16]</sup> To a solution of anhydrous magnesium dichloride (1.9 g, 20 mmol) and solid paraformaldehyde (0.9 g, 30 mmol) in dry THF (30 mL), triethylamine (2.8 mL, 20 mmol) was added dropwise by syringe under N<sub>2</sub> atmosphere and the mixture is stirred for 10 min. Mecarbinato (2.3 g, 10 mmol) was added and the reaction mixture was heated under reflux for 24 h. The reaction mixture was cooled to room temperature, and quenched with 1N HCl and extracted with ethyl acetate. The combined organic layers were washed with brine, dried over Na<sub>2</sub>SO<sub>4</sub>, filtered, and concentrated under reduced pressure. Purification by flash column chromatography on silica gel (petroleum ether/ethyl acetate = 4:1) to afford product **5m**.<sup>[16]</sup> Product **5n** was obtained when the eluent was switched to petroleum ether/ethyl acetate = 2:1.

**5m**.<sup>[16]</sup> Pale yellow solid, 1.23 g, 47% yield, mp 146.1-147.6 °C. <sup>1</sup>H NMR (400 MHz, CDCl<sub>3</sub>): δ = 12.56 (s, 1H), 10.94 (s, 1H), 7.42 (d, *J* = 8.9 Hz, 1H), 6.83 (d, *J* = 8.9 Hz, 1H), 4.38 (q, *J* = 7.1 Hz, 2H), 3.70 (s, 3H), 2.69 (s, 3H), 1.40 (t, *J* = 7.1 Hz, 3H). <sup>13</sup>C NMR (100 MHz, CDCl<sub>3</sub>): δ = 198.3, 166.2, 160.6, 145.7, 130.6, 125.5, 118.3, 112.5, 111.4, 105.0, 60.1, 29.9, 14.3, 12.7.

**5n**. Pale yellow solid, 1.23 g, 47% yield, mp 174.8-175.0 °C. <sup>1</sup>H NMR (400 MHz, CDCl<sub>3</sub>): δ = 10.73 (s, 1H), 9.88 (s, 1H), 7.60 (s, 1H), 7.36 (s, 1H), 4.39 (q, *J* = 7.1 Hz, 2H), 3.72 (s, 3H), 2.78 (s, 3H), 1.45 (t, *J* = 7.1 Hz, 3H). <sup>13</sup>C NMR (100 MHz, CDCl<sub>3</sub>): δ = 195.2, 165.1, 156.3, 151.3, 133.6, 131.0, 116.4, 114.4, 107.0, 104.1, 59.6, 29.7, 14.5, 12.2. IR (thin film): ν<sub>max</sub> (cm<sup>-1</sup>) = 2960, 2930, 2859, 1728, 1689, 1634, 1469, 1382, 1277, 1188, 1099, 756; HRMS (ESI) calcd for C<sub>14</sub>H<sub>15</sub>NNaO<sub>4</sub> [M+Na]<sup>+</sup>: 284.0893. Found: 284.0898.

### 8. Procedure for the synthesis of substrate S6.

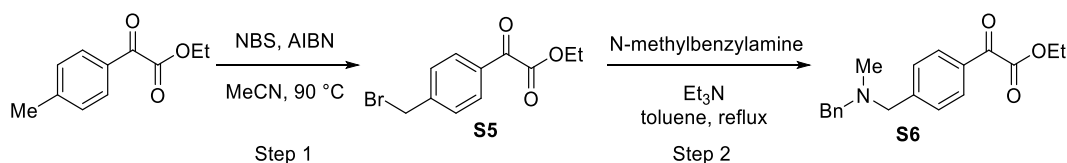

**Step 1:** Ethyl 2-oxo-2-(p-tolyl)acetate (780 mg, 4.06 mmol, 1.0 equiv) was dissolved in acetonitrile (10 mL) under N<sub>2</sub> atmosphere. NBS (801 mg, 4.5 mmol, 1.1 equiv) and AIBN (66 mg, 0.4 mmol, 0.1 equiv) were added and the reaction mixture was stirred for 1.5 h at 90°C to give a yellow solution. After the reaction was complete (monitored by TLC), the reaction mixture was cooled to rt. The solvents were evaporated under reduced pressure to give the crude mixture, which was purified by flash column chromatography on silica gel to afford the title compound **S5** as a white solid (897 mg, 82%).

**Step 2:** To a Young Schlenk tube were added compound **S5** (1.2 g, 4.5 mmol, 1.0 equiv), N-methylbenzylamine (0.7 mL, 5.4 mmol, 1.2 equiv), Et<sub>3</sub>N (0.75 mL, 5.4 mmol, 1.2 equiv) and toluene (10 mL). The tube was sealed and the reaction mixture was stirred at 110 °C. After the reaction was complete (monitored by TLC), the reaction mixture was cooled to rt. The solvents were evaporated under reduced pressure to give the crude mixture, which was purified by flash column chromatography on silica gel to afford the title compound **S6** as a pale yellow oil (1.26 g, 90%). <sup>1</sup>H NMR (400 MHz, CDCl<sub>3</sub>): δ = 8.00 – 7.92 (m, 2H), 7.53 (d, *J* = 8.5 Hz, 2H), 7.39 – 7.30 (m, 4H), 7.29 – 7.23 (m, 1H), 4.45 (q, *J* = 7.2 Hz, 2H), 3.59 (s, 2H), 3.55 (s, 2H), 2.20 (s, 3H), 1.43 (t, *J* = 7.2 Hz, 3H). <sup>13</sup>C NMR (100 MHz, CDCl<sub>3</sub>): δ = 186.1, 163.9, 147.6, 138.8, 131.3, 130.1, 129.1, 128.8, 128.3, 127.1, 62.2, 62.0, 61.3, 42.3, 14.1. IR (thin film): ν<sub>max</sub> (cm<sup>-1</sup>) = 2927, 2790, 1737, 1683, 1606, 1454, 1369, 1316, 1200, 1172, 1015, 982, 876, 741, 699; HRMS (ESI) calcd for C<sub>19</sub>H<sub>22</sub>NO<sub>3</sub> [M+H]<sup>+</sup>: 312.1594. Found: 312.1594.

## 9. Representative procedure for the Mo-catalyzed carbonyl-carbonyl olefination reaction for the syntheses of indoles 2.

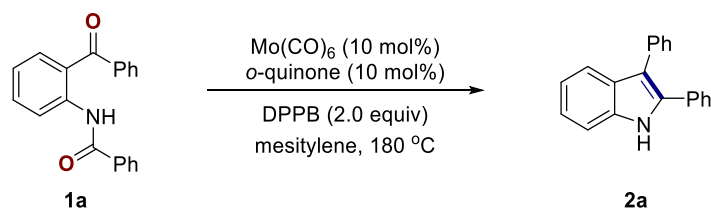

**Preparation of compound 2a.** To an oven-dried Young Schlenk tube (10 mL) were added Mo(CO)<sub>6</sub> (2.7 mg, 0.01 mmol, 10 mol%), 3,5-di-*tert*-butyl-*o*-benzoquinone (2.2 mg, 0.01 mmol, 10 mol%), and mesitylene (0.5 mL) under argon. The tube was sealed and the reaction mixture was stirred at 160 °C for 15 min. After cooling to ambient temperature, compound **1a** (30.1 mg, 0.1 mmol, 1.0 equiv) and DPPB (85.3 mg, 0.2 mmol, 2.0 equiv) were added to the reaction



mixture under argon. The tube was sealed and the reaction mixture was stirred at 180 °C. After the reaction was complete (monitored by TLC), the reaction mixture was cooled to rt, and passed through a short pad of silica gel (DCM/EtOAc = 1:1). The solvents were evaporated under reduced pressure to give the crude mixture, which was purified by flash column chromatography on silica gel (petroleum ether/*tert*-butyl methyl ether = 80:1 to 40:1) to afford the title compound **2a**<sup>[17]</sup> as a white solid (25.3 mg, 94% yield). <sup>1</sup>H NMR (400 MHz, CDCl<sub>3</sub>): δ = 8.20 (s, 1H), 7.85 (d, *J* = 7.9 Hz, 1H), 7.62 – 7.56 (m, 2H), 7.55 – 7.47 (m, 5H), 7.45 – 7.36 (m, 5H), 7.30 (t, *J* = 7.9 Hz, 1H). <sup>13</sup>C NMR (100 MHz, CDCl<sub>3</sub>): δ = 135.8, 135.0, 134.0, 132.6, 130.1, 128.7, 128.6, 128.5, 128.1, 127.6, 126.2, 122.6, 120.4, 119.6, 114.9, 110.9.

The following compounds **2b–2ad** were prepared analogously.

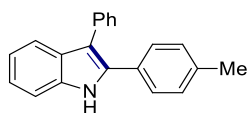

**2b.**<sup>[18]</sup> Colorless oil, 26.0 mg, 92% yield. <sup>1</sup>H NMR (400 MHz, CDCl<sub>3</sub>): δ = 8.18 (s, 1H), 7.77 (d, *J* = 7.9 Hz, 1H), 7.55 – 7.51 (m, 2H), 7.47 – 7.43 (m, 3H), 7.39 – 7.28 (m, 4H), 7.25 – 7.15 (m, 3H), 2.42 (s, 3H). <sup>13</sup>C NMR (100 MHz, CDCl<sub>3</sub>): δ = 137.5, 135.8, 135.2, 134.2, 130.1, 129.7, 129.4, 128.8, 128.5, 128.0, 126.1, 122.5, 120.3, 119.5, 114.6, 110.8, 21.2.

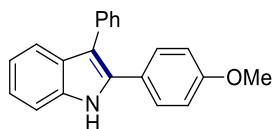

In lieu of the standard conditions, the reaction was performed with 30 mol% of Mo(CO)<sub>6</sub> and 30 mol% of *o*-quinone in mesitylene (2.0 mL, 0.4 mmol scale) at 160 °C. **2c.**<sup>[19]</sup> White solid, 101.7 mg, 85% yield. <sup>1</sup>H NMR (400 MHz, CDCl<sub>3</sub>): δ = 8.19 (s, 1H), 7.73 (d, *J* = 7.9 Hz, 1H), 7.52 – 7.48 (m, 2H), 7.46 – 7.25 (m, 7H), 7.22 – 7.18 (m, 1H), 6.92 – 6.88 (m, 2H), 3.85 (s, 3H). <sup>13</sup>C NMR (100 MHz, CDCl<sub>3</sub>): δ = 159.2, 135.7, 135.2, 134.1, 130.1, 129.4, 128.8, 128.5, 126.0, 125.2, 122.3, 120.3, 119.4, 114.1, 110.8, 55.2.

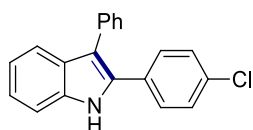

**2d.**<sup>[18]</sup> White solid, 24.5 mg, 81% yield. <sup>1</sup>H NMR (400 MHz, CDCl<sub>3</sub>): δ = 8.21 (s, 1H), 7.71 (d, *J* = 8.0 Hz, 1H), 7.49 – 7.40 (m, 5H), 7.39 – 7.27 (m, 6H), 7.23 – 7.16 (m, 1H). <sup>13</sup>C NMR (100 MHz,

CDCl<sub>3</sub>):  $\delta$  = 136.0, 134.7, 133.6, 132.8, 131.1, 130.1, 129.3, 128.9, 128.7, 128.6, 126.5, 123.0, 120.6, 119.8, 115.6, 110.9.

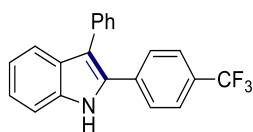

**2e.**<sup>[20]</sup> White solid, 29.0 mg, 86% yield. <sup>1</sup>H NMR (400 MHz, CDCl<sub>3</sub>):  $\delta$  = 8.26 (s, 1H), 7.72 (d,  $J$  = 8.0 Hz, 1H), 7.58 (d,  $J$  = 8.3 Hz, 2H), 7.52 (d,  $J$  = 8.3 Hz, 2H), 7.48 – 7.29 (m, 7H), 7.24 – 7.20 (m, 1H). <sup>13</sup>C NMR (100 MHz, CDCl<sub>3</sub>):  $\delta$  = 136.2, 134.5, 132.2, 130.1, 129.3 (q,  $J$  = 32.5 Hz), 128.74, 128.7, 128.1, 126.7, 125.6 (q,  $J$  = 3.7 Hz), 124.1 (q,  $J$  = 270.3 Hz), 123.4, 120.7, 120.0, 116.6, 111.1. <sup>19</sup>F NMR (377 MHz, CDCl<sub>3</sub>):  $\delta$  = – 62.5.

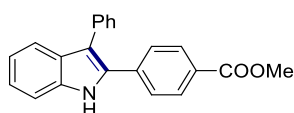

In lieu of the standard conditions, the reaction was performed with 30 mol% of Mo(CO)<sub>6</sub> and 30 mol% of *o*-quinone in mesitylene/dioxane (3/2, 1.25 mL, 0.2 mmol scale) at 160 °C.

**2f.**<sup>[21]</sup> White solid, 45.8 mg, 70% yield. <sup>1</sup>H NMR (400 MHz, CDCl<sub>3</sub>):  $\delta$  = 8.44 (s, 1H), 7.99 – 7.95 (m, 2H), 7.68 (d,  $J$  = 7.9 Hz, 1H), 7.51 – 7.46 (m, 2H), 7.45 – 7.37 (m, 5H), 7.35 – 7.31 (m, 1H), 7.31 – 7.25 (m, 1H), 7.18 (dd,  $J$  = 11.1, 3.9 Hz, 1H), 3.92 (s, 3H). <sup>13</sup>C NMR (100 MHz, CDCl<sub>3</sub>):  $\delta$  = 166.8, 137.1, 136.2, 134.6, 132.7, 130.1, 129.9, 128.8, 128.7, 128.67, 127.8, 126.6, 123.4, 120.7, 120.0, 116.7, 111.0, 52.2. IR (thin film):  $\nu_{\text{max}}$  (cm<sup>-1</sup>) = 3346, 2921, 1721, 1699, 1607, 1281, 1111, 771, 744, 702; HRMS (ESI) calcd for C<sub>22</sub>H<sub>17</sub>NNaO<sub>2</sub> [M+Na]<sup>+</sup>: 350.1157. Found: 350.1152.

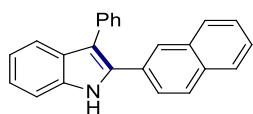

**2g.**<sup>[22]</sup> White solid, 29.1 mg, 91% yield. <sup>1</sup>H NMR (400 MHz, CDCl<sub>3</sub>):  $\delta$  = 8.33 (s, 1H), 7.96 (s, 1H), 7.84 – 7.72 (m, 4H), 7.52 – 7.44 (m, 6H), 7.41 – 7.37 (m, 2H), 7.35 – 7.27 (m, 2H), 7.22 – 7.18 (m, 1H). <sup>13</sup>C NMR (100 MHz, CDCl<sub>3</sub>):  $\delta$  = 136.1, 135.0, 134.0, 133.4, 132.6, 130.3, 130.2, 128.8, 128.5, 128.1, 128.0, 127.7, 126.6, 126.4, 126.3, 126.26, 122.8, 120.5, 119.7, 115.5, 110.9. IR (thin film):  $\nu_{\text{max}}$  (cm<sup>-1</sup>) = 3410, 3055, 1602, 1496, 1453, 1330, 773, 749, 701; HRMS (ESI) calcd for C<sub>24</sub>H<sub>17</sub>NNa [M+Na]<sup>+</sup>: 342.1259. Found: 342.1254.

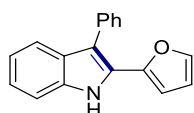

**2h.**<sup>[18]</sup> Yellow oil, 22.1 mg, 85% yield. <sup>1</sup>H NMR (400 MHz, CDCl<sub>3</sub>): δ = 8.64 (s, 1H), 7.68 – 7.63 (m, 3H), 7.58 – 7.53 (m, 2H), 7.49 – 7.43 (m, 3H), 7.31 (ddd, *J* = 8.2, 7.0, 1.2 Hz, 1H), 7.20 (ddd, *J* = 8.0, 7.1, 1.0 Hz, 1H), 6.43 – 6.41 (m, 2H). <sup>13</sup>C NMR (100 MHz, CDCl<sub>3</sub>): δ = 147.1, 141.3, 135.4, 134.6, 130.2, 128.7, 128.6, 126.9, 125.1, 122.9, 120.4, 119.5, 114.4, 111.8, 110.8, 106.8.

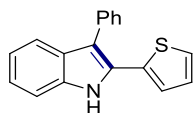

**2i.**<sup>[18]</sup> Brown oil, 22.3 mg, 81% yield. <sup>1</sup>H NMR (400 MHz, CDCl<sub>3</sub>): δ = 8.18 (s, 1H), 7.67 (d, *J* = 7.9 Hz, 1H), 7.62 – 7.57 (m, 2H), 7.55 – 7.49 (m, 2H), 7.47 – 7.40 (m, 2H), 7.32 (t, *J* = 7.5 Hz, 1H), 7.29 – 7.26 (m, 1H), 7.23 (t, *J* = 7.5 Hz, 1H), 7.14 – 7.11 (m, 1H), 7.04 (dd, *J* = 4.9, 3.8 Hz, 1H). <sup>13</sup>C NMR (100 MHz, CDCl<sub>3</sub>): δ = 135.7, 134.4, 130.5, 129.0, 128.5, 128.2, 127.4, 126.8, 125.3, 125.25, 123.0, 120.5, 119.6, 115.7, 110.7.

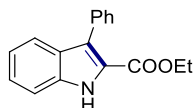

In lieu of the standard conditions, the reaction was performed with 30 mol% of Mo(CO)<sub>6</sub> and 30 mol% of *o*-quinone in mesitylene (2.0 mL, 0.4 mmol scale) at 160 °C. **2j.**<sup>[17]</sup> White solid, 88.0 mg, 83% yield. <sup>1</sup>H NMR (400 MHz, CDCl<sub>3</sub>): δ = 9.32 (s, 1H), 7.67 (dd, *J* = 8.2, 0.7 Hz, 1H), 7.61 – 7.59 (m, 2H), 7.52 – 7.45 (m, 3H), 7.44 – 7.36 (m, 2H), 7.18 (ddd, *J* = 8.0, 6.9, 1.0 Hz, 1H), 4.34 (q, *J* = 7.1 Hz, 2H), 1.26 (t, *J* = 7.1 Hz, 3H). <sup>13</sup>C NMR (100 MHz, CDCl<sub>3</sub>): δ = 162.2, 135.8, 133.5, 130.6, 127.9, 127.7, 127.1, 125.7, 124.2, 122.8, 121.7, 120.8, 111.7, 60.9, 14.0.

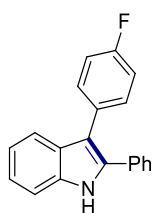

**2k.**<sup>[20]</sup> White solid, 25.0 mg, 87% yield. <sup>1</sup>H NMR (400 MHz, CDCl<sub>3</sub>): δ = 8.14 (s, 1H), 7.64 (d, *J* = 7.9 Hz, 1H), 7.41 – 7.35 (m, 5H), 7.34 – 7.28 (m, 3H), 7.27 – 7.22 (m, 1H), 7.19 – 7.14 (m, 1H), 7.10 – 7.03 (m, 2H). <sup>13</sup>C NMR (100 MHz, CDCl<sub>3</sub>): δ = 161.6 (d, *J* = 243.5 Hz), 135.8, 134.1, 132.4, 131.6 (d, *J* = 7.8 Hz), 130.9 (d, *J* = 3.3 Hz), 128.7, 128.66, 128.1, 127.8, 122.7, 120.5, 119.4, 115.4 (d, *J* = 21.1 Hz), 113.9, 110.9. <sup>19</sup>F NMR (377 MHz, CDCl<sub>3</sub>): δ = – 116.3.

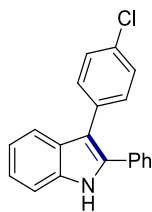

**2l.**<sup>[20]</sup> White solid, 27.0 mg, 89% yield. <sup>1</sup>H NMR (400 MHz, CDCl<sub>3</sub>): δ = 8.22 (s, 1H), 7.73 (d, *J* = 7.8 Hz, 1H), 7.50 – 7.37 (m, 10H), 7.34 (t, *J* = 7.5 Hz, 1H), 7.28 – 7.24 (m, 1H). <sup>13</sup>C NMR (100 MHz, CDCl<sub>3</sub>): δ = 135.8, 134.3, 133.6, 132.3, 131.9, 131.3, 128.73, 128.7, 128.4, 128.2, 127.9, 122.8, 120.6, 119.3, 113.7, 111.0.

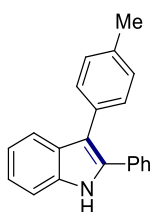

**2m.**<sup>[23]</sup> White solid, 24.1 mg, 85% yield. <sup>1</sup>H NMR (400 MHz, CDCl<sub>3</sub>): δ = 8.22 (s, 1H), 7.68 (d, *J* = 8.0 Hz, 1H), 7.48 – 7.41 (m, 3H), 7.36 – 7.27 (m, 5H), 7.25 – 7.17 (m, 3H), 7.18 – 7.13 (m, 1H), 2.40 (s, 3H). <sup>13</sup>C NMR (100 MHz, CDCl<sub>3</sub>): δ = 135.9, 135.7, 133.8, 132.8, 132.0, 130.0, 129.3, 128.9, 128.6, 128.1, 127.5, 122.6, 120.3, 119.7, 115.0, 110.9, 21.2. IR (thin film): ν<sub>max</sub> (cm<sup>-1</sup>) = 3407, 2920, 1602, 1515, 1456, 1329, 1250, 836, 759, 696; HRMS (ESI) calcd for C<sub>21</sub>H<sub>18</sub>N [M+H]<sup>+</sup>: 284.1434. Found: 284.1433.

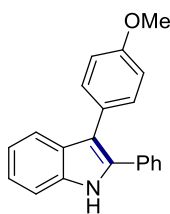

**2n.**<sup>[20]</sup> White solid, 24.8 mg, 83% yield. <sup>1</sup>H NMR (400 MHz, C<sub>3</sub>D<sub>6</sub>O): δ = 10.57 (s, 1H), 7.56 – 7.47 (m, 4H), 7.36 – 7.24 (m, 5H), 7.20 – 7.15 (m, 1H), 7.09 – 7.05 (m, 1H), 7.00 – 6.95 (m, 2H), 3.82 (s, 3H). <sup>13</sup>C NMR (100 MHz, C<sub>3</sub>D<sub>6</sub>O): δ = 158.4, 136.6, 133.9, 133.2, 131.1, 129.0, 128.5, 128.1, 127.8, 127.3, 122.1, 119.7, 119.0, 114.1, 114.0, 111.3, 54.6. IR (thin film): ν<sub>max</sub> (cm<sup>-1</sup>) = 3419, 2923, 1603, 1513, 1244, 1178, 1026, 771, 696; HRMS (ESI) calcd for C<sub>21</sub>H<sub>18</sub>NO [M+H]<sup>+</sup>: 300.1388. Found: 300.1384.

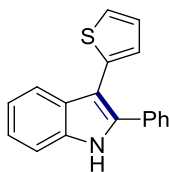

**2o.**<sup>[23]</sup> White solid, 22.6 mg, 82% yield. <sup>1</sup>H NMR (400 MHz, CDCl<sub>3</sub>): δ = 8.23 (s, 1H), 7.89 (d, *J* = 7.8 Hz, 1H), 7.59 – 7.53 (m, 2H), 7.46 – 7.40 (m, 4H), 7.38 – 7.25 (m, 3H), 7.18 – 7.12 (m, 2H). <sup>13</sup>C NMR (100 MHz, CDCl<sub>3</sub>): δ = 136.4, 135.6, 135.2, 132.2, 128.8, 128.6, 128.4, 128.1, 127.2, 126.2, 124.5, 122.9, 120.6, 119.8, 110.9, 107.9.

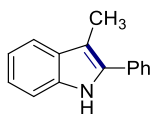

In lieu of the standard conditions, the reaction was performed with 30 mol% of Mo(CO)<sub>6</sub> and 30 mol% of *o*-quinone in mesitylene (1.0 mL, 0.2 mmol scale) at 180 °C. **2p.**<sup>[24]</sup> White solid, 36.0 mg, 87% yield. <sup>1</sup>H NMR (400 MHz, CDCl<sub>3</sub>): δ = 8.01 (s, 1H), 7.69 (d, *J* = 7.7 Hz, 1H), 7.66 – 7.60 (m, 2H), 7.54 (t, *J* = 7.6 Hz, 2H), 7.42 (t, *J* = 7.8 Hz, 2H), 7.32 – 7.20 (m, 2H), 2.54 (s, 3H). <sup>13</sup>C NMR (100 MHz, CDCl<sub>3</sub>): δ = 135.8, 134.0, 133.3, 130.0, 128.8, 127.7, 127.3, 122.3, 119.5, 119.0, 110.7, 108.7, 9.6.

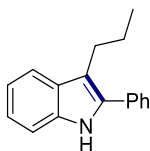

In lieu of the standard conditions, the reaction was performed with 30 mol% of Mo(CO)<sub>6</sub> and 30 mol% of *o*-quinone in mesitylene (2.0 mL, 0.4 mmol scale) at 180 °C. **2q.**<sup>[24]</sup> Yellow oil, 60.2 mg, 64% yield. <sup>1</sup>H NMR (400 MHz, C<sub>3</sub>D<sub>6</sub>O): δ = 10.22 (s, 1H), 7.71 – 7.66 (m, 2H), 7.65 – 7.61 (m, 1H), 7.53 – 7.46 (m, 2H), 7.44 – 7.41 (m, 1H), 7.39 – 7.33 (m, 1H), 7.17 – 7.11 (m, 1H), 7.09 – 7.04 (m, 1H), 2.96 – 2.89 (m, 2H), 1.82 – 1.72 (m, 2H), 1.01 (t, *J* = 7.4 Hz, 3H). <sup>13</sup>C NMR (100 MHz, C<sub>3</sub>D<sub>6</sub>O): δ = 137.4, 135.0, 134.6, 130.3, 129.5, 128.7, 128.0, 122.5, 119.71, 119.7, 113.7, 111.9, 27.5, 25.0, 14.6. IR (thin film): ν<sub>max</sub> (cm<sup>-1</sup>) = 3409, 3057, 2958, 1539, 1457, 1306, 757, 741, 696; HRMS (ESI) calcd for C<sub>17</sub>H<sub>18</sub>N [M+H]<sup>+</sup>: 236.1439. Found: 236.1434.

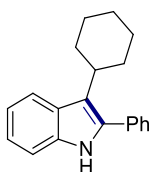

In lieu of the standard conditions, the reaction was performed with 30 mol% of Mo(CO)<sub>6</sub> and 30 mol% of *o*-quinone in mesitylene (1.0 mL, 0.2 mmol scale) at 180 °C. **2r**. White solid, 28.2 mg, 51% yield, mp 149.8-151.4 °C. <sup>1</sup>H NMR (400 MHz, C<sub>3</sub>D<sub>6</sub>O): δ = 10.14 (s, 1H), 7.83 (d, *J* = 8.0 Hz, 1H), 7.57 (d, *J* = 7.2 Hz, 2H), 7.49 (t, *J* = 7.6 Hz, 2H), 7.43 – 7.35 (m, 2H), 7.09 (t, *J* = 7.1 Hz, 1H), 7.01 (t, *J* = 7.5 Hz, 1H), 3.07 – 2.98 (m, 1H), 2.19 – 2.07 (m, 2H), 1.89 – 1.73 (m, 5H), 1.45 – 1.34 (m, 3H). <sup>13</sup>C NMR (100 MHz, C<sub>3</sub>D<sub>6</sub>O): δ = 137.8, 134.8, 134.7, 129.6, 129.4, 128.5, 128.3, 122.0, 121.6, 119.3, 118.6, 112.2, 37.4, 34.0, 27.9, 27.0. IR (thin film): ν<sub>max</sub> (cm<sup>-1</sup>) = 3399, 2922, 2852, 1455, 1447, 1309, 761, 743, 696; HRMS (ESI) calcd for C<sub>20</sub>H<sub>22</sub>N [M+H]<sup>+</sup>: 276.1747. Found: 276.1749.

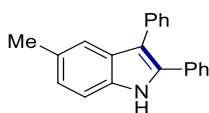

**2s**.<sup>[25]</sup> Yellow oil, 26.3 mg, 93% yield. <sup>1</sup>H NMR (400 MHz, C<sub>3</sub>D<sub>6</sub>O): δ = 10.51 (s, 1H), 7.51 – 7.47 (m, 2H), 7.42 – 7.36 (m, 6H), 7.34 – 7.25 (m, 4H), 7.02 (dd, *J* = 8.0, 1.4 Hz, 1H), 2.39 (s, 3H). <sup>13</sup>C NMR (100 MHz, C<sub>3</sub>D<sub>6</sub>O): δ = 136.8, 135.9, 135.2, 134.0, 131.0, 129.9, 129.6, 129.4, 129.3, 129.1, 128.2, 126.9, 124.7, 119.4, 114.7, 111.9, 21.7. IR (thin film): ν<sub>max</sub> (cm<sup>-1</sup>) = 3416, 2923, 2851, 1464, 1432, 764, 698; HRMS (ESI) calcd for C<sub>21</sub>H<sub>18</sub>N [M+H]<sup>+</sup>: 284.1439. Found: 284.1435.

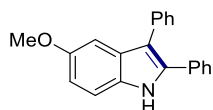

**2t**.<sup>[24]</sup> White solid, 25.5 mg, 85% yield. <sup>1</sup>H NMR (400 MHz, C<sub>3</sub>D<sub>6</sub>O): δ = 10.47 (s, 1H), 7.51 – 7.47 (m, 2H), 7.46 – 7.36 (m, 5H), 7.34 – 7.23 (m, 4H), 7.09 (d, *J* = 2.4 Hz, 1H), 6.87 (dd, *J* = 8.7, 2.4 Hz, 1H), 3.77 (s, 3H). <sup>13</sup>C NMR (100 MHz, C<sub>3</sub>D<sub>6</sub>O): δ = 155.6, 136.8, 135.8, 133.9, 132.6, 130.9, 129.9, 129.4, 129.3, 129.0, 128.2, 126.9, 115.0, 113.4, 112.9, 101.4, 55.9. IR (thin film): ν<sub>max</sub> (cm<sup>-1</sup>) = 3409, 2923, 1621, 1506, 1488, 1160, 1033, 761, 699; HRMS (ESI) calcd for C<sub>21</sub>H<sub>17</sub>NNaO [M+Na]<sup>+</sup>: 322.1208. Found: 322.1203.

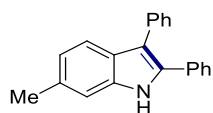

**2u**.<sup>[25]</sup> Colorless oil, 24.9 mg, 88% yield. <sup>1</sup>H NMR (400 MHz, CDCl<sub>3</sub>): δ = 8.08 (s, 1H), 7.64 (d, *J* = 8.1 Hz, 1H), 7.54 – 7.49 (m, 2H), 7.49 – 7.40 (m, 4H), 7.39 – 7.31 (m, 4H), 7.23 (s, 1H), 7.06 (dd, *J* = 8.1, 0.6 Hz, 1H), 2.54 (s, 3H). <sup>13</sup>C NMR (100 MHz, CDCl<sub>3</sub>): δ = 136.3, 135.2, 133.4, 132.8,

132.6, 130.1, 128.6, 128.5, 128.0, 127.4, 126.6, 126.1, 122.2, 119.3, 114.9, 110.8, 21.7.

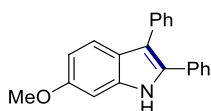

**2v.**<sup>[26]</sup> White solid, 23.4 mg, 78% yield. <sup>1</sup>H NMR (400 MHz, C<sub>3</sub>D<sub>6</sub>O):  $\delta$  = 10.45 (s, 1H), 7.50 – 7.45 (m, 2H), 7.44 – 7.42 (m, 1H), 7.42 – 7.36 (m, 4H), 7.34 – 7.23 (m, 4H), 7.01 (d,  $J$  = 1.9 Hz, 1H), 6.75 (dd,  $J$  = 8.7, 2.1 Hz, 1H), 3.83 (s, 3H). <sup>13</sup>C NMR (100 MHz, C<sub>3</sub>D<sub>6</sub>O):  $\delta$  = 157.9, 138.3, 136.8, 134.0, 133.8, 130.8, 129.4, 129.3, 128.8, 128.0, 126.9, 124.0, 120.5, 115.0, 111.0, 95.2, 55.7. IR (thin film):  $\nu_{\max}$  (cm<sup>-1</sup>) = 3331, 2923, 2852, 1601, 1457, 1197, 1029, 814, 763, 697; HRMS (ESI) calcd for C<sub>21</sub>H<sub>18</sub>NO [M+H]<sup>+</sup>: 300.1388. Found: 300.1383.

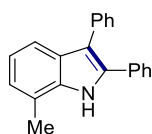

**2w.**<sup>[17]</sup> White solid, 25.2 mg, 89% yield. <sup>1</sup>H NMR (400 MHz, CDCl<sub>3</sub>):  $\delta$  = 8.19 (s, 1H), 7.67 (d,  $J$  = 7.7 Hz, 1H), 7.59 – 7.53 (m, 4H), 7.50 – 7.35 (m, 6H), 7.23 – 7.14 (m, 2H), 2.64 (s, 3H). <sup>13</sup>C NMR (100 MHz, CDCl<sub>3</sub>):  $\delta$  = 135.4, 135.2, 133.9, 132.8, 130.1, 128.6, 128.5, 128.3, 128.2, 127.6, 126.1, 123.2, 120.7, 120.0, 117.4, 115.6, 16.6.

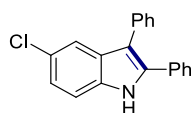

**2x.**<sup>[18]</sup> Yellow oil, 27.2mg, 90% yield. <sup>1</sup>H NMR (400 MHz, CDCl<sub>3</sub>):  $\delta$  = 8.20 (s, 1H), 7.68 (d,  $J$  = 1.9 Hz, 1H), 7.45 – 7.39 (m, 6H), 7.37 – 7.30 (m, 5H), 7.22 (dd,  $J$  = 8.6, 2.0 Hz, 1H). <sup>13</sup>C NMR (100 MHz, CDCl<sub>3</sub>):  $\delta$  = 135.4, 134.3, 134.1, 132.1, 130.0, 129.8, 128.69, 128.6, 128.1, 128.0, 126.5, 126.1, 122.9, 119.0, 114.7, 111.9.

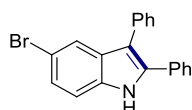

**2y.**<sup>[25]</sup> Yellow oil, 28.5 mg, 82% yield. <sup>1</sup>H NMR (400 MHz, C<sub>3</sub>D<sub>6</sub>O):  $\delta$  = 10.85 (s, 1H), 7.68 (s, 1H), 7.52 – 7.48 (m, 2H), 7.47 – 7.44 (m, 1H), 7.43 – 7.38 (m, 4H), 7.37 – 7.28 (m, 5H). <sup>13</sup>C NMR (100 MHz, C<sub>3</sub>D<sub>6</sub>O):  $\delta$  = 136.7, 136.0, 135.8, 133.2, 131.3, 130.9, 129.5, 129.4, 129.2, 128.7, 127.3, 125.7, 122.1, 114.6, 114.1, 113.6. IR (thin film):  $\nu_{\max}$  (cm<sup>-1</sup>) = 3407, 2918, 1601, 1507, 1449, 1307, 1071, 762, 698; HRMS (ESI) calcd for C<sub>20</sub>H<sub>15</sub>BrN [M+H]<sup>+</sup>: 348.0388. Found: 348.0386.

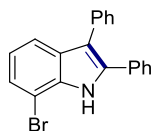

**2z.** White solid, 28.5 mg, 82% yield, mp 109.0-110.8 °C.  $^1\text{H}$  NMR (400 MHz,  $\text{CDCl}_3$ ):  $\delta$  = 8.42 (s, 1H), 7.67 (d,  $J$  = 8.0 Hz, 1H), 7.53 – 7.32 (m, 11H), 7.08 (t,  $J$  = 7.8 Hz, 1H).  $^{13}\text{C}$  NMR (100 MHz,  $\text{CDCl}_3$ ):  $\delta$  = 134.7, 134.6, 134.5, 132.1, 130.1, 129.9, 128.7, 128.6, 128.2, 128.1, 126.5, 124.8, 121.5, 118.9, 116.0, 104.5. IR (thin film):  $\nu_{\text{max}}$  ( $\text{cm}^{-1}$ ) = 3429, 3059, 2921, 1602, 1505, 1449, 1305, 783, 723, 607; HRMS (ESI) calcd for  $\text{C}_{20}\text{H}_{15}\text{BrN}$   $[\text{M}+\text{H}]^+$ : 348.0382. Found: 348.0384.

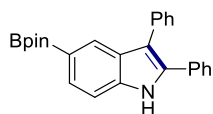

**2aa.** White solid, 30.5 mg, 77% yield, mp 210.1-213.2 °C.  $^1\text{H}$  NMR (400 MHz,  $\text{C}_3\text{D}_6\text{O}$ ):  $\delta$  = 10.76 (s, 1H), 8.05 (s, 1H), 7.64 – 7.59 (m, 1H), 7.55 – 7.41 (m, 7H), 7.37 – 7.27 (m, 4H), 1.32 (s, 12H).  $^{13}\text{C}$  NMR (100 MHz,  $\text{C}_3\text{D}_6\text{O}$ ):  $\delta$  = 139.4, 136.5, 135.2, 133.6, 131.1, 129.5, 129.43, 129.4, 129.0, 128.4, 127.6, 127.2, 115.6, 111.5, 84.0, 25.2.  $^{11}\text{B}$  NMR (128 MHz,  $\text{CDCl}_3$ ):  $\delta$  = 31.1 (s). IR (thin film):  $\nu_{\text{max}}$  ( $\text{cm}^{-1}$ ) = 3309, 2925, 2853, 1602, 1430, 1353, 1144, 1070, 858, 699; HRMS (ESI) calcd for  $\text{C}_{26}\text{H}_{27}\text{BNO}_2$   $[\text{M}+\text{H}]^+$ : 396.2134. Found: 396.2132.

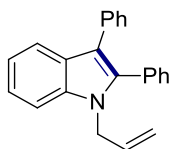

In lieu of the standard conditions, the reaction was performed with 30 mol% of  $\text{Mo}(\text{CO})_6$  and 30 mol% of *o*-quinone in mesitylene (1.0 mL, 0.2 mmol scale) at 160 °C. **2ab.**<sup>[27]</sup> White solid, 51.6 mg, 83% yield.  $^1\text{H}$  NMR (400 MHz,  $\text{CDCl}_3$ ):  $\delta$  = 7.95 (d,  $J$  = 7.9 Hz, 1H), 7.52 – 7.43 (m, 8H), 7.42 – 7.36 (m, 3H), 7.34 – 7.26 (m, 2H), 6.12 – 5.99 (m, 1H), 5.29 (dd,  $J$  = 10.4, 1.1 Hz, 1H), 5.12 (dd,  $J$  = 17.1, 1.1 Hz, 1H), 4.81 – 4.72 (m, 2H).  $^{13}\text{C}$  NMR (100 MHz,  $\text{CDCl}_3$ ):  $\delta$  = 137.5, 136.8, 135.1, 133.7, 131.8, 131.0, 129.8, 128.3, 128.12, 128.1, 127.2, 125.5, 122.2, 120.3, 119.7, 116.6, 115.4, 110.3, 46.4. IR (thin film):  $\nu_{\text{max}}$  ( $\text{cm}^{-1}$ ) = 3058, 2921, 1602, 1461, 1363, 1215, 743 700; HRMS (ESI) calcd for  $\text{C}_{23}\text{H}_{19}\text{NNa}$   $[\text{M}+\text{Na}]^+$ : 332.1415. Found: 332.1412.

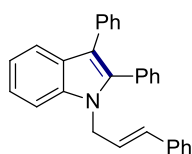



**2ac.** White solid, 32.7 mg, 85% yield, mp 76.2-76.5 °C.  $^1\text{H}$  NMR (400 MHz,  $\text{CDCl}_3$ ):  $\delta$  = 7.93 (d,  $J$  = 7.8 Hz, 1H), 7.54 (d,  $J$  = 8.1 Hz, 1H), 7.47 – 7.42 (m, 7H), 7.40 – 7.34 (m, 7H), 7.32 – 7.23 (m, 3H), 6.43 (d,  $J$  = 16.1 Hz, 1H), 6.37 (dt,  $J$  = 15.9, 4.3 Hz, 1H), 4.90 (d,  $J$  = 4.1 Hz, 2H).  $^{13}\text{C}$  NMR (100 MHz,  $\text{CDCl}_3$ ):  $\delta$  = 137.6, 136.9, 136.4, 135.1, 131.9, 131.6, 131.1, 129.8, 128.5, 128.4, 128.1, 127.7, 127.3, 126.4, 125.5, 125.3, 122.3, 120.4, 119.7, 115.5, 110.3, 46.1. IR (thin film):  $\nu_{\text{max}}$  ( $\text{cm}^{-1}$ ) = 3058, 2924, 2853, 1602, 1461, 1362, 1264, 966, 741, 700; HRMS (ESI) calcd for  $\text{C}_{29}\text{H}_{23}\text{NNa}$  [ $\text{M}+\text{Na}$ ] $^+$ : 408.1723. Found: 408.1728.

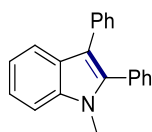

In lieu of the standard conditions, the reaction was performed with 30 mol% of  $\text{Mo}(\text{CO})_6$  and 30 mol% of *o*-quinone in mesitylene (1.0 mL, 0.2 mmol scale) at 160 °C. **2ad.**<sup>[28]</sup> White solid, 46.4 mg, 82% yield.  $^1\text{H}$  NMR (400 MHz,  $\text{CDCl}_3$ ):  $\delta$  = 7.92 – 7.89 (m, 1H), 7.53 – 7.33 (m, 11H), 7.32 – 7.24 (m, 2H), 3.75 (s, 3H).  $^{13}\text{C}$  NMR (100 MHz,  $\text{CDCl}_3$ ):  $\delta$  = 137.7, 137.3, 135.2, 131.9, 131.1, 129.8, 128.4, 128.1, 128.0, 127.0, 125.5, 122.2, 120.2, 119.6, 115.1, 109.5, 30.9.

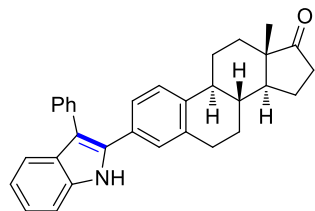

In lieu of the standard conditions, the reaction was performed with 30 mol% of  $\text{Mo}(\text{CO})_6$  and 30 mol% of *o*-quinone in mesitylene (1.0 mL, 0.05 mmol scale) at 180 °C. **2ak.** White solid, 20.1 mg, 90% yield, mp 145.4-147.3 °C.  $^1\text{H}$  NMR (500 MHz,  $\text{CDCl}_3$ ):  $\delta$  = 8.32 (s, 1H), 7.71 (d,  $J$  = 7.6 Hz, 1H), 7.50 (d,  $J$  = 6.8 Hz, 2H), 7.46 – 7.41 (m, 3H), 7.36 – 7.31 (m, 1H), 7.29 – 7.17 (m, 5H), 2.88 – 2.87 (m, 2H), 2.57 – 2.52 (m, 1H), 2.42 – 2.33 (m, 2H), 2.23 – 2.14 (m, 1H), 2.13 – 1.95 (m, 3H), 1.73 – 1.45 (m, 6H), 0.95 (s, 3H).  $^{13}\text{C}$  NMR (125 MHz,  $\text{CDCl}_3$ ):  $\delta$  = 220.7, 139.3, 136.8, 135.8, 135.2, 134.0, 130.2, 130.1, 128.9, 128.4, 128.2, 126.1, 125.6, 125.57, 122.5, 120.3, 119.5, 114.7, 110.8, 50.5, 47.9, 44.4, 38.0, 35.8, 31.5, 29.3, 26.4, 25.6, 21.5, 13.8. IR (thin film):  $\nu_{\text{max}}$  ( $\text{cm}^{-1}$ ) = 3354, 2926, 2855, 1732, 1456, 1250, 742, 701; HRMS (ESI) calcd for  $\text{C}_{32}\text{H}_{32}\text{NO}$  [ $\text{M}+\text{H}$ ] $^+$ : 446.2484. Found: 446.2471.

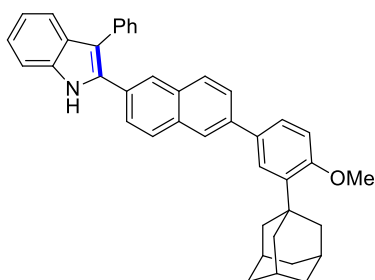

In lieu of the standard conditions, the reaction was performed with 30 mol% of  $\text{Mo}(\text{CO})_6$  and 30 mol% of *o*-quinone,  $\text{PCy}_3$  (2.4 equiv) in mesitylene/dioxane (1/1, 1.0 mL, 0.05 mmol scale) at 180 °C. **2al**. White solid, 26.3 mg, 94% yield, mp 260.0-263.3 °C.  $^1\text{H}$  NMR (400 MHz,  $\text{CDCl}_3$ ):  $\delta$  = 8.35 (s, 1H), 7.95 (s, 2H), 7.83 – 7.73 (m, 4H), 7.60 (d,  $J$  = 2.0 Hz, 1H), 7.54 – 7.46 (m, 5H), 7.40 (t,  $J$  = 7.4 Hz, 2H), 7.35 – 7.26 (m, 2H), 7.20 (t,  $J$  = 7.4 Hz, 1H), 7.00 (d,  $J$  = 8.4 Hz, 1H), 3.91 (s, 3H), 2.21 (s, 6H), 2.13 (s, 3H), 1.83 (s, 6H).  $^{13}\text{C}$  NMR (100 MHz,  $\text{CDCl}_3$ ):  $\delta$  = 158.6, 139.4, 138.9, 136.1, 135.0, 134.2, 133.0, 132.9, 132.2, 130.2, 129.9, 128.8, 128.5, 128.3, 128.25, 126.7, 126.3, 125.9, 125.5, 124.8, 122.8, 120.5, 119.7, 115.4, 112.1, 110.9, 55.1, 40.6, 37.2, 37.1, 29.1. IR (thin film):  $\nu_{\text{max}}$  ( $\text{cm}^{-1}$ ) = 3407, 2904, 2850, 1603, 1489, 1238, 1029, 742, 701; HRMS (ESI) calcd for  $\text{C}_{41}\text{H}_{38}\text{NO}$  [ $\text{M}+\text{H}$ ] $^+$ : 560.2953. Found: 560.2936.

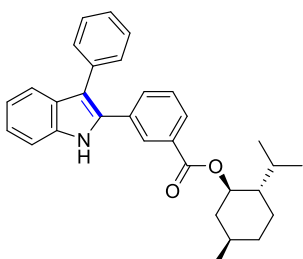

In lieu of the standard conditions, the reaction was performed with 30 mol% of  $\text{Mo}(\text{CO})_6$  and 30 mol% of *o*-quinone,  $\text{PCy}_3$  (2.4 equiv) in mesitylene/dioxane (1/1, 1.0 mL, 0.05 mmol scale) at 180 °C. **2am**. White solid, 22.0 mg, 98% yield, mp 126.1-128.0 °C.  $^1\text{H}$  NMR (400 MHz,  $\text{CDCl}_3$ ):  $\delta$  = 8.42 (s, 1H), 8.19 – 8.15 (m, 1H), 7.96 – 7.94 (m, 1H), 7.68 (d,  $J$  = 8.0 Hz, 1H), 7.56 – 7.54 (m, 1H), 7.48 – 7.24 (m, 8H), 7.17 (t,  $J$  = 7.5 Hz, 1H), 4.93 (td,  $J$  = 10.9, 4.4 Hz, 1H), 2.10 – 2.07 (m, 1H), 1.94 – 1.83 (m, 1H), 1.75 – 1.72 (m, 2H), 1.59 – 1.45 (m, 2H), 1.18 – 1.01 (m, 2H), 0.98 – 0.88 (m, 7H), 0.78 (d,  $J$  = 6.9 Hz, 3H).  $^{13}\text{C}$  NMR (100 MHz,  $\text{CDCl}_3$ ):  $\delta$  = 165.8, 136.0, 134.8, 132.9, 132.88, 132.5, 131.4, 130.2, 128.7, 128.67, 128.63, 128.61, 128.56, 126.5, 123.0, 120.5, 119.8, 115.8, 111.0, 75.1, 47.1, 40.9, 34.3, 31.4, 26.4, 23.5, 22.0, 20.8, 16.4. IR (thin film):  $\nu_{\text{max}}$

( $\text{cm}^{-1}$ ) = 3345, 2956, 2925, 1714, 1694, 1289, 1275, 742; HRMS (ESI) calcd for  $\text{C}_{31}\text{H}_{33}\text{NNaO}_2$   $[\text{M}+\text{Na}]^+$ : 474.2409. Found: 474.2408.

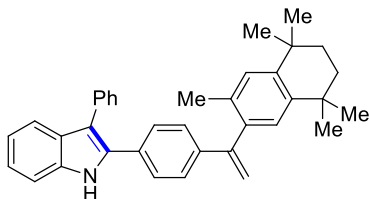

**2an.** White solid, 40.2 mg, 81% yield, mp 134.0-134.6 °C.  $^1\text{H}$  NMR (400 MHz,  $\text{CDCl}_3$ ):  $\delta$  = 8.26 (s, 1H), 7.70 (d,  $J$  = 7.9 Hz, 1H), 7.50 – 7.45 (m, 3H), 7.43 – 7.38 (m, 4H), 7.32 – 7.25 (m, 4H), 7.21 – 7.16 (m, 2H), 7.12 (s, 1H), 5.80 (s, 1H), 5.26 (s, 1H), 2.03 (s, 3H), 1.74 (s, 4H), 1.35 (s, 6H), 1.31 (s, 6H).  $^{13}\text{C}$  NMR (100 MHz,  $\text{CDCl}_3$ ):  $\delta$  = 149.2, 144.1, 142.2, 140.2, 138.4, 135.9, 135.1, 133.8, 132.8, 131.6, 130.2, 128.9, 128.5, 128.1, 127.9, 127.8, 126.9, 126.2, 122.7, 120.4, 119.7, 115.2, 114.9, 110.8, 35.23, 35.22, 34.0, 33.9, 31.9, 31.89, 19.9. IR (thin film):  $\nu_{\text{max}}$  ( $\text{cm}^{-1}$ ) = 3411, 2957, 2925, 1602, 1456, 849, 773, 701; HRMS (ESI) calcd for  $\text{C}_{37}\text{H}_{38}\text{N}$   $[\text{M}+\text{H}]^+$ : 496.3004. Found: 496.2984.

#### 10. Procedure for the gram-scale reaction of substrate 1a.

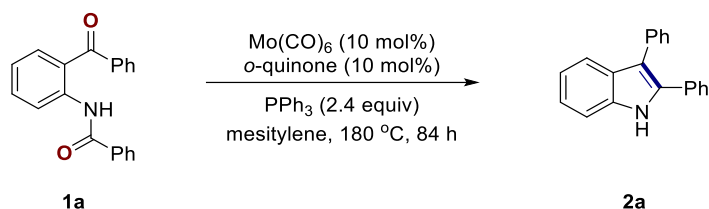

To a Young Schlenk tube (100 mL) was added  $\text{Mo}(\text{CO})_6$  (132.0 mg, 0.5 mmol, 10 mol%), 3,5-di-*tert*-butyl-*o*-benzoquinone (110.0 mg, 0.5 mmol, 10 mol%), and mesitylene (20 mL) under argon. The tube was sealed and the reaction mixture was stirred at 160 °C for 15 min. After cooling to rt, compound **1a** (1.51 g, 5.0 mmol, 1.0 equiv) and  $\text{PPh}_3$  (3.15 g, 12.0 mmol, 2.4 equiv) were added to the reaction mixture under argon. The tube was sealed and the reaction mixture was stirred at 180 °C for 84 h (**Caution**: a protective shield should be installed around the Young Schlenk tube when the reaction was carried out in big scale because of the risk of explosion due to CO release). After the reaction was complete (monitored by TLC), the mixture was cooled to rt, and passed through a short pad of silica gel (DCM/EtOAc = 1:1). The solvents were evaporated under reduced pressure to give the crude mixture, which was purified by

flash column chromatography on silica gel (petroleum ether/*tert*-butyl methyl ether = 80:1 to 40:1) to afford the compound **2a** as a white solid (1.21 g, 90% yield).

### 11. Representative procedure for the Mo-catalyzed carbonyl-carbonyl olefination reaction for the syntheses of benzofurans **2**.

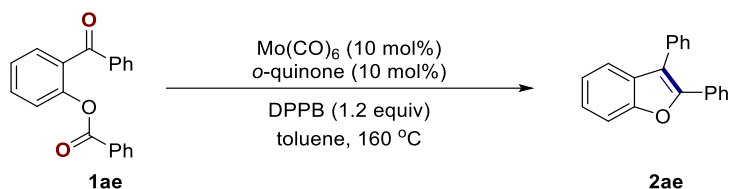

**Preparation of compound 2ae.** In a glovebox,  $\text{Mo}(\text{CO})_6$  (5.3 mg, 0.02 mmol, 10 mol%), 3,5-di-*tert*-butyl-*o*-benzoquinone (4.4 mg, 0.02 mmol, 10 mol%) and toluene (1.0 mL) were added to a Young Schlenk tube (10 mL) equipped with a stirring bar. The tube was sealed and transferred out of the glovebox and the mixture was stirred at 160 °C for 15 min. After cooling to ambient temperature, the tube was transferred to the glovebox and compound **1ae** (60.4 mg, 0.2 mmol, 1.0 equiv), DPPB (102.2 mg, 0.24 mmol, 1.2 equiv) and toluene (1.0 mL) were added to the reaction mixture. Then, the tube was sealed and transferred out of the glovebox and the mixture was stirred at 160 °C until the reaction was complete (monitored by TLC). The reaction mixture was cooled to rt, and concentrated under reduced pressure to give the crude mixture, which was purified by flash column chromatography on silica gel (petroleum ether) to give compound **2ae**<sup>[29]</sup> as a white solid (52.4 mg, 97% yield). <sup>1</sup>H NMR (400 MHz,  $\text{CDCl}_3$ ):  $\delta$  = 7.73 – 7.70 (m, 2H), 7.61 (d,  $J$  = 8.2 Hz, 1H), 7.57 – 7.50 (m, 5H), 7.47 – 7.45 (m, 1H), 7.40 – 7.33 (m, 4H), 7.31 – 7.27 (m, 1H). <sup>13</sup>C NMR (100 MHz,  $\text{CDCl}_3$ ):  $\delta$  = 154.0, 150.5, 132.8, 130.6, 130.2, 129.8, 129.0, 128.4, 128.3, 127.6, 127.0, 124.7, 122.9, 120.0, 117.5, 111.1.

The following compounds **2af–2aj** were prepared analogously.

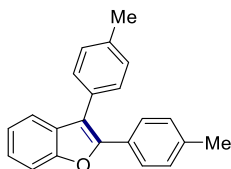

**2af.**<sup>[29]</sup> Colorless oil, 55.0 mg, 92% yield. <sup>1</sup>H NMR (400 MHz,  $\text{CDCl}_3$ ):  $\delta$  = 7.65 (d,  $J$  = 8.2 Hz, 2H), 7.61 (d,  $J$  = 8.1 Hz, 1H), 7.58 – 7.56 (m, 1H), 7.50 – 7.45 (m, 2H), 7.40 – 7.28 (m, 4H), 7.20 (d,  $J$  = 8.0 Hz, 2H), 2.51 (s, 3H), 2.42 (s, 3H). <sup>13</sup>C NMR (100 MHz,  $\text{CDCl}_3$ ):  $\delta$  = 153.9, 150.6, 138.2, 137.2, 130.4, 129.9, 129.63, 129.6, 129.1, 128.0, 126.9, 124.4, 122.7, 119.9, 116.7, 111.0, 21.3.

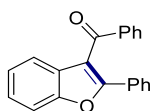

In lieu of the standard conditions, the reaction was performed with 2.4 equiv of  $\text{PPh}_3$  instead of DPPB in toluene at  $160\text{ }^\circ\text{C}$ . **2ag**.<sup>[30]</sup> Yellow solid, 44.5 mg, 75% yield.  $^1\text{H}$  NMR (400 MHz,  $\text{CDCl}_3$ ):  $\delta = 7.87$  (d,  $J = 7.7$  Hz, 2H), 7.72 – 7.70 (m, 2H), 7.66 – 7.55 (m, 2H), 7.51 (t,  $J = 7.3$  Hz, 1H), 7.43 – 7.24 (m, 7H).  $^{13}\text{C}$  NMR (100 MHz,  $\text{CDCl}_3$ ):  $\delta = 192.4, 157.7, 153.8, 137.8, 133.1, 129.8, 129.7, 129.4, 128.44, 128.4, 128.38, 125.3, 123.8, 121.5, 116.1, 111.2$ .

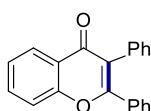

**2ag**.<sup>[31]</sup> Minor isomer. Yellow solid, 7.0 mg, 11% yield.  $^1\text{H}$  NMR (400 MHz,  $\text{CDCl}_3$ ):  $\delta = 8.33$  (d,  $J = 7.0$  Hz, 1H), 7.74 (t,  $J = 7.2$  Hz, 1H), 7.57 (d,  $J = 8.4$  Hz, 1H), 7.48 – 7.24 (m, 11H).  $^{13}\text{C}$  NMR (100 MHz,  $\text{CDCl}_3$ ):  $\delta = 177.3, 161.5, 156.1, 133.7, 133.3, 132.8, 131.2, 130.1, 129.6, 128.3, 128.1, 127.6, 126.4, 125.1, 123.5, 123.0, 118.0$ .

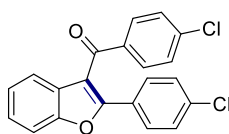

In lieu of the standard conditions, the reaction was performed with 2.4 equiv of  $\text{PPh}_3$  in toluene at  $160\text{ }^\circ\text{C}$ . **2ah**. White solid, 31.6 mg, 67% yield, mp  $158.0\text{--}158.7\text{ }^\circ\text{C}$ .  $^1\text{H}$  NMR (400 MHz,  $\text{CDCl}_3$ ):  $\delta = 7.83\text{--}7.76$  (m, 2H), 7.69 – 7.64 (m, 2H), 7.60 – 7.58 (m, 1H), 7.49 – 7.43 (m, 1H), 7.41 – 7.28 (m, 5H), 7.27 – 7.25 (m, 1H).  $^{13}\text{C}$  NMR (100 MHz,  $\text{CDCl}_3$ ):  $\delta = 190.7, 156.3, 153.8, 139.9, 136.1, 136.0, 131.2, 129.5, 128.92, 128.85, 128.1, 127.7, 125.7, 124.1, 121.4, 116.2, 111.3$ . IR (thin film):  $\nu_{\text{max}}$  ( $\text{cm}^{-1}$ ) = 2920, 2850, 1747, 1671, 1587, 1488, 1453, 1402, 1255, 1193, 1173, 1091, 1054, 1013, 751; HRMS (ESI) calcd for  $\text{C}_{21}\text{H}_{12}\text{Cl}_2\text{O}_2\text{Na}$   $[\text{M}+\text{Na}]^+$ : 389.0107. Found: 389.0108.

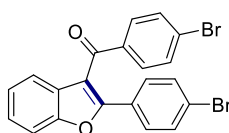

In lieu of the standard conditions, the reaction was performed with 2.4 equiv of  $\text{PPh}_3$  in toluene at  $160\text{ }^\circ\text{C}$ . **2ai**.<sup>[32]</sup> White solid, 56.0 mg, 62% yield.  $^1\text{H}$  NMR (400 MHz,  $\text{CDCl}_3$ ):  $\delta = 7.75\text{--}7.68$  (m, 2H), 7.63 – 7.57 (m, 3H), 7.56 – 7.51 (m, 2H), 7.50 – 7.44 (m, 3H), 7.43 – 7.39 (m,

1H), 7.29 – 7.24 (m, 1H). <sup>13</sup>C NMR (100 MHz, CDCl<sub>3</sub>): δ = 190.9, 156.3, 153.8, 136.4, 131.9, 131.8, 131.3, 129.7, 128.7, 128.2, 128.1, 125.8, 124.5, 124.1, 121.4, 116.2, 111.4.

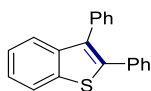

In lieu of the standard conditions, the reaction was performed on 0.1 mmol scale. **2aj**.<sup>[33]</sup> White solid, 21.0 mg, 75% yield. <sup>1</sup>H NMR (400 MHz, CDCl<sub>3</sub>): δ = 7.96 – 7.86 (m, 1H), 7.67 – 7.57 (m, 1H), 7.46 – 7.33 (m, 9H), 7.29 – 7.27 (m, 3H). <sup>13</sup>C NMR (100 MHz, CDCl<sub>3</sub>): δ = 140.9, 139.6, 138.9, 135.6, 134.3, 133.3, 130.5, 129.6, 128.6, 128.3, 127.7, 127.4, 124.5, 124.4, 123.4, 122.1.

## 12. Procedure for the gram-scale reaction of substrate 1ae.

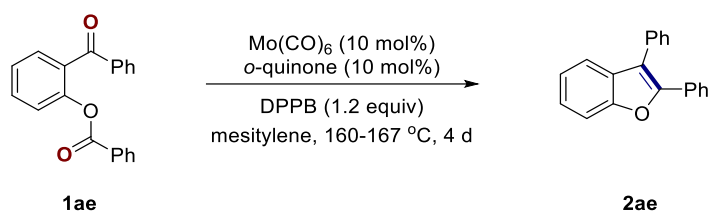

In a glovebox, Mo(CO)<sub>6</sub> (87.1 mg, 0.33 mmol, 10 mol %), 3,5-di-*tert*-butyl-*o*-benzoquinone (72.6 mg, 0.33 mmol, 10 mol %) and mesitylene (10 mL) were added to a Young Schlenk tube (100 mL) equipped with a stirring bar. The tube was sealed and transferred out of the glovebox and the mixture was stirred at 160 °C for 15 min. After cooling to ambient temperature, the tube was transferred to the glovebox and compound **1ae** (1.0 g, 3.31 mmol, 1.0 equiv), DPPB (1.7 g, 3.98 mmol, 1.2 equiv) and mesitylene (15 mL) were added to the reaction mixture. Then, the tube was sealed and transferred out of the glovebox and the mixture was stirred at 160 °C for 2 days and at 167 °C for another 2 days (**Caution**: a protective shield should be installed around the Young Schlenk tube when the reaction was carried out in big scale because of the risk of explosion due to CO release). Then the reaction mixture was cooled to rt, and concentrated under reduced pressure to give the crude mixture, which was purified by flash column chromatography on silica gel (petroleum ether) to give compound **2ae** as a white solid (831 mg, 93% yield).

## 13. Procedure for the syntheses of compounds 2b, P2 and P3.

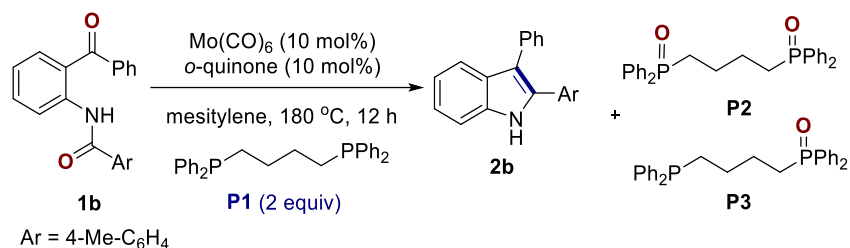

To an oven-dried Young Schlenk tube (10 mL) were added Mo(CO)<sub>6</sub> (2.7 mg, 0.01 mmol, 10 mol%), 3,5-di-*tert*-butyl-*o*-benzoquinone (2.2 mg, 0.01 mmol, 10 mol%), and mesitylene (0.5 mL) under argon. The tube was sealed and the reaction mixture was stirred at 160 °C for 15 min. After cooling to ambient temperature, compound **1b** (31.5 mg, 0.1 mmol, 1.0 equiv) and DPPB (85.3 mg, 0.2 mmol, 2.0 equiv) were added to the reaction mixture under argon. The tube was sealed and the reaction mixture was stirred at 180 °C for 12 h. After the reaction was complete (monitored by TLC), the reaction mixture was cooled to rt, and concentrated under reduced pressure to give the crude residue, which was purified by flash column chromatography on silica gel (petroleum ether/*tert*-butyl methyl ether = 60:1 to 40:1) to afford the title compounds **2b** as a colorless oil (26.1 mg, 92% yield). Diphosphine monoxide **P3** was obtained as a white solid (26.5 mg, 60% yield) when the eluent was switched to petroleum ether/ethyl acetate = 1:1. Diphosphine oxide **P2** was obtained as a white solid (28.0 mg, 61% yield) when the eluent was switched to petroleum ether/ethyl acetate/methanol = 2:2:1.

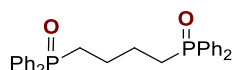

**P2.**<sup>[34]</sup> White solid, 28.0 mg, 61% yield. <sup>1</sup>H NMR (400 MHz, CDCl<sub>3</sub>): δ = 7.72 – 7.62 (m, 8H), 7.51 – 7.34 (m, 12H), 2.35 – 2.14 (m, 4H), 1.78 – 1.60 (m, 4H). <sup>31</sup>P NMR (202 MHz, CDCl<sub>3</sub>): δ = 31.9.

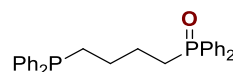

**P3.**<sup>[35]</sup> White solid, 26.5 mg, 60% yield. <sup>1</sup>H NMR (400 MHz, CDCl<sub>3</sub>): δ = 7.89 – 7.18 (m, 20H), 2.28 – 2.18 (m, 2H), 2.06 – 1.97 (m, 2H), 1.78 – 1.66 (m, 2H), 1.58 – 1.46 (m, 2H). <sup>31</sup>P NMR (202 MHz, CDCl<sub>3</sub>): δ = 31.7, –16.8.

#### 14. Representative procedure for the Mo-catalyzed carbonyl-carbonyl olefination reaction for the syntheses of coumarin derivatives 7.

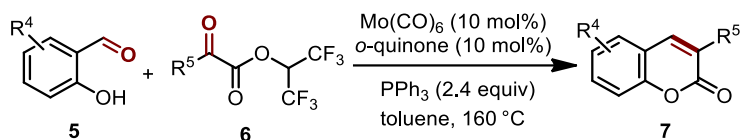

To a Young Schlenk tube (10 mL) were added  $\text{Mo}(\text{CO})_6$  (5.3 mg, 0.02 mmol, 10 mol%), 3,5-di-*tert*-butyl-*o*-benzoquinone (4.4 mg, 0.02 mmol, 10 mol%), and toluene (1.0 mL) under  $\text{N}_2$  atmosphere. The tube was sealed and the reaction mixture was stirred at 160 °C for 15 min. After cooling to ambient temperature, compound **5** (0.2 mmol, 1.0 equiv), compound **6** (0.3 mmol, 1.5 equiv), and  $\text{PPh}_3$  (125.9 mg, 0.48 mmol, 2.4 equiv) were added to the reaction mixture under  $\text{N}_2$  atmosphere. The tube was sealed and the reaction mixture was stirred at 160 °C. After the reaction was complete (monitored by TLC), the reaction mixture was cooled to rt. The solvents were evaporated under reduced pressure to give the crude mixture, which was purified by flash column chromatography on silica gel to afford the coumarin derivatives **7**.

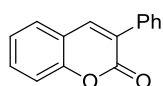

**7a.**<sup>[36]</sup> White solid, 31.2 mg, 70% yield.  $^1\text{H}$  NMR (400 MHz,  $\text{CDCl}_3$ ):  $\delta$  = 7.81 (s, 1H), 7.73 – 7.68 (m, 2H), 7.57 – 7.50 (m, 2H), 7.48 – 7.38 (m, 3H), 7.38 – 7.35 (m, 1H), 7.30 (td,  $J$  = 7.5, 1.1 Hz, 1H).  $^{13}\text{C}$  NMR (100 MHz,  $\text{CDCl}_3$ ):  $\delta$  = 160.5, 153.5, 139.8, 134.7, 131.4, 128.8, 128.5, 128.44, 128.36, 127.9, 124.5, 119.7, 116.4.

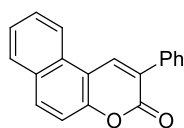

**7b.**<sup>[36]</sup> White solid, 47.9 mg, 88% yield.  $^1\text{H}$  NMR (400 MHz,  $\text{CDCl}_3$ ):  $\delta$  = 8.56 (s, 1H), 8.29 (d,  $J$  = 8.3 Hz, 1H), 7.97 (d,  $J$  = 9.0 Hz, 1H), 7.92 (d,  $J$  = 8.1 Hz, 1H), 7.84 – 7.77 (m, 2H), 7.69 (ddd,  $J$  = 8.4, 7.0, 1.3 Hz, 1H), 7.57 (ddd,  $J$  = 8.0, 7.0, 1.1 Hz, 1H), 7.54 – 7.41 (m, 4H).  $^{13}\text{C}$  NMR (100 MHz,  $\text{CDCl}_3$ ):  $\delta$  = 160.6, 153.2, 135.7, 135.1, 132.7, 130.4, 129.14, 129.10, 128.9, 128.59, 128.55, 128.2, 127.3, 126.0, 121.4, 116.7, 113.8.

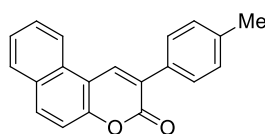



**7c.**<sup>[37]</sup> Yellow solid, 54.4 mg, 95% yield. <sup>1</sup>H NMR (400 MHz, CDCl<sub>3</sub>): δ = 8.50 (s, 1H), 8.25 (d, *J* = 8.4 Hz, 1H), 7.93 (d, *J* = 9.0 Hz, 1H), 7.89 (d, *J* = 8.1 Hz, 1H), 7.74 – 7.63 (m, 3H), 7.55 (t, *J* = 7.5 Hz, 1H), 7.45 (d, *J* = 9.0 Hz, 1H), 7.29 (d, *J* = 7.9 Hz, 2H), 2.42 (s, 3H). <sup>13</sup>C NMR (100 MHz, CDCl<sub>3</sub>): δ = 160.6, 152.9, 138.8, 134.9, 132.4, 132.1, 130.2, 129.2, 129.0, 128.4, 128.0, 127.0, 125.9, 121.4, 116.6, 113.7, 21.3.

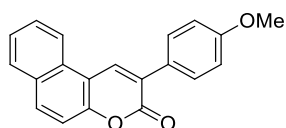

**7d.**<sup>[37]</sup> Yellow solid, 58.6 mg, 97% yield. <sup>1</sup>H NMR (400 MHz, CDCl<sub>3</sub>): δ = 8.44 (s, 1H), 8.24 (d, *J* = 8.4 Hz, 1H), 7.90 (d, *J* = 9.0 Hz, 1H), 7.87 (d, *J* = 8.2 Hz, 1H), 7.79 – 7.71 (m, 2H), 7.65 (td, *J* = 8.2, 1.1 Hz, 1H), 7.55 – 6.52 (m, 1H), 7.42 (d, *J* = 9.0 Hz, 1H), 7.03 – 6.95 (m, 2H), 3.85 (s, 3H). <sup>13</sup>C NMR (100 MHz, CDCl<sub>3</sub>): δ = 160.7, 160.1, 152.6, 134.1, 132.1, 130.2, 129.8, 128.9, 128.0, 127.3, 126.6, 125.9, 121.3, 116.5, 113.9, 113.7, 55.3.

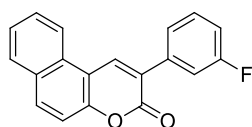

**7e.** Yellow solid, 36.0 mg, 62% yield, mp 174.8-176.0 °C. <sup>1</sup>H NMR (400 MHz, CDCl<sub>3</sub>): δ = 8.58 (s, 1H), 8.28 (d, *J* = 8.4 Hz, 1H), 7.99 (d, *J* = 9.0 Hz, 1H), 7.92 (d, *J* = 8.1 Hz, 1H), 7.70 (td, *J* = 8.2, 1.1 Hz, 1H), 7.62 – 7.53 (m, 3H), 7.52 – 7.40 (m, 2H), 7.13 (td, *J* = 8.4, 1.8 Hz, 1H). <sup>13</sup>C NMR (100 MHz, CDCl<sub>3</sub>): δ = 162.7 (d, *J* = 246.0 Hz), 160.2, 153.3, 137.0 (d, *J* = 8.2 Hz), 136.1, 133.1, 130.0 (d, *J* = 8.4 Hz), 130.0, 129.1, 129.0, 128.3, 126.1, 125.8 (d, *J* = 1.9 Hz), 124.2 (d, *J* = 2.7 Hz), 121.3, 116.6, 115.73 (d, *J* = 21.1 Hz), 115.7 (d, *J* = 23.0 Hz), 113.5. <sup>19</sup>F NMR (376 MHz, CDCl<sub>3</sub>) δ = -113.4. IR (thin film): ν<sub>max</sub> (cm<sup>-1</sup>) = 2928, 1724, 1581, 1444, 1267, 1072, 746; HRMS (ESI) calcd for C<sub>19</sub>H<sub>11</sub>FNaO<sub>2</sub> [M+Na]<sup>+</sup>: 313.0635. Found: 313.0635.

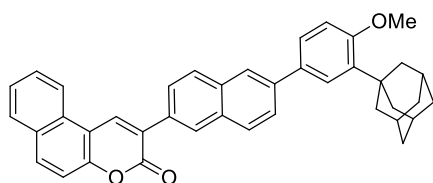

**7f.** Yellow solid, 100.2 mg, 89% yield, mp 206.0-207.2 °C. <sup>1</sup>H NMR (400 MHz, CDCl<sub>3</sub>): δ = 8.62 (s, 1H), 8.38 – 8.23 (m, 2H), 8.02 – 7.84 (m, 6H), 7.77 (d, *J* = 8.3 Hz, 1H), 7.73 – 7.66 (m, 1H), 7.64 (s, 1H), 7.60 – 7.51 (m, 2H), 7.45 (d, *J* = 8.9 Hz, 1H), 6.99 (d, *J* = 8.3 Hz, 1H), 3.91 (s, 3H),

2.24 (s, 6H), 2.15 (s, 3H), 1.85 (s, 6H).  $^{13}\text{C}$  NMR (100 MHz,  $\text{CDCl}_3$ ):  $\delta$  = 160.6, 158.6, 153.0, 139.6, 138.8, 135.5, 133.6, 132.7, 132.5, 131.9, 130.2, 129.0, 128.99, 128.8, 128.12, 128.1, 127.8, 126.8, 126.1, 126.0, 125.9, 125.7, 125.5, 124.5, 121.5, 116.5, 113.8, 112.1, 55.1, 40.6, 37.2, 37.1, 29.1. IR (thin film):  $\nu_{\text{max}}$  ( $\text{cm}^{-1}$ ) = 2903, 2848, 1724, 1569, 1493, 1463, 1237, 1101, 1029, 811, 734; HRMS (ESI) calcd for  $\text{C}_{40}\text{H}_{34}\text{NaO}_3$   $[\text{M}+\text{Na}]^+$ : 585.2400. Found: 585.2395.

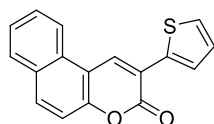

**7g.**<sup>[37]</sup> Pale yellow solid, 39.7 mg, 71% yield.  $^1\text{H}$  NMR (400 MHz,  $\text{CDCl}_3$ ):  $\delta$  = 8.75 (s, 1H), 8.33 (d,  $J$  = 8.4 Hz, 1H), 7.96 (d,  $J$  = 9.0 Hz, 1H), 7.94 – 7.87 (m, 2H), 7.72 (ddd,  $J$  = 8.3, 7.0, 1.3 Hz, 1H), 7.58 (ddd,  $J$  = 8.0, 7.0, 1.0 Hz, 1H), 7.51 – 7.44 (m, 2H), 7.18 (dd,  $J$  = 5.1, 3.8 Hz, 1H).  $^{13}\text{C}$  NMR (100 MHz,  $\text{CDCl}_3$ ):  $\delta$  = 159.4, 152.3, 136.5, 132.5, 131.3, 130.4, 129.1, 128.9, 128.2, 127.7, 127.1, 126.1, 121.4, 120.8, 116.6, 113.6.

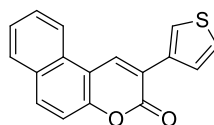

**7h.** Yellow solid, 45.6 mg, 82% yield, mp 207.0-208.0 °C.  $^1\text{H}$  NMR (400 MHz,  $\text{CDCl}_3$ ):  $\delta$  = 8.62 (s, 1H), 8.33 – 8.16 (m, 2H), 7.92 (d,  $J$  = 9.0 Hz, 1H), 7.88 (d,  $J$  = 8.1 Hz, 1H), 7.68 (t,  $J$  = 7.3 Hz, 1H), 7.62 (dd,  $J$  = 5.0, 0.8 Hz, 1H), 7.55 (t,  $J$  = 7.3 Hz, 1H), 7.47 – 7.38 (m, 2H).  $^{13}\text{C}$  NMR (100 MHz,  $\text{CDCl}_3$ ):  $\delta$  = 160.1, 152.4, 134.8, 132.9, 132.4, 130.3, 129.1, 128.9, 128.1, 126.2, 126.0, 125.8, 121.6, 121.3, 116.6, 113.5. IR (thin film):  $\nu_{\text{max}}$  ( $\text{cm}^{-1}$ ) = 2926, 1717, 1465, 1273, 1124, 1072, 798, 744; HRMS (ESI) calcd for  $\text{C}_{17}\text{H}_{10}\text{NaO}_2\text{S}$   $[\text{M}+\text{Na}]^+$ : 301.0294. Found: 301.0291.

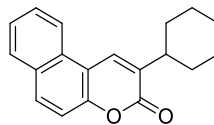

**7i.**<sup>[38]</sup> Yellow solid, 23.4 mg, 42% yield.  $^1\text{H}$  NMR (400 MHz,  $\text{CDCl}_3$ ):  $\delta$  = 8.28 (d,  $J$  = 8.4 Hz, 1H), 8.24 (s, 1H), 7.91 (d,  $J$  = 6.7 Hz, 1H), 7.89 (d,  $J$  = 5.3 Hz, 1H), 7.67 (td,  $J$  = 8.2, 1.1 Hz, 1H), 7.55 (td,  $J$  = 7.8, 0.7 Hz, 1H), 7.45 (d,  $J$  = 9.0 Hz, 1H), 2.94 – 2.82 (m, 1H), 2.06 (d,  $J$  = 11.1 Hz, 2H), 1.92 – 1.80 (m, 3H), 1.53 – 1.38 (m, 4H), 1.37 – 1.28 (m, 1H).  $^{13}\text{C}$  NMR (100 MHz,  $\text{CDCl}_3$ ):  $\delta$  = 161.6, 152.0, 134.0, 131.9, 131.6, 130.3, 128.9, 127.8, 125.7, 121.4, 116.7, 113.5, 38.6, 32.2, 26.5, 26.2.

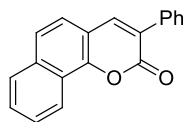

**7j.**<sup>[39]</sup> White solid, 46.6 mg, 86% yield. <sup>1</sup>H NMR (400 MHz, CDCl<sub>3</sub>): δ = 8.63 – 8.57 (m, 1H), 7.95 (s, 1H), 7.92 – 7.85 (m, 1H), 7.81 – 7.75 (m, 2H), 7.70 (d, *J* = 8.5 Hz, 1H), 7.68 – 7.62 (m, 2H), 7.52 (d, *J* = 8.5 Hz, 1H), 7.51 – 7.40 (m, 3H). <sup>13</sup>C NMR (100 MHz, CDCl<sub>3</sub>): δ = 160.6, 150.6, 140.5, 134.8, 134.6, 128.8, 128.53, 128.49, 128.4, 127.8, 127.6, 127.2, 124.5, 123.7, 122.9, 122.3, 115.1.

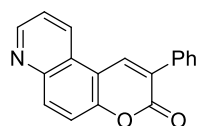

**7k.** Pale yellow solid, 48.4 mg, 89% yield, mp 200.3-202.0 °C. <sup>1</sup>H NMR (400 MHz, CDCl<sub>3</sub>): δ = 8.98 (dd, *J* = 4.2, 1.5 Hz, 1H), 8.61 (d, *J* = 8.4 Hz, 1H), 8.47 (s, 1H), 8.24 (d, *J* = 9.3 Hz, 1H), 7.82 – 7.75 (m, 2H), 7.72 (d, *J* = 9.2 Hz, 1H), 7.59 (dd, *J* = 8.5, 4.2 Hz, 1H), 7.52 – 7.40 (m, 3H). <sup>13</sup>C NMR (100 MHz, CDCl<sub>3</sub>): δ = 160.1, 152.8, 150.0, 145.5, 134.6, 134.5, 133.9, 129.7, 129.1, 128.6, 128.5, 128.1, 124.3, 122.5, 120.2, 113.5. IR (thin film): ν<sub>max</sub> (cm<sup>-1</sup>) = 2927, 1728, 1601, 1468, 1282, 830, 812, 745, 702; HRMS (ESI) calcd for C<sub>18</sub>H<sub>11</sub>NNaO<sub>2</sub> [M+Na]<sup>+</sup>: 296.0682. Found: 296.0685.

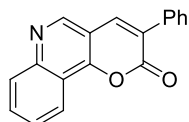

**7l.**<sup>[40]</sup> Pale yellow solid, 25.4 mg, 47% yield. <sup>1</sup>H NMR (400 MHz, CDCl<sub>3</sub>): δ = 9.00 (s, 1H), 8.48 (d, *J* = 8.1 Hz, 1H), 8.14 (d, *J* = 8.2 Hz, 1H), 7.99 (s, 1H), 7.85 (t, *J* = 7.2 Hz, 1H), 7.76 (d, *J* = 6.8 Hz, 2H), 7.70 (t, *J* = 7.4 Hz, 1H), 7.54 – 7.38 (m, 3H). <sup>13</sup>C NMR (100 MHz, CDCl<sub>3</sub>): δ = 159.4, 155.9, 149.0, 148.9, 137.6, 134.1, 131.7, 129.5, 129.3, 128.7, 128.6, 128.4, 127.8, 122.0, 117.6, 111.4.

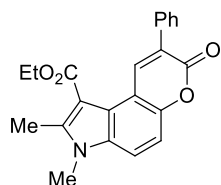

**7m.** Pale yellow solid, 58.1 mg, 80% yield, mp 177.4-178.3 °C. <sup>1</sup>H NMR (400 MHz, CDCl<sub>3</sub>): δ = 9.60 (s, 1H), 7.87 – 7.80 (m, 2H), 7.49 – 7.42 (m, 2H), 7.40 – 7.34 (m, 2H), 7.18 (d, *J* = 8.9 Hz, 1H), 4.41 (q, *J* = 7.1 Hz, 2H), 3.68 (s, 3H), 2.67 (s, 3H), 1.38 (t, *J* = 7.1 Hz, 3H). <sup>13</sup>C NMR (100

MHz, CDCl<sub>3</sub>):  $\delta$  = 165.6, 160.8, 151.1, 145.6, 140.8, 135.7, 133.0, 128.5, 128.3, 128.1, 124.8, 122.1, 112.7, 112.3, 111.4, 106.3, 60.3, 30.1, 14.4, 13.1. IR (thin film):  $\nu_{\max}$  (cm<sup>-1</sup>) = 3087, 2932, 1709, 1588, 1440, 1376, 1287, 1184, 1149, 1098, 960, 787, 704, 619; HRMS (ESI) calcd for C<sub>22</sub>H<sub>19</sub>NNaO<sub>4</sub> [M+Na]<sup>+</sup>: 384.1206. Found: 384.1200.

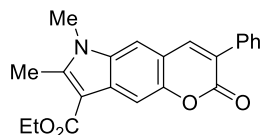

**7n.** Pale yellow solid, 44.8 mg, 62% yield, mp 215.9-217.4 °C. <sup>1</sup>H NMR (400 MHz, CDCl<sub>3</sub>):  $\delta$  = 7.97 (s, 1H), 7.78 (s, 1H), 7.67 (d, *J* = 7.8 Hz, 2H), 7.45 – 7.33 (m, 3H), 7.26 (s, 1H), 4.38 (q, *J* = 7.1 Hz, 2H), 3.70 (s, 3H), 2.75 (s, 3H), 1.46 (t, *J* = 7.1 Hz, 3H). <sup>13</sup>C NMR (100 MHz, CDCl<sub>3</sub>):  $\delta$  = 165.3, 161.2, 149.6, 149.1, 140.5, 135.0, 133.8, 129.2, 128.3, 125.6, 115.0, 107.6, 107.1, 104.4, 59.7, 29.9, 14.5, 12.1. IR (thin film):  $\nu_{\max}$  (cm<sup>-1</sup>) = 2929, 1715, 1630, 1467, 1418, 1178, 1094, 967, 784, 695; HRMS (ESI) calcd for C<sub>22</sub>H<sub>19</sub>NNaO<sub>4</sub> [M+Na]<sup>+</sup>: 384.1206. Found: 384.1208.

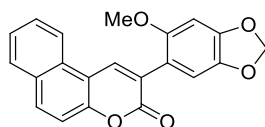

**7o.** Pale yellow solid, 39.5 mg, 57% yield, mp 190.9-192.1 °C. <sup>1</sup>H NMR (400 MHz, CDCl<sub>3</sub>):  $\delta$  = 8.51 (s, 1H), 8.23 (d, *J* = 8.2 Hz, 1H), 7.95 (d, *J* = 8.8 Hz, 1H), 7.90 (d, *J* = 8.0 Hz, 1H), 7.66 (t, *J* = 7.2 Hz, 1H), 7.55 (t, *J* = 7.2 Hz, 1H), 7.47 (d, *J* = 8.9 Hz, 1H), 6.97 (s, 1H), 6.66 (s, 1H), 5.98 (s, 2H), 3.79 (s, 3H). <sup>13</sup>C NMR (100 MHz, CDCl<sub>3</sub>):  $\delta$  = 160.6, 153.1, 153.0, 148.9, 141.3, 137.7, 132.3, 130.3, 129.1, 128.9, 128.0, 125.8, 125.0, 121.5, 116.8, 116.3, 113.6, 110.3, 101.5, 95.5, 56.9. IR (thin film):  $\nu_{\max}$  (cm<sup>-1</sup>) = 2933, 2787, 1718, 1617, 1572, 1508, 1452, 1386, 1282, 1236, 1199, 1150, 1009, 737, 700; HRMS (ESI) calcd for C<sub>21</sub>H<sub>14</sub>NaO<sub>5</sub> [M+Na]<sup>+</sup>: 369.0733. Found: 369.0729.

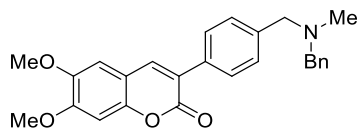

**7p.**<sup>[41]</sup> Viscous yellow oil, 64.5 mg, 78% yield. <sup>1</sup>H NMR (400 MHz, CDCl<sub>3</sub>):  $\delta$  = 7.75 (s, 1H), 7.69 – 7.64 (m, 2H), 7.44 (d, *J* = 8.2 Hz, 2H), 7.40 – 7.36 (m, 2H), 7.35 – 7.30 (m, 2H), 7.27 – 7.23 (m, 1H), 6.91 (s, 1H), 6.87 (s, 1H), 3.96 (s, 3H), 3.93 (s, 3H), 3.57 (s, 2H), 3.56 (s, 2H), 2.22 (s, 3H). <sup>13</sup>C NMR (100 MHz, CDCl<sub>3</sub>):  $\delta$  = 161.0, 152.6, 149.4, 146.4, 139.7, 139.6, 139.1, 133.7, 128.9, 128.2, 127.0, 125.0, 112.3, 107.9, 99.6, 61.8, 61.4, 56.4, 56.3, 42.2. IR (thin film):  $\nu_{\max}$  (cm<sup>-1</sup>) =

2918, 1714, 1578, 1491, 1439, 1370, 1266, 1195, 1042, 1012, 928, 814, 736; HRMS (ESI) calcd for  $C_{26}H_{25}NNaO_4$   $[M+Na]^+$ : 438.1676. Found: 438.1673.

**15. Procedure for the Mo-catalyzed carbonyl-carbonyl olefination reaction for the synthesis of 2-pyrone 10.**

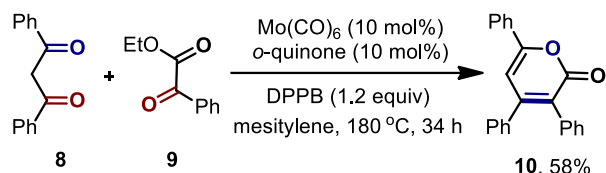

To a Young Schlenk tube (10 mL) were added  $Mo(CO)_6$  (5.3 mg, 0.02 mmol, 10 mol%), 3,5-di-*tert*-butyl-*o*-benzoquinone (4.4 mg, 0.02 mmol, 10 mol%), and mesitylene (1.0 mL) under  $N_2$  atmosphere. The tube was sealed and the reaction mixture was stirred at 160 °C for 15 min. After cooling to ambient temperature, compound **8** (44.8 mg, 0.2 mmol, 1.0 equiv), compound **9** (53.4 mg, 0.3 mmol, 1.5 equiv) and DPPB (102.4 mg, 0.24 mmol, 1.2 equiv) were added to the reaction mixture under  $N_2$  atmosphere. The tube was sealed and the reaction mixture was stirred at 180 °C. After the reaction was complete (monitored by TLC), the reaction mixture was cooled to rt, and passed through a short pad of silica gel (DCM/EtOAc = 1:1). The solvents were evaporated under reduced pressure to give the crude mixture, which was purified by flash column chromatography on silica gel (petroleum ether/ethyl acetate = 60:1 to 30:1) to afford the title compound **10**<sup>[42]</sup> as a yellow solid (37.6 mg, 58% yield).  $^1H$  NMR (400 MHz,  $CDCl_3$ ):  $\delta$  = 8.00 – 7.88 (m, 2H), 7.55 – 7.45 (m, 3H), 7.34 – 7.16 (m, 10H), 6.87 (s, 1H).  $^{13}C$  NMR (100 MHz,  $CDCl_3$ ):  $\delta$  = 162.6, 158.2, 152.6, 137.7, 133.7, 131.3, 130.8, 130.7, 128.9, 128.64, 128.6, 128.3, 127.9, 127.6, 125.5, 123.0, 104.9. IR (thin film):  $\nu_{max}$  ( $cm^{-1}$ ) = 2922, 2852, 1708, 1627, 1532, 1449, 1350, 766, 701; HRMS (ESI) calcd for  $C_{23}H_{16}NaO_2$   $[M+Na]^+$ : 347.1043. Found: 347.1067.

## II. Investigation of other quinones and transition-metal carbonyl complexes.

Table S1. Investigation of other quinones.<sup>a</sup>

| entry | quinone                 | yield <sup>b</sup> (%) | conv. <sup>b</sup> (%) |
|-------|-------------------------|------------------------|------------------------|
| 1     | <b><i>o</i>-quinone</b> | >95                    | >95                    |
| 2     | <b>Q1</b>               | trace                  | 22                     |
| 3     | <b>Q2</b>               | 54                     | 57                     |
| 4     | <b>Q3</b>               | 15                     | 16                     |

<sup>a</sup> Reaction conditions: the reaction was performed with Mo(CO)<sub>6</sub>/quinone, DPPB (2 equiv) on 0.1 mmol scale in mesitylene (0.5 mL) at 180 °C. <sup>b</sup> Yield and conversion were determined by <sup>1</sup>H NMR using CH<sub>2</sub>Br<sub>2</sub> as internal standard.

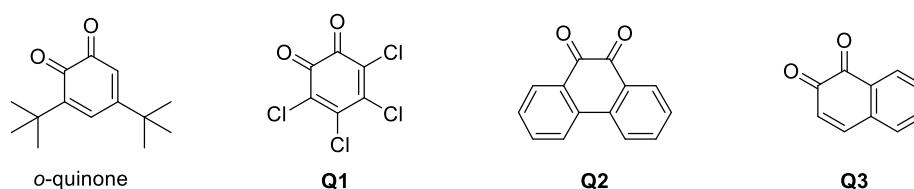

Table S2. Investigation of other transition-metal carbonyl complexes.<sup>a</sup>

| entry | metal                              | x (mol%) | yield <sup>b</sup> (%) |
|-------|------------------------------------|----------|------------------------|
| 1     | Cr(CO) <sub>6</sub>                | 10       | n.r. <sup>c</sup>      |
| 2     | W(CO) <sub>6</sub>                 | 10       | n.r. <sup>c</sup>      |
| 3     | Fe <sub>2</sub> (CO) <sub>9</sub>  | 5        | n.r. <sup>c</sup>      |
| 4     | Ru <sub>3</sub> (CO) <sub>12</sub> | 3.3      | n.r. <sup>c</sup>      |
| 5     | Mn <sub>2</sub> (CO) <sub>10</sub> | 5        | n.r. <sup>c</sup>      |

<sup>a</sup> Reaction conditions: the reaction was performed with metal/*o*-quinone, DPPB (2 equiv) on 0.1 mmol scale in mesitylene (0.5 mL) at 160 °C. <sup>b</sup> Yield was determined by <sup>1</sup>H NMR using CH<sub>2</sub>Br<sub>2</sub> as internal standard. <sup>c</sup> No reaction.

### III. Mechanistic studies.

#### 1. General procedure for the Mo-catalyzed carbonyl-carbonyl olefination reaction of compound **1a** in the presence of radical scavengers.

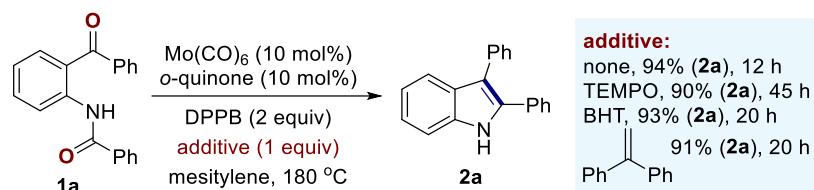

To a Young Schlenk tube (10 mL) were added  $\text{Mo}(\text{CO})_6$  (2.7 mg, 0.01 mmol, 10 mol%), 3,5-di-*tert*-butyl-*o*-benzoquinone (2.2 mg, 0.01 mmol, 10 mol%), and mesitylene (0.5 mL) under  $\text{N}_2$  atmosphere. The tube was sealed and the reaction mixture was stirred at 160 °C for 15 min. After cooling to ambient temperature, compound **1a** (30.1 mg, 0.1 mmol, 1.0 equiv), the corresponding additive (0.1 mmol, 1.0 equiv) and DPPB (85.3 mg, 0.2 mmol, 2.0 equiv) were added to the reaction mixture under  $\text{N}_2$  atmosphere. The tube was sealed and the reaction mixture was stirred at 180 °C. After the reaction was complete (monitored by TLC), the reaction mixture was cooled to rt, and passed through a short pad of silica gel (DCM/EtOAc = 1:1). The solvents were evaporated under reduced pressure to give the crude mixture, which was purified by flash column chromatography on silica gel (petroleum ether/*tert*-butyl methyl ether = 80:1 to 40:1) to afford the title compound **2a** as a white solid.

#### 2. Procedure for the Mo-catalyzed carbonyl-carbonyl olefination reaction of compound **1ao**.

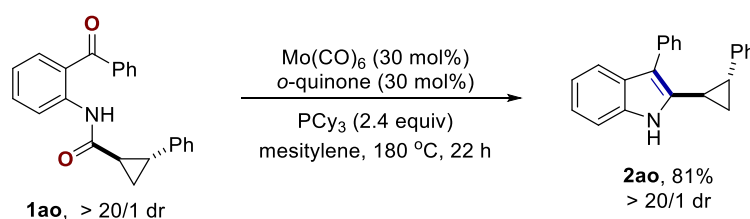

To a Young Schlenk tube (10 mL) were added  $\text{Mo}(\text{CO})_6$  (7.9 mg, 0.03 mmol, 30 mol%), 3,5-di-*tert*-butyl-*o*-benzoquinone (6.6 mg, 0.03 mmol, 30 mol%), and mesitylene (2.0 mL) under  $\text{N}_2$  atmosphere. The tube was sealed and the reaction mixture was stirred at 160 °C for 15 min. After cooling to ambient temperature, compound **1ao** (34.1 mg, 0.1 mmol, 1.0 equiv),  $\text{PCy}_3$  (67.3 mg, 0.24 mmol, 2.4 equiv) were added to the reaction mixture under  $\text{N}_2$  atmosphere. The tube was sealed and the reaction mixture was stirred at 180 °C. After the reaction was complete (monitored by TLC), the reaction mixture was cooled to rt, and passed through a

short pad of silica gel (DCM/EtOAc = 1:1). The solvents were evaporated under reduced pressure to give the crude mixture, which was purified by flash column chromatography on silica gel (petroleum ether/ethyl acetate= 80:1 to 30:1) to afford the title compound **2ao** as a white solid (25.1 mg, 81% yield, mp 114.9-115.5 °C). The relative configuration of product **2ao** was determined by 2D-NMR analysis. For details, see the NMR spectra in Page S-228 to S-235. <sup>1</sup>H NMR (400 MHz, CDCl<sub>3</sub>): δ = 7.91 (s, 1H), 7.79 (d, *J* = 7.8 Hz, 1H), 7.65 (d, *J* = 7.1 Hz, 2H), 7.47 (t, *J* = 7.6 Hz, 2H), 7.42 – 7.33 (m, 4H), 7.31 – 7.25 (m, 2H), 7.22 (t, *J* = 7.5 Hz, 1H), 7.13 (d, *J* = 7.2 Hz, 2H), 2.58 – 2.50 (m, 1H), 2.28 (dt, *J* = 9.1, 5.5 Hz, 1H), 1.50 (dt, *J* = 8.9, 5.6 Hz, 1H), 1.44 (dt, *J* = 8.9, 5.8 Hz, 1H). <sup>13</sup>C NMR (100 MHz, CDCl<sub>3</sub>): δ = 141.2, 135.0, 134.9, 134.87, 129.6, 128.4, 128.37, 127.9, 126.0, 125.8, 125.77, 121.9, 120.2, 118.9, 115.5, 110.5, 26.0, 20.3, 16.7. IR (thin film): ν<sub>max</sub> (cm<sup>-1</sup>) = 3419, 2925, 1603, 1460, 1075, 772, 697; HRMS (ESI) calcd for C<sub>23</sub>H<sub>20</sub>N [M+H]<sup>+</sup>: 310.1590. Found: 310.1587.



#### IV. A proposed reaction pathway for the formation of coumarins.

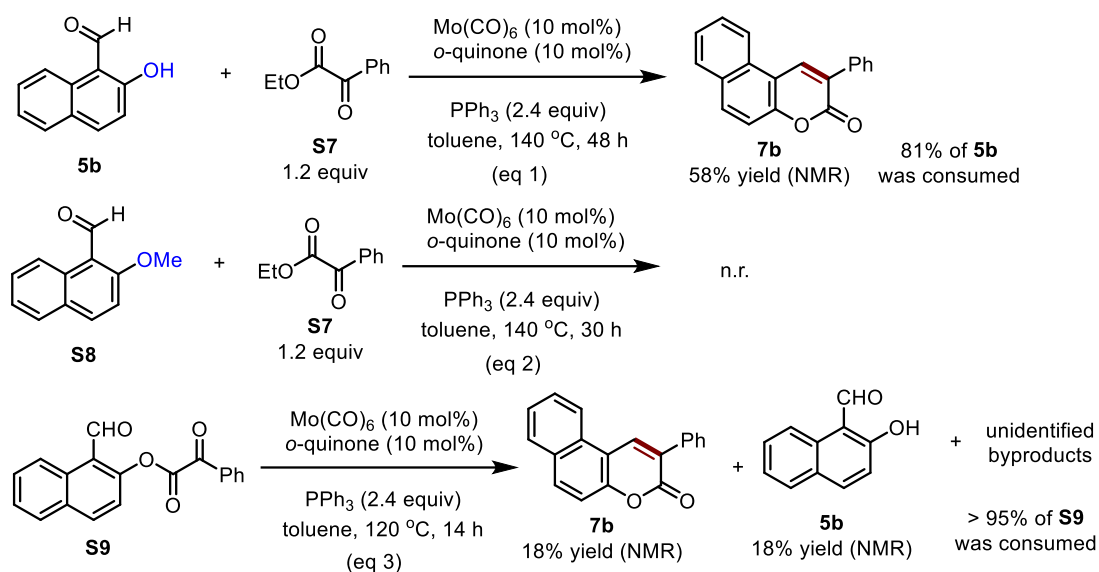

Preliminary mechanistic experiments were performed to gain some insights to the reaction mechanism of the coumarin forming reaction. First, the reaction of ethyl 2-oxo-2-phenylacetate **S7** with O-methyl protected substrate **S8** was performed to probe whether the transesterification or carbonyl-carbonyl olefination occurred first (eq 2). Under the Mo-catalytic conditions, no reaction was occurred while 58% yield of product **7b** could be detected when the 2-hydroxy-1-naphthaldehyde **5b** was used as the substrate (eq 1). In contrast, reaction of transesterification product **S9** which was considered as one of the possible reaction intermediates, proceeded and afforded product **7b** in 18% yield (eq 3). The low yield of this reaction might be due to the low stability of substrate **S9** under the reaction conditions. These experimental results suggested that the coumarin forming reaction might be initiated via the transesterification and followed by the intramolecular carbonyl-carbonyl olefination. Accordingly, a possible reaction pathway was proposed (Scheme S1).

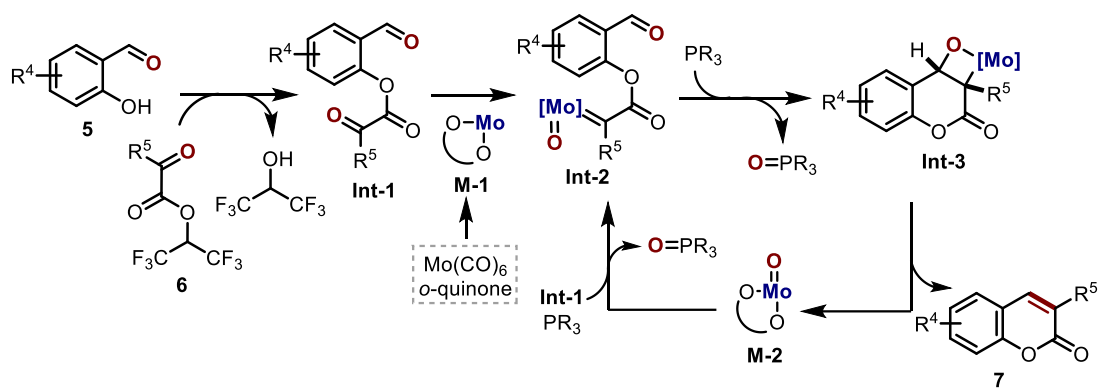

**Scheme S1. Plausible reaction mechanism.**

## V. References.

- [1] A. Whyte, K. I. Burton, J. Zhang and M. Lautens, Enantioselective Intramolecular Copper-Catalyzed Borylacylation, *Angew. Chem. Int. Ed.*, 2018, **57**, 13927–13930.
- [2] W.-T. Wei, J.-F. Sheng, H. Miao, X. Luo, X.-H. Song, M. Yan and Y. Zou, Transition-Metal-Free Synthesis of Acridones via Base-Mediated Intramolecular Oxidative C–H Amination, *Adv. Synth. Catal.*, 2018, **360**, 2101–2106.
- [3] G. Dannhardt, B. L. Fiebich and J. Schweppenhäuser, COX-1/COX-2 inhibitors based on the methanone moiety, *Eur. J. Med. Chem.*, 2002, **37**, 147–161.
- [4] Y. Wu, B. Li, F. Mao, X. Li and F. Y. Kwong, Toluene derivatives as simple coupling precursors for cascade palladium-catalyzed oxidative C–H bond acylation of acetanilides, *Chem. Commun.*, 2013, **49**, 689–691.
- [5] A. Albertia, P. Astolfi, P. Carloni, D. Döppc, L. Greci, C. Rizzoli and P. Stipa, Radical intermediates in the photorearrangement of 3-hydroxyindolic nitrones, *Tetrahedron*, 2011, **67**, 6889–6894.
- [6] A. Verma and S. Kumar, Selective Oxidative Decarbonylative Cleavage of Unstrained C(sp<sup>3</sup>)–C(sp<sup>2</sup>) Bond: Synthesis of Substituted Benzoxazinones, *Org. Lett.*, 2016, **18**, 4388–4391.
- [7] S. S. Bera, M. R. Sk and M. S. Maj, Weakly Coordinating, Ketone-Directed ( $\eta^5$ -Pentamethylcyclopentadienyl)cobalt(III)- and ( $\eta^5$ -Pentamethylcyclopentadienyl)rhodium(III)-Catalyzed C–H Amidation of Arenes: A Route to Acridone Alkaloids, *Chem. Eur. J.*, 2019, **25**, 1806–1811.
- [8] Y. Wu, P. Sun, K. Zhang, T. Yang, H. Yao and A. Lin, Rh(III)-Catalyzed Redox-Neutral Annulation of Primary Benzamides with Diazo Compounds: Approach to Isoquinolinones, *J. Org. Chem.*, 2016, **81**, 2166–2173.
- [9] S. Ning, L. Zhang, J. Ma, L. Chen, G. Zeng, C. Yang, Y. Zhou, X. Guo and X. Deng, Modular and scalable synthesis of nematode pheromone ascarosides: implications in eliciting plant defense response, *Org. Biomol. Chem.*, 2020, **18**, 4956–4961.
- [10] T. Zhou, P.-P. Xie, C.-L. Ji, X. Hong and M. Szostak, Decarbonylative Suzuki–Miyaura Cross-Coupling of Aroyl Chlorides, *Org. Lett.*, 2020, **22**, 6434–6440.
- [11] J. E. Davoren, C.-W. Lee, M. Garnsey, M. A. Brodney, J. Cordes, K. Dlugolenski, J. R.

- Edgerton, A. R. Harris, C. J. Helal, S. Jenkinson, G. W. Kauffman, T. P. Kenakin, J. T. Lazzaro, S. M. Lotarski, Y. Mao, D. M. Nason, C. Northcott, L. Nottebaum, S. V. O'Neil, B. Pettersen, M. Popiolek, V. Reinhart, R. SalomonFerrer, S. J. Steyn, D. Webb, L. Zhang and S. Grimwood, Discovery of the Potent and Selective M1 PAM-Agonist *N*-[(3*R*,4*S*)-3-Hydroxytetrahydro-2*H*-pyran-4-yl]-5-methyl-4-[4-(1,3-thiazol-4-yl)benzyl]pyridine-2-carboxamide (PF-06767832): Evaluation of Efficacy and Cholinergic Side Effects, *J. Med. Chem.*, 2016, **59**, 6313–6328.
- [12] W.-T. Wei, Y.-J. Cheng, Y. Hu, Y.-Y. Chen, X.-J. Zhang, Y. Zou and M. Yan, Concise Synthesis of 4-Arylquinolines *via* Intramolecular Cyclization of Allylamines and Ketones, *Adv. Synth. Catal.*, 2015, **357**, 3474 – 3478.
- [13] B. Ganesan, G. C. Senadi, B.-C. Guo, M.-Y. Huang and W.-Y Lin, A copper(II)-catalyzed annulative formylation of *o*-alkynylanilines with DMF: a single-step strategy for 3-formyl indoles, *RSC Adv.*, 2018, **8**, 40968–40973.
- [14] M. Hu, Y. Gao, W. Wu, J. Li, C. Li, H. Zhang and H. Jiang, Efficient assembly of ynones *via* palladiumcatalyzed sequential carbonylation/alkynylation, *Org. Biomol. Chem.*, 2018, **16**, 7383–7392.
- [15] S. Sharma, J. Park, M. Kim, J. H. Kwak, Y. H. Jung and I. S. Kim, Cu(II)-catalyzed oxidative esterification of 2-carbonyl substituted phenols from the alcohol oxidation level, *Tetrahedron*, 2013, **69**, 9391–9397.
- [16] Y. Yu, L. Ma, J. Xia, L. Xin, L. Zhu and X. Huang, A Modular Approach to Dibenzo-fused  $\epsilon$ -Lactams: Palladium-Catalyzed Bridging-C–H Activation, *Angew. Chem. Int. Ed.*, 2020, **59**, 18261-18266.
- [17] A. Lerchen, S. V. Céspedes and F. Glorius, Cobalt(III)-Catalyzed Redox-Neutral Synthesis of Unprotected Indoles Featuring an N–N Bond Cleavage, *Angew. Chem. Int. Ed.*, 2016, **55**, 3208–3211.
- [18] R. K. Maurya, O. P. S. Patel, D. Anand and P. P. Yadav, Substrate selective synthesis of indole, tetrahydroquinoline and quinoline derivatives *via* intramolecular addition of hydrazones and imines, *Org. Chem. Front.*, 2018, **5**, 1170–1175.
- [19] S. Minakata, Y. Kasano, H. Ota, Y. Oderaotoshi and M. Komatsu, 1,6-Stannatropic Strategy: Effective Generation and Cyclization of 1,5-Dipoles from *o*-Stannylmethylated

- Thioanilides or Phenyl Isothiocyanates, *Org. Lett.*, 2006, **8**, 3693–3695.
- [20] H. Yan, H. Wang, X. Li, X. Xin, C. Wang and B. Wan, Rhodium-Catalyzed C–H Annulation of Nitrones with Alkynes: A Regiospecific Route to Unsymmetrical 2,3-Diaryl-Substituted Indoles, *Angew. Chem. Int. Ed.*, 2015, **54**, 10613–10617.
- [21] G. A. Kraus and H. Guo, A Flexible Synthesis of 2,3-Disubstituted Indoles from Aminobenzyl Phosphonium Salts. A Direct Synthesis of Rutaecarpine, *J. Org. Chem.*, 2009, **74**, 5337–5341.
- [22] J. Chen, Z. Chen, H. Zhao, T. Zhang, W. Wang, Y. Zou, X. Zhang and M. Yan, Intramolecular addition of diarylmethanols to imines promoted by KO<sup>t</sup>-Bu/DMF: a new synthetic approach to indole derivatives, *Org. Biomol. Chem.*, 2016, **14**, 4071–4076.
- [23] J. Li, Y. An, J. Li, S. Yang, W. Wu and H. Jiang, Palladium-catalyzed C–S bond activation and functionalization of 3-sulfonylindoles and related electron-rich heteroarenes, *Org. Chem. Front.*, 2017, **4**, 1590–1594.
- [24] D. Zhao, Z. Shi and F. Glorius, Indole Synthesis by Rhodium(III)-Catalyzed Hydrazine-Directed C–H Activation: Redox-Neutral and Traceless by N–N Bond Cleavage, *Angew. Chem. Int. Ed.*, 2013, **52**, 12426–12429.
- [25] H. Wang, M. Moselage, M. J. González and L. Ackermann, Selective Synthesis of Indoles by Cobalt(III)-Catalyzed C–H/N–O Functionalization with Nitrones, *ACS Catal.*, 2016, **6**, 2705–2709.
- [26] H. Lee and C. S. Yi, Catalytic Synthesis of Substituted Indoles and Quinolines from the Dehydrative C–H Coupling of Arylamines with 1,2- and 1,3-Diols, *Organometallics*, 2016, **35**, 1973–1977.
- [27] Y. Shang, K. Jonnada, S. L. Yedage, H. Tu, X. Zhang, X. Lou, S. Huang and W. Su, Rhodium(iii)-catalyzed indole synthesis at room temperature using the transient oxidizing directing group strategy, *Chem. Commun.*, 2019, **55**, 9547–9550.
- [28] Y. Liang and N. Jiao, Cationic Cobalt(III) Catalyzed Indole Synthesis: The Regioselective Intermolecular Cyclization of N-Nitrosoanilines and Alkynes, *Angew. Chem. Int. Ed.*, 2016, **55**, 4035–4039.
- [29] W. Zeng, W.-Q. Wu, H.-F. Jiang, L.-B. Huang, Y.-D. Sun, Z.-W. Chen and X.-W. Li, Facile synthesis of benzofurans via copper-catalyzed aerobic oxidative cyclization of phenols and

- alkynes, *Chem. Commun.*, 2013, **49**, 6611–6613.
- [30] M. Nakamura, L. Ilies, S. Otsubo and E. Nakamura, 2,3-Disubstituted Benzofuran and Indole by Copper-Mediated C–C Bond Extension Reaction of 3-Zincobenzoheterole, *Org. Lett.*, 2006, **8**, 2803–2805.
- [31] S. Baruah, P. P. Kaishap and S. Gogoi, Ru(II)-Catalyzed C–H activation and annulation of salicylaldehydes with monosubstituted and disubstituted alkynes, *Chem. Commun.*, 2016, **52**, 13004–13007.
- [32] M. Begala, P. Caboni, M. J. Matos and G. L. Delogu, Unexpected one-step synthesis of 3-benzoyl-2-phenylbenzofurans under Wittig conditions, *Tetrahedron Lett.*, 2018, **59**, 1711–1714.
- [33] B. Alcaide, P. Almendros, E. Busto, F. Herrera, C. Lazaro-Milla and A. Luna, Photopromoted Entry to Benzothiophenes, Benzoselenophenes, 3H-Indoles, Isocoumarins, Benzosultams, and (Thio)flavones by Gold-Catalyzed Arylative Heterocyclization of Alkynes, *Adv. Synth. Catal.*, 2017, **359**, 2640–2652.
- [34] X. Ma, Q. Xu, H. Li, C. Su, L. Yu, X. Zhang, H. Cao and L.-B. Han, Alcohol-based Michaelis–Arbuzov reaction: an efficient and environmentally-benign method for C–P(O) bond formation, *Green Chem.*, 2018, **20**, 3408–3413.
- [35] V. V. Grushin, Synthesis of Hemilabile Phosphine–Phosphine Oxide Ligands via the Highly Selective Pd-Catalyzed Mono-oxidation of Bidentate Phosphines: Scope, Limitations, and Mechanism, *Organometallics*, 2001, **20**, 3950–3961.
- [36] H. Zeng and C.-J. Li, A Complete Switch of the Directional Selectivity in the Annulation of 2-Hydroxybenzaldehydes with Alkynes, *Angew. Chem. Int. Ed.*, 2014, **53**, 13862–13965.
- [37] J., Liu, X., Zhang, L. Shi, M. Liu, Y. Yue, F. Li and K. Zhuo, Base-promoted synthesis of coumarins from salicylaldehydes and aryl-substituted 1,1-dibromo-1-alkenes under transition-metal-free conditions, *Chem. Commun.*, 2014, **50**, 9887–9890.
- [38] A. Banerjee, S. K. Santra, N. Khatun, W. Ali and B. K. Patel, Oxidant controlled regioselective mono- and di-functionalization reactions of coumarins, *Chem. Commun.*, 2015, **51**, 15422–15425.

- [39] Y. Jiang, W. Chen and W. Lu, Synthesis of 3-arylcoumarins through *N*-heterocyclic carbene catalyzed condensation and annulation of 2-chloro-2-arylacetaldehydes with salicylaldehydes, *Tetrahedron Lett.*, 2013, **69**, 3669-3676.
- [40] M. Čakurda, P. Koiš, G. Addová, M. Lácová and A. Boháč, 2H-Pyrano[3,2-*c*]quinolin-2-ones: their convenient synthesis and selected reactions, *Chem. Pap.*, 2018, **72**, 683-690.
- [41] L. Plazzi, A. Cavalli, F. Belluti, A. Bisi, S. Gobbi, S. Rizzo, M. Bartolini, V. Andrisano, M. Recanatini and A. Rampa, Extensive SAR and Computational Studies of 3-{4-[(Benzylmethylamino)methyl]phenyl}-6,7-dimethoxy-2H-2-chromenone (AP2238) Derivatives, *J. Med. Chem.*, 2007, **50**, 4250–4254.
- [42] P. Zhou, W.-T. Yang, A. U. Rahman, G. Li and B. Jiang, Rh(III)-Catalyzed [3 + 3] Annulation Reaction of Cyclopropanones and Sulfoxonium Ylides toward Trisubstituted 2-Pyrones, *J. Org. Chem.*, 2020, **85**, 360–366.

## VI. Copies of NMR spectra.

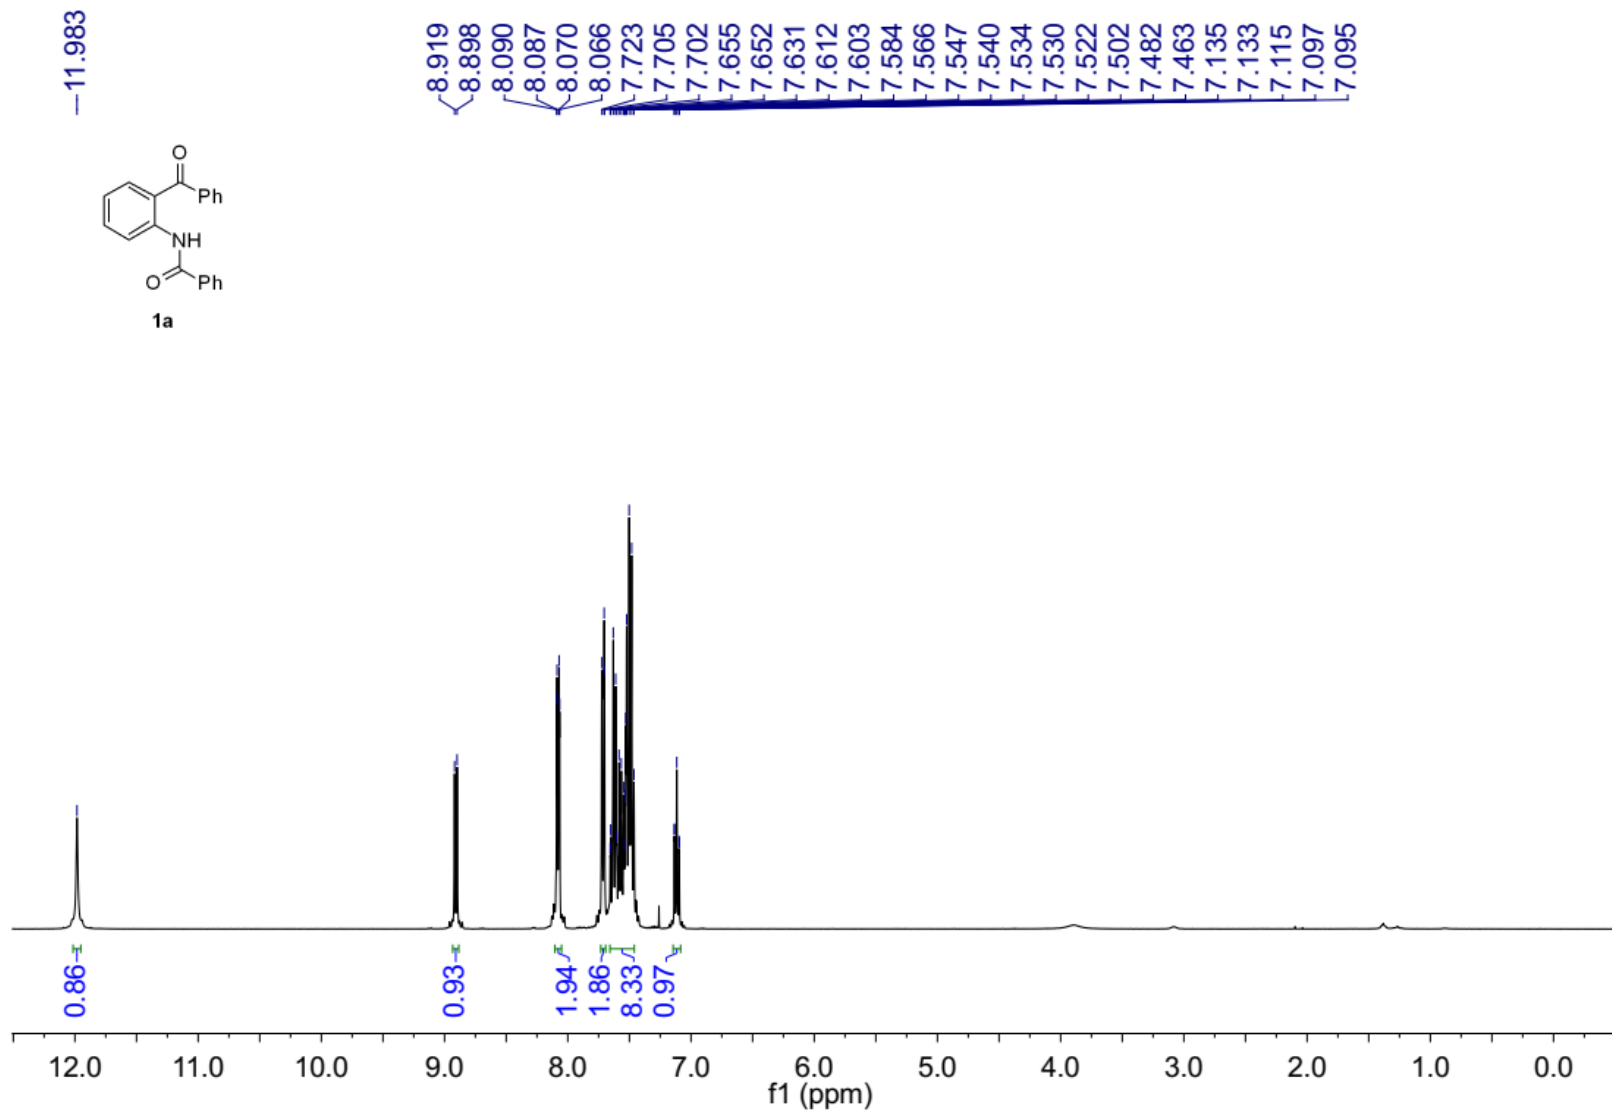



—200.194

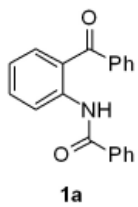

—165.723

141.017  
138.650  
134.535  
134.448  
133.941  
132.307  
131.937  
129.700  
128.711  
128.220  
127.300  
122.986  
122.065  
121.309

77.318  
77.000  
76.682

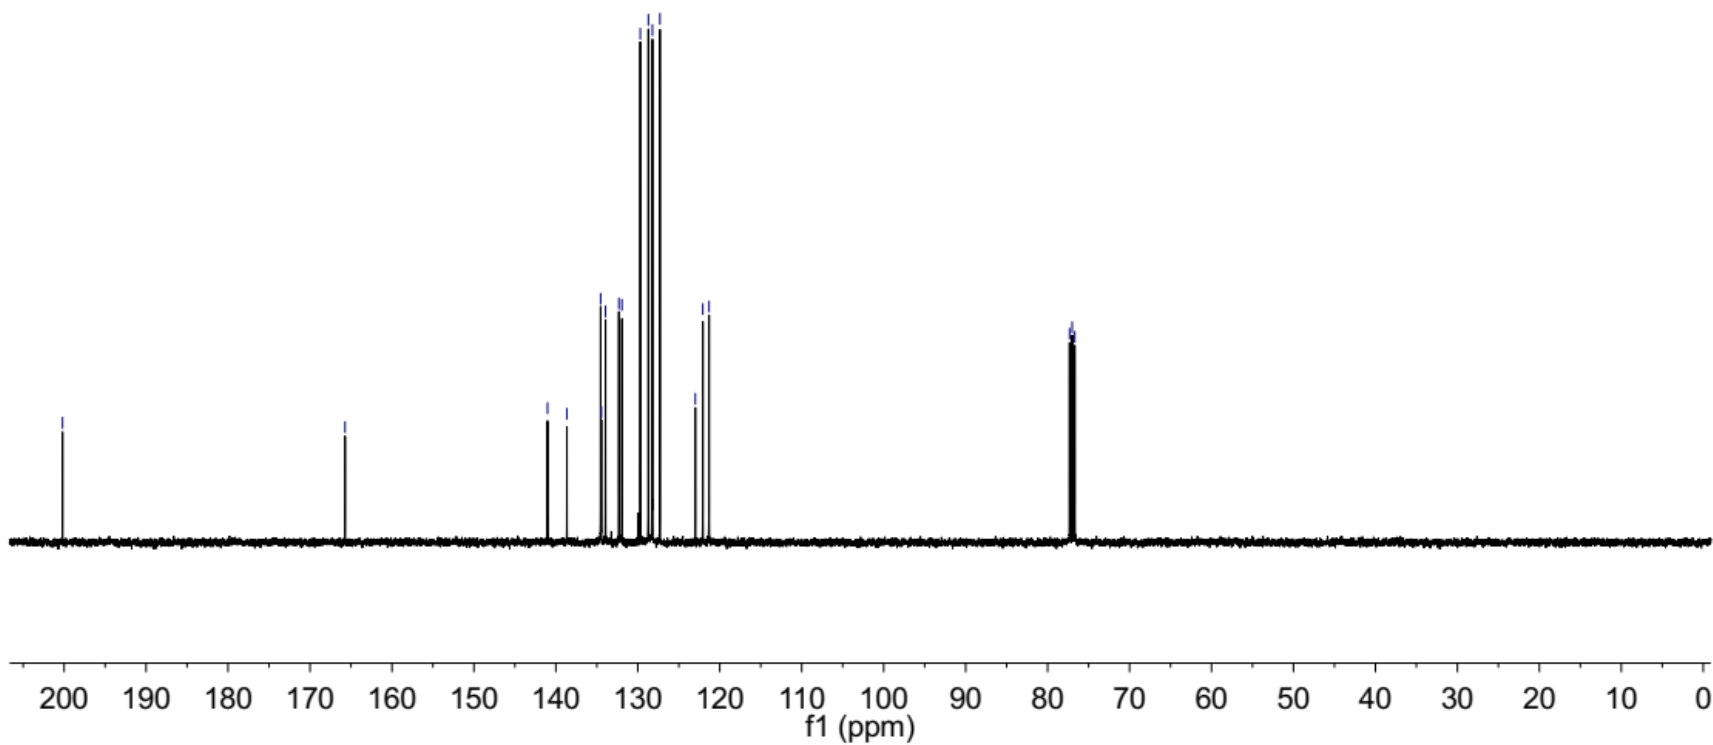

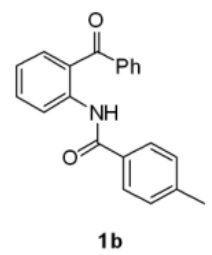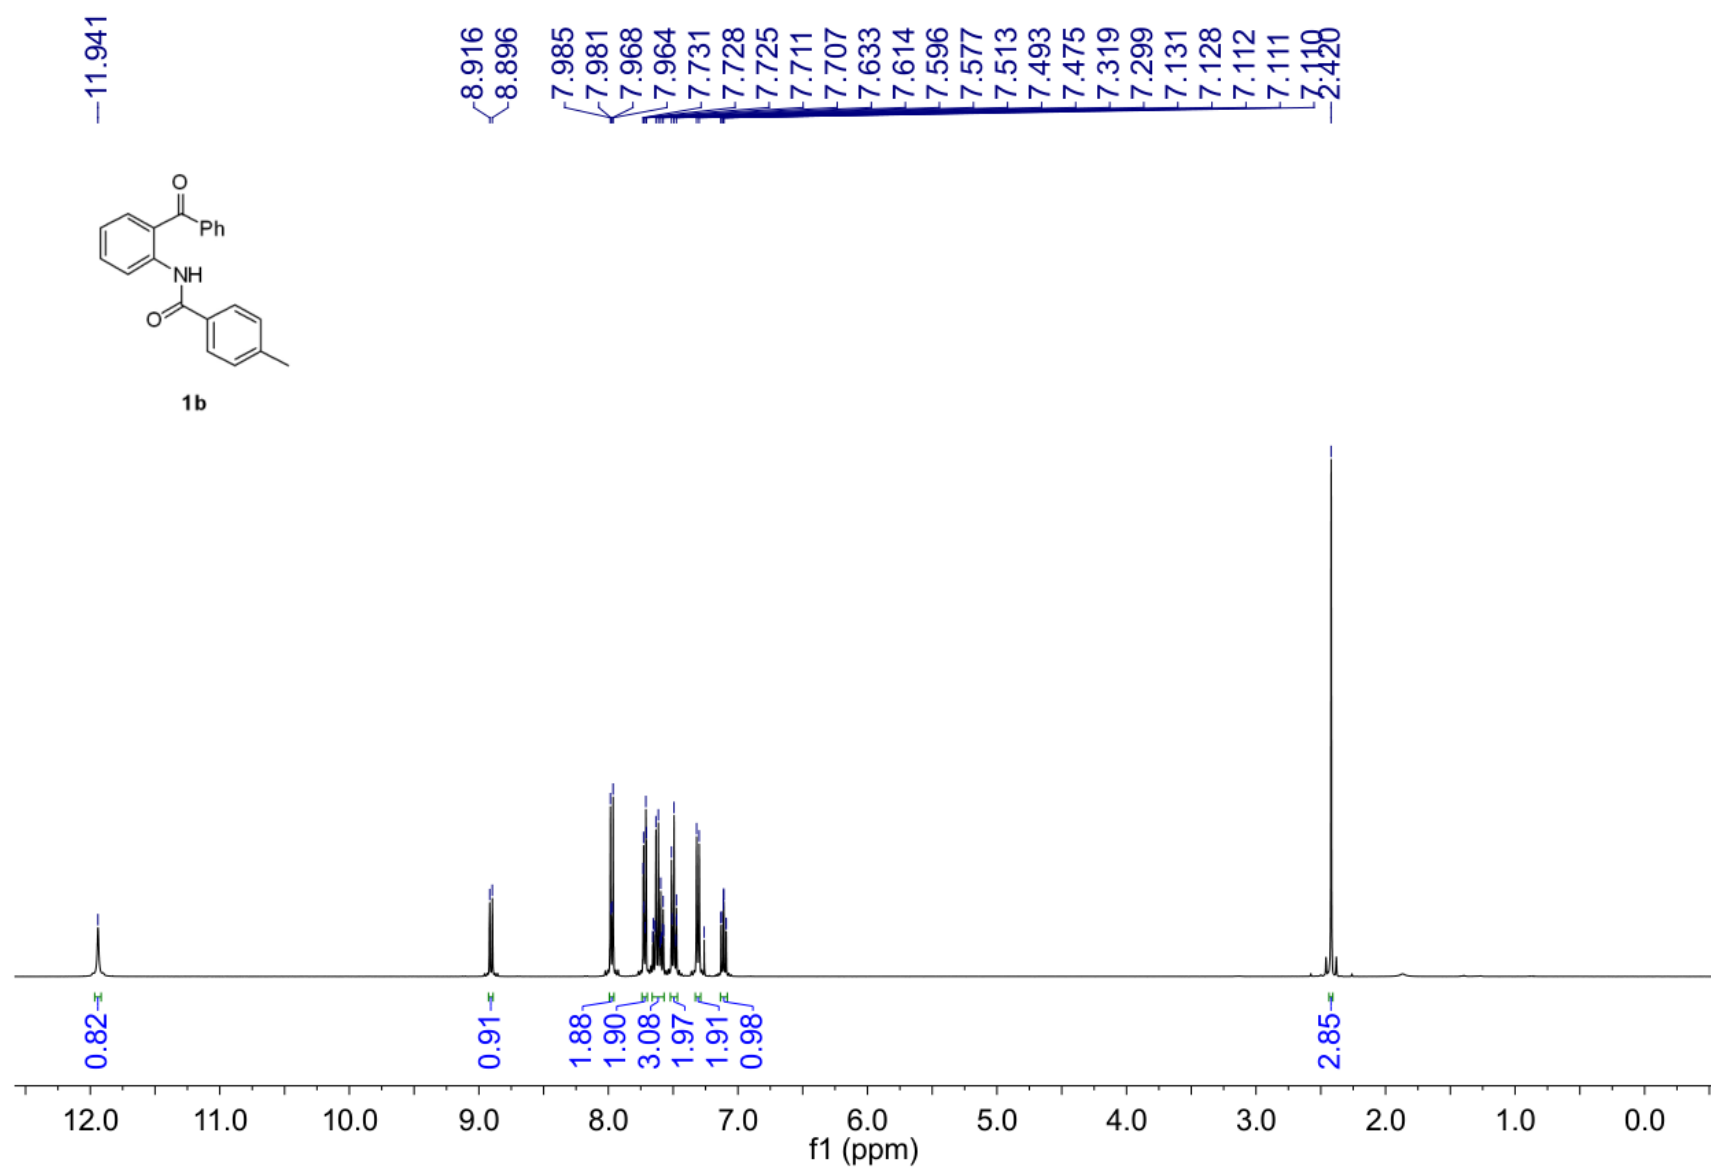

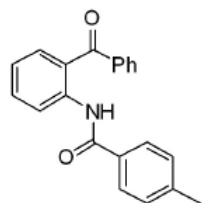

**1b**

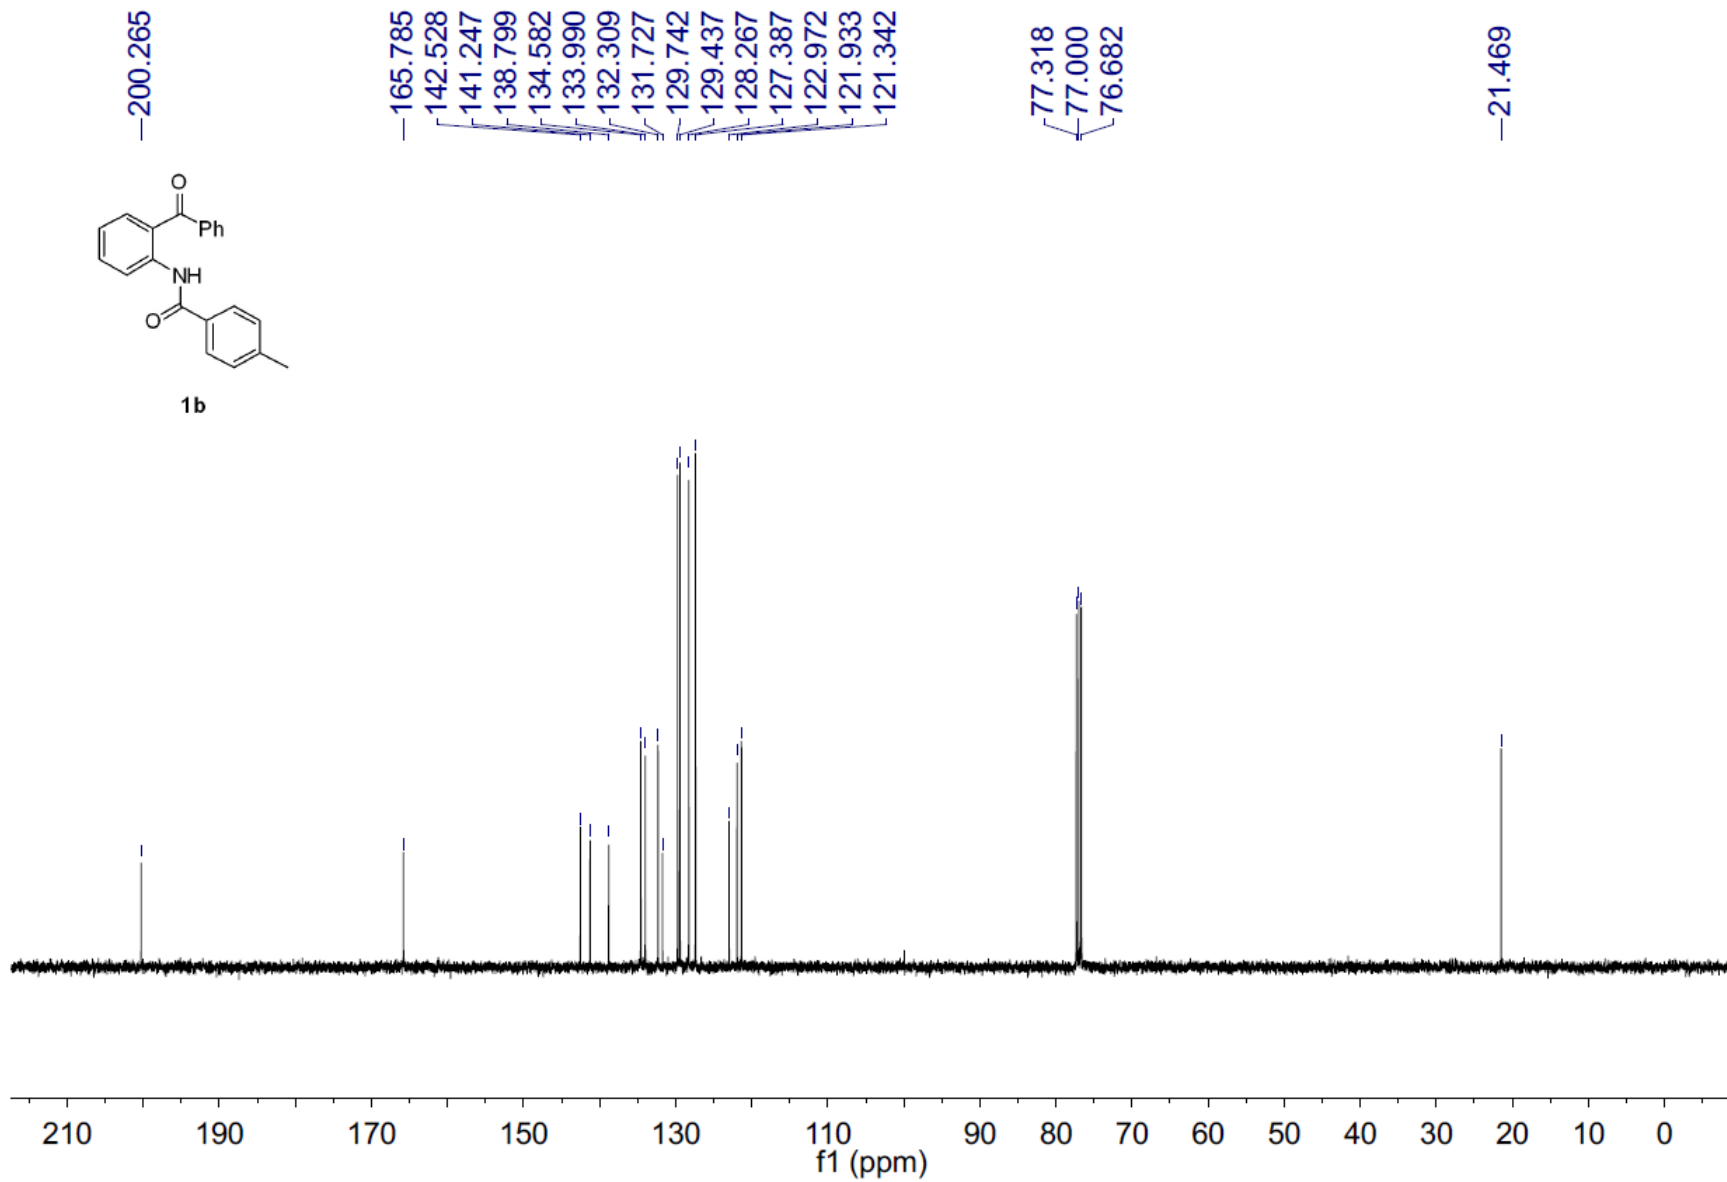

11.922

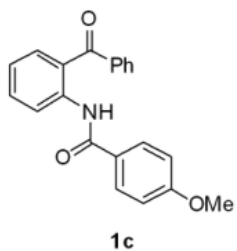

8.898  
8.878  
8.047  
8.026  
7.710  
7.691  
7.628  
7.608  
7.589  
7.572  
7.554  
7.490  
7.471  
7.452  
7.098  
7.079  
7.061  
6.992  
6.970  
3.835

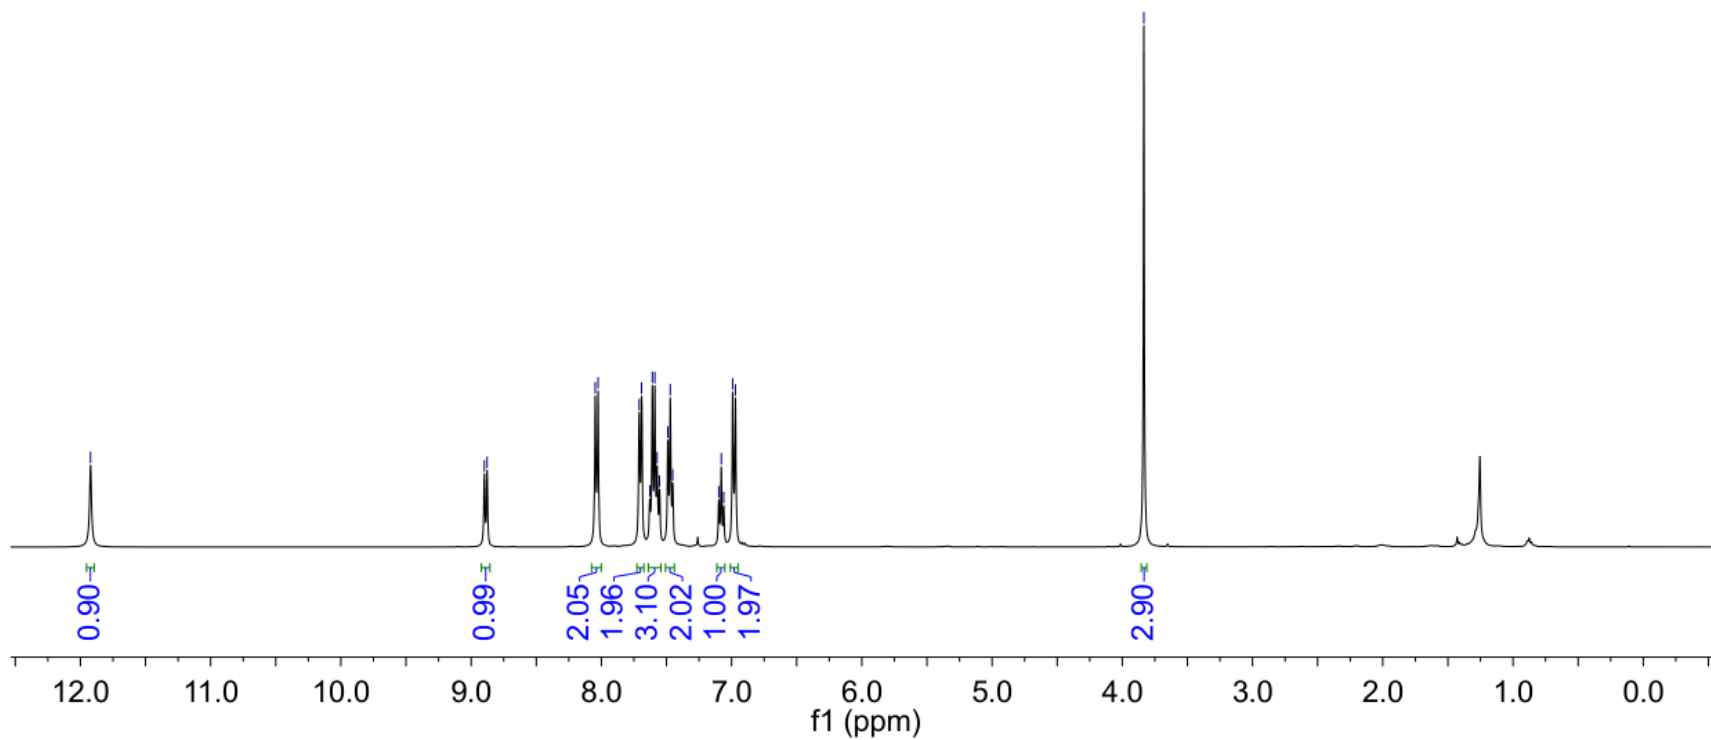

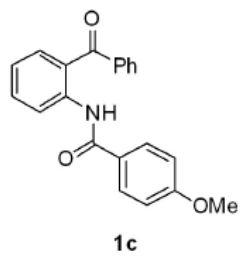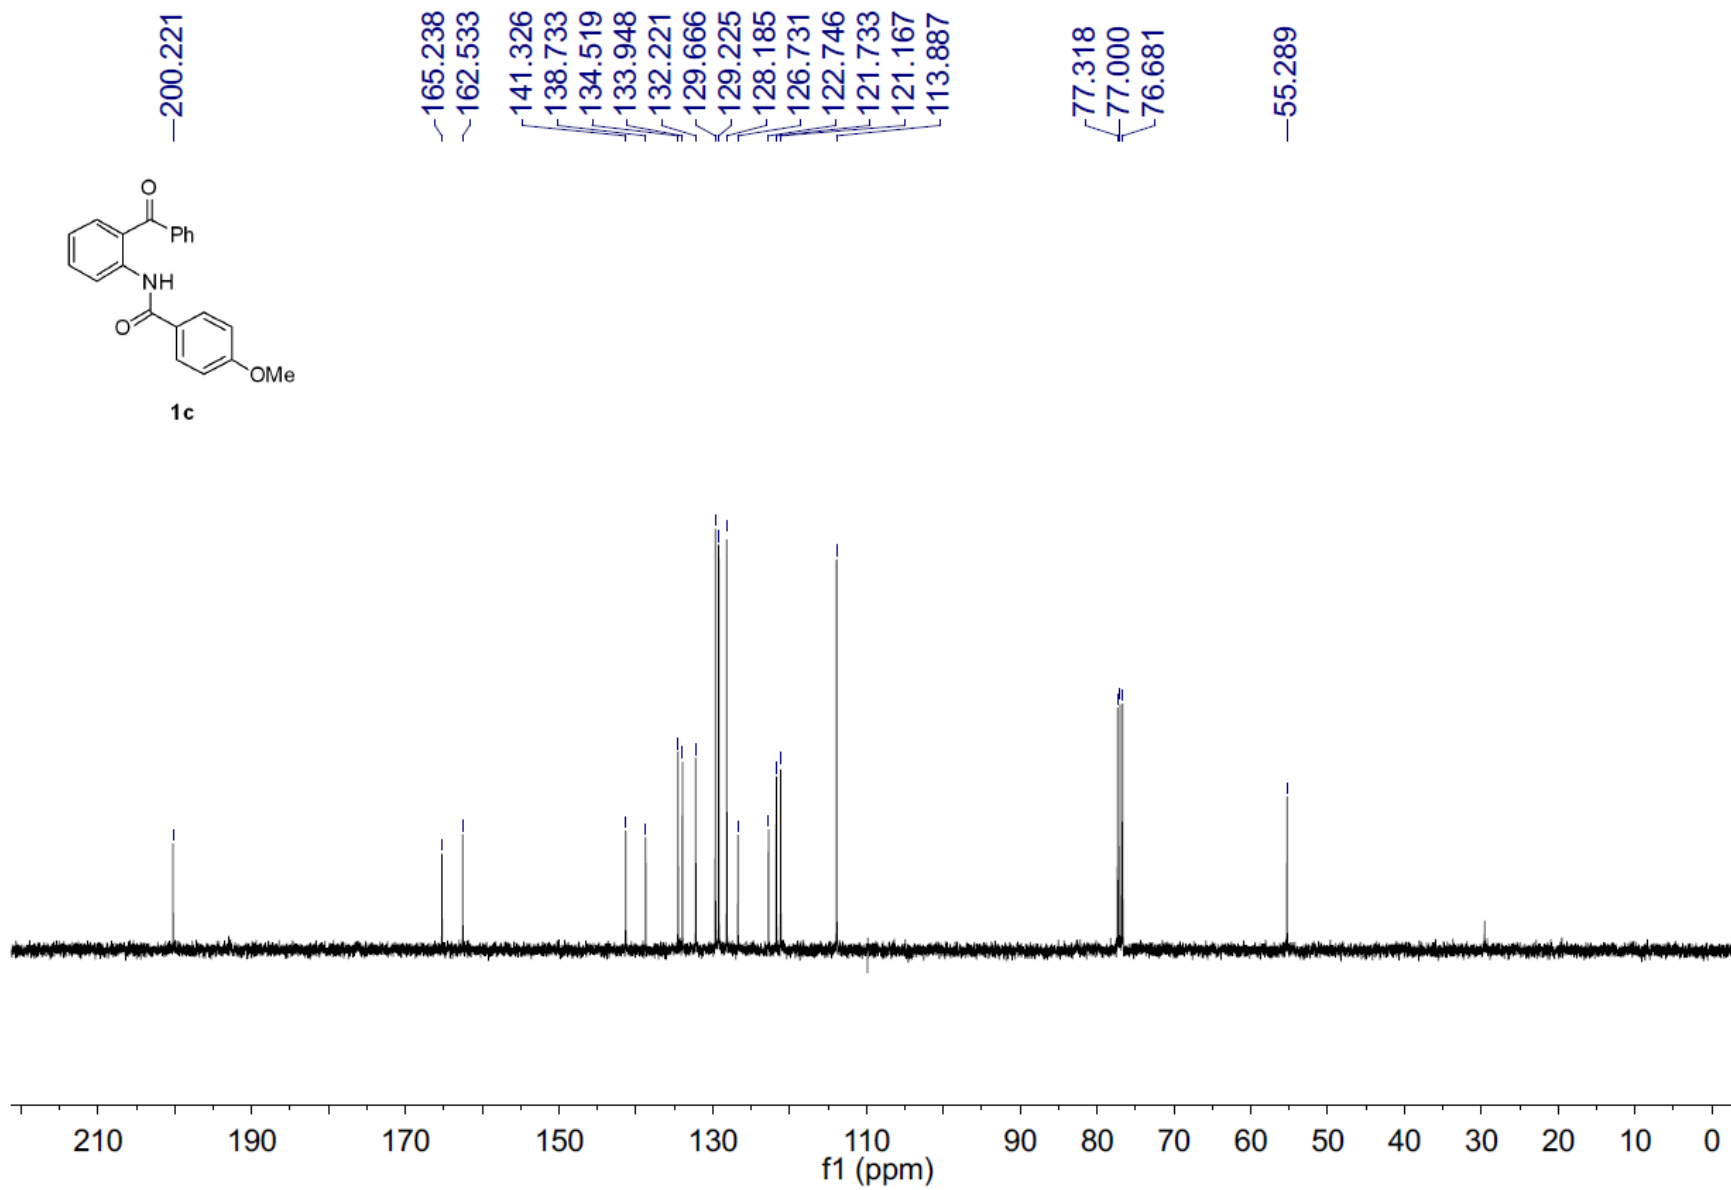

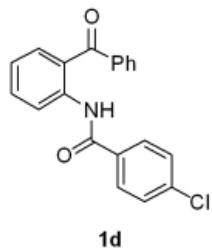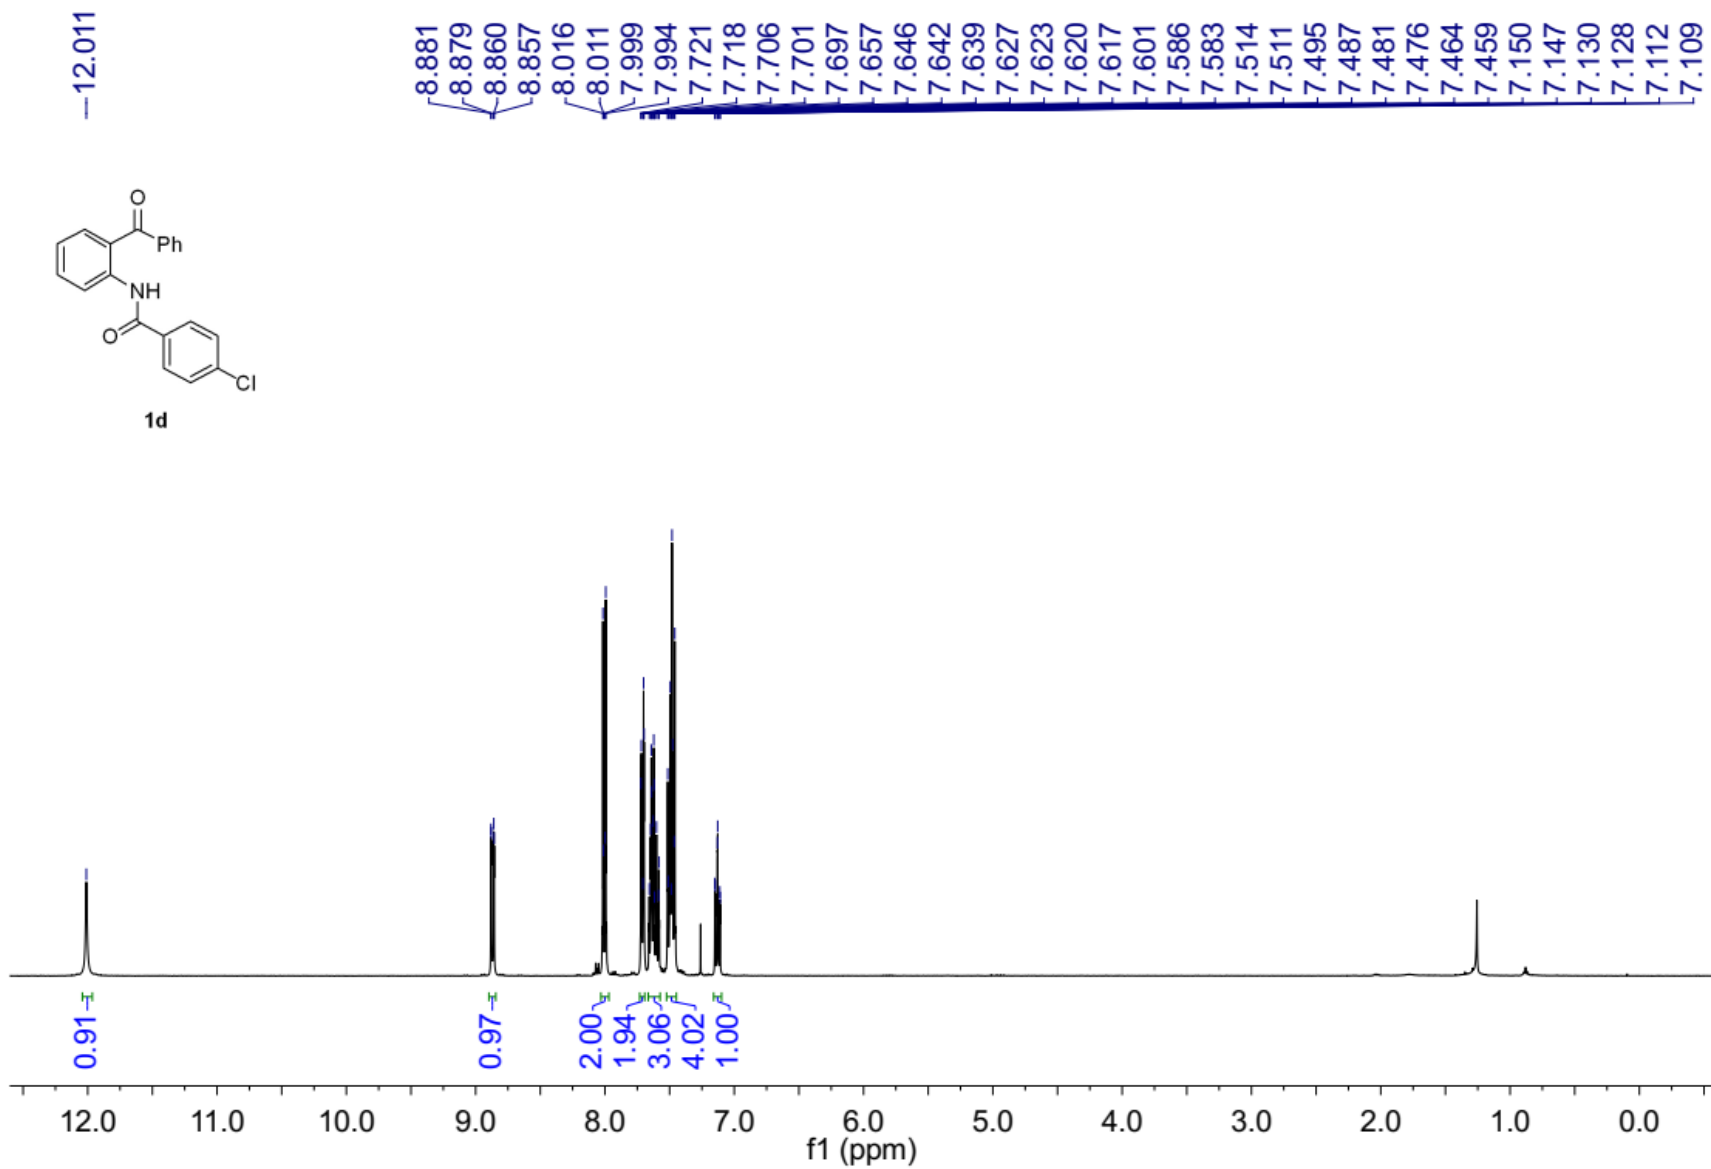

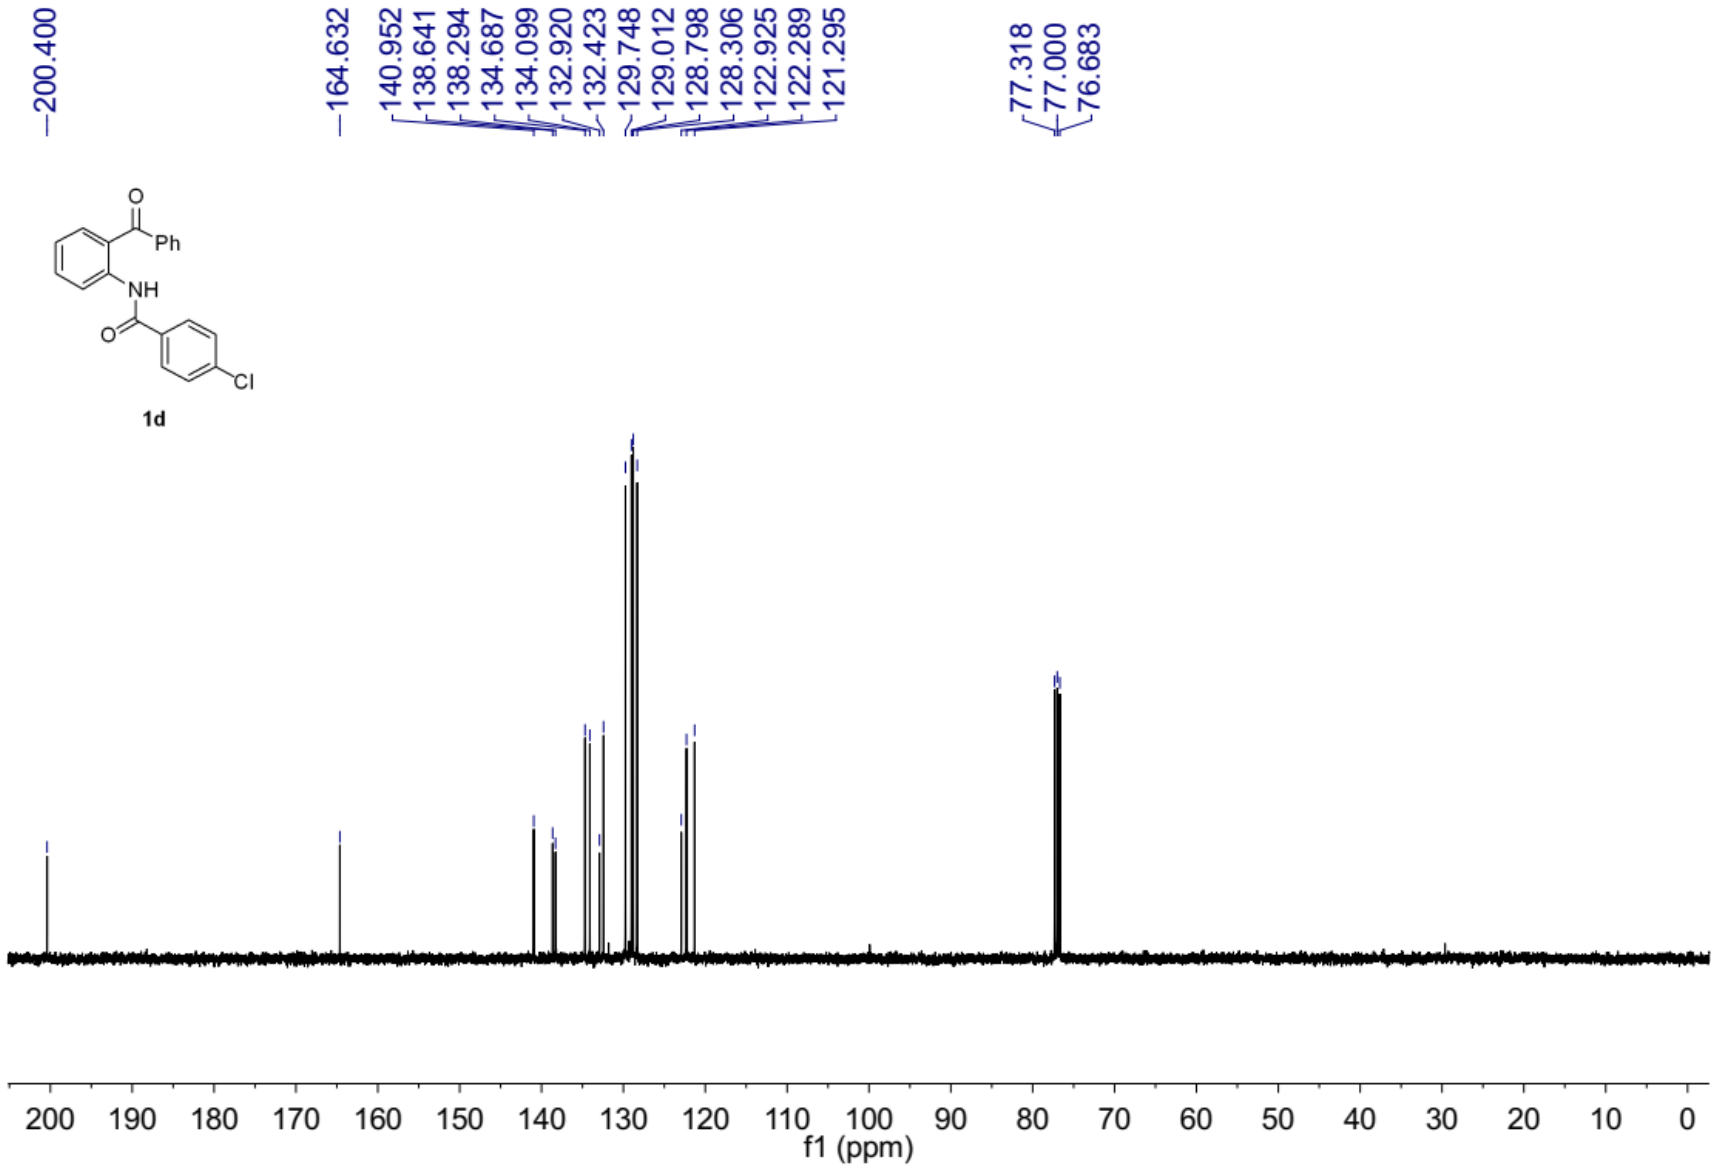

12.109

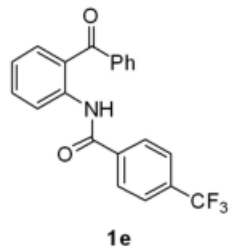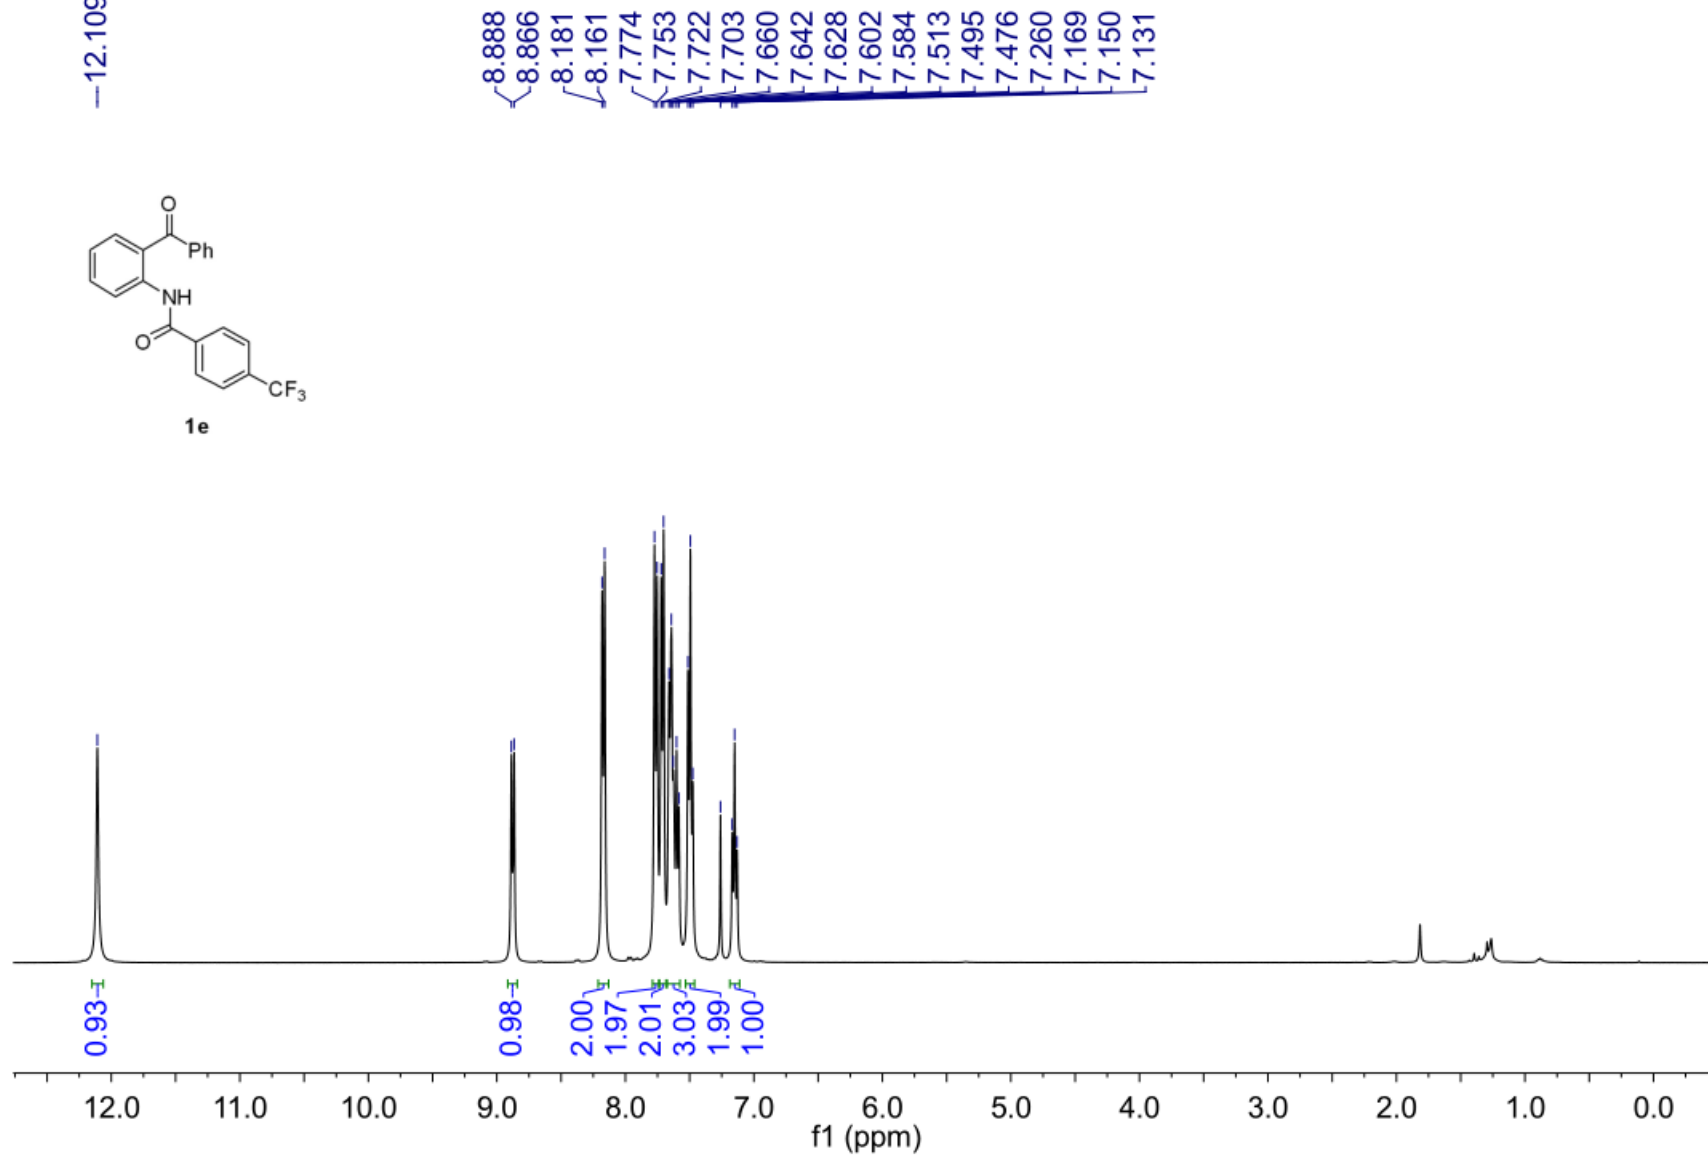



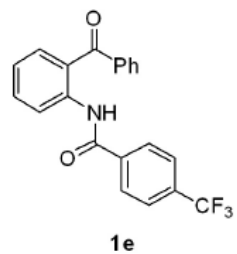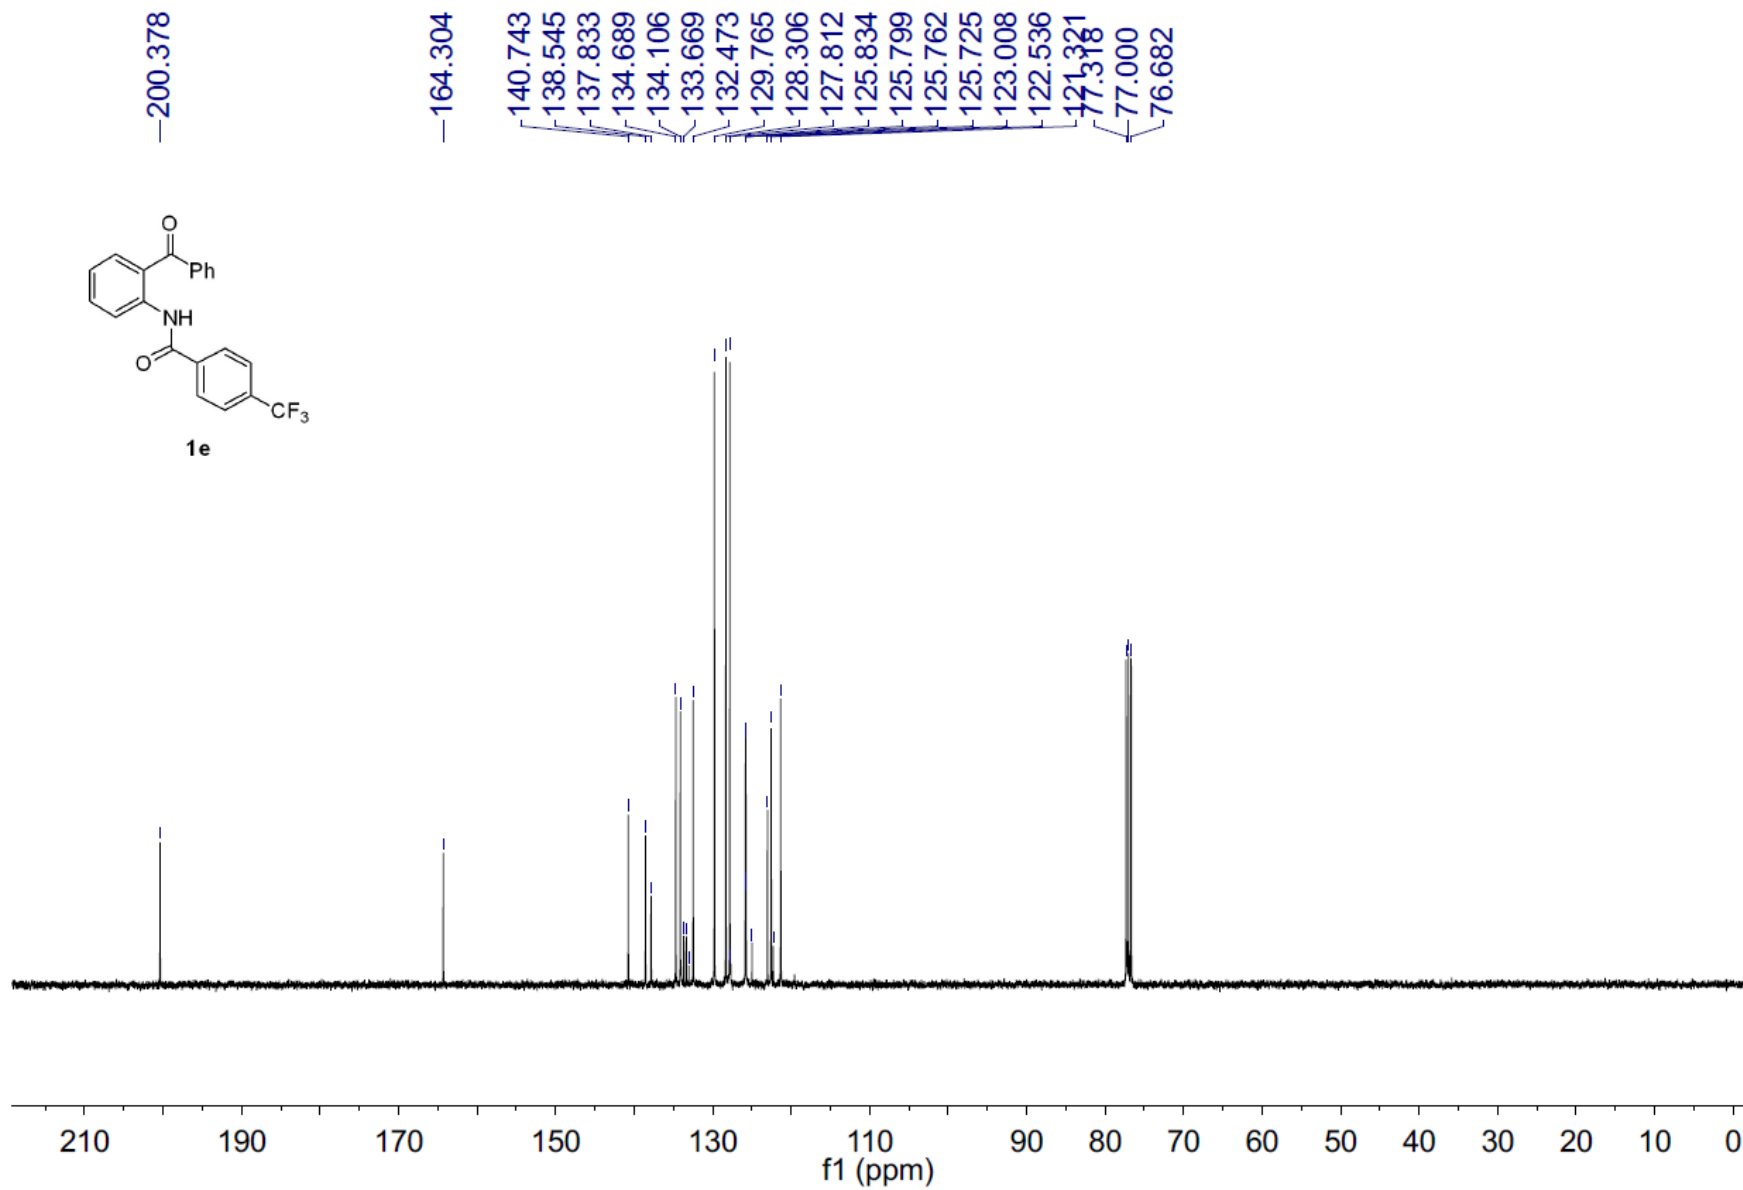

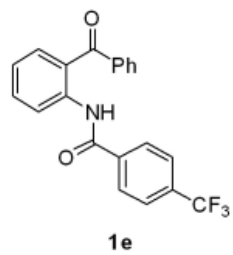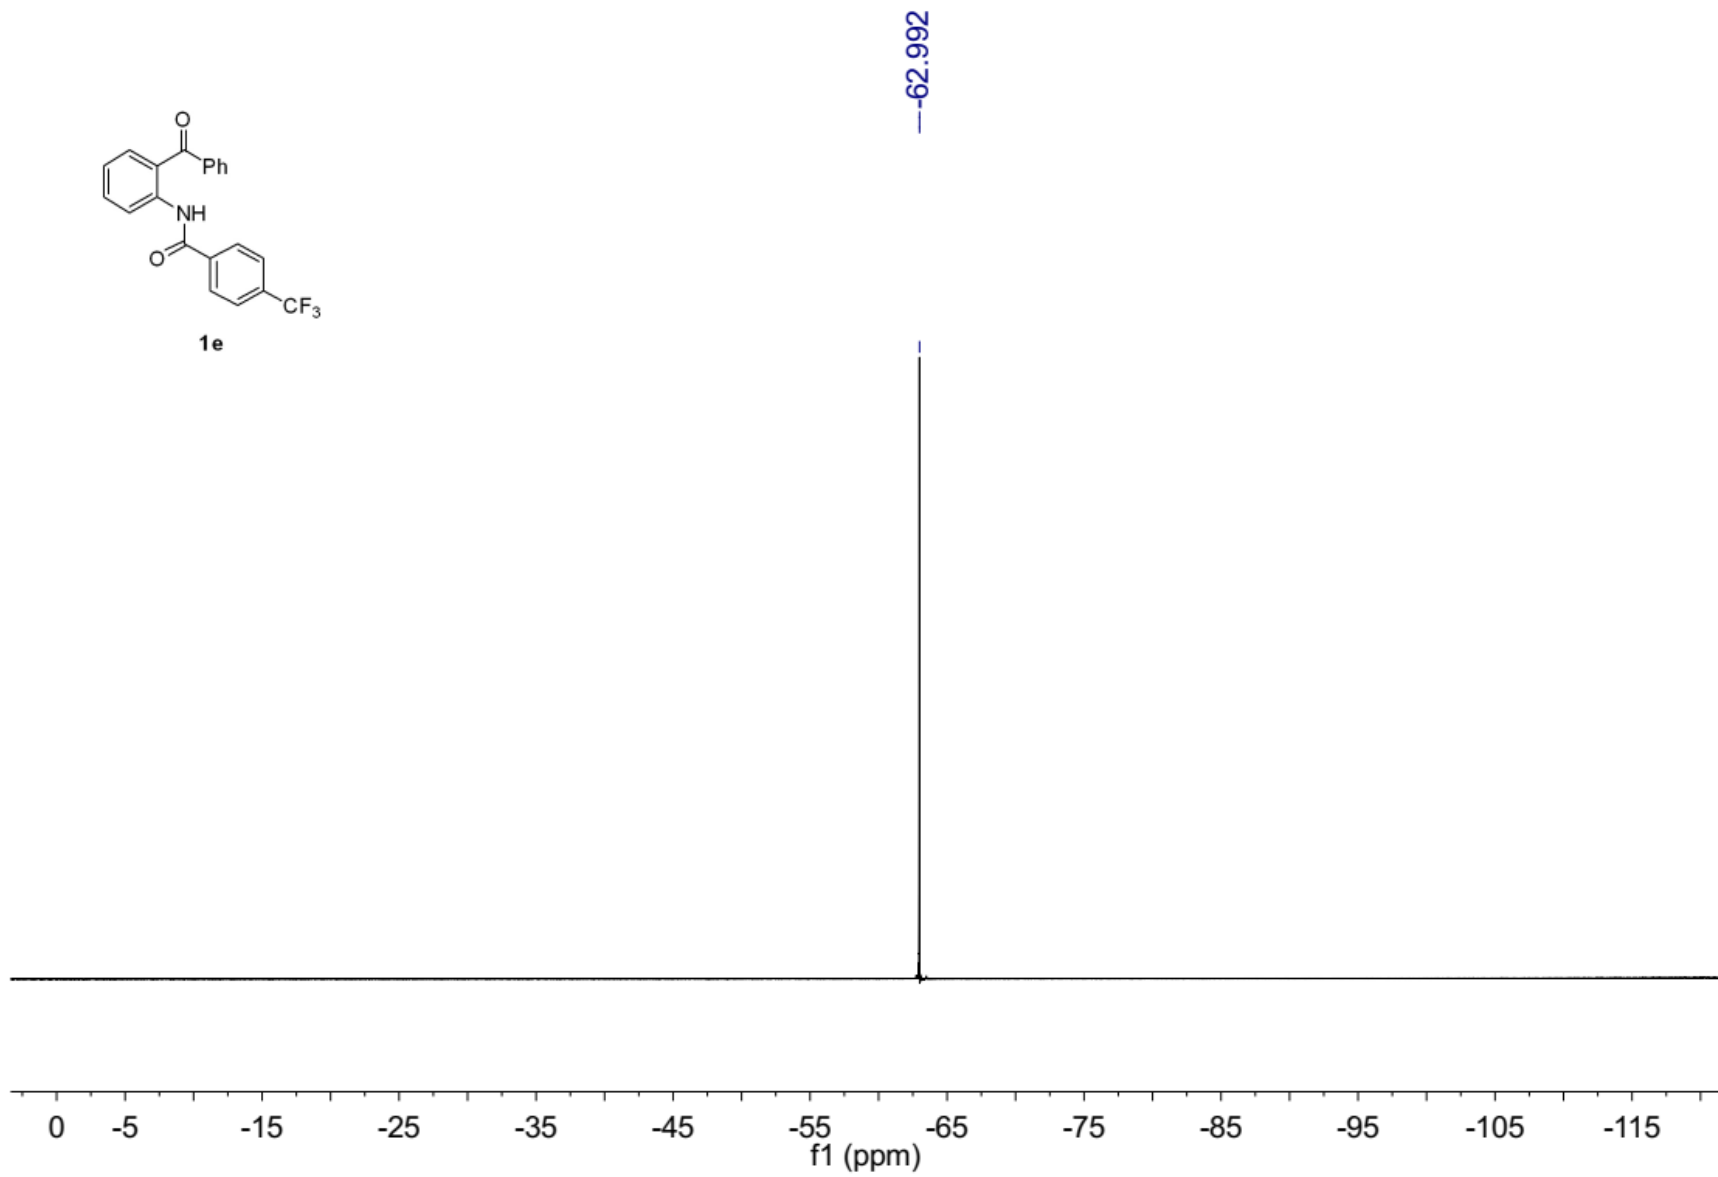

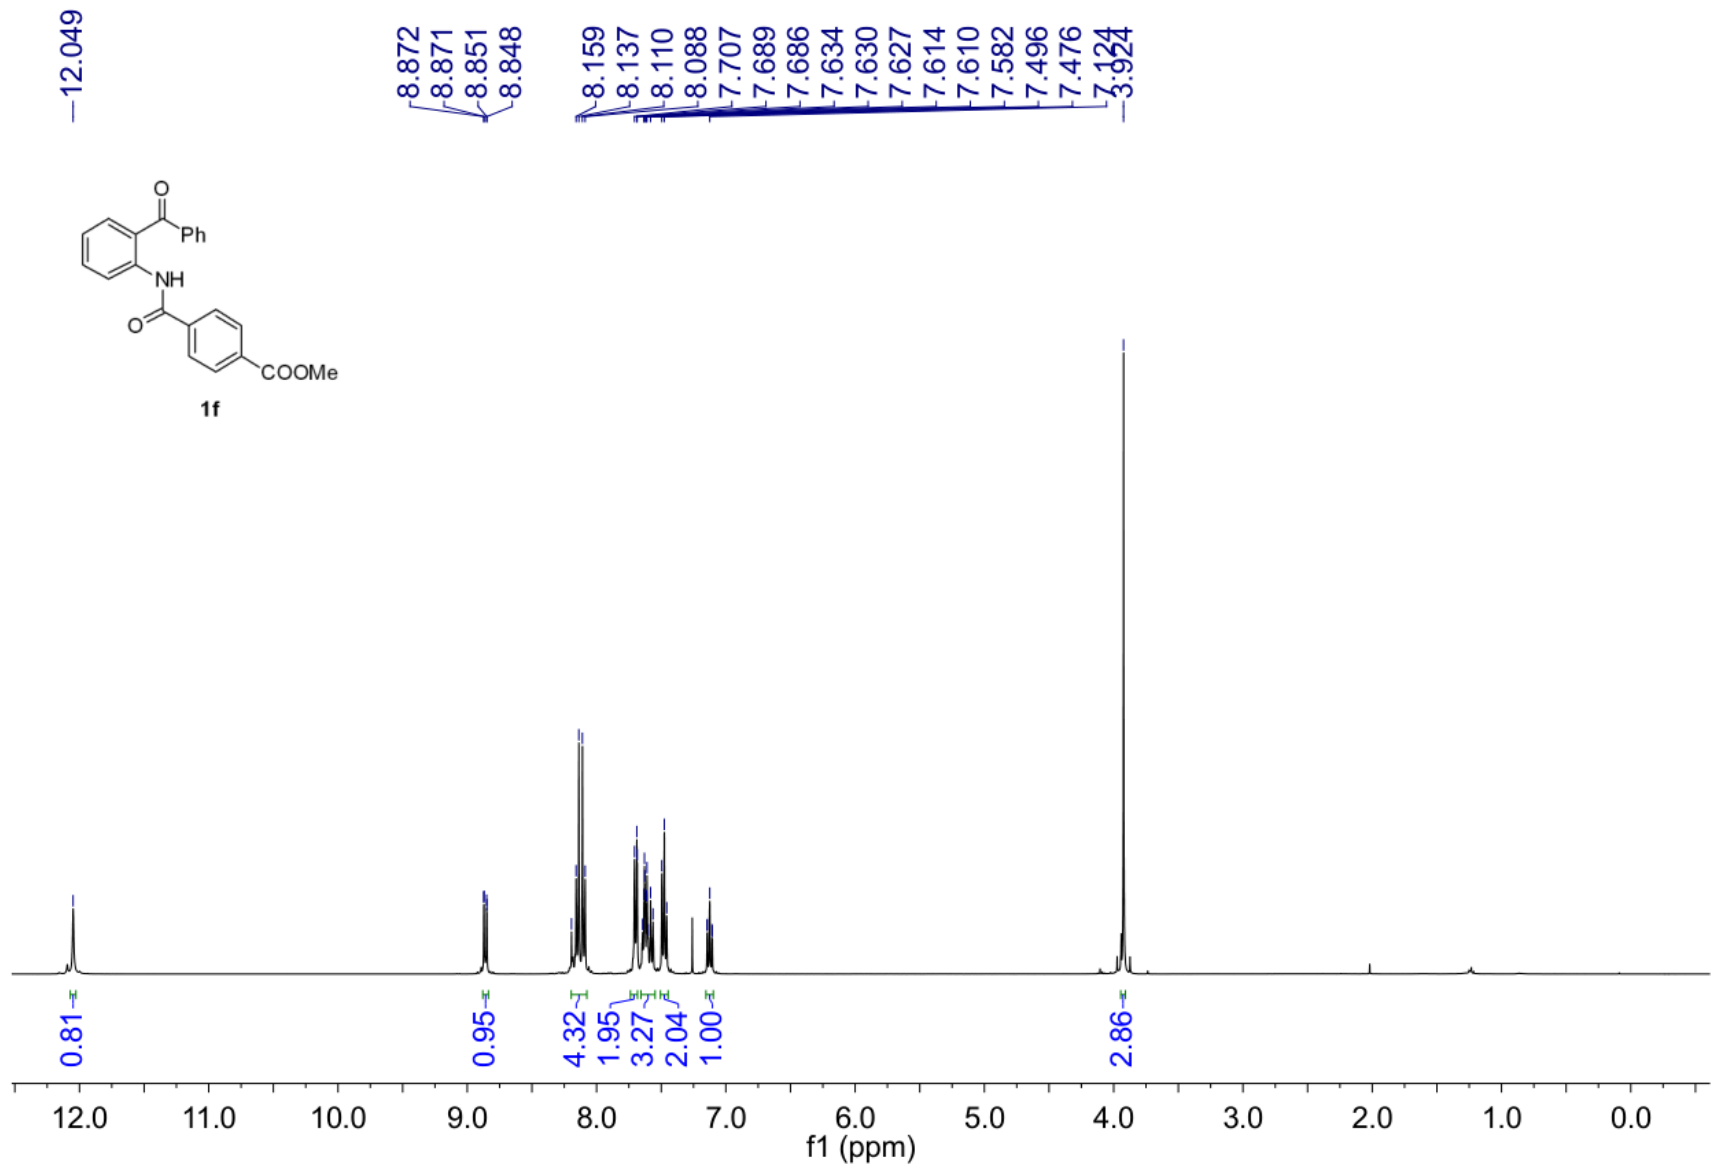

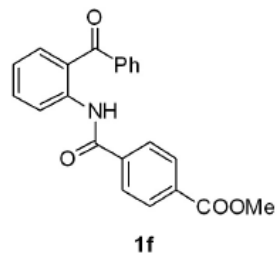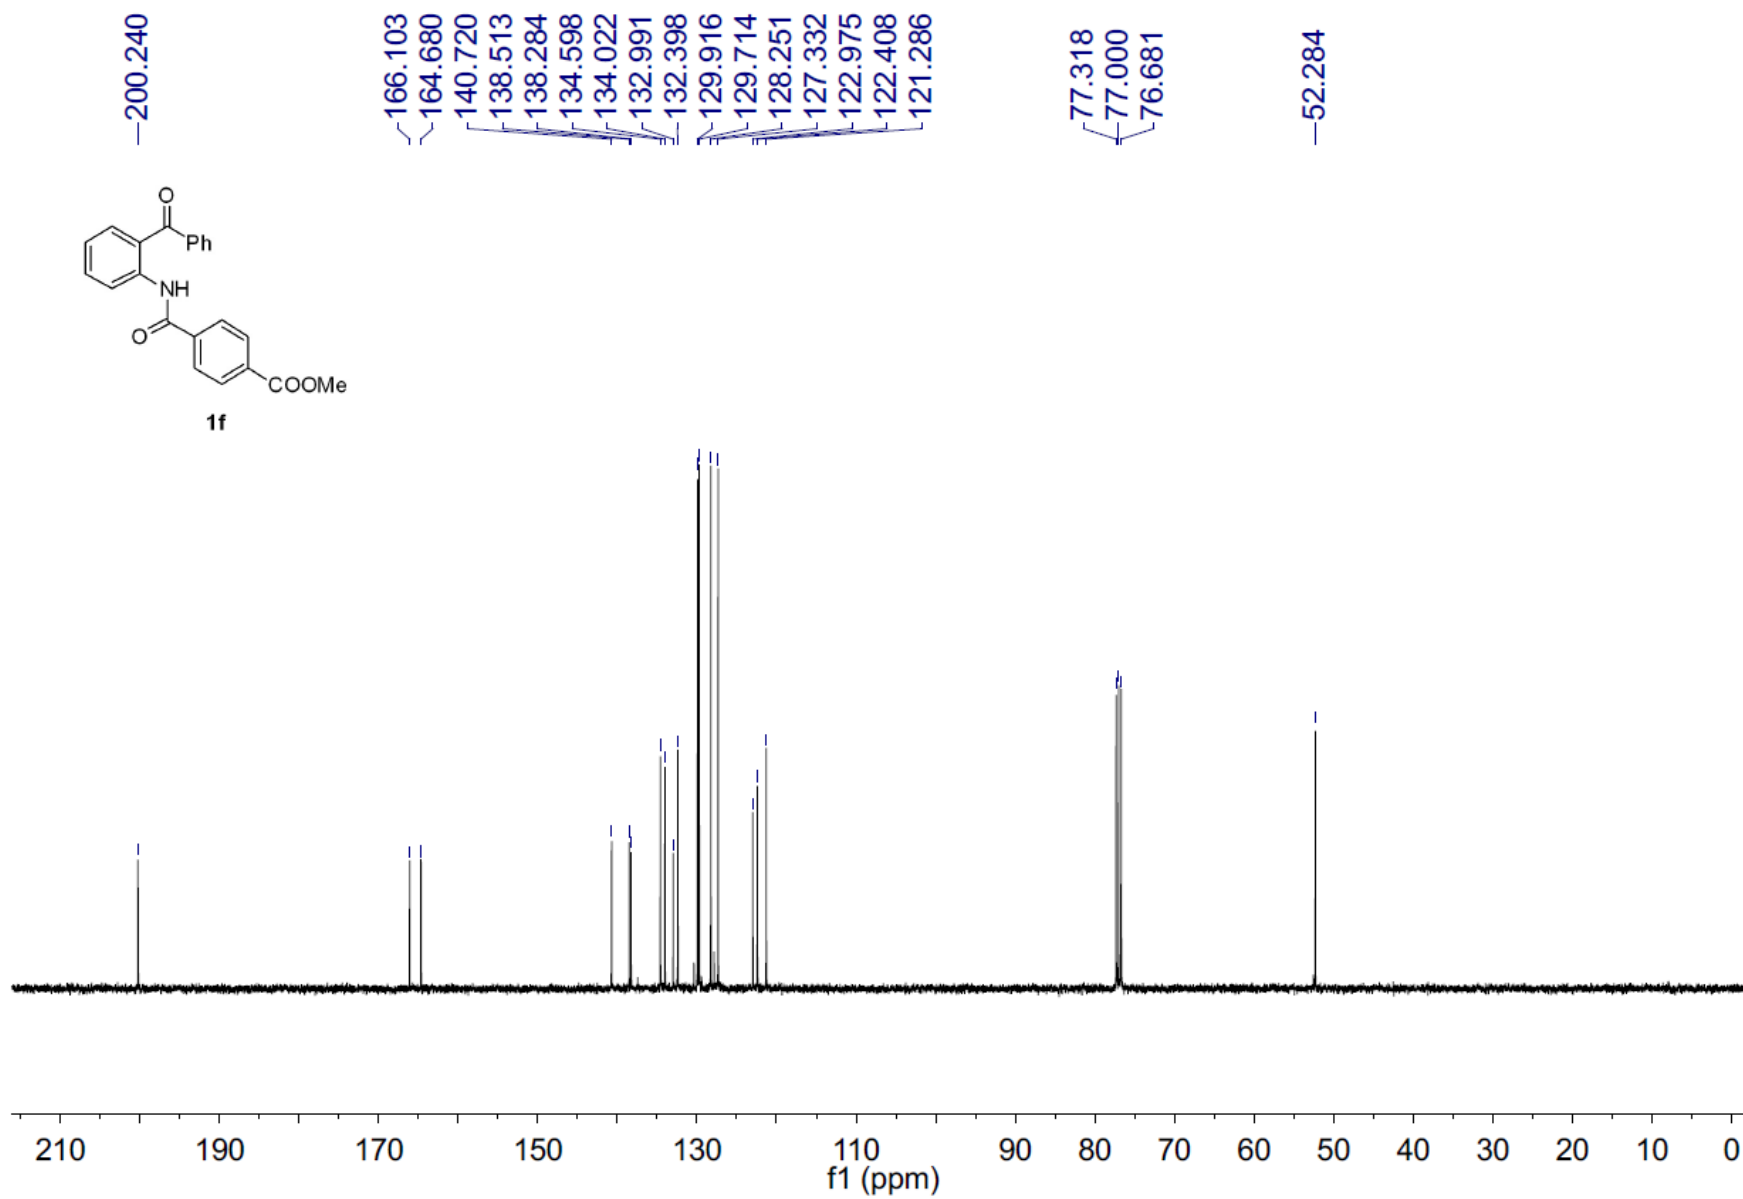

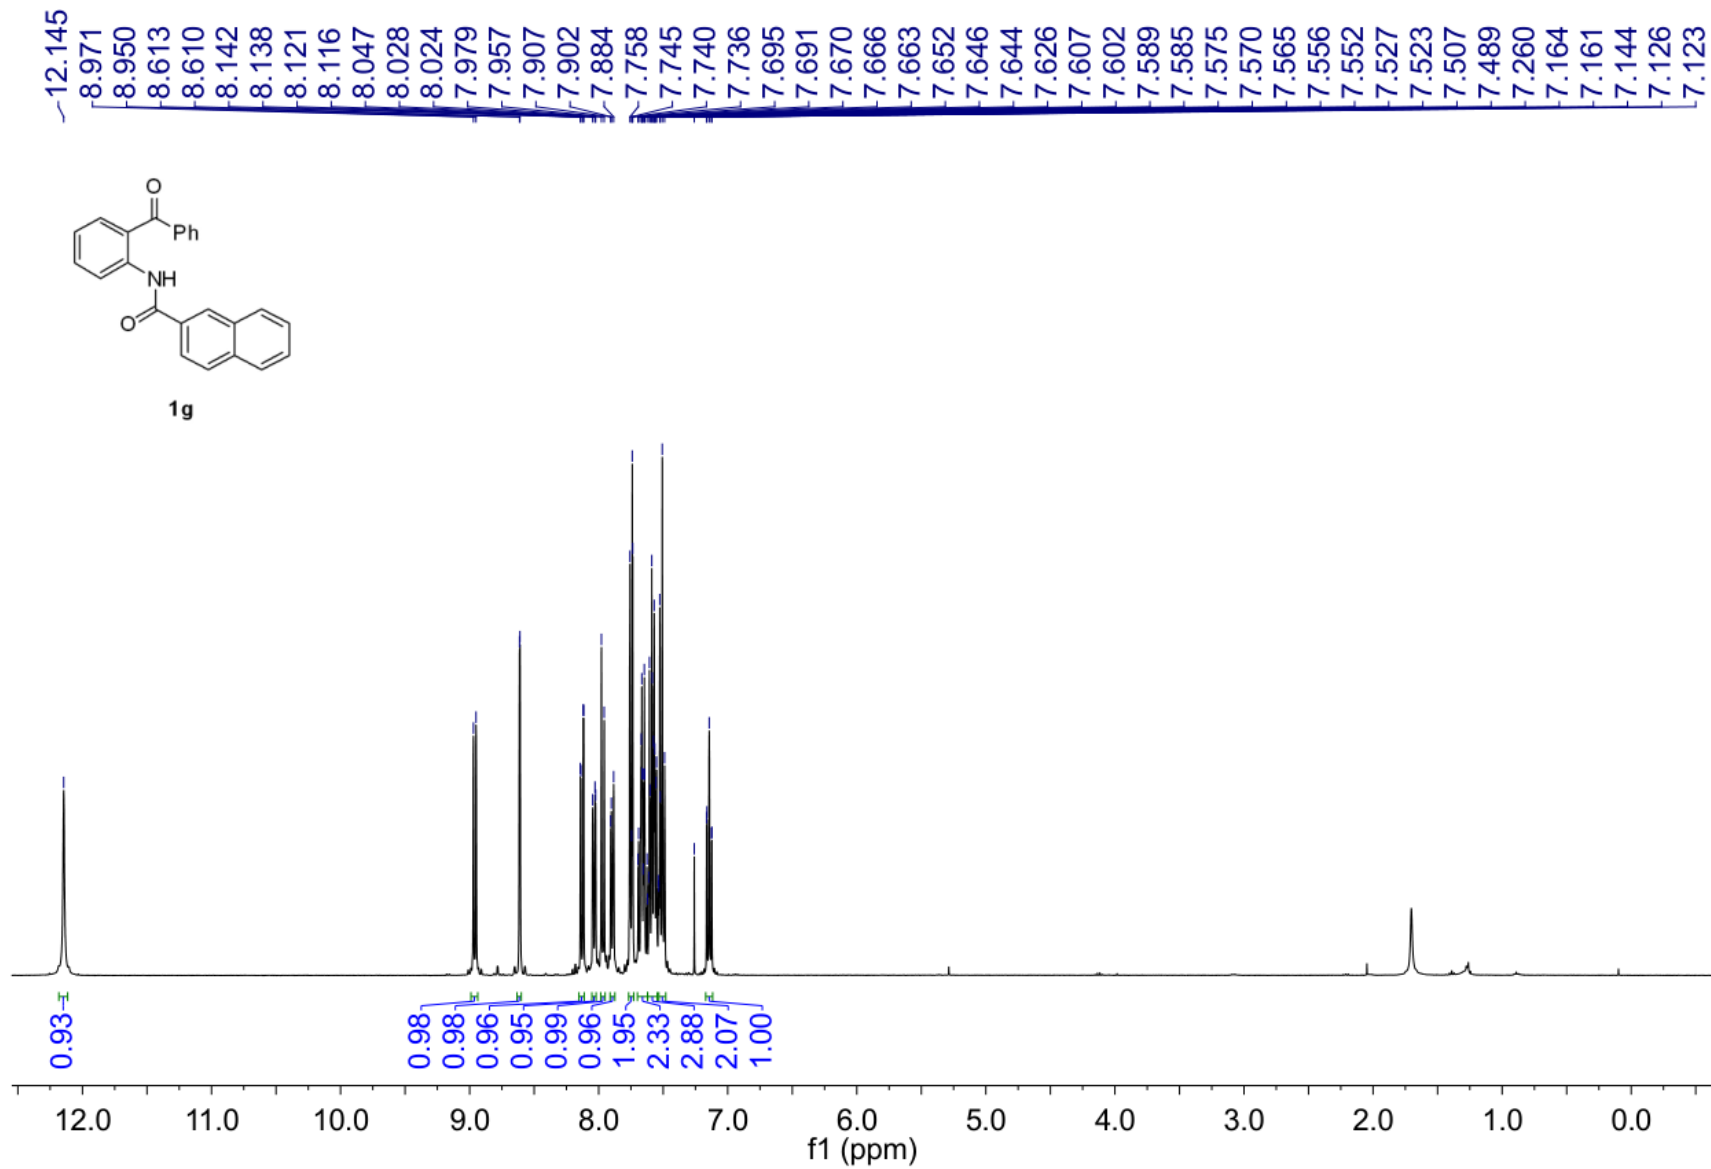

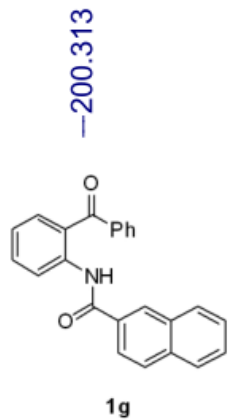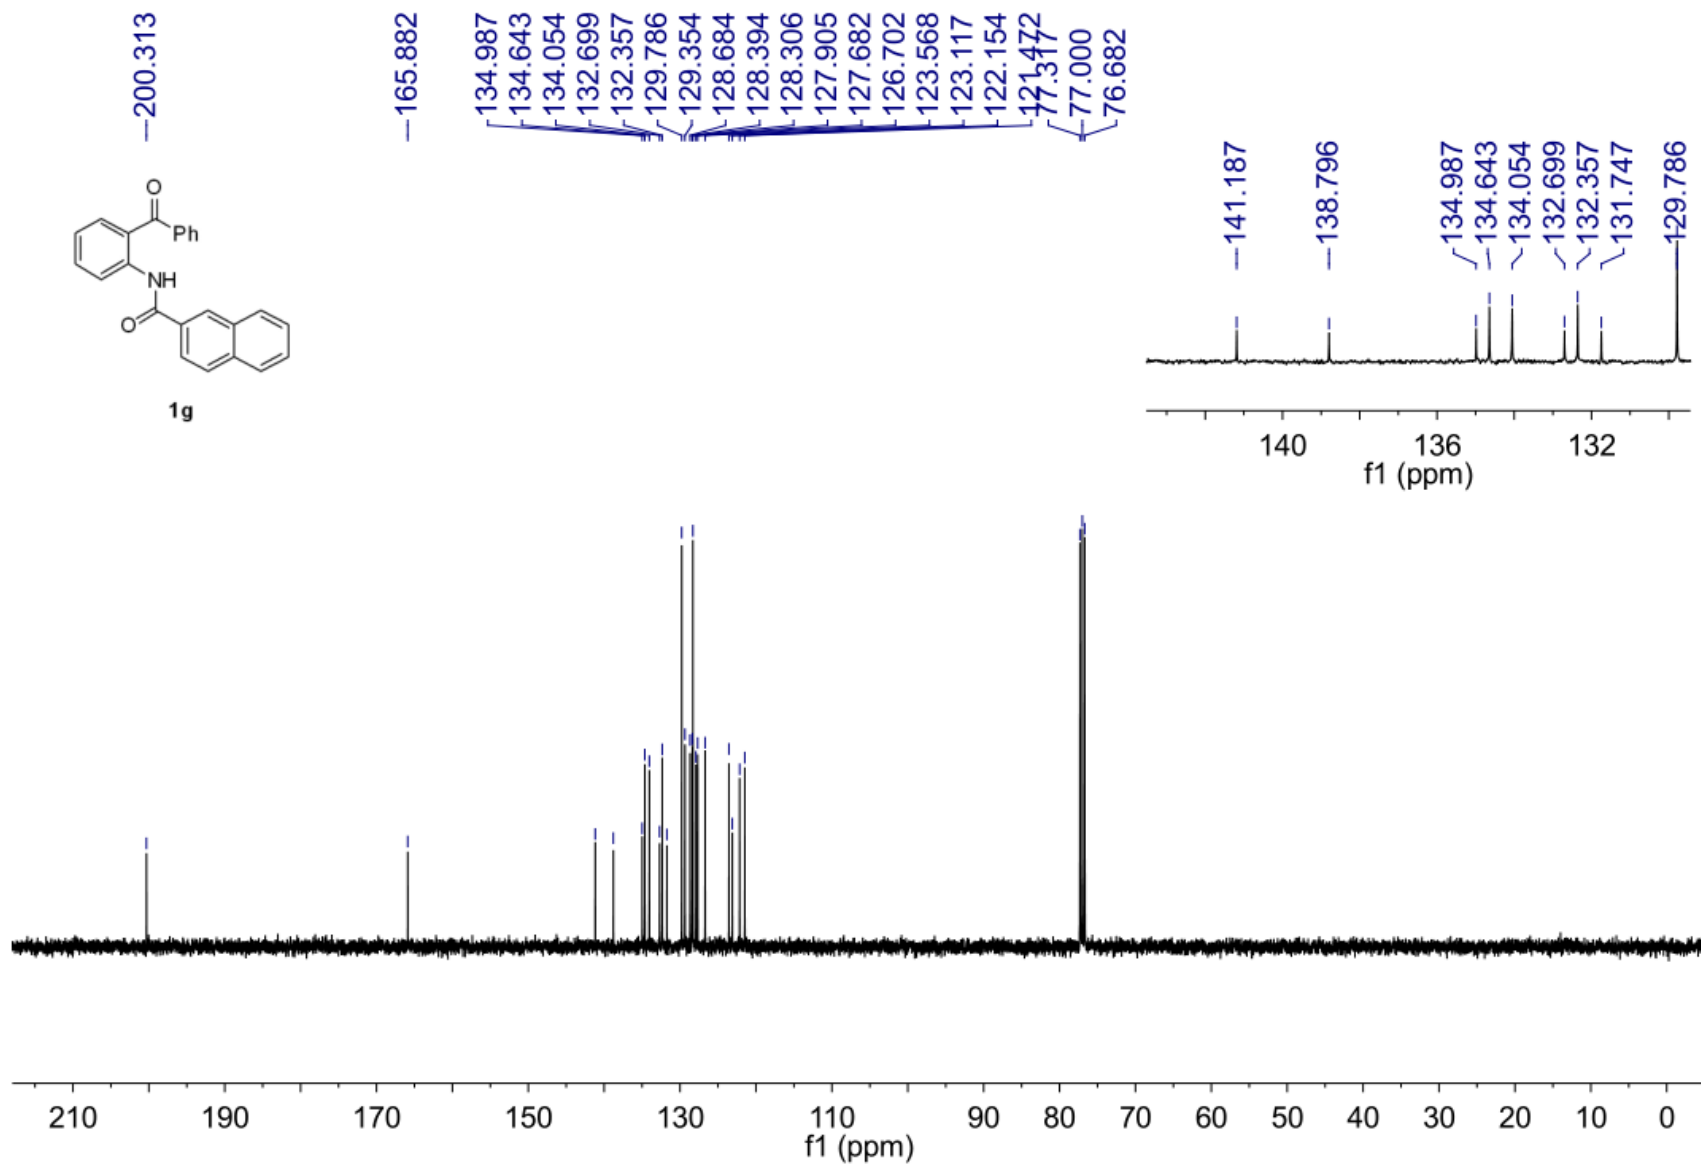

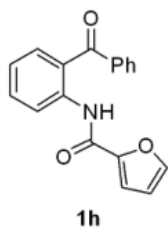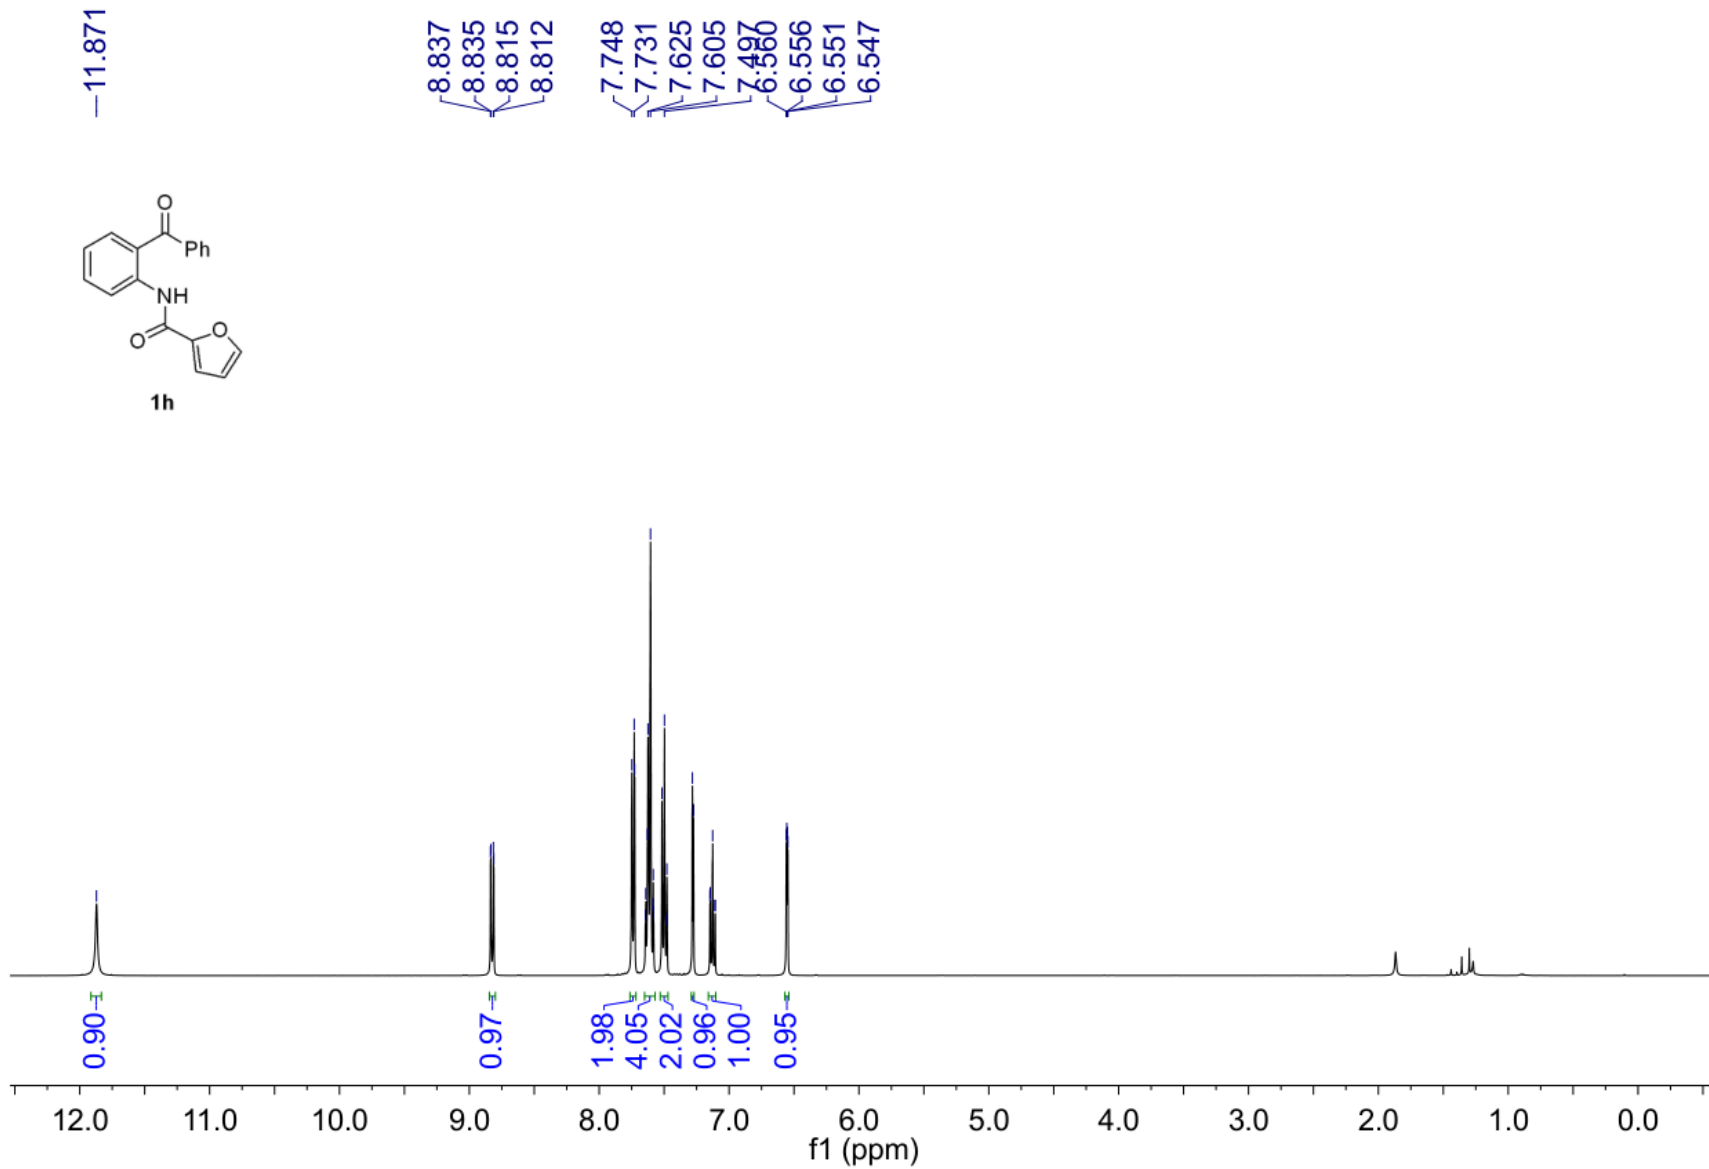

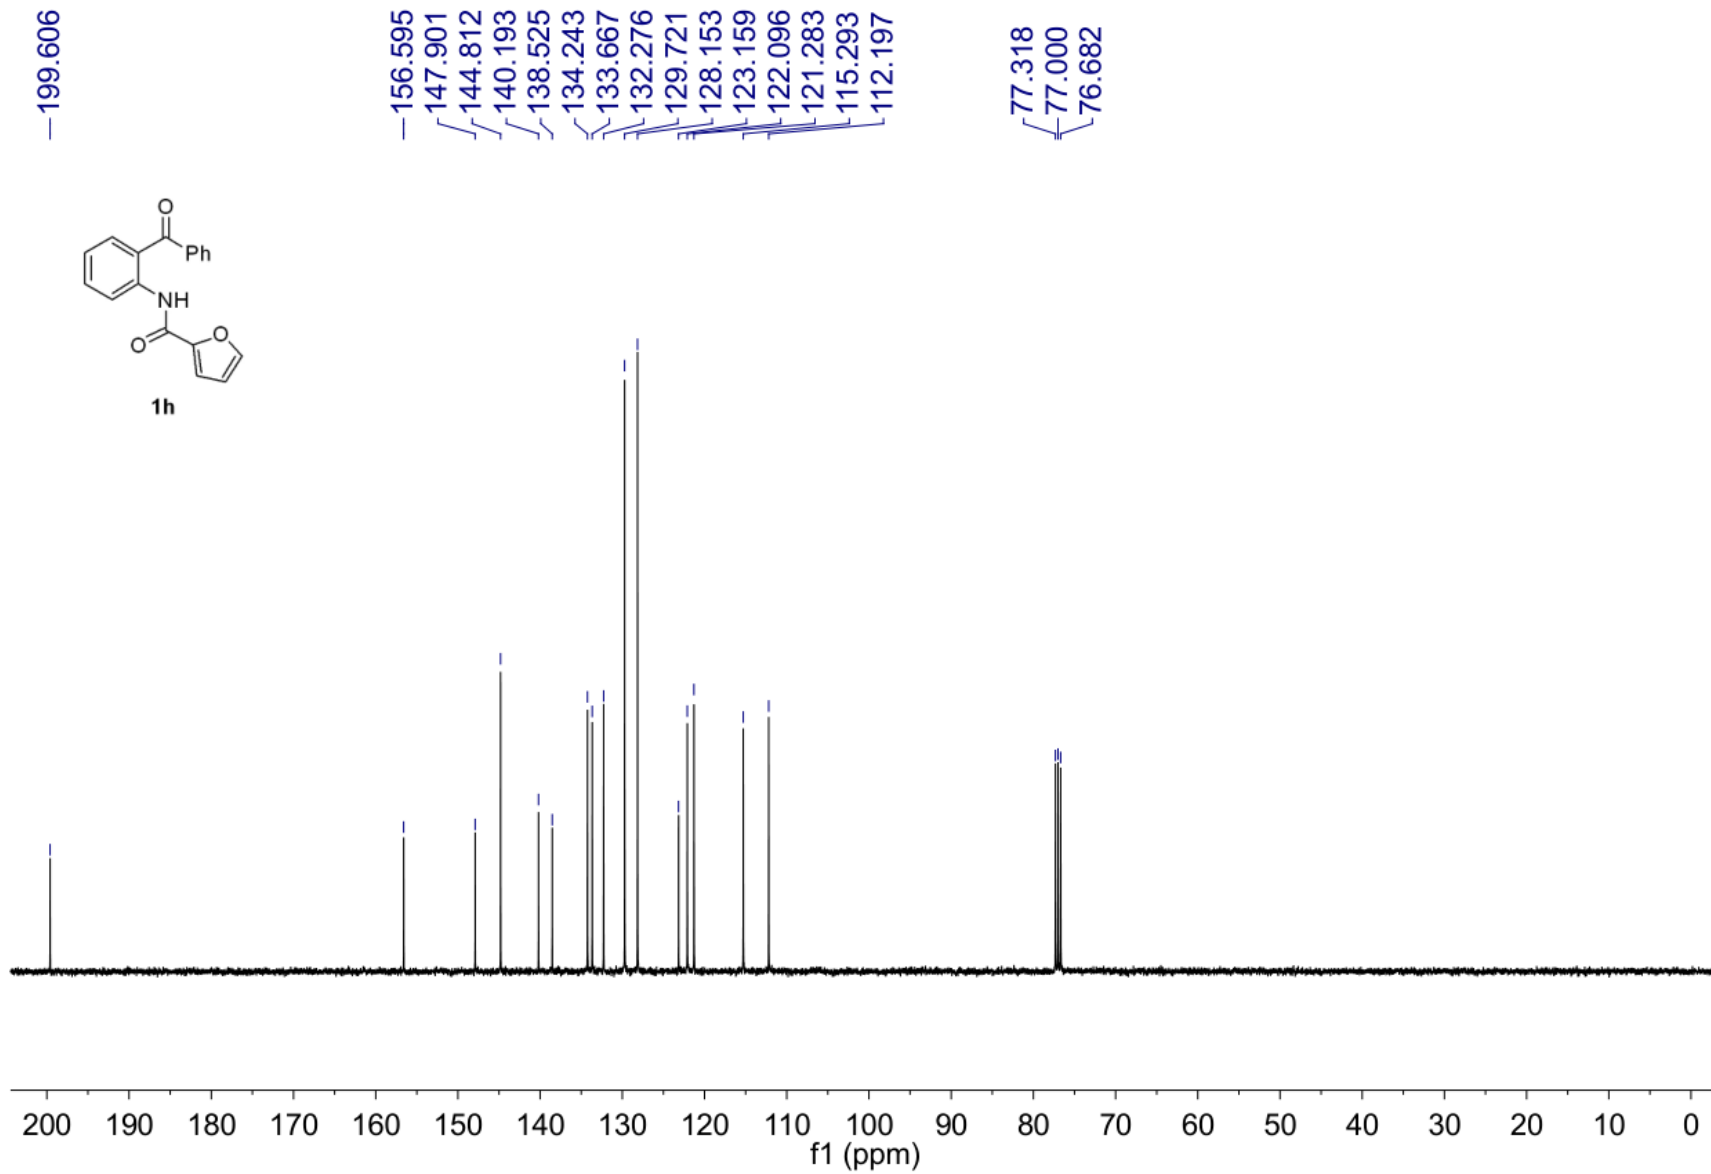



11.987

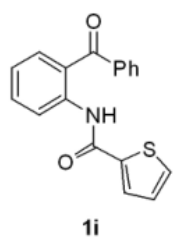

8.814  
8.792  
7.806  
7.798  
7.693  
7.675  
7.600  
7.581  
7.563  
7.544  
7.536  
7.524  
7.480  
7.461  
7.442  
7.116  
7.106  
7.094  
7.075  
7.056

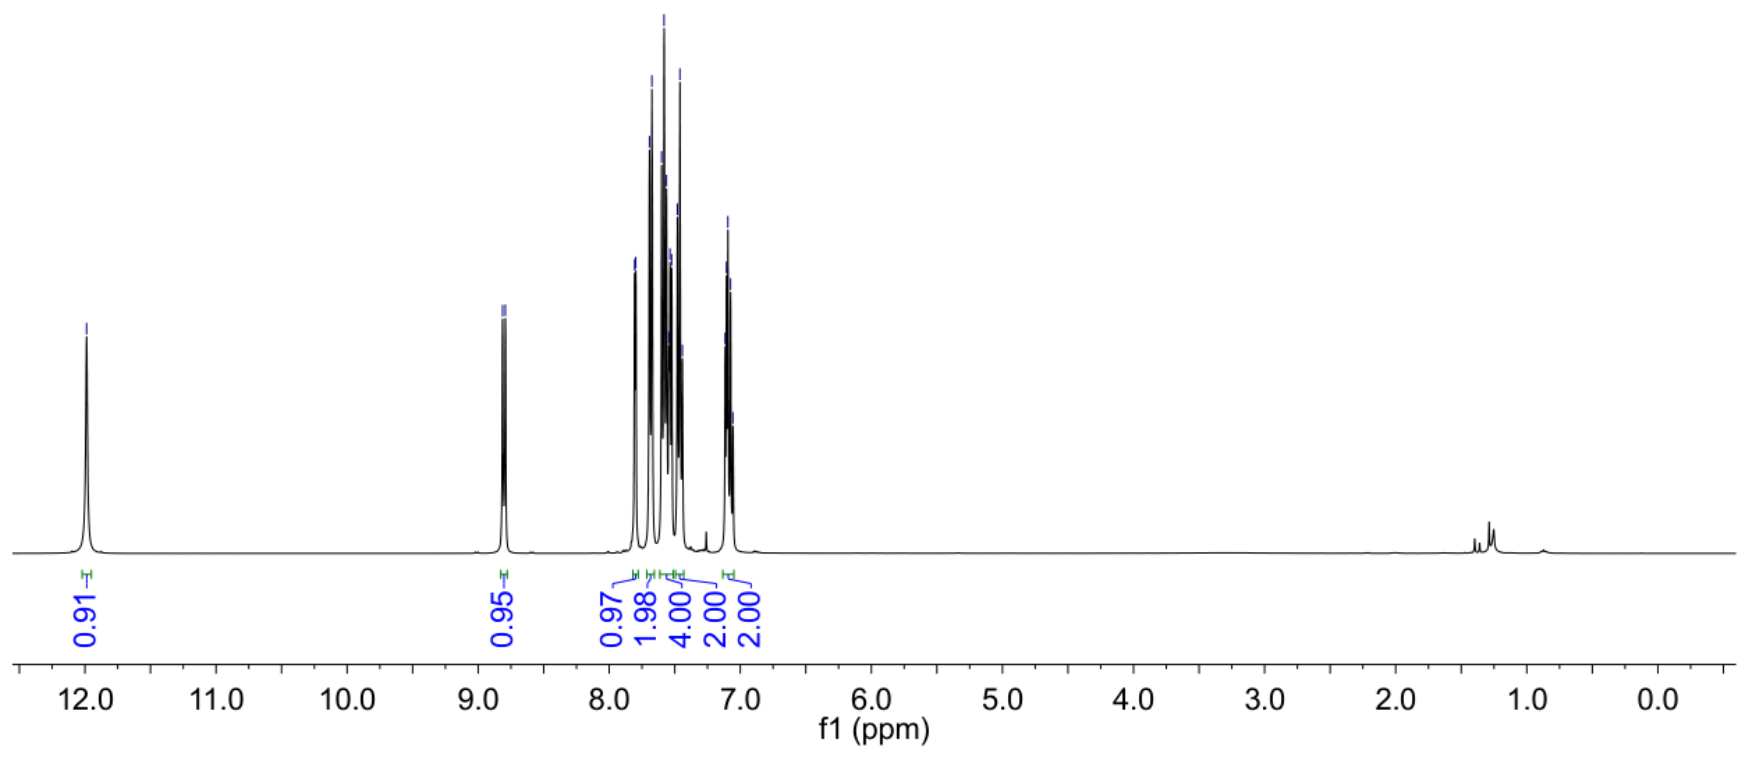

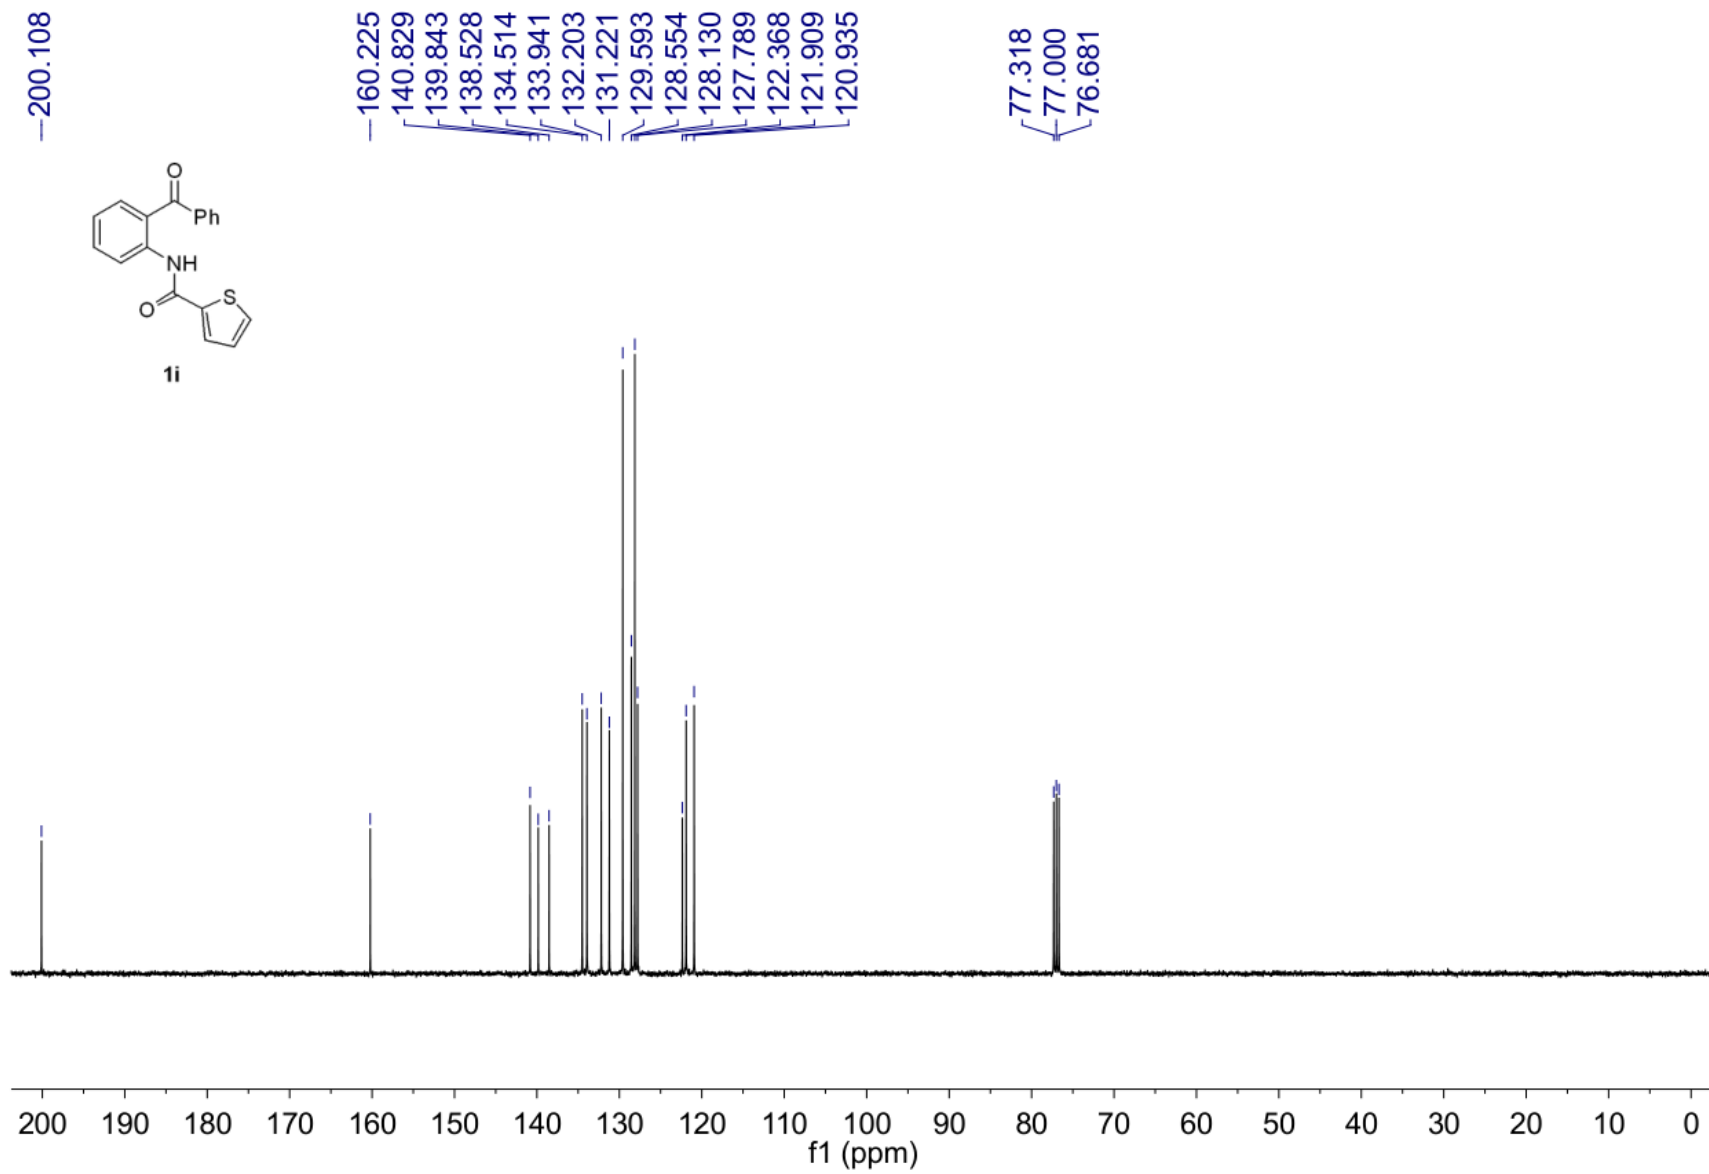

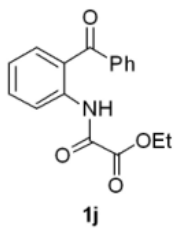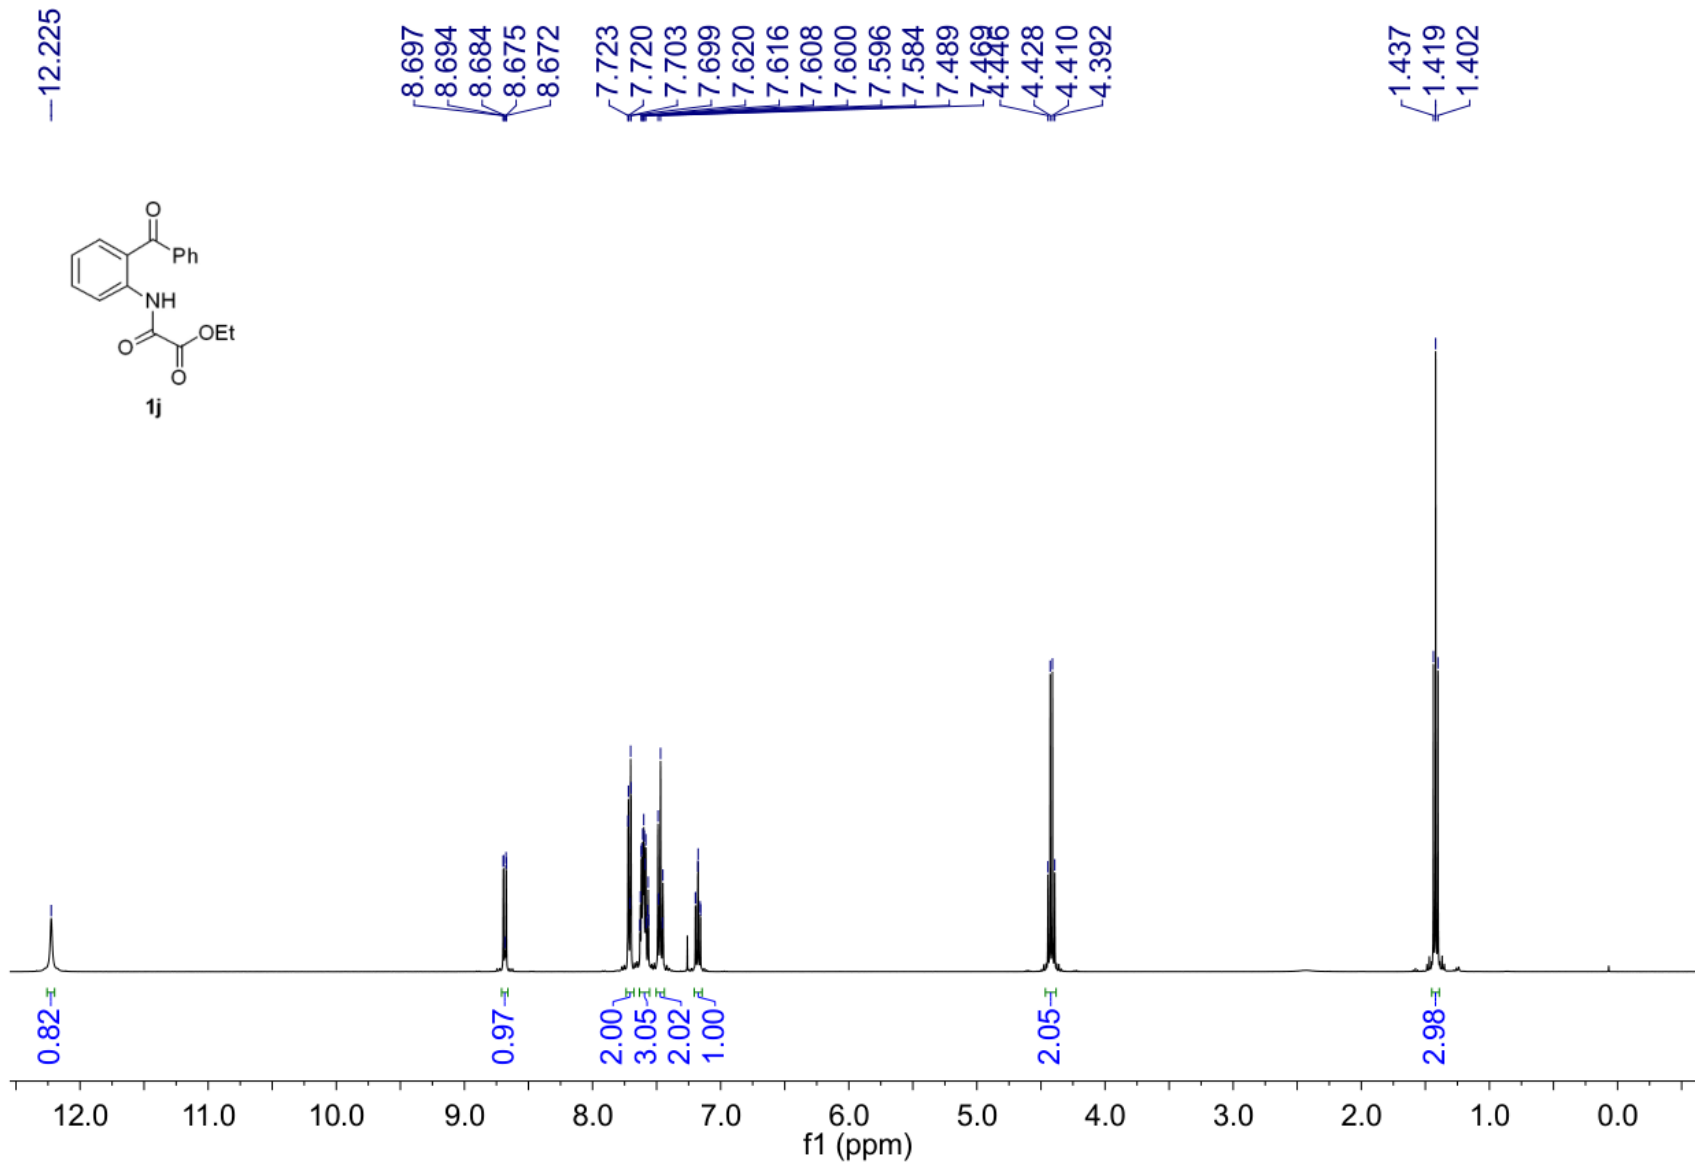

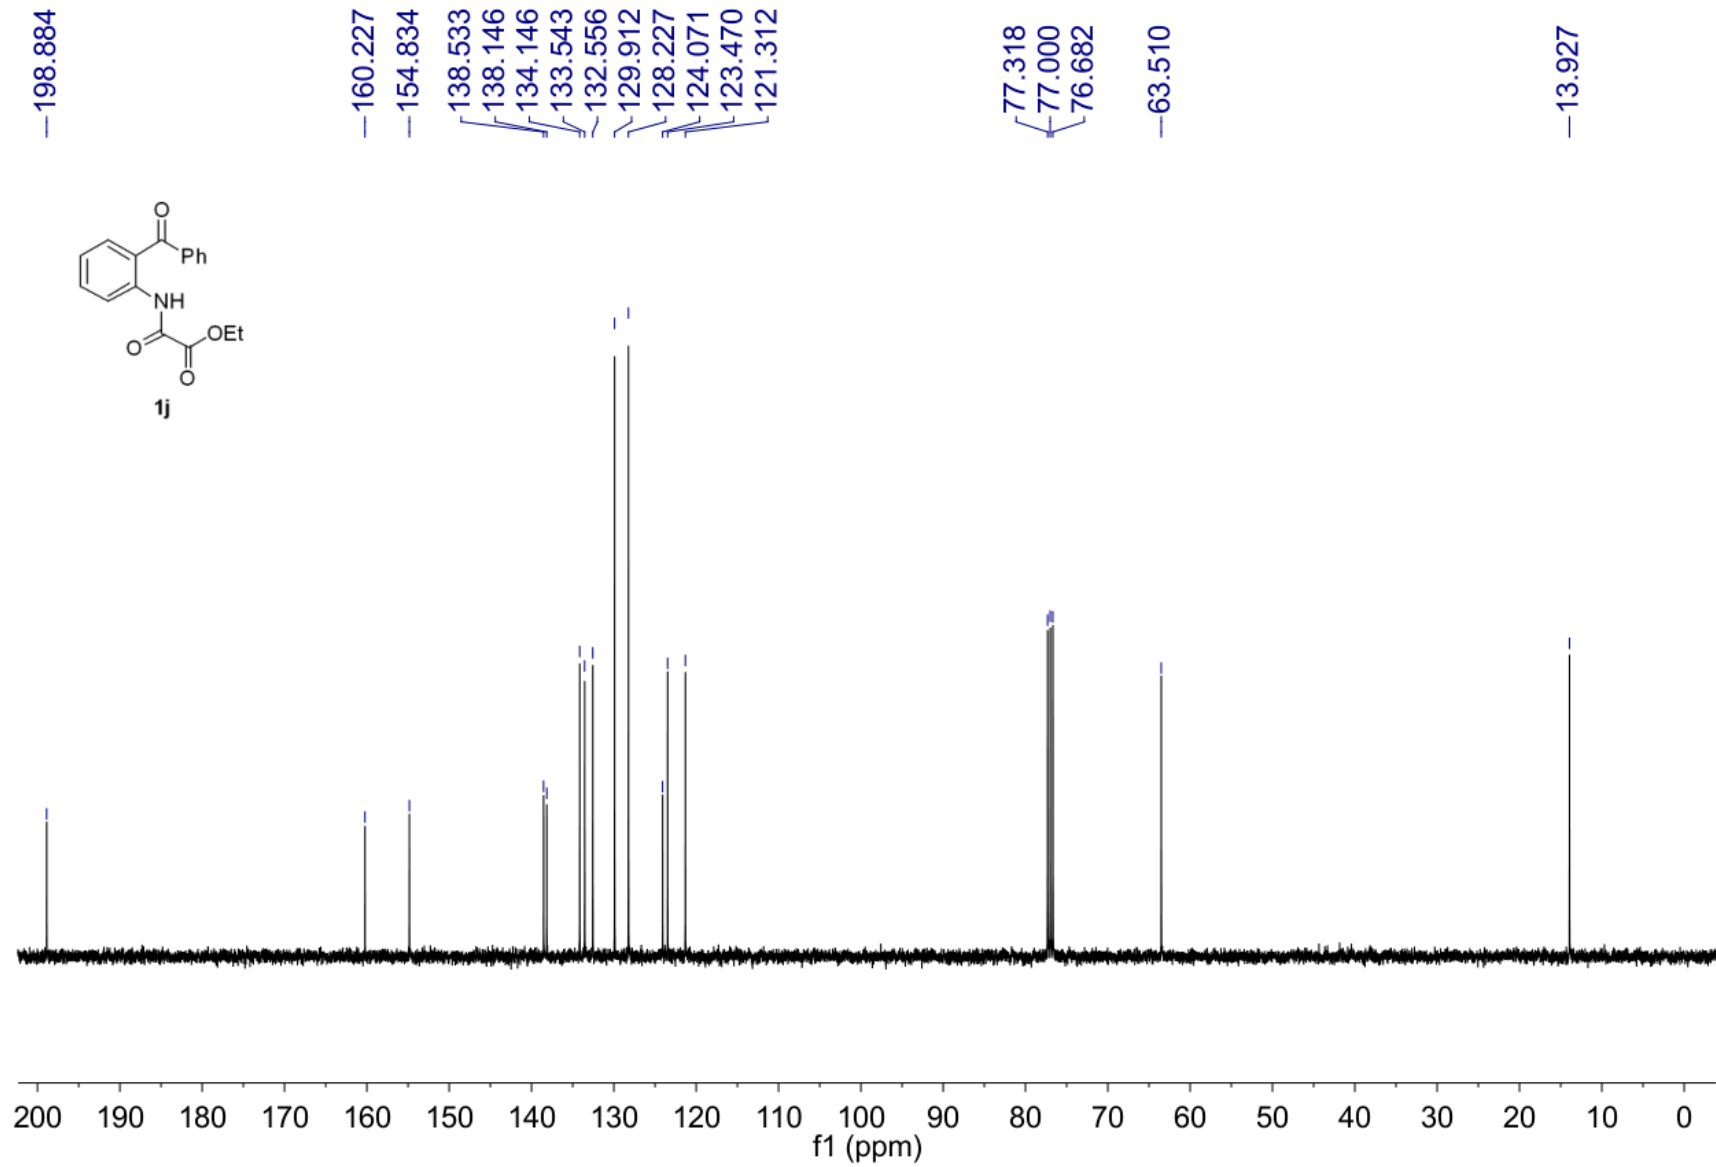

11.797

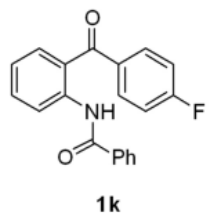

8.886  
8.884  
8.865  
8.863  
8.064  
8.061  
8.057  
8.045  
8.040  
7.785  
7.771  
7.767  
7.766  
7.762  
7.749  
7.648  
7.645  
7.602  
7.598  
7.582  
7.578  
7.556  
7.542  
7.539  
7.535  
7.528  
7.525  
7.516  
7.514  
7.510  
7.196  
7.179  
7.175  
7.157  
7.153  
7.137  
7.135  
7.118

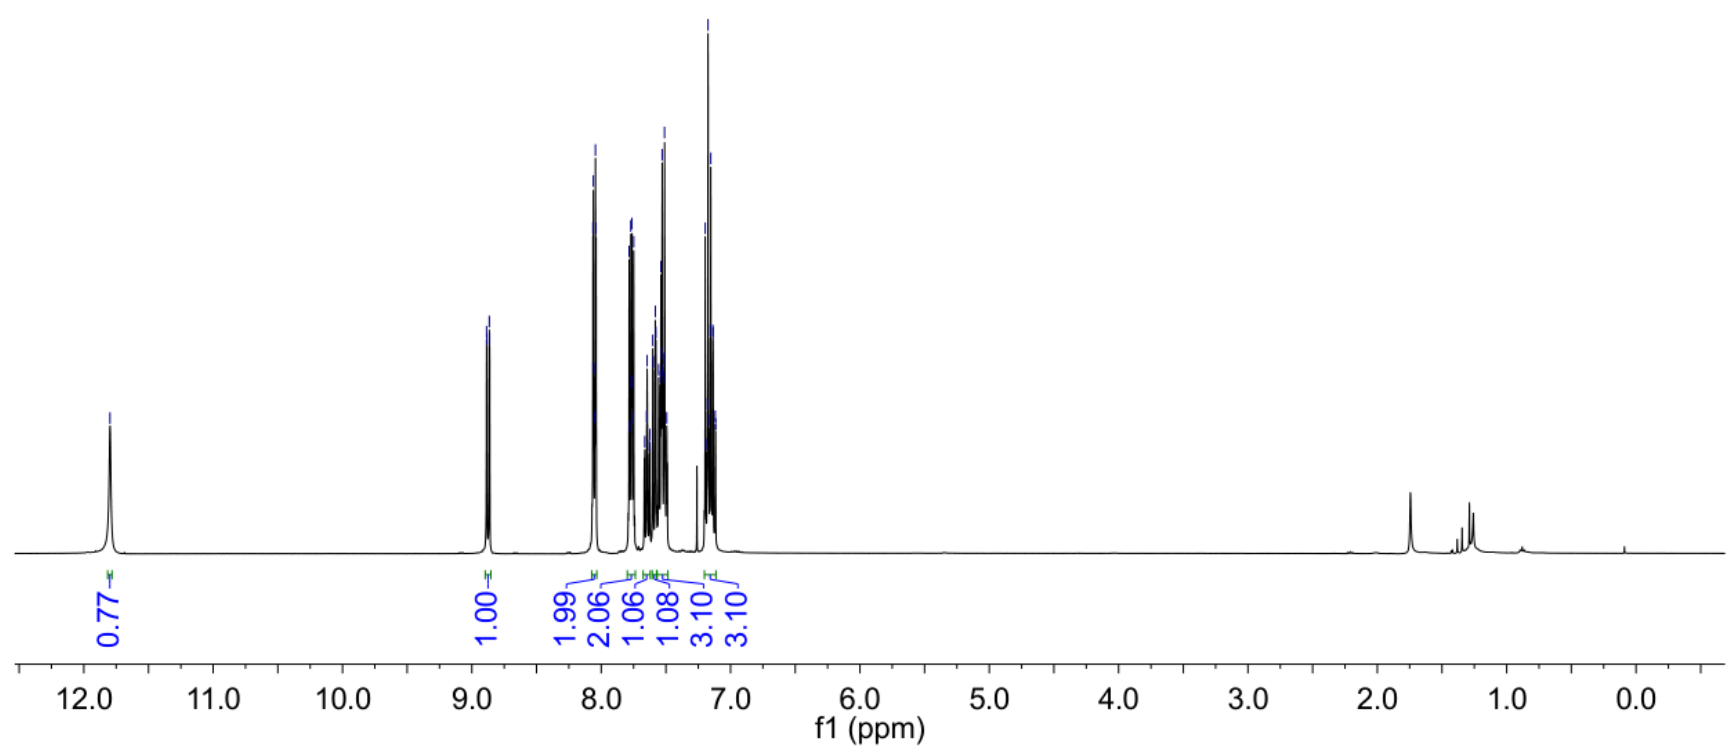

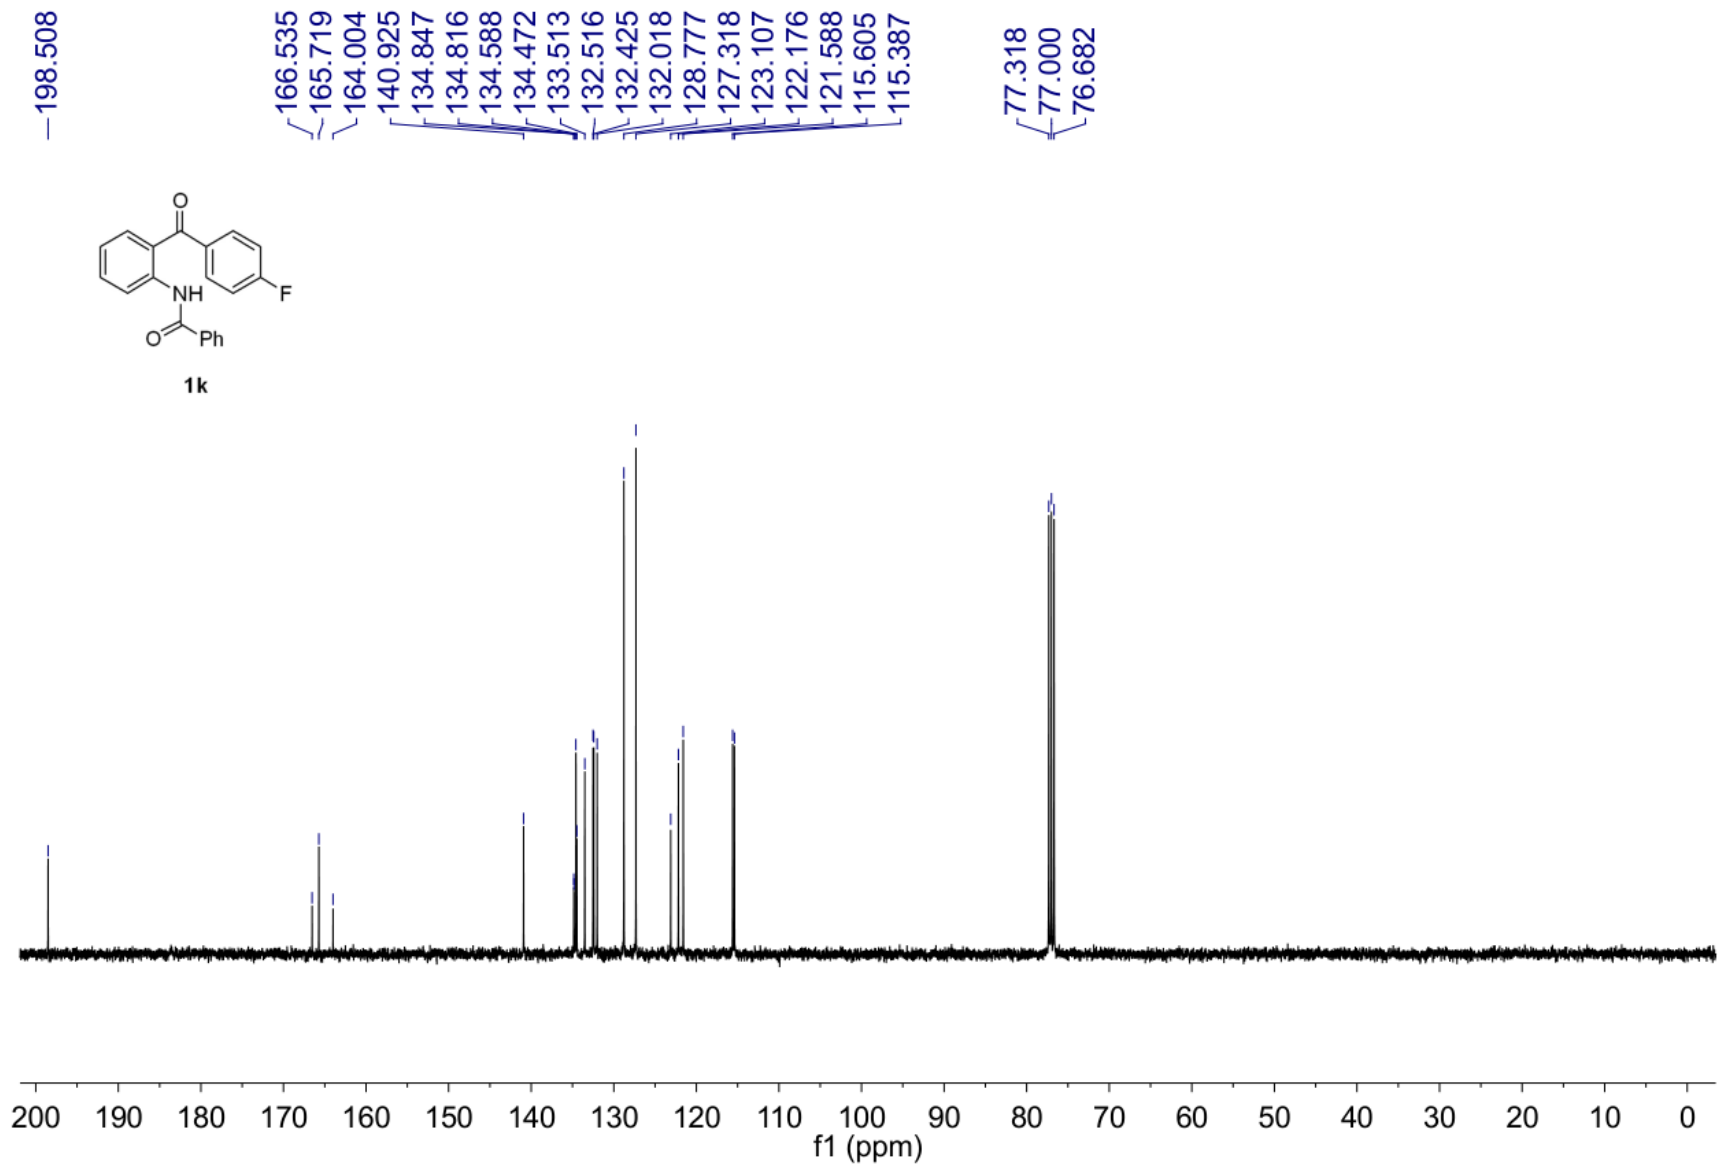

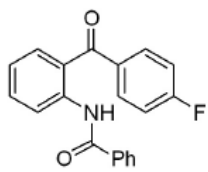

1k

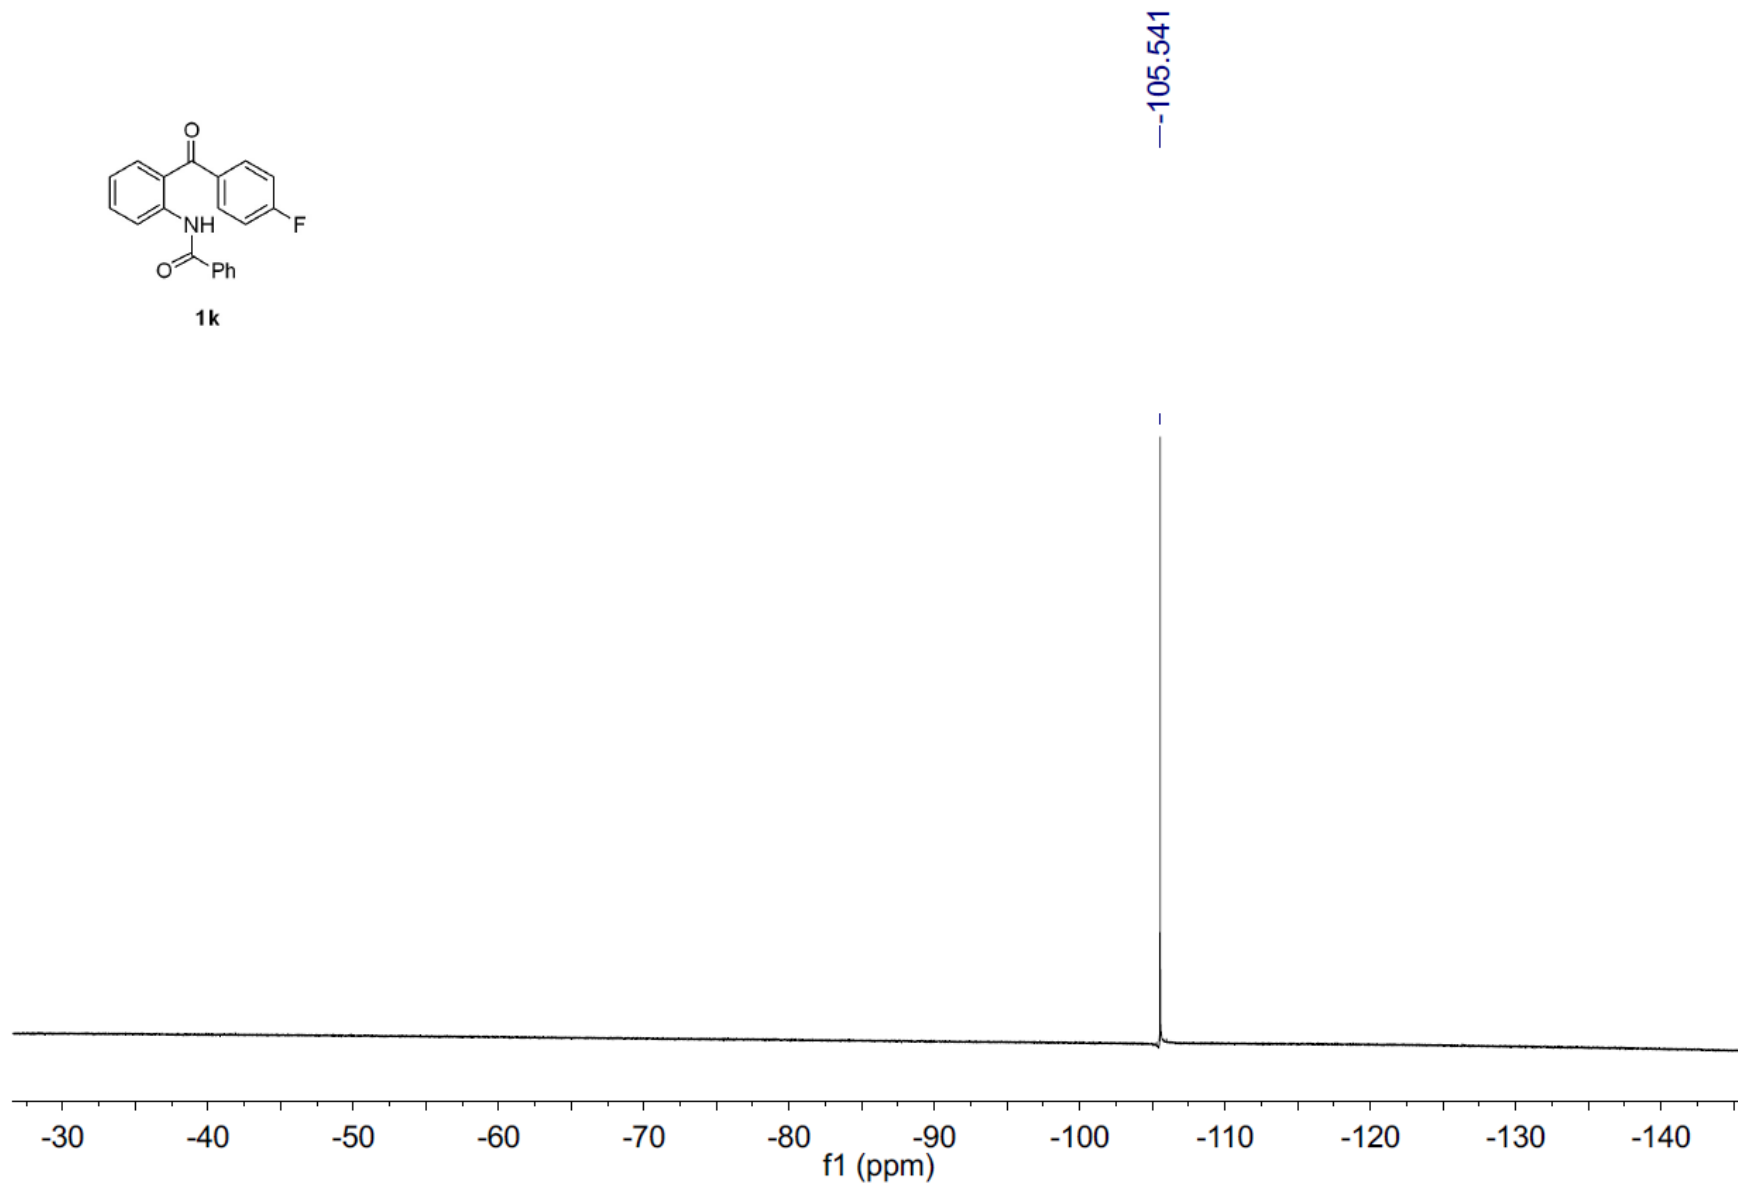

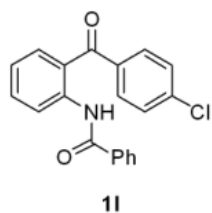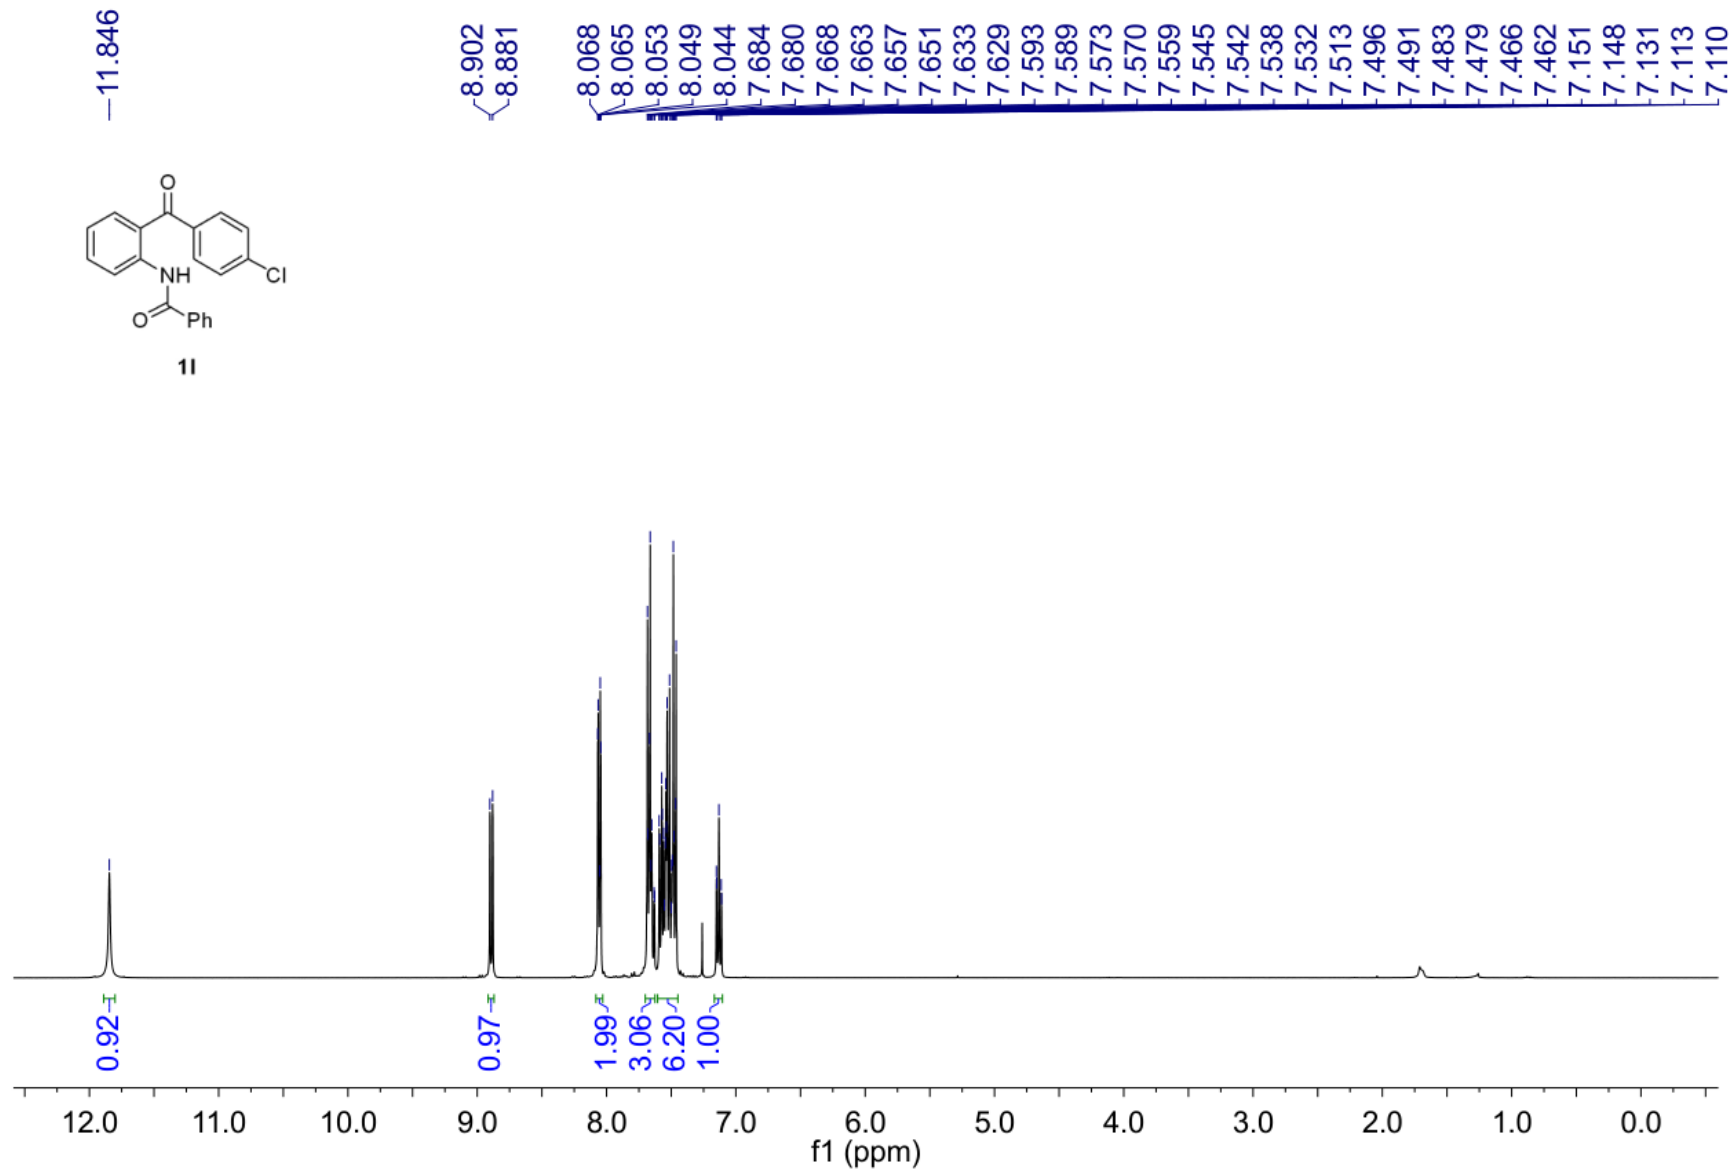



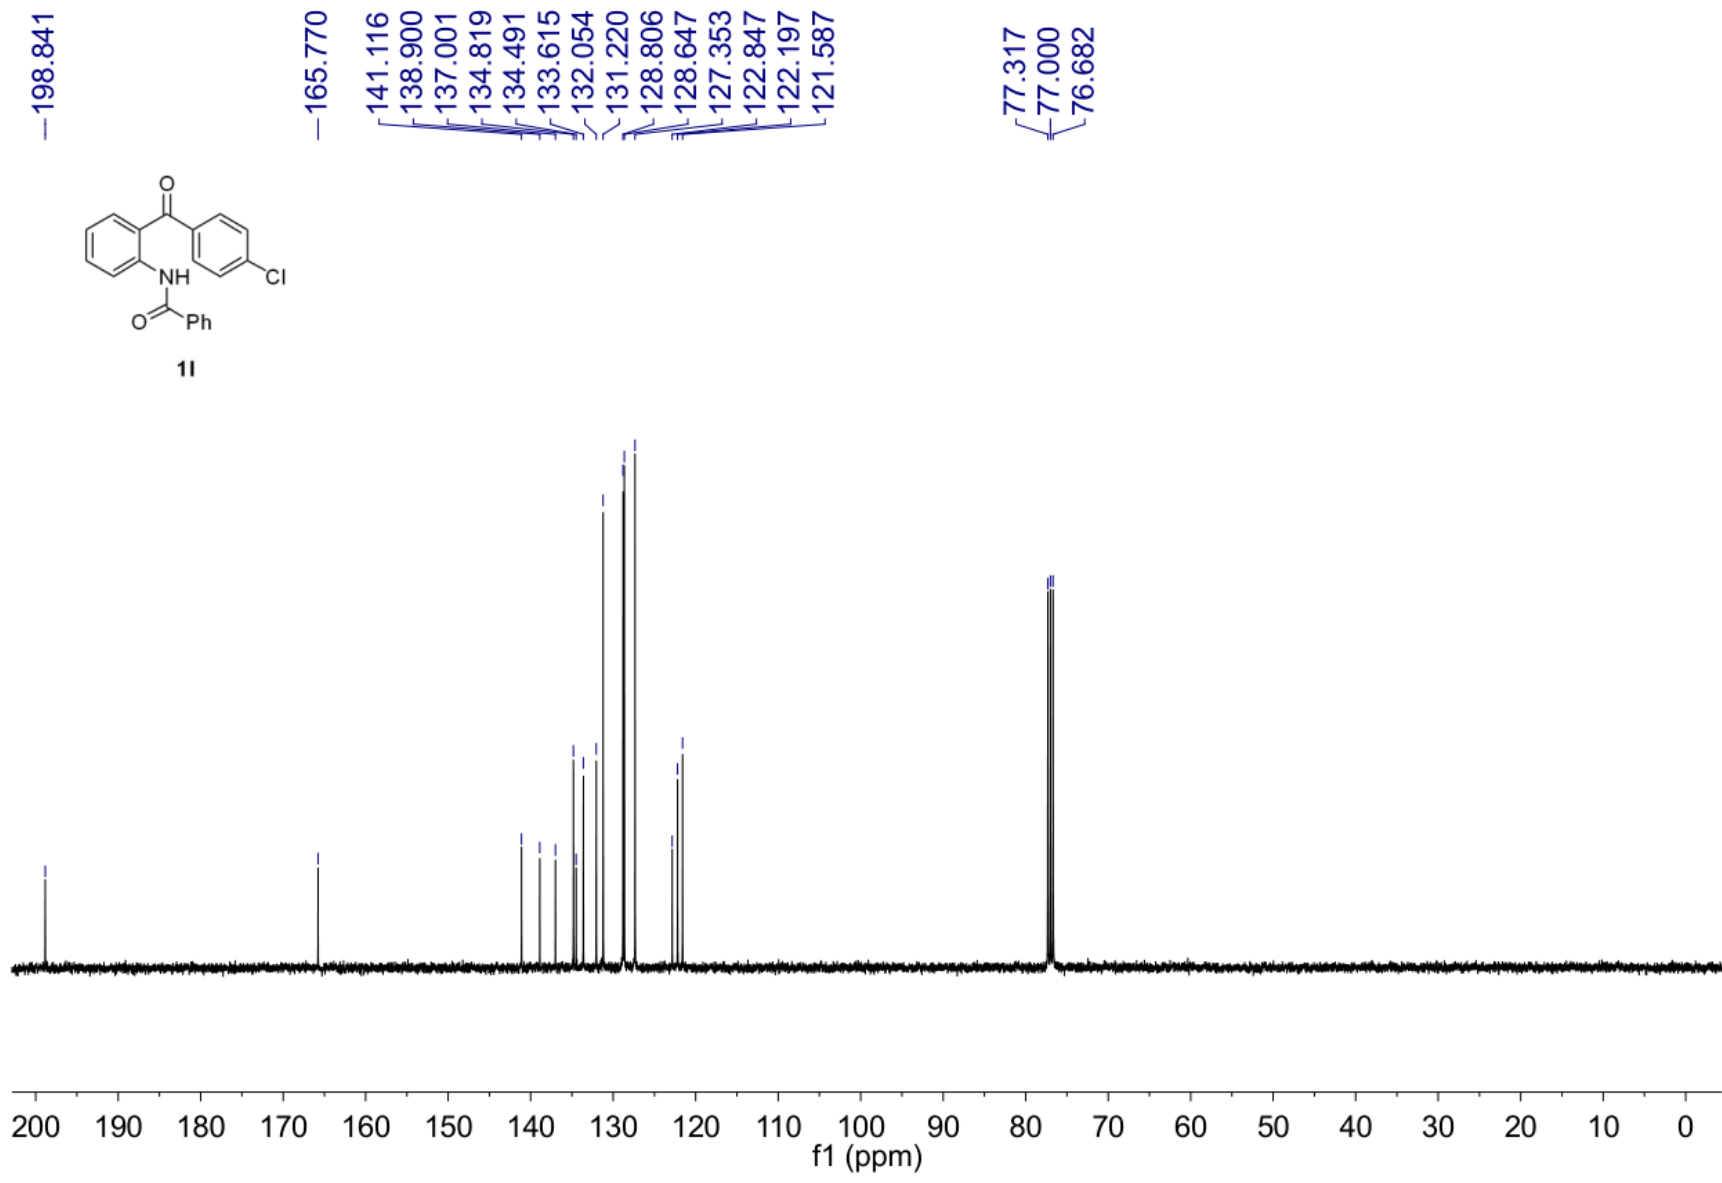

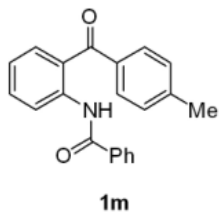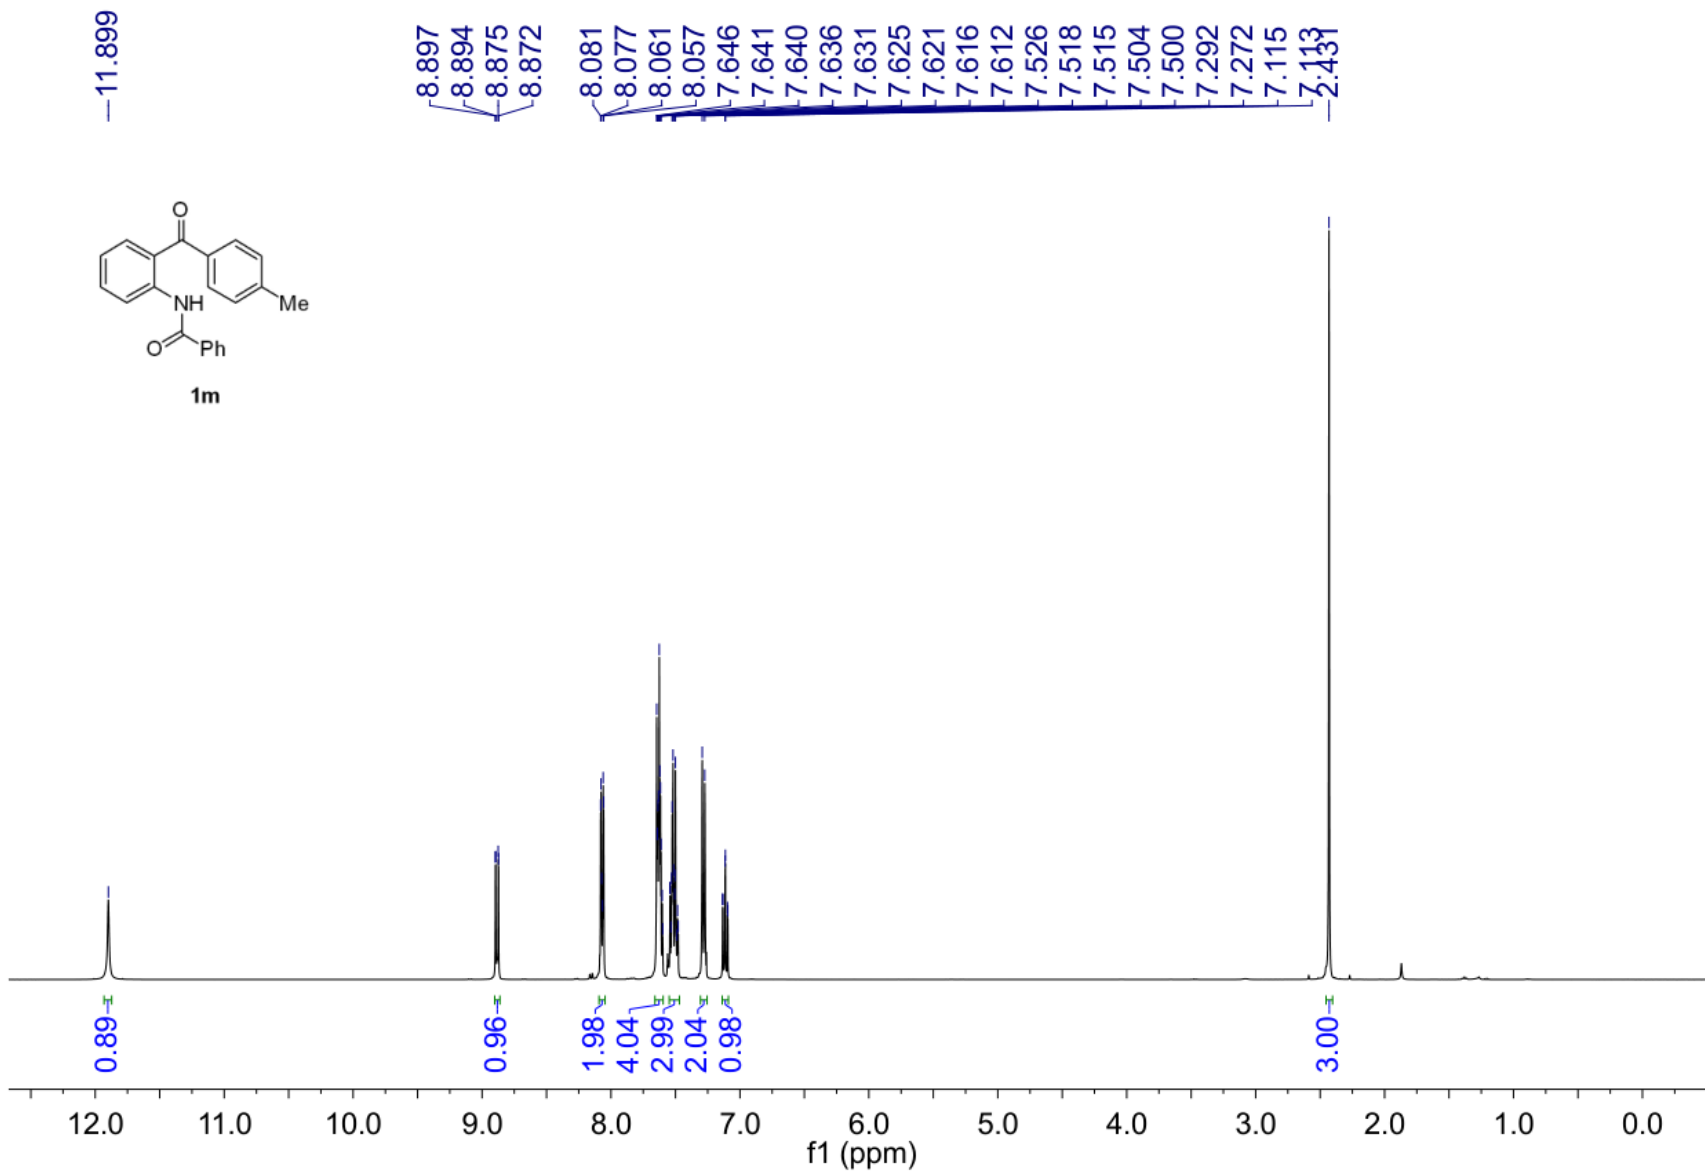

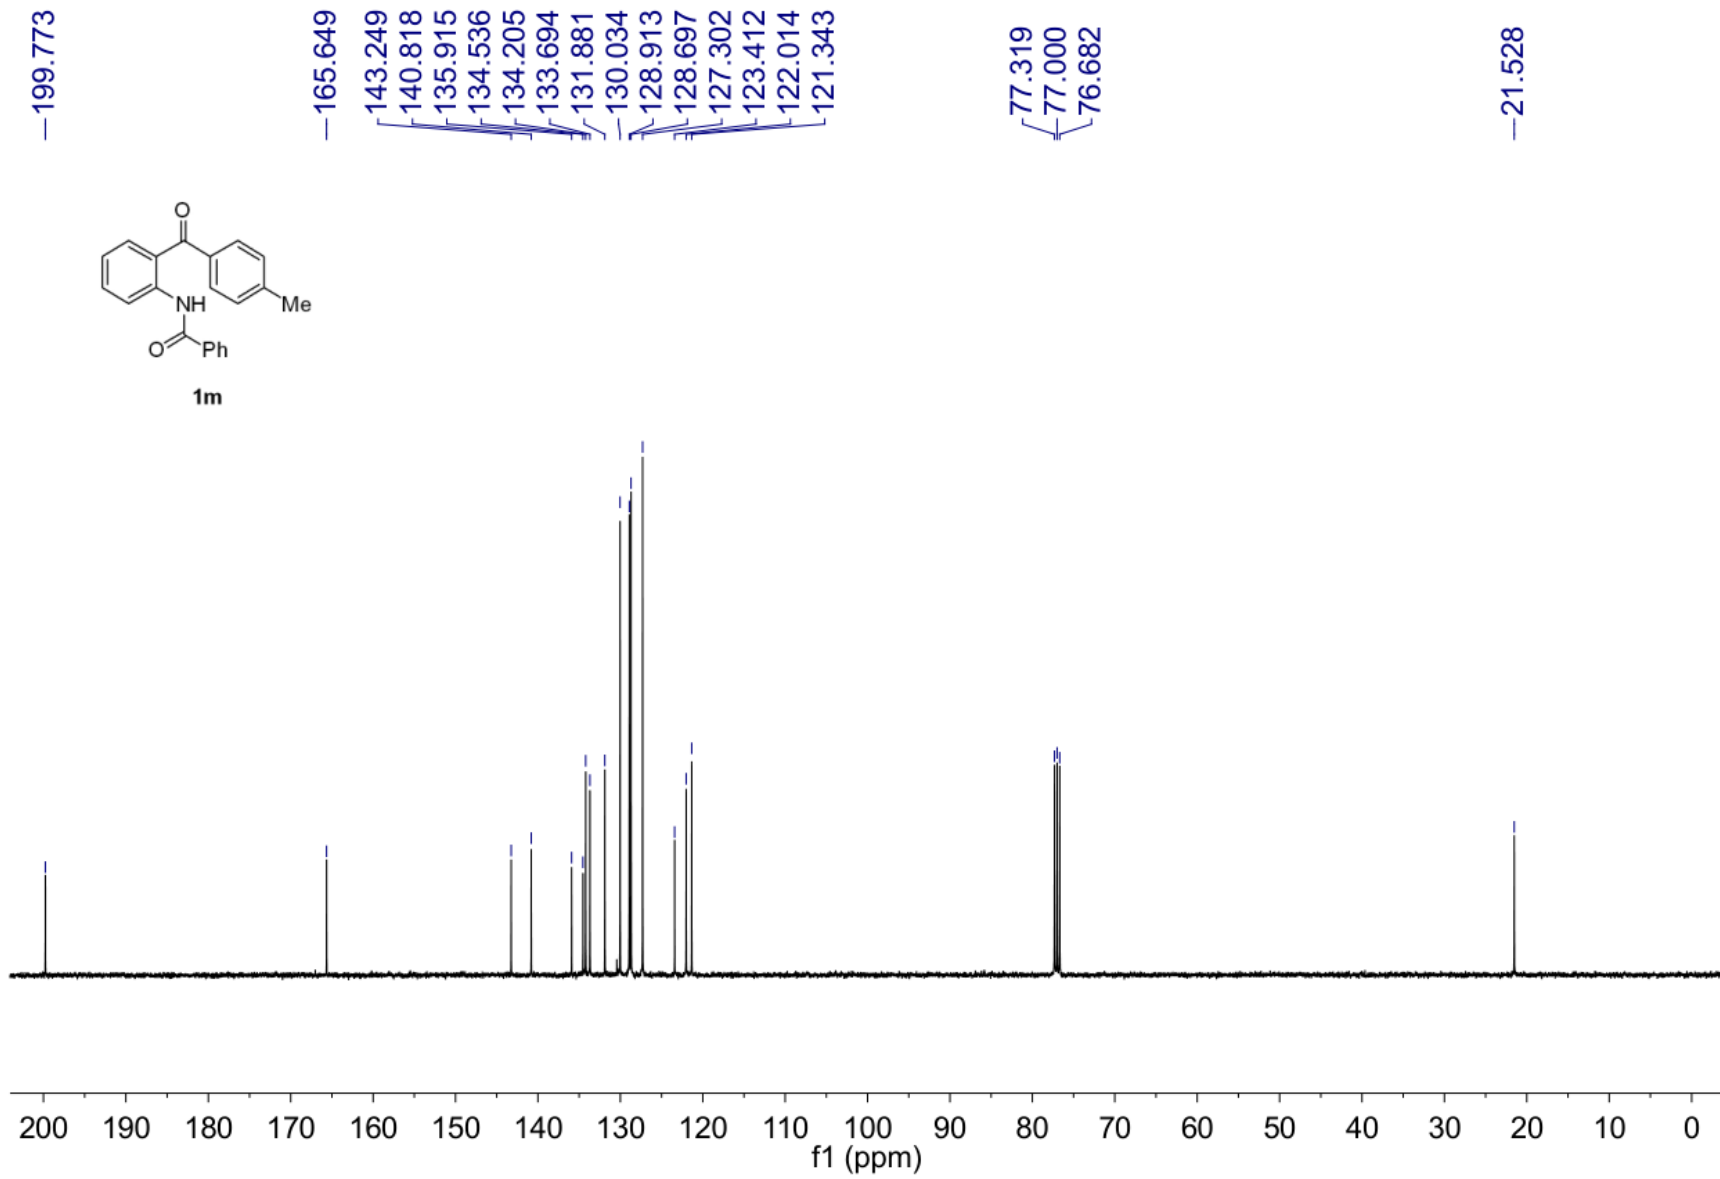

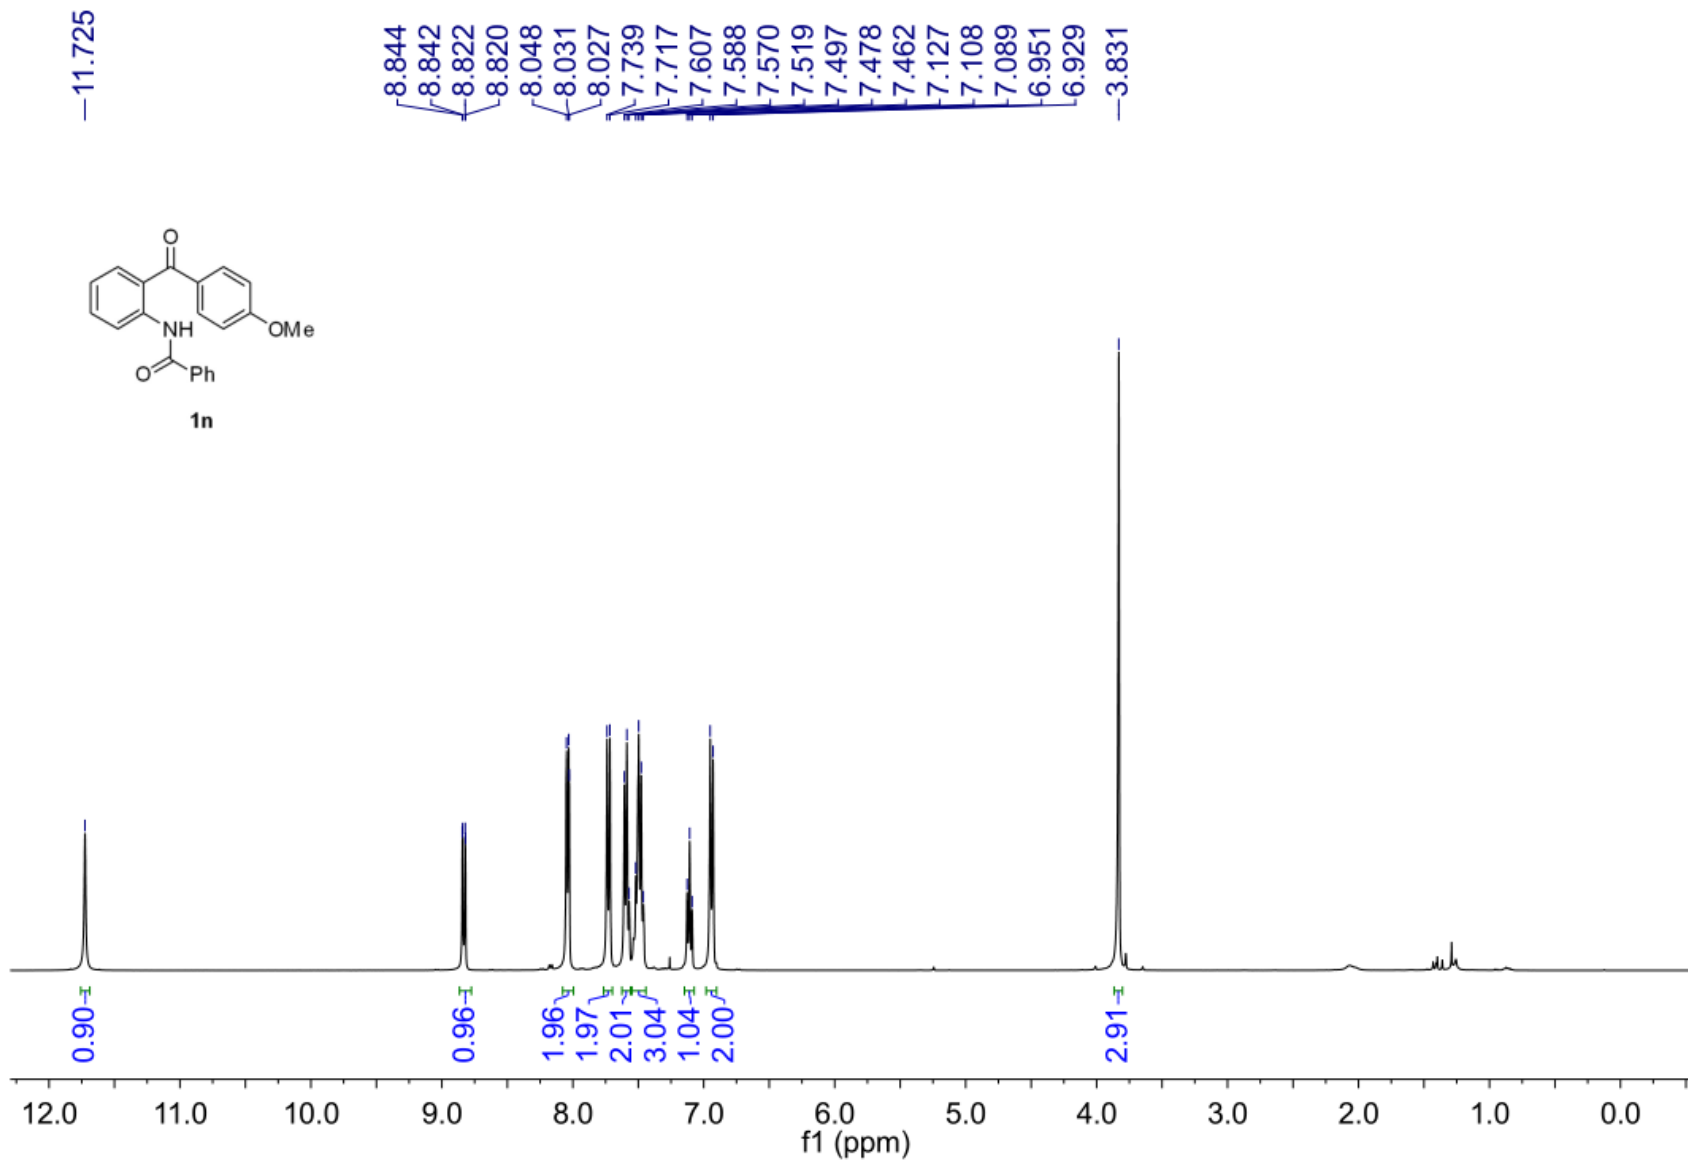

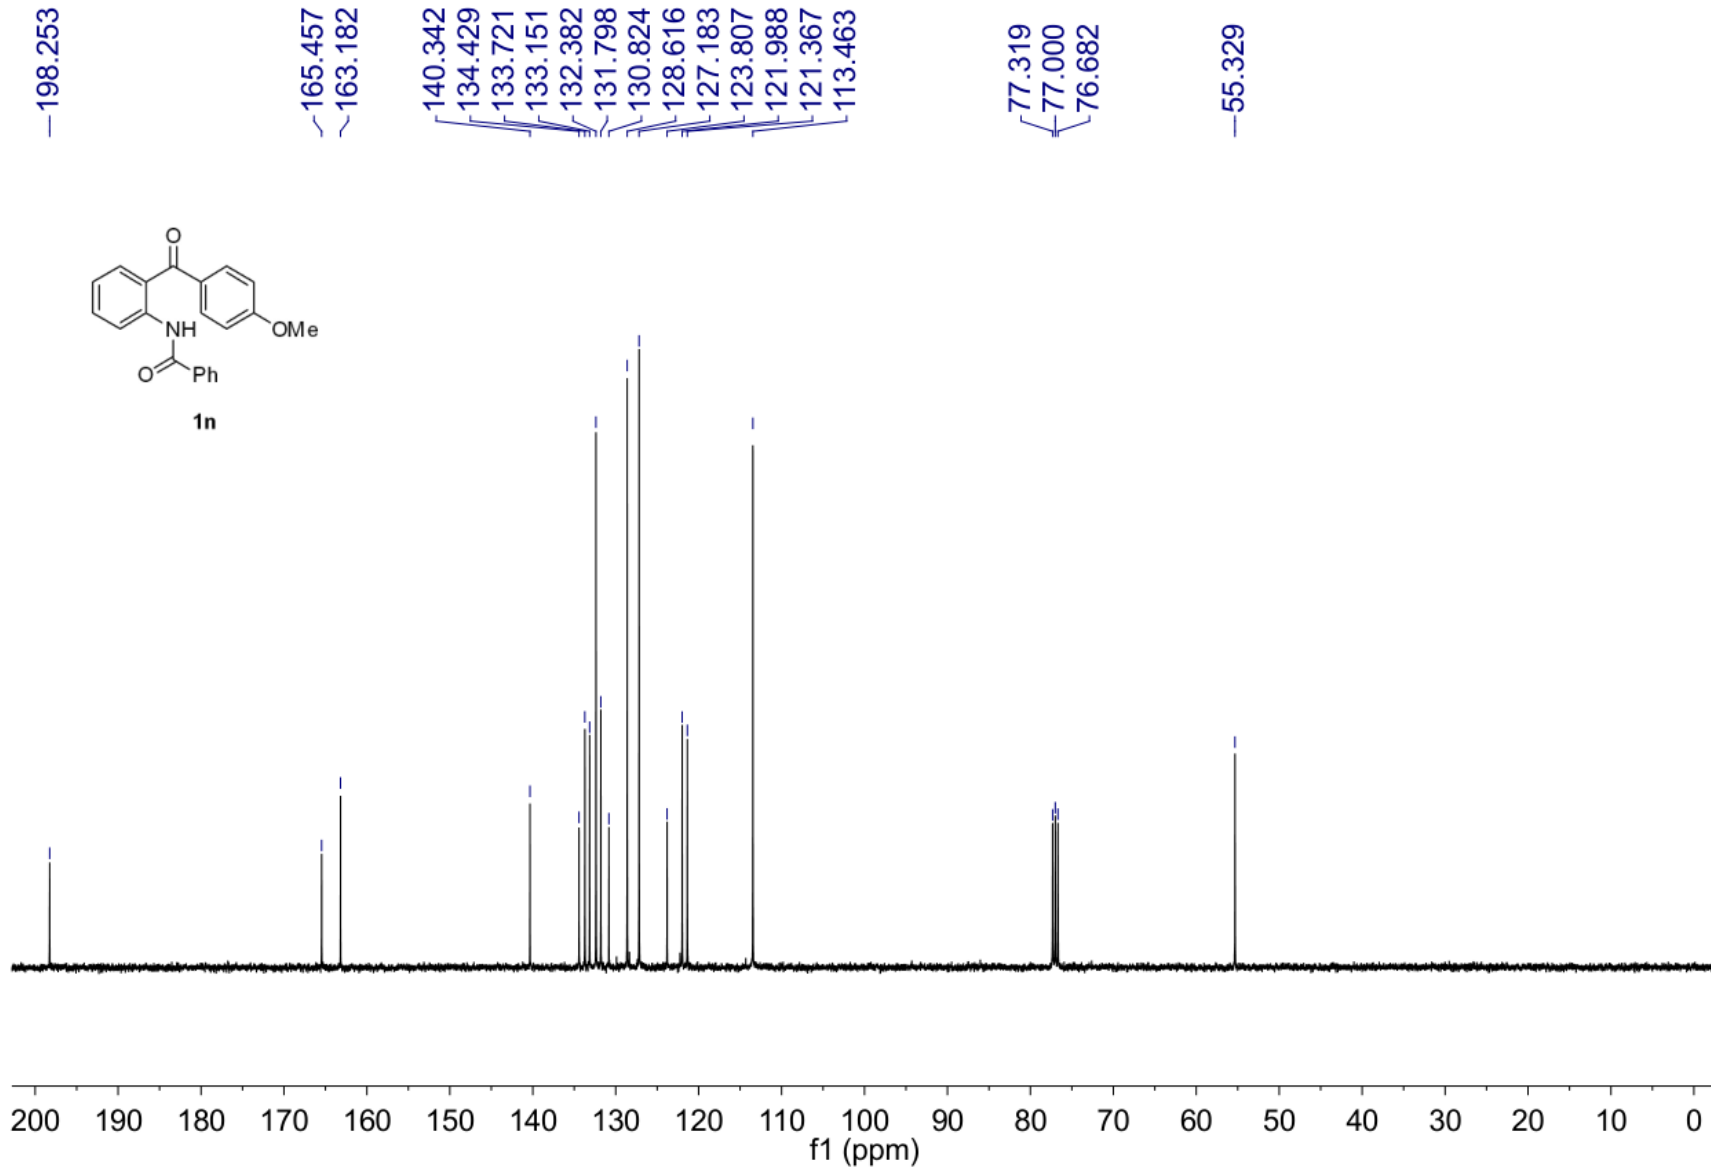

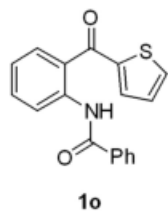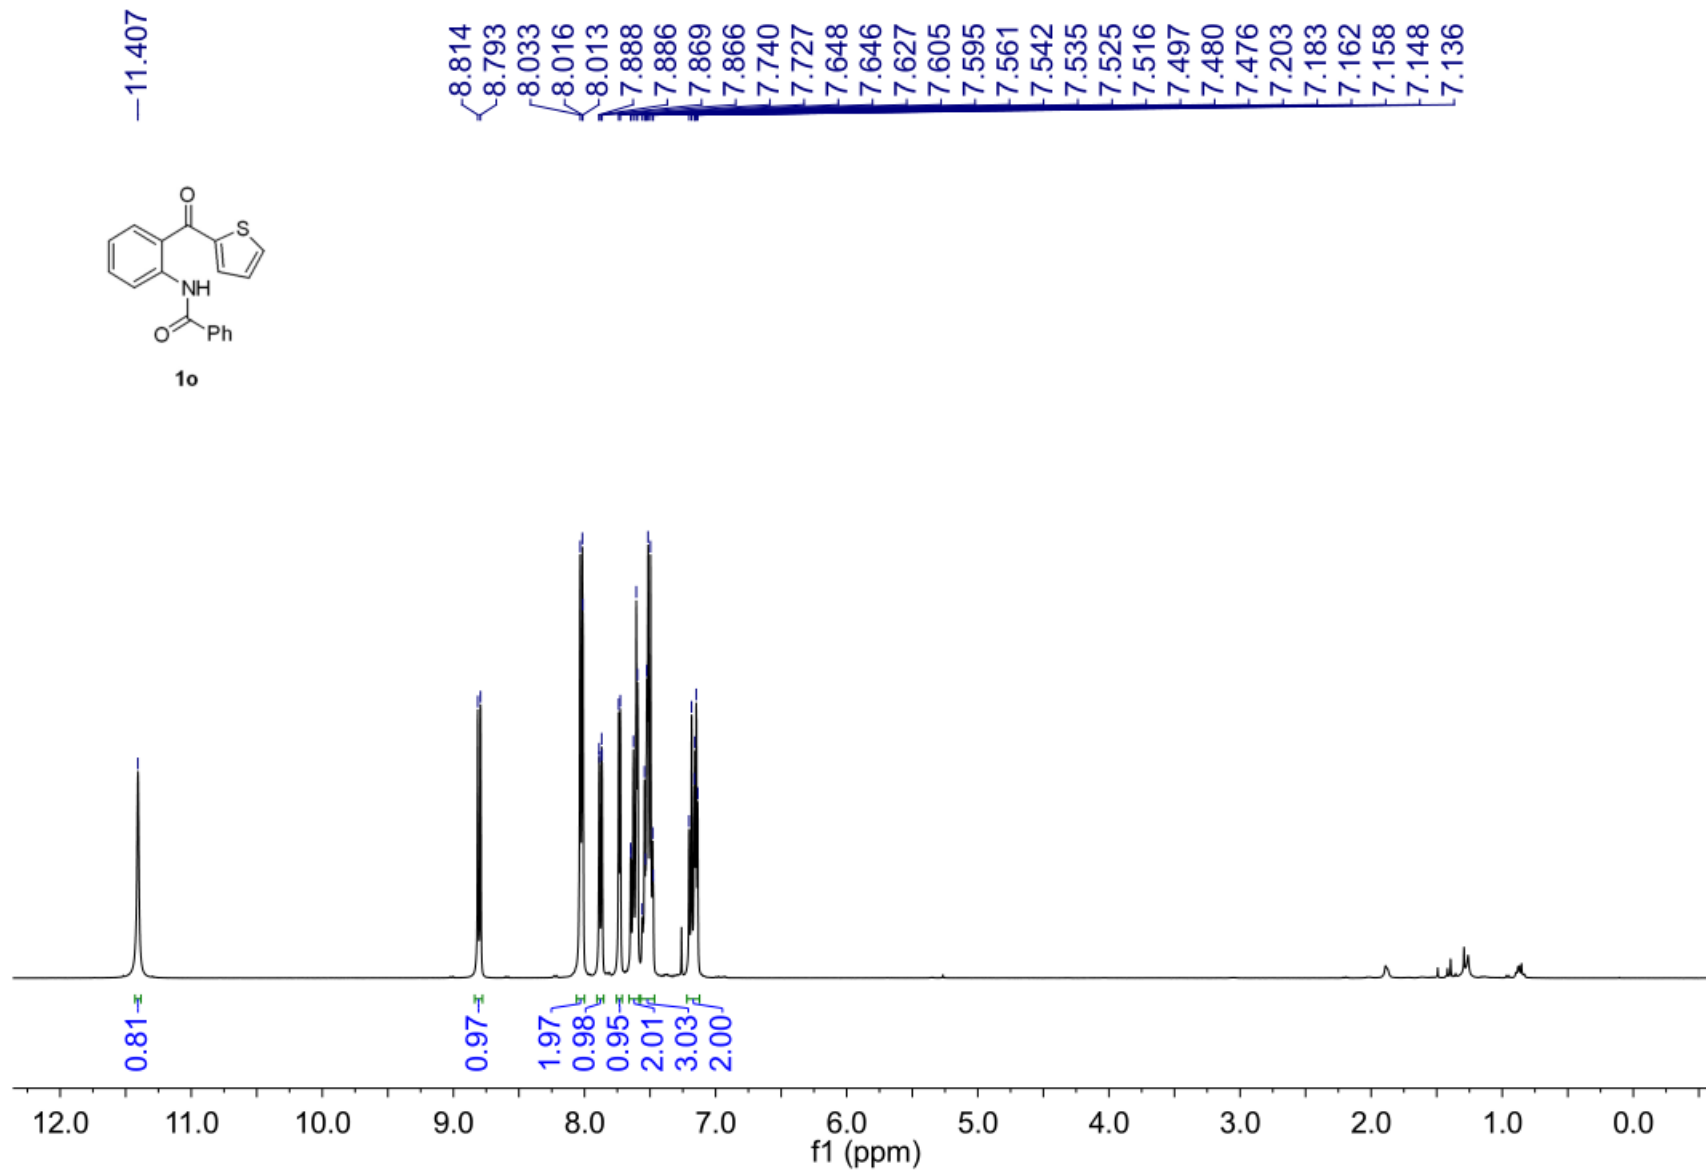

190.202

165.459

143.793

139.804

135.556

134.743

134.376

133.940

132.043

131.925

128.711

127.961

127.234

124.101

122.406

121.664

77.318

77.000

76.682

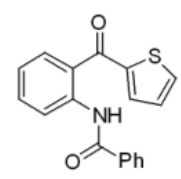

1o

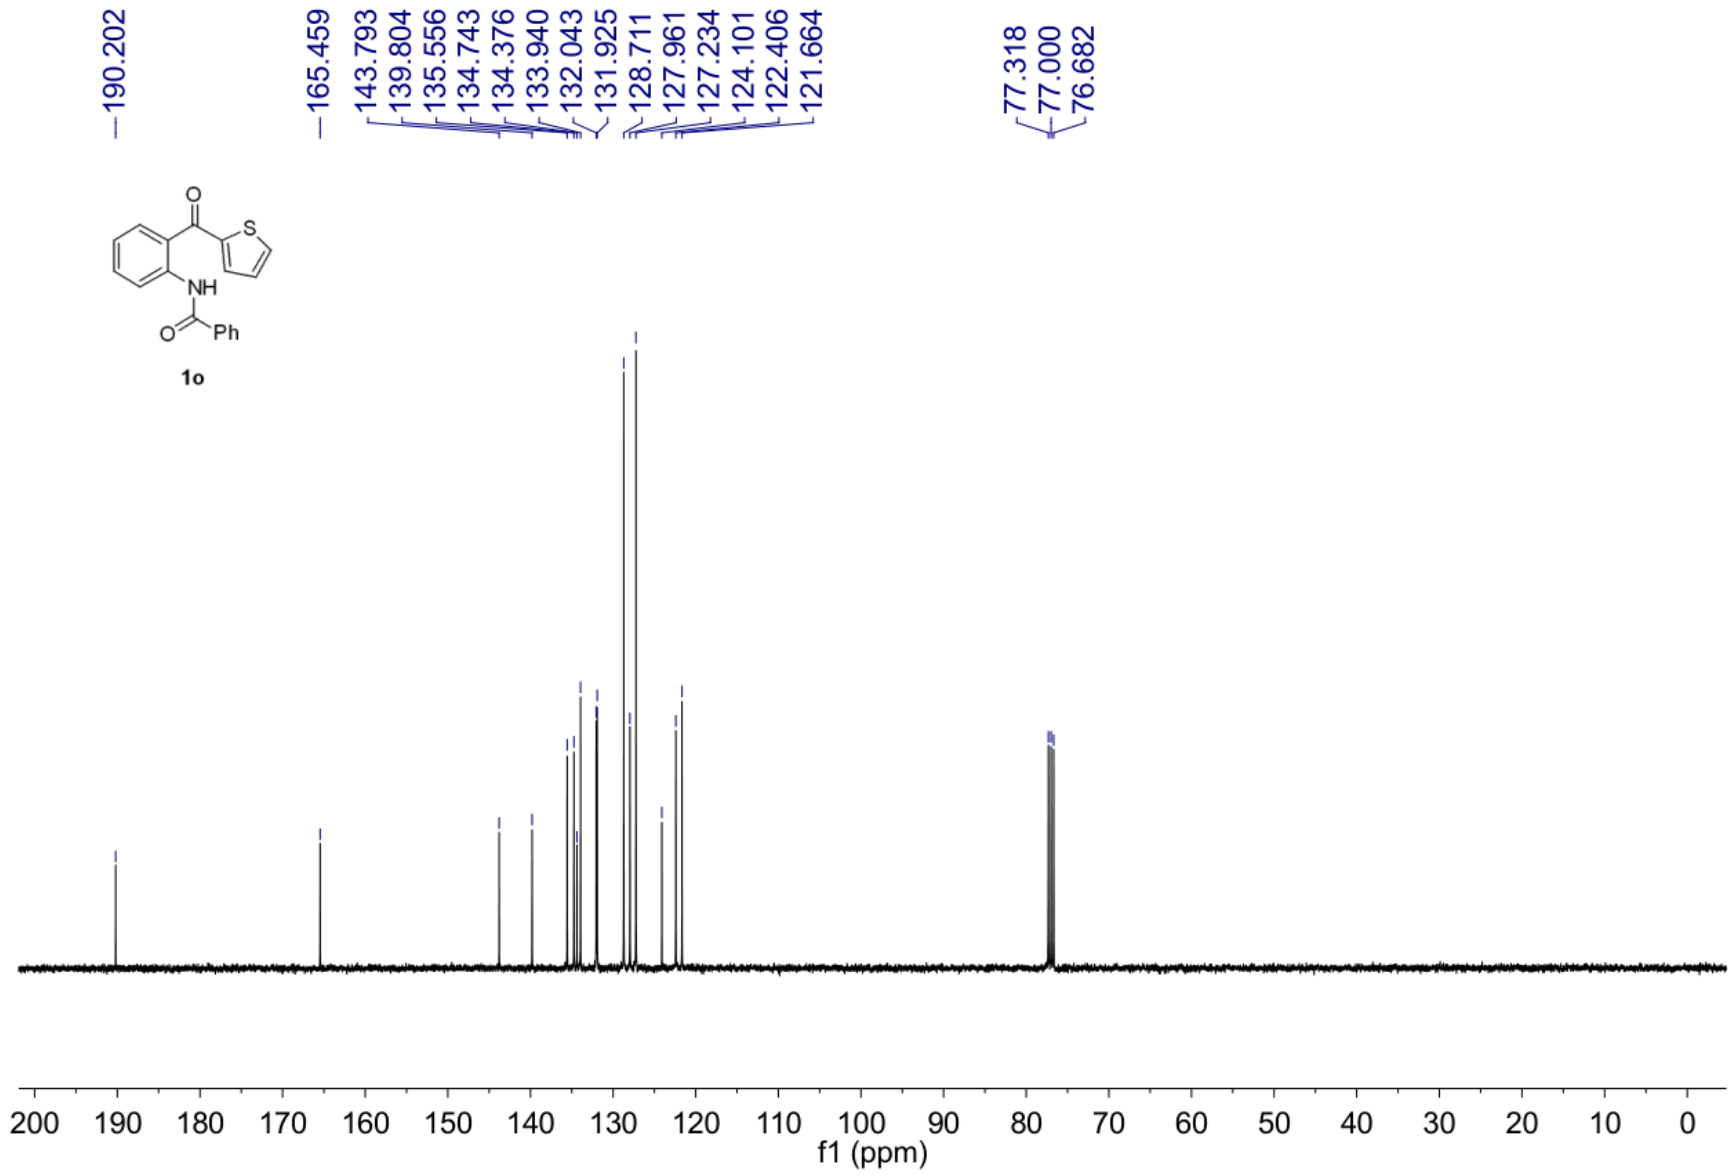

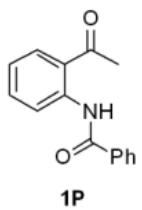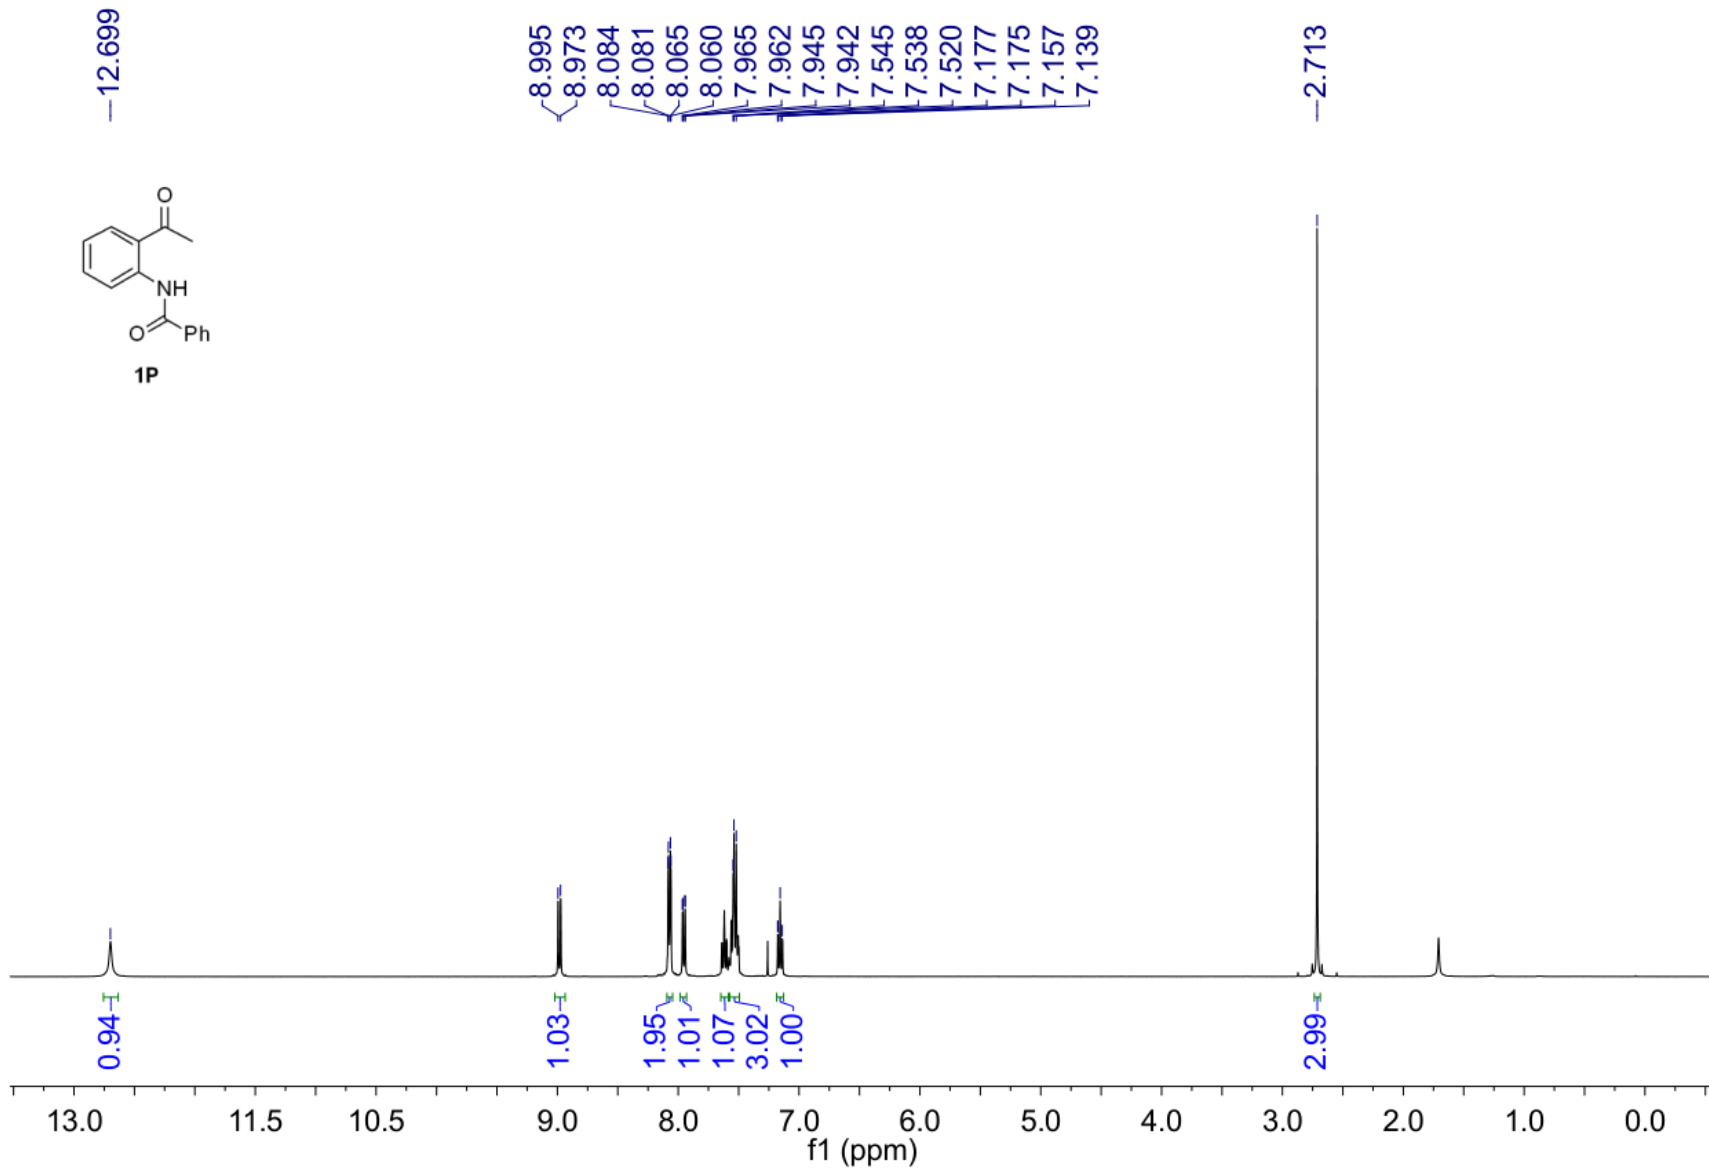



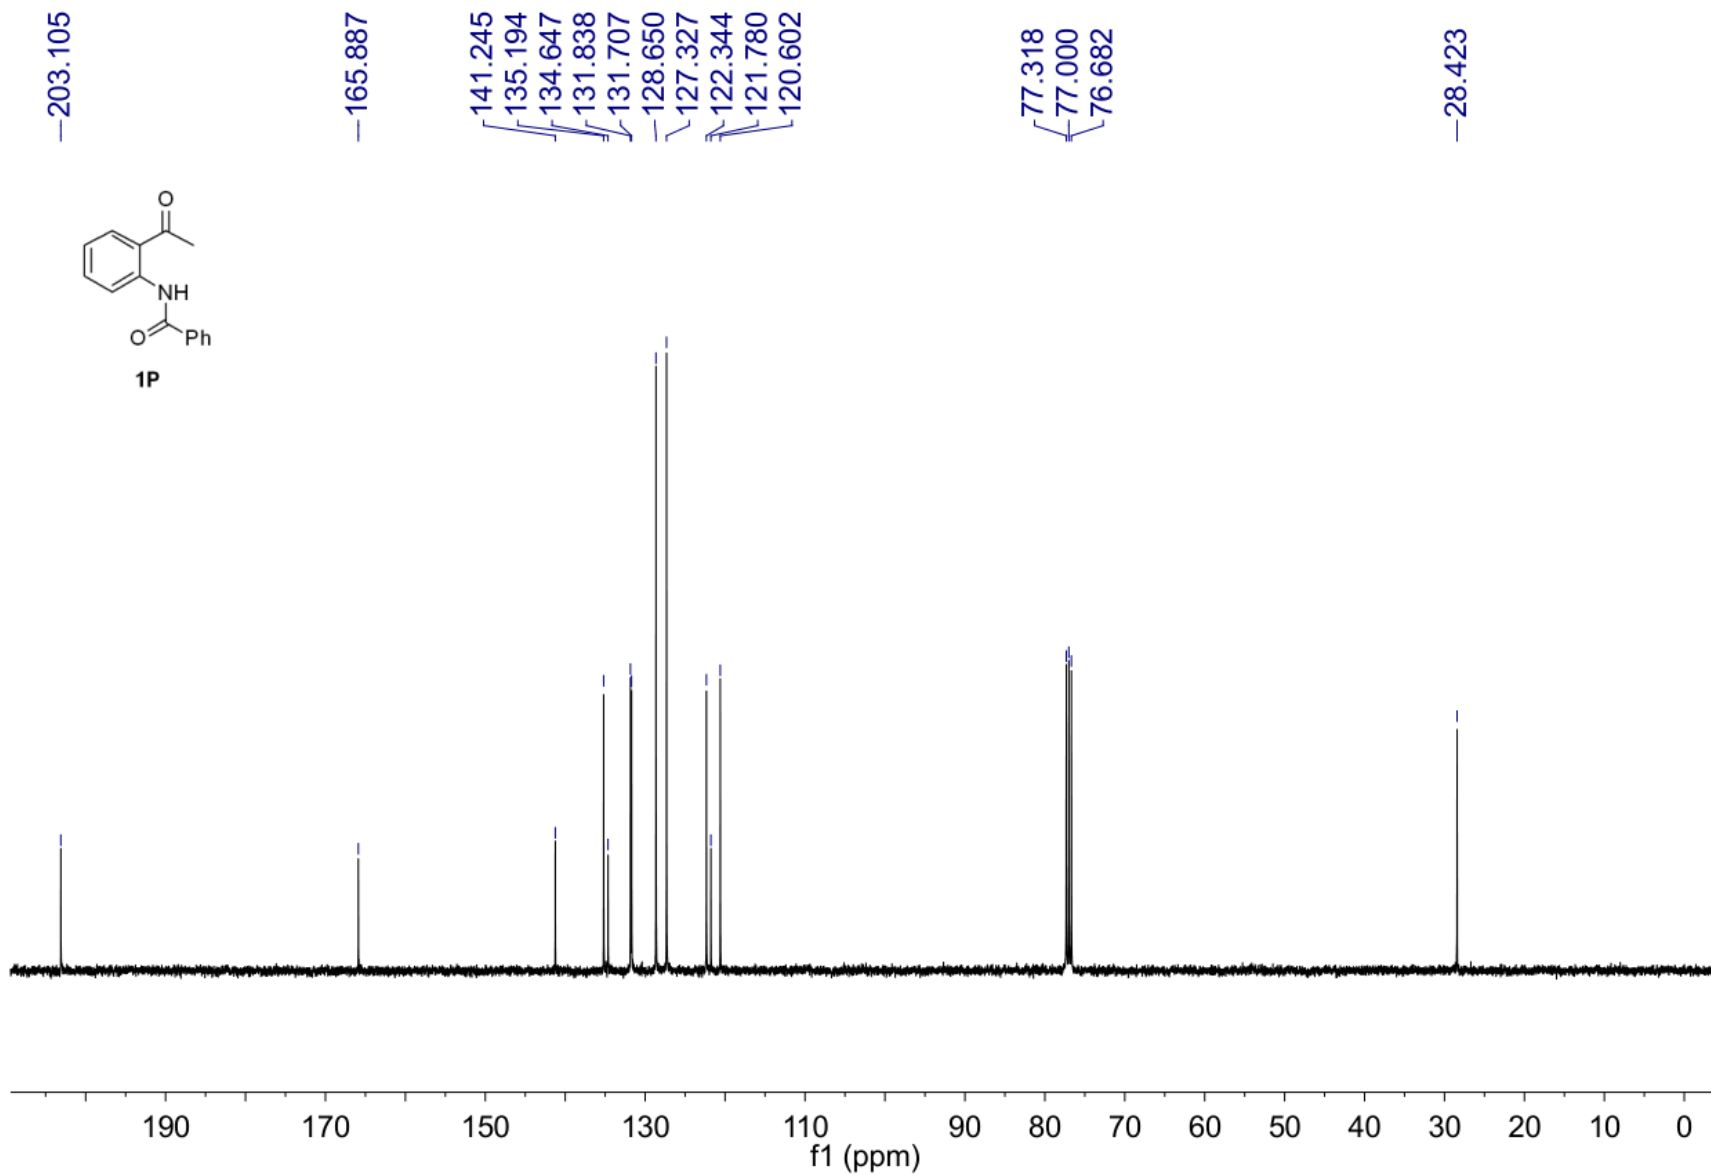

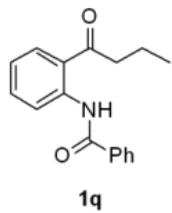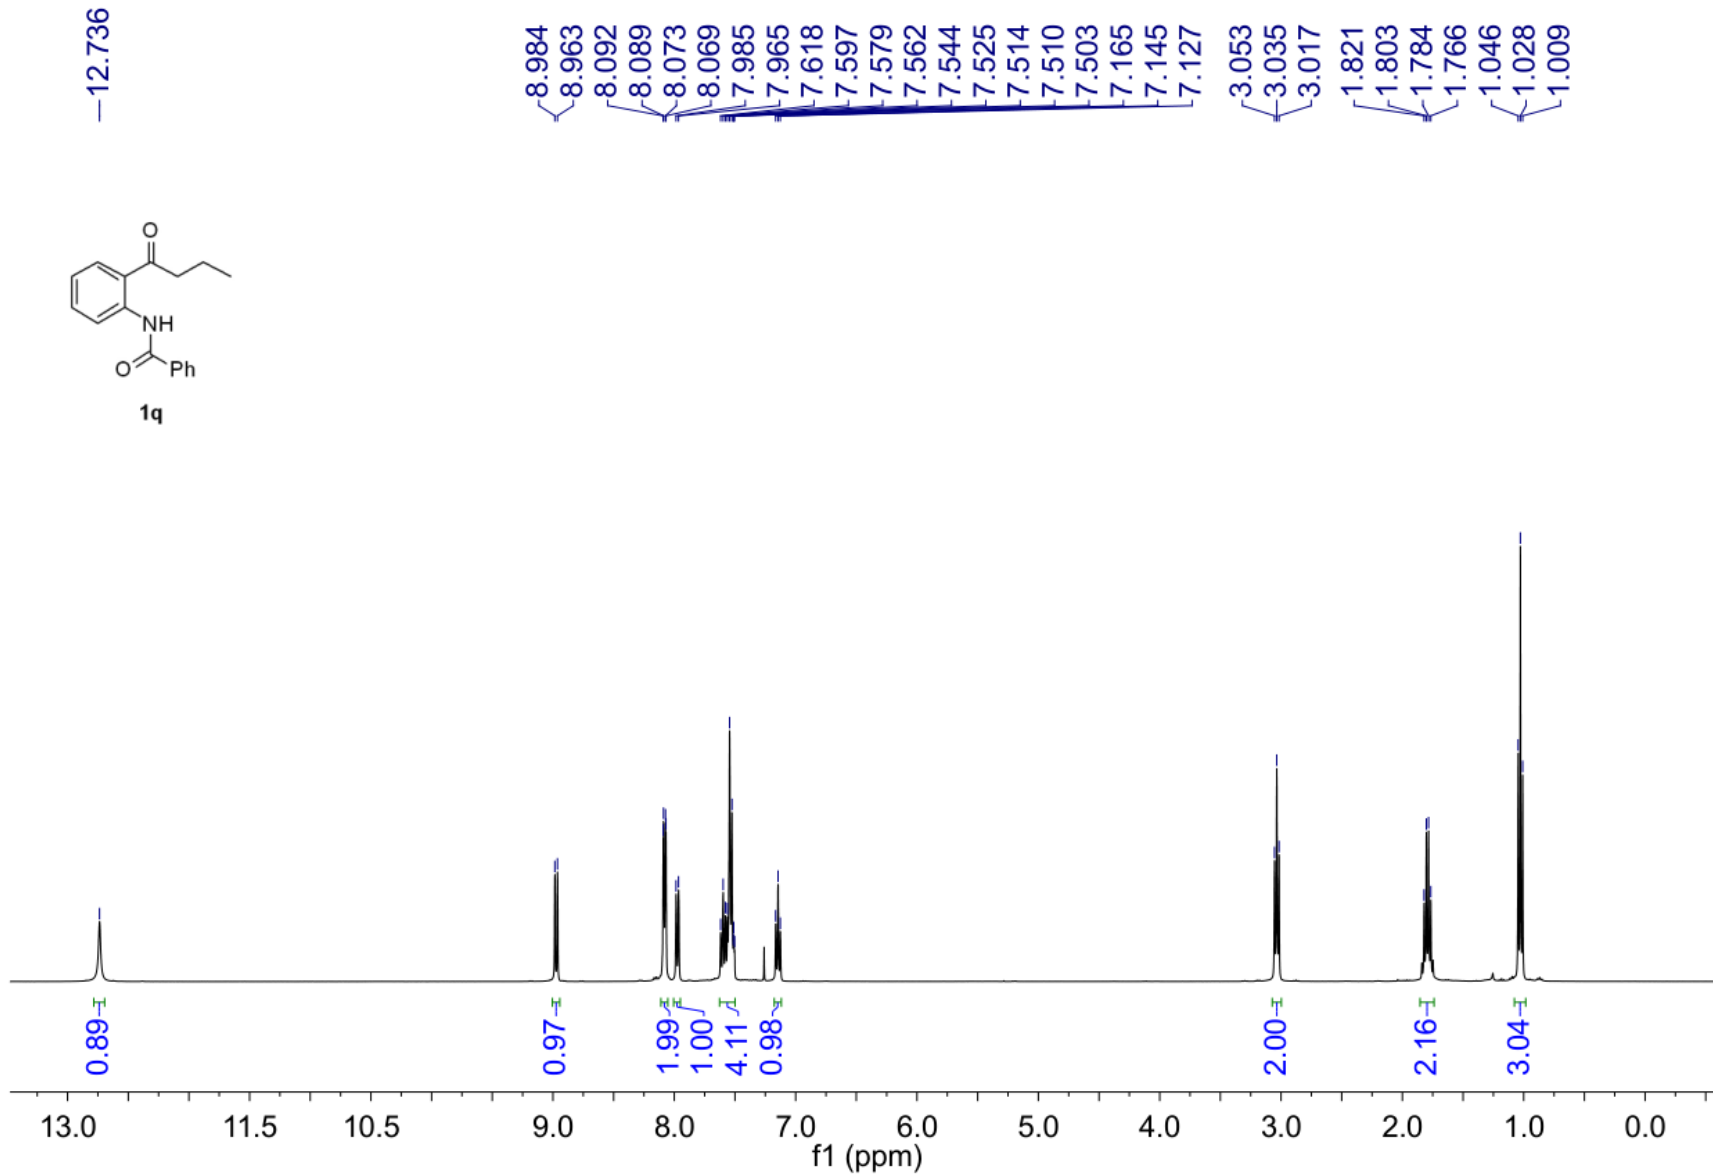

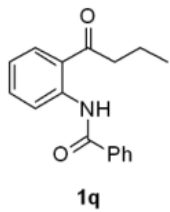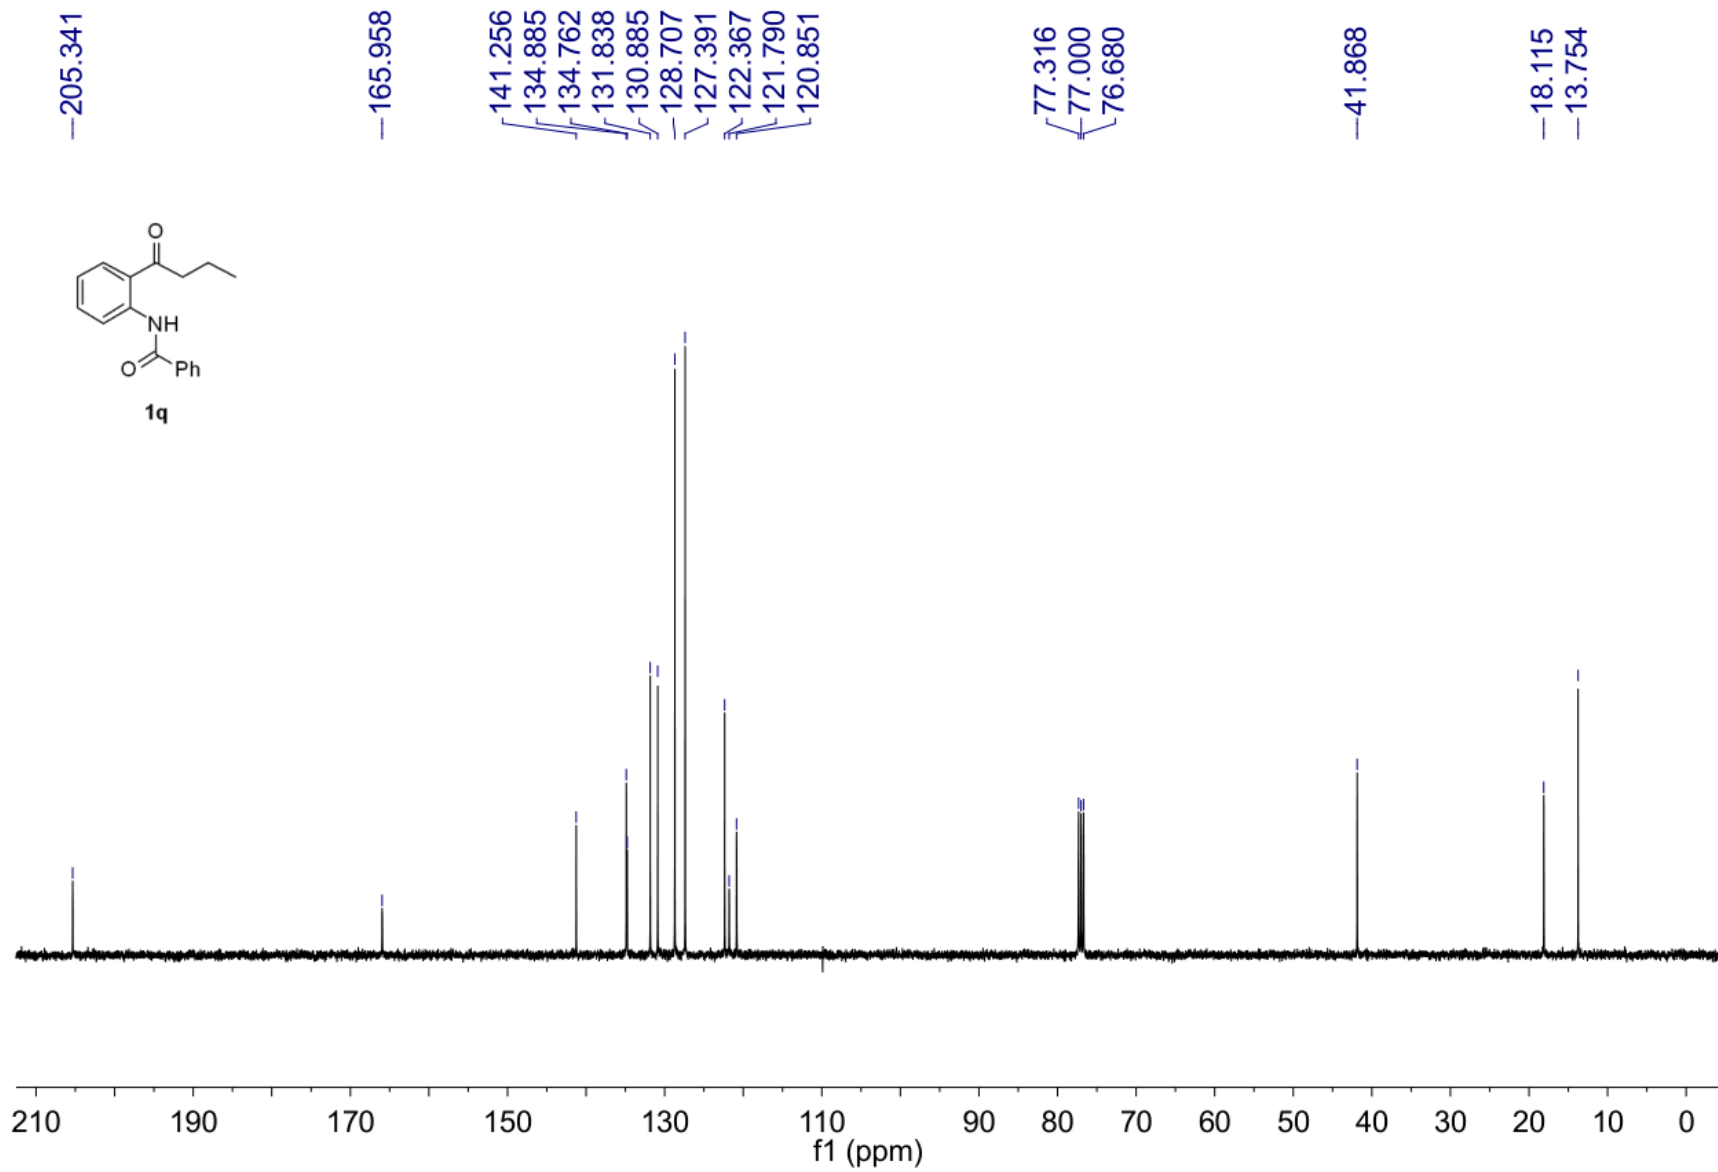

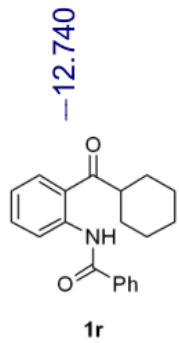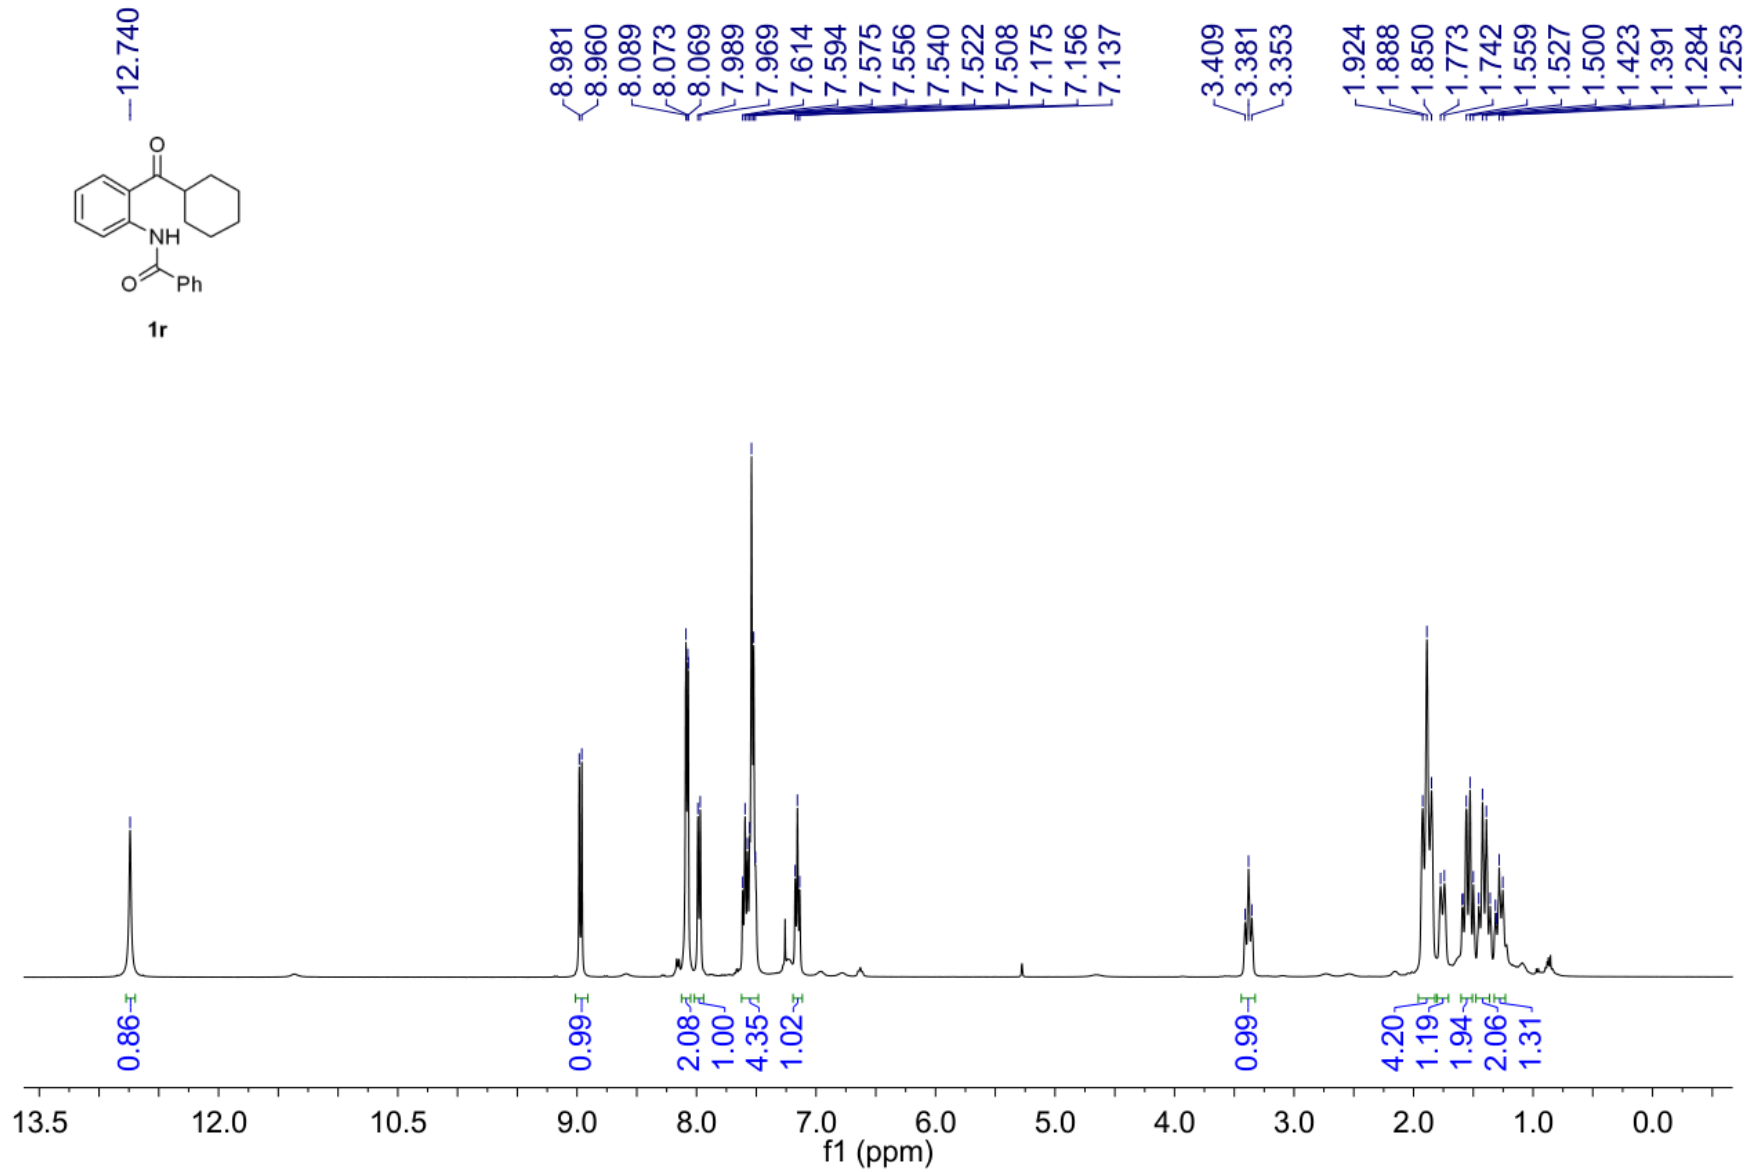

208.831

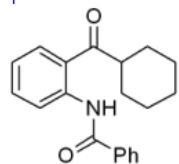

1r

166.007

141.683  
134.850  
134.789  
131.841  
130.613  
128.733  
127.424  
122.408  
121.197  
121.076

77.319  
77.000  
76.684

46.648

29.827  
25.812  
25.764

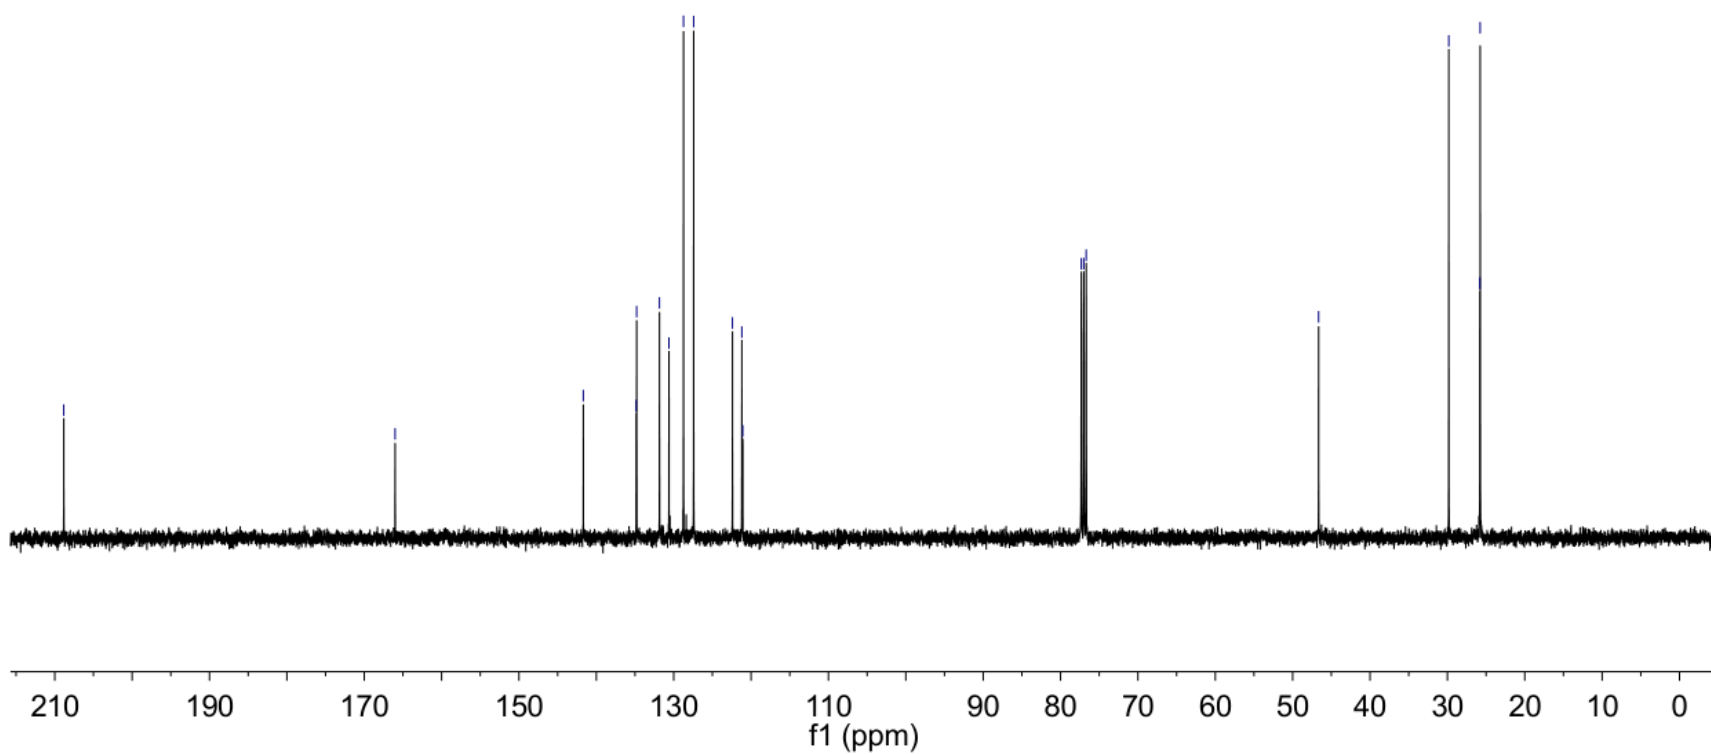

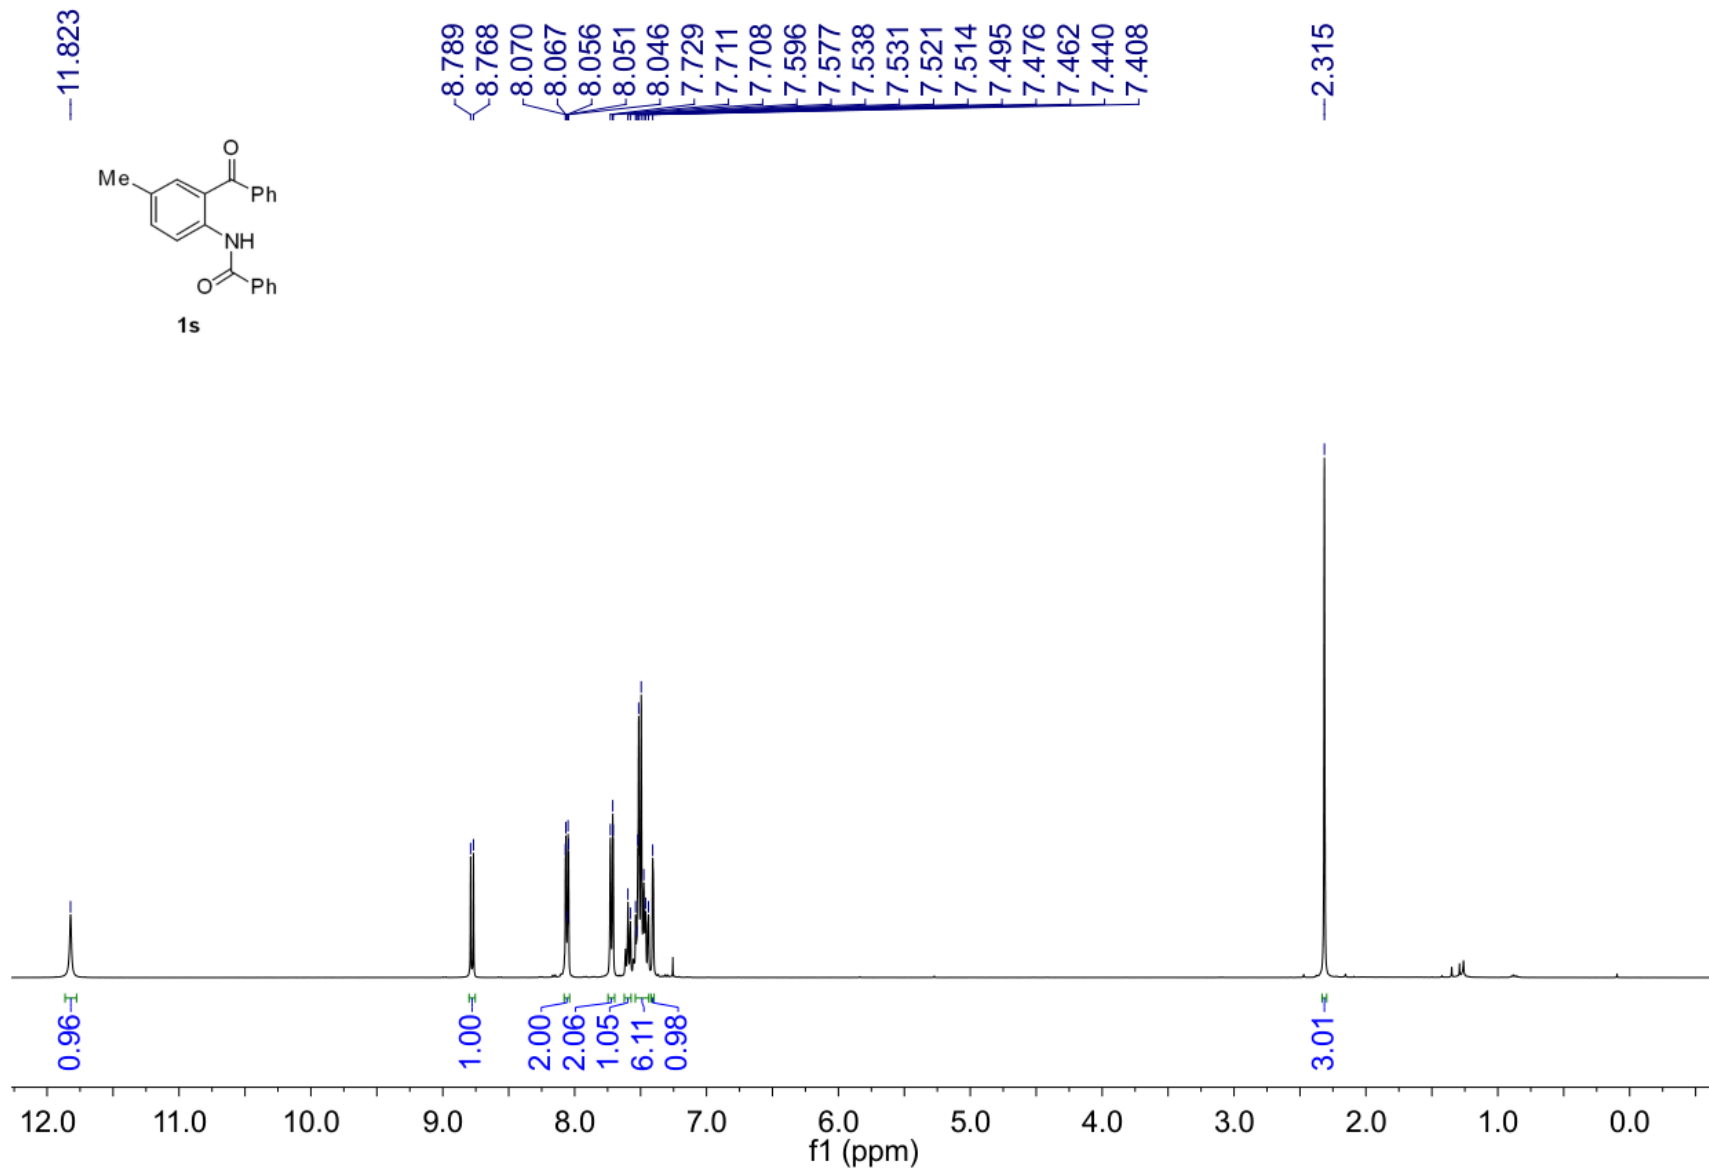

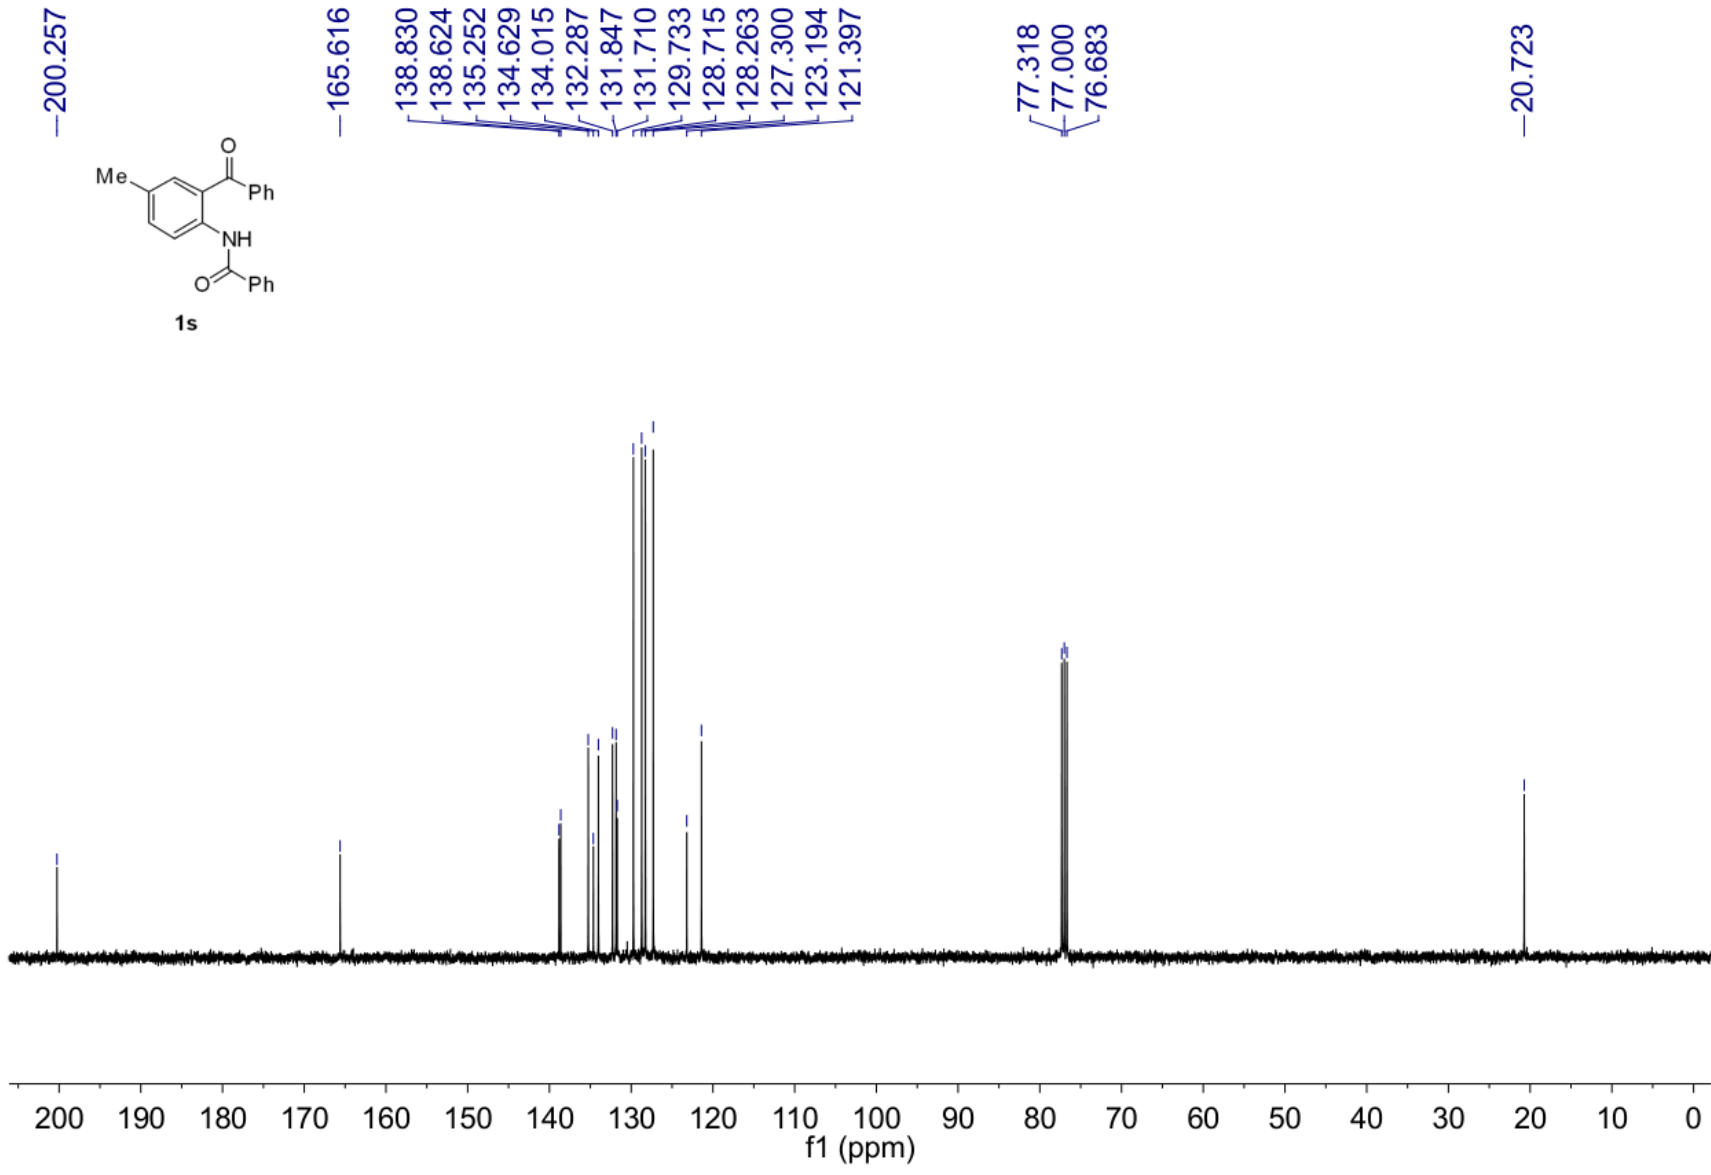

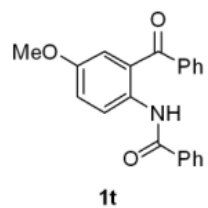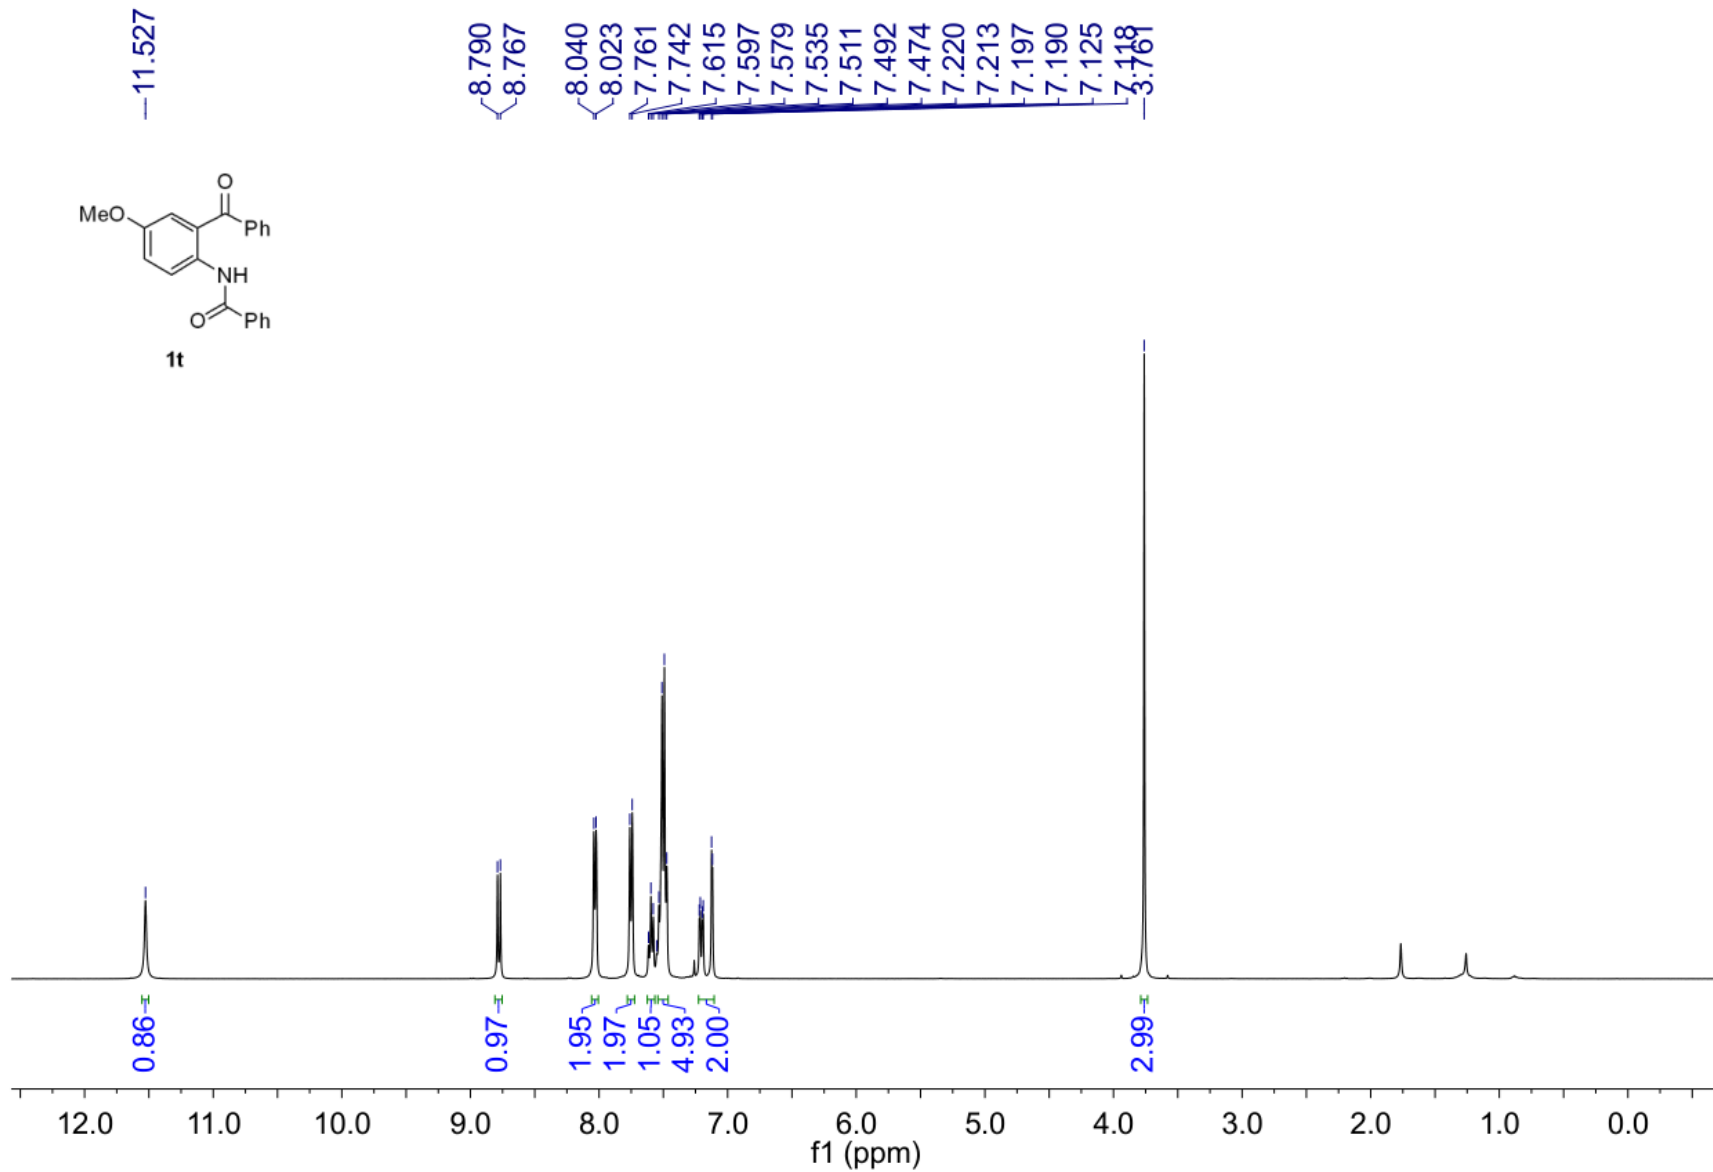



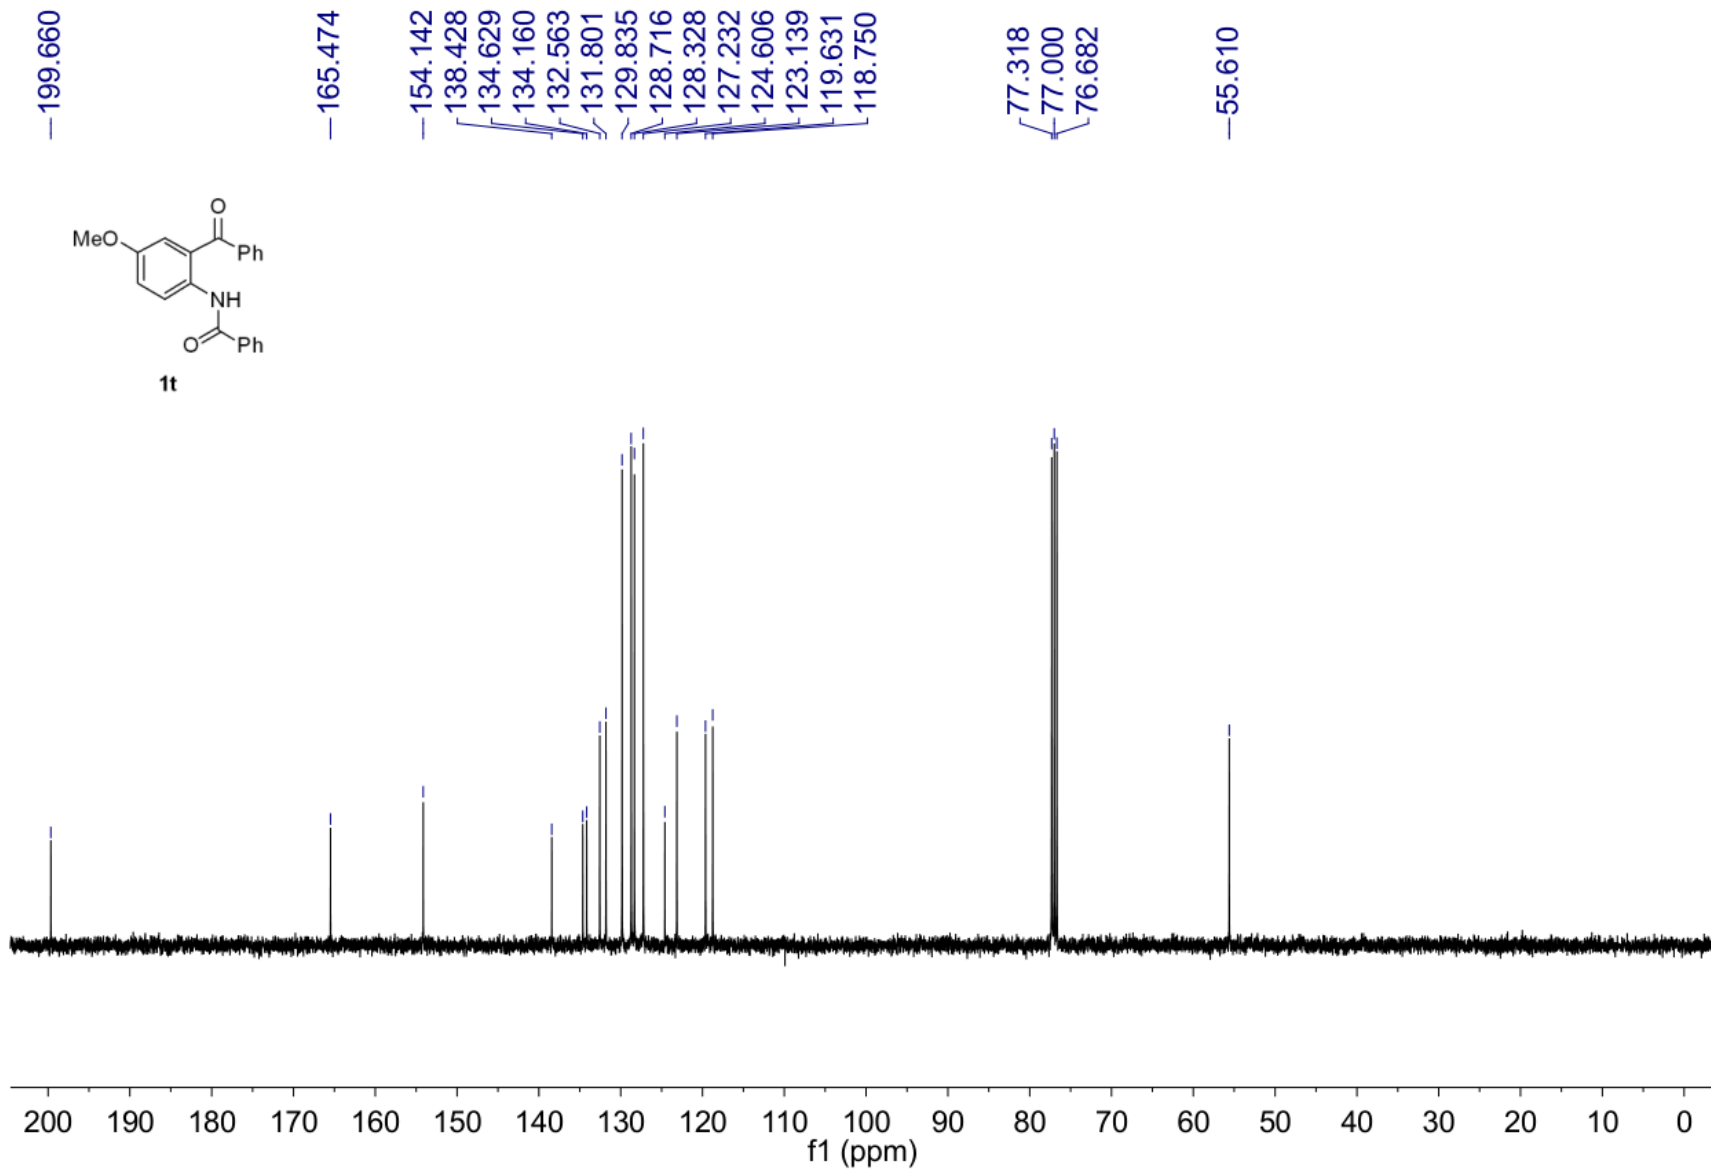

—12.155

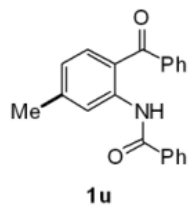

8.787  
8.785

8.102  
8.099  
8.083  
8.078  
7.705  
7.702  
7.684  
7.681  
7.581  
7.562  
7.541  
7.537  
7.532  
7.531  
7.527  
7.515  
7.513  
7.503  
7.500  
7.487  
7.484

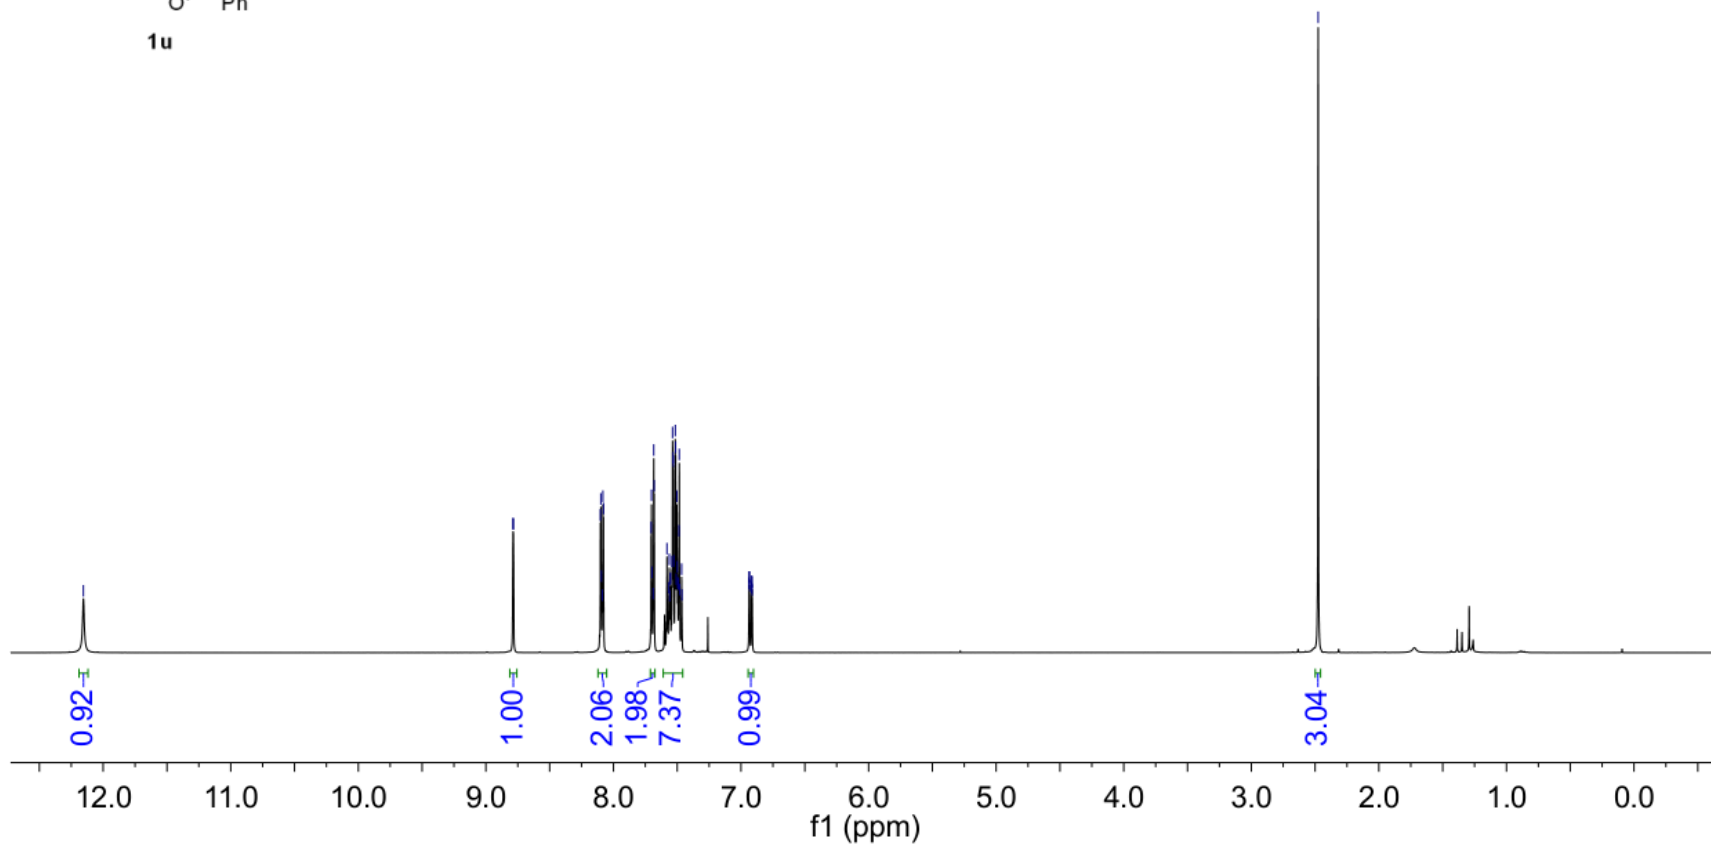

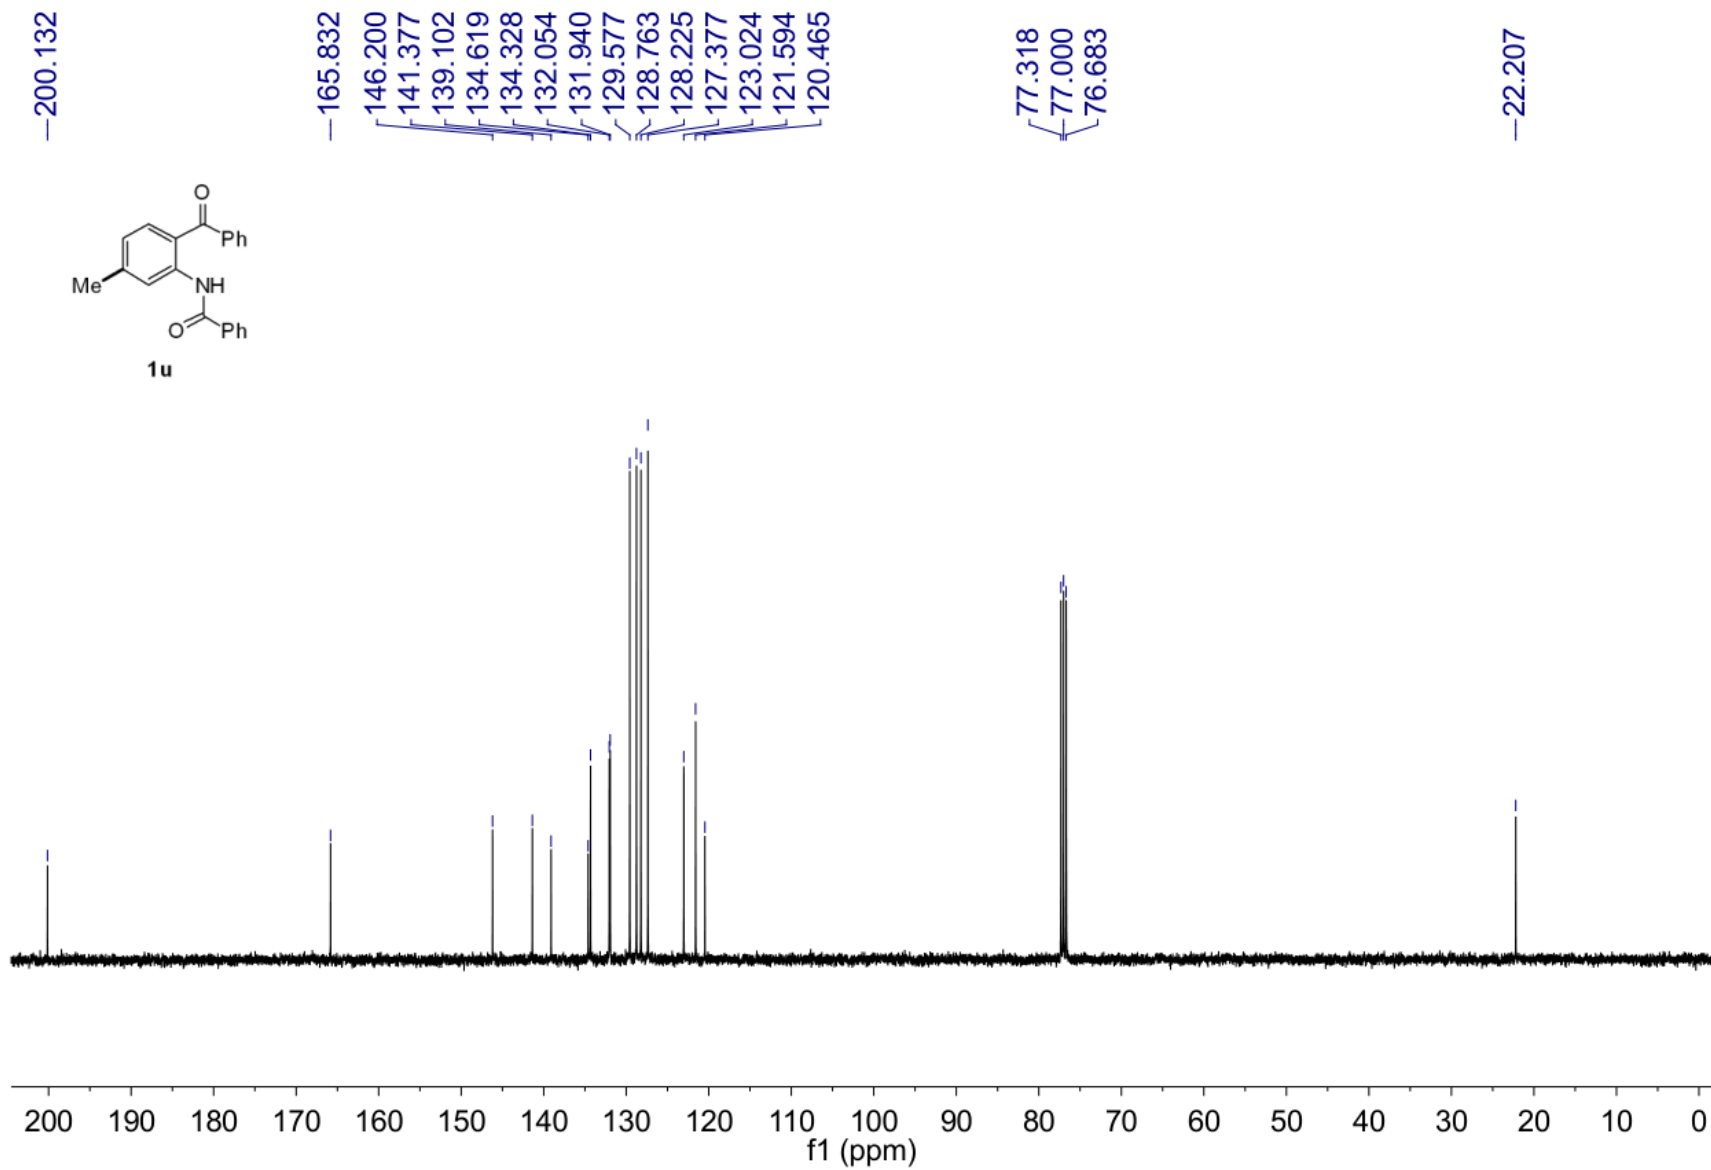

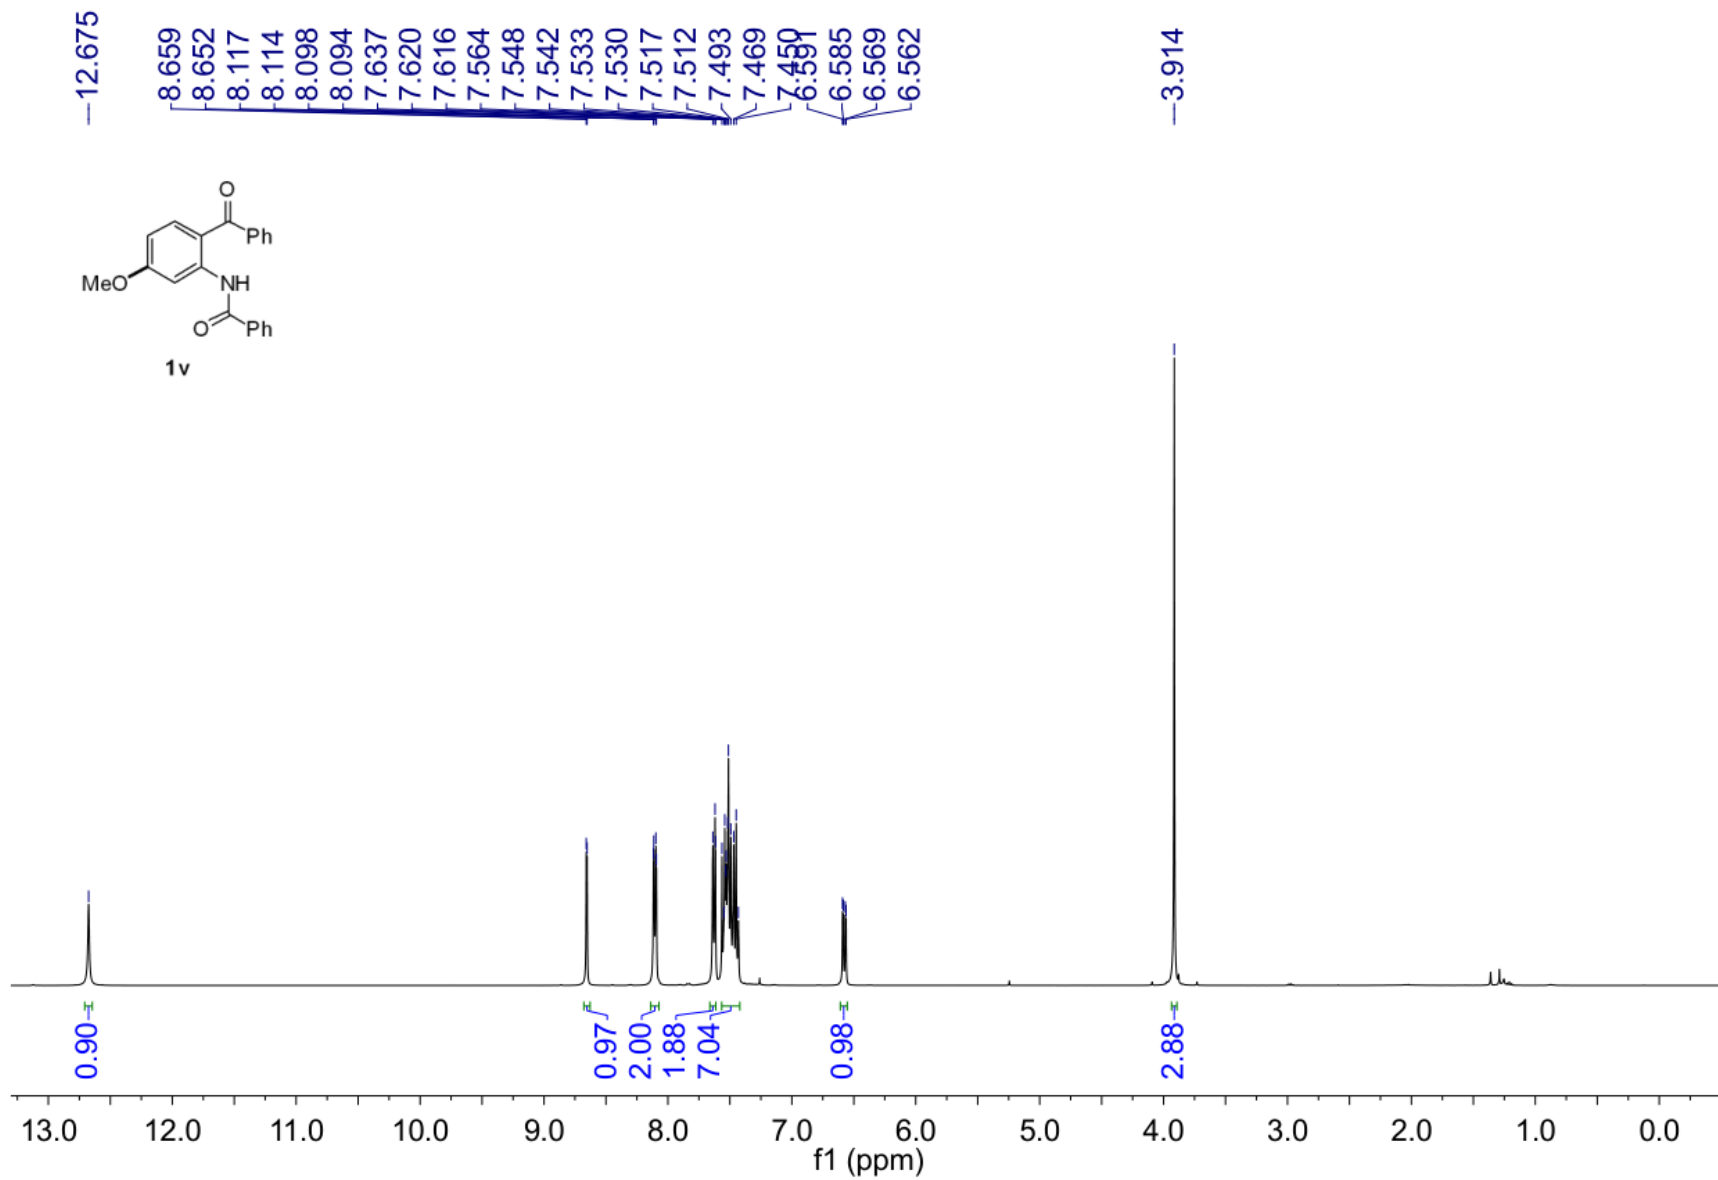

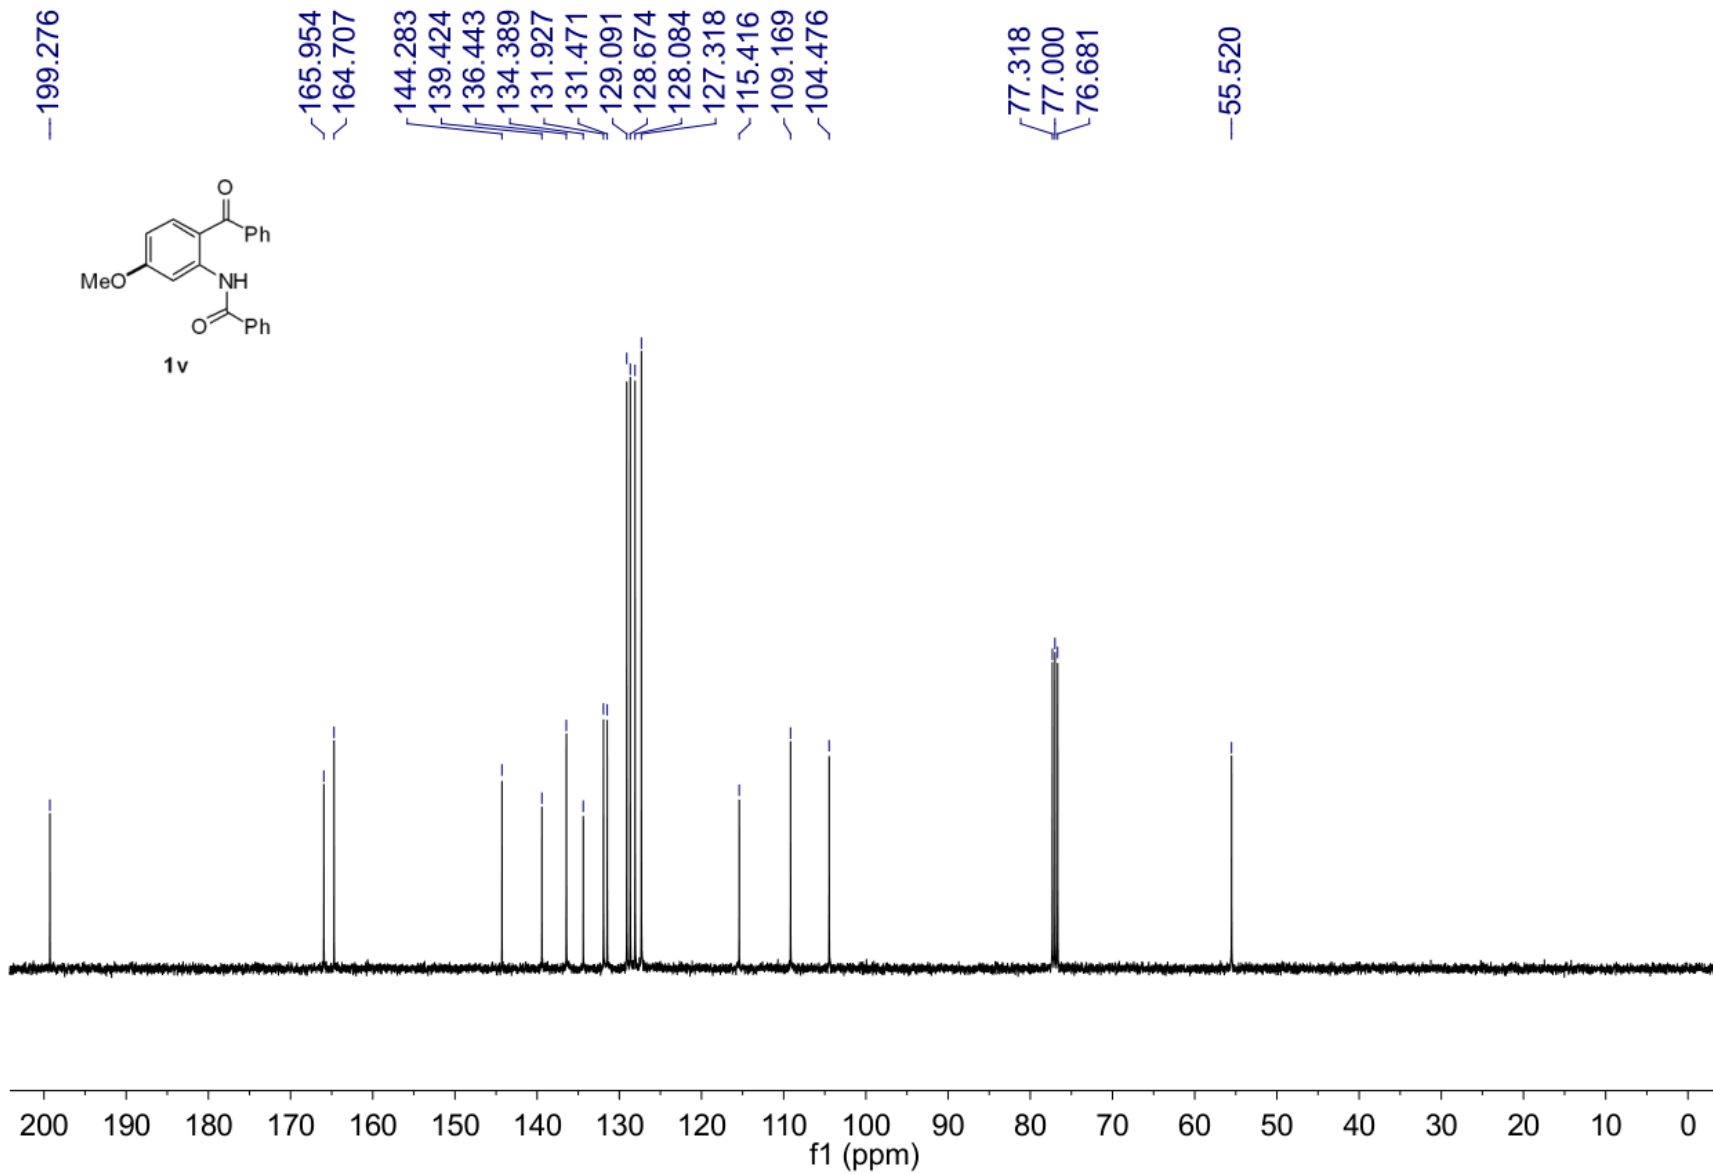

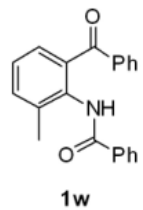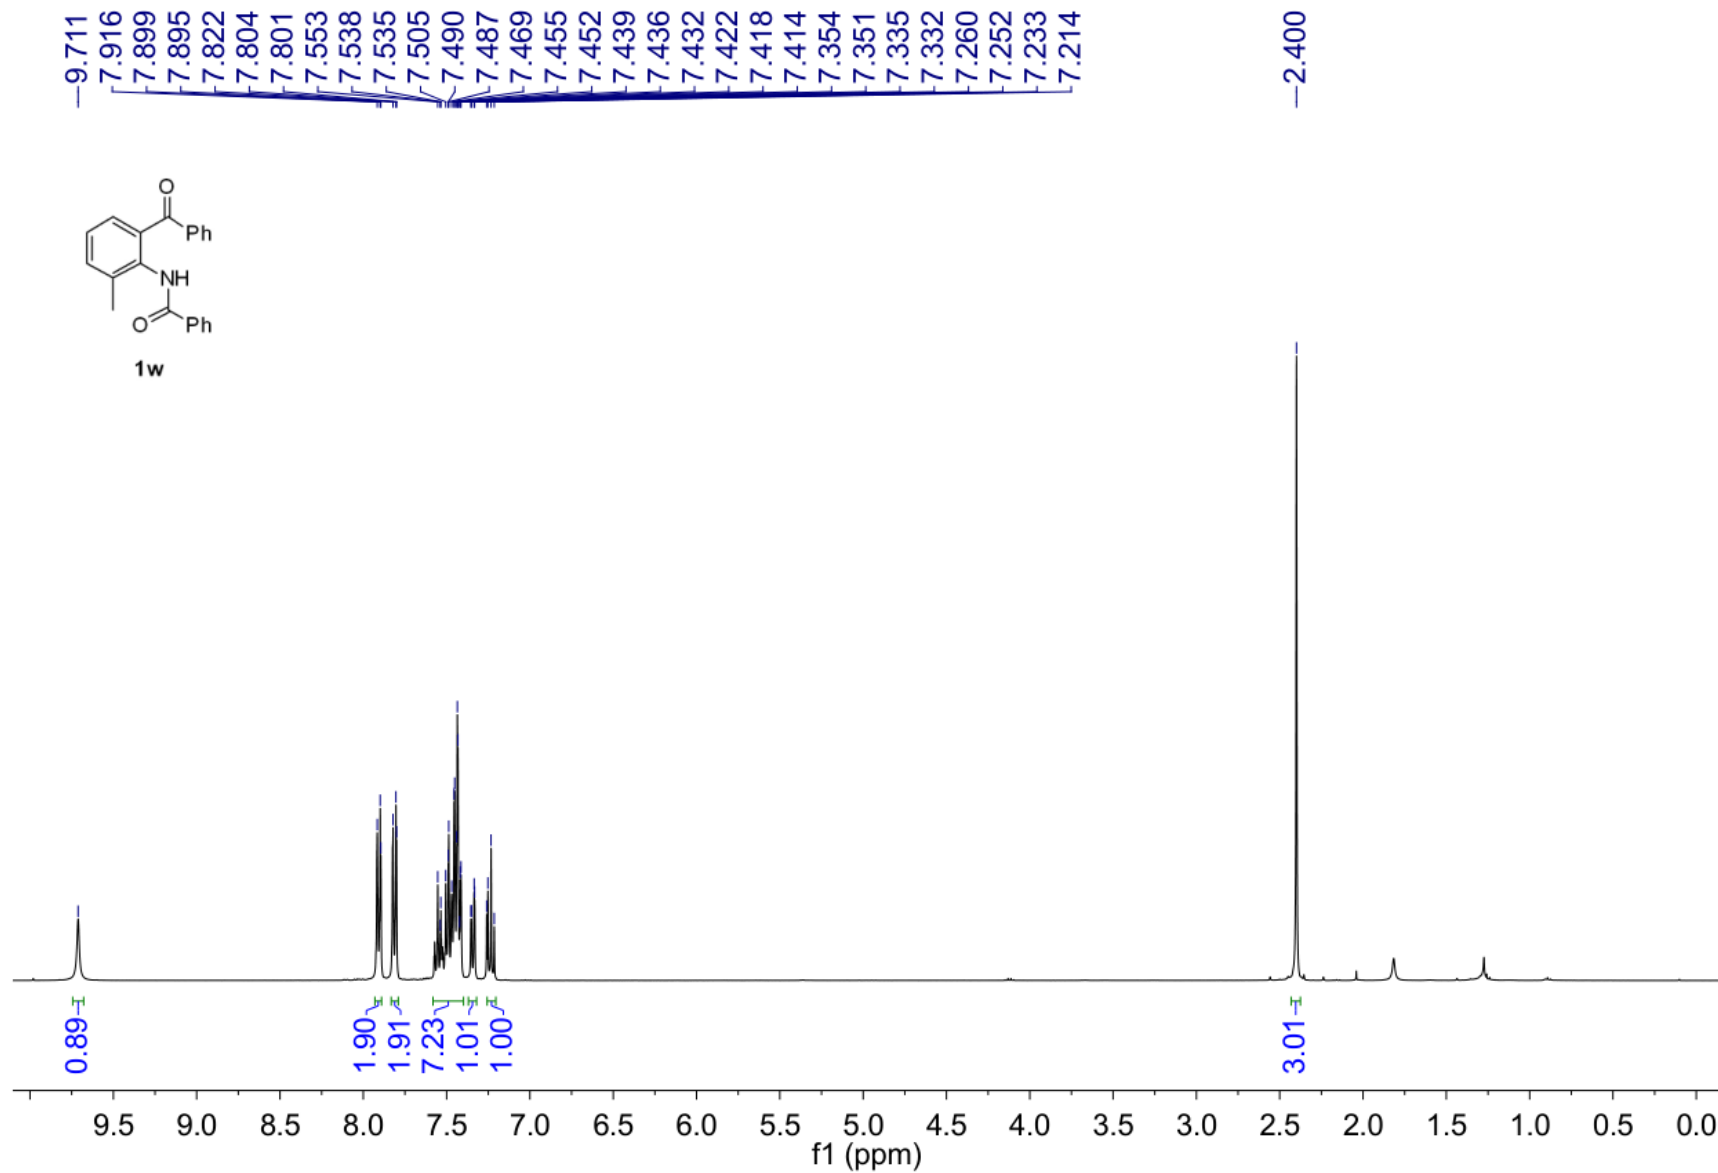

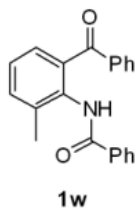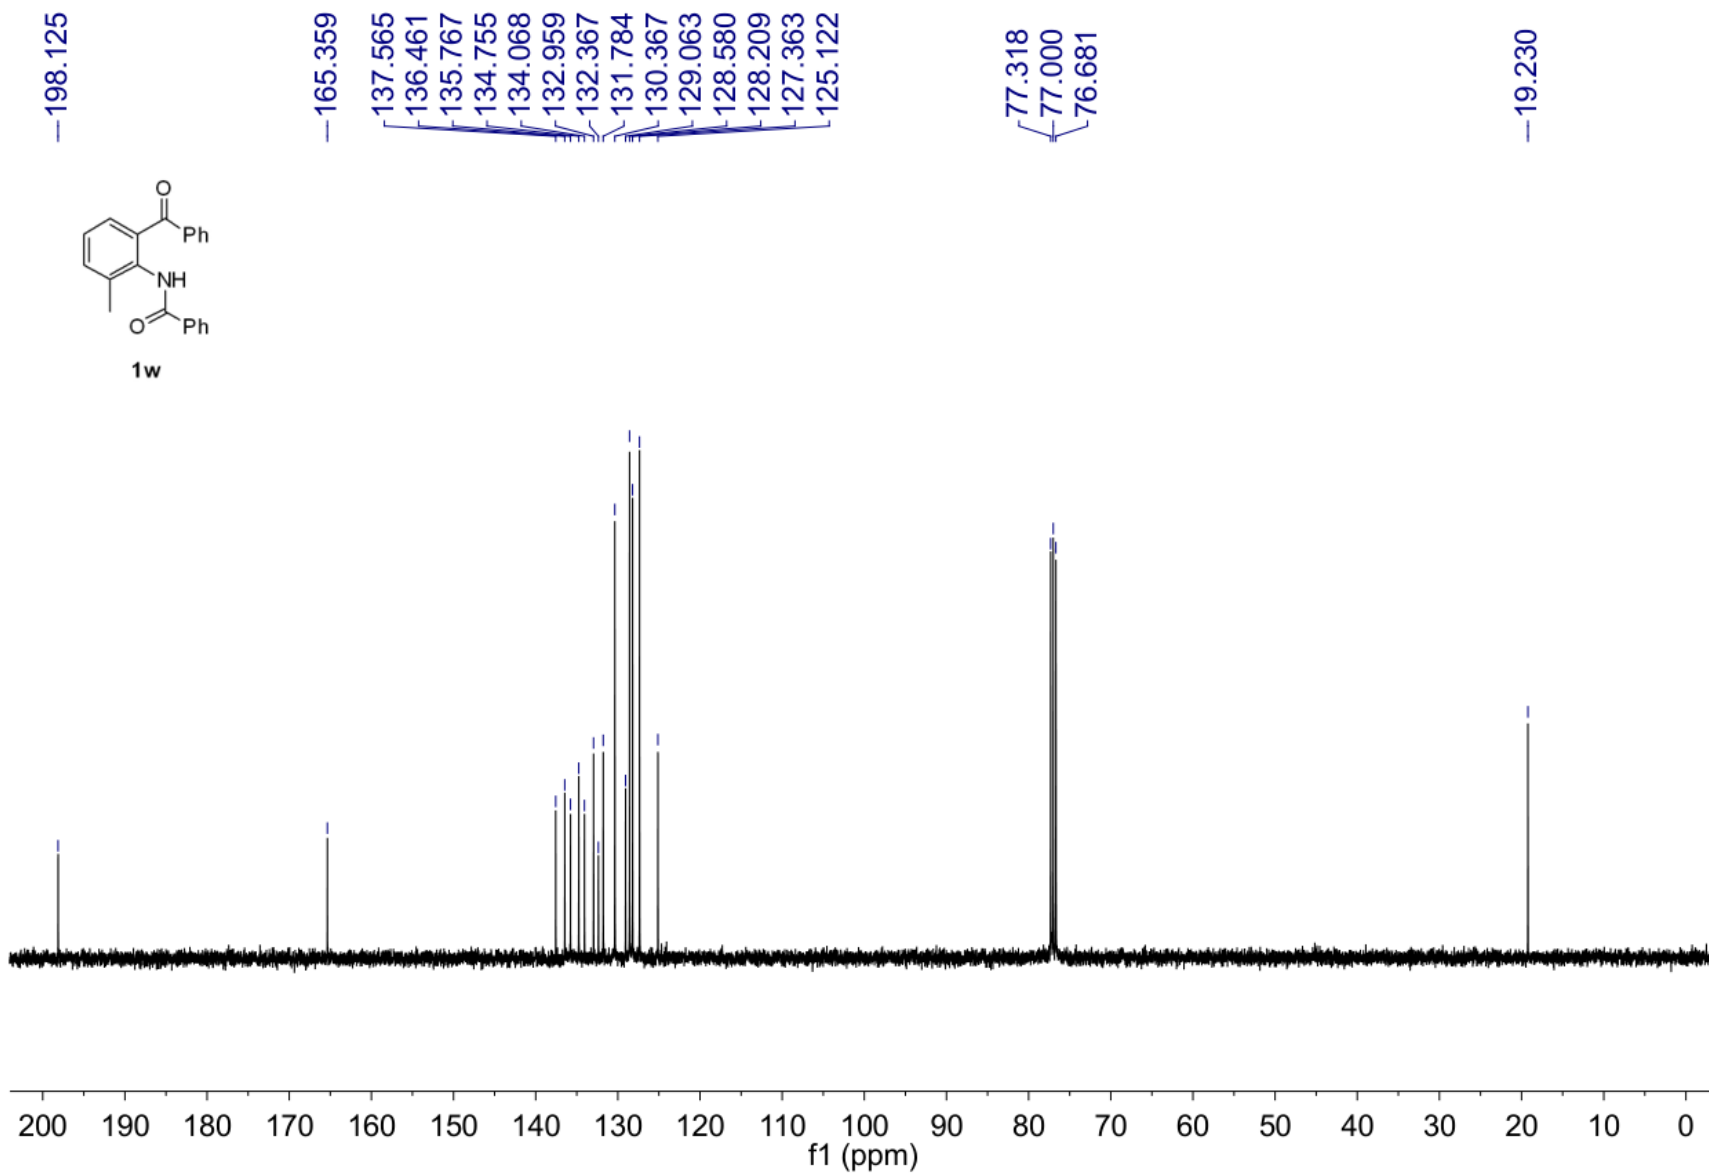

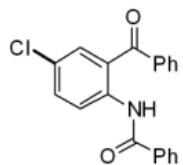

1x

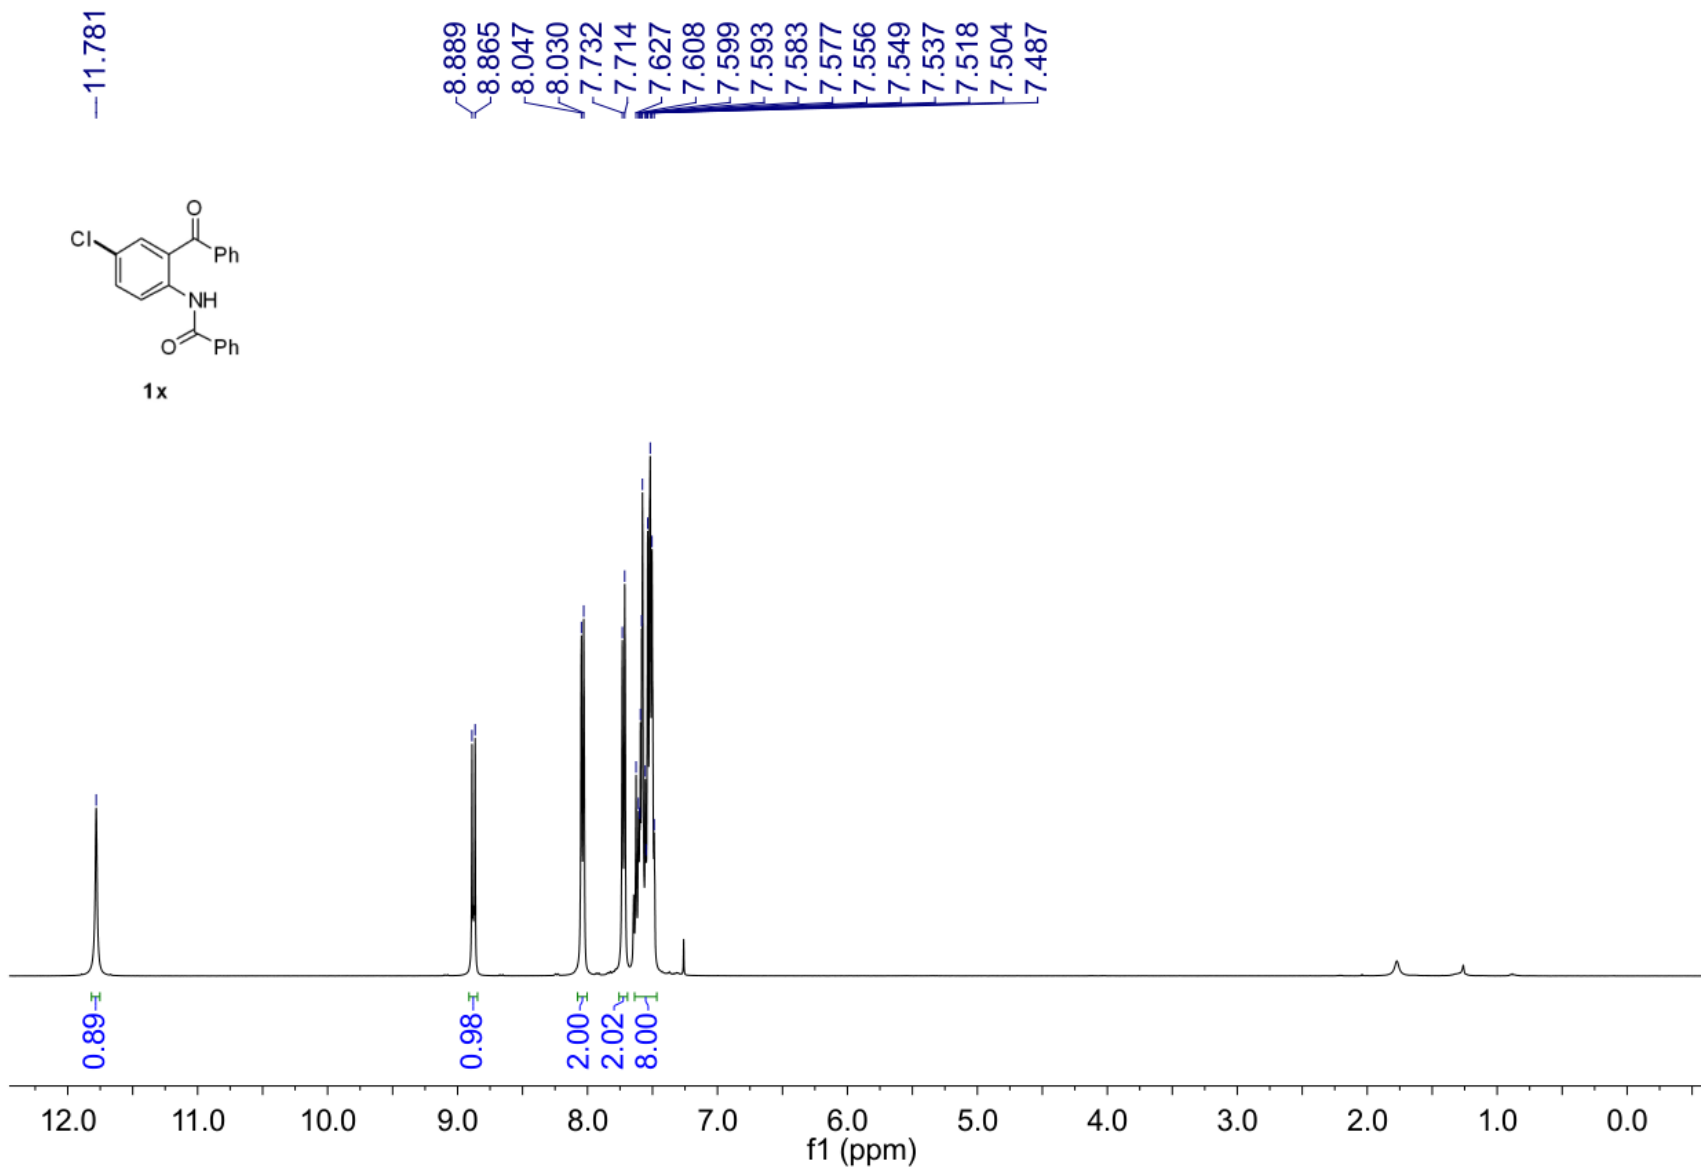



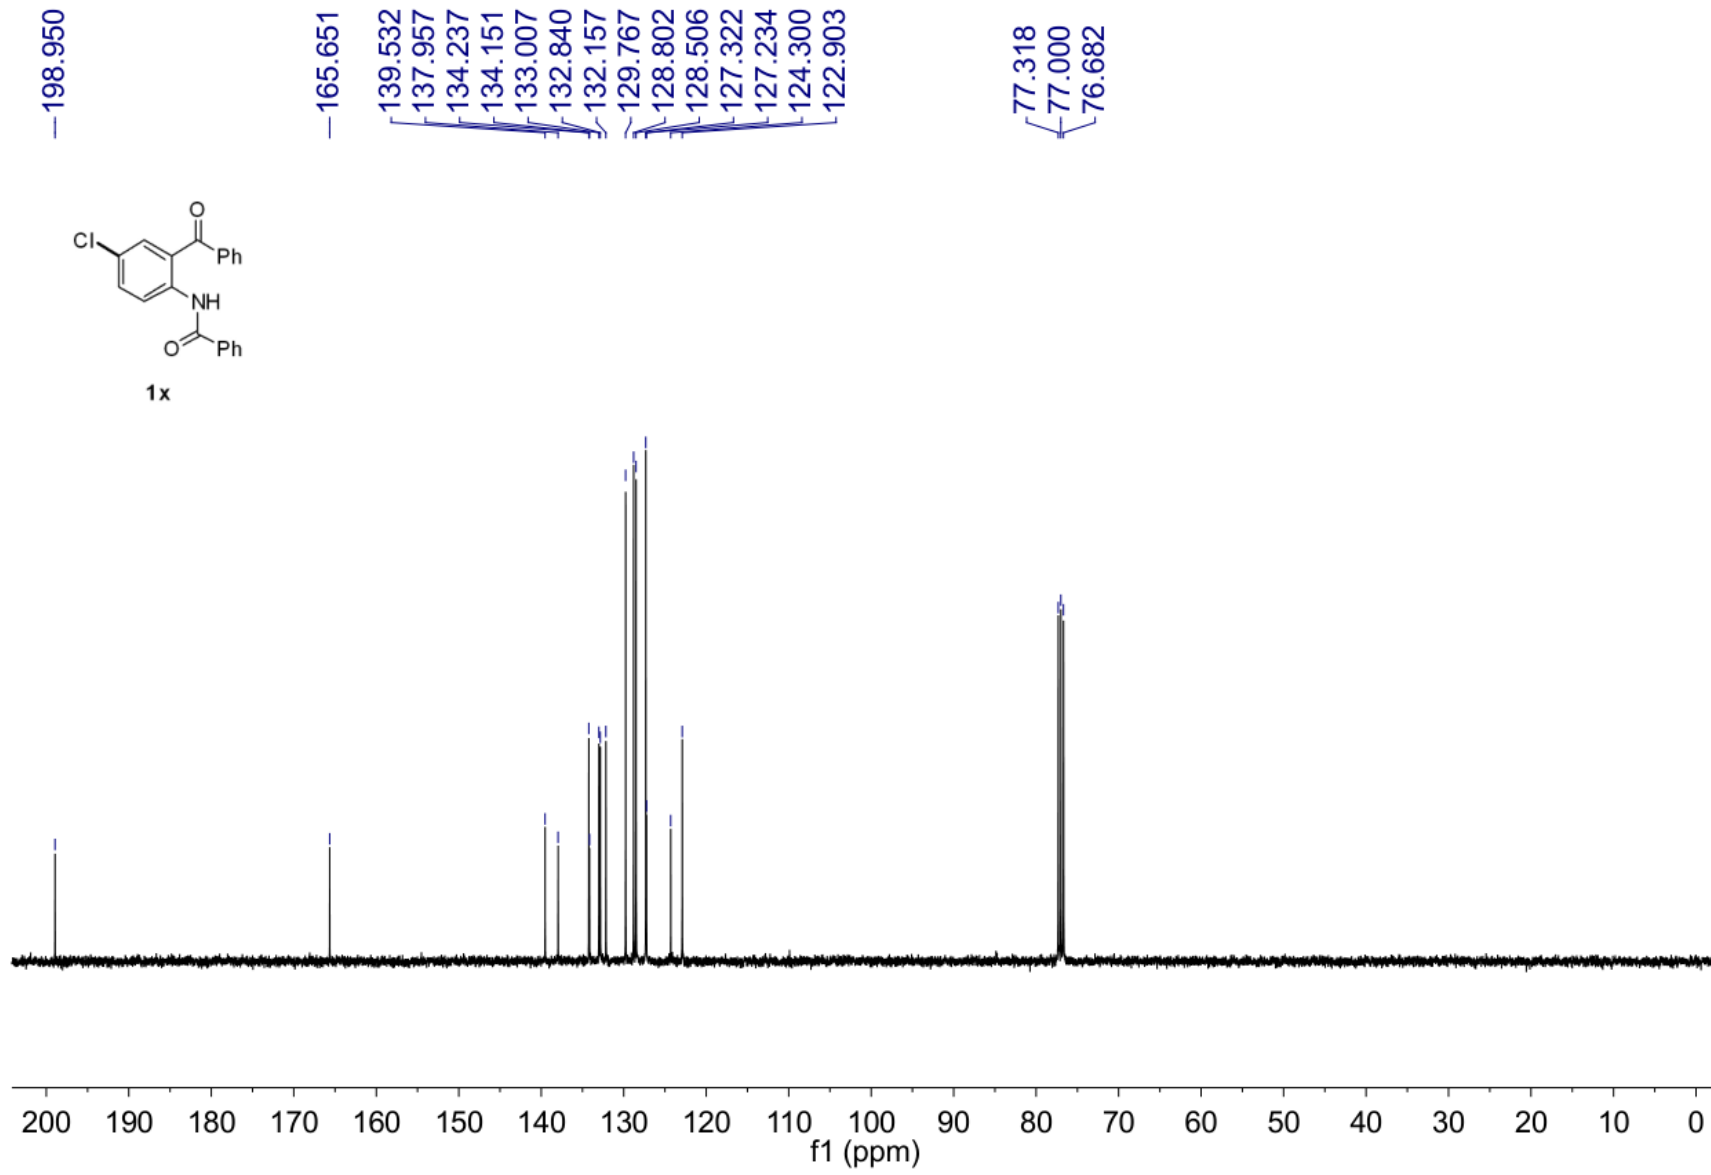

—11.783

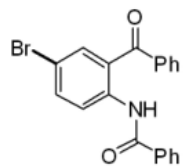

1y

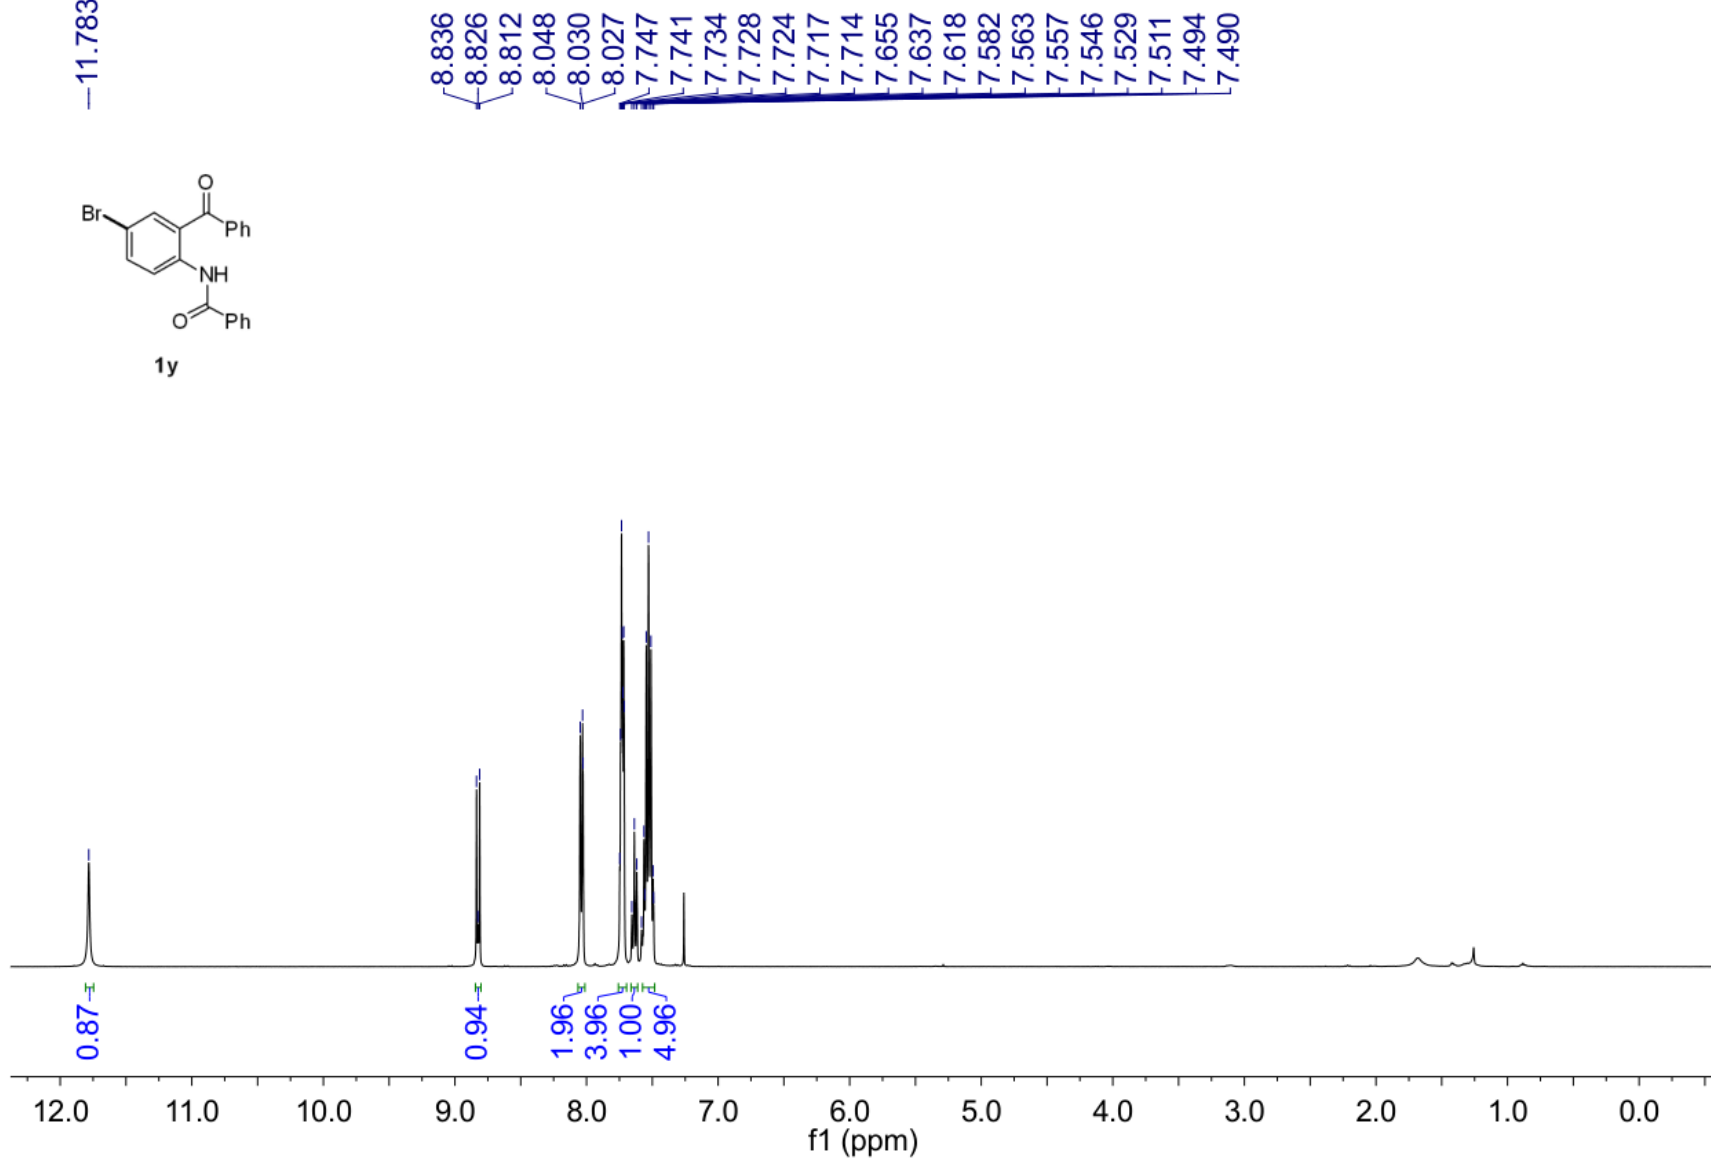

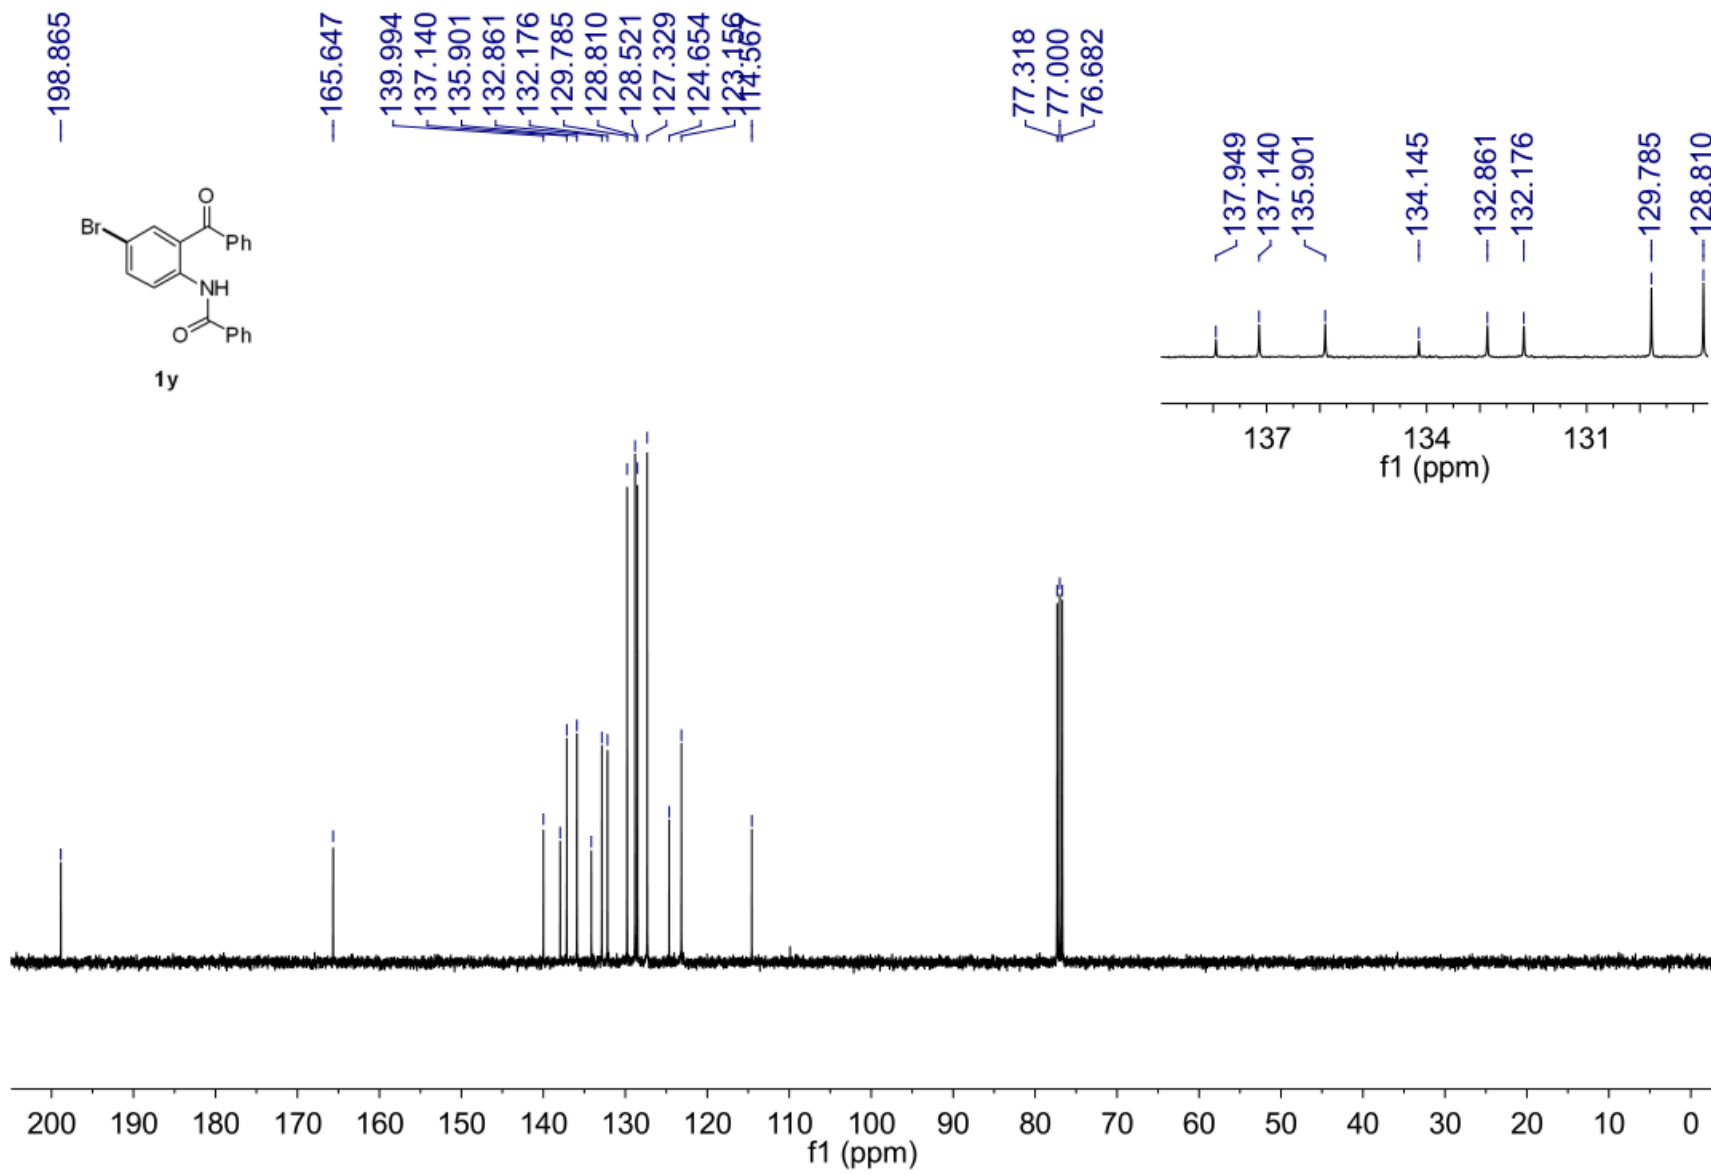

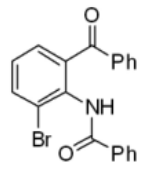

1z

8.709  
7.890  
7.872  
7.818  
7.800  
7.749  
7.747  
7.729  
7.727  
7.567  
7.548  
7.530  
7.503  
7.485  
7.466  
7.452  
7.433  
7.413  
7.410  
7.406  
7.389  
7.386  
7.367  
7.175  
7.156  
7.136

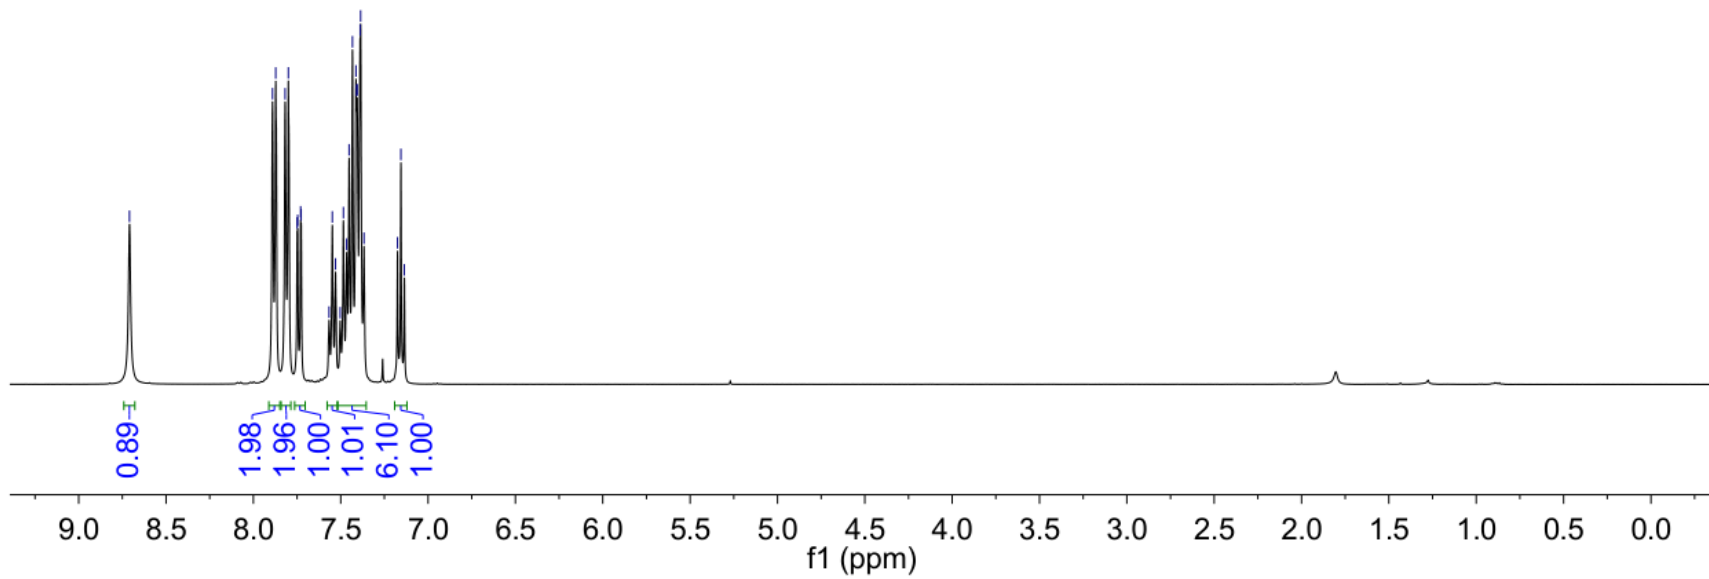

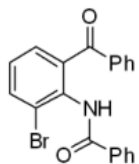

1z

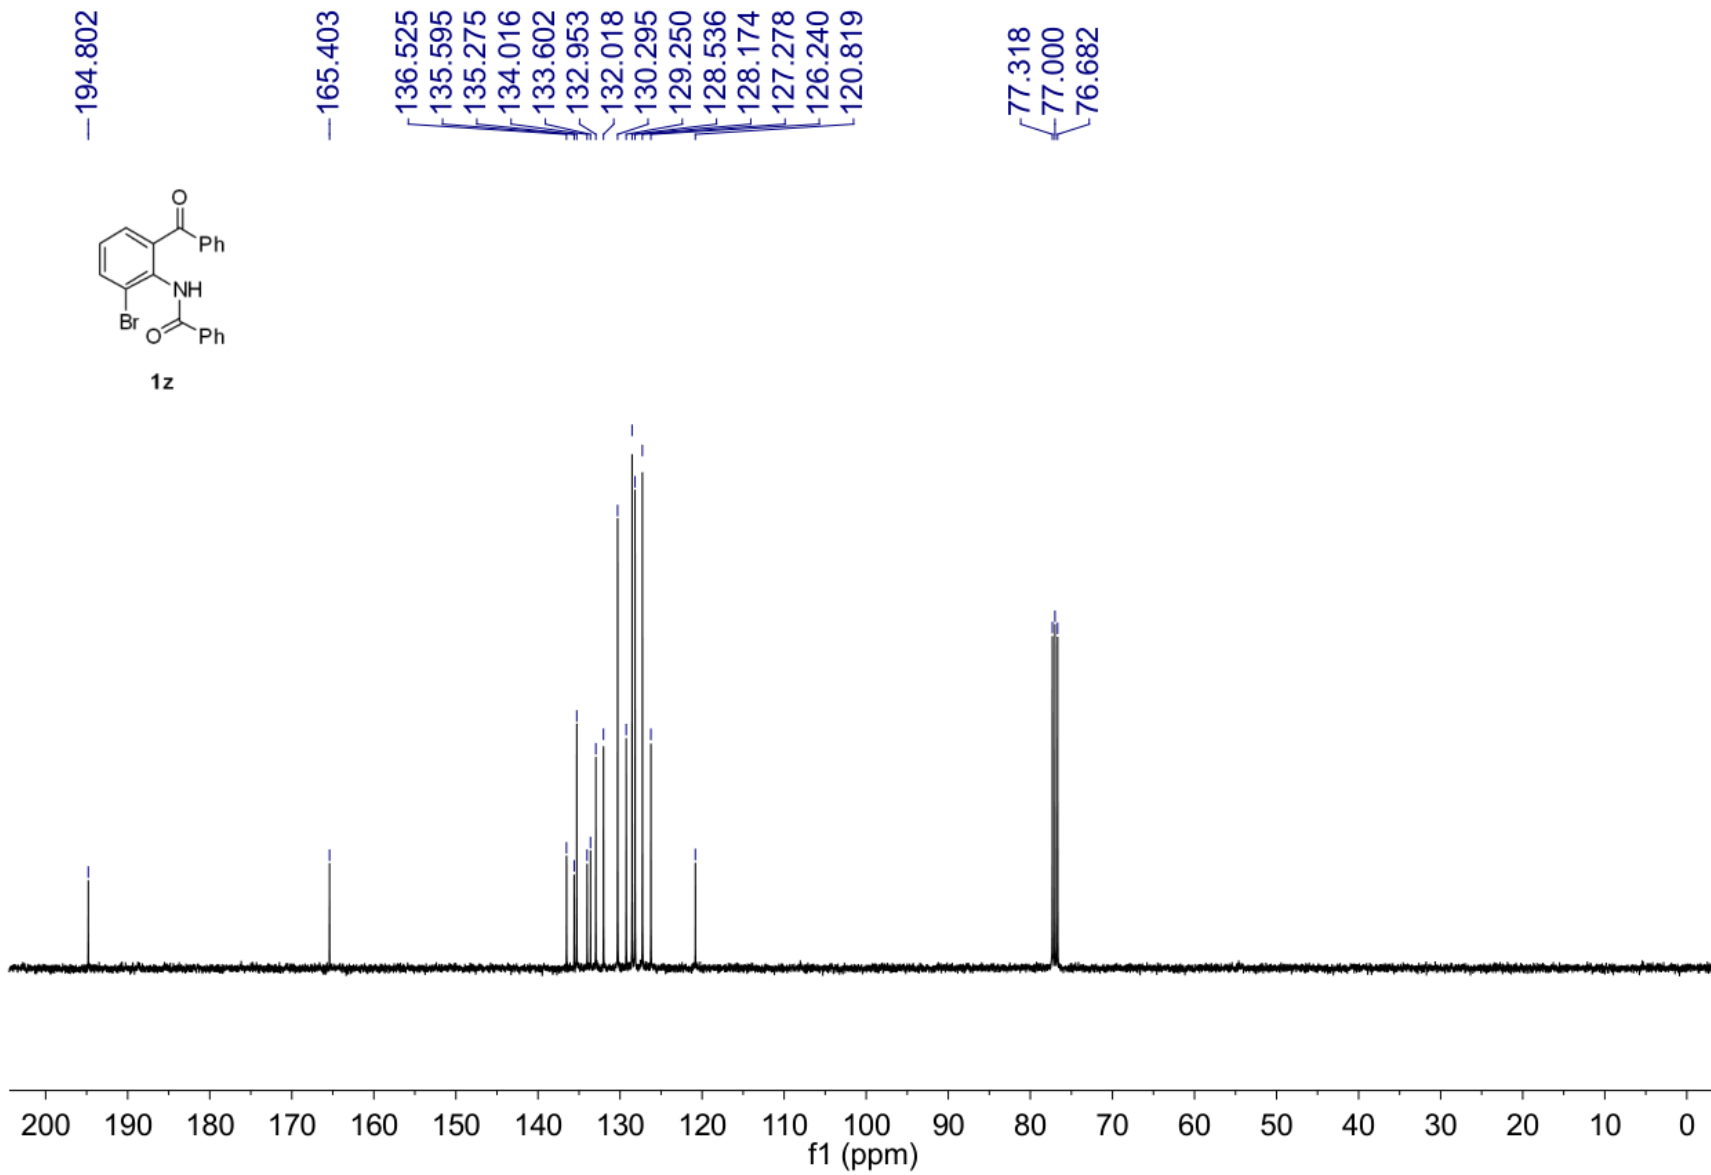

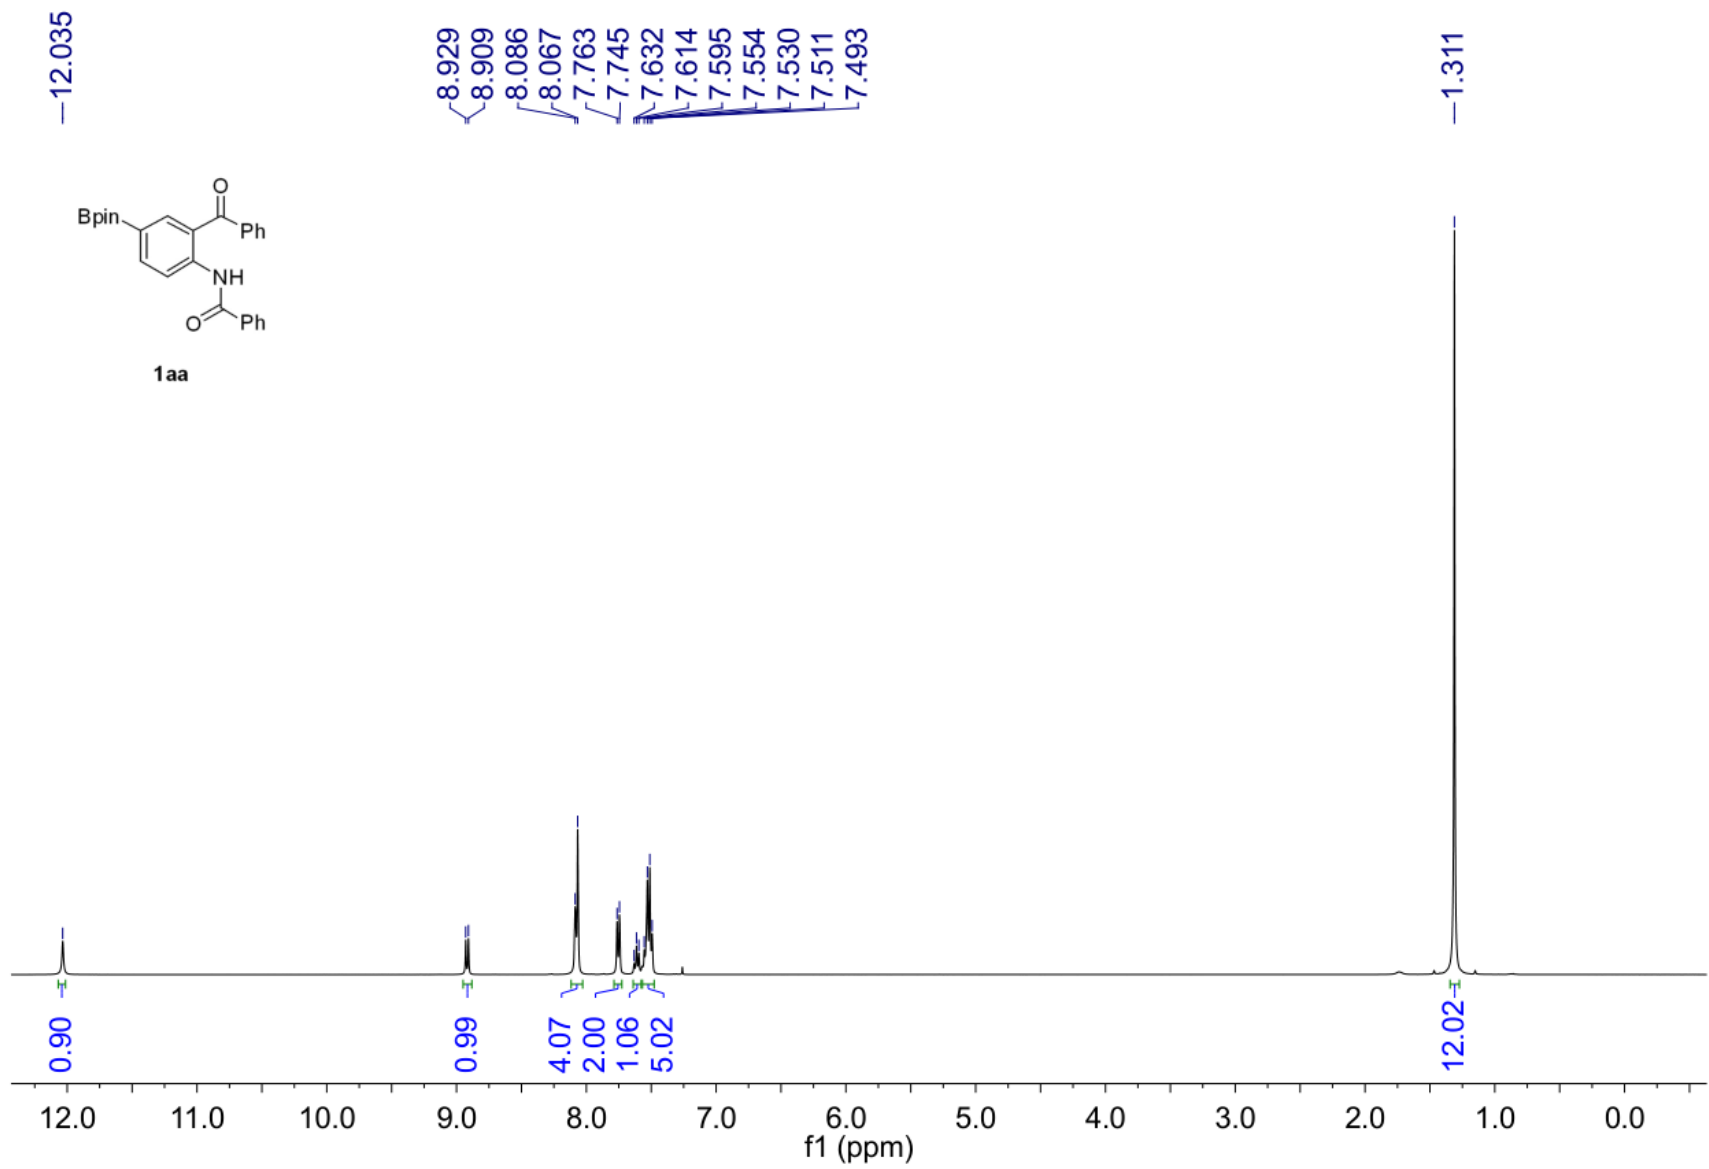

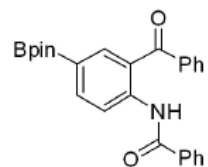

1aa

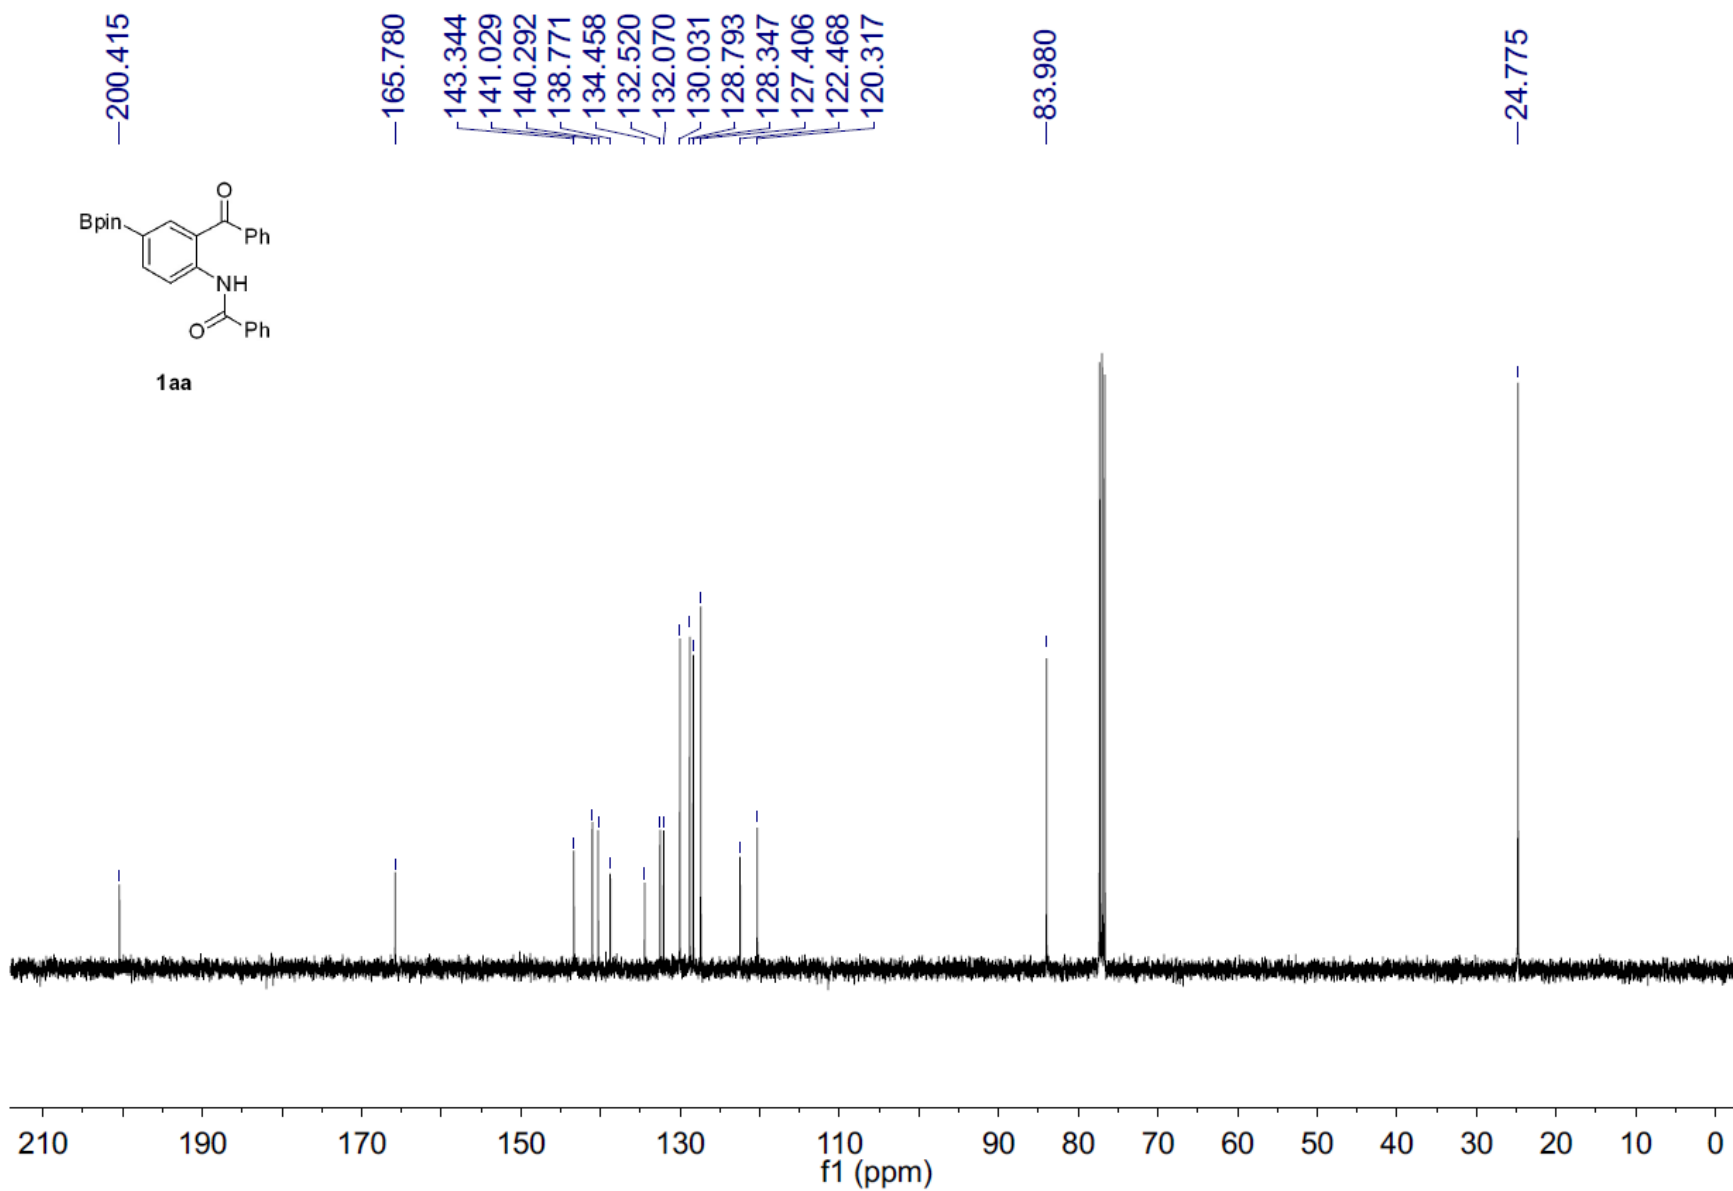

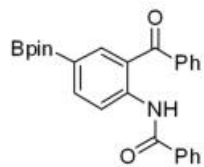

1aa

—31.402

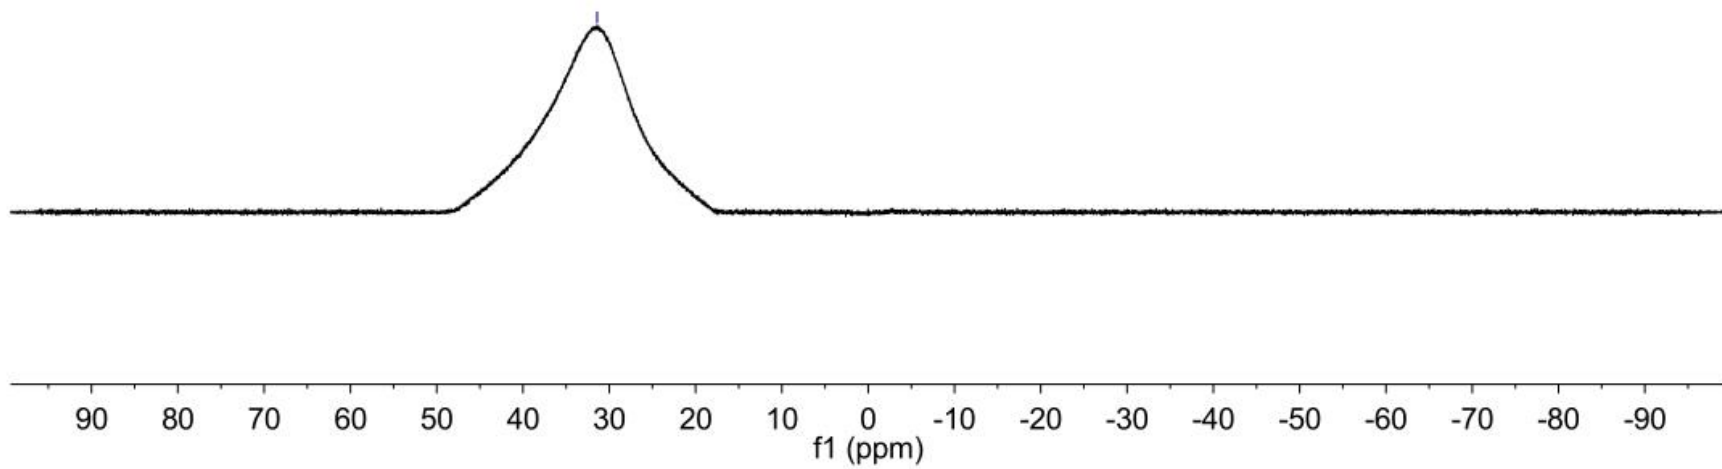



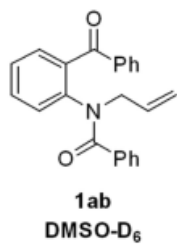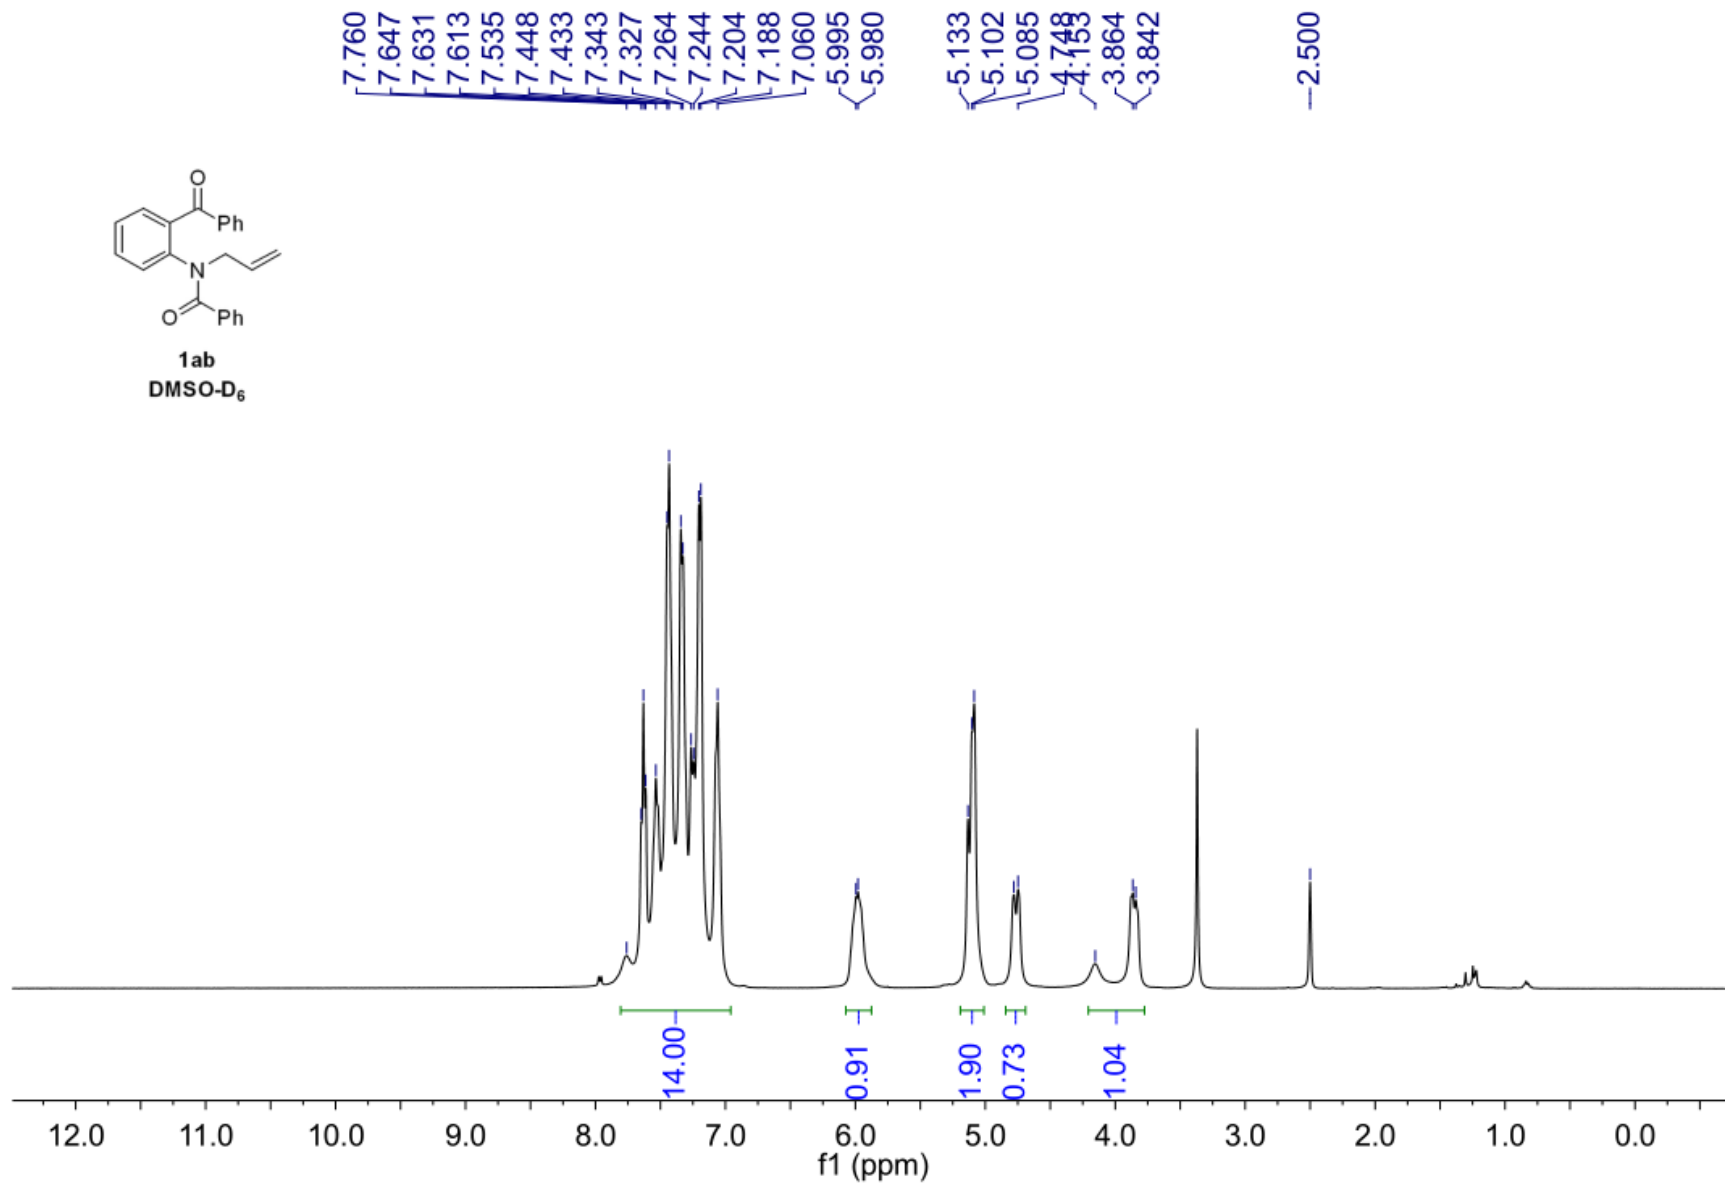

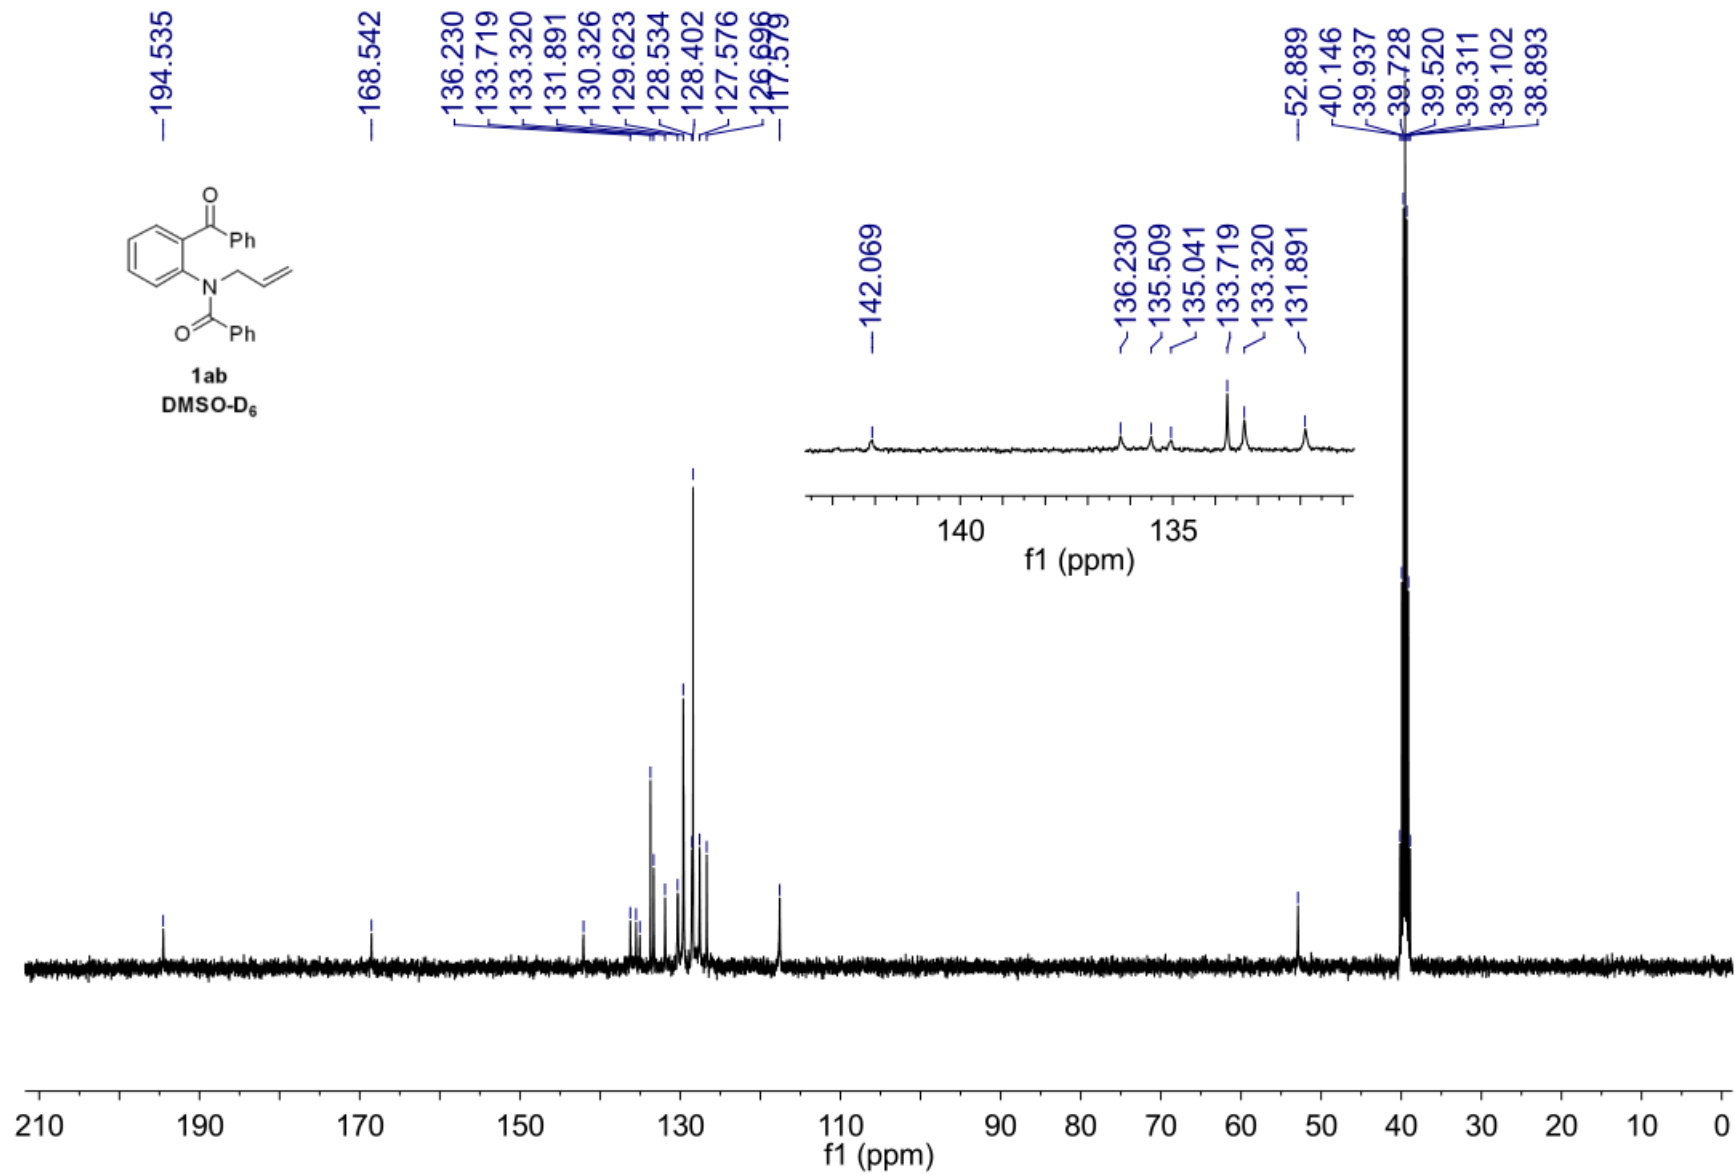

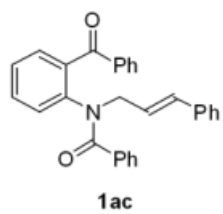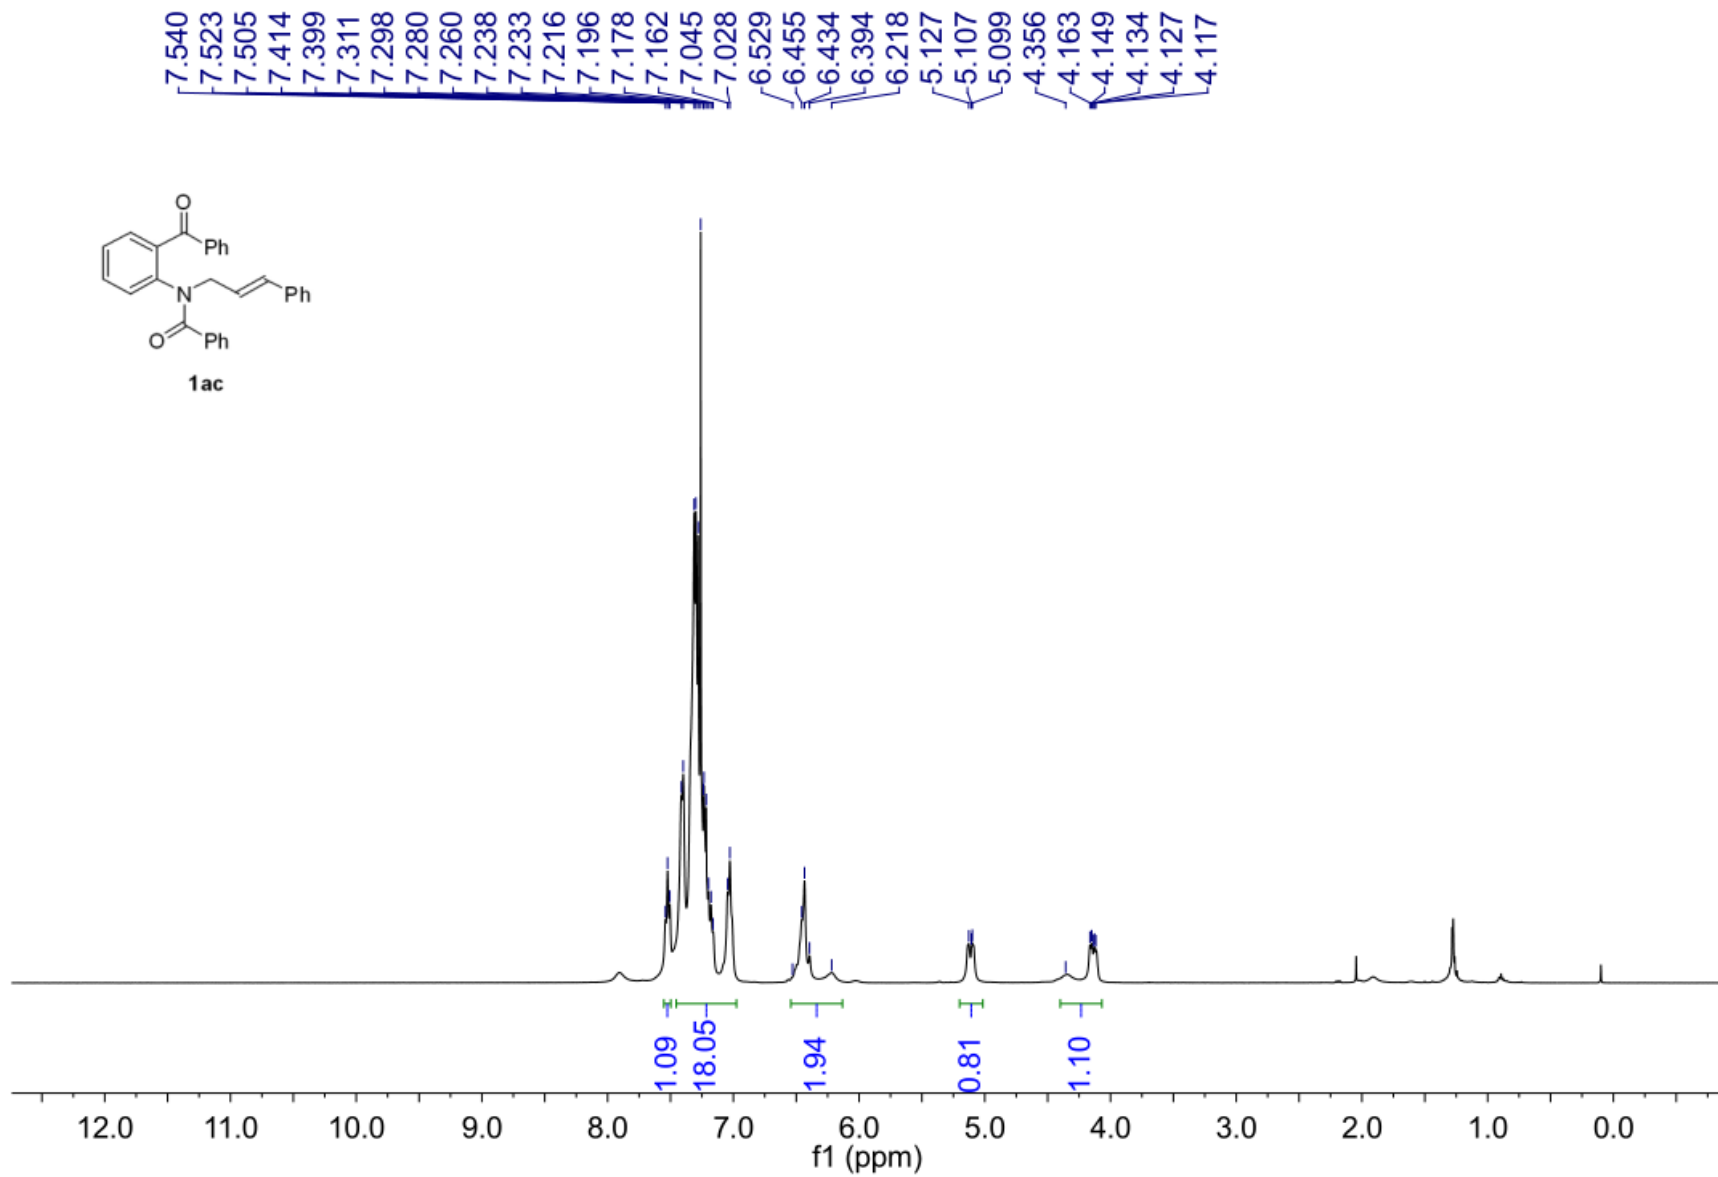

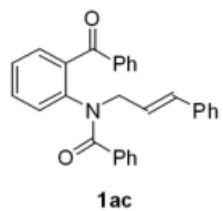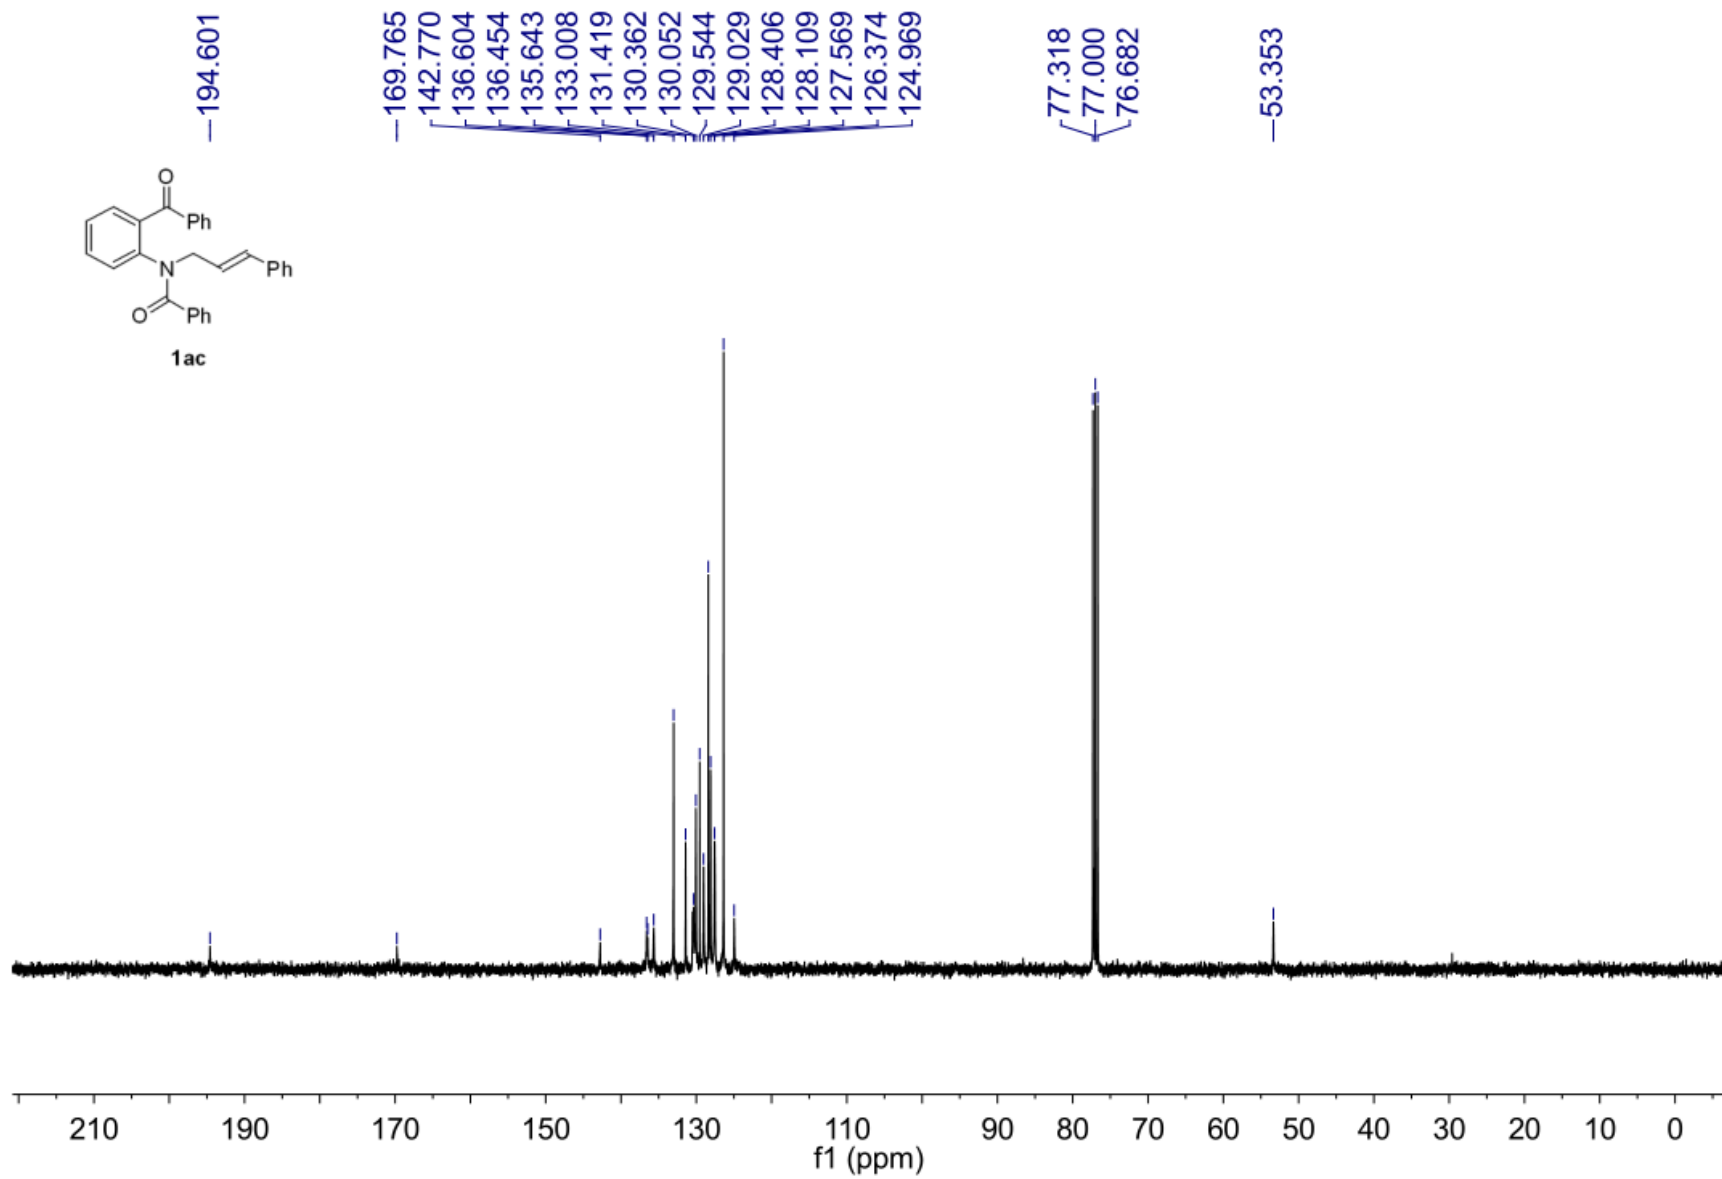

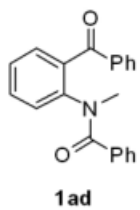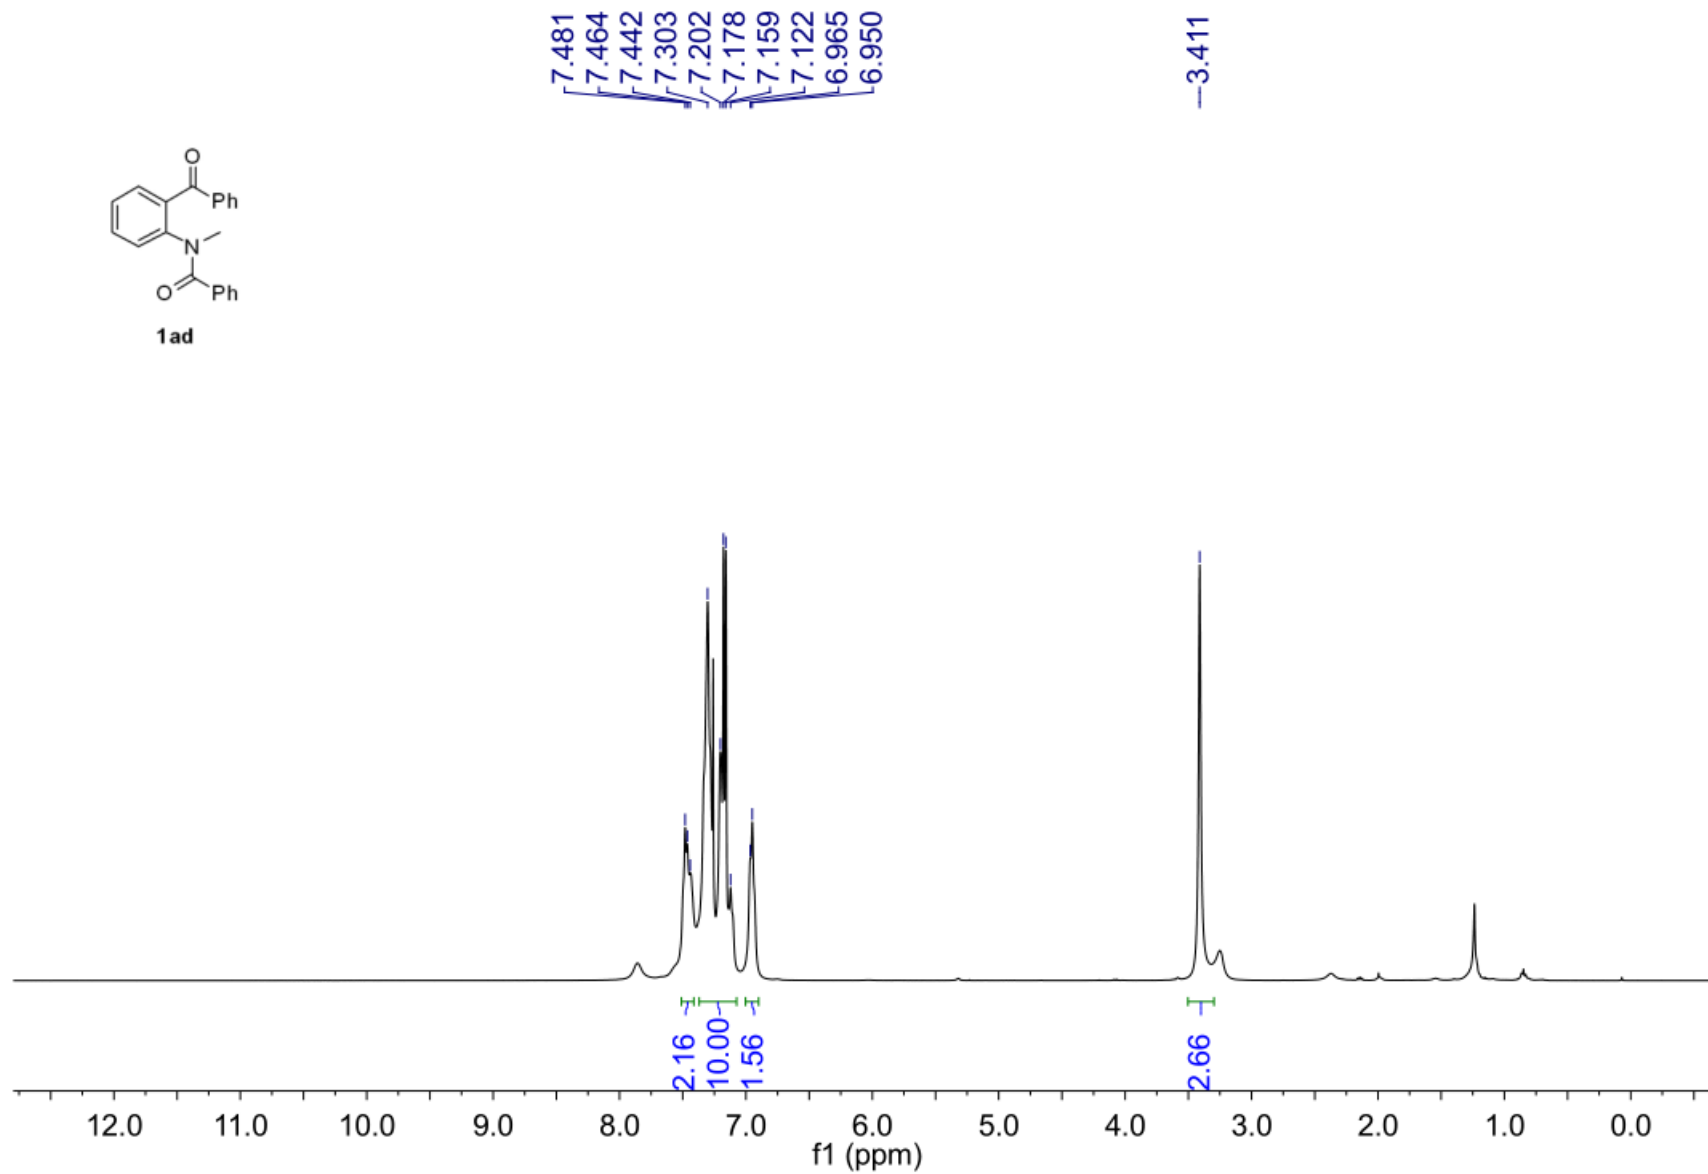

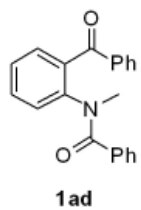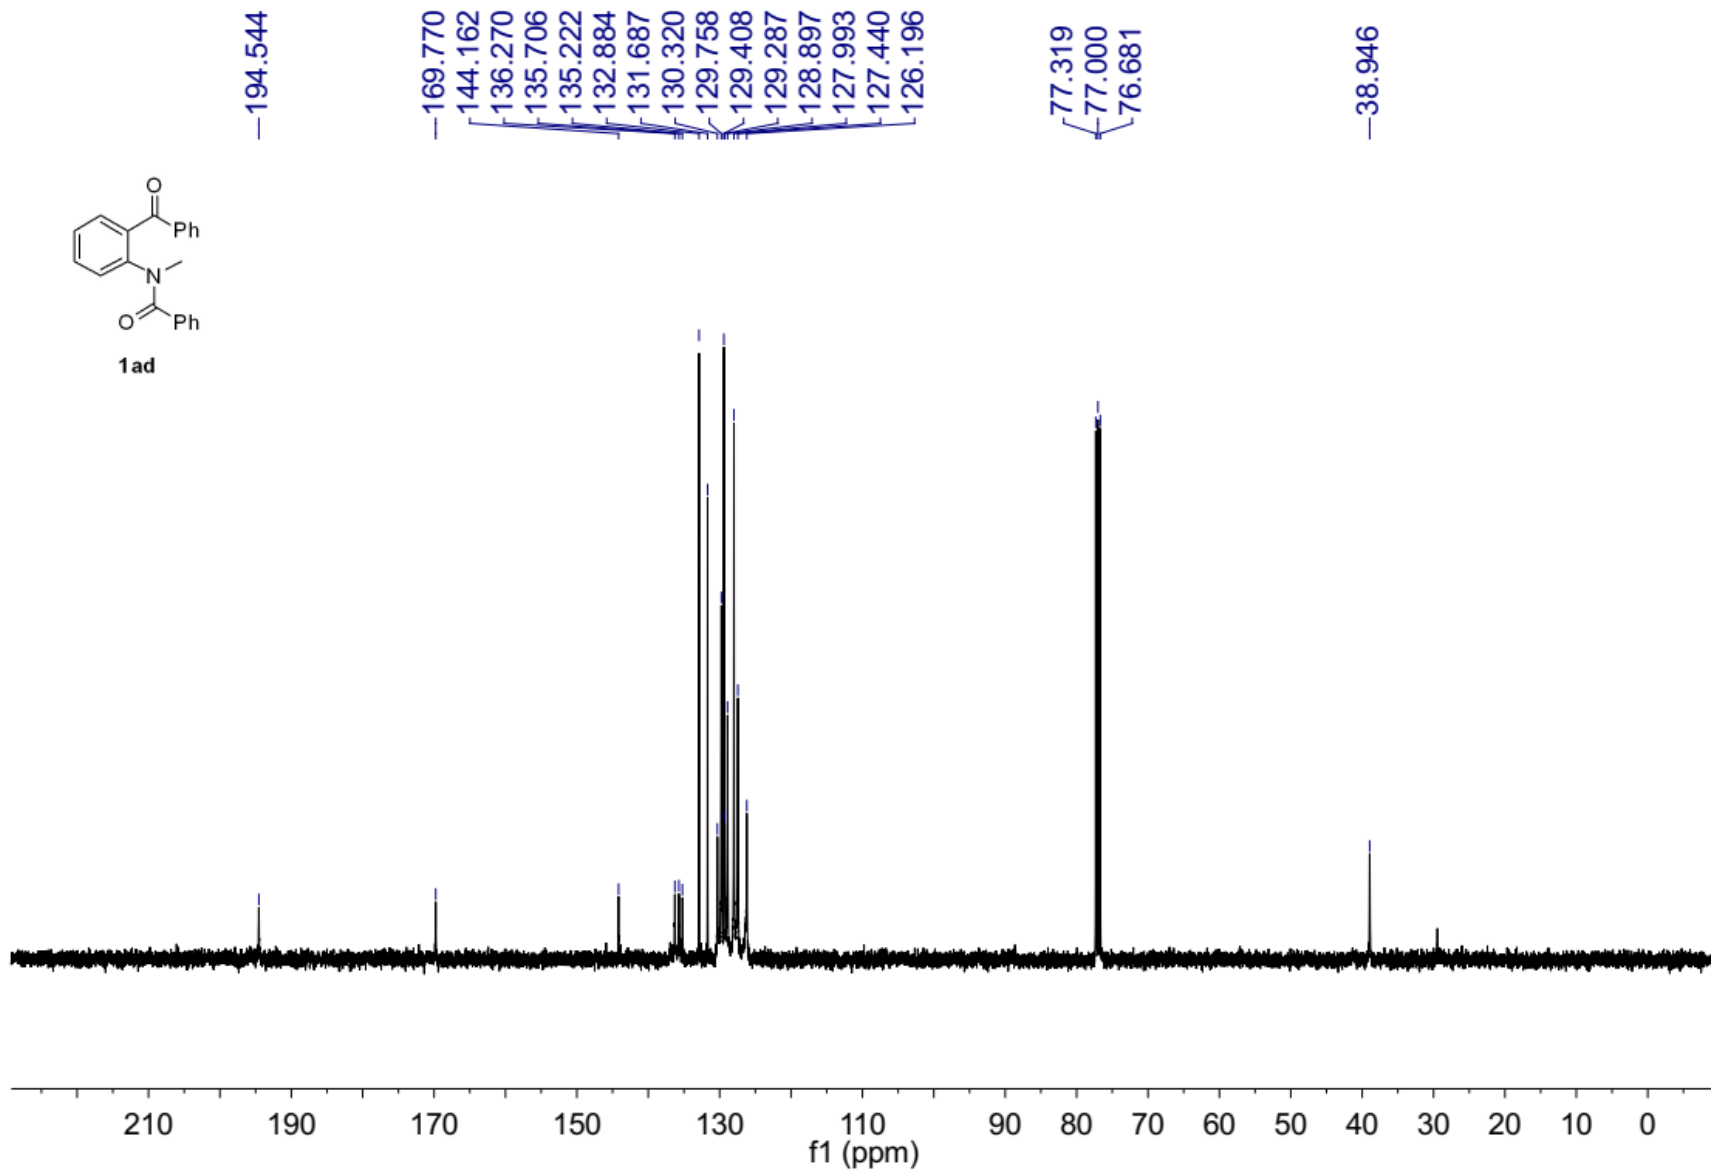

7.837  
7.834  
7.816  
7.813  
7.797  
7.794  
7.776  
7.772  
7.638  
7.620  
7.616  
7.597  
7.548  
7.544  
7.541  
7.526  
7.510  
7.507  
7.504  
7.488  
7.485  
7.482  
7.467  
7.461  
7.451  
7.448  
7.445  
7.410  
7.407  
7.391  
7.388  
7.384  
7.381  
7.375  
7.372  
7.367  
7.363  
7.360  
7.354  
7.348  
7.346  
7.332  
7.328  
7.260

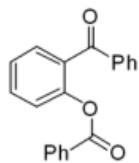

1ae

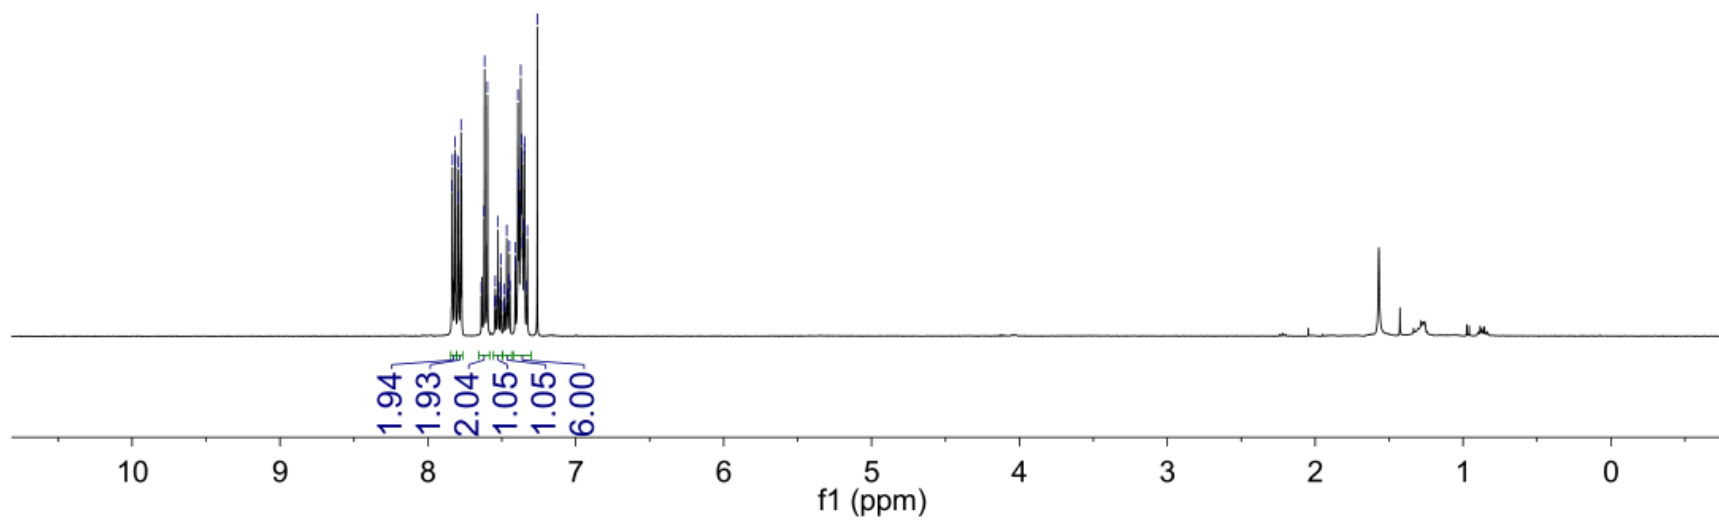

—194.829

—164.600

—148.807

137.579

133.476

132.915

132.168

131.863

130.444

129.976

129.731

128.788

128.308

128.271

125.770

123.273

77.317

77.000

76.682

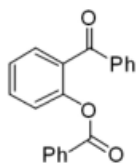

**1ae**

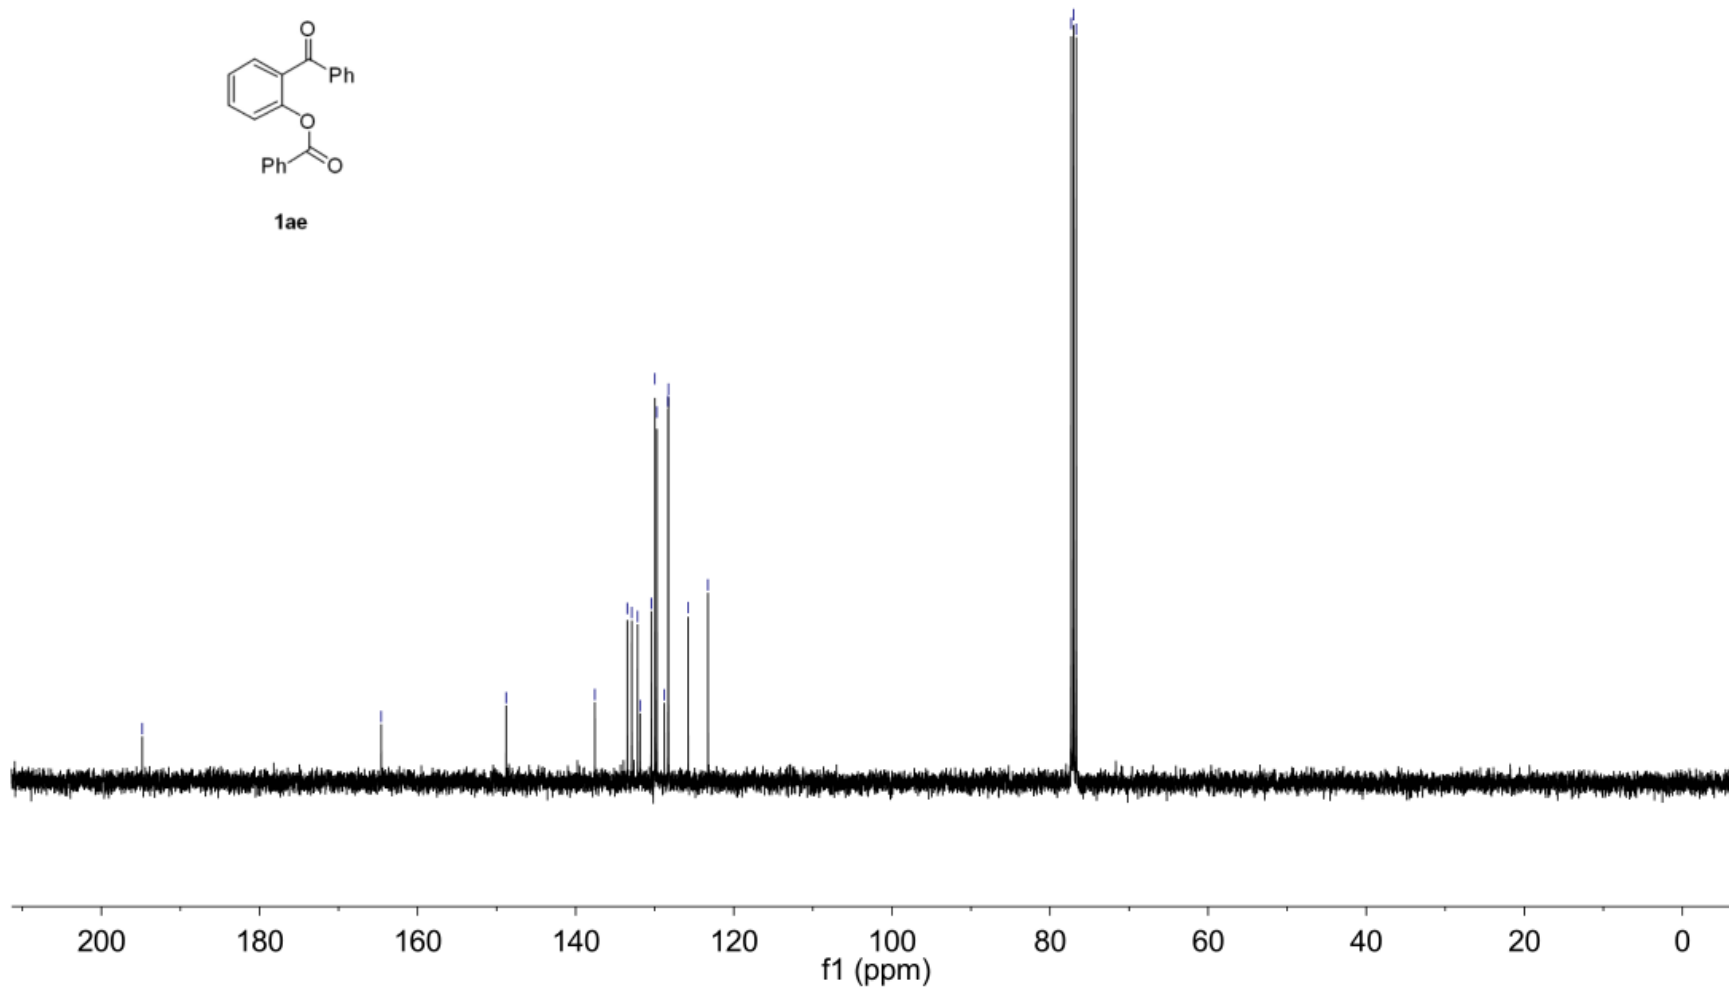



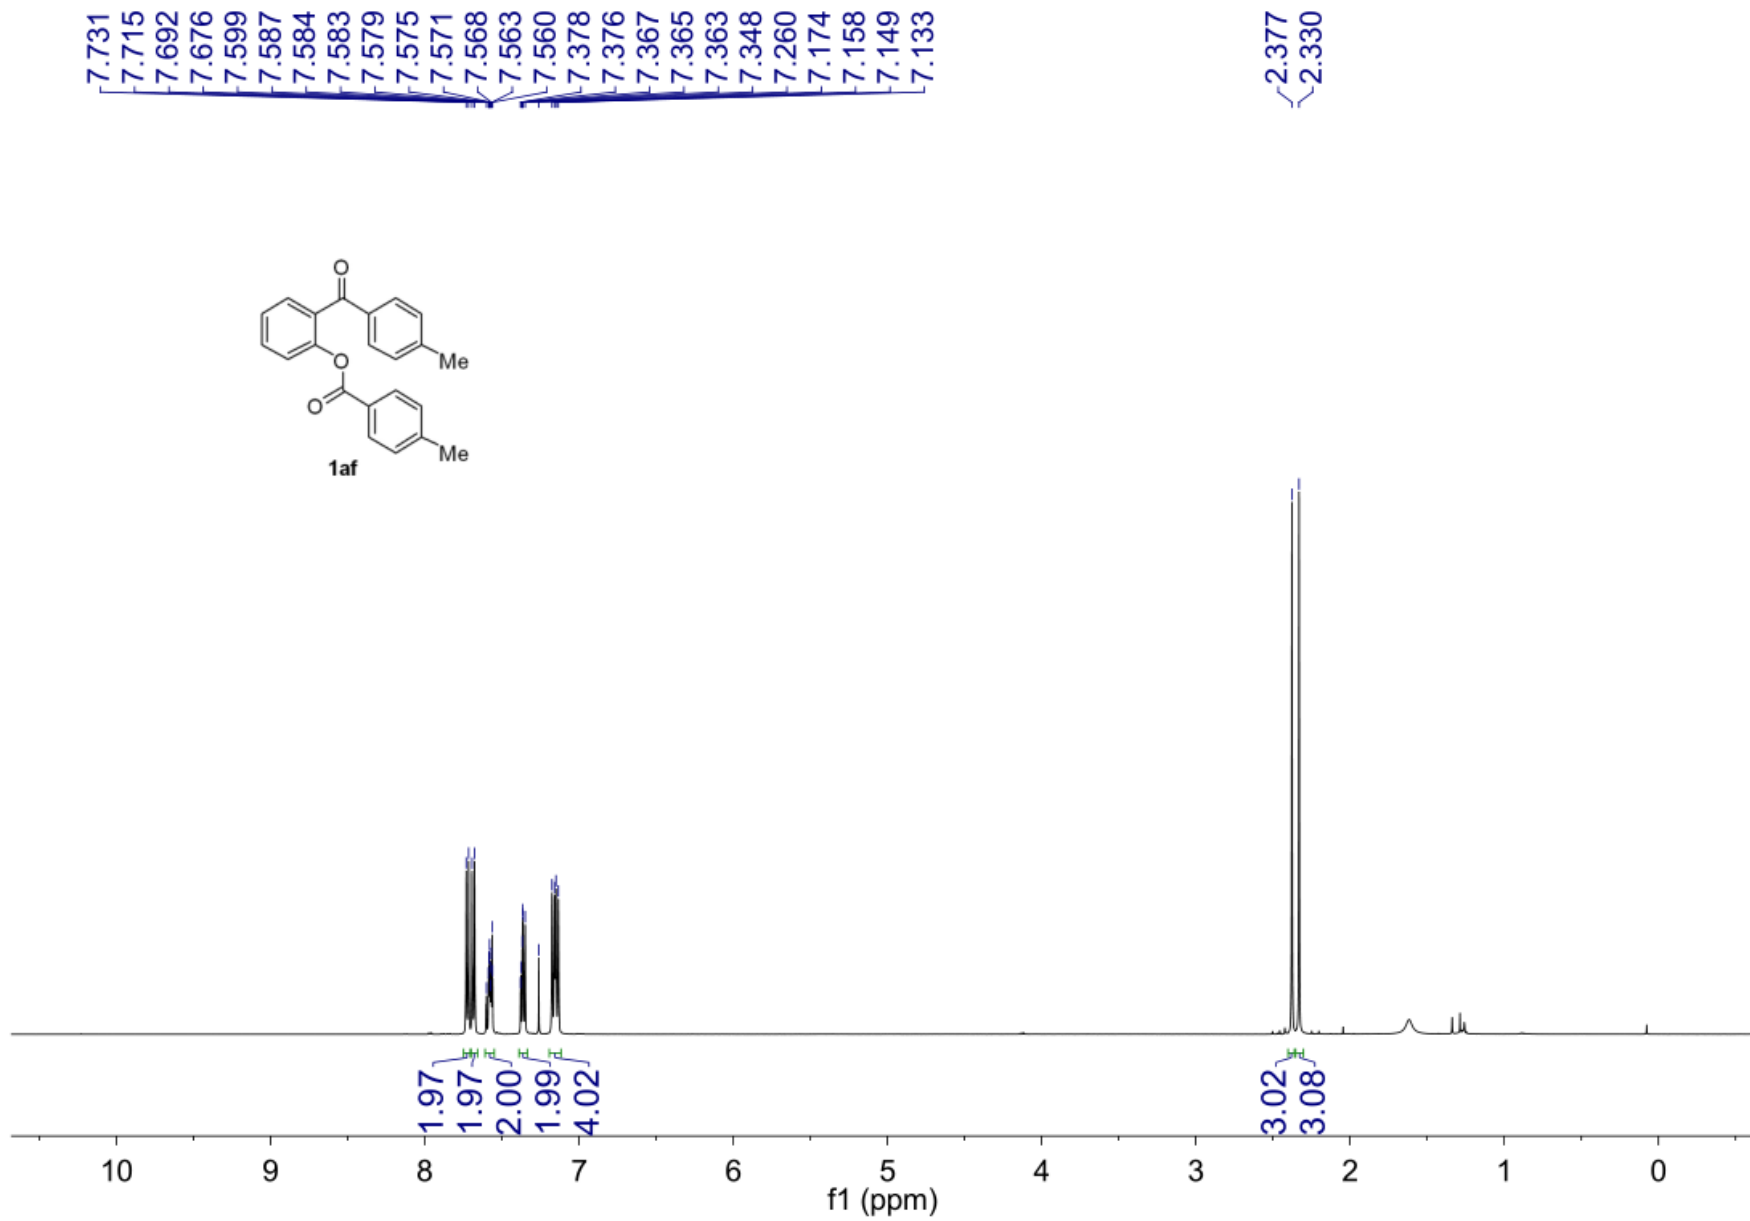

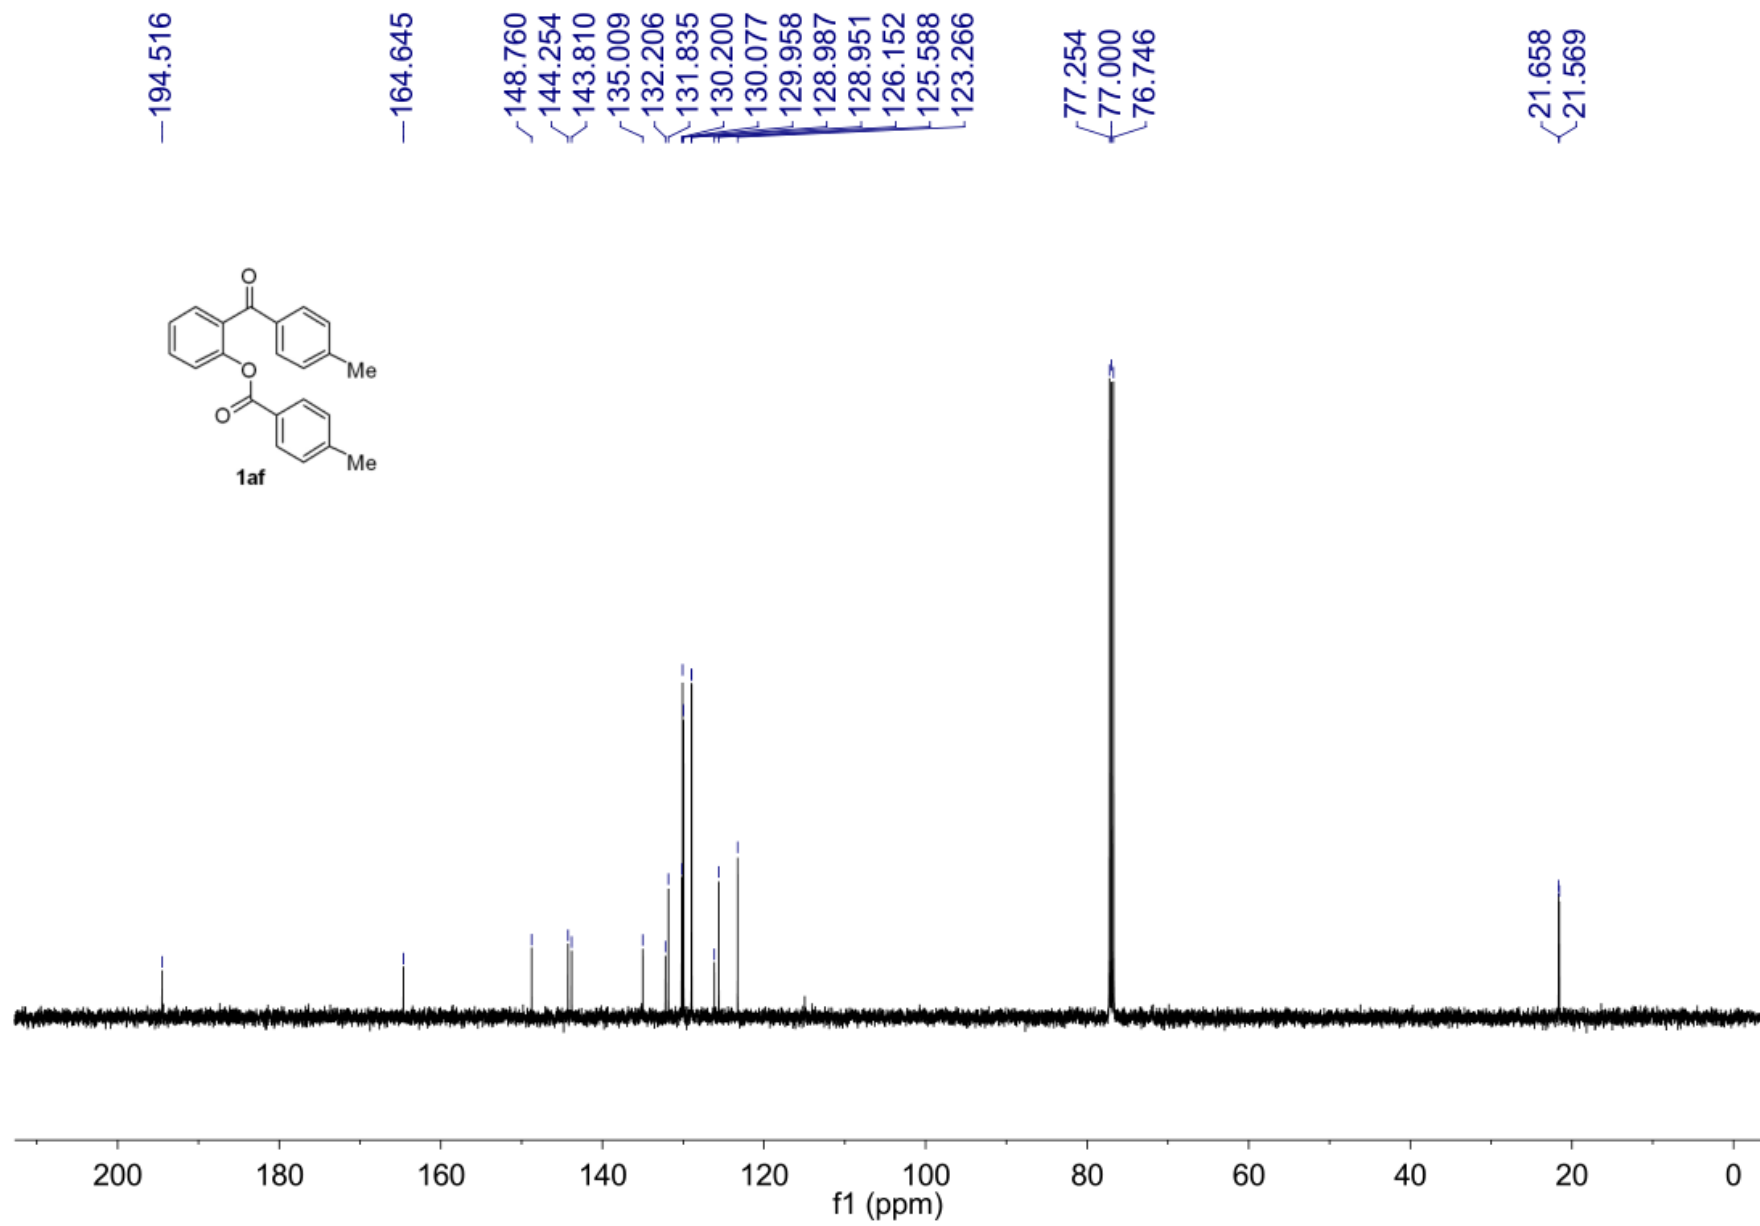

8.180  
8.176  
8.160  
8.156  
7.784  
7.781  
7.768  
7.764  
7.760  
7.749  
7.747  
7.742  
7.739  
7.731  
7.726  
7.721  
7.718  
7.554  
7.535  
7.516  
7.503  
7.497  
7.484  
7.480  
7.469  
7.466  
7.326  
7.304  
7.284  
7.269  
7.265

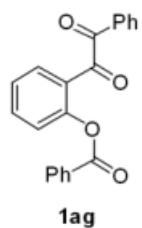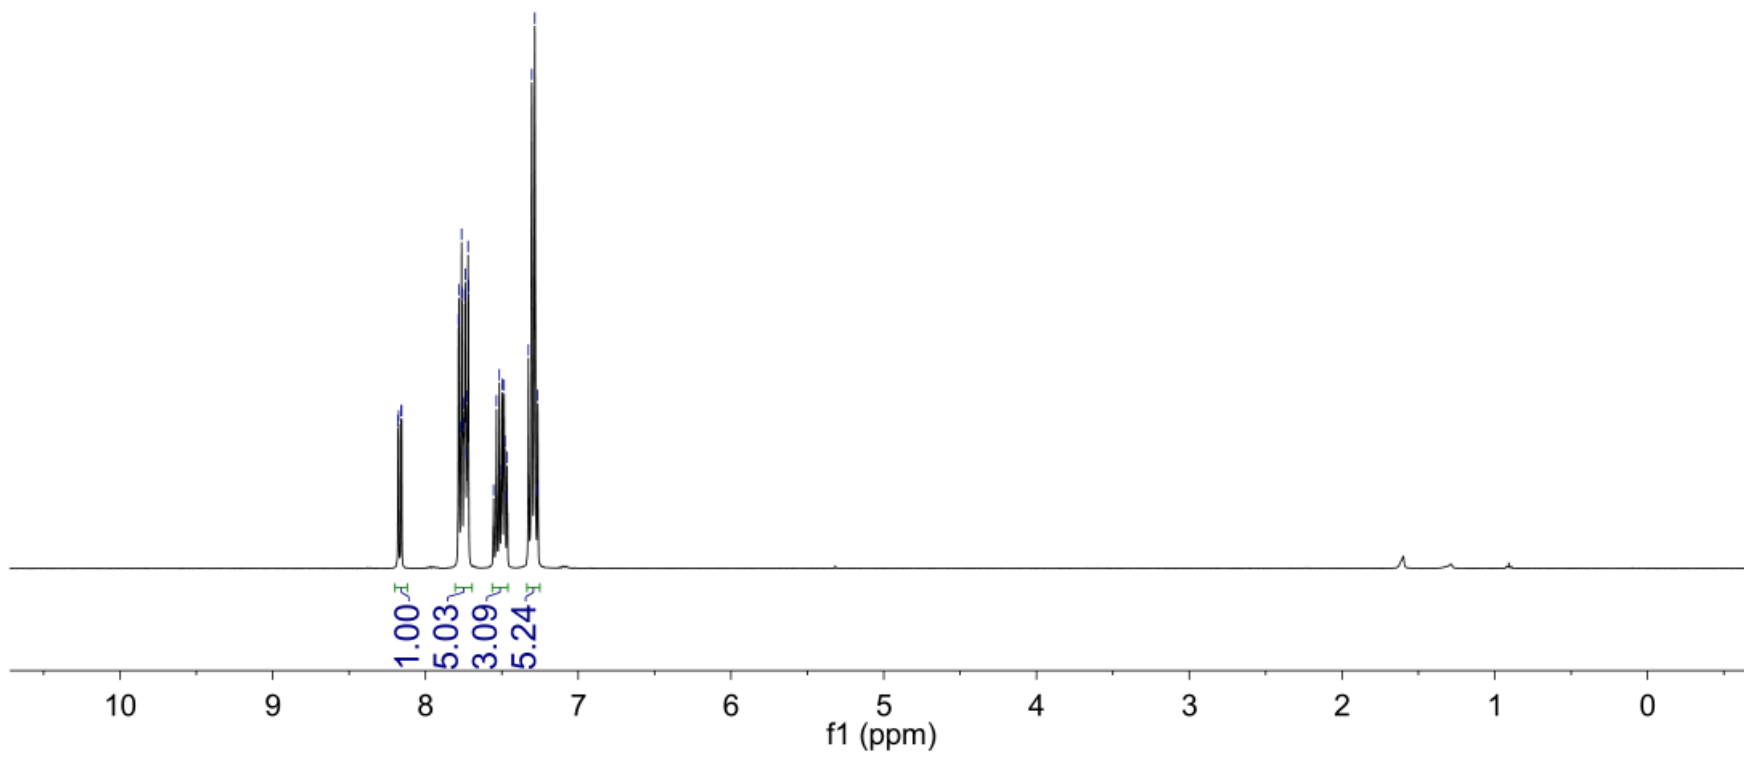

193.075  
192.634

164.325

151.279  
135.700  
134.443  
133.648  
131.882  
131.143  
129.999  
129.914  
128.591  
128.196  
128.066  
127.118  
126.558  
123.996

77.318  
77.000  
76.683

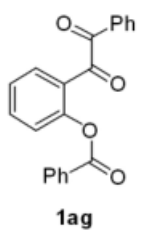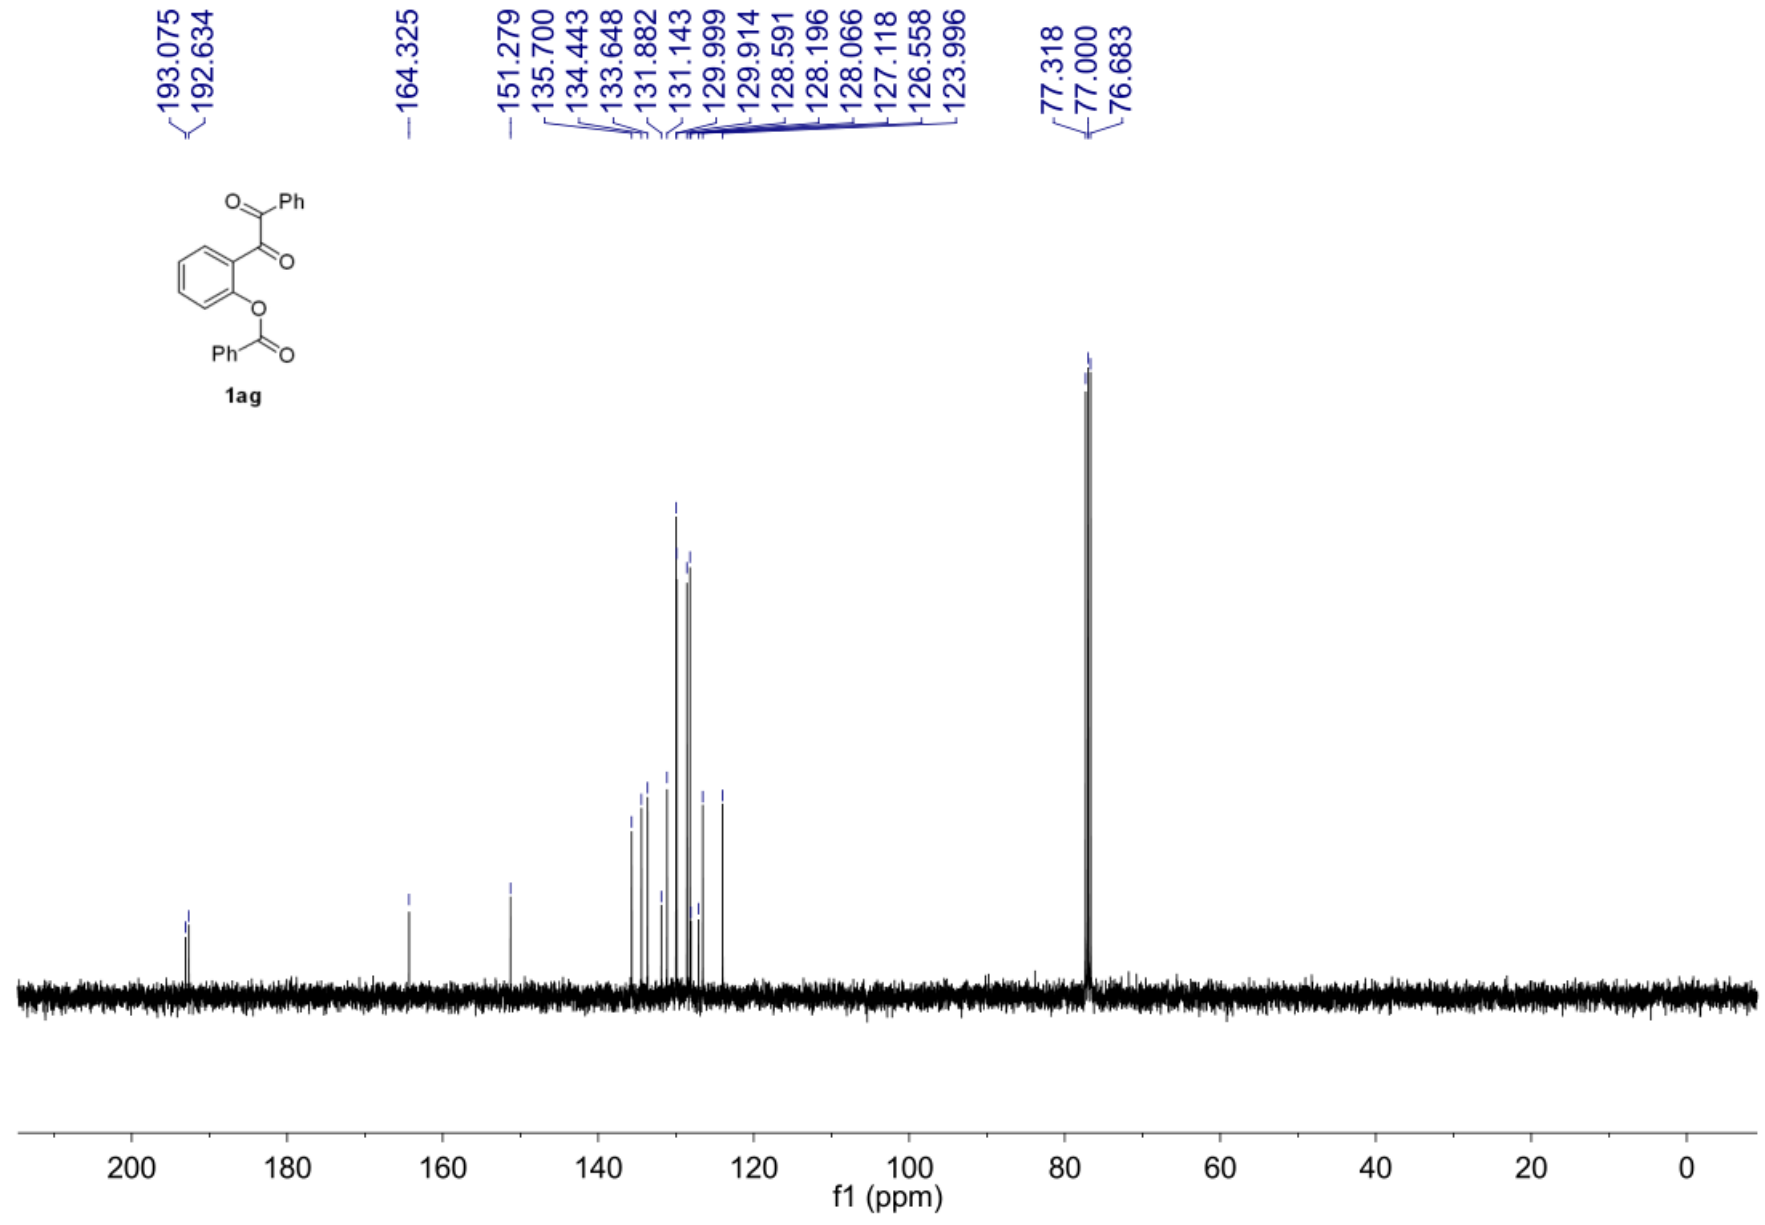

8.129  
8.125  
8.109  
8.105  
7.766  
7.762  
7.746  
7.744  
7.727  
7.723  
7.716  
7.712  
7.699  
7.695  
7.667  
7.663  
7.650  
7.646  
7.515  
7.512  
7.495  
7.494  
7.476  
7.474  
7.330  
7.326  
7.313  
7.309  
7.284  
7.279  
7.262

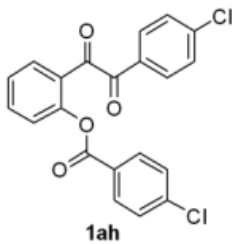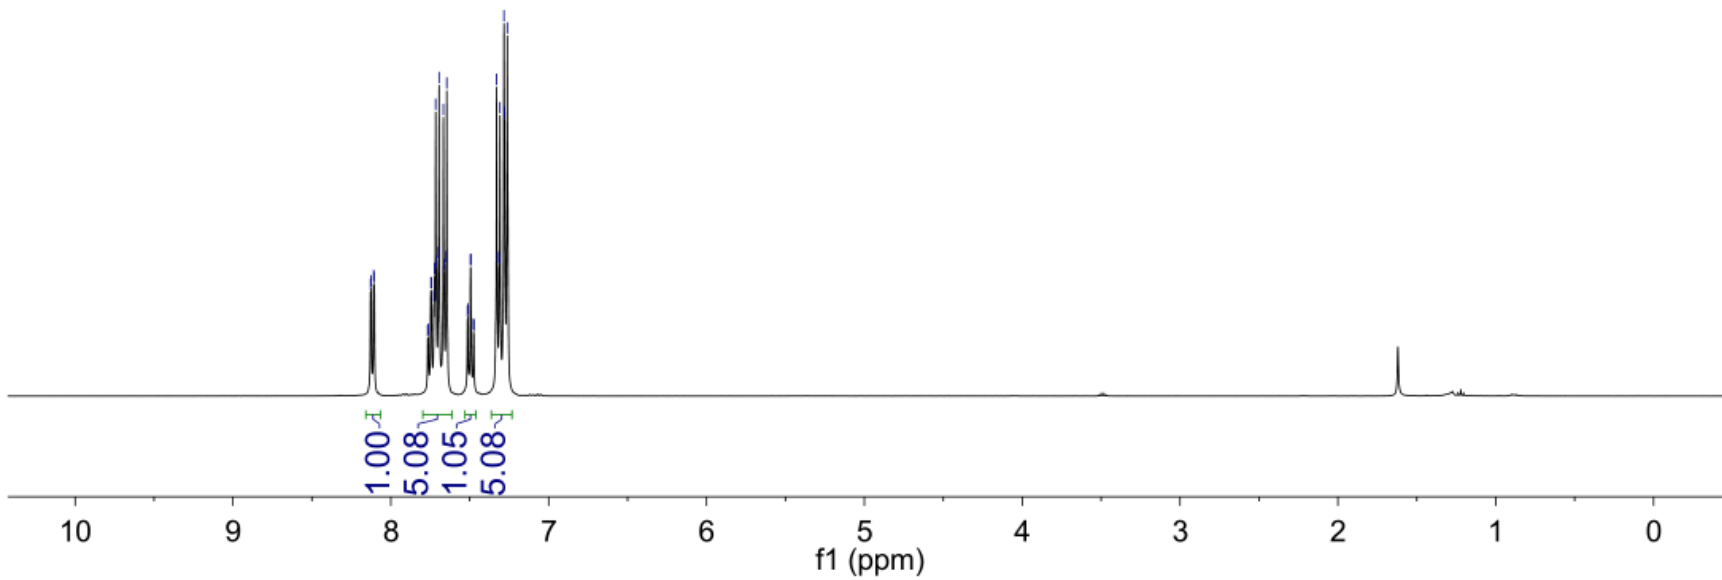

192.384  
191.161

163.510

150.905  
141.373  
140.478  
135.873  
131.259  
131.165  
130.217  
129.038  
128.633  
127.012  
126.811  
126.546  
123.874

77.318  
77.000  
76.682

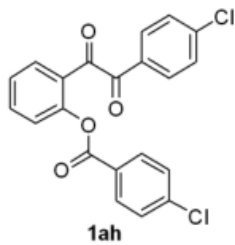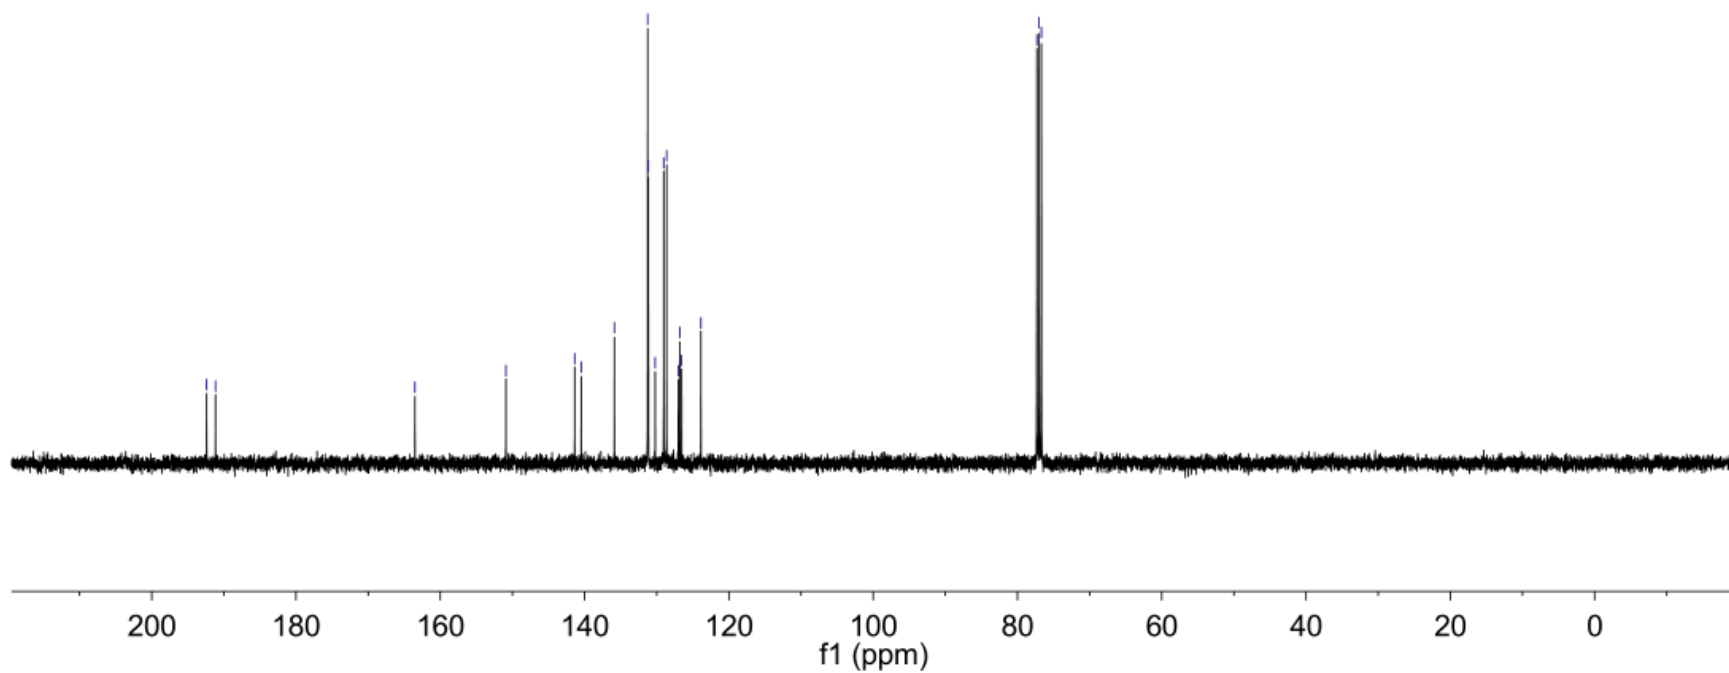

8.131  
8.127  
8.111  
8.108  
7.774  
7.771  
7.752  
7.736  
7.732  
7.630  
7.608  
7.583  
7.562  
7.522  
7.505  
7.484  
7.453  
7.432  
7.275  
7.260

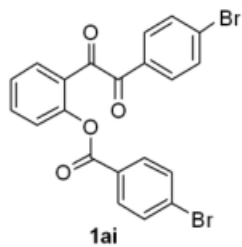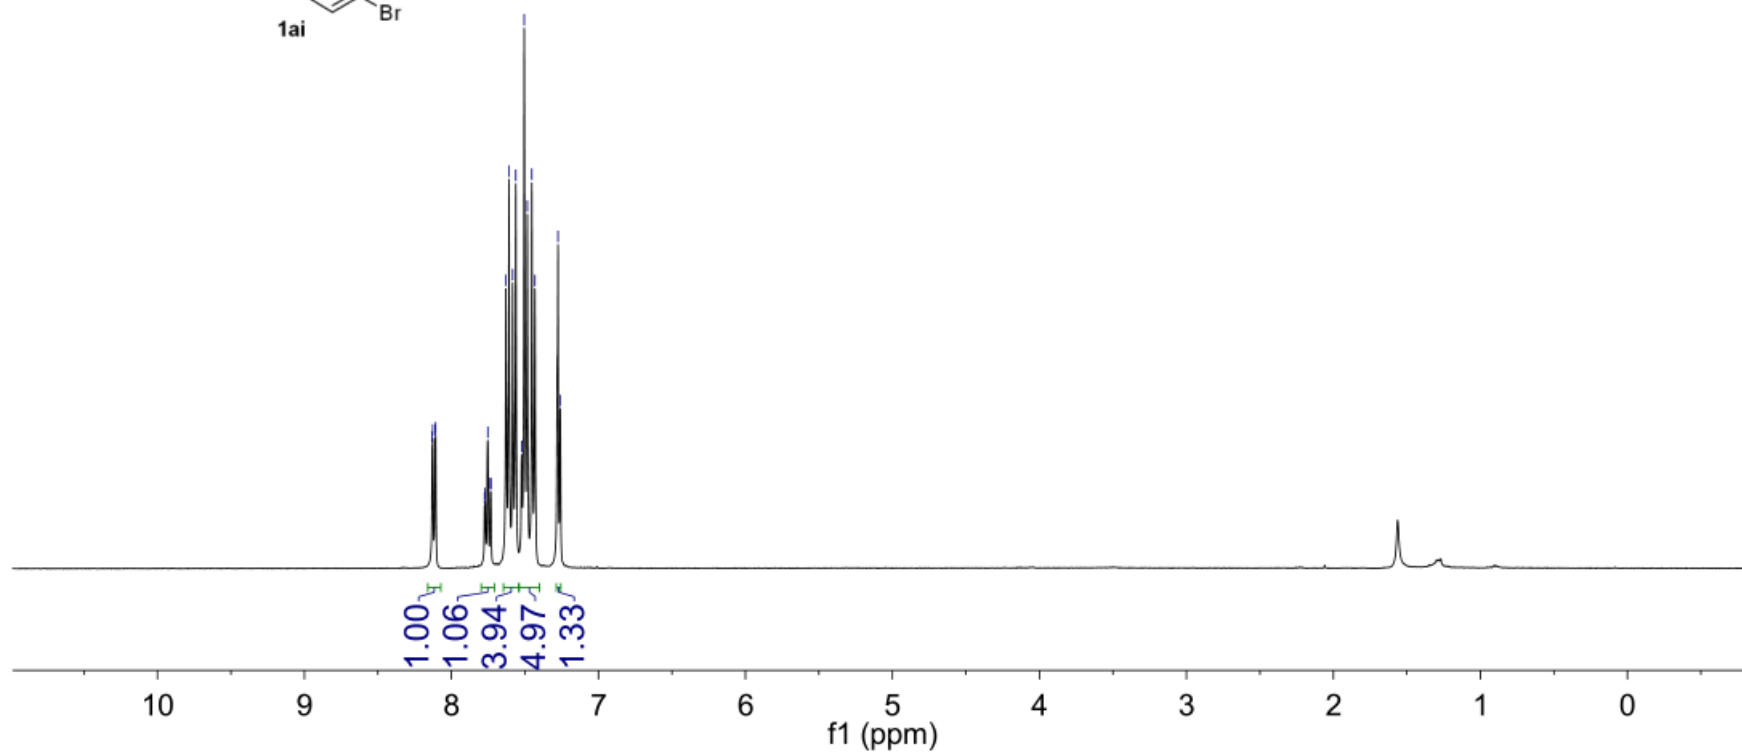

192.373  
191.364

163.699

150.894  
135.884  
132.062  
131.678  
131.331  
131.274  
131.189  
130.601  
130.327  
129.220  
127.085  
127.004  
126.851  
123.870

77.317  
77.000  
76.682

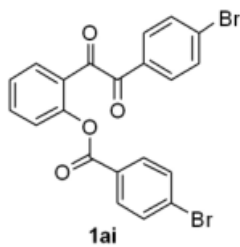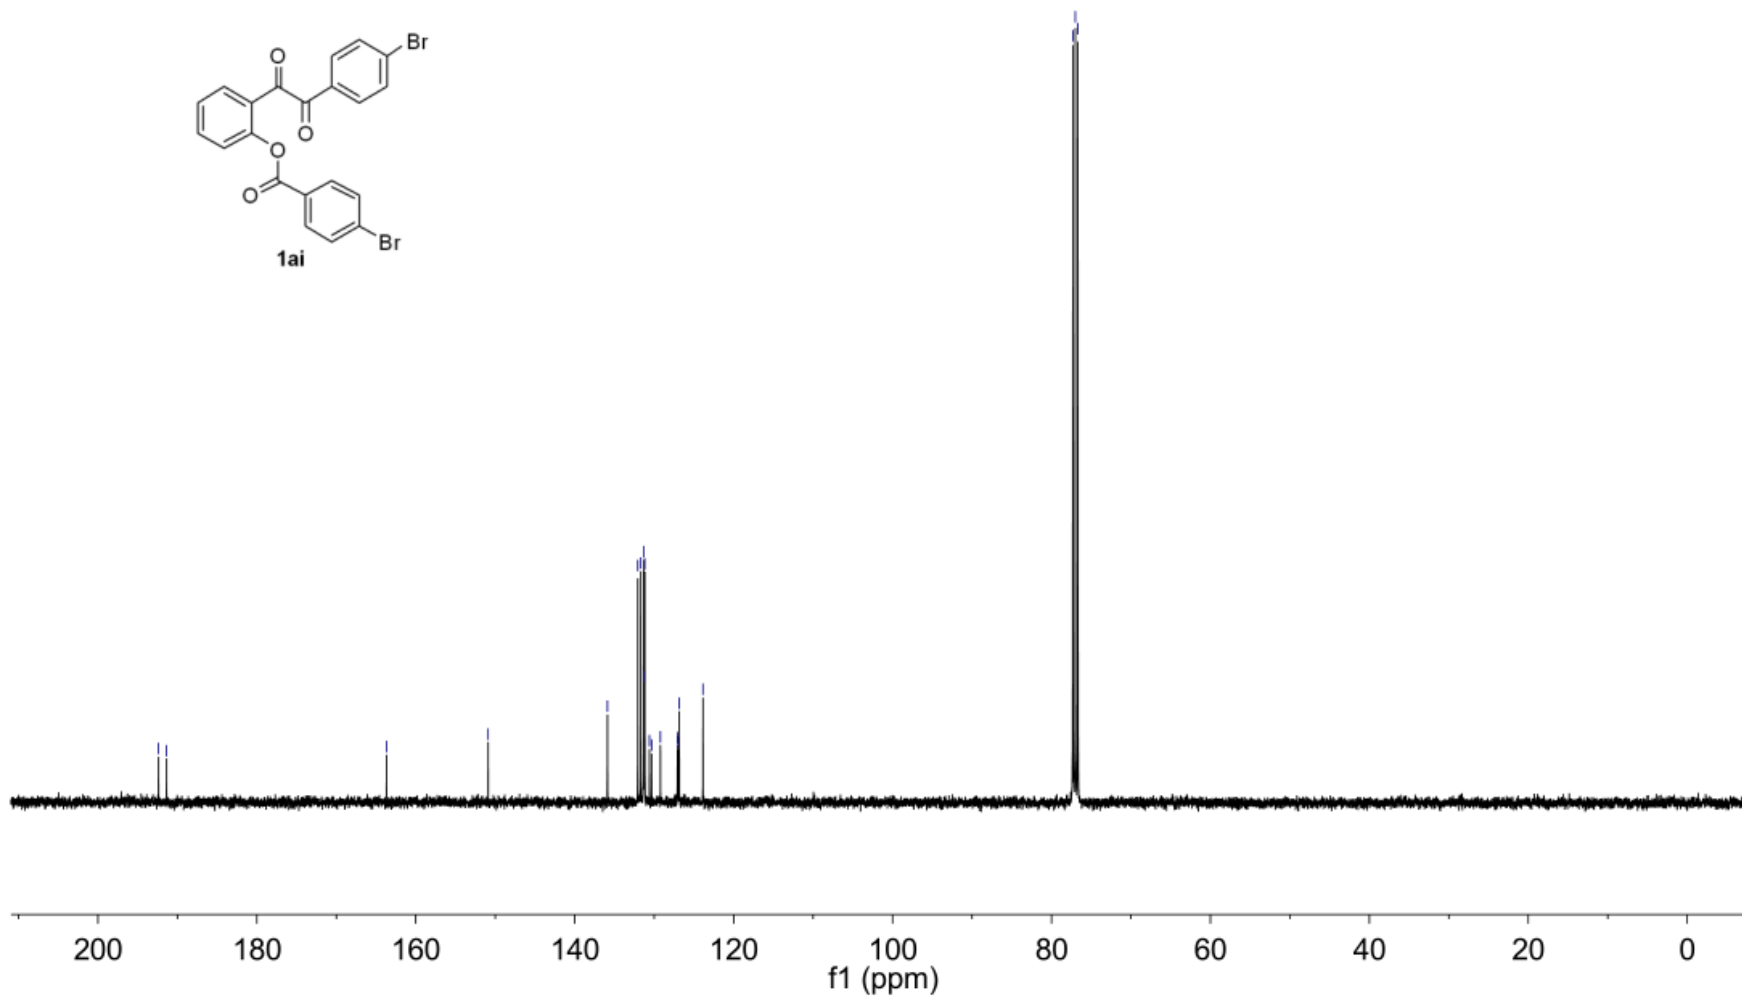



7.846  
7.828  
7.825  
7.815  
7.797  
7.794  
7.681  
7.678  
7.662  
7.659  
7.623  
7.619  
7.605  
7.601  
7.586  
7.582  
7.571  
7.552  
7.549  
7.537  
7.534  
7.519  
7.514  
7.510  
7.495  
7.417  
7.410  
7.397  
7.390  
7.379  
7.371  
7.260

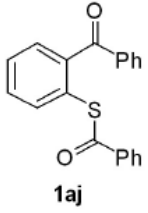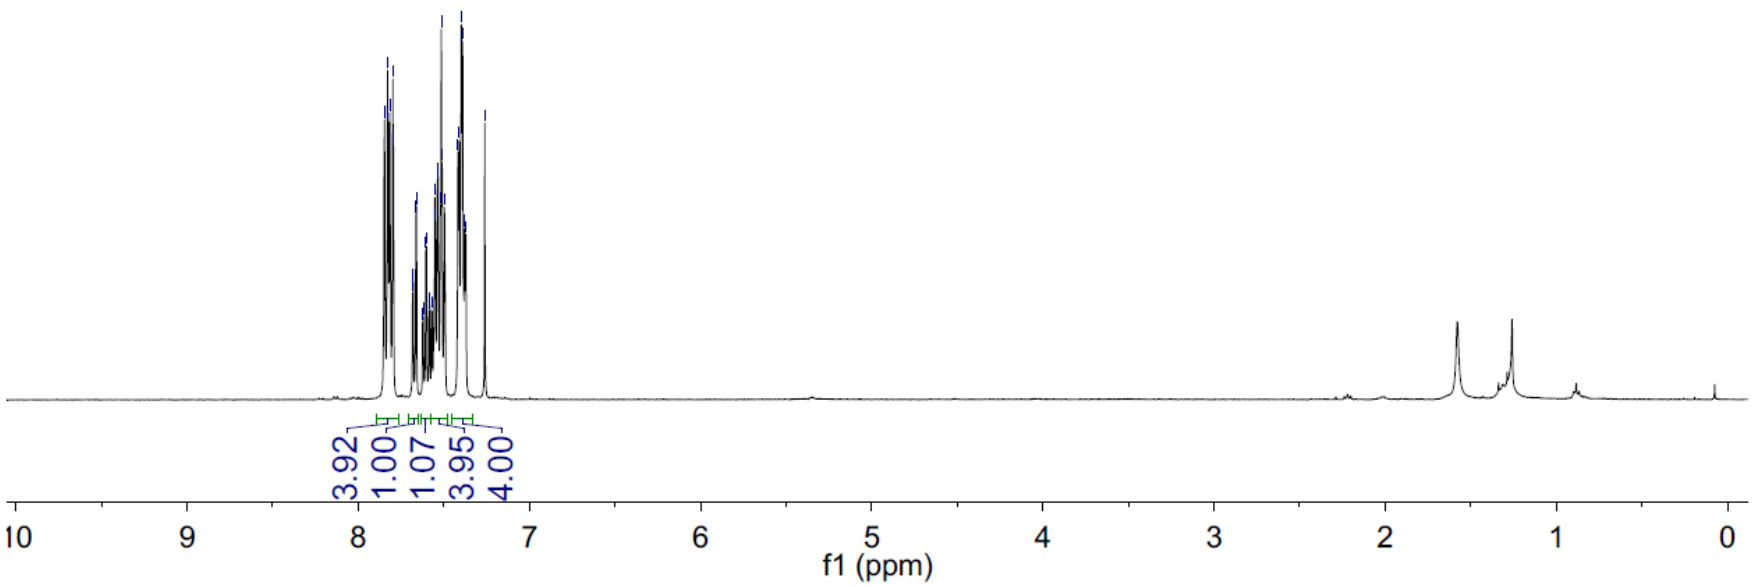

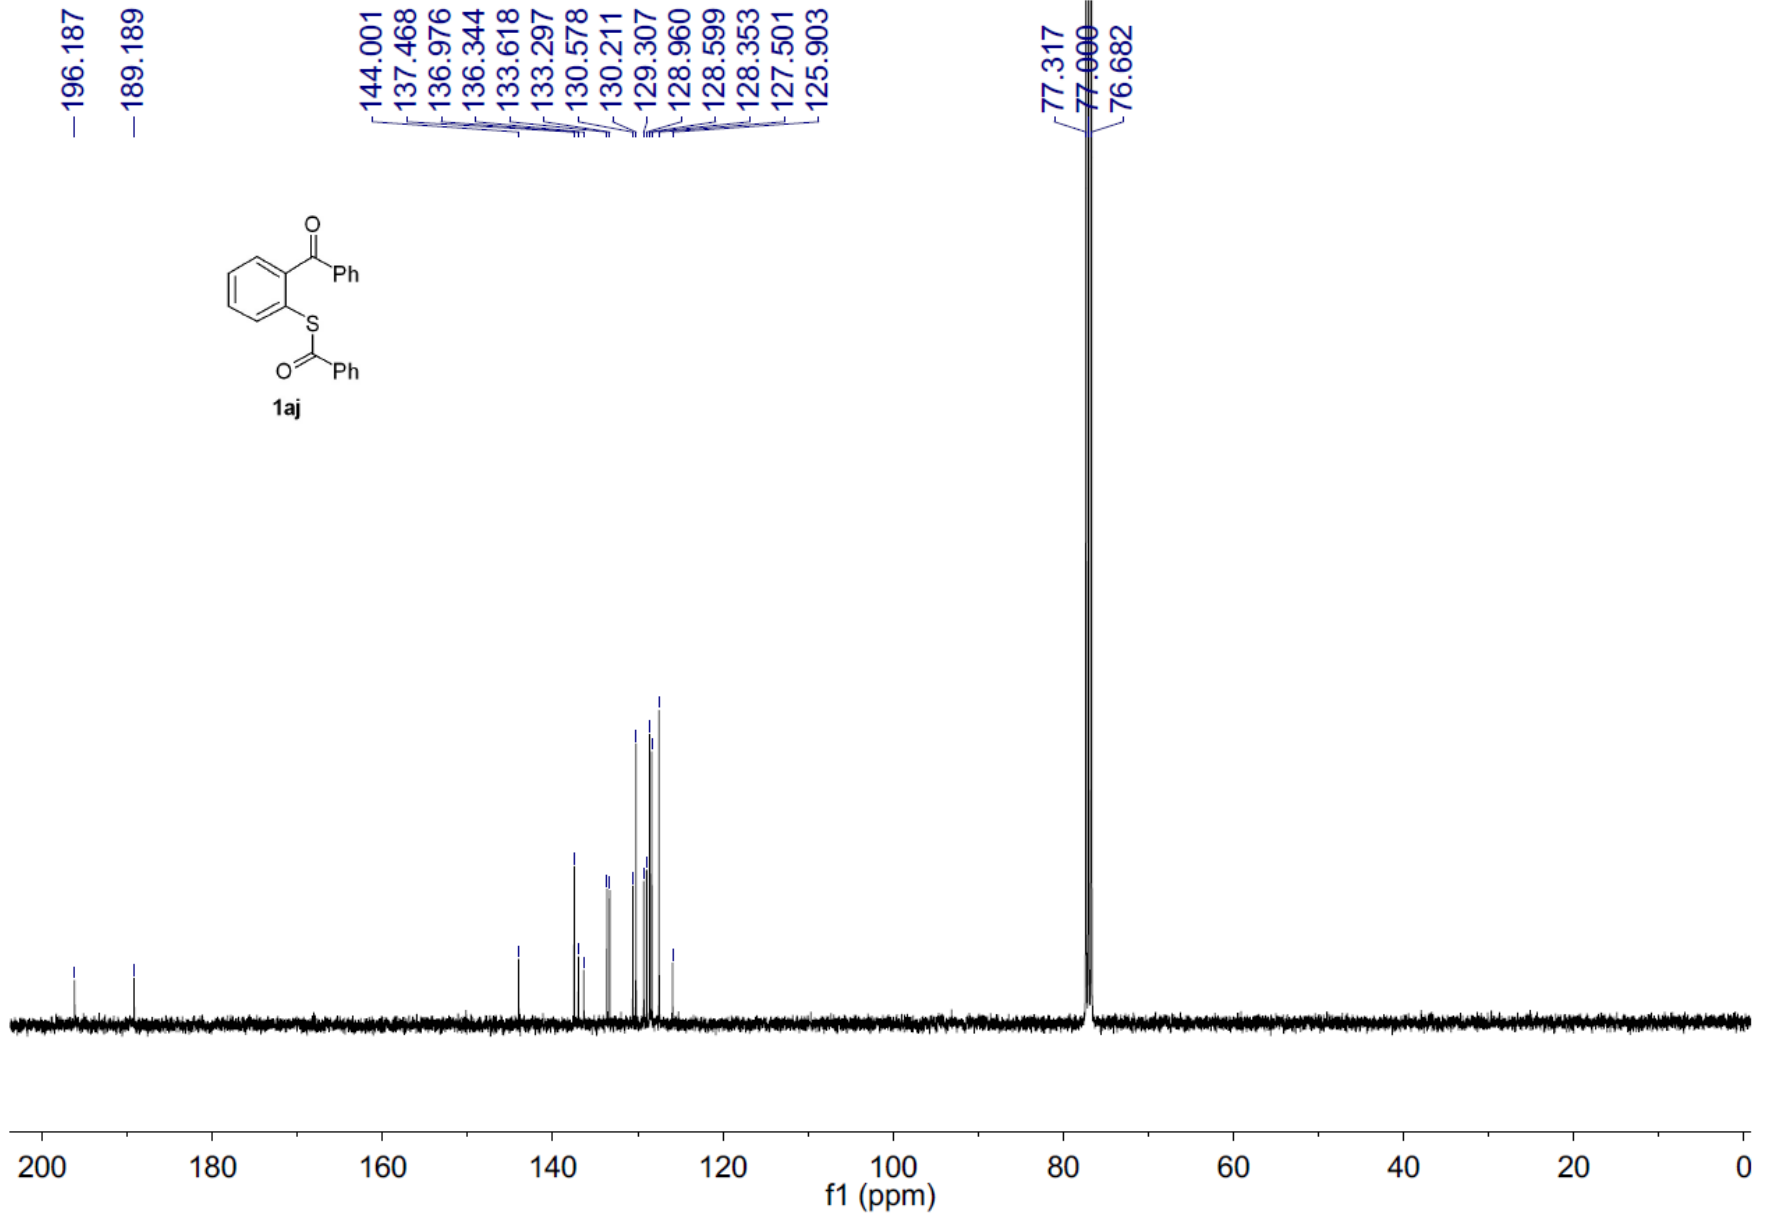

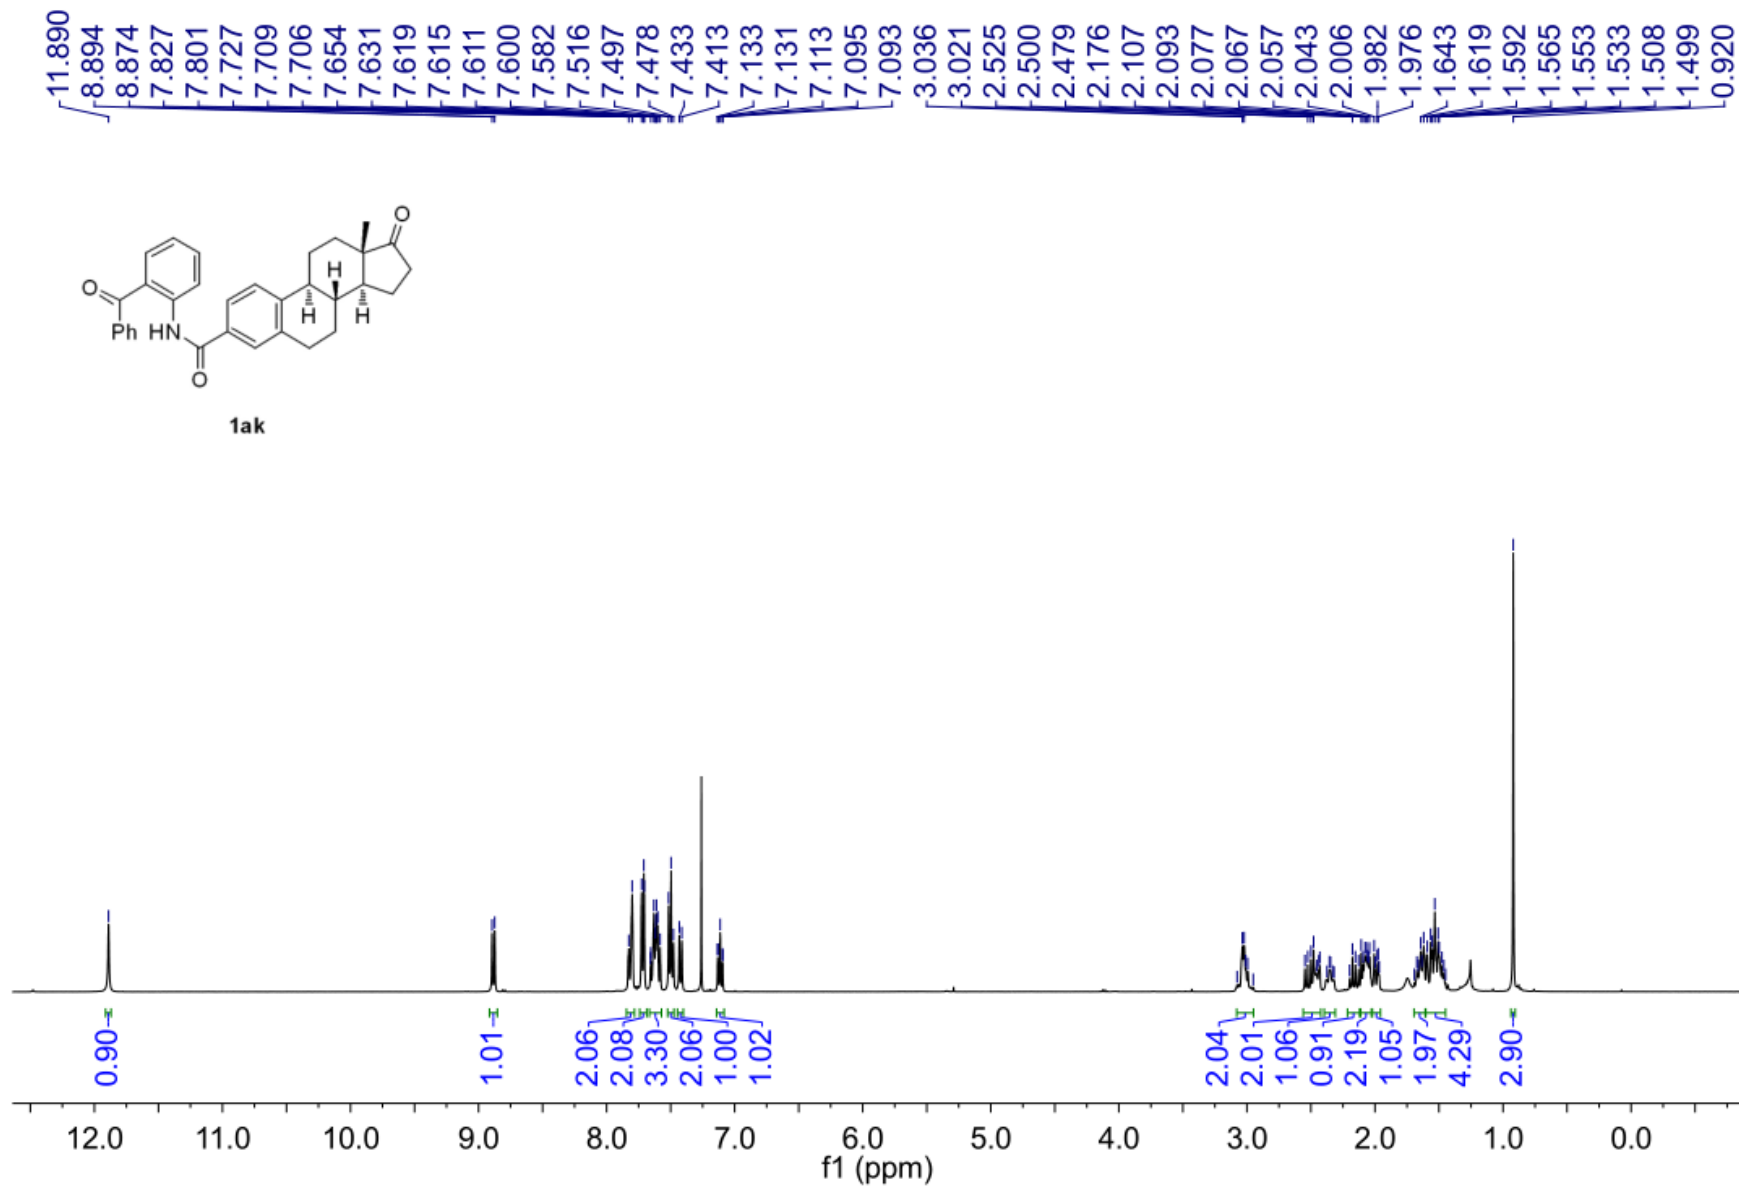

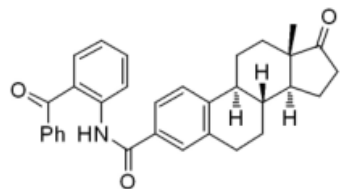

1ak

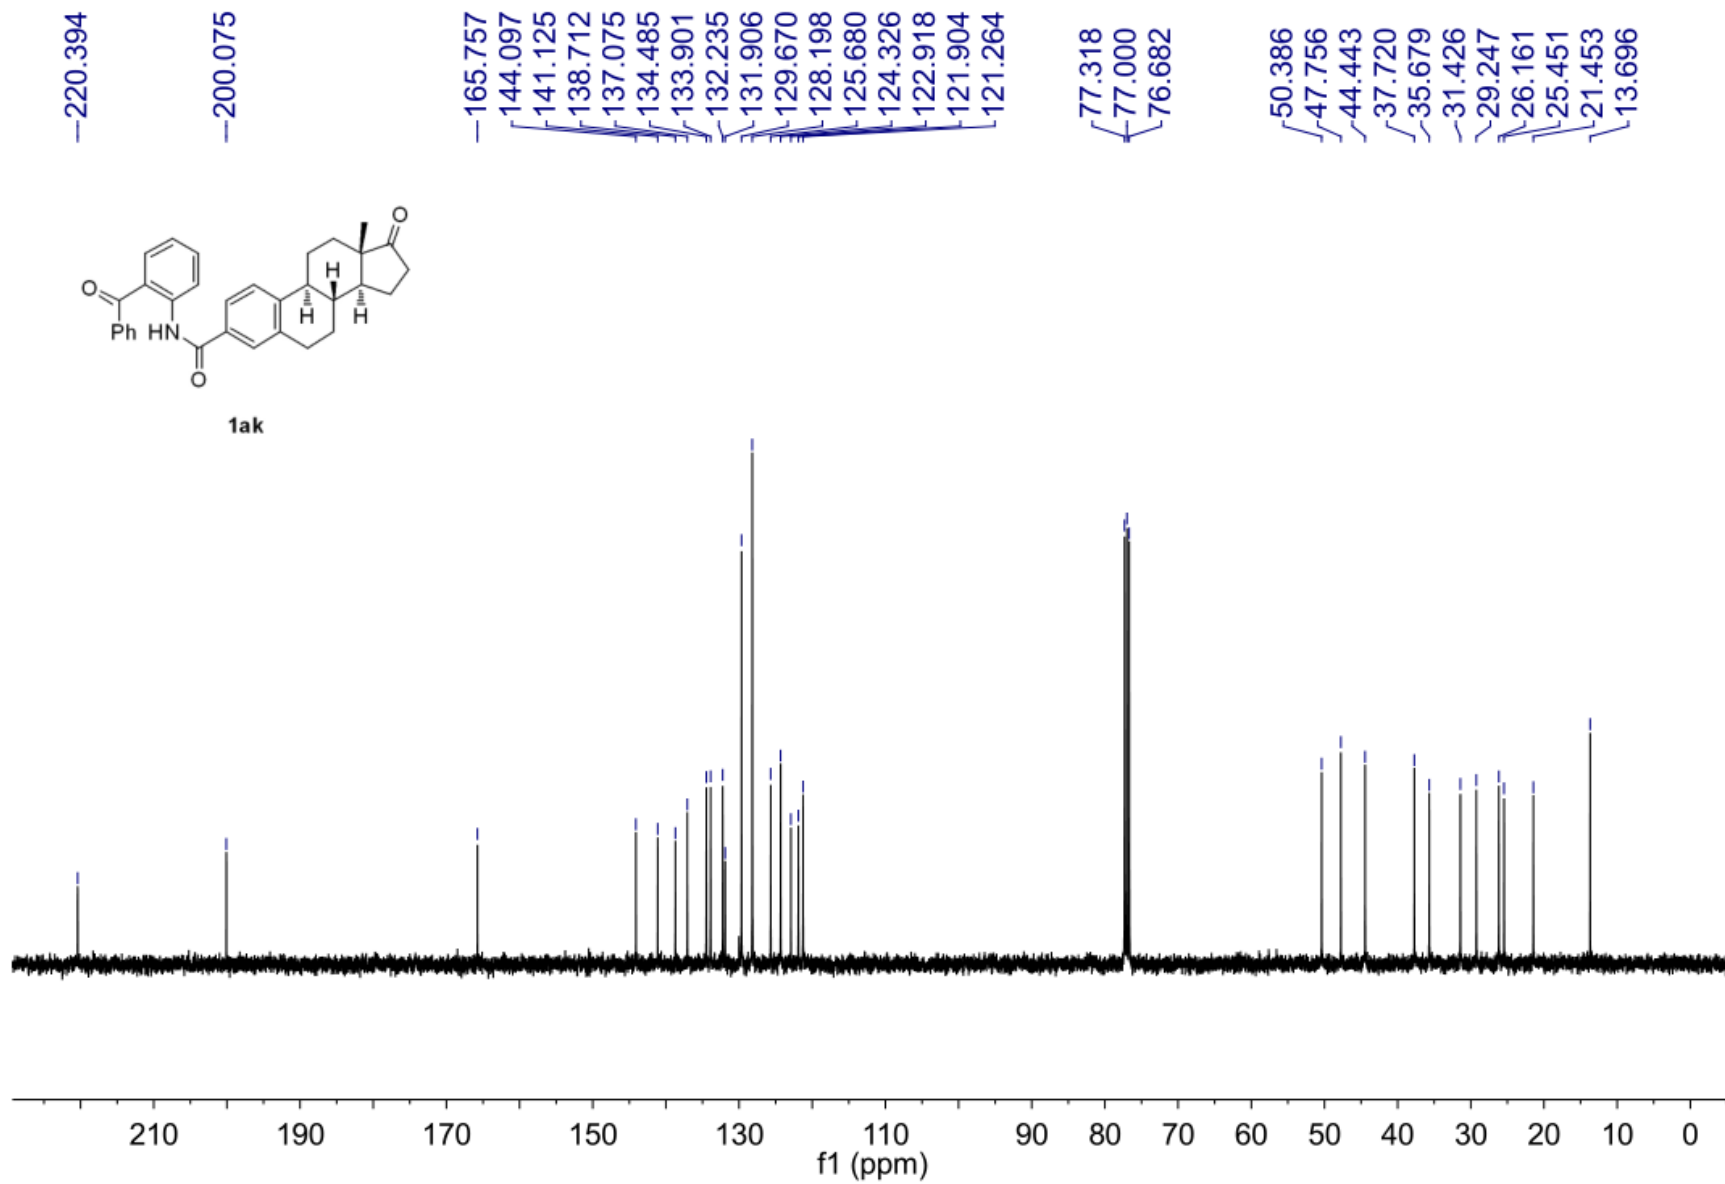

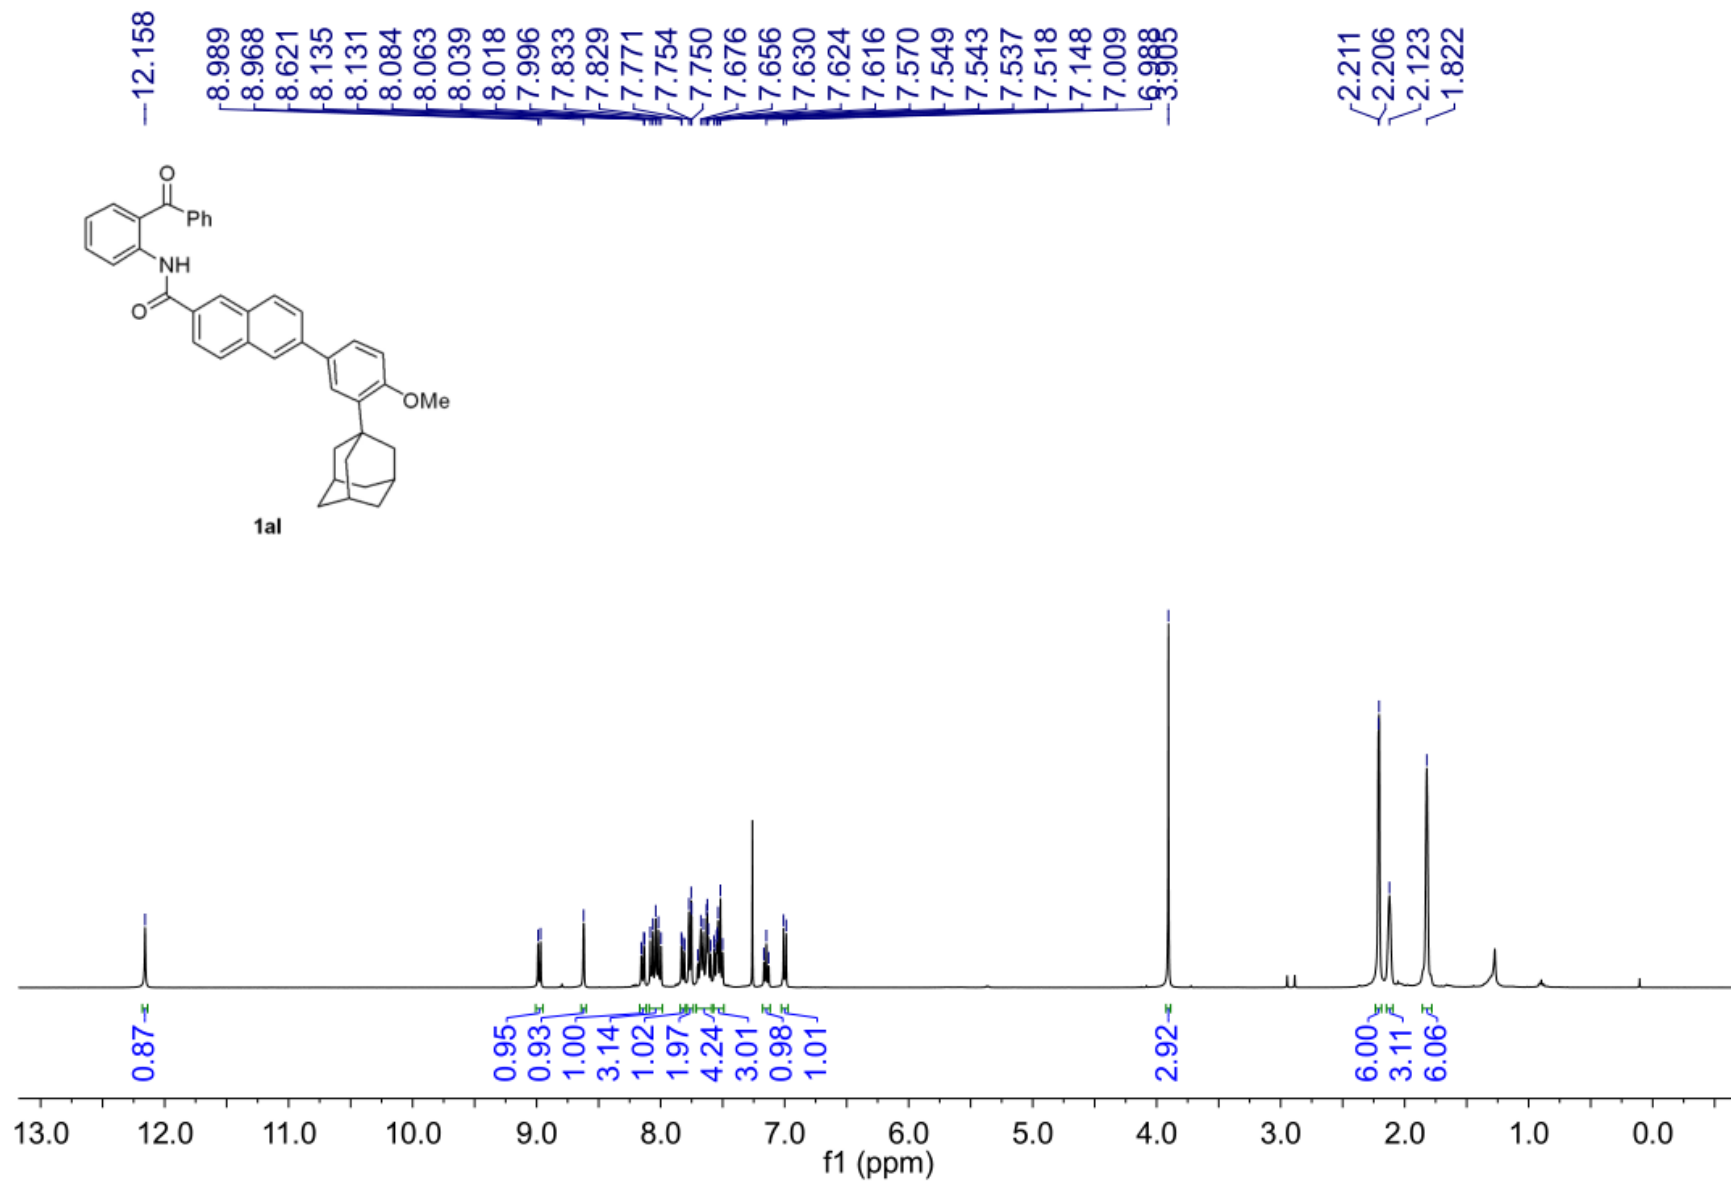

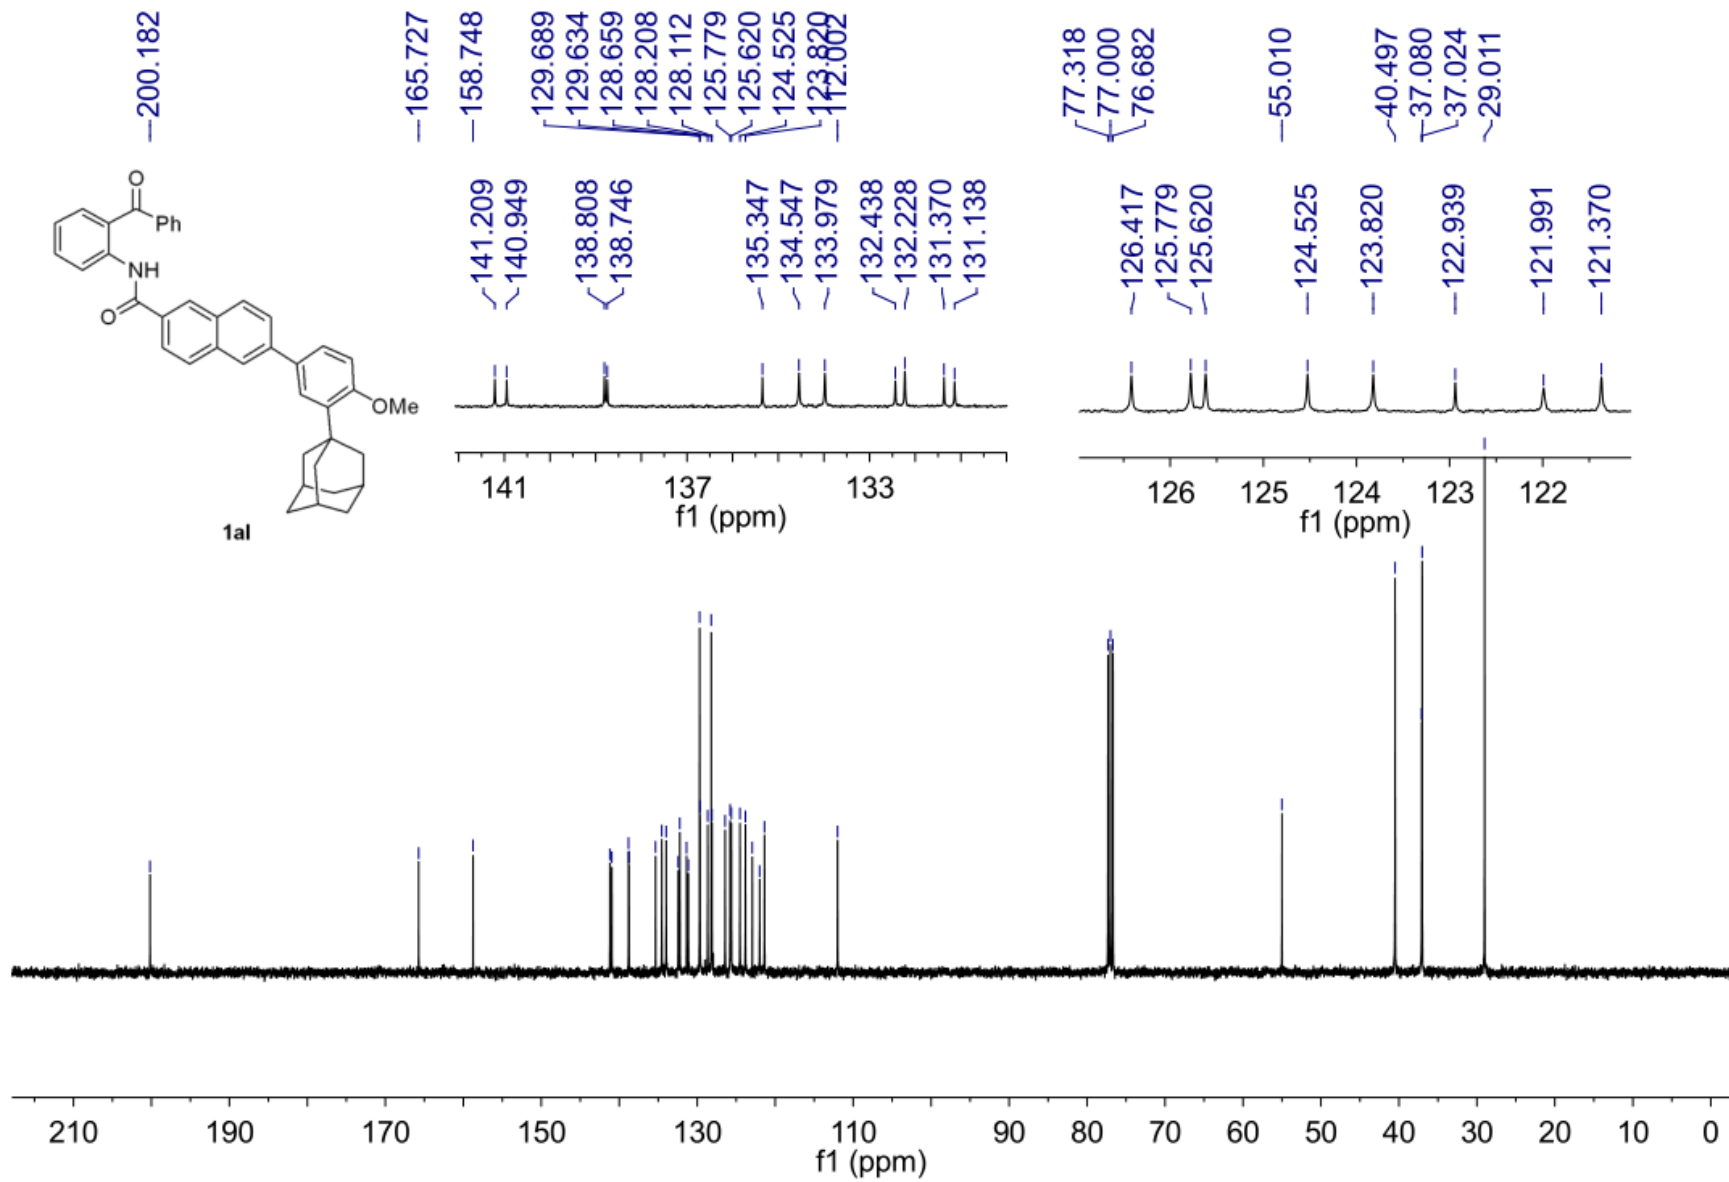

12.080  
 8.894  
 8.892  
 8.872  
 8.869  
 8.762  
 8.243  
 8.223  
 7.726  
 7.708  
 7.705  
 7.660  
 7.651  
 7.646  
 7.642  
 7.631  
 7.627  
 7.616  
 7.603  
 7.596  
 7.585  
 7.577  
 7.569  
 7.566  
 7.499  
 7.479  
 7.461  
 7.260  
 7.156  
 7.154  
 7.135  
 7.118  
 7.116  
 4.984  
 4.973  
 1.744  
 1.714  
 1.599  
 1.571  
 1.163  
 1.141  
 1.135  
 1.105  
 0.935  
 0.919  
 0.904  
 0.886  
 0.806  
 0.788

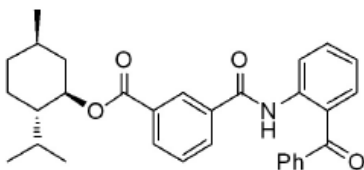

1am

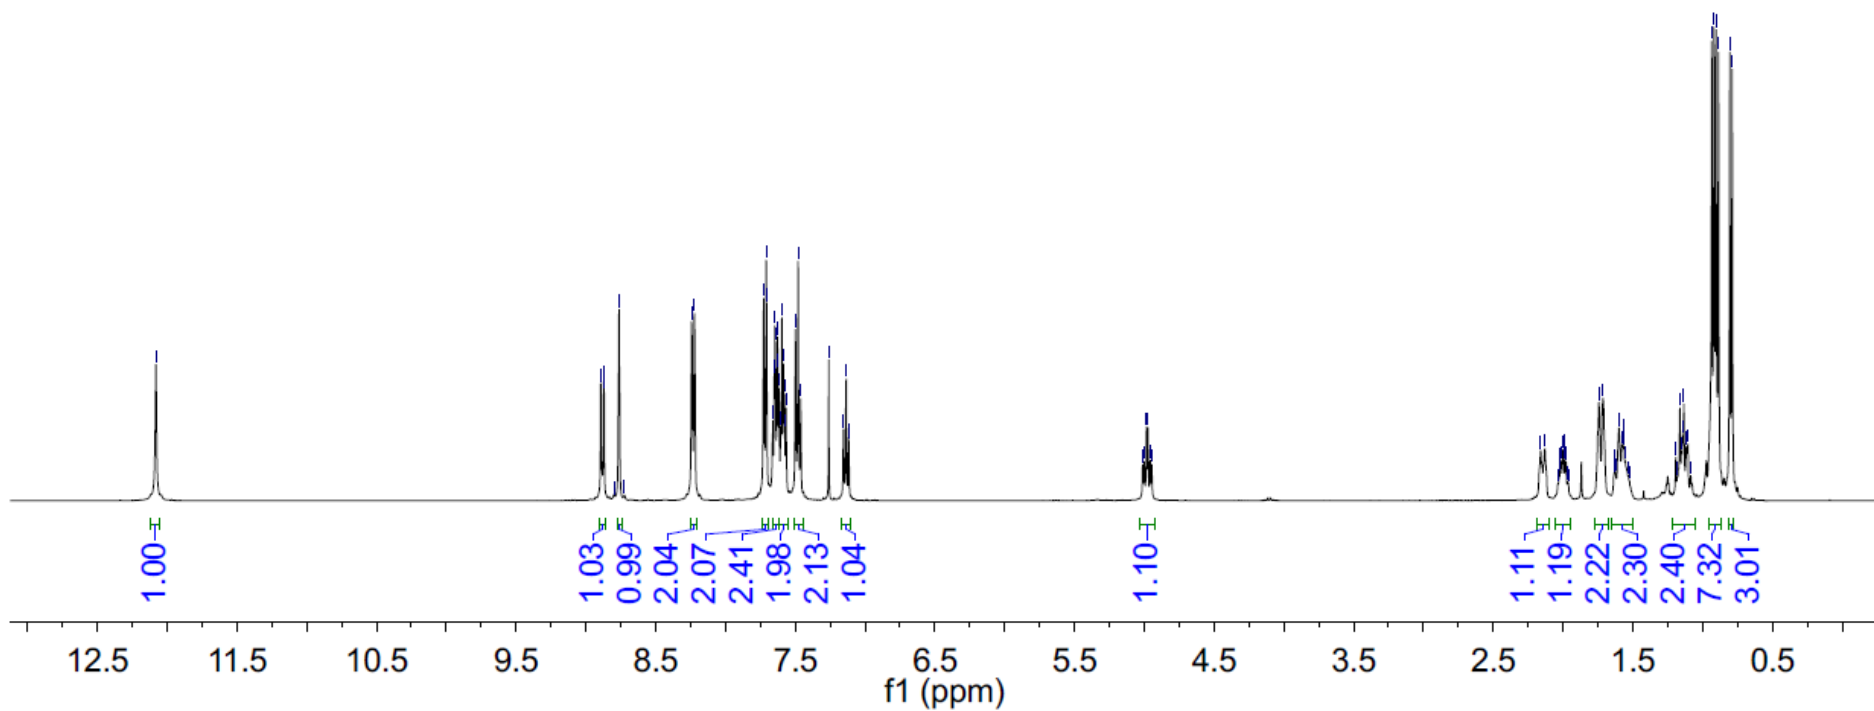

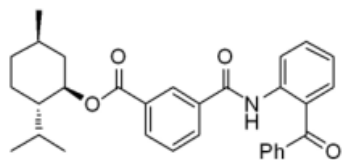

1am

200.053

165.141  
164.839  
140.812  
138.560  
134.862  
134.518  
133.941  
132.841  
132.337  
131.571  
131.088  
129.768  
128.861  
128.666  
128.192  
123.050  
122.300  
121.321

77.318  
77.000  
76.681  
75.218

47.023  
40.794  
34.187  
31.352  
26.311  
23.422  
21.945  
20.694  
16.333

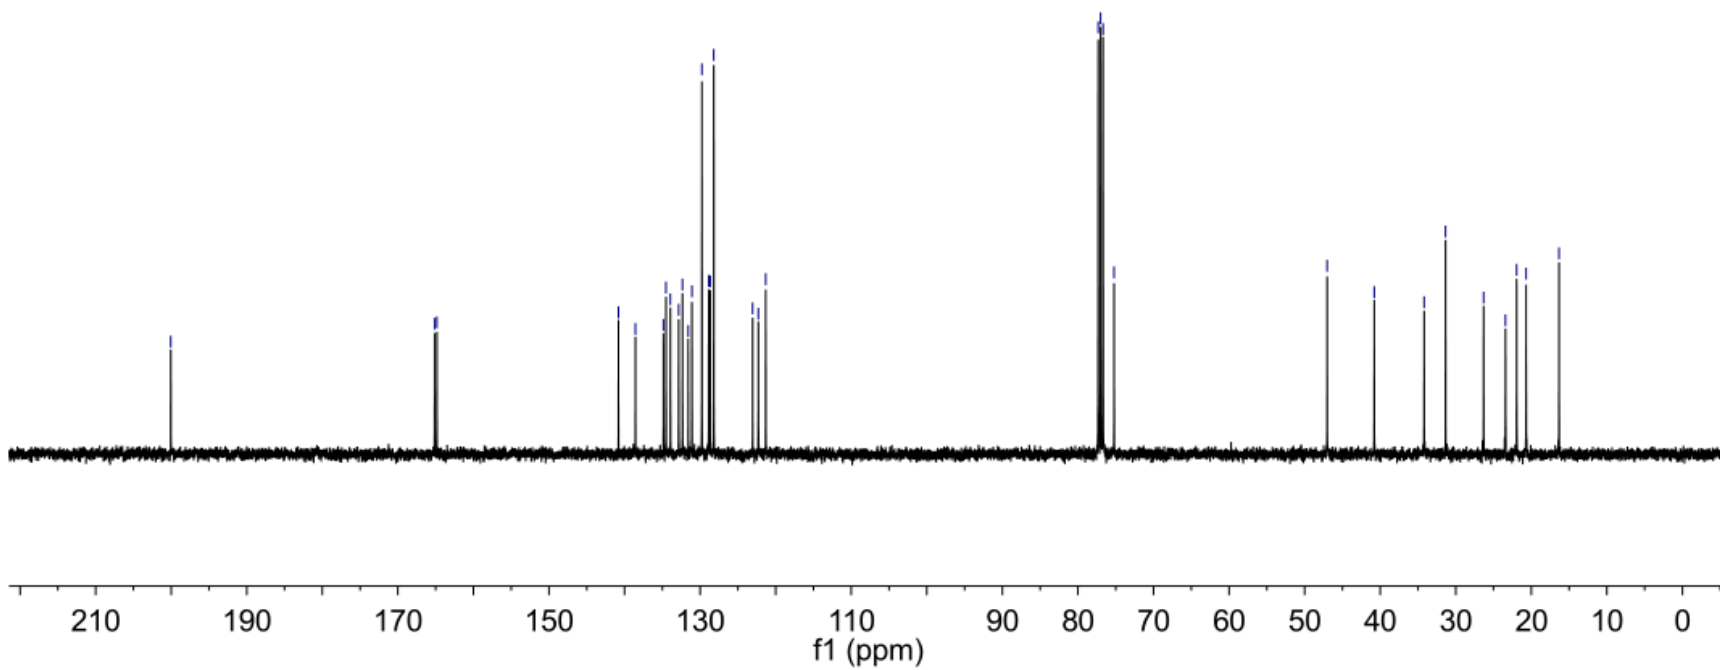



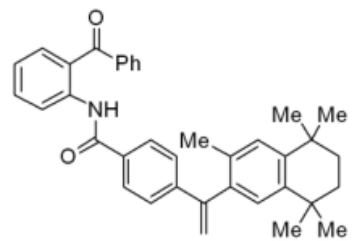

1an

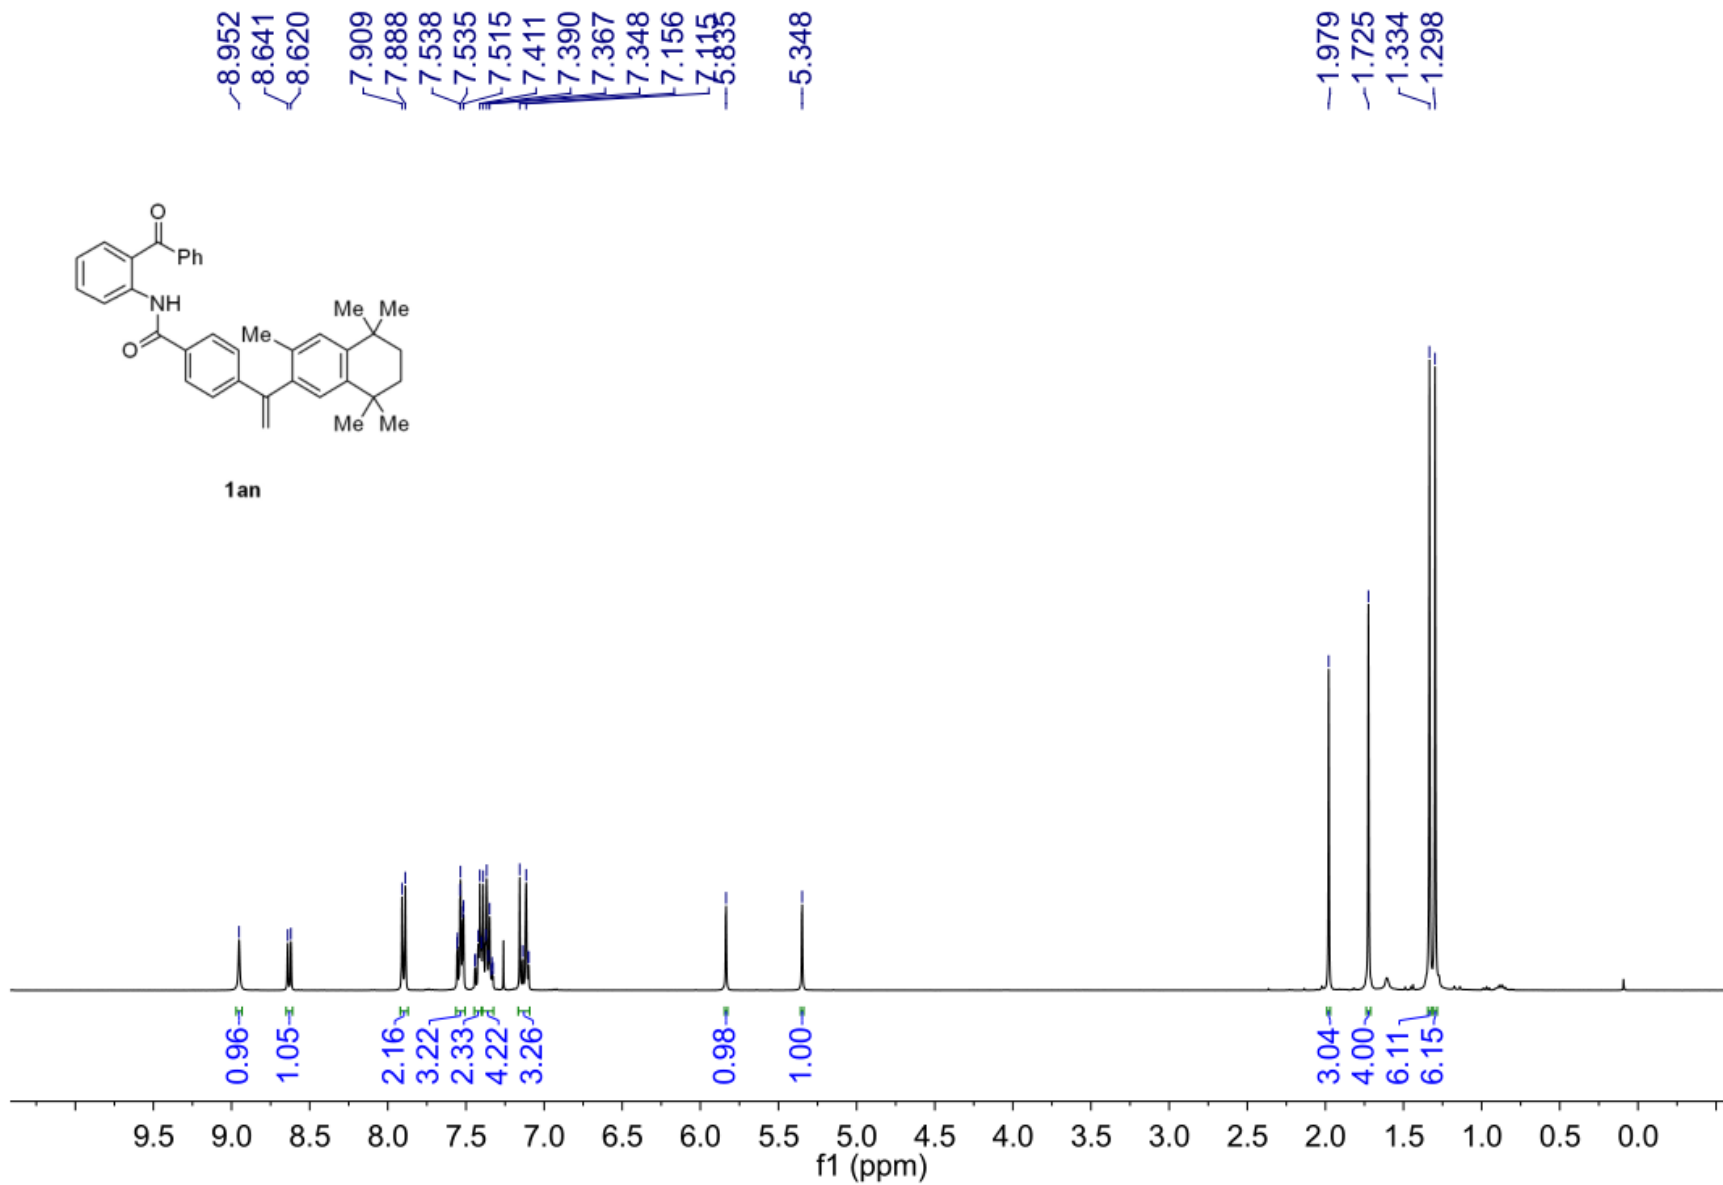

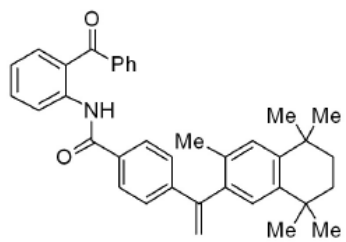

1an

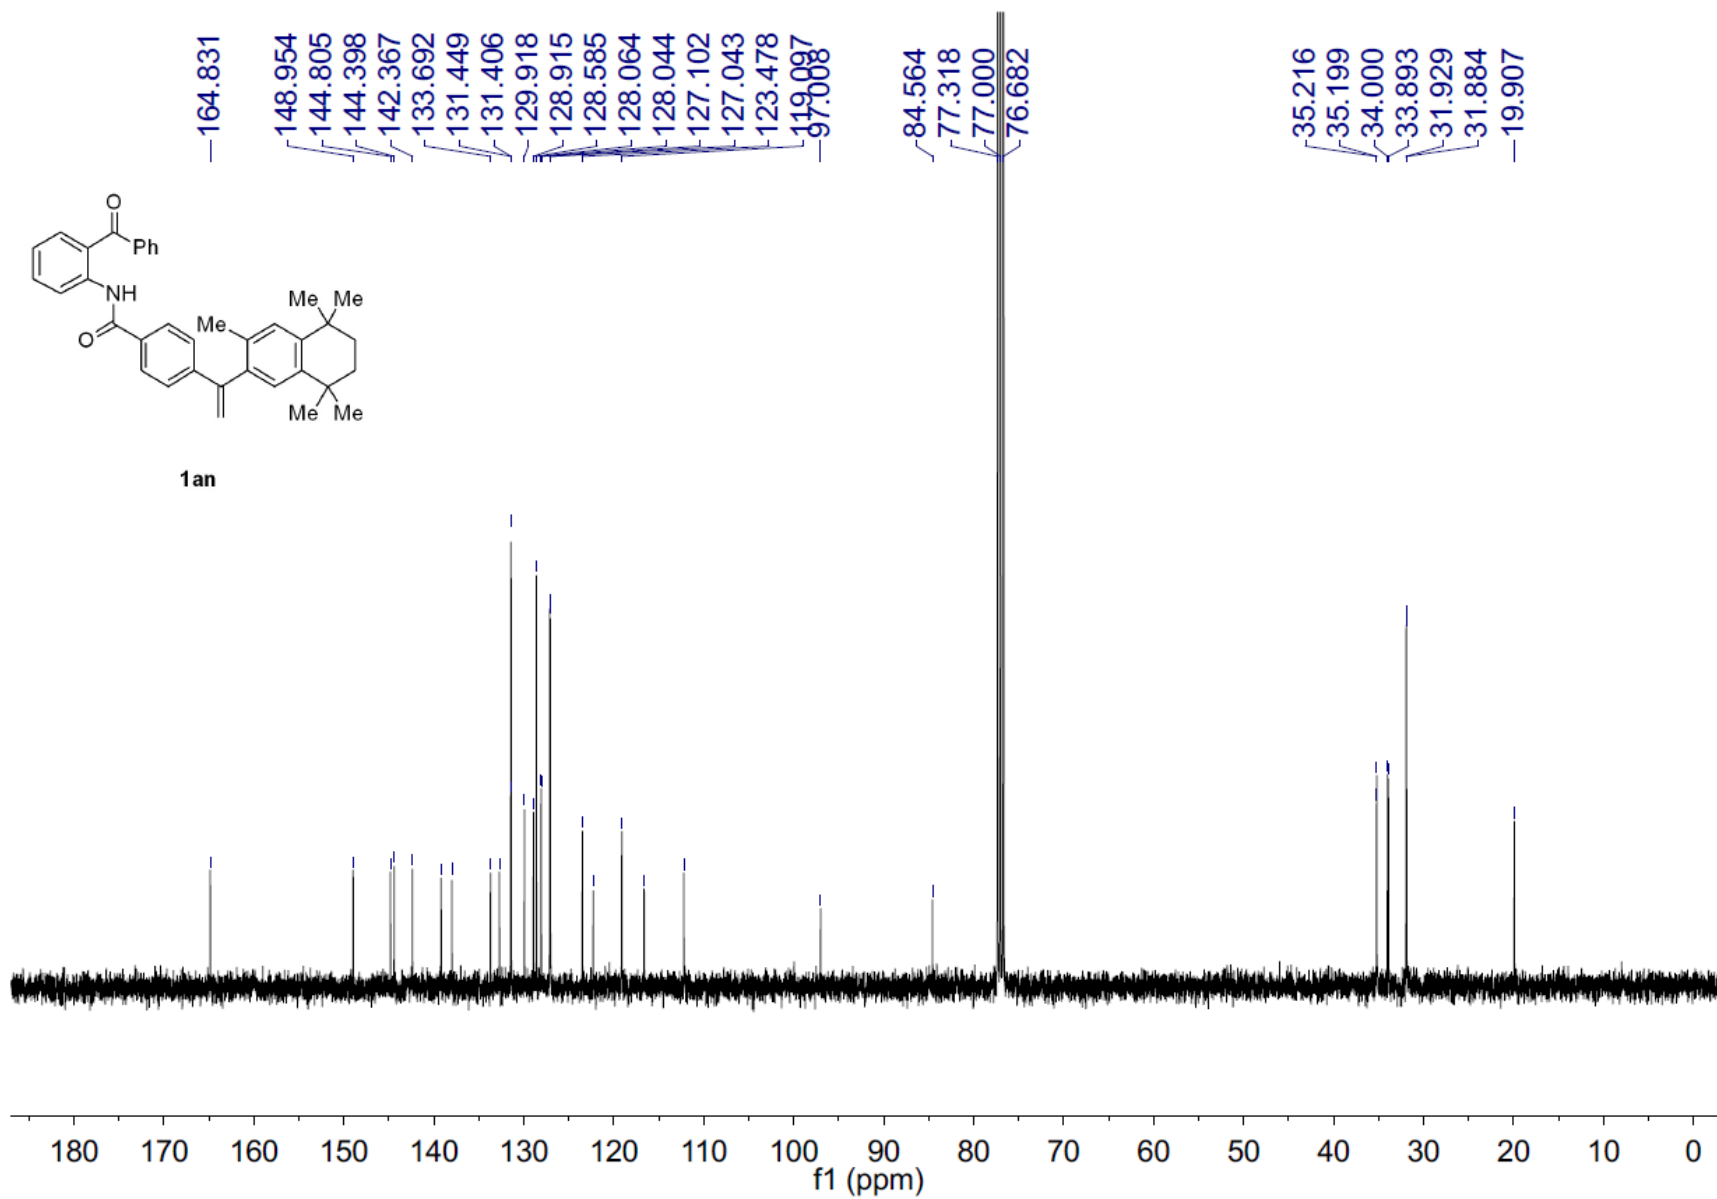

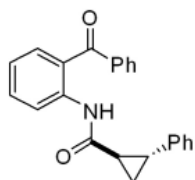

1ao

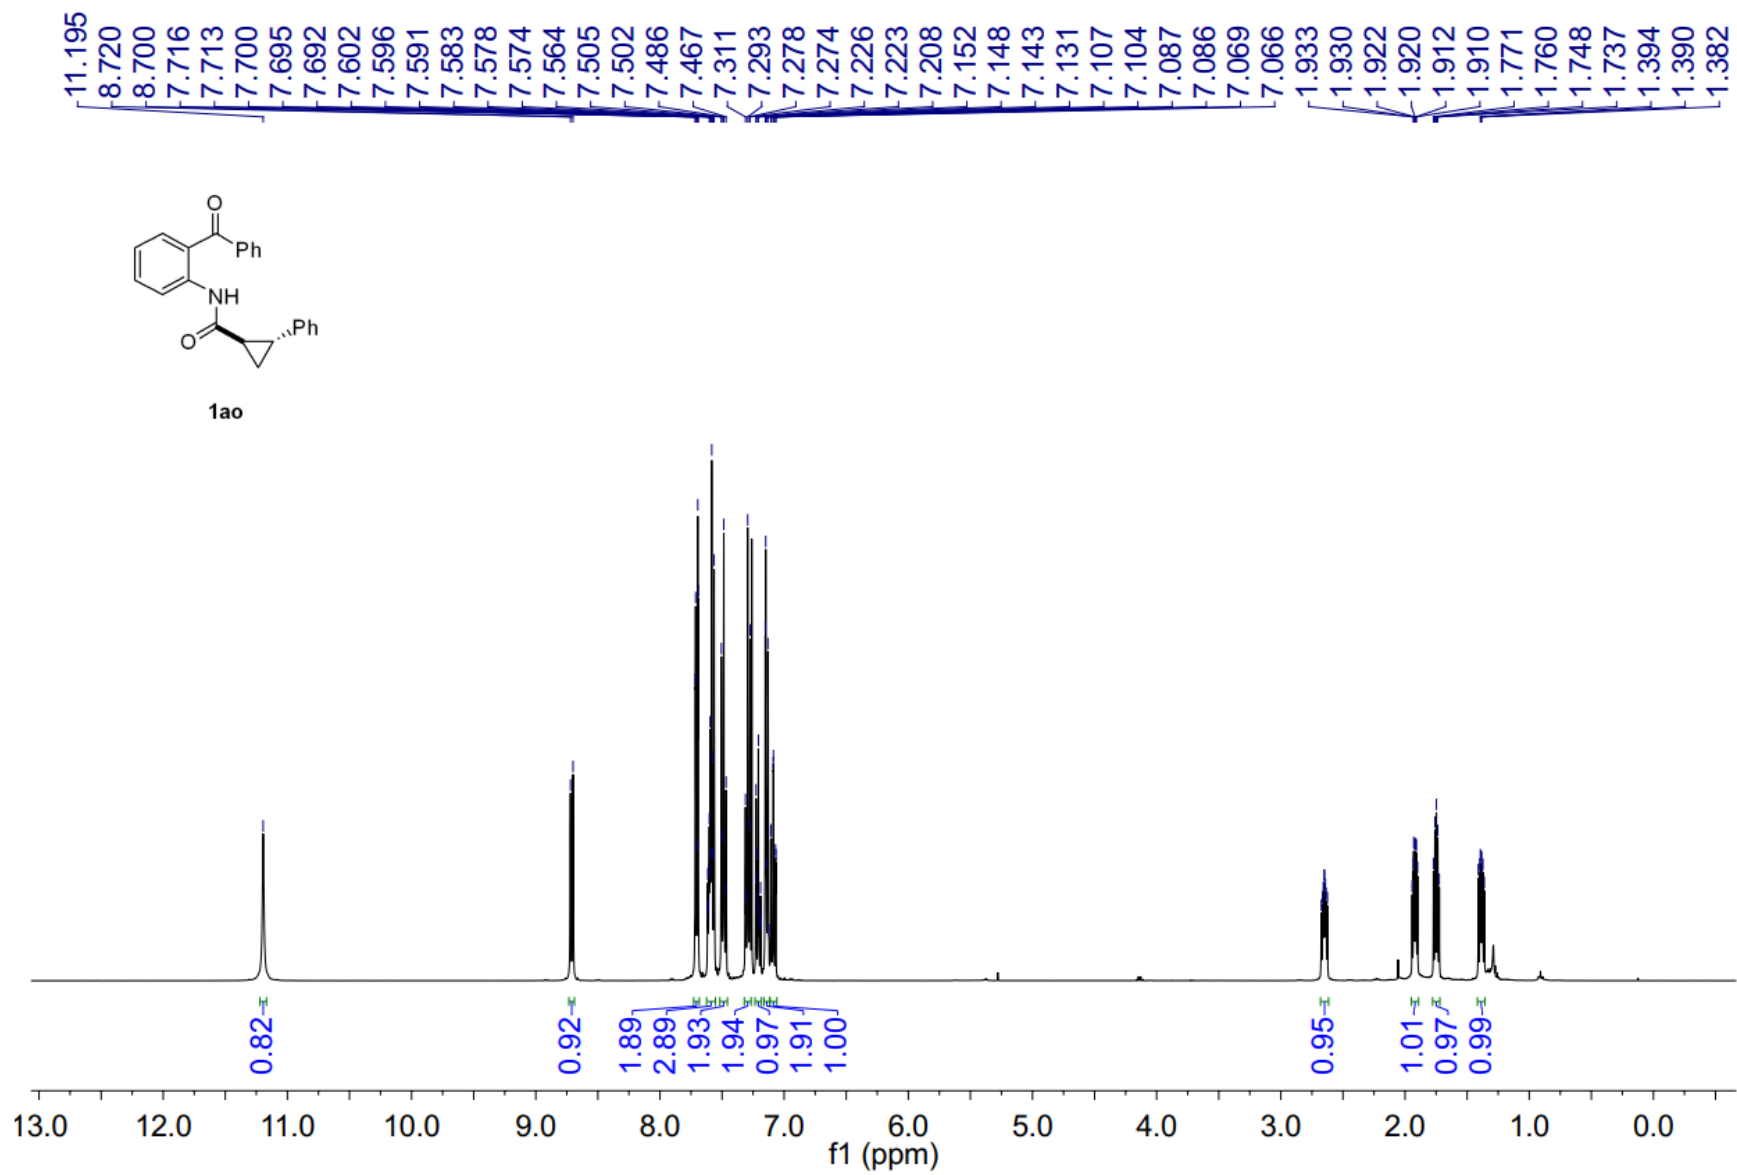

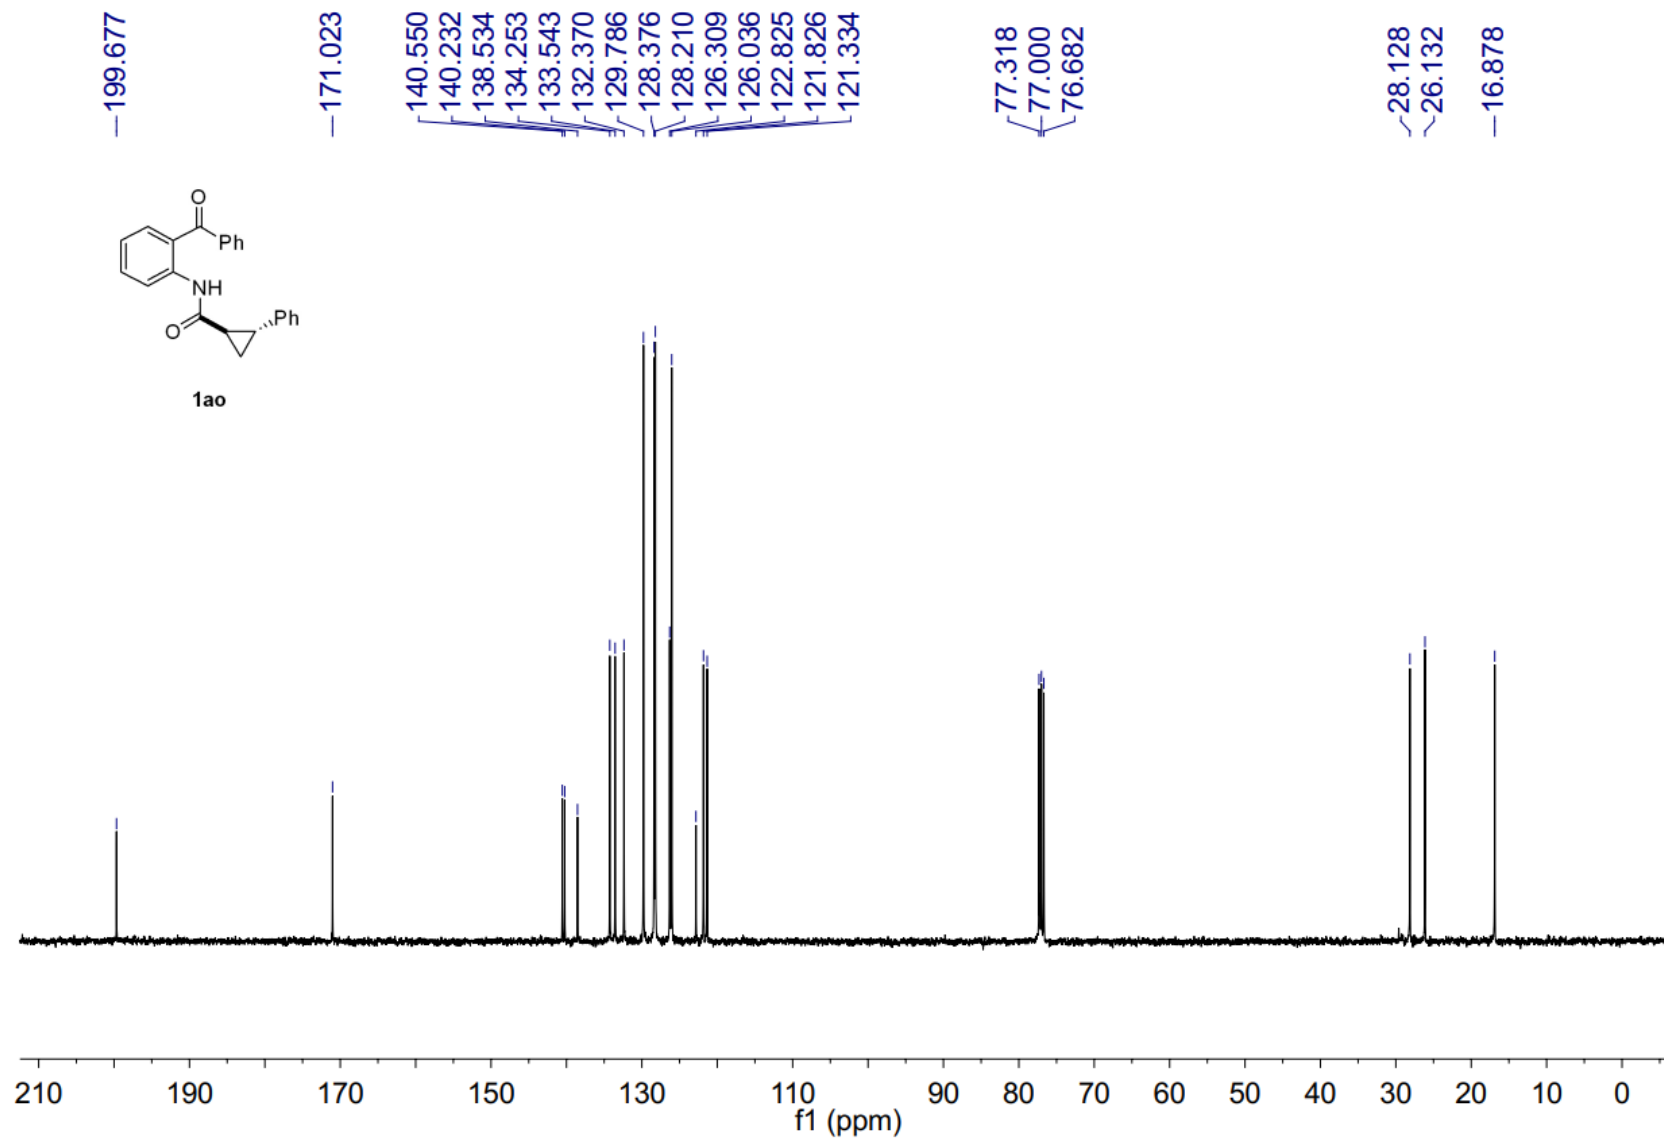

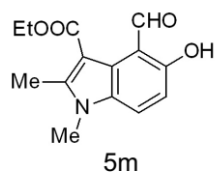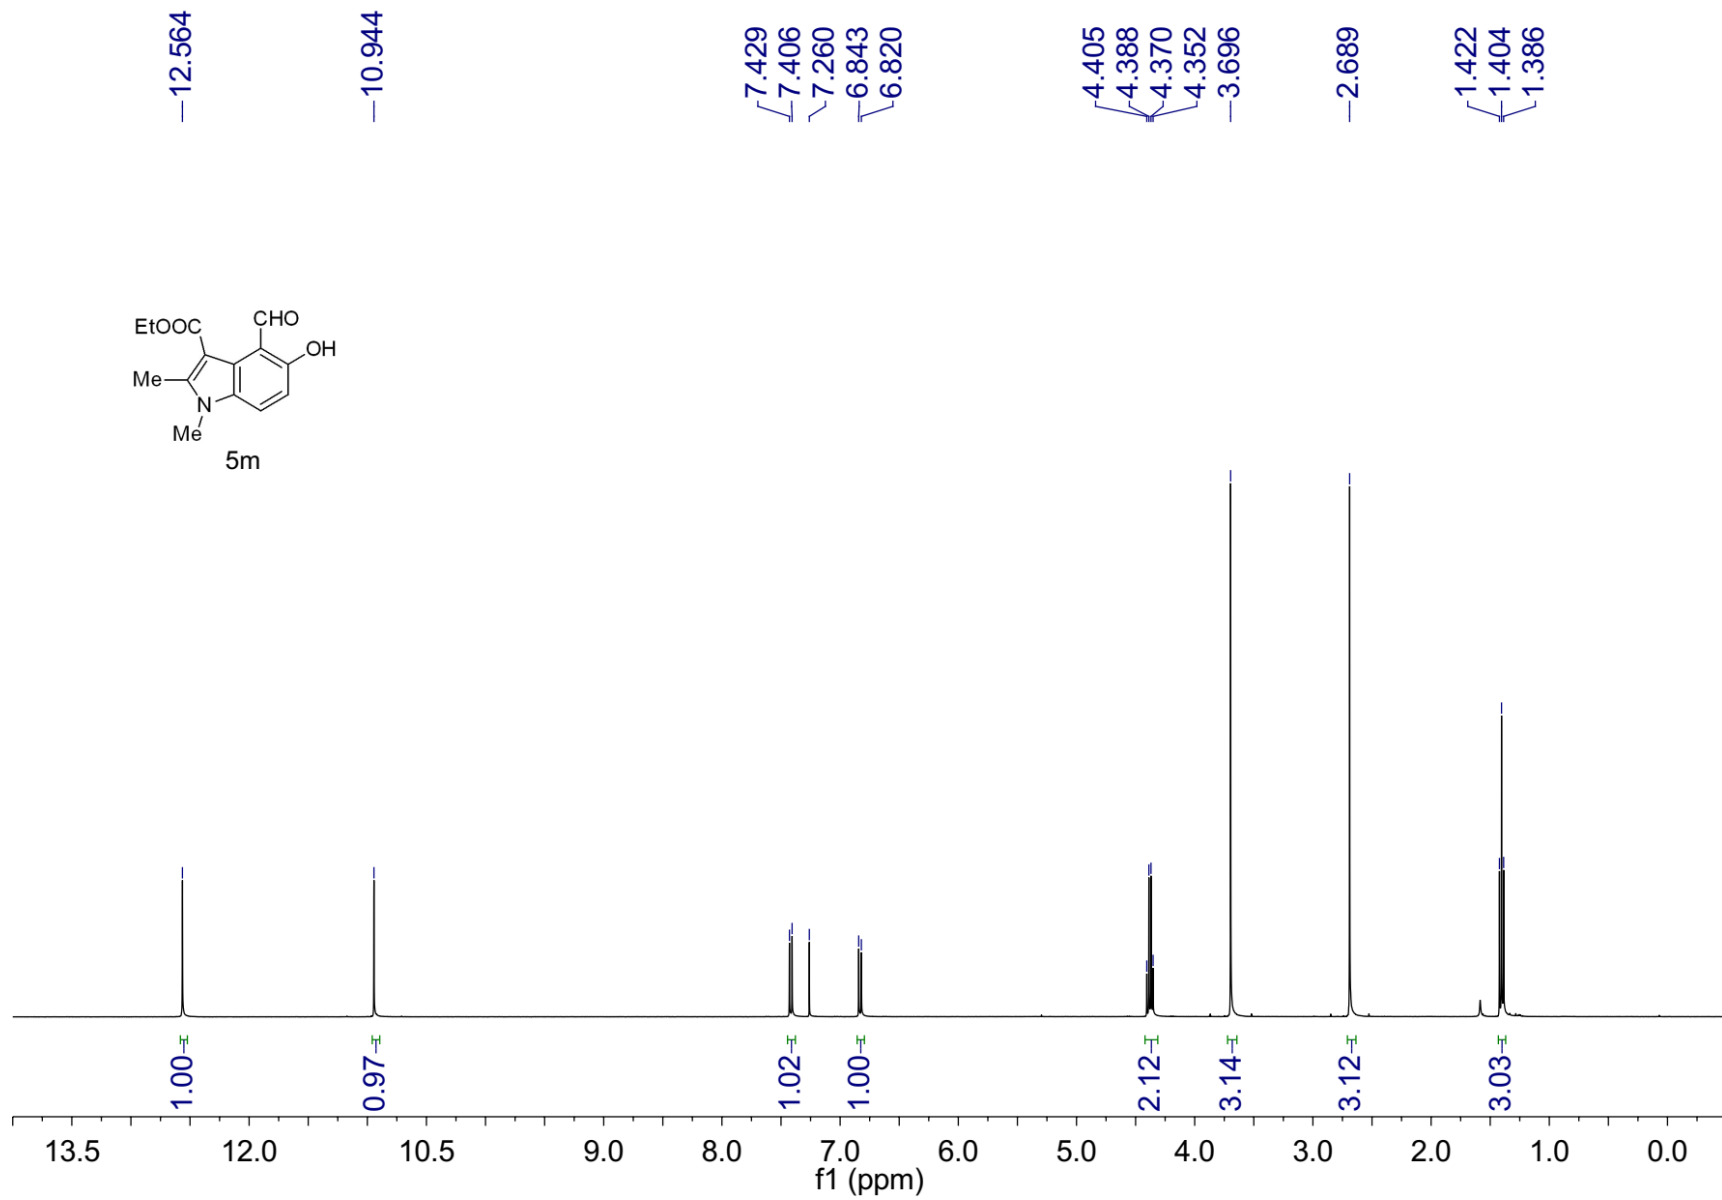

—198.304

—166.155

—160.573

—145.670

~130.577

~125.537

~118.340

~112.460

~111.413

~105.044

~77.318

~77.000

~76.682

—60.143

—29.880

~14.303

~12.714

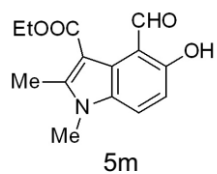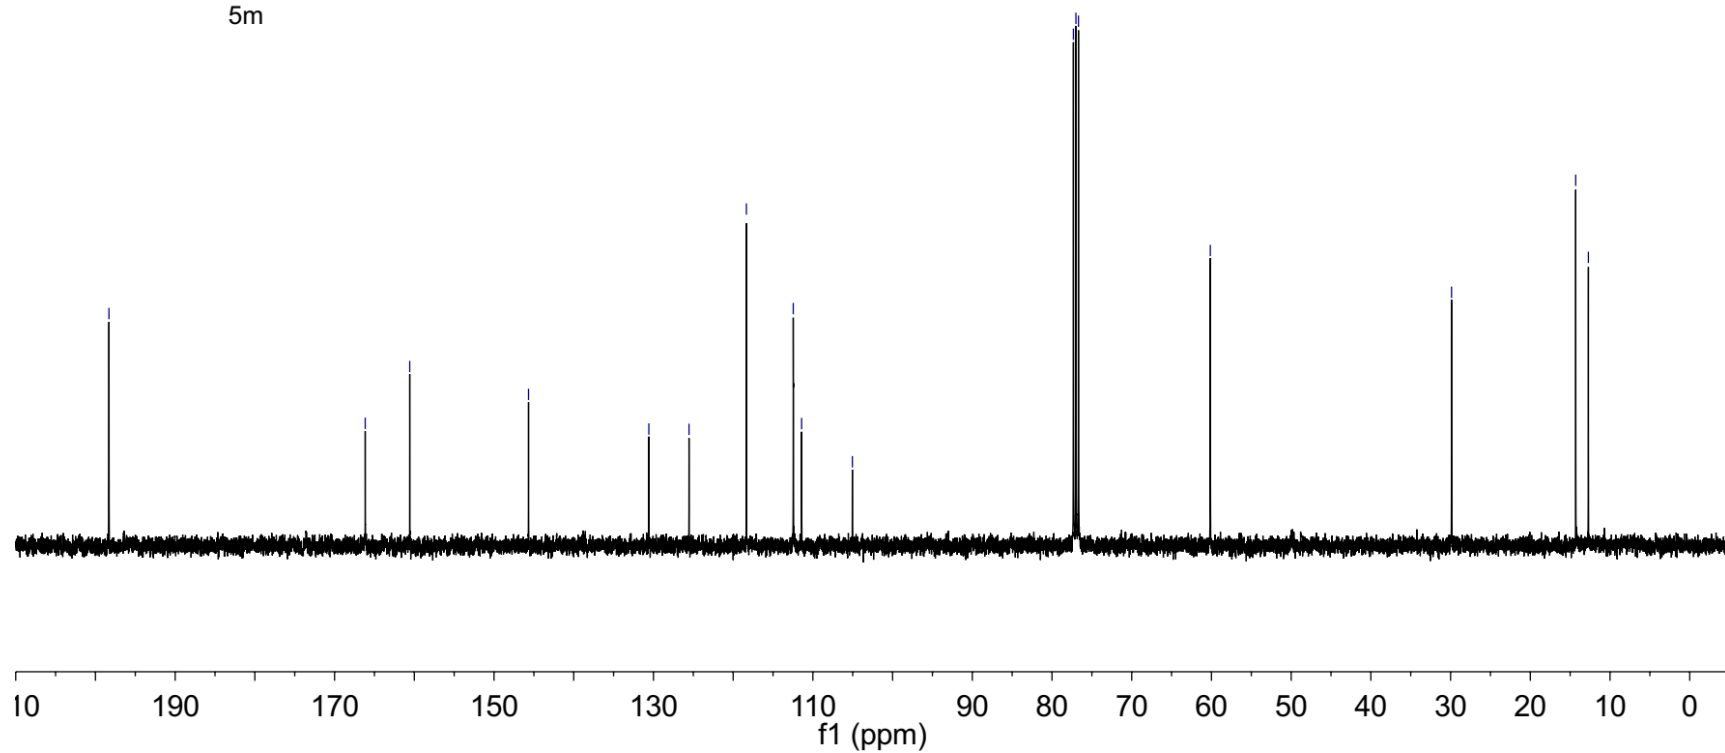

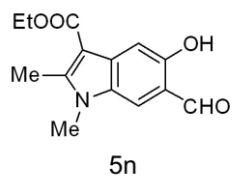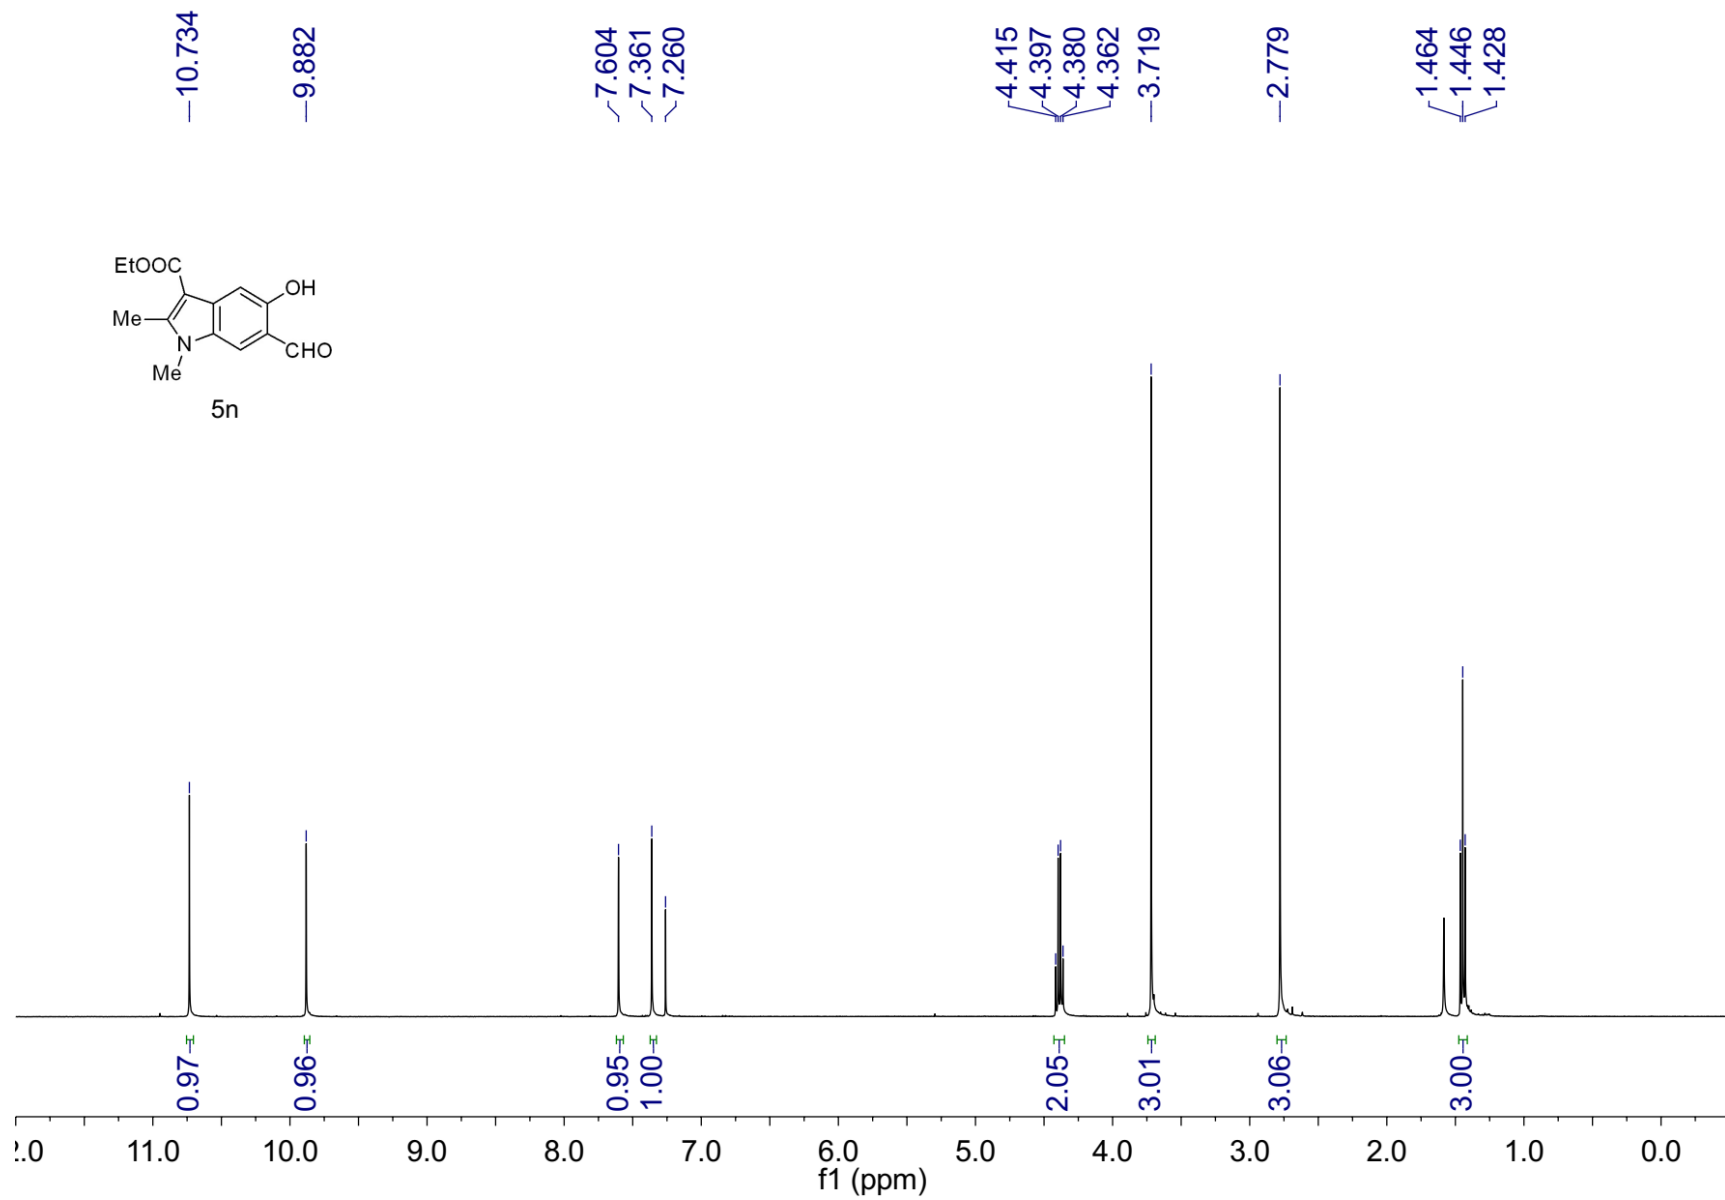

—195.174  
—165.141  
—156.257  
—151.314  
~133.634  
~130.980  
~116.372  
~114.405  
~107.000  
~104.146  
77.318  
77.000  
76.682  
—59.611  
—29.716  
~14.515  
~12.173

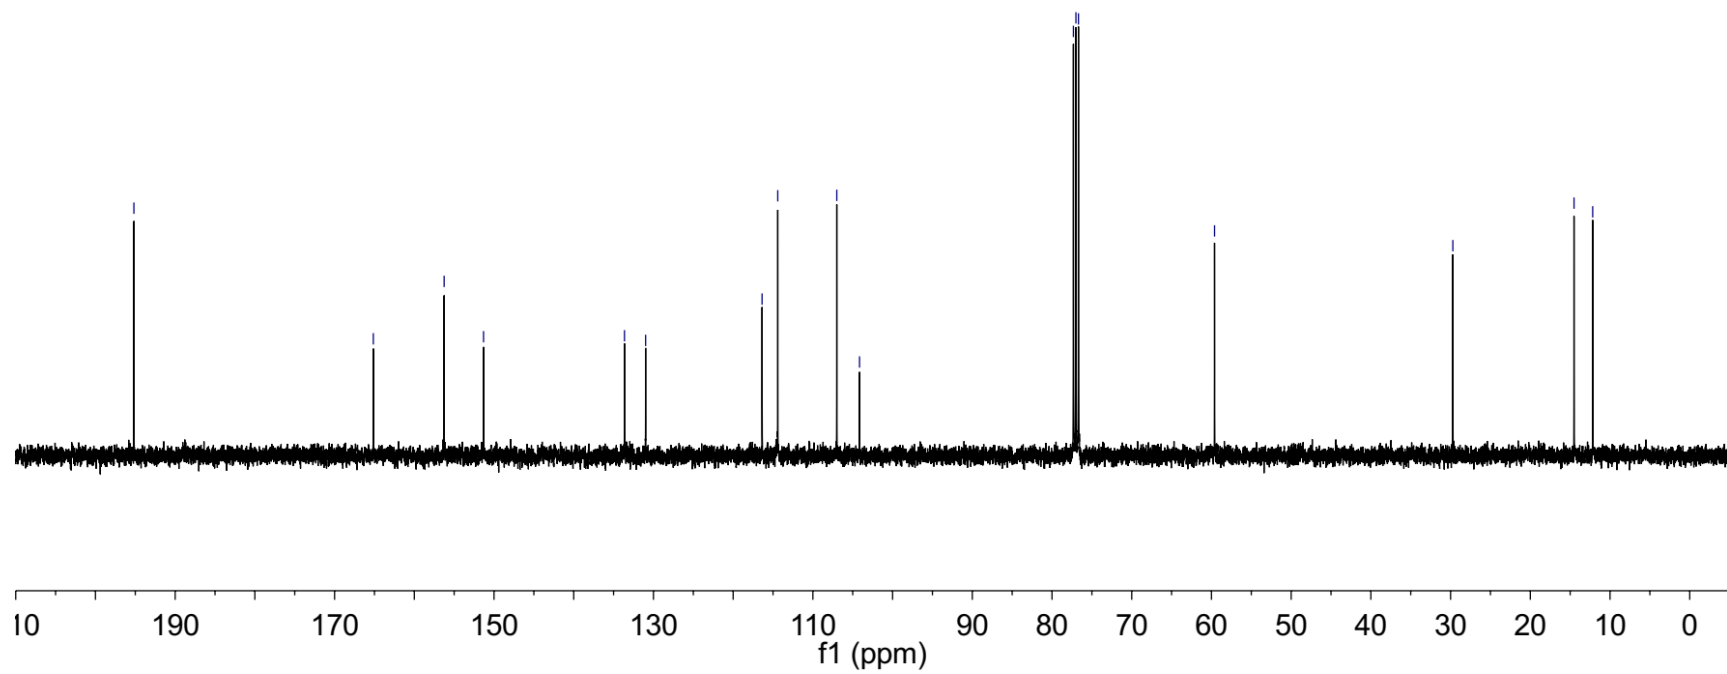



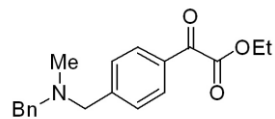

S6

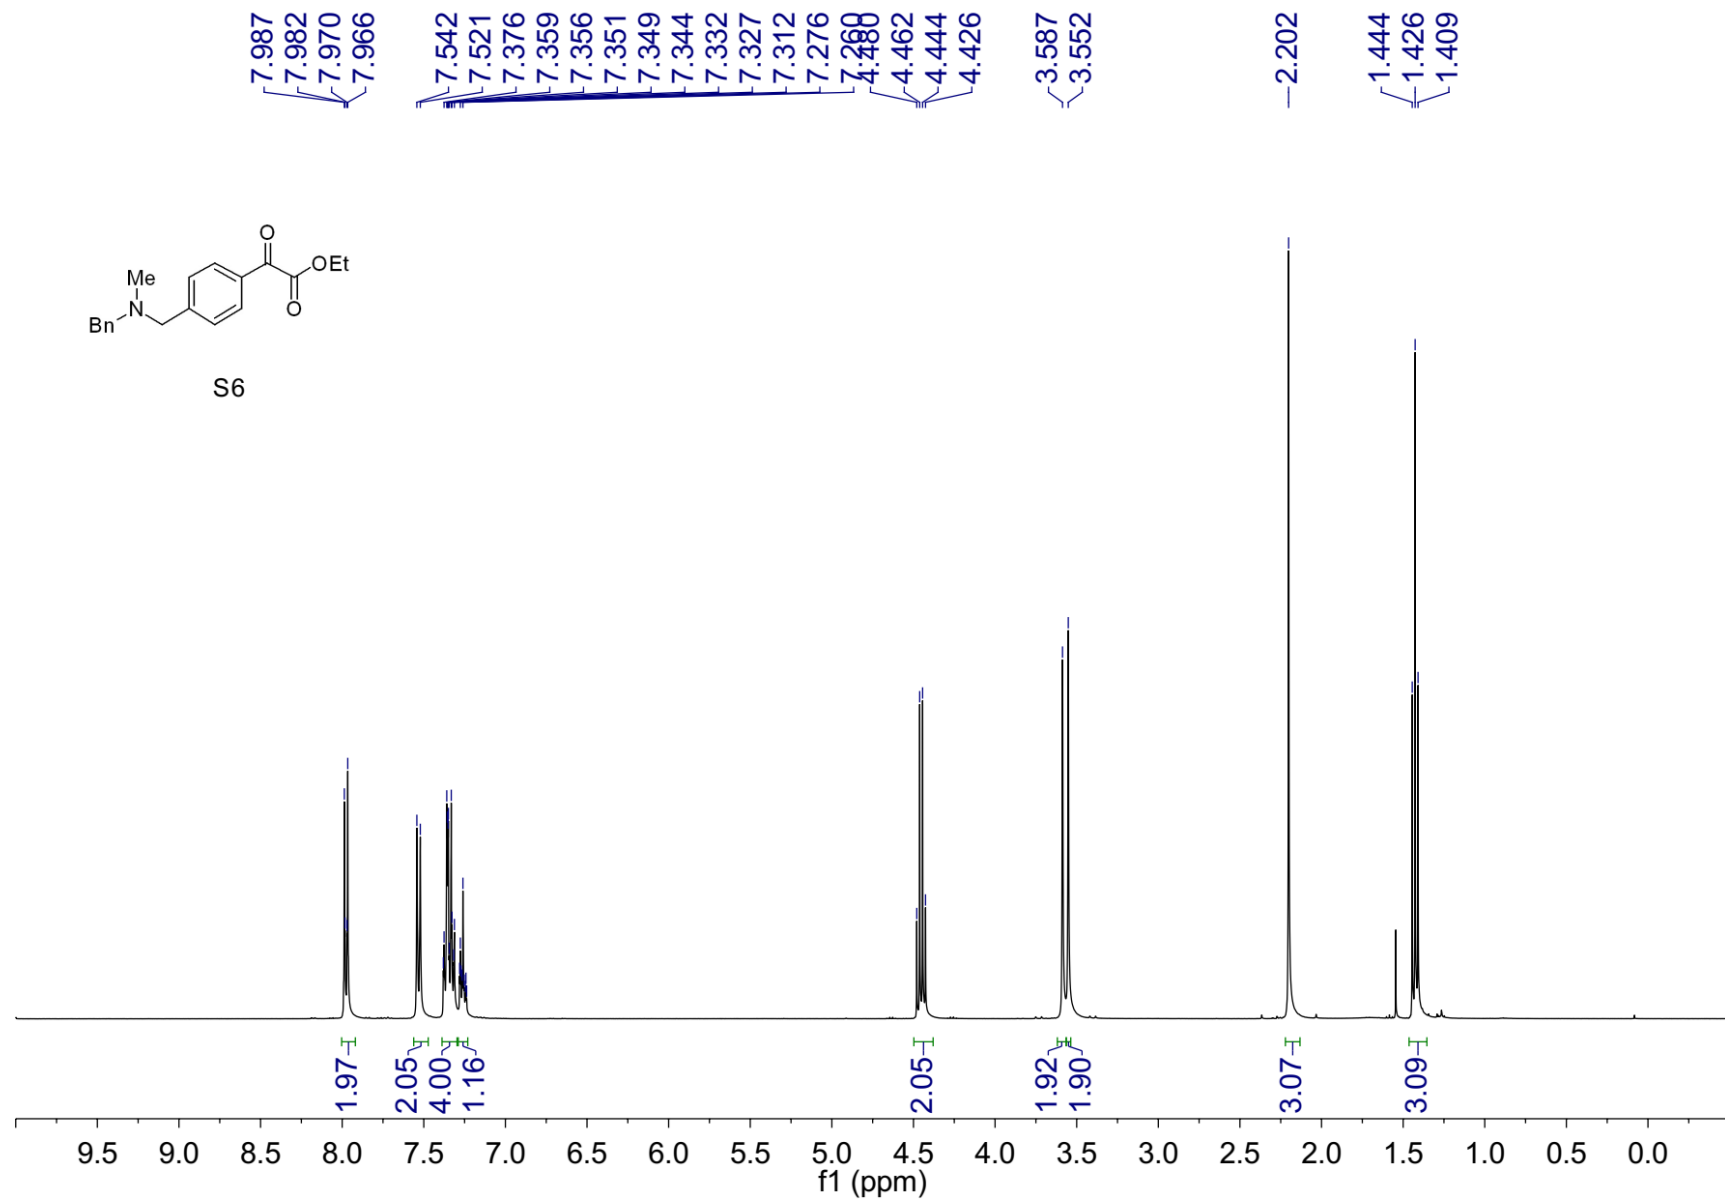

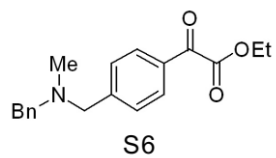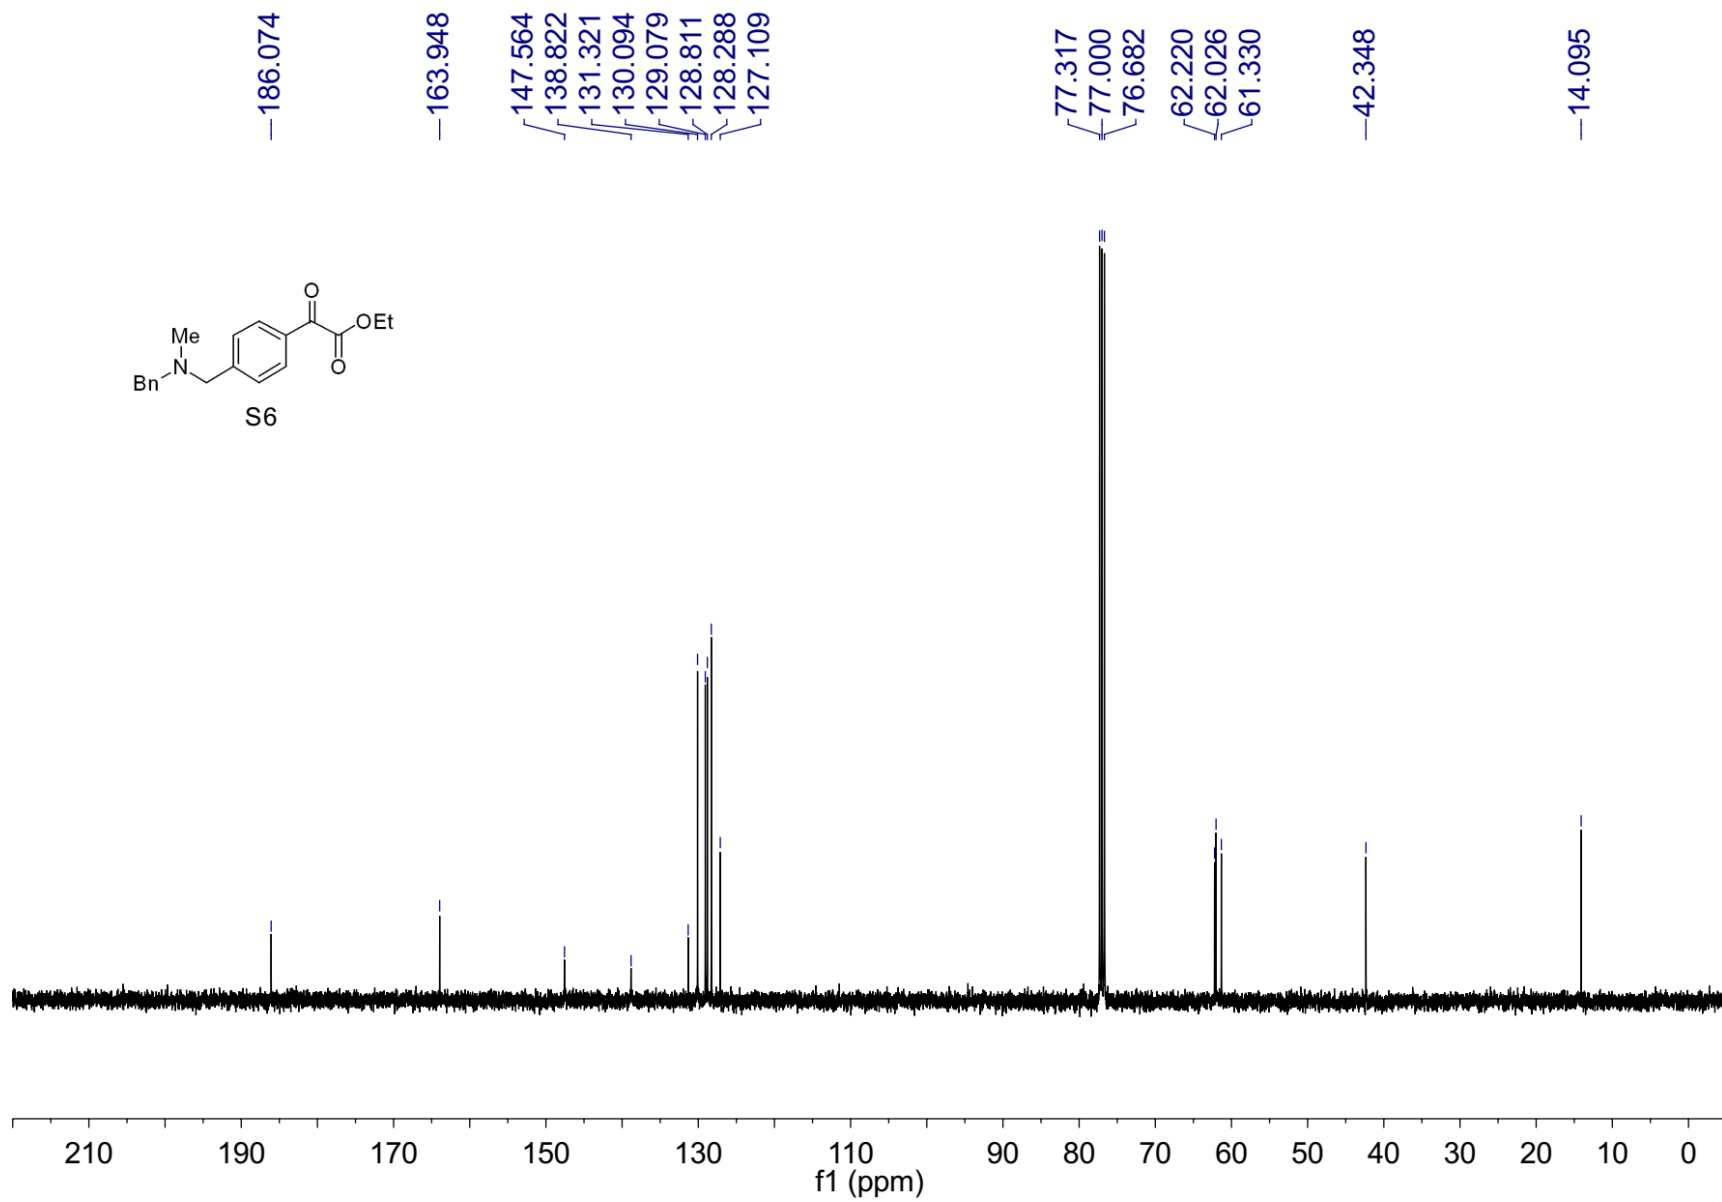

8.200  
7.860  
7.840  
7.603  
7.600  
7.582  
7.531  
7.514  
7.510  
7.505  
7.496  
7.477  
7.445  
7.423  
7.408  
7.405  
7.396  
7.378  
7.360  
7.323  
7.304  
7.284

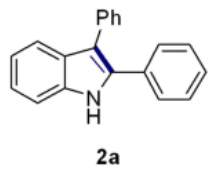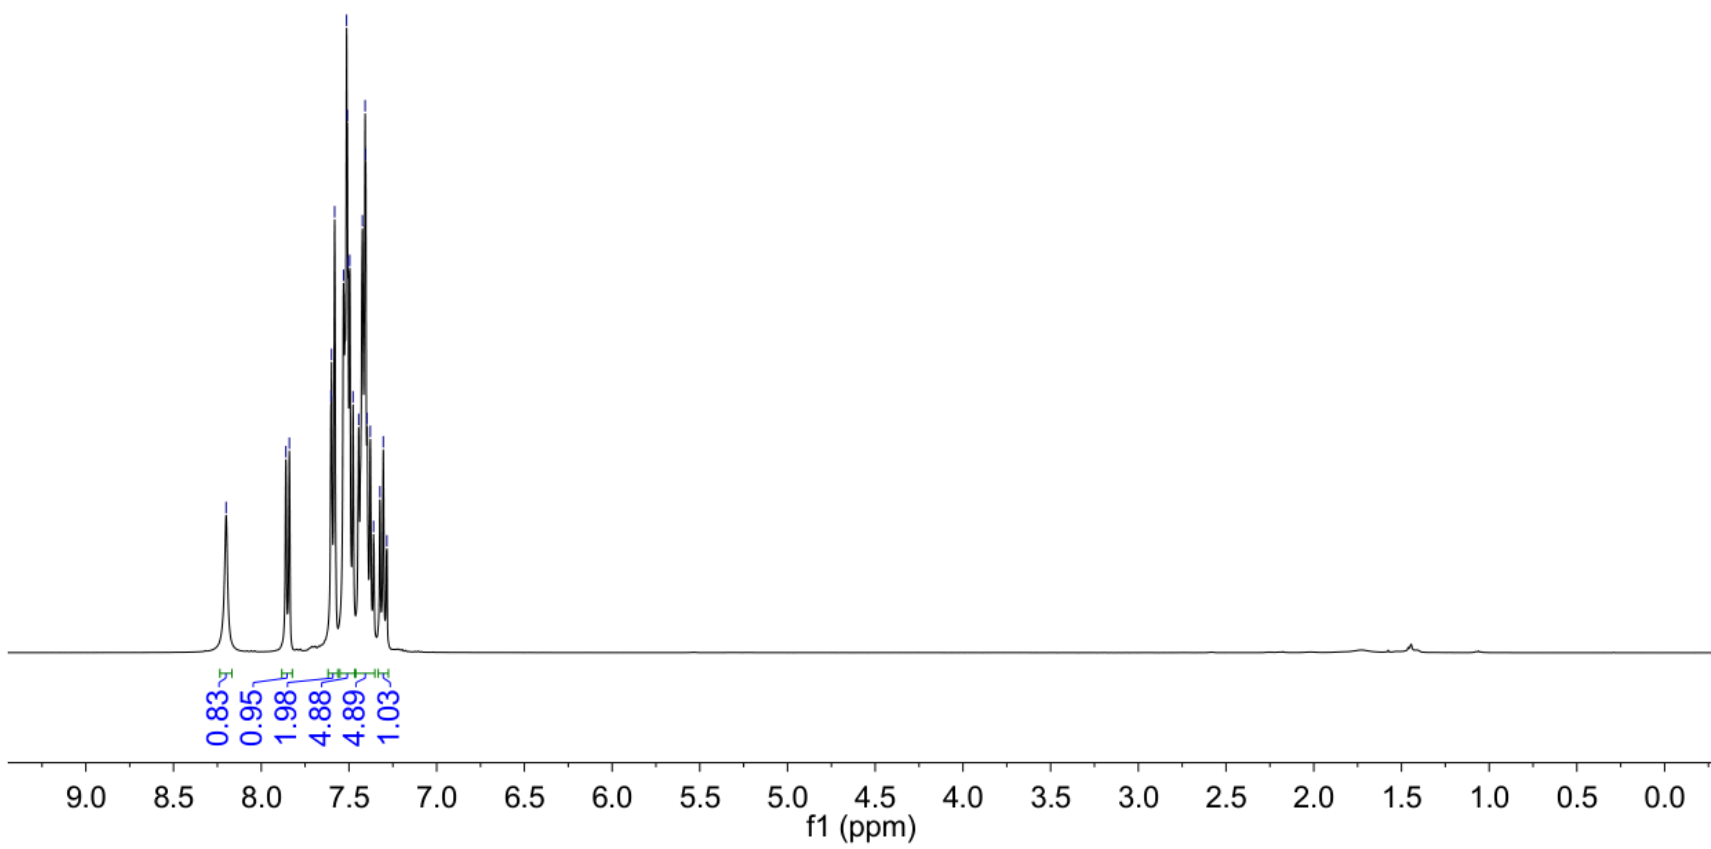

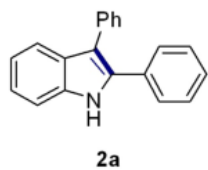

135.803  
135.000  
134.024  
132.561  
130.091  
128.659  
128.578  
128.474  
128.125  
127.601  
126.164  
122.611  
120.358  
119.614  
114.912  
110.897

77.318  
77.000  
76.683

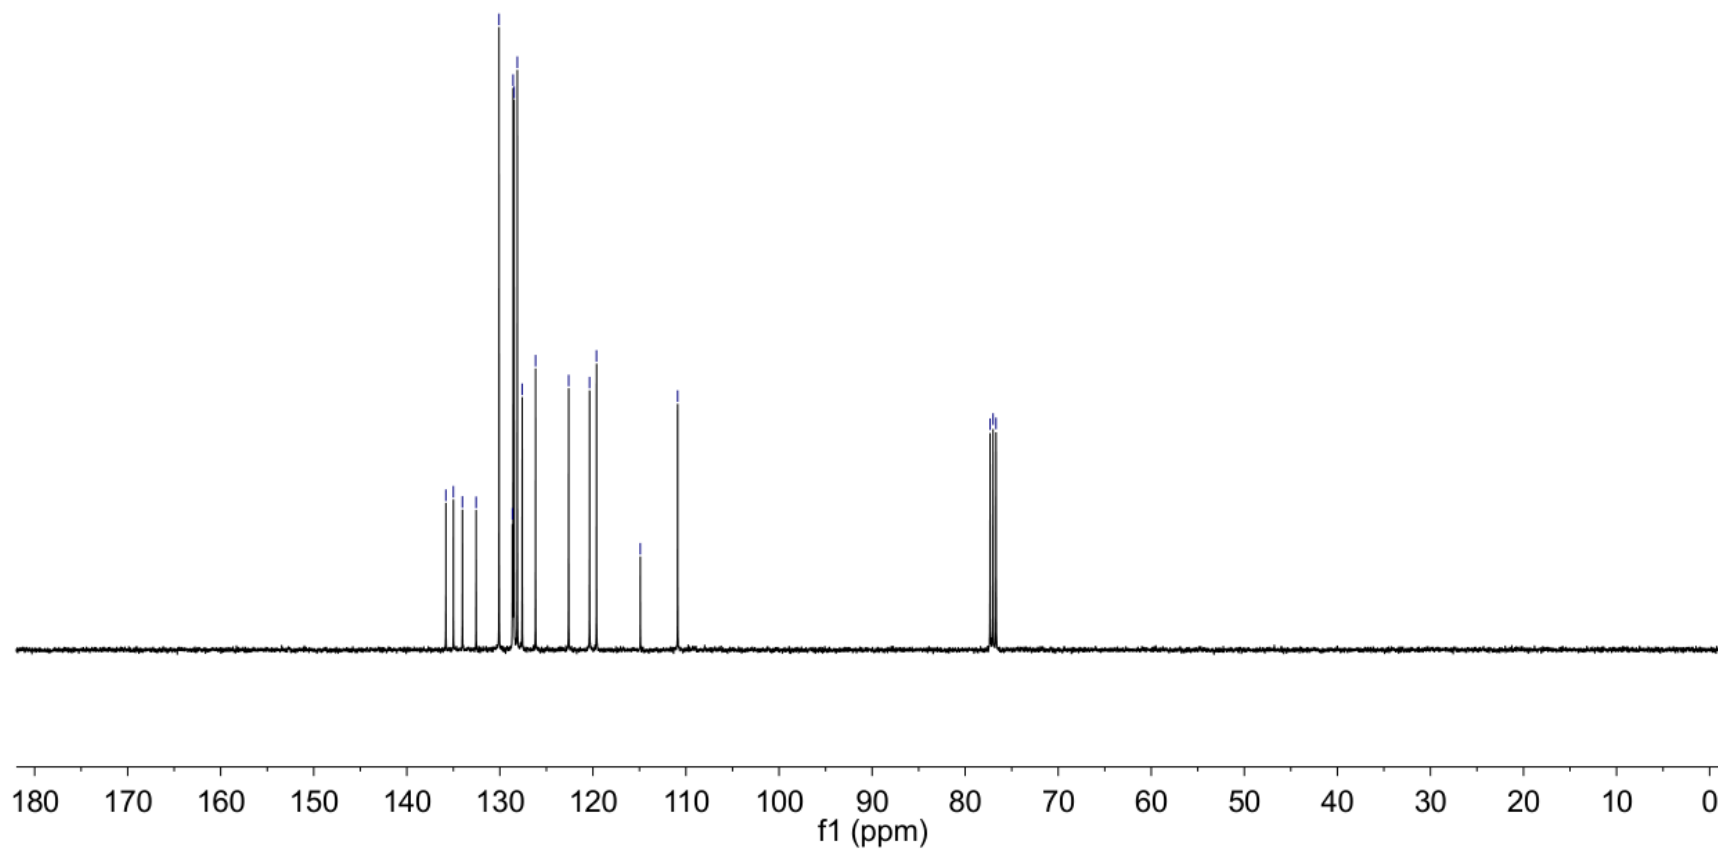

8.181  
7.776  
7.756  
7.542  
7.538  
7.534  
7.521  
7.470  
7.465  
7.451  
7.432  
7.376  
7.356  
7.344  
7.341  
7.323  
7.321  
7.306  
7.303  
7.286  
7.283  
7.247  
7.244  
7.227  
7.209  
7.207  
7.192  
7.172

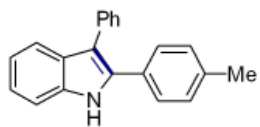

2b

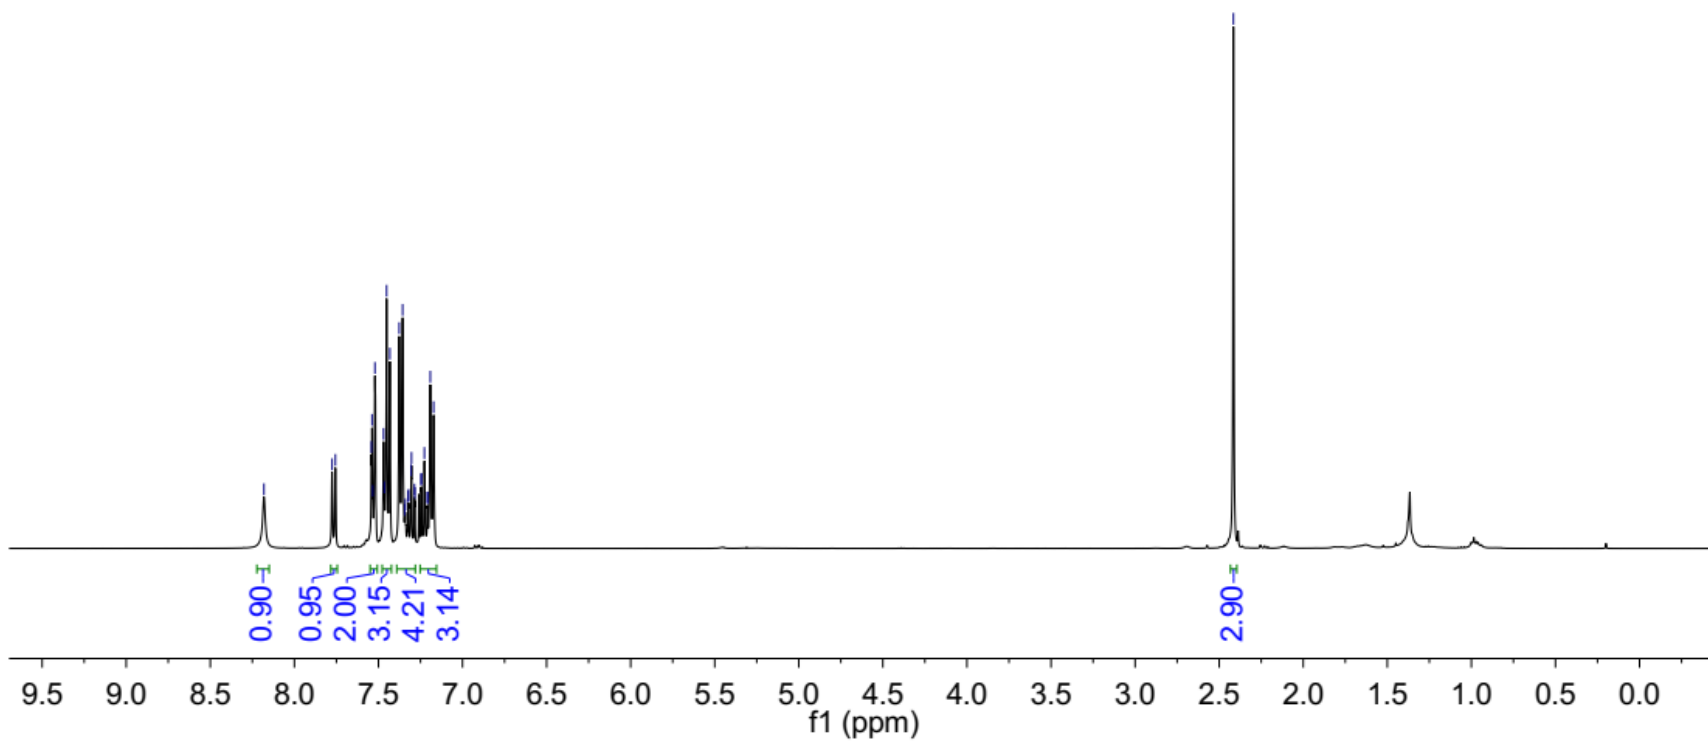

-2.415

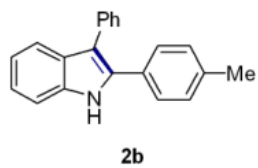

137.517  
135.772  
135.212  
134.213  
130.119  
129.726  
129.346  
128.781  
128.449  
127.997  
126.096  
122.460  
120.308  
119.520  
114.547  
110.814

77.318  
77.000  
76.682

21.192

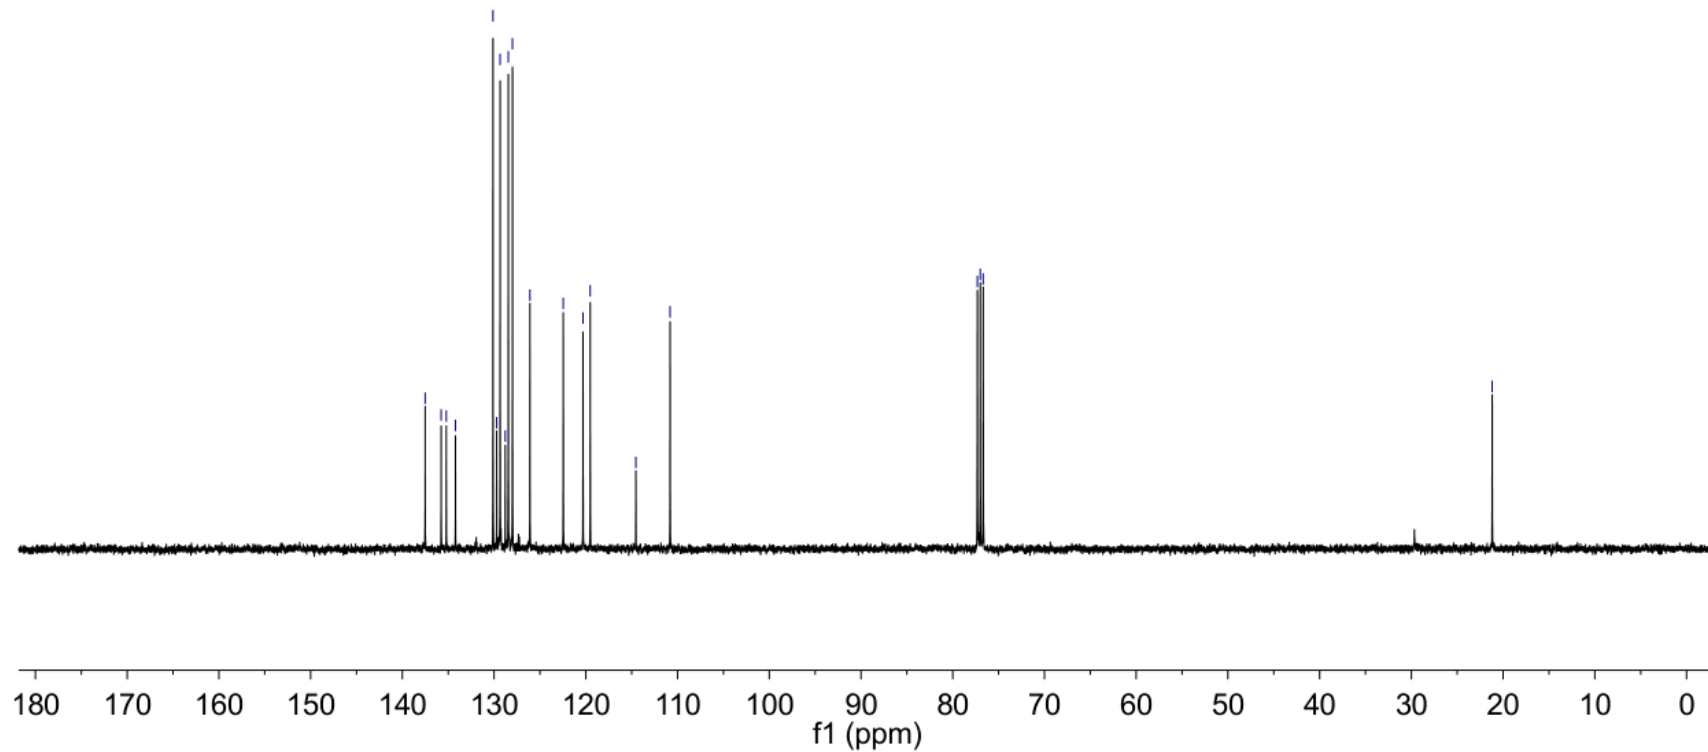

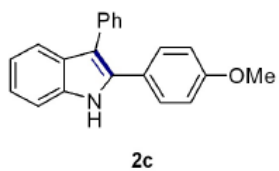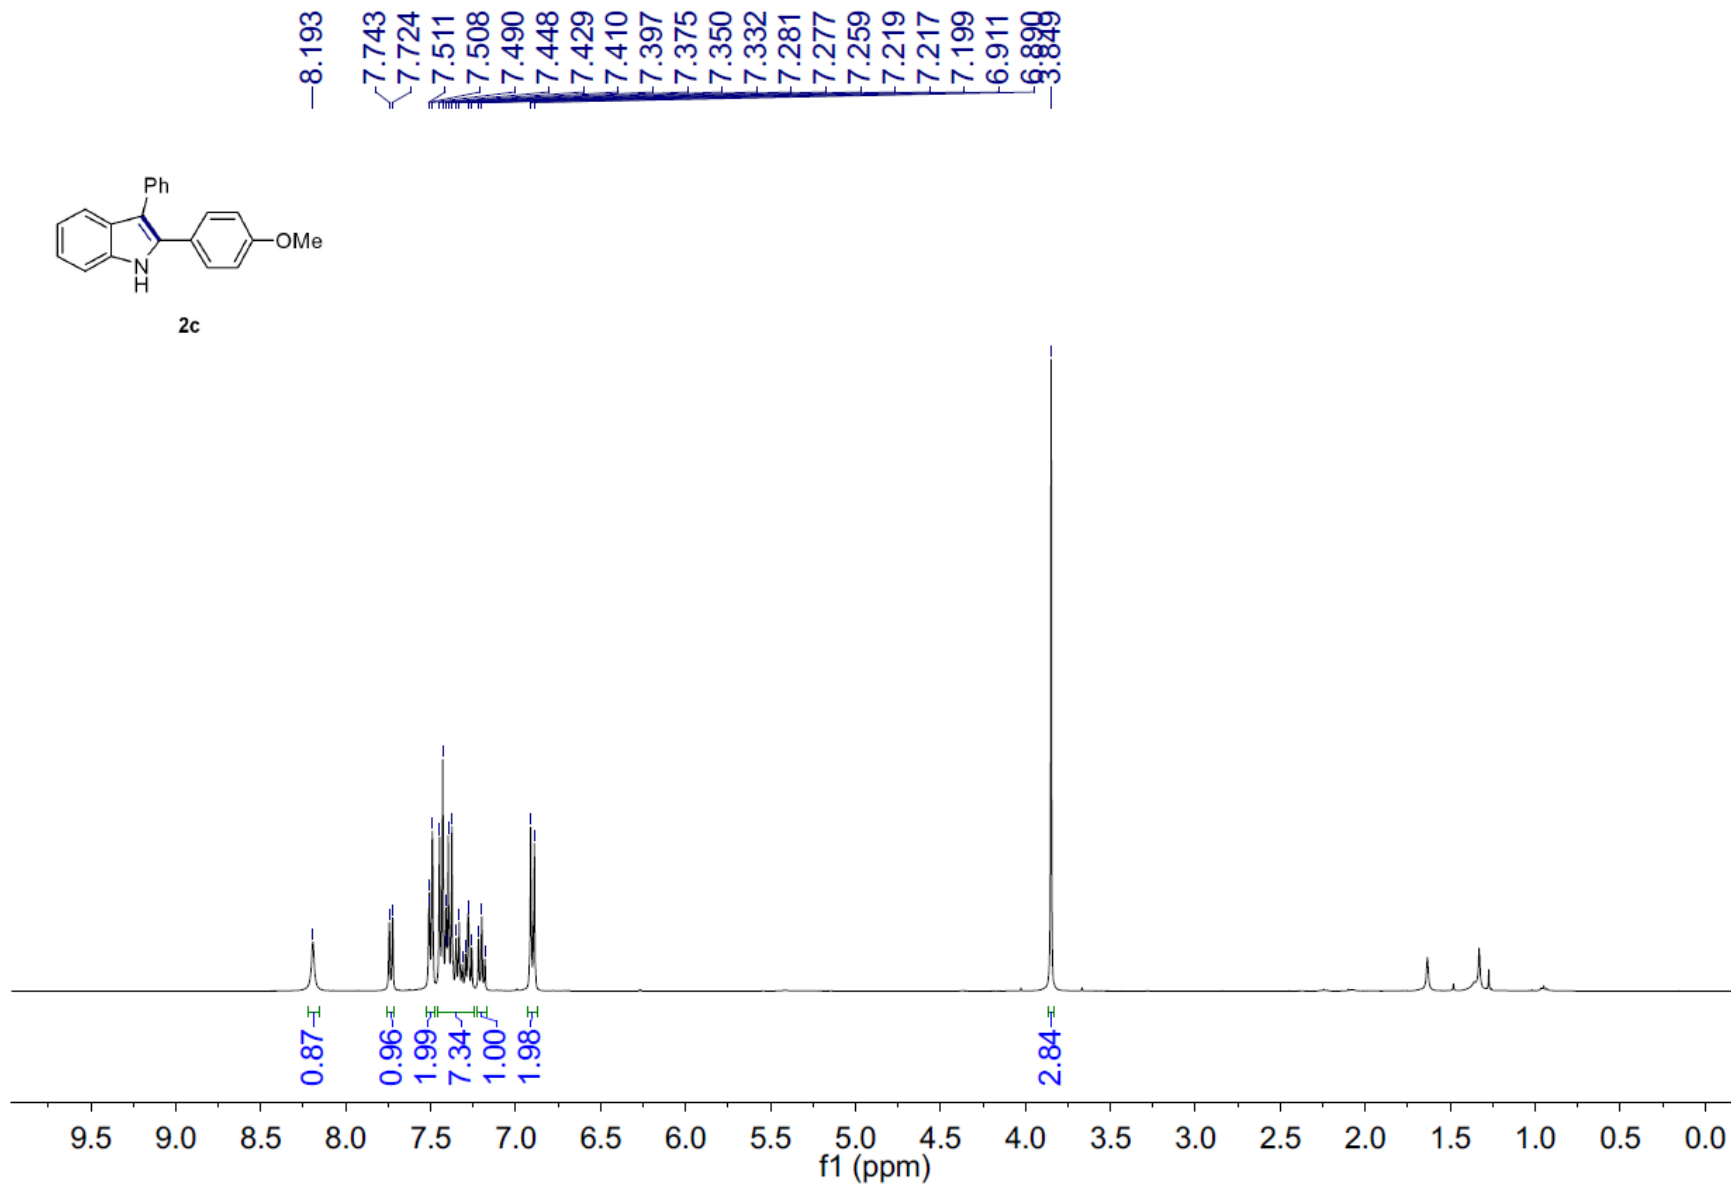

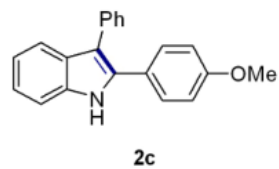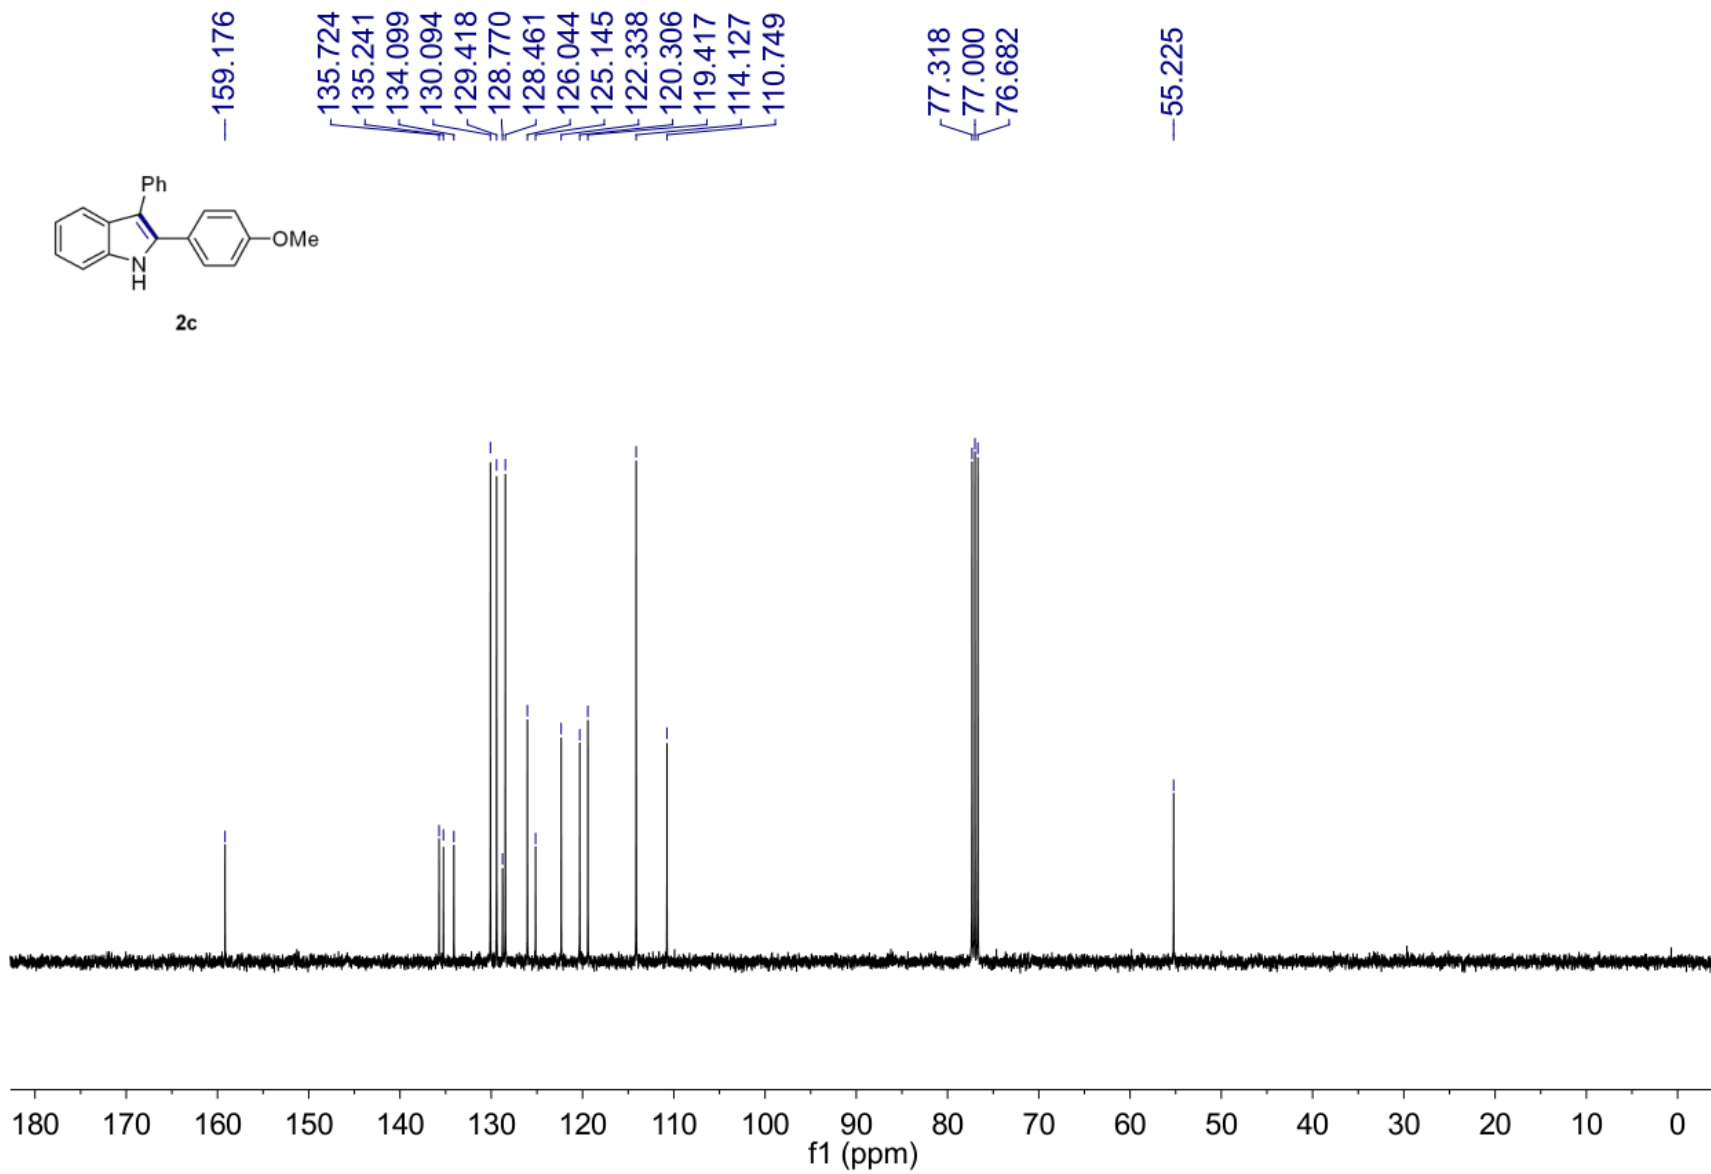



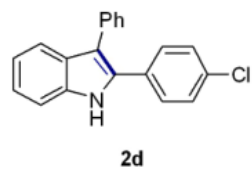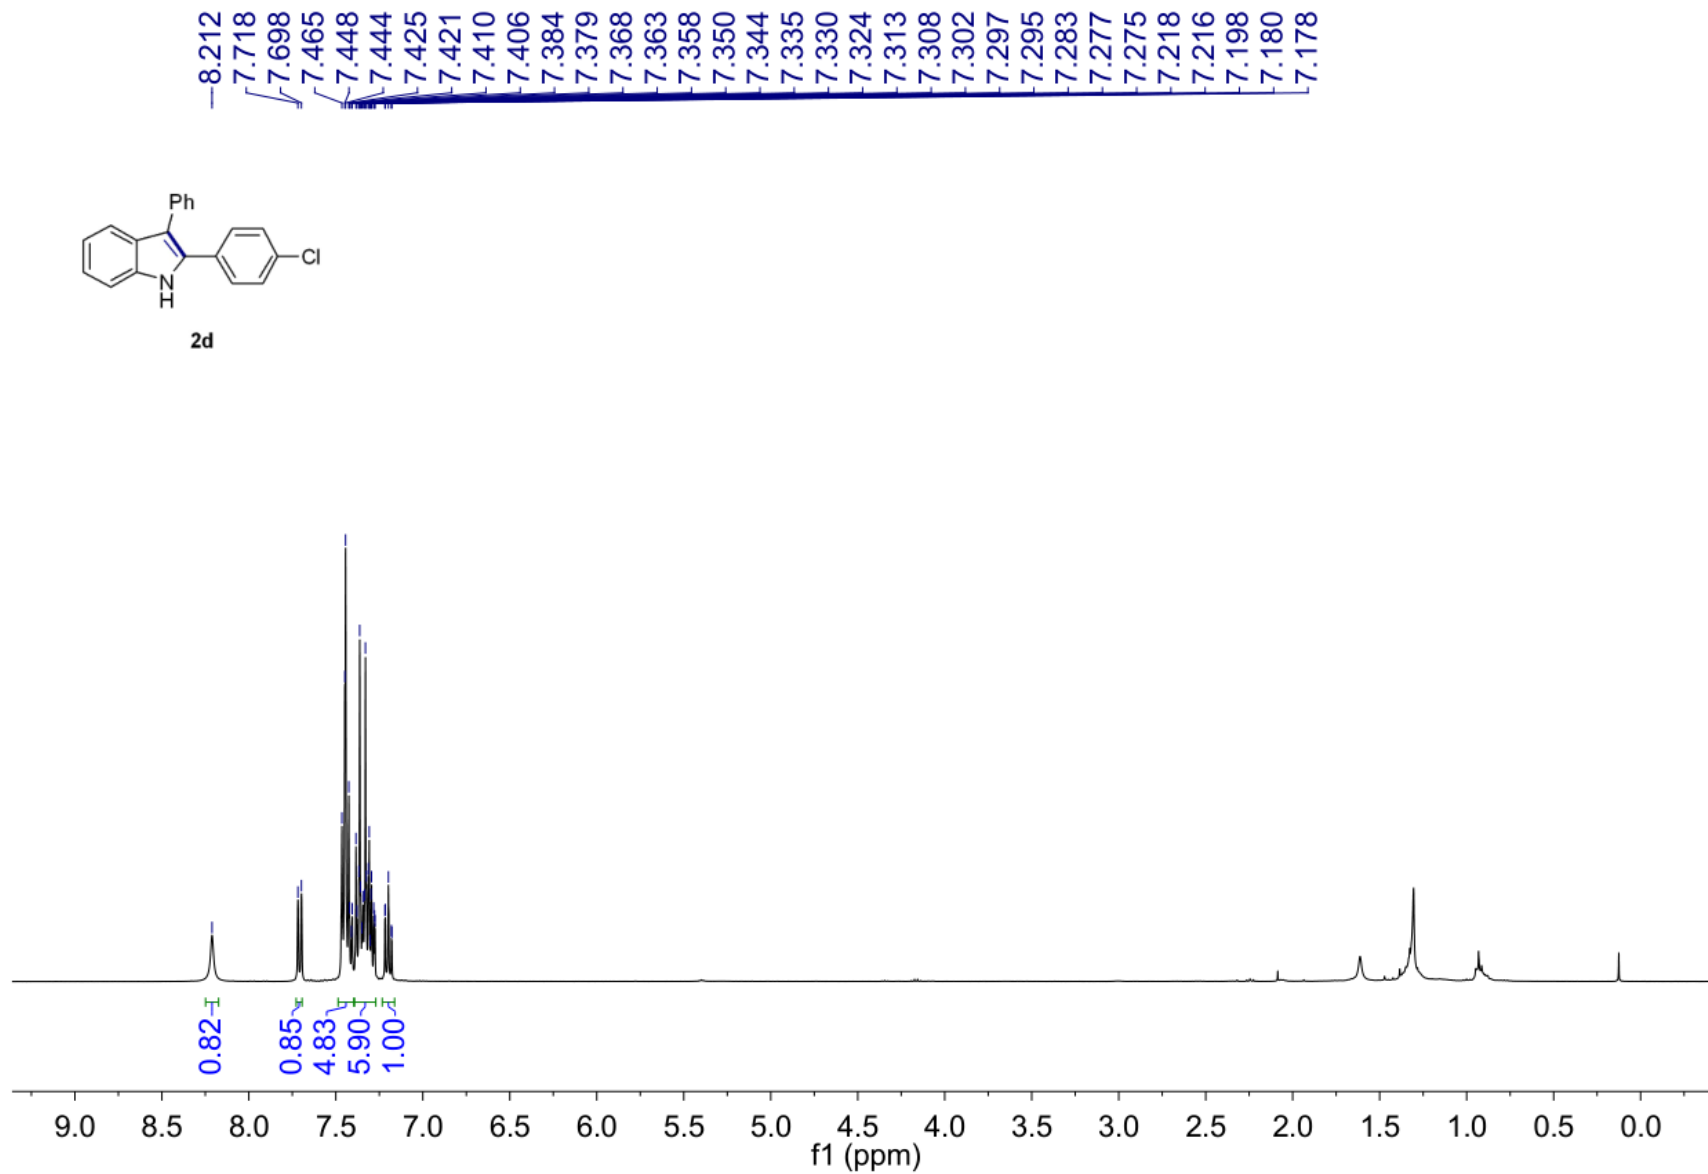

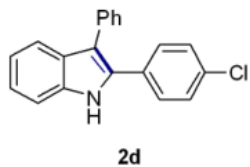

135.958  
134.698  
133.568  
132.783  
131.143  
130.085  
129.319  
128.915  
128.696  
128.629  
126.450  
122.987  
120.590  
119.767  
115.577  
110.918

77.318  
77.000  
76.683

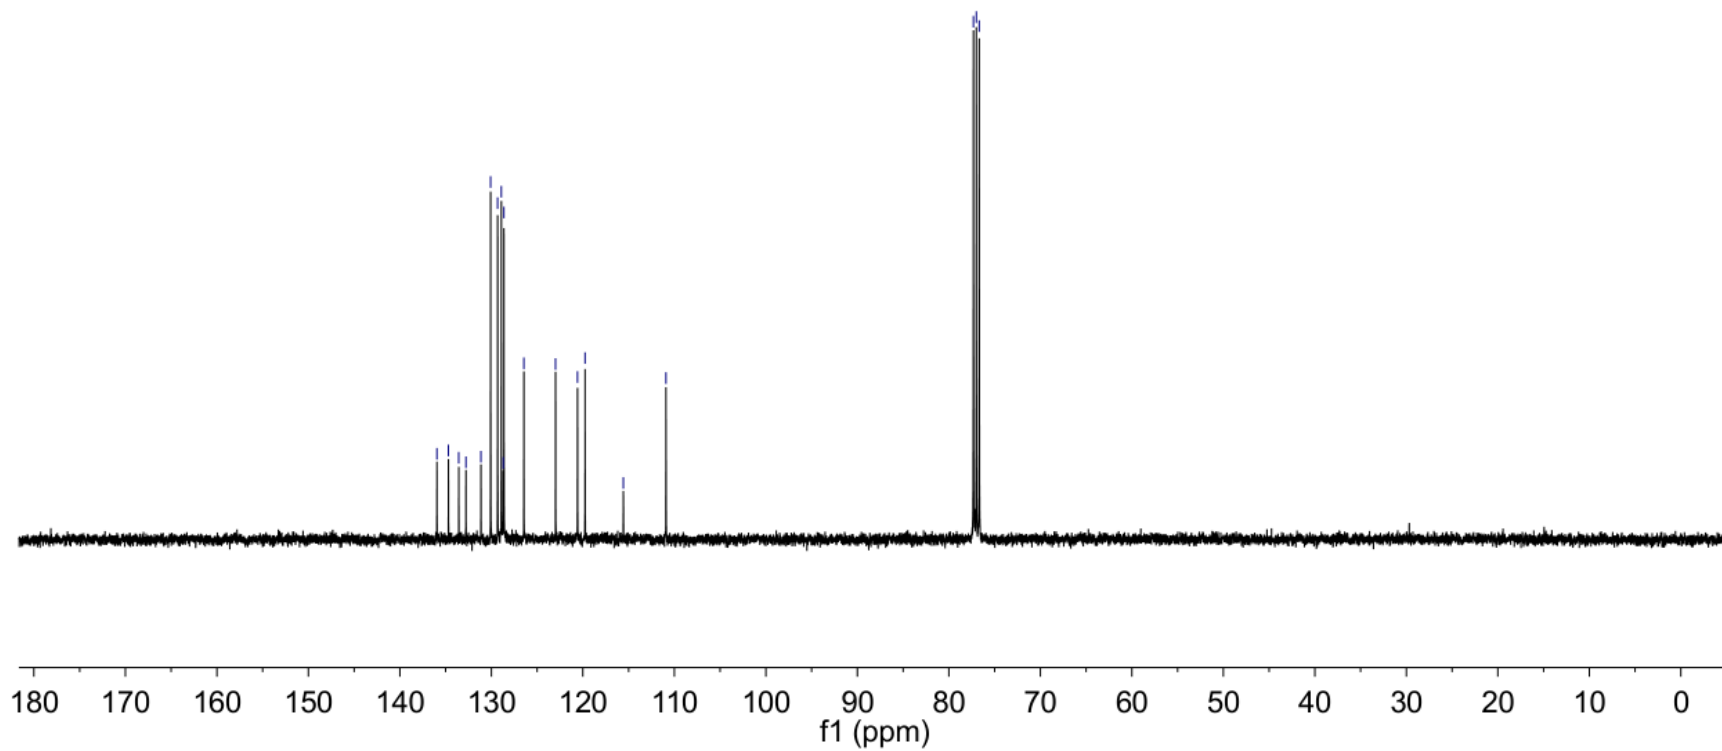

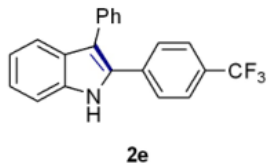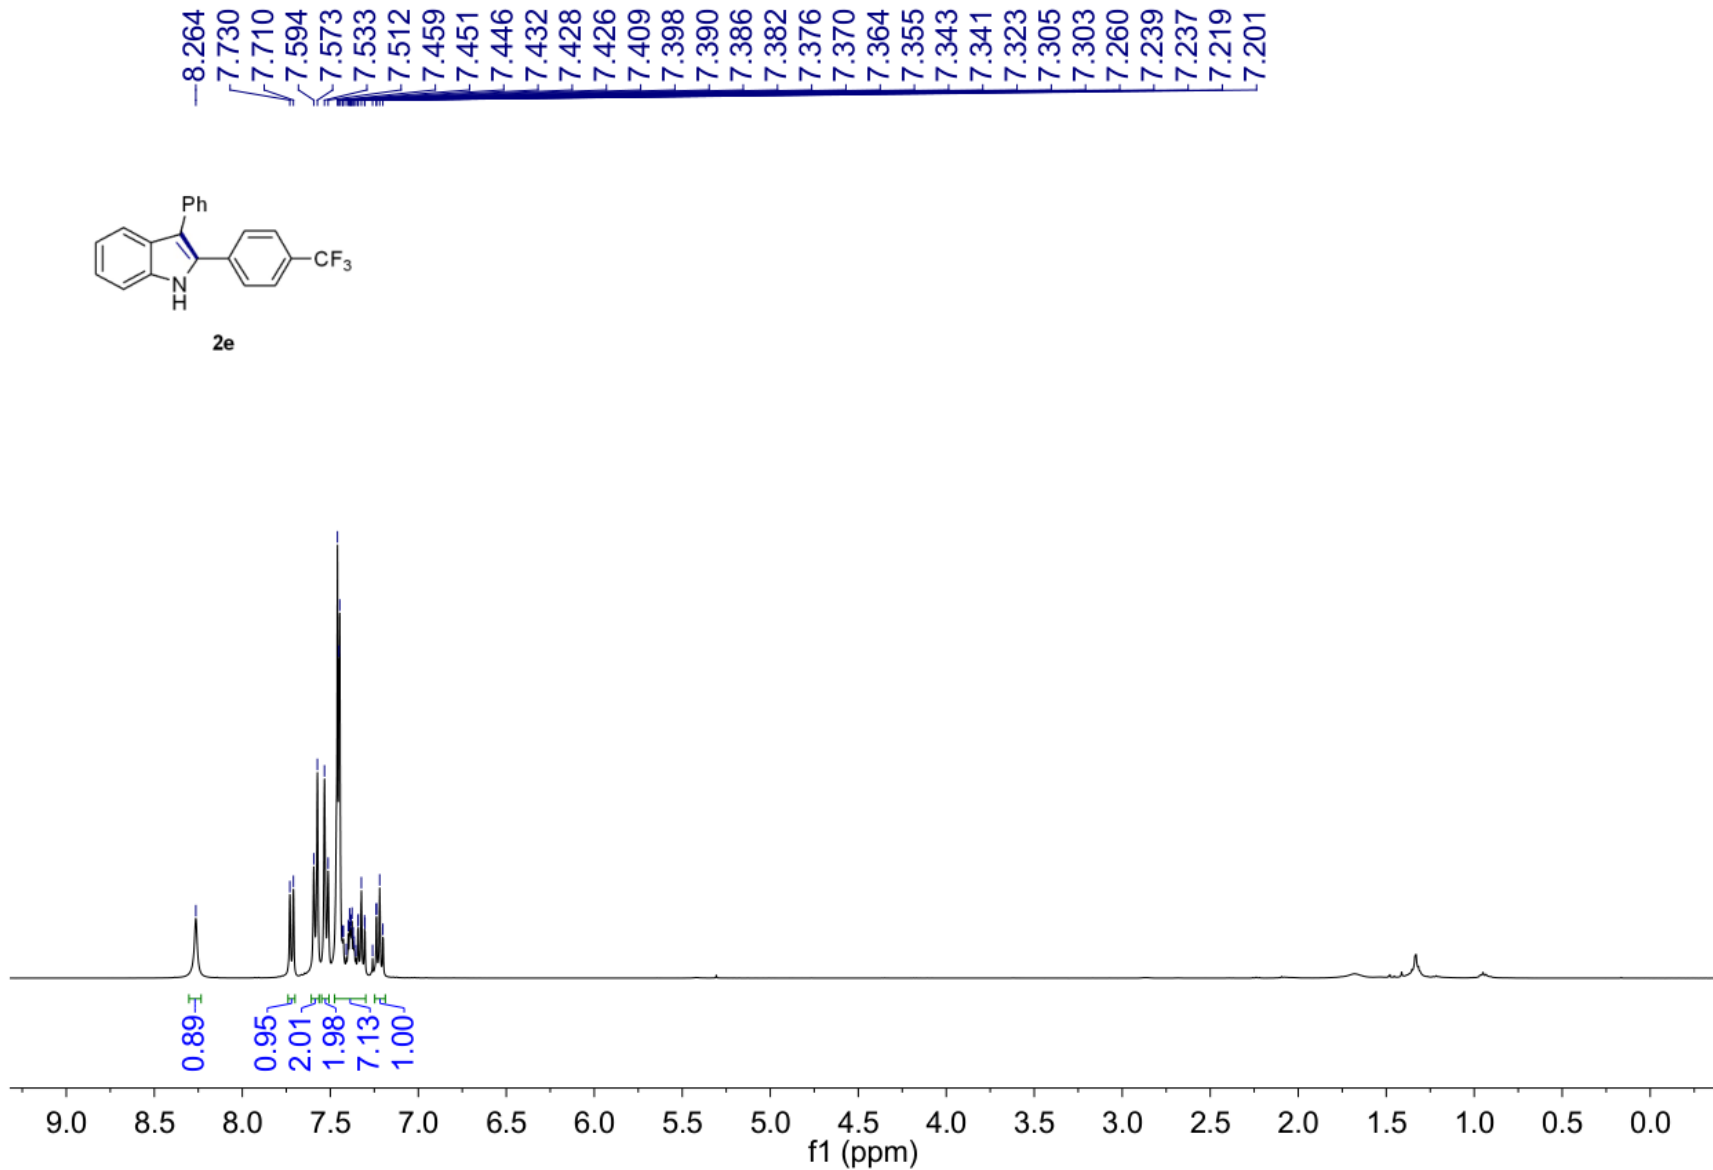

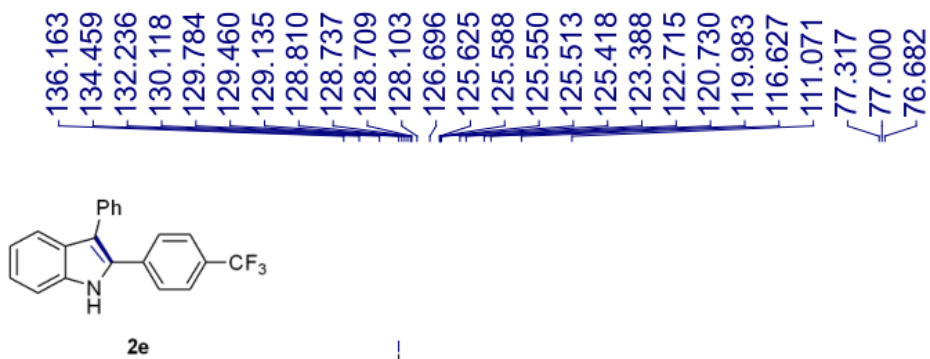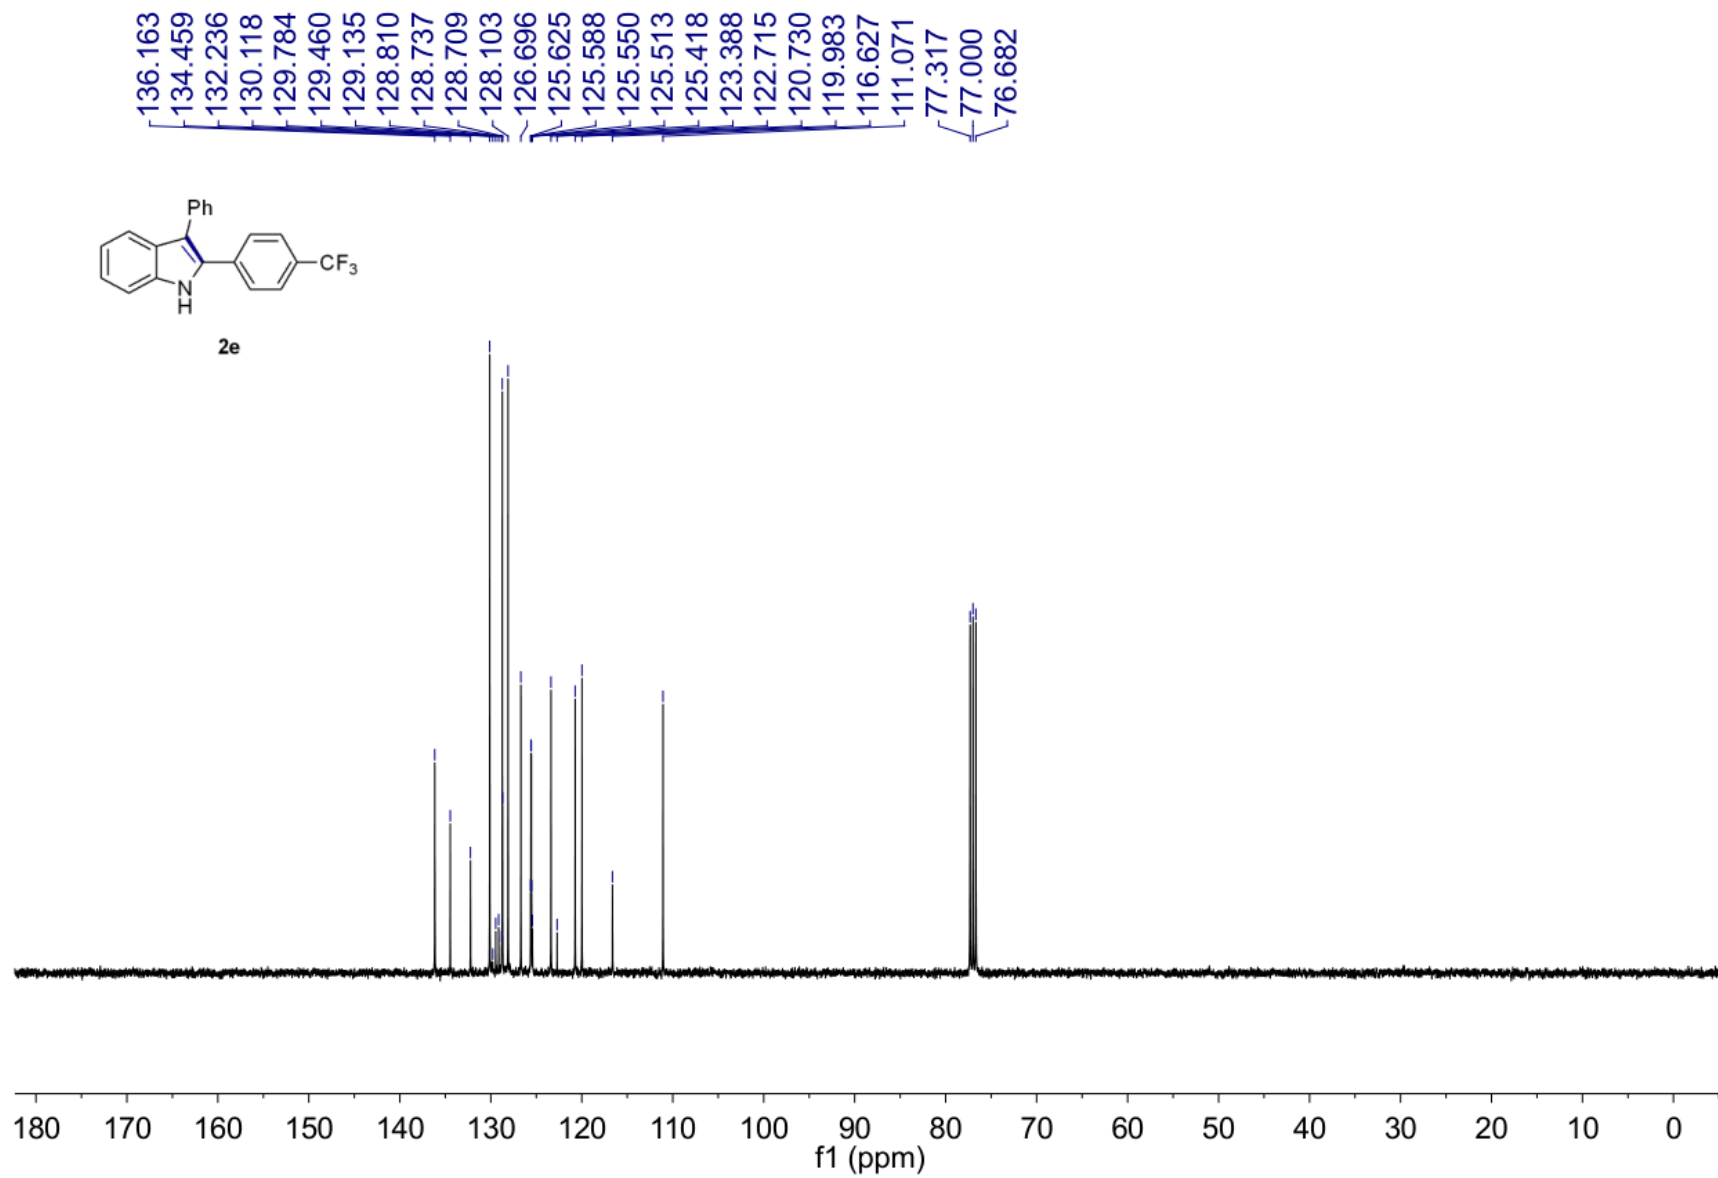

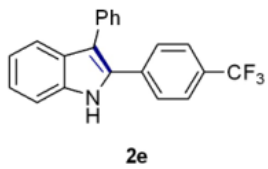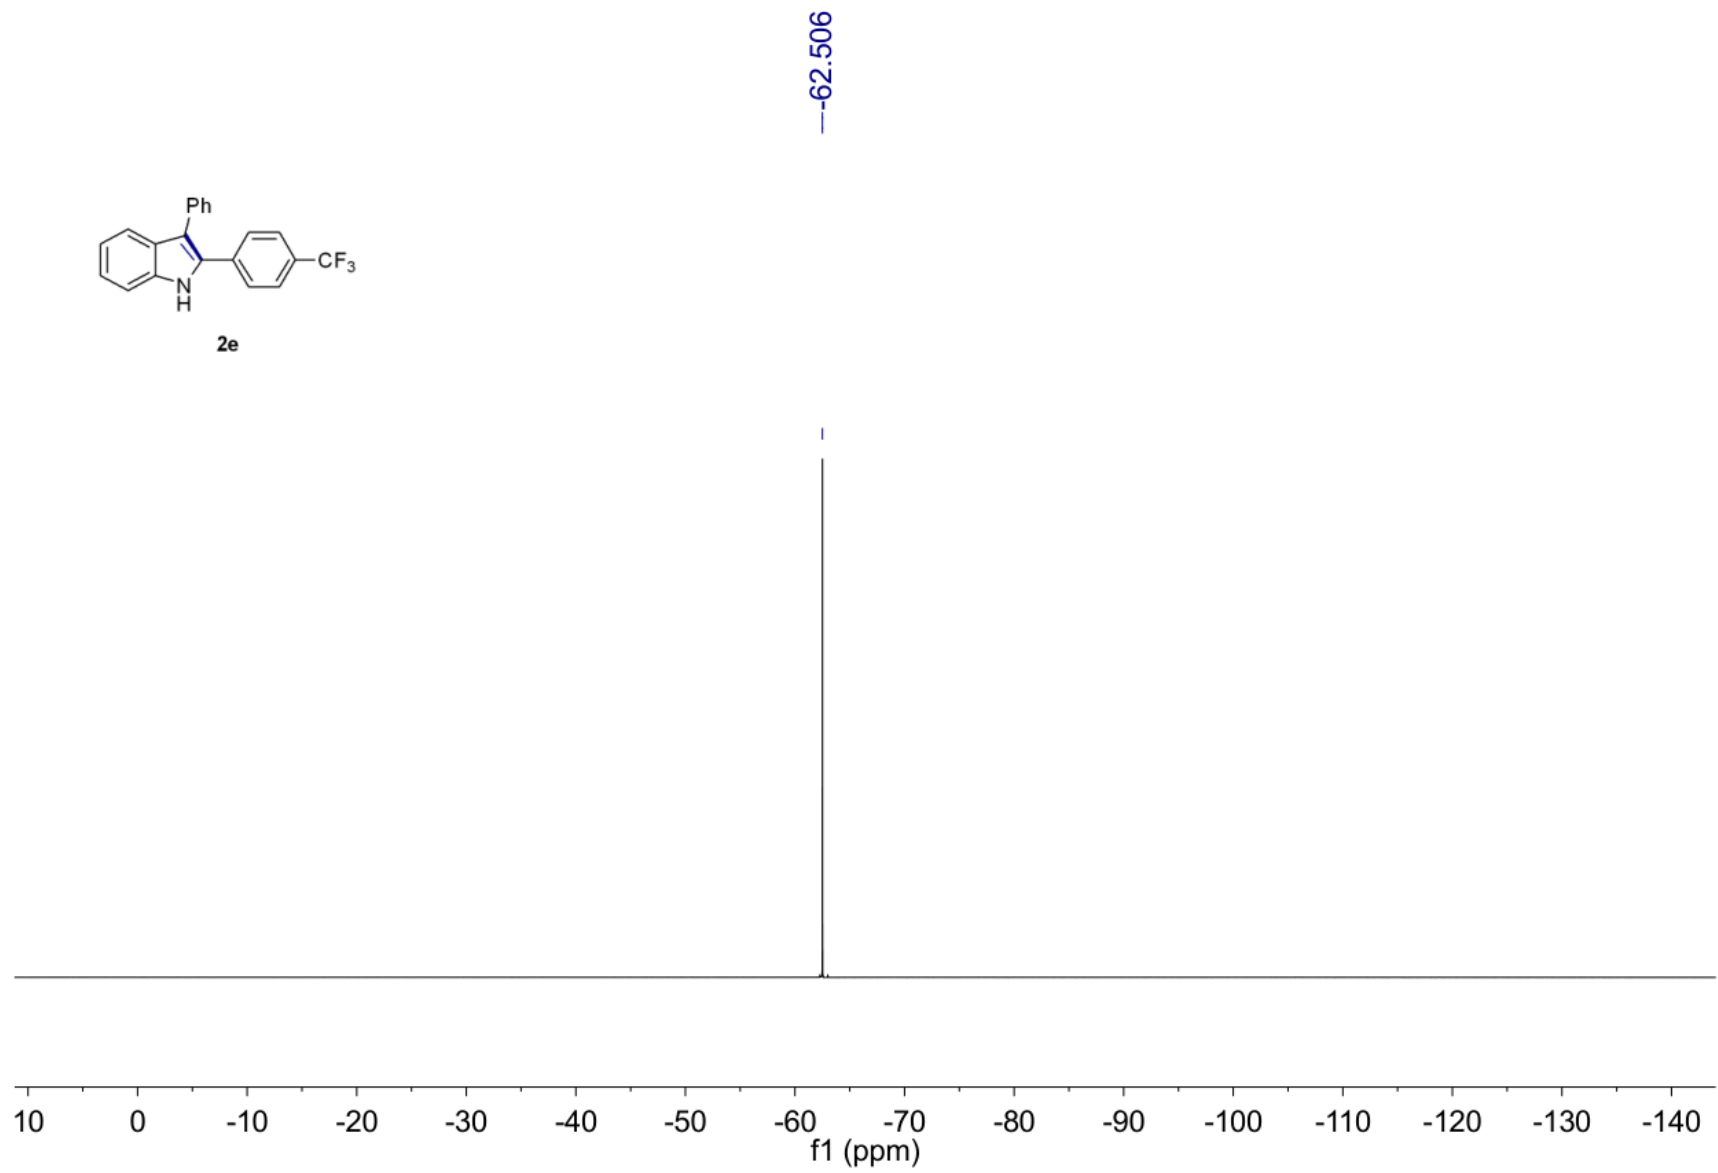

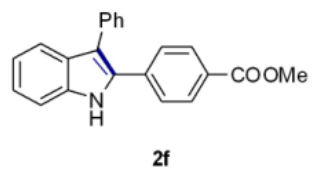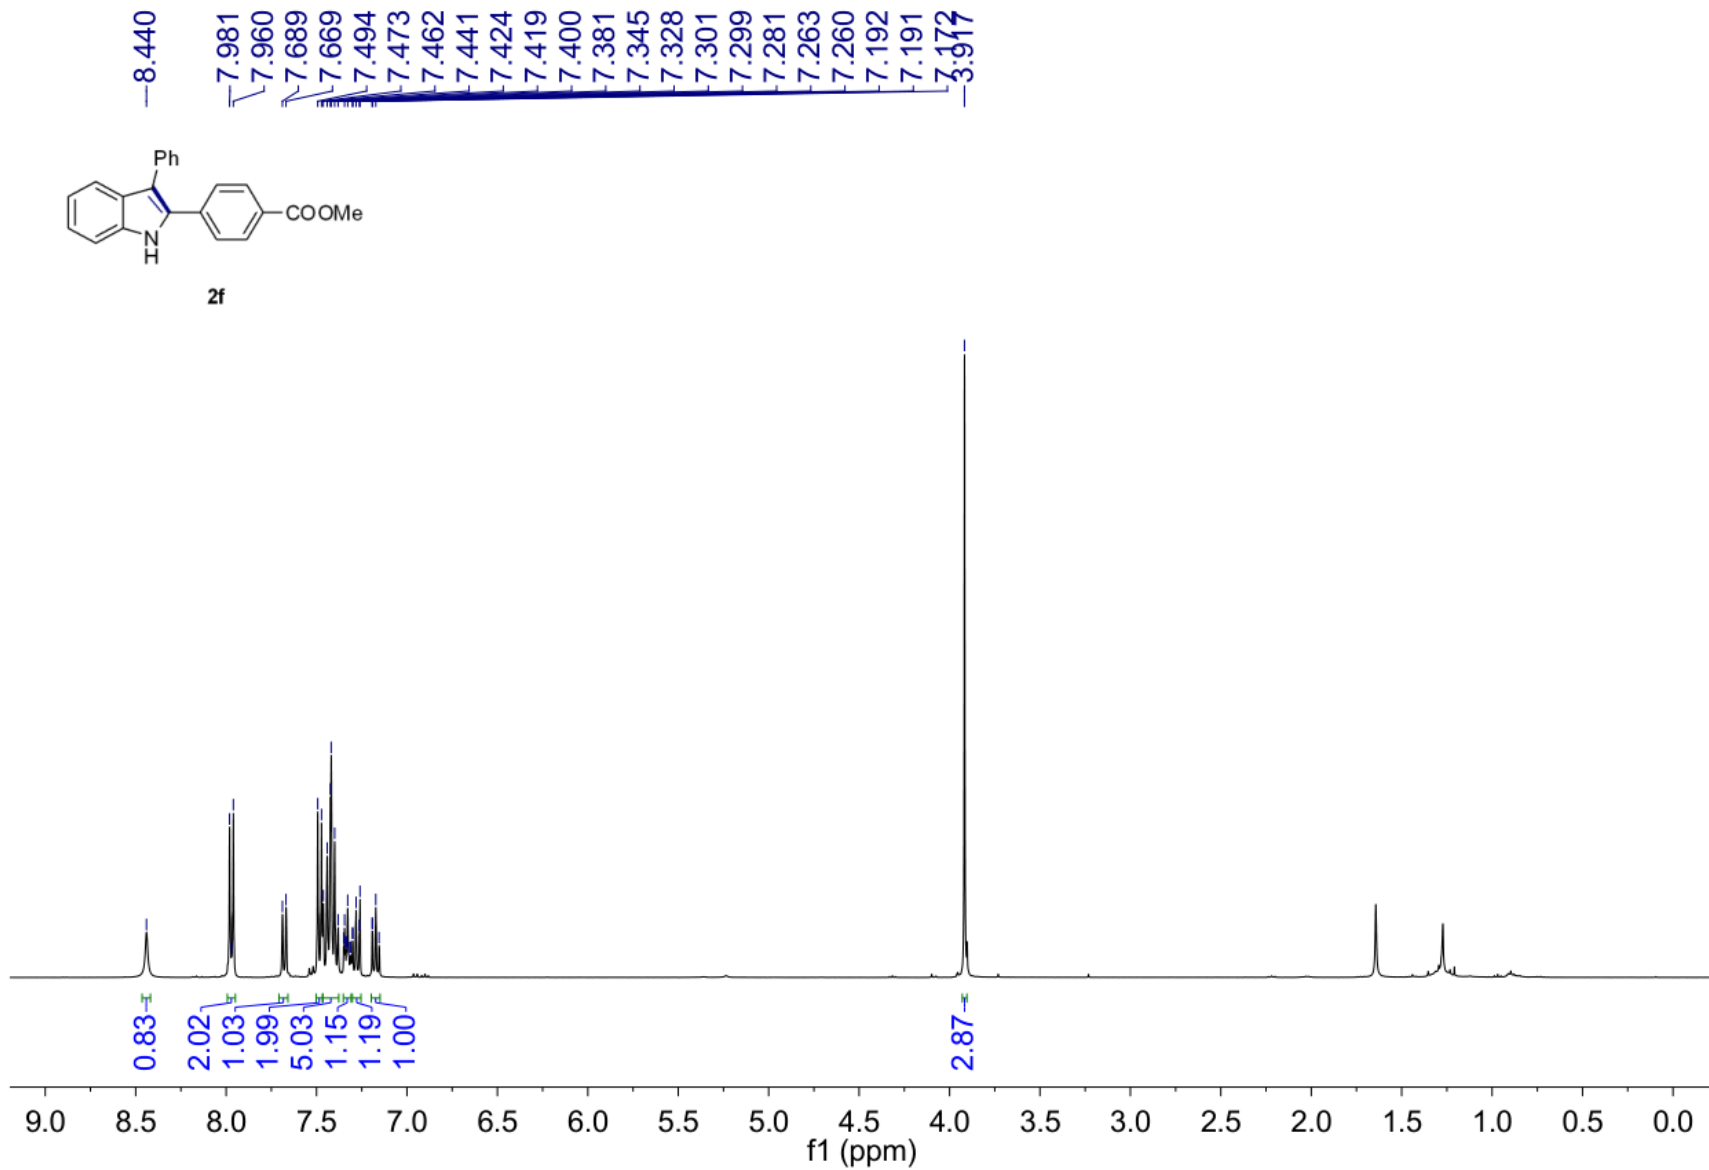

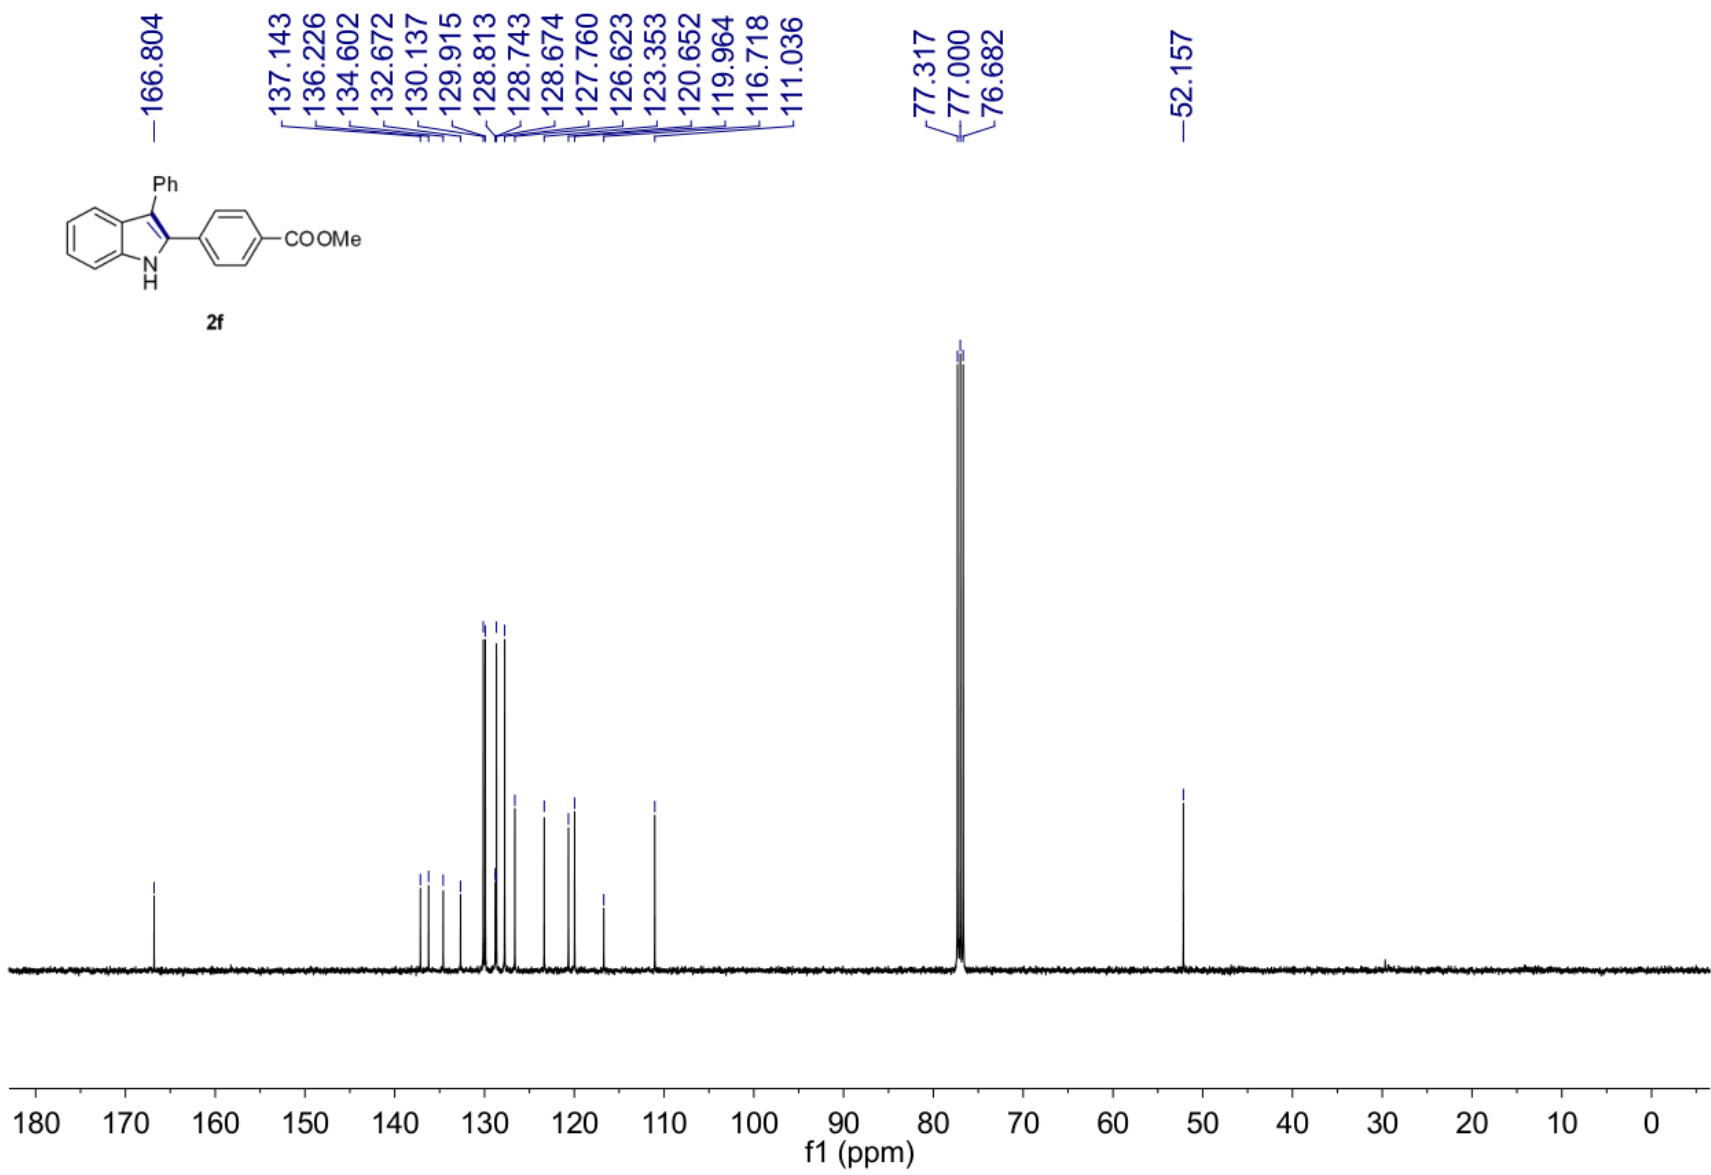

8.331  
7.962  
7.831  
7.816  
7.806  
7.795  
7.780  
7.751  
7.736  
7.730  
7.516  
7.506  
7.502  
7.496  
7.488  
7.482  
7.475  
7.471  
7.460  
7.454  
7.449  
7.410  
7.406  
7.393  
7.374  
7.337  
7.333  
7.324  
7.319  
7.310  
7.308  
7.303  
7.300  
7.290  
7.272  
7.270  
7.260  
7.217  
7.215  
7.197  
7.180

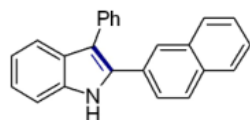

2g

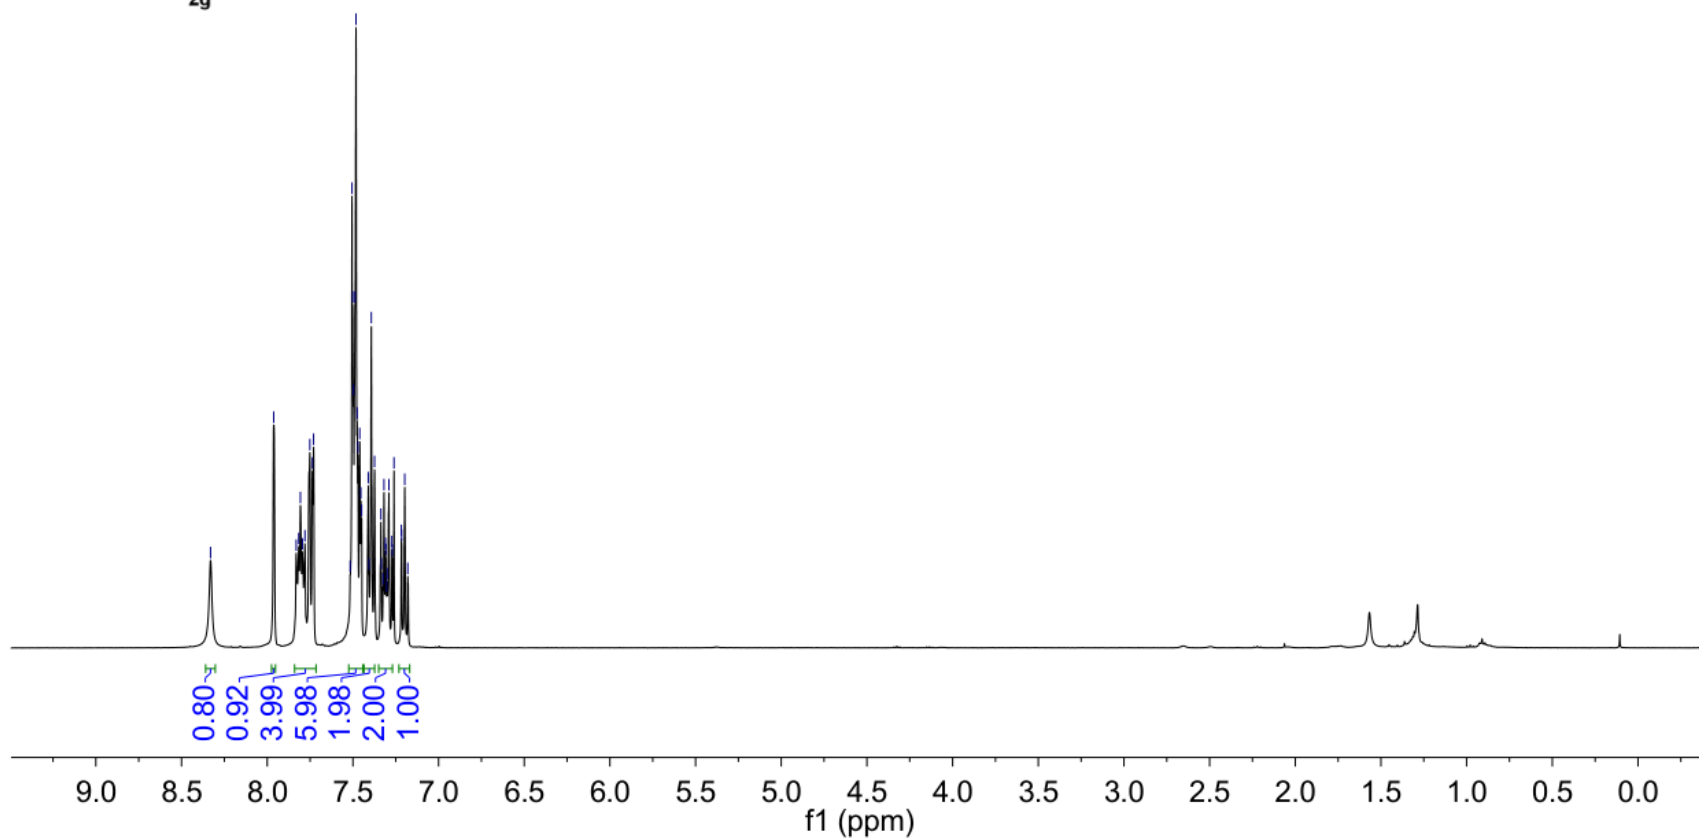



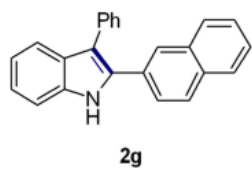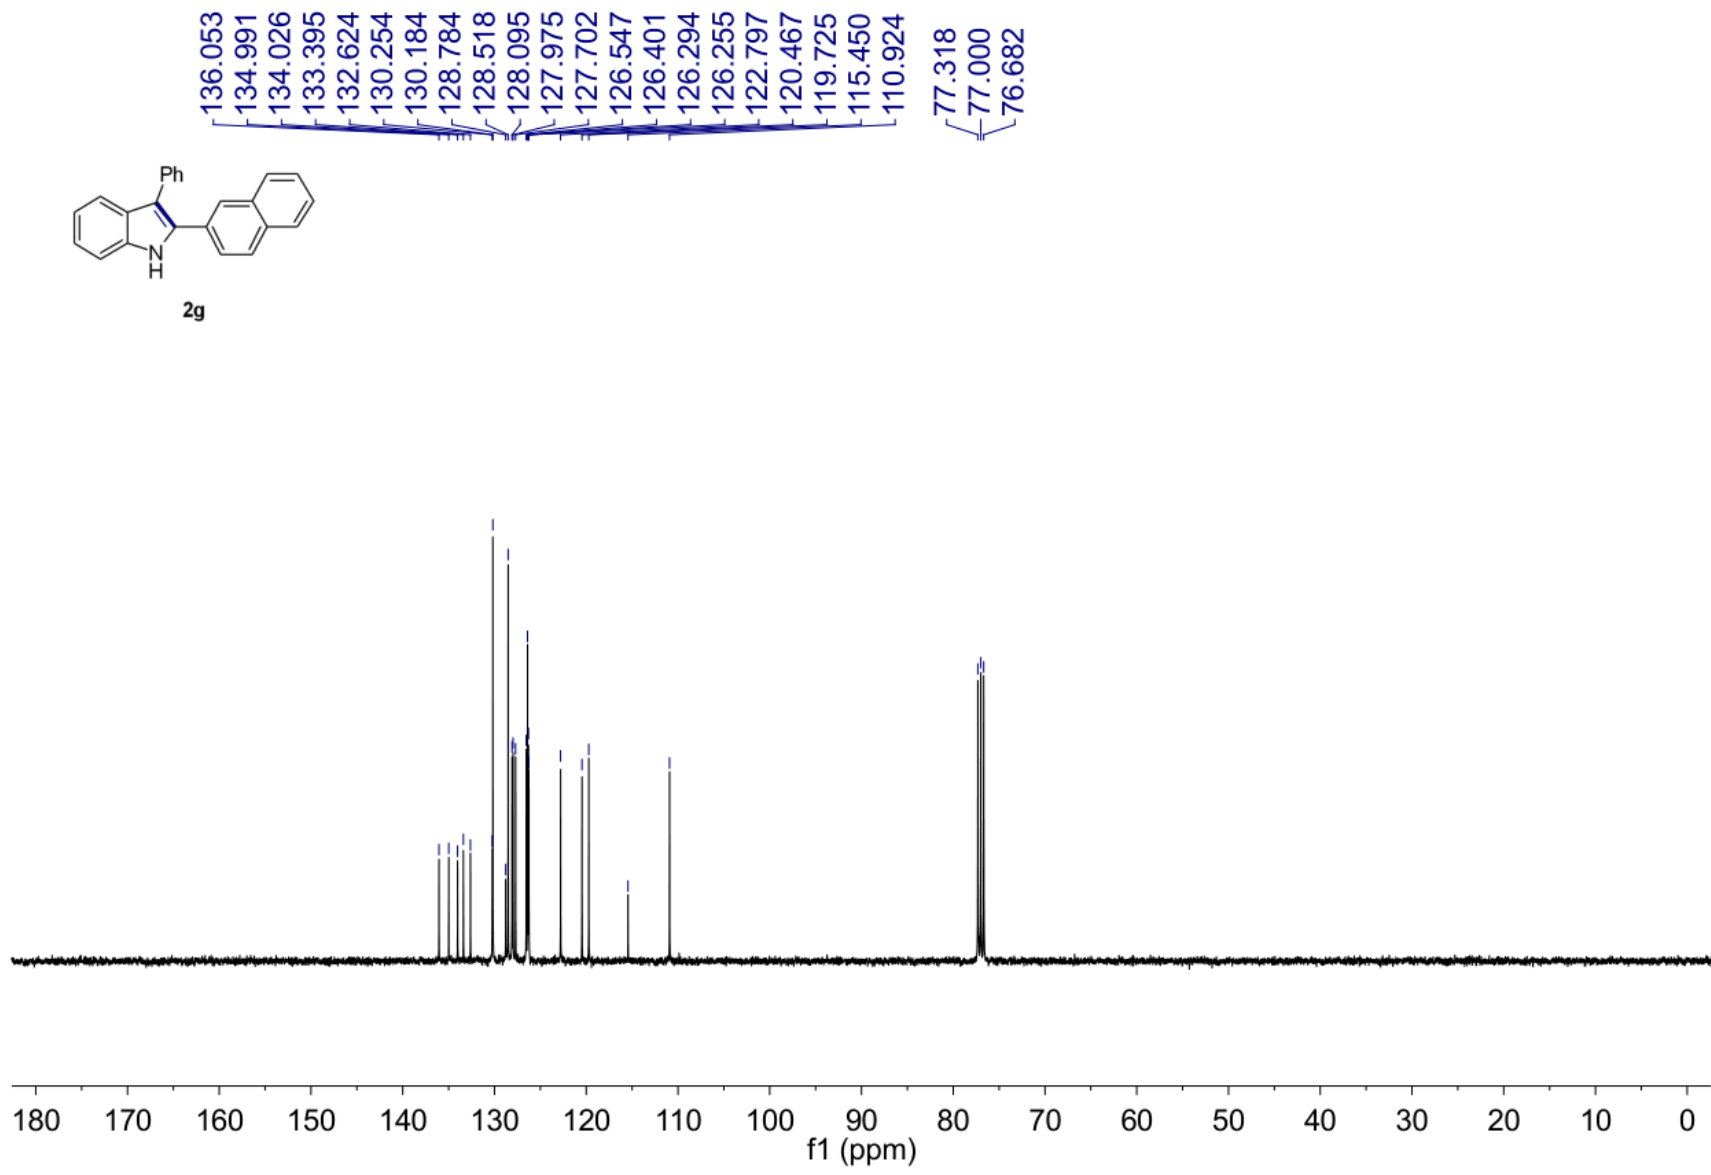

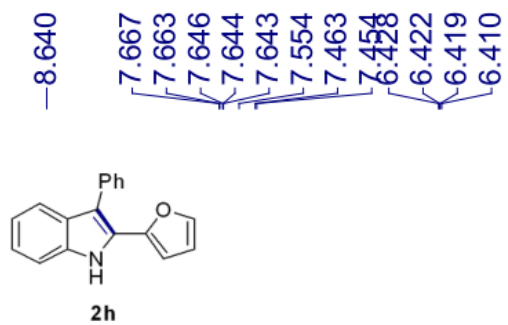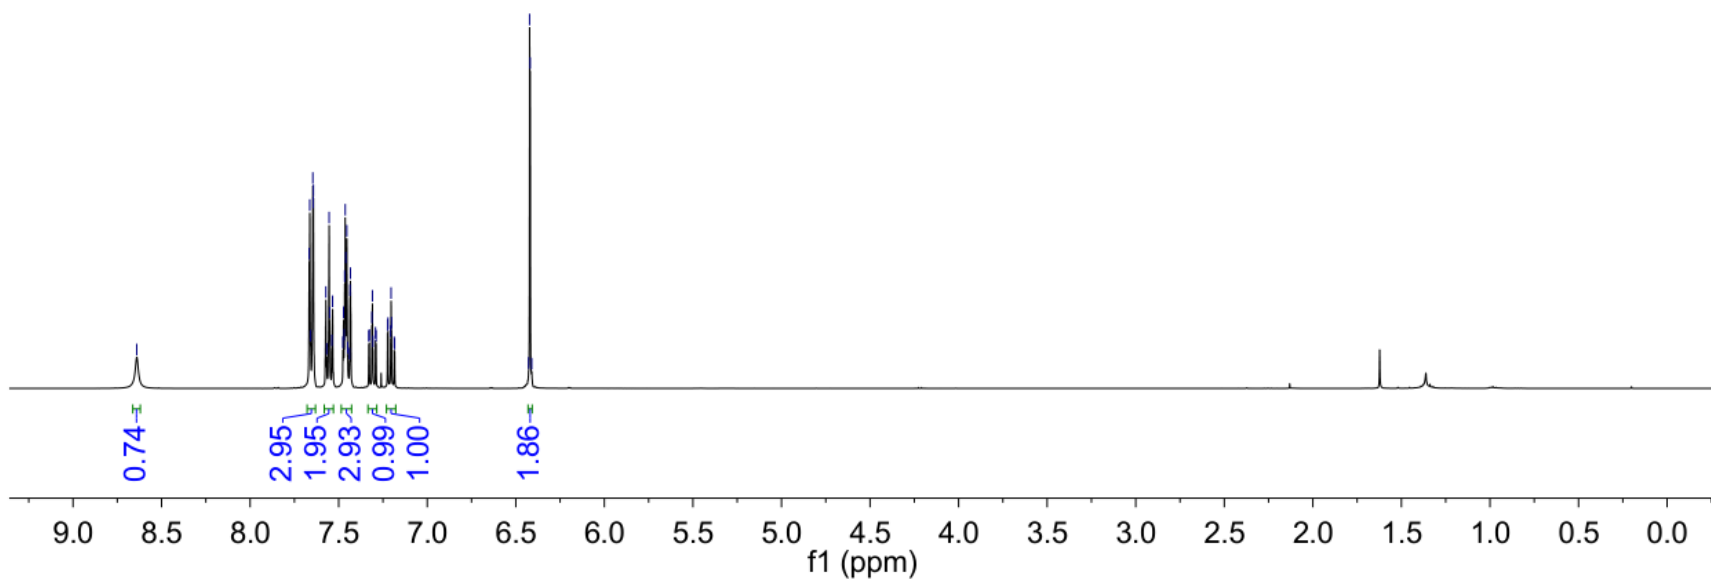

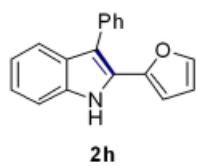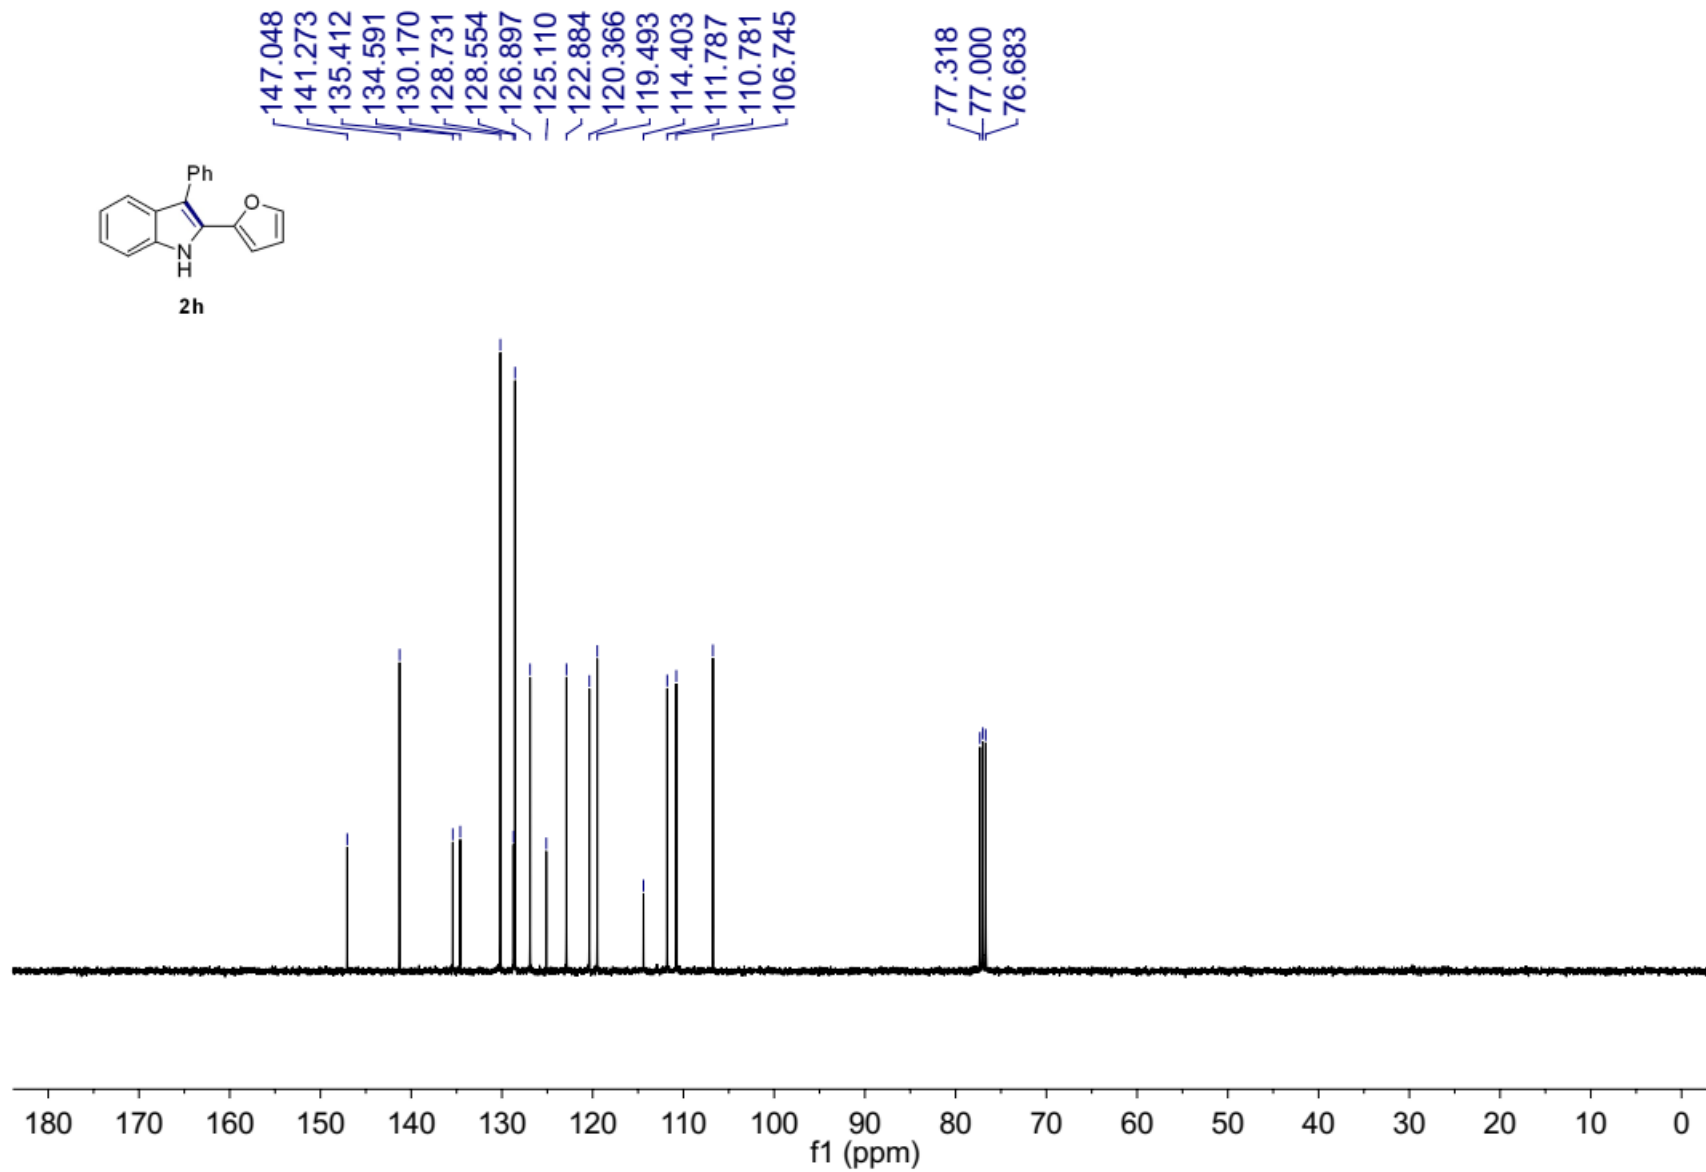

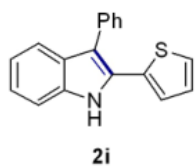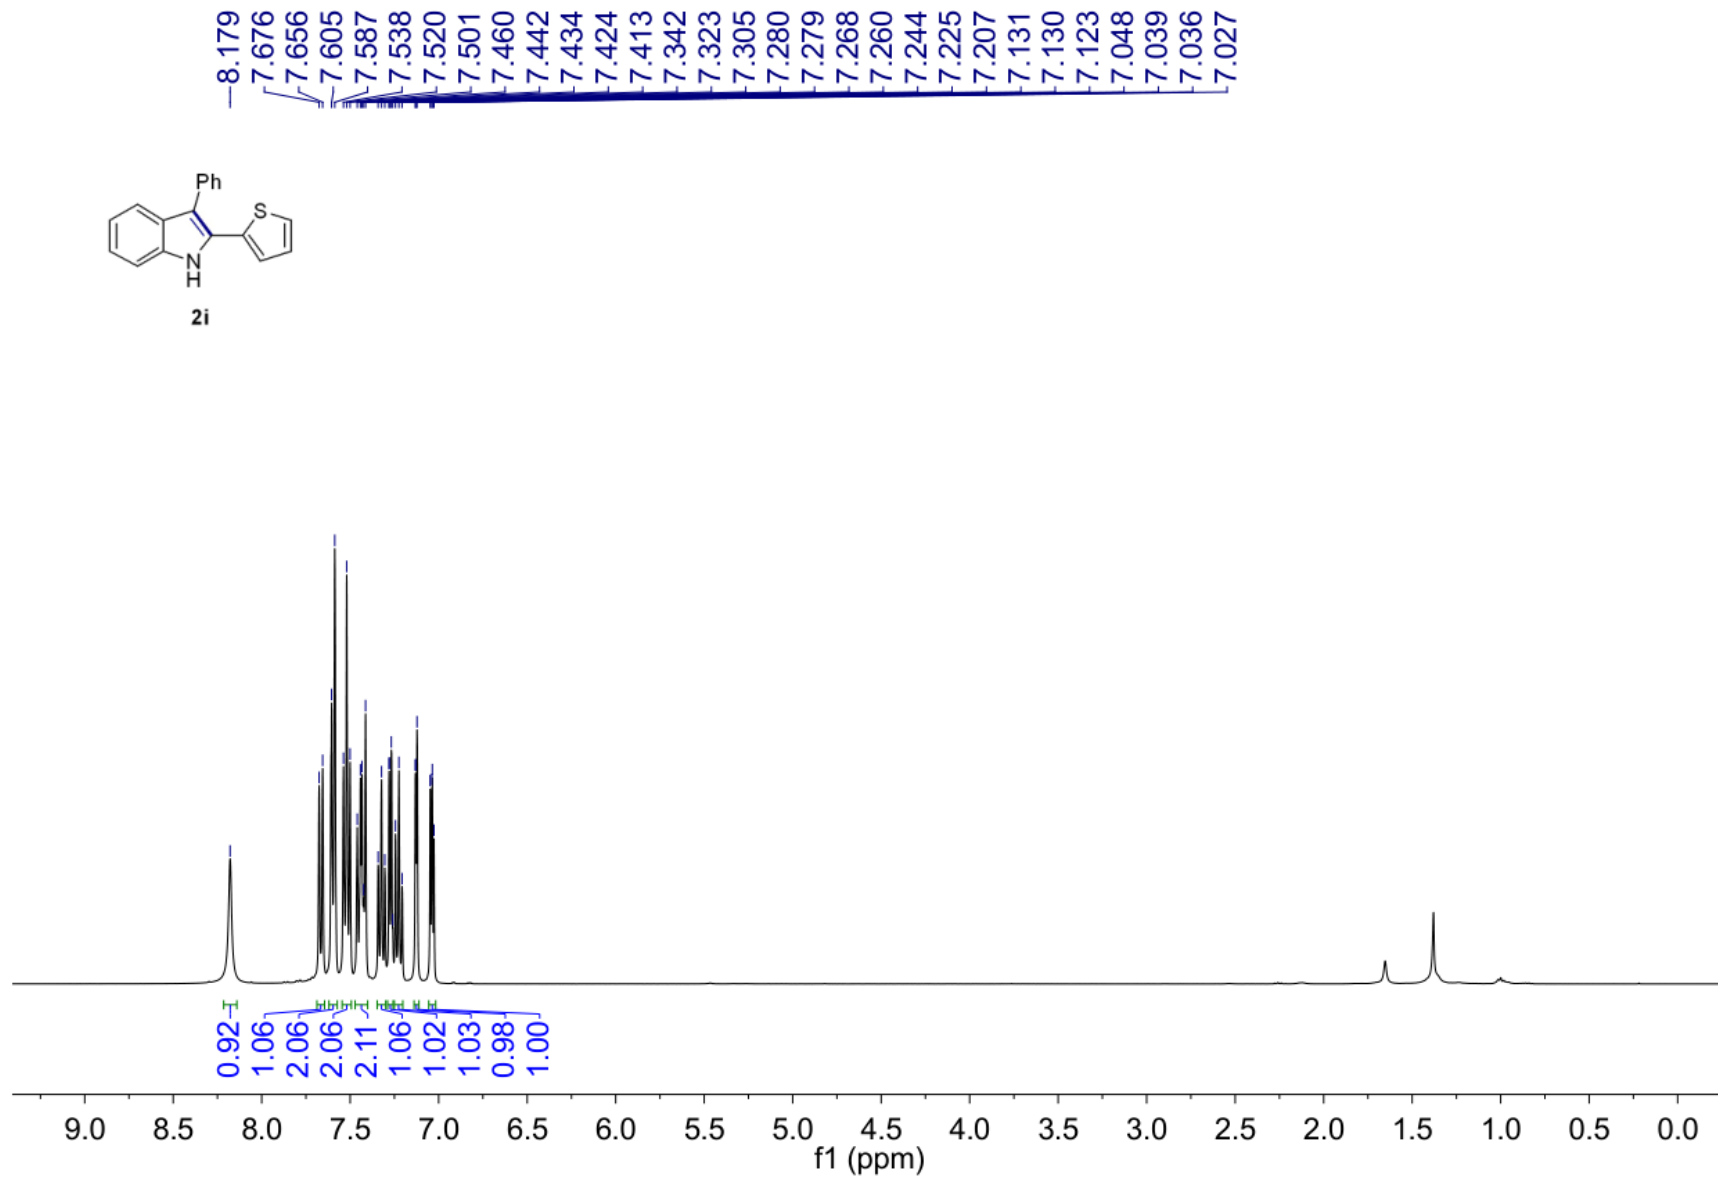

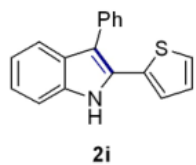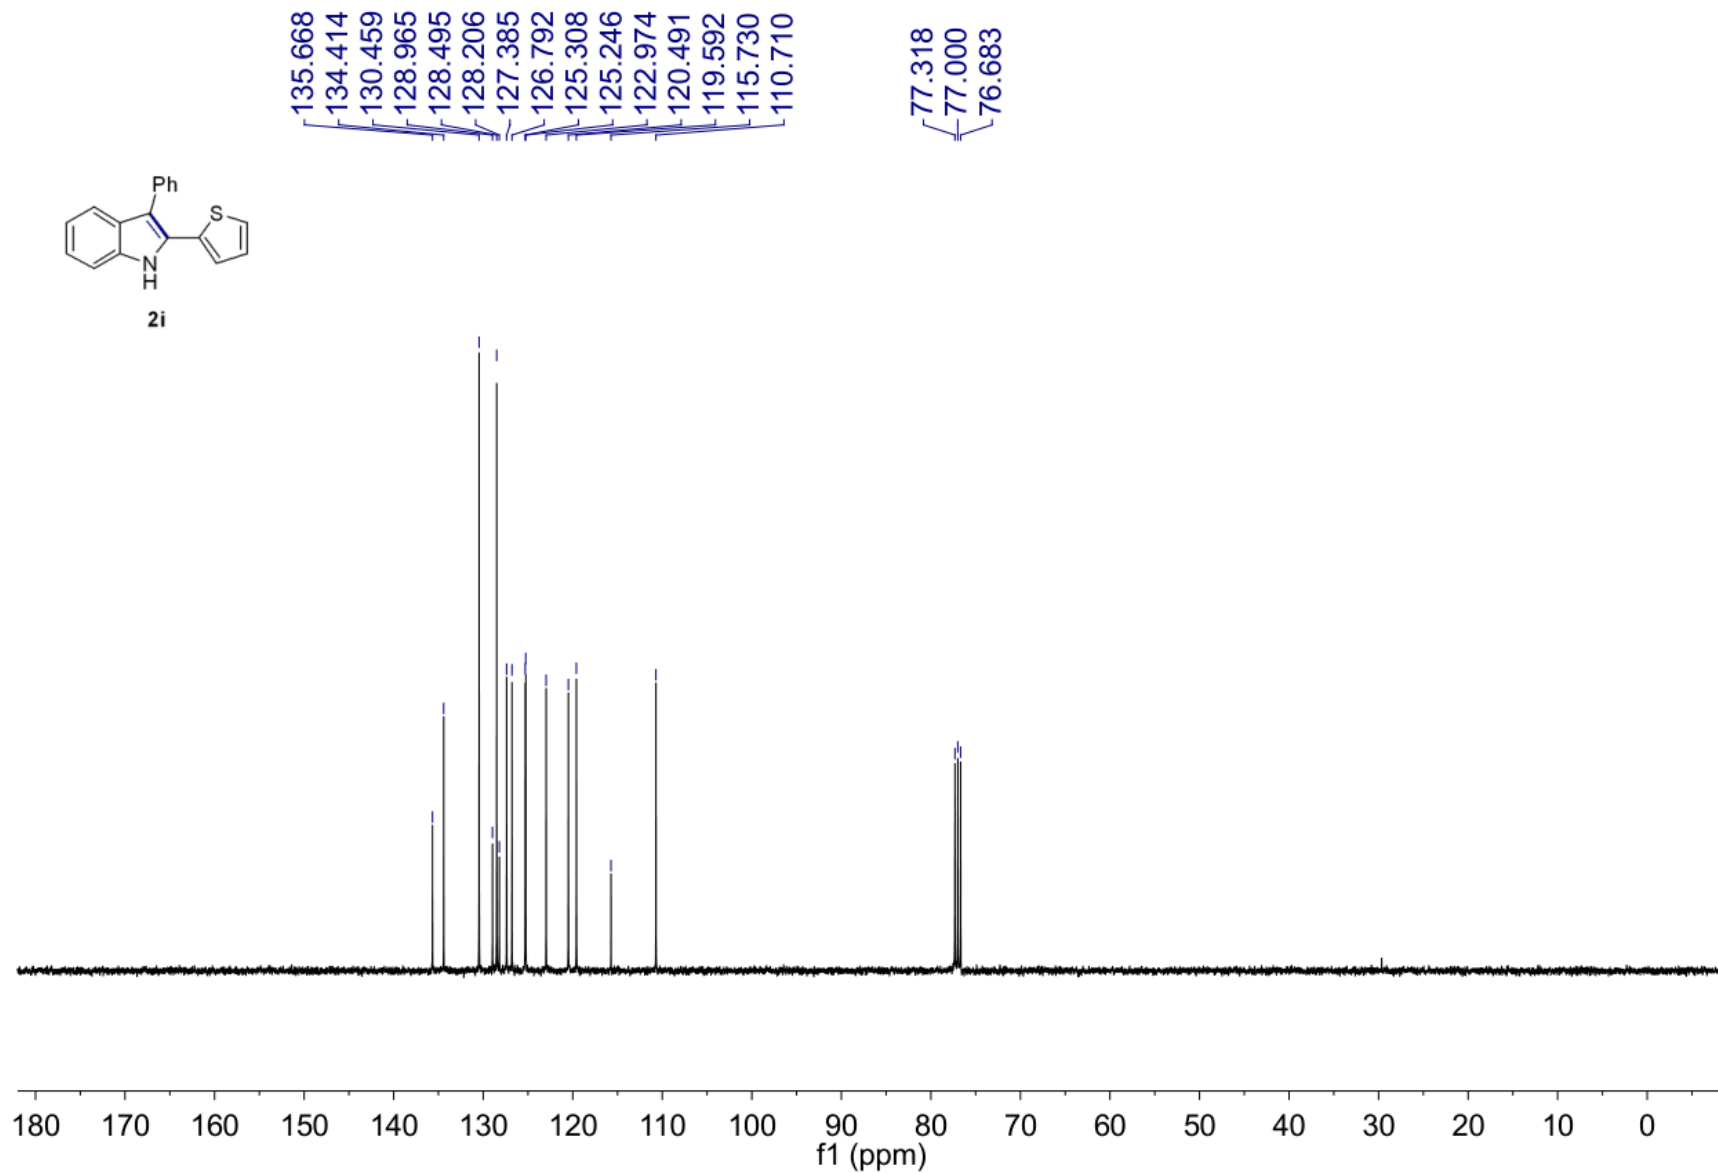

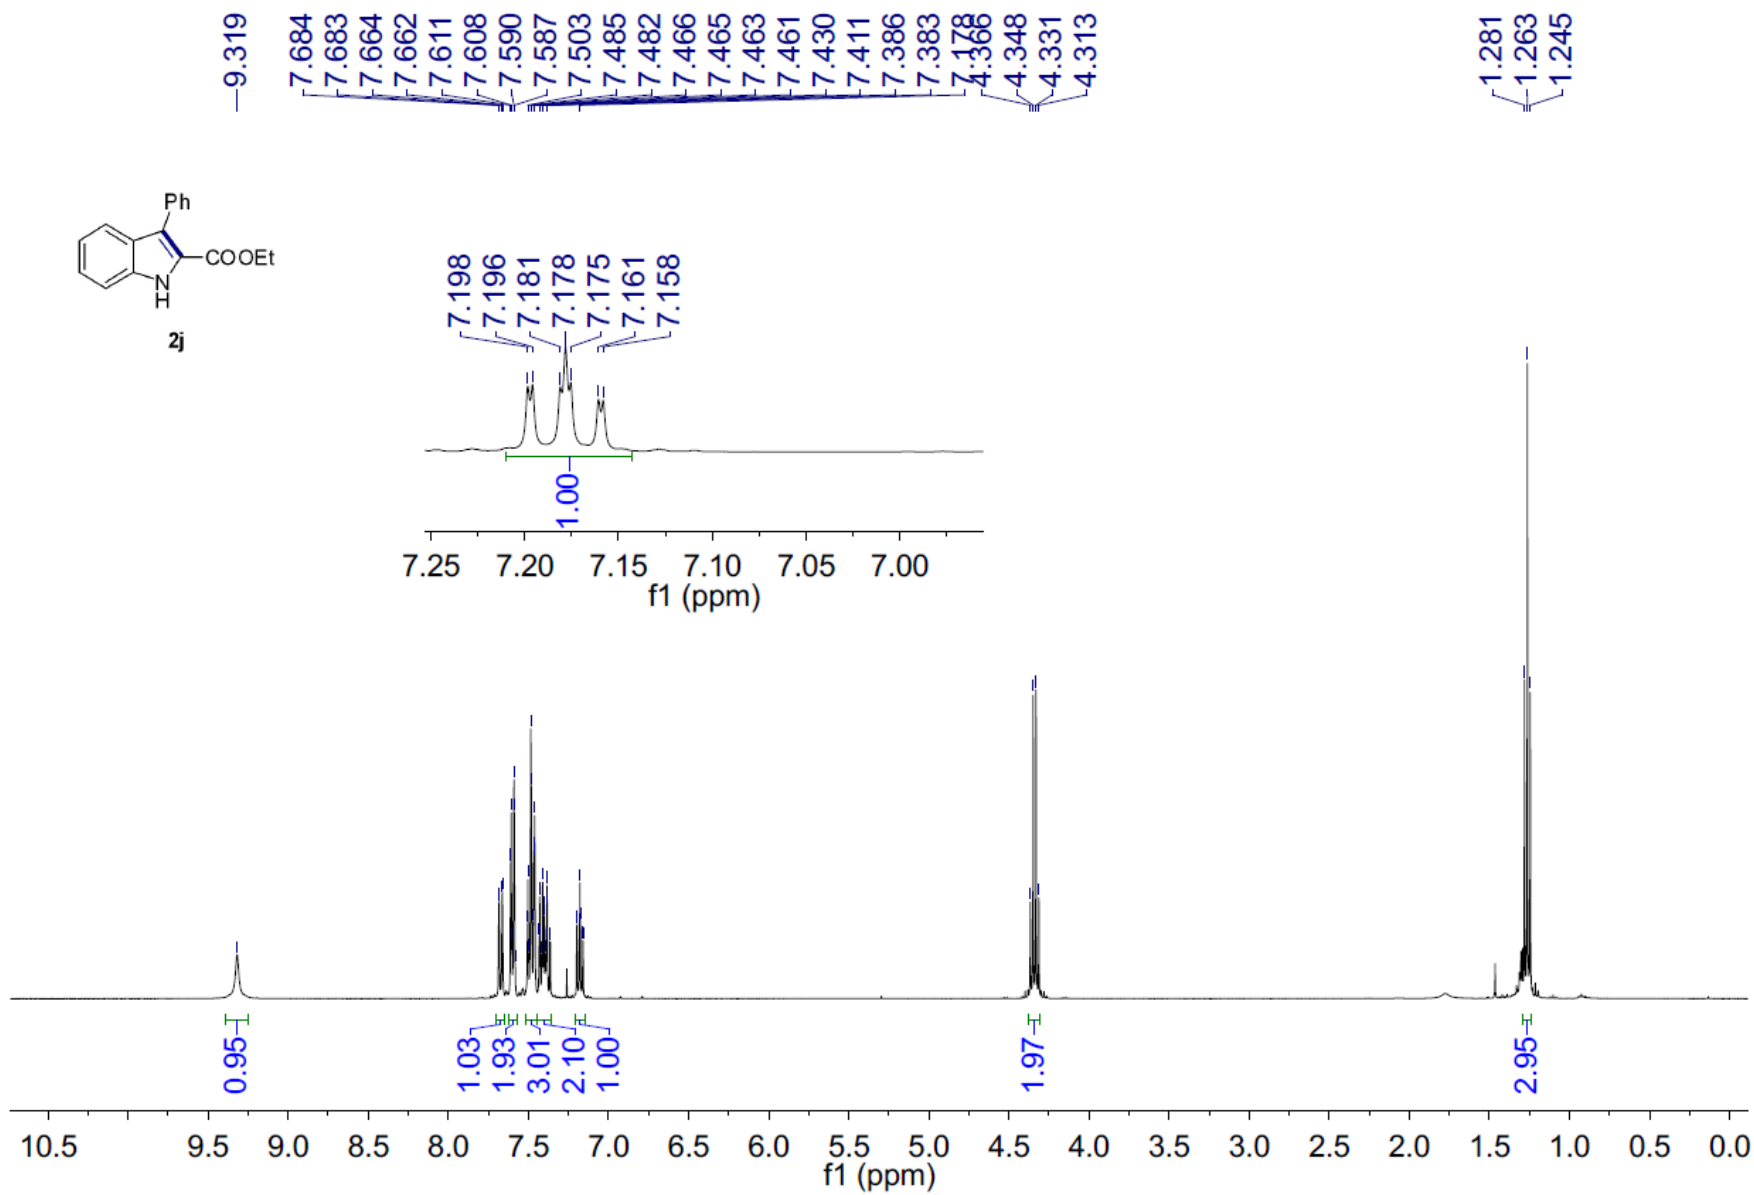

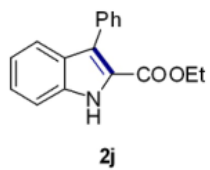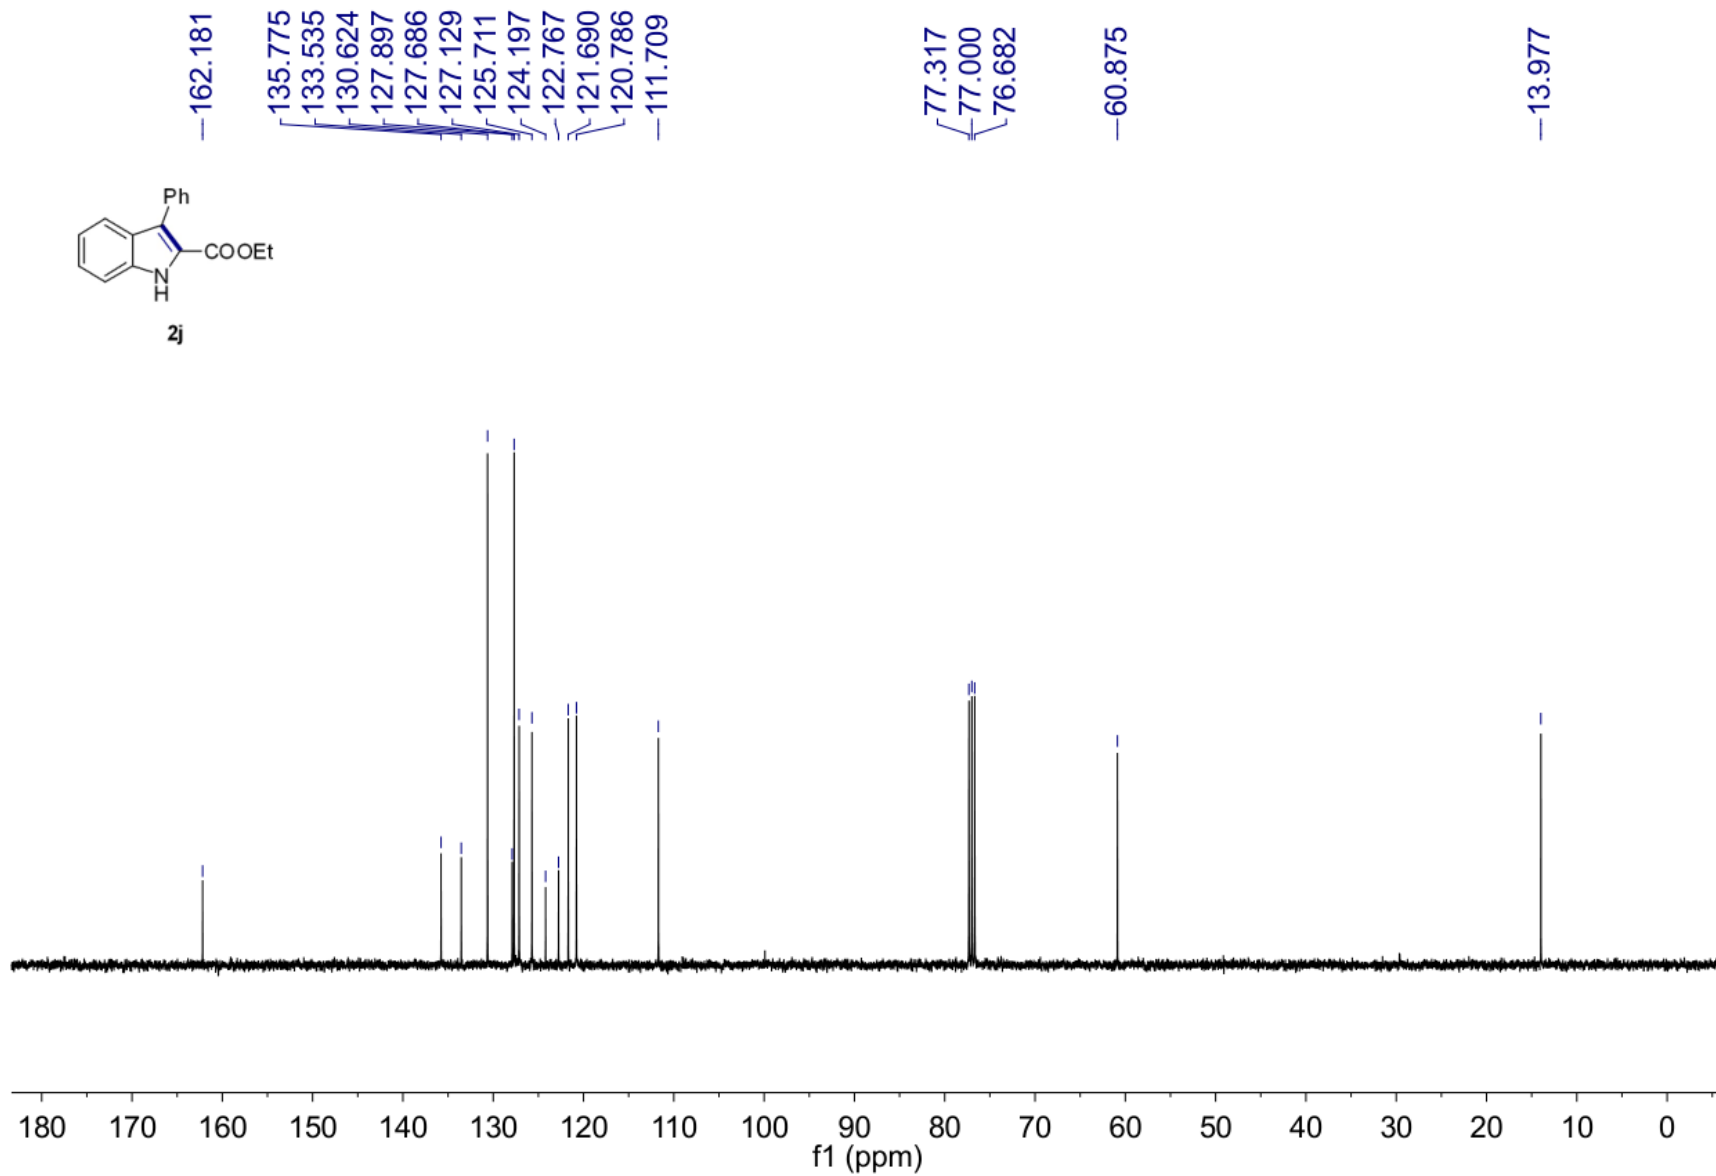

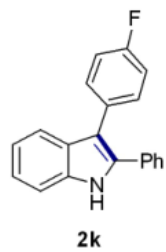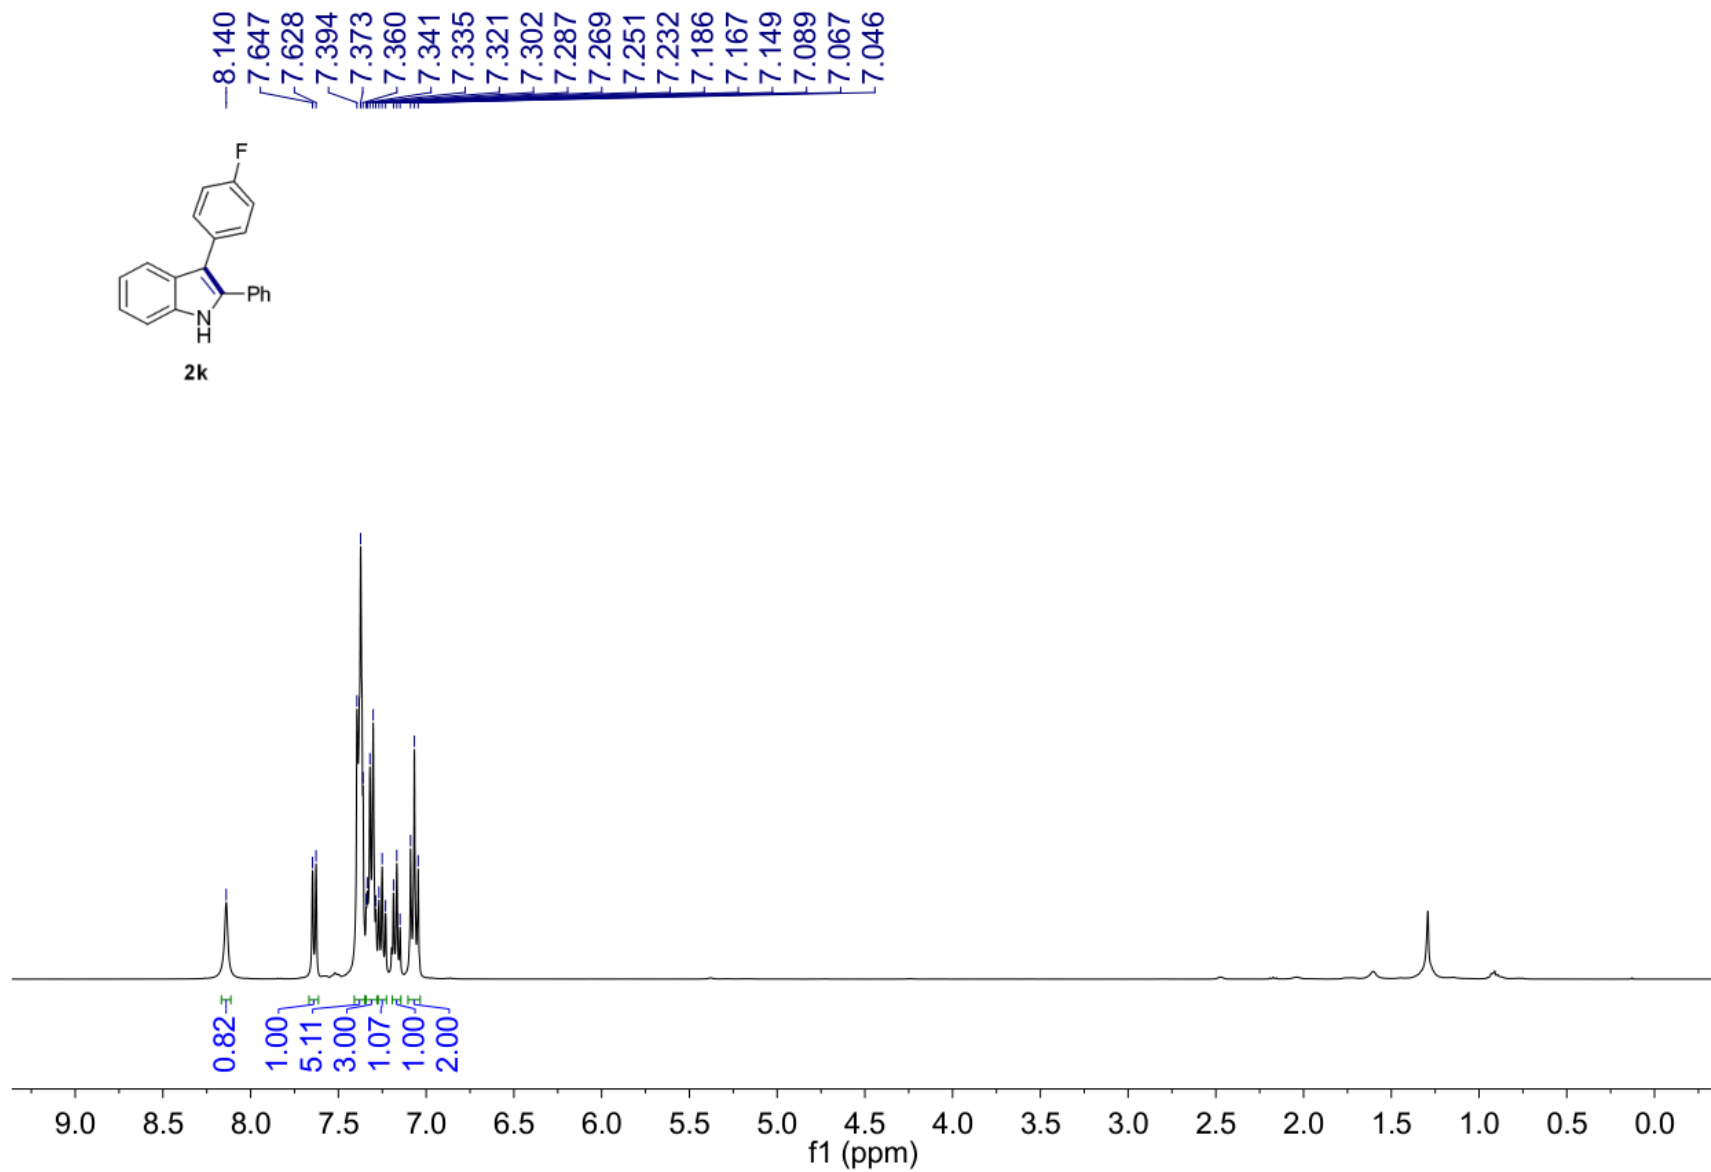



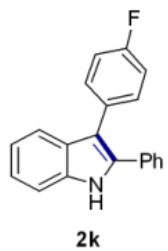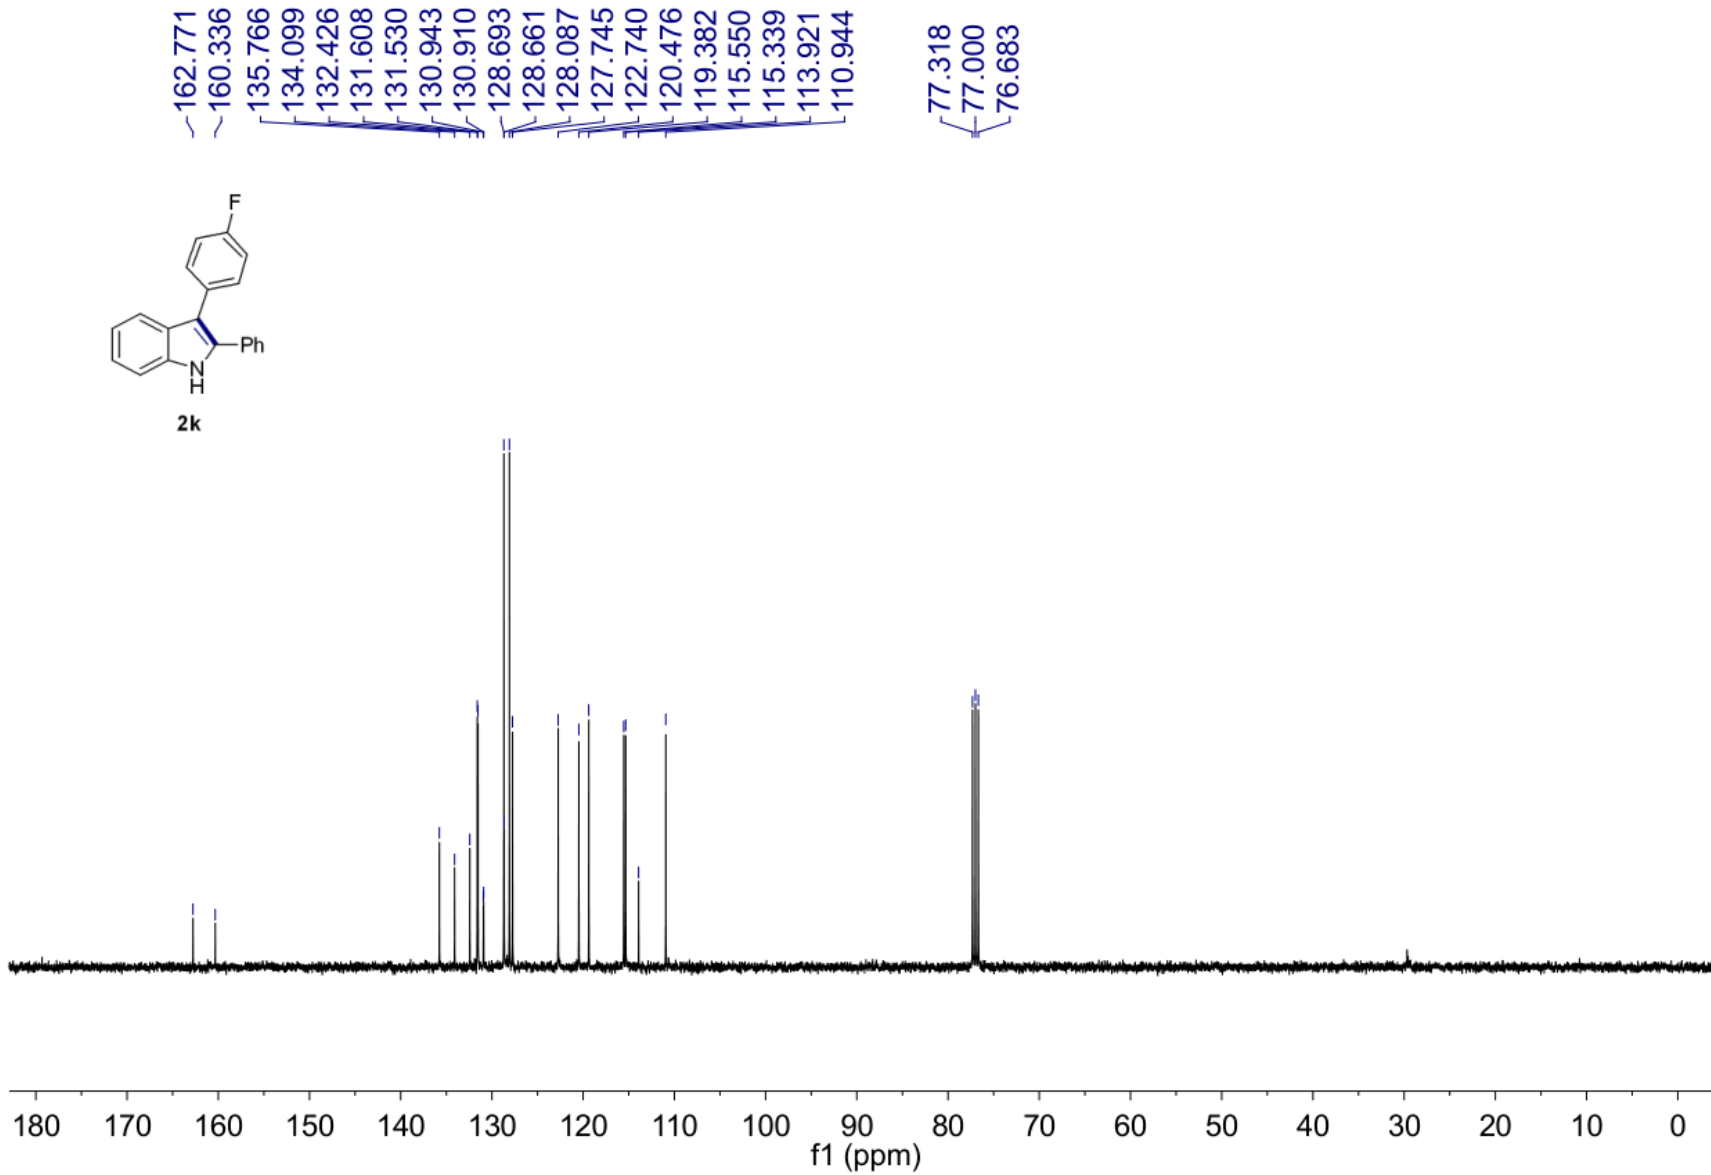

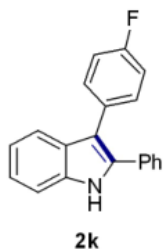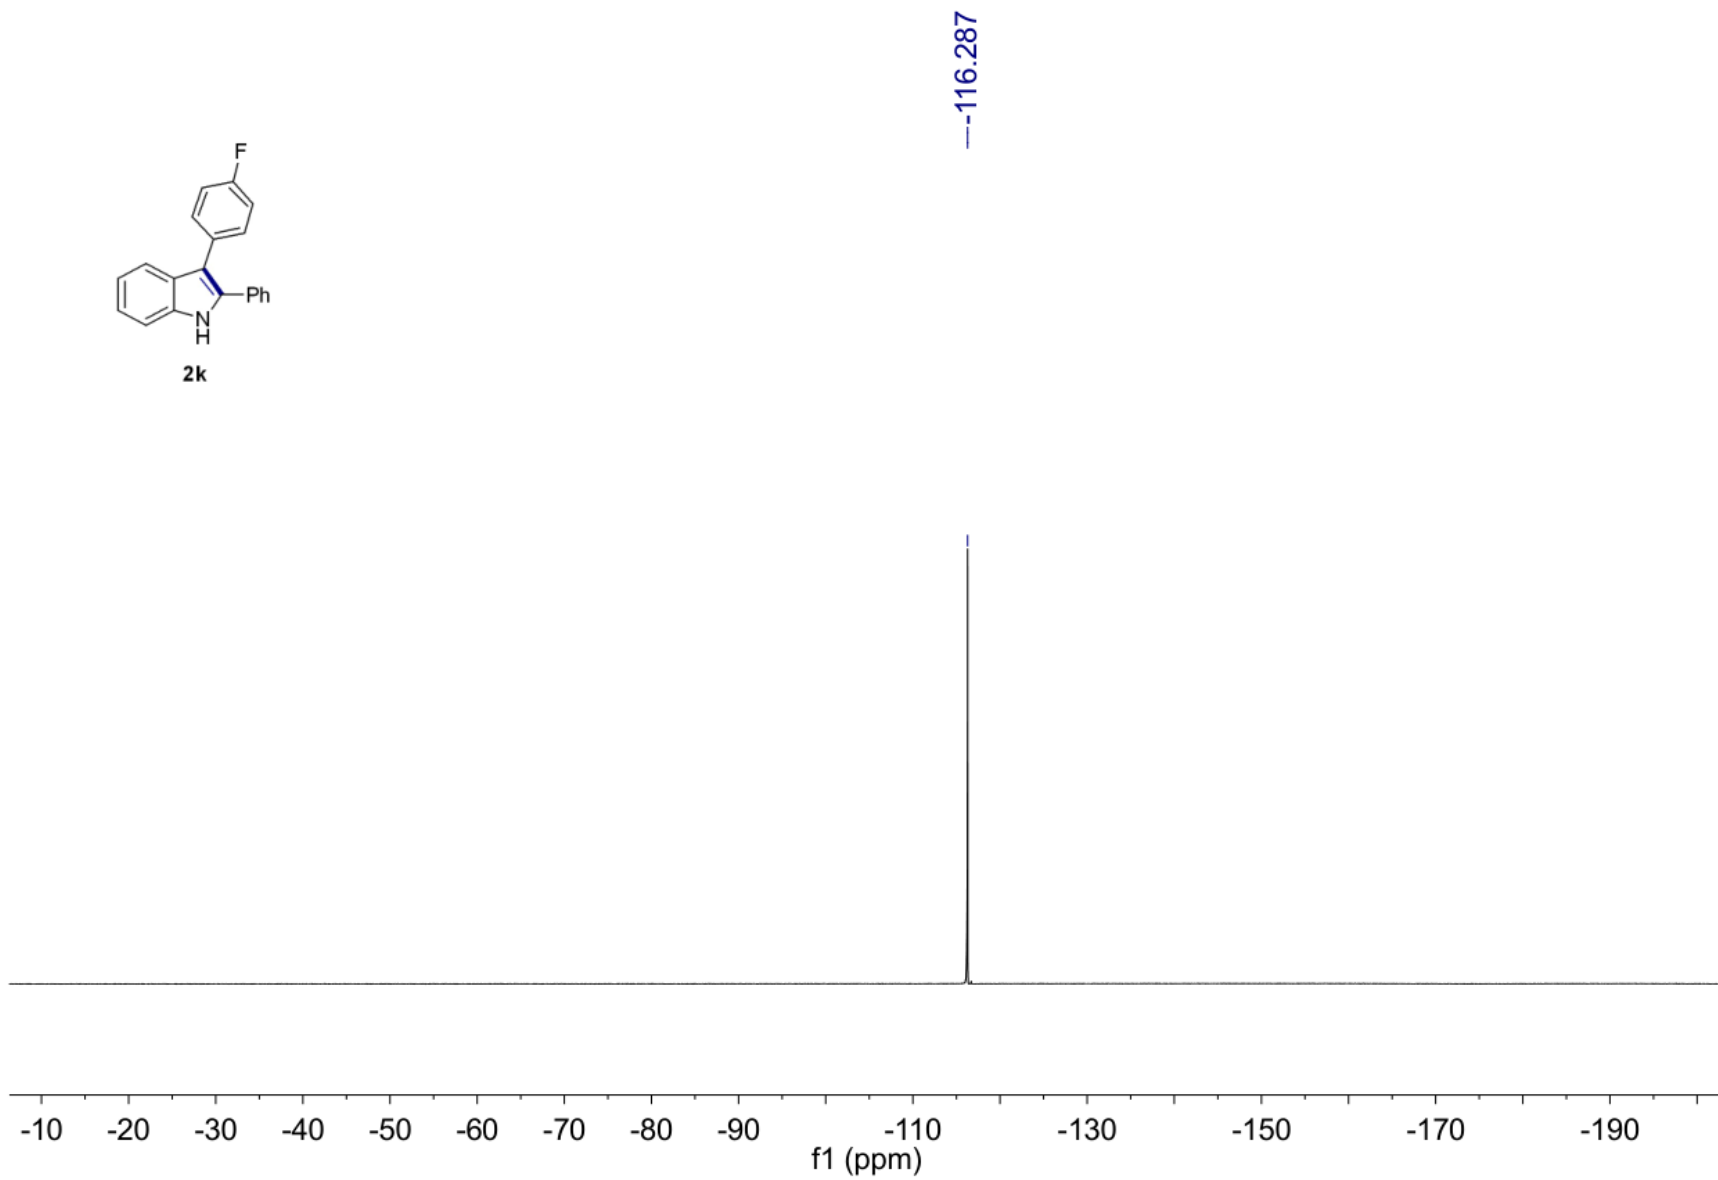

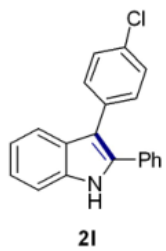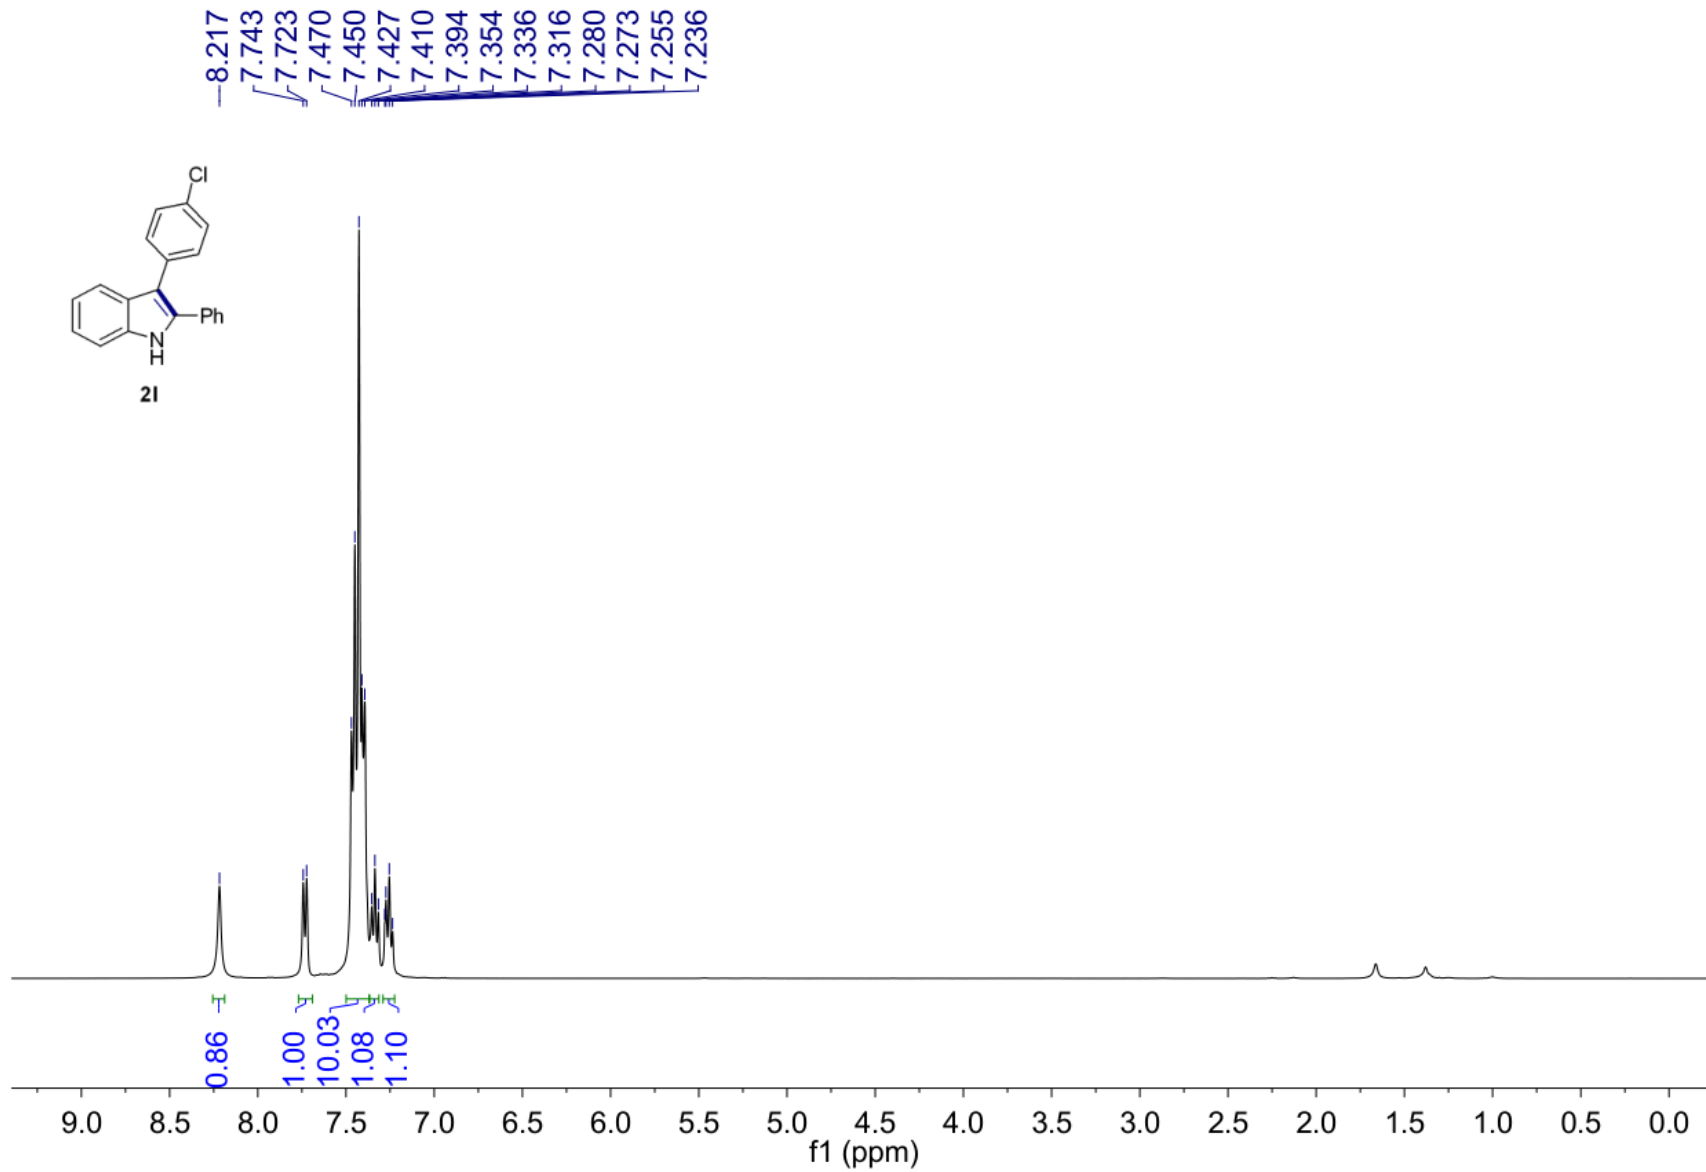

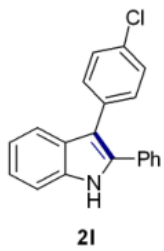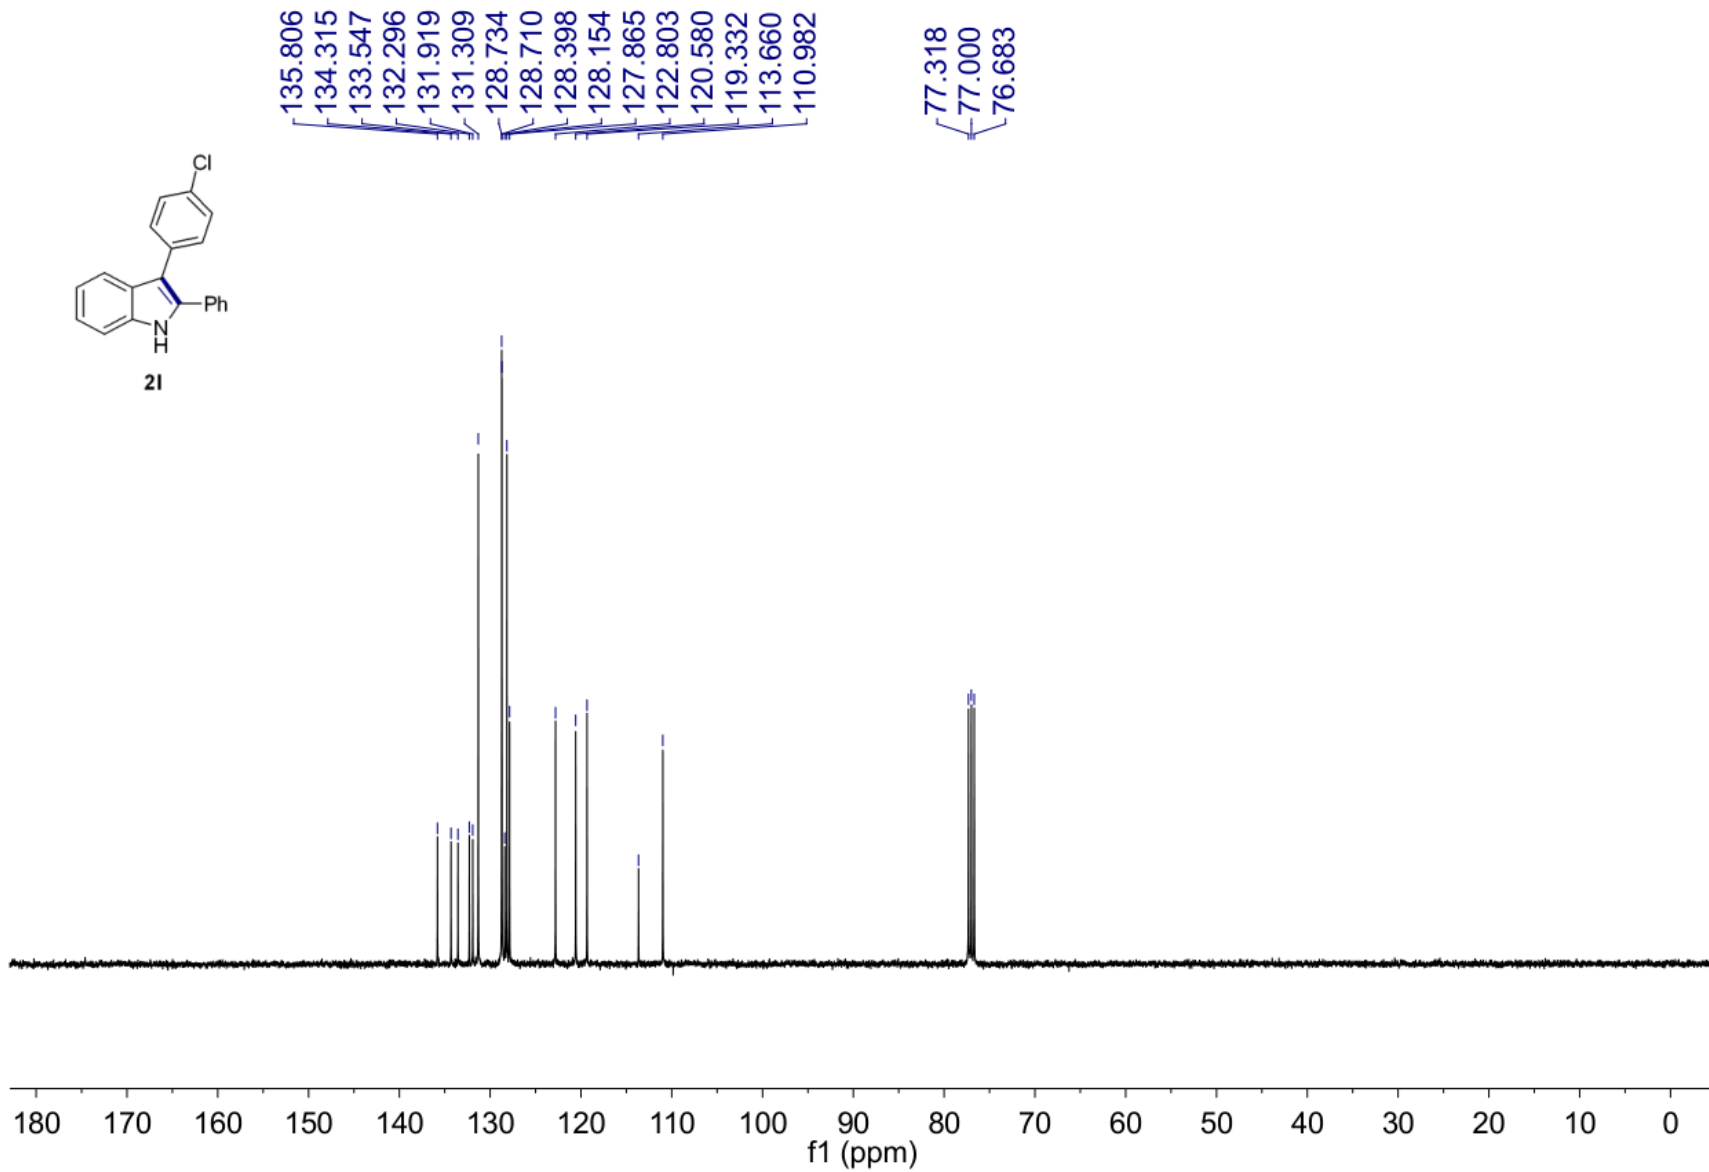

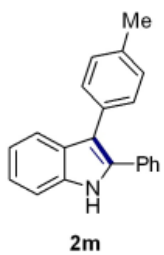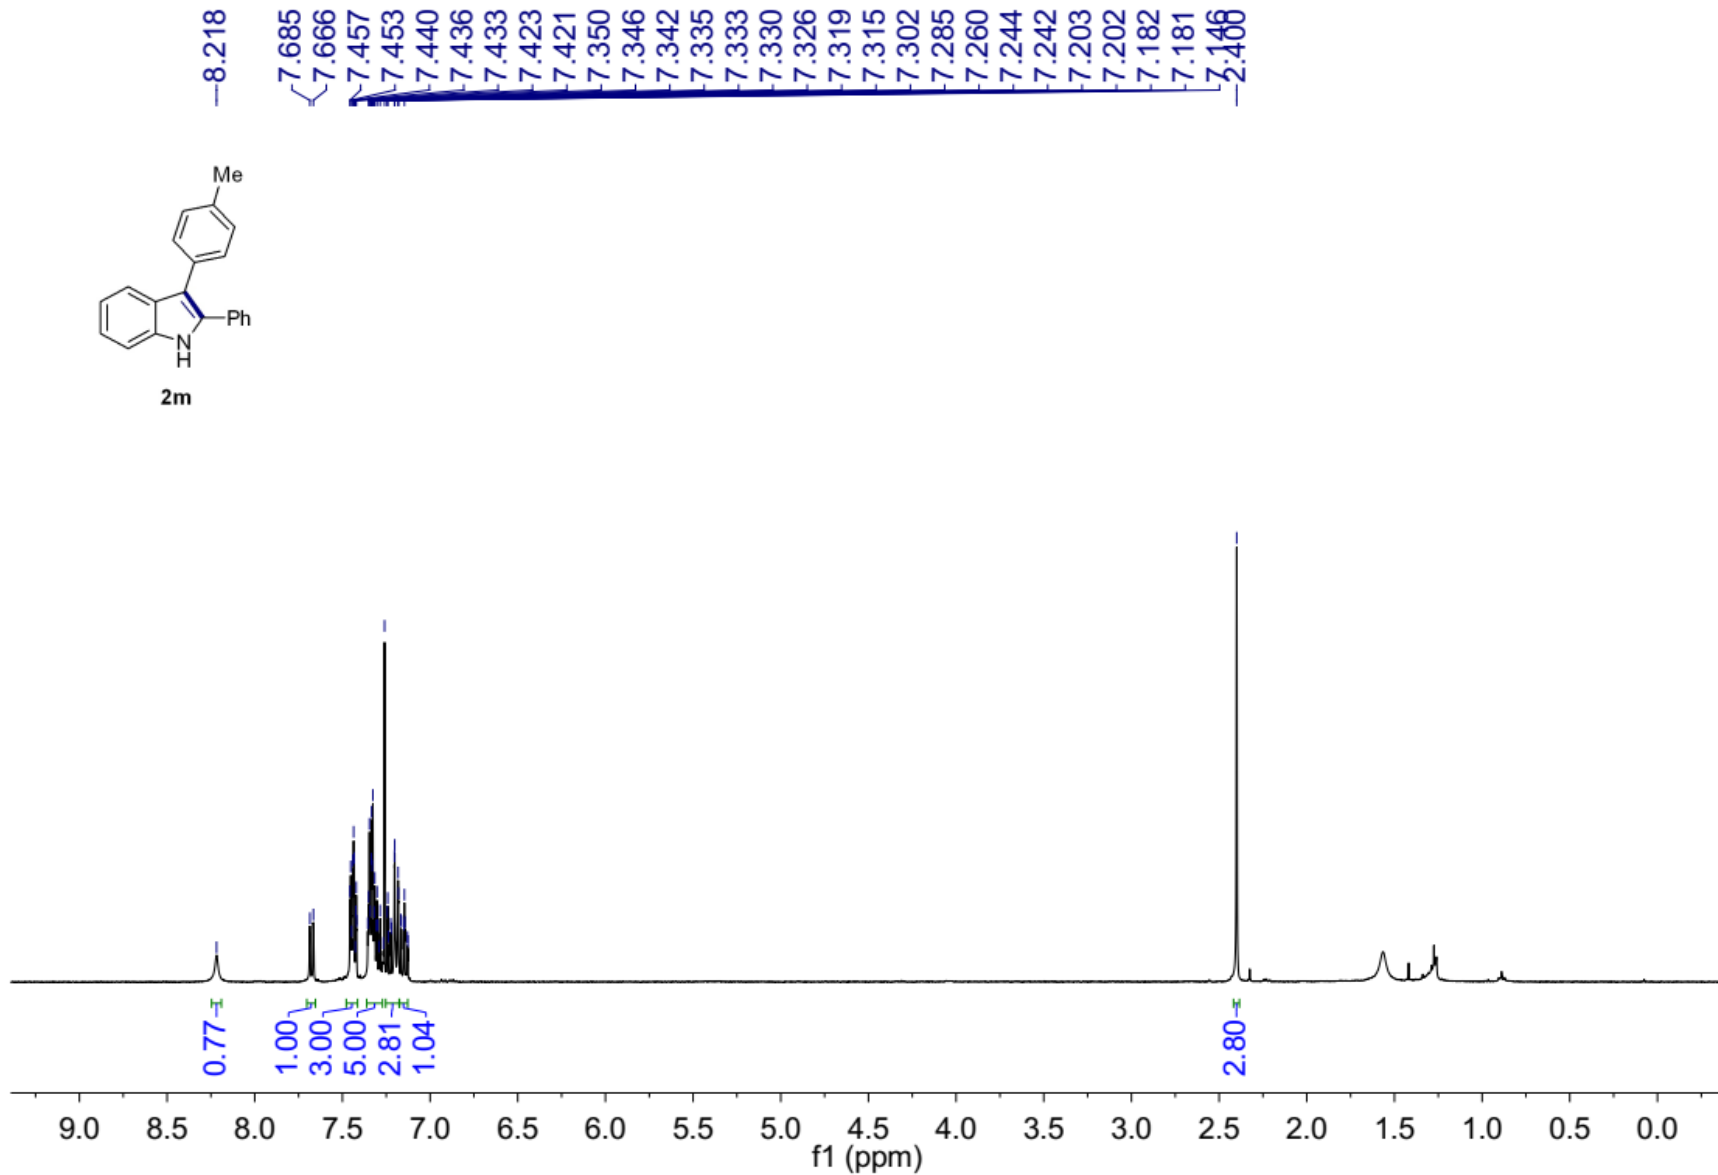

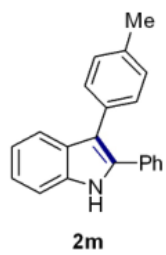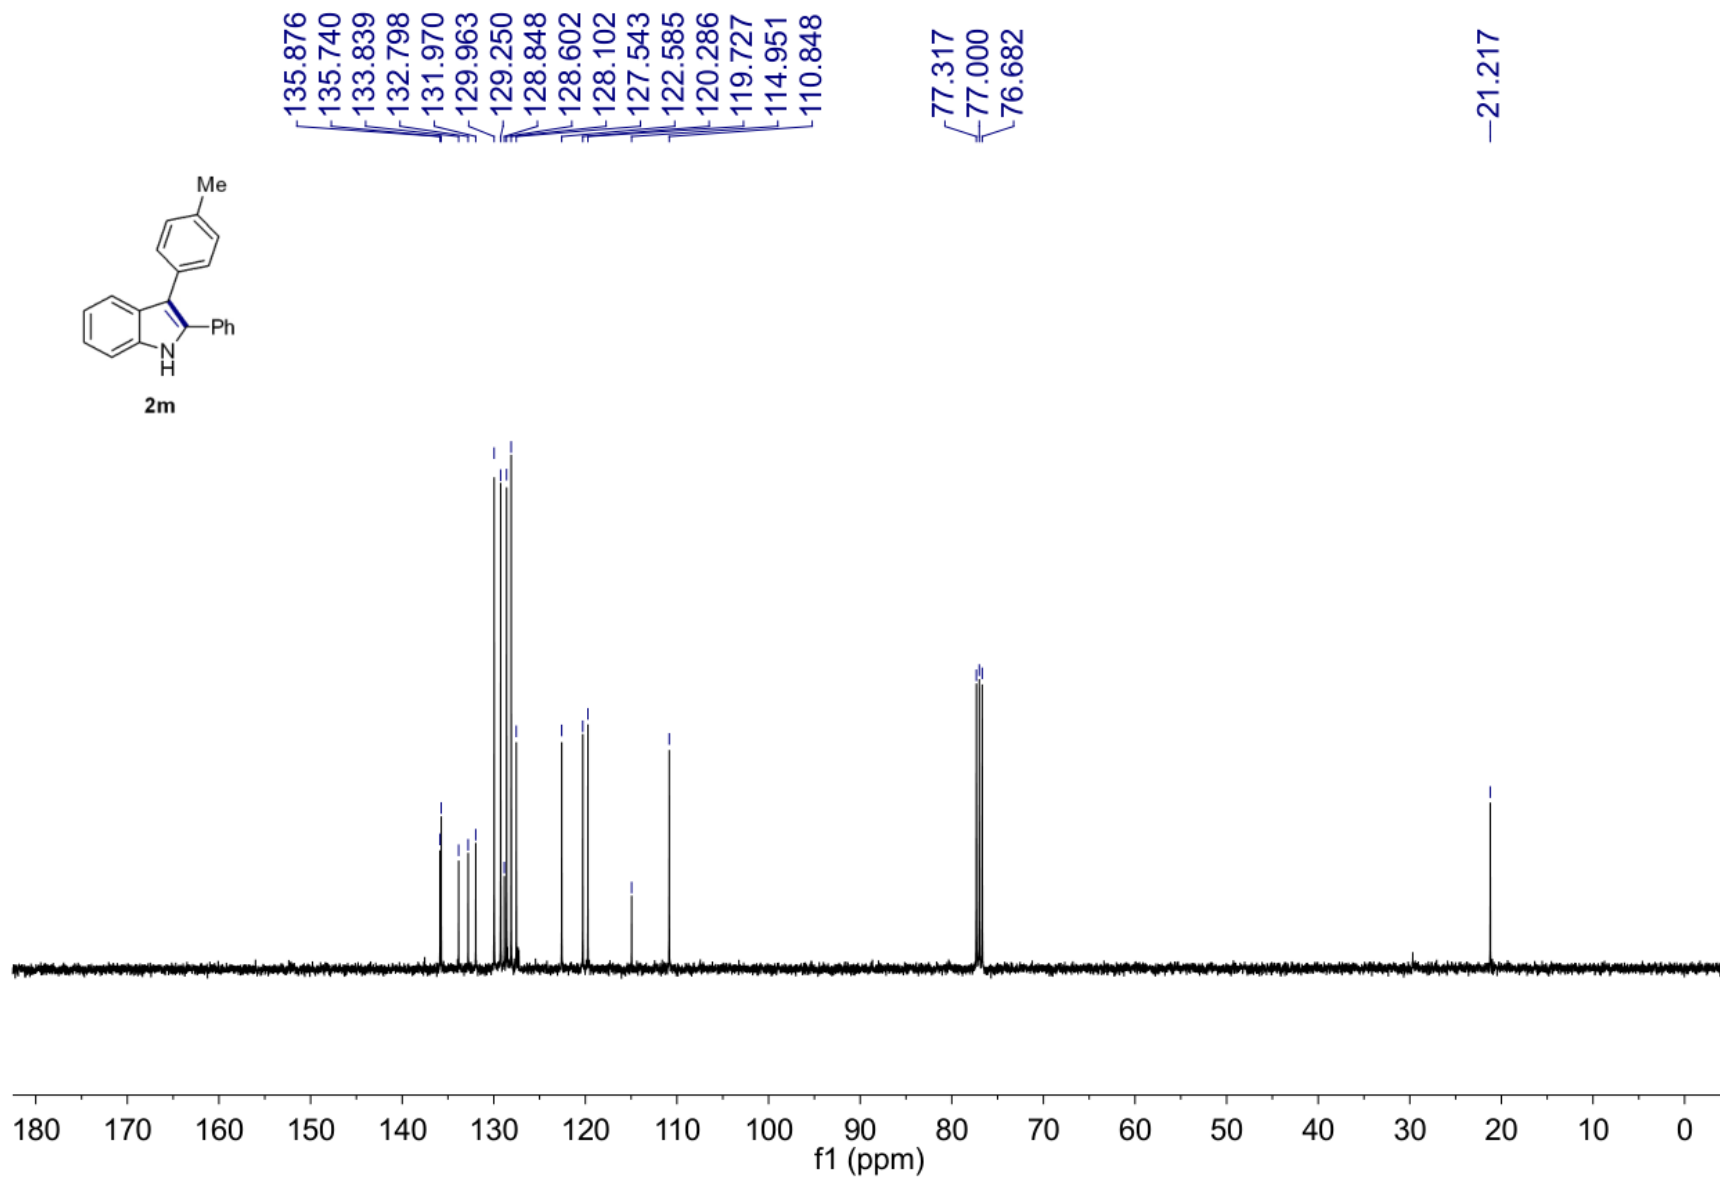

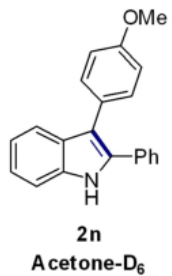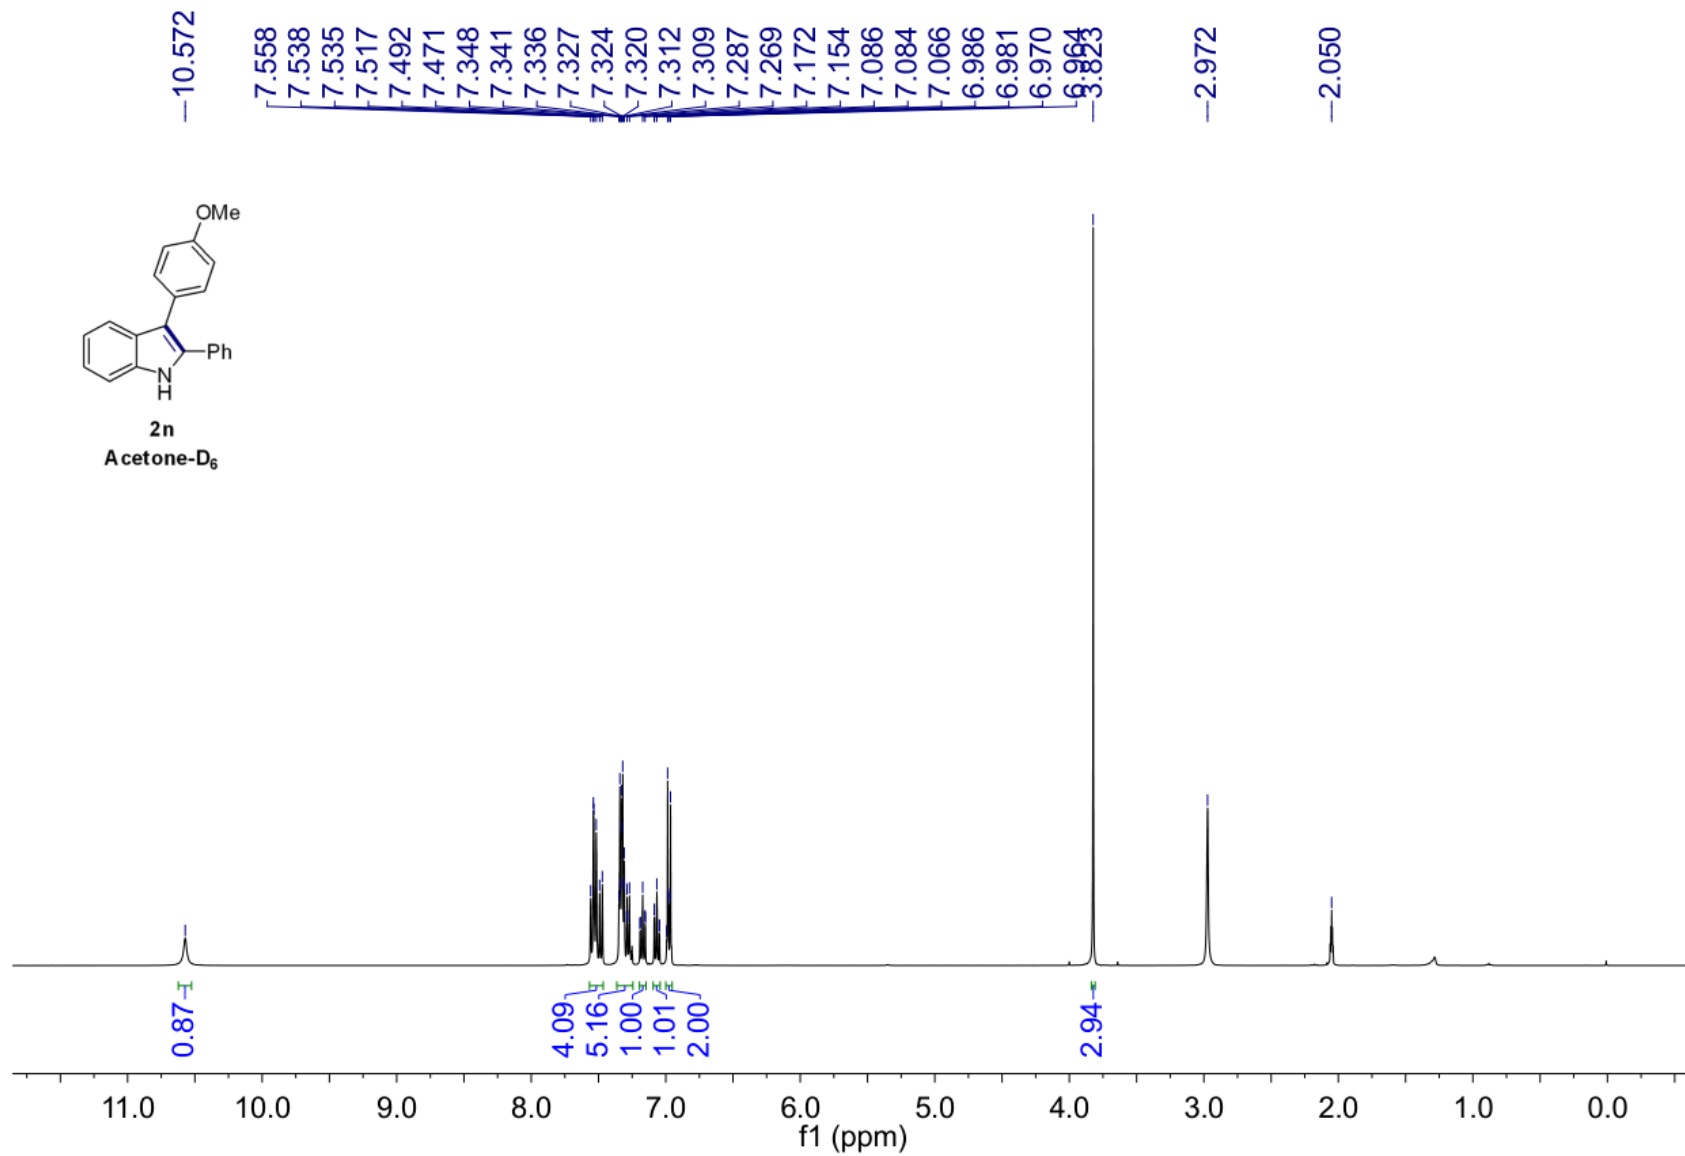

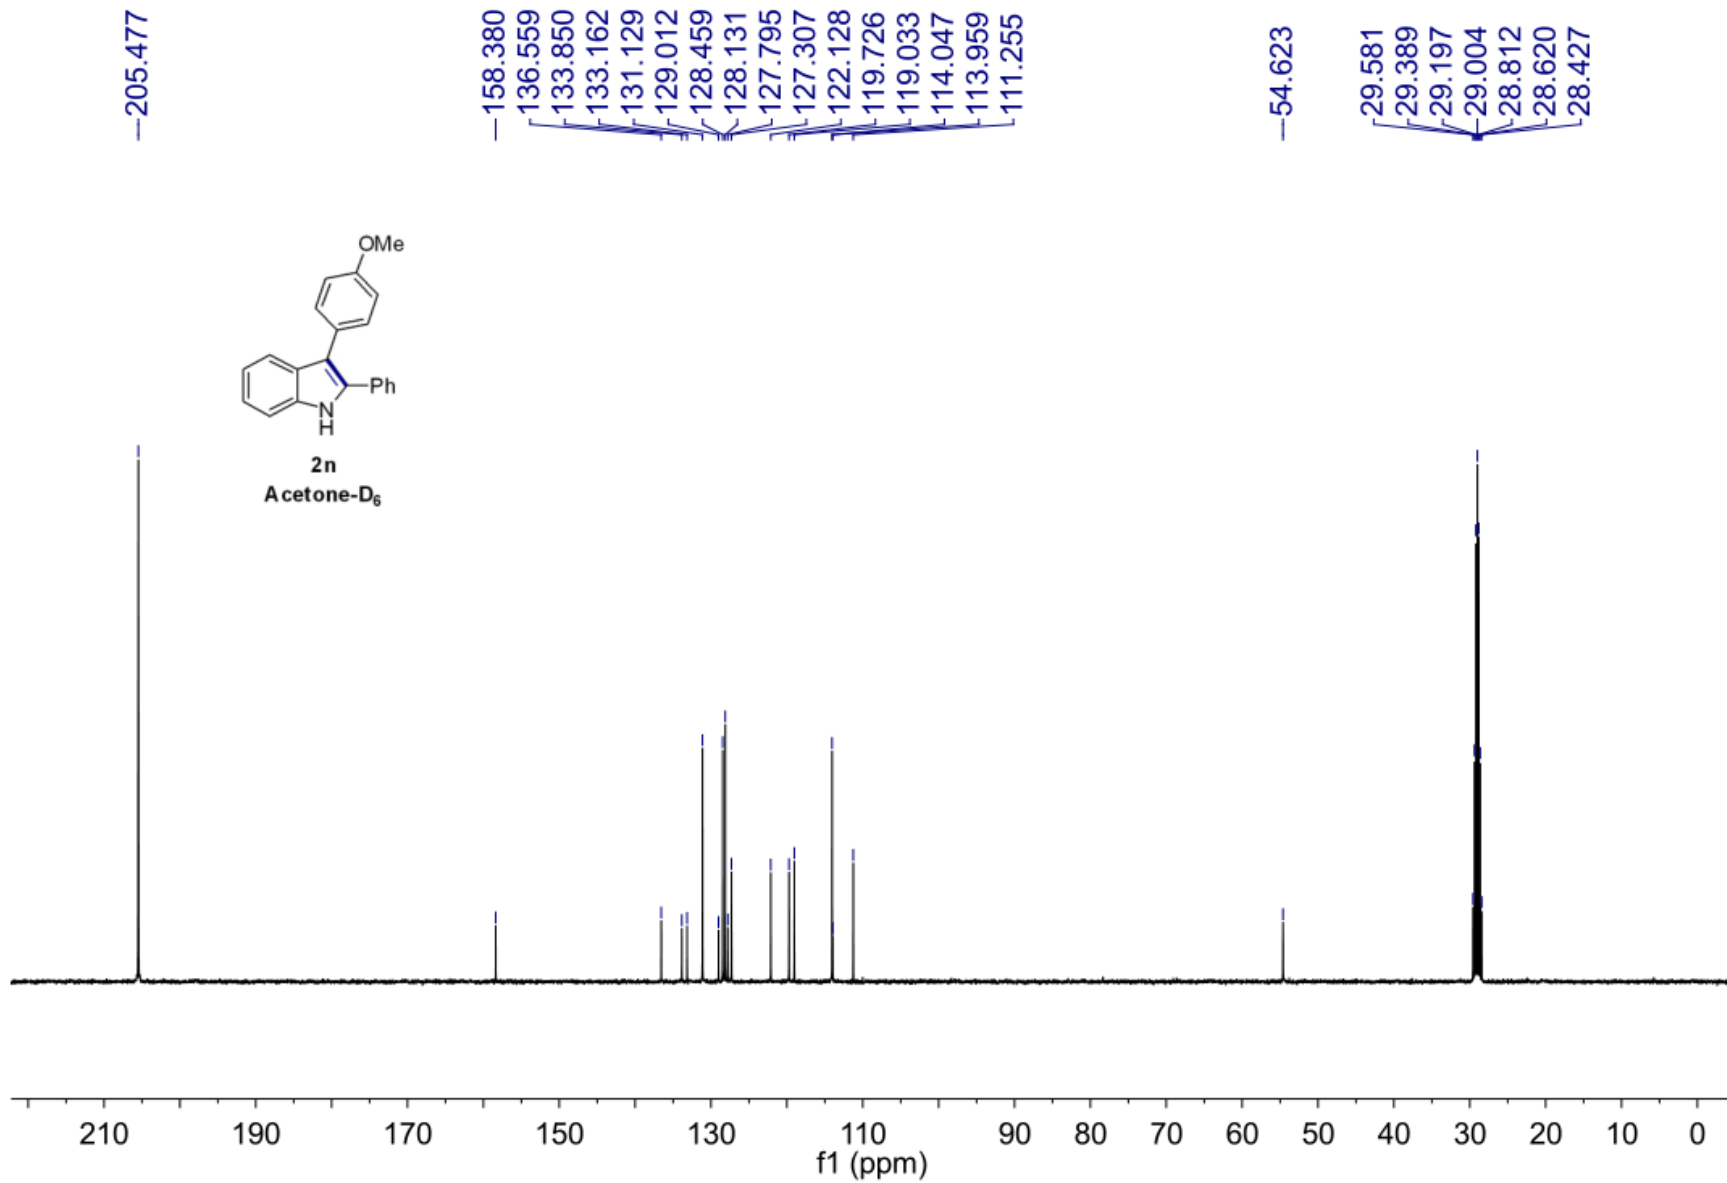



8.230  
7.900  
7.881  
7.574  
7.569  
7.565  
7.554  
7.550  
7.544  
7.457  
7.449  
7.435  
7.430  
7.427  
7.422  
7.417  
7.404  
7.401  
7.388  
7.384  
7.371  
7.359  
7.351  
7.349  
7.333  
7.331  
7.314  
7.311  
7.298  
7.295  
7.278  
7.260  
7.258  
7.167  
7.159  
7.155  
7.146

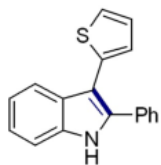

2o

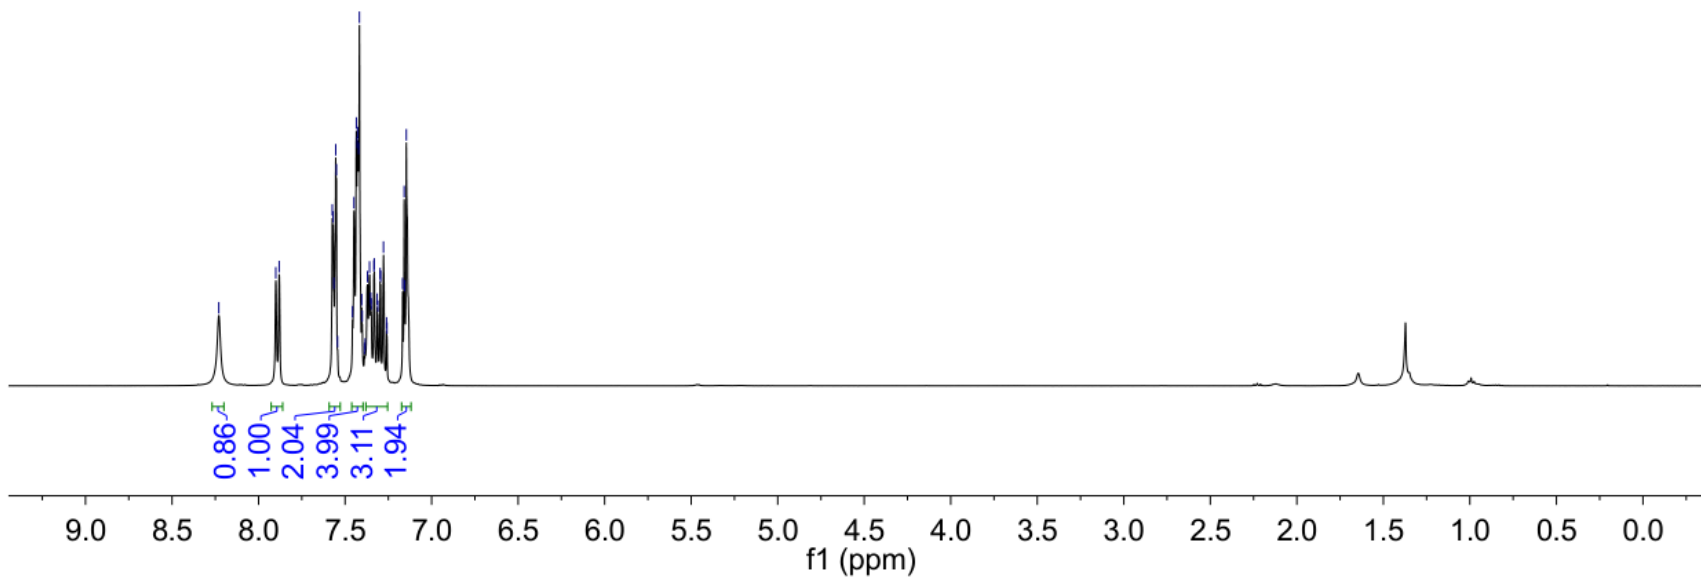

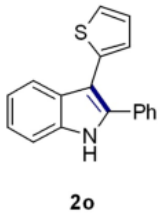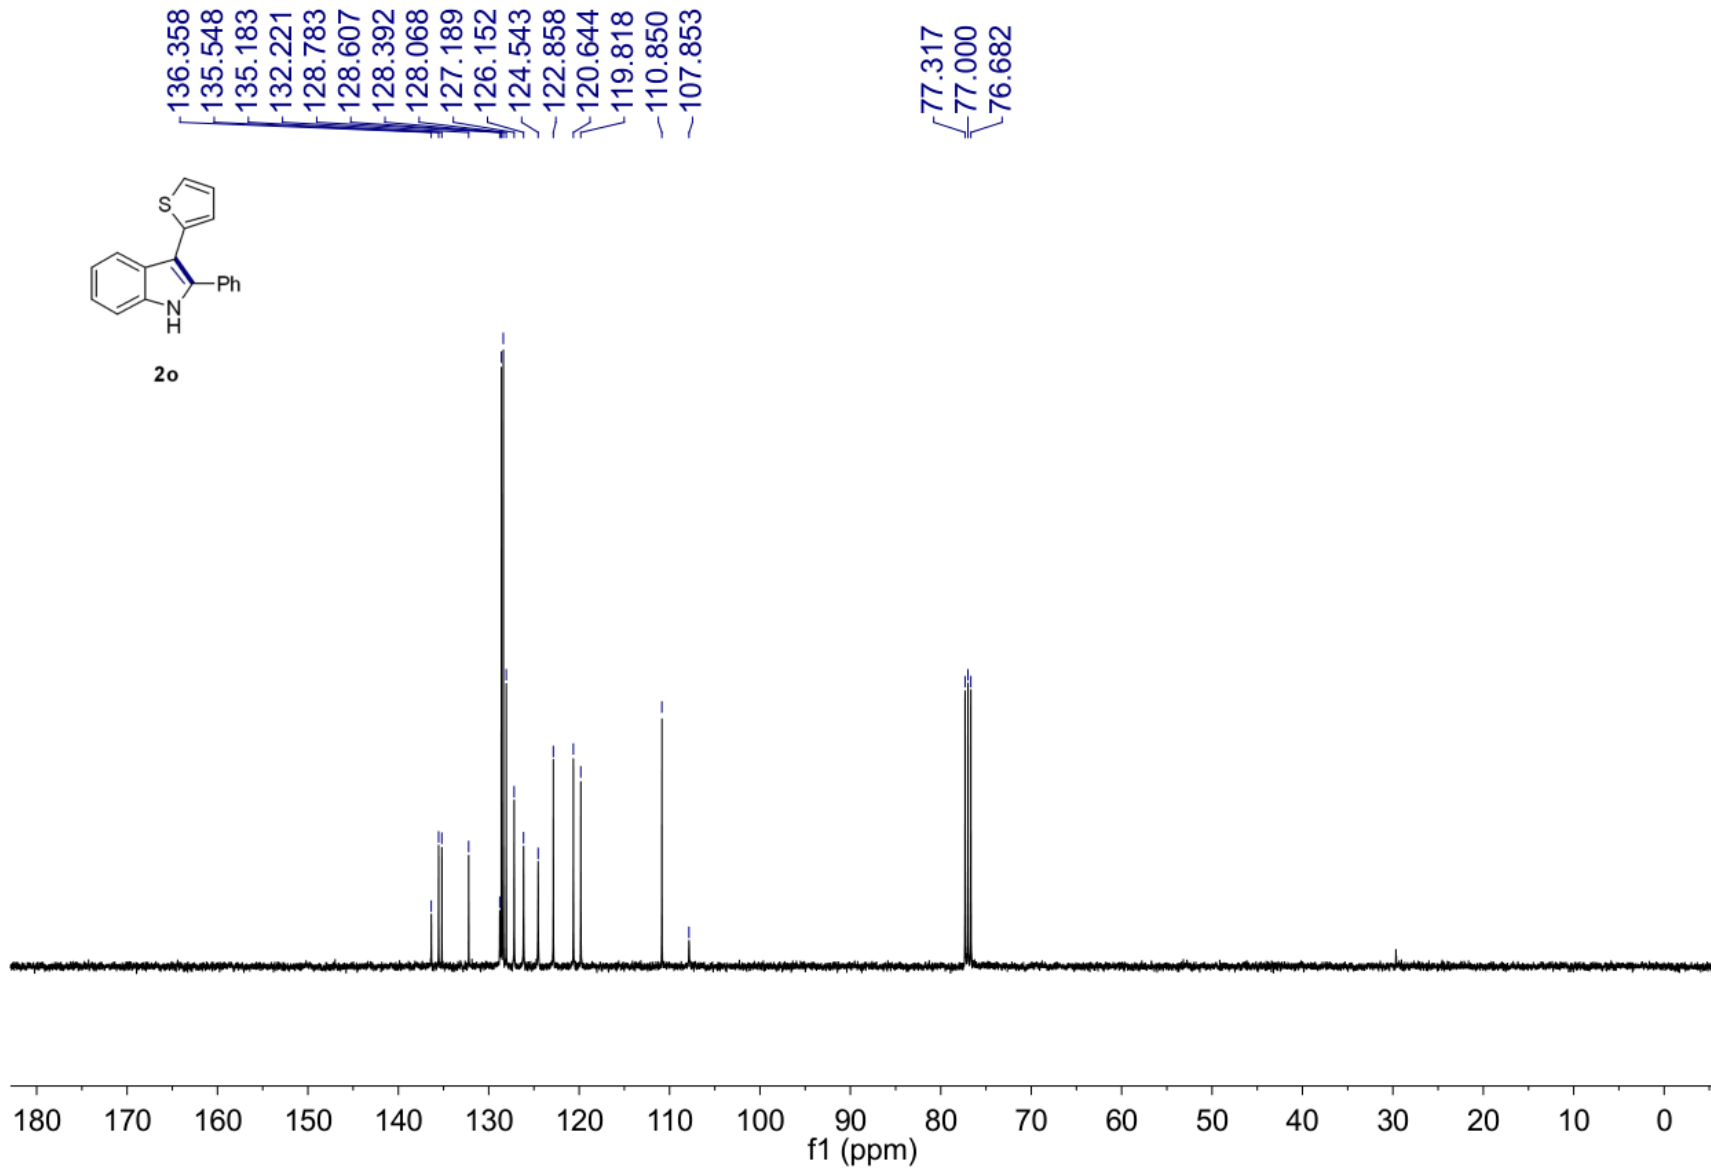

8.009  
7.695  
7.676  
7.644  
7.641  
7.623  
7.558  
7.539  
7.520  
7.440  
7.421  
7.401  
7.306  
7.303  
7.286  
7.269  
7.266  
7.250  
7.247  
7.230  
7.213  
7.211

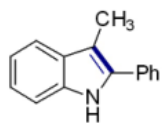

2p

-2.537

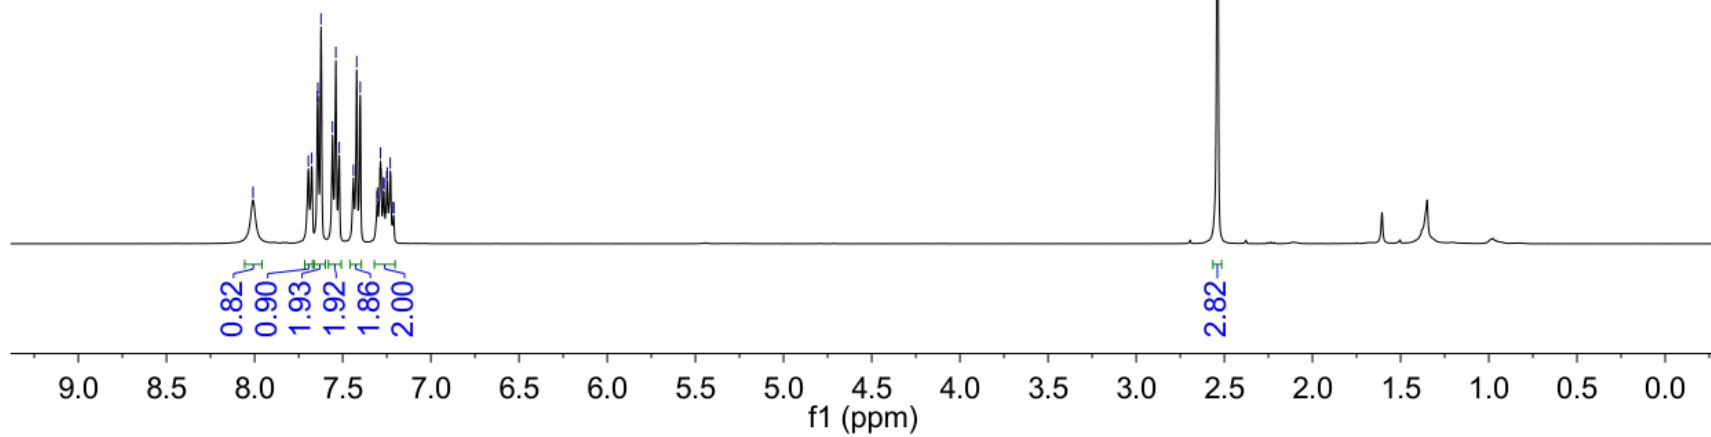

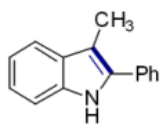

2p

135.812  
133.988  
133.311  
130.005  
128.757  
127.701  
127.264  
122.271  
119.493  
118.944  
110.646  
108.658

77.318  
77.000  
76.683

9.603

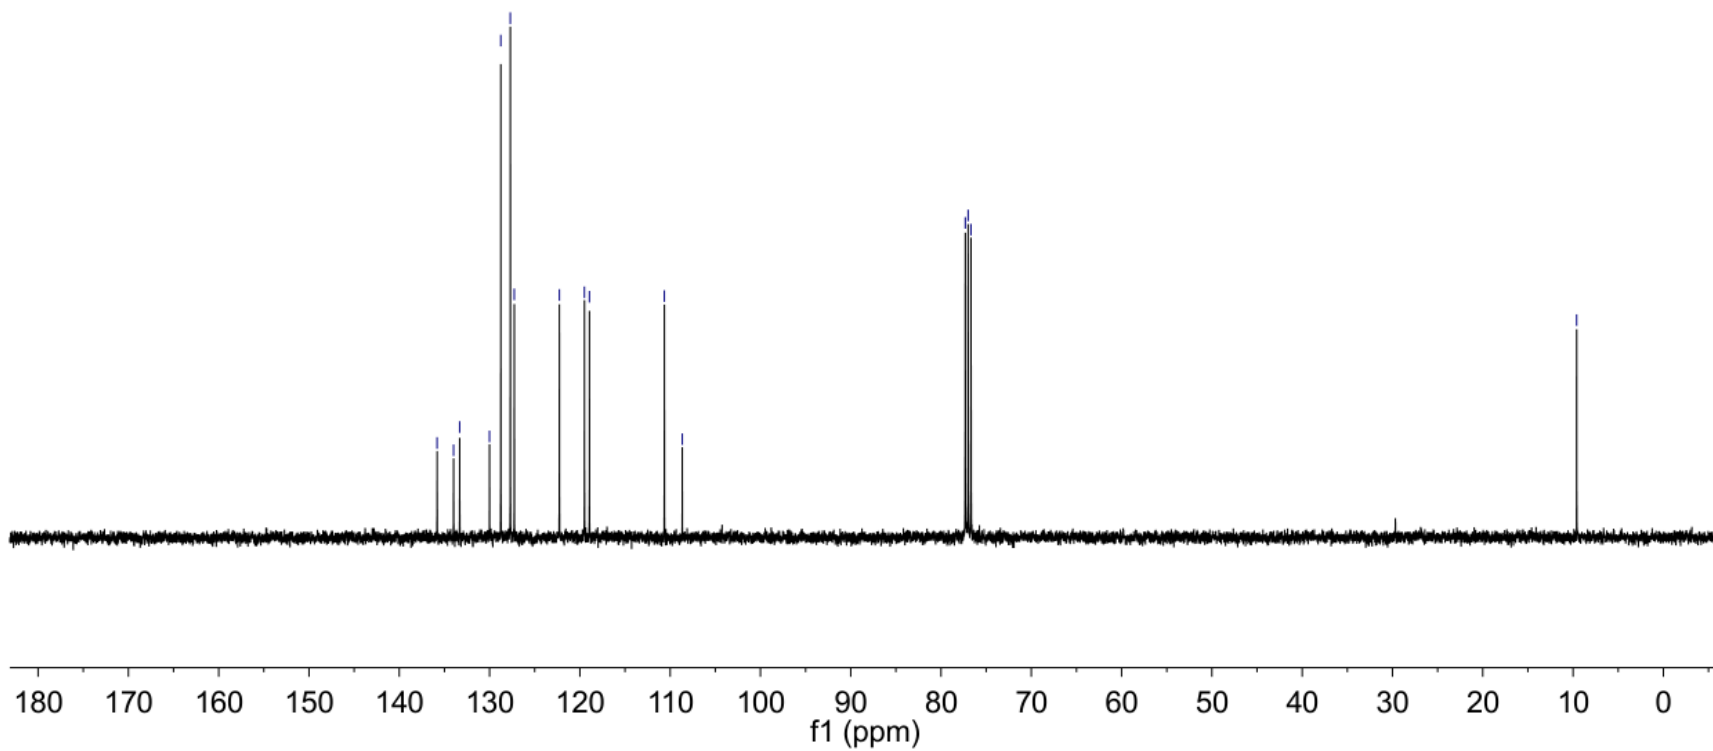

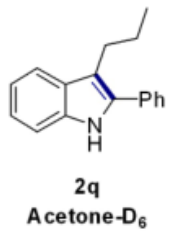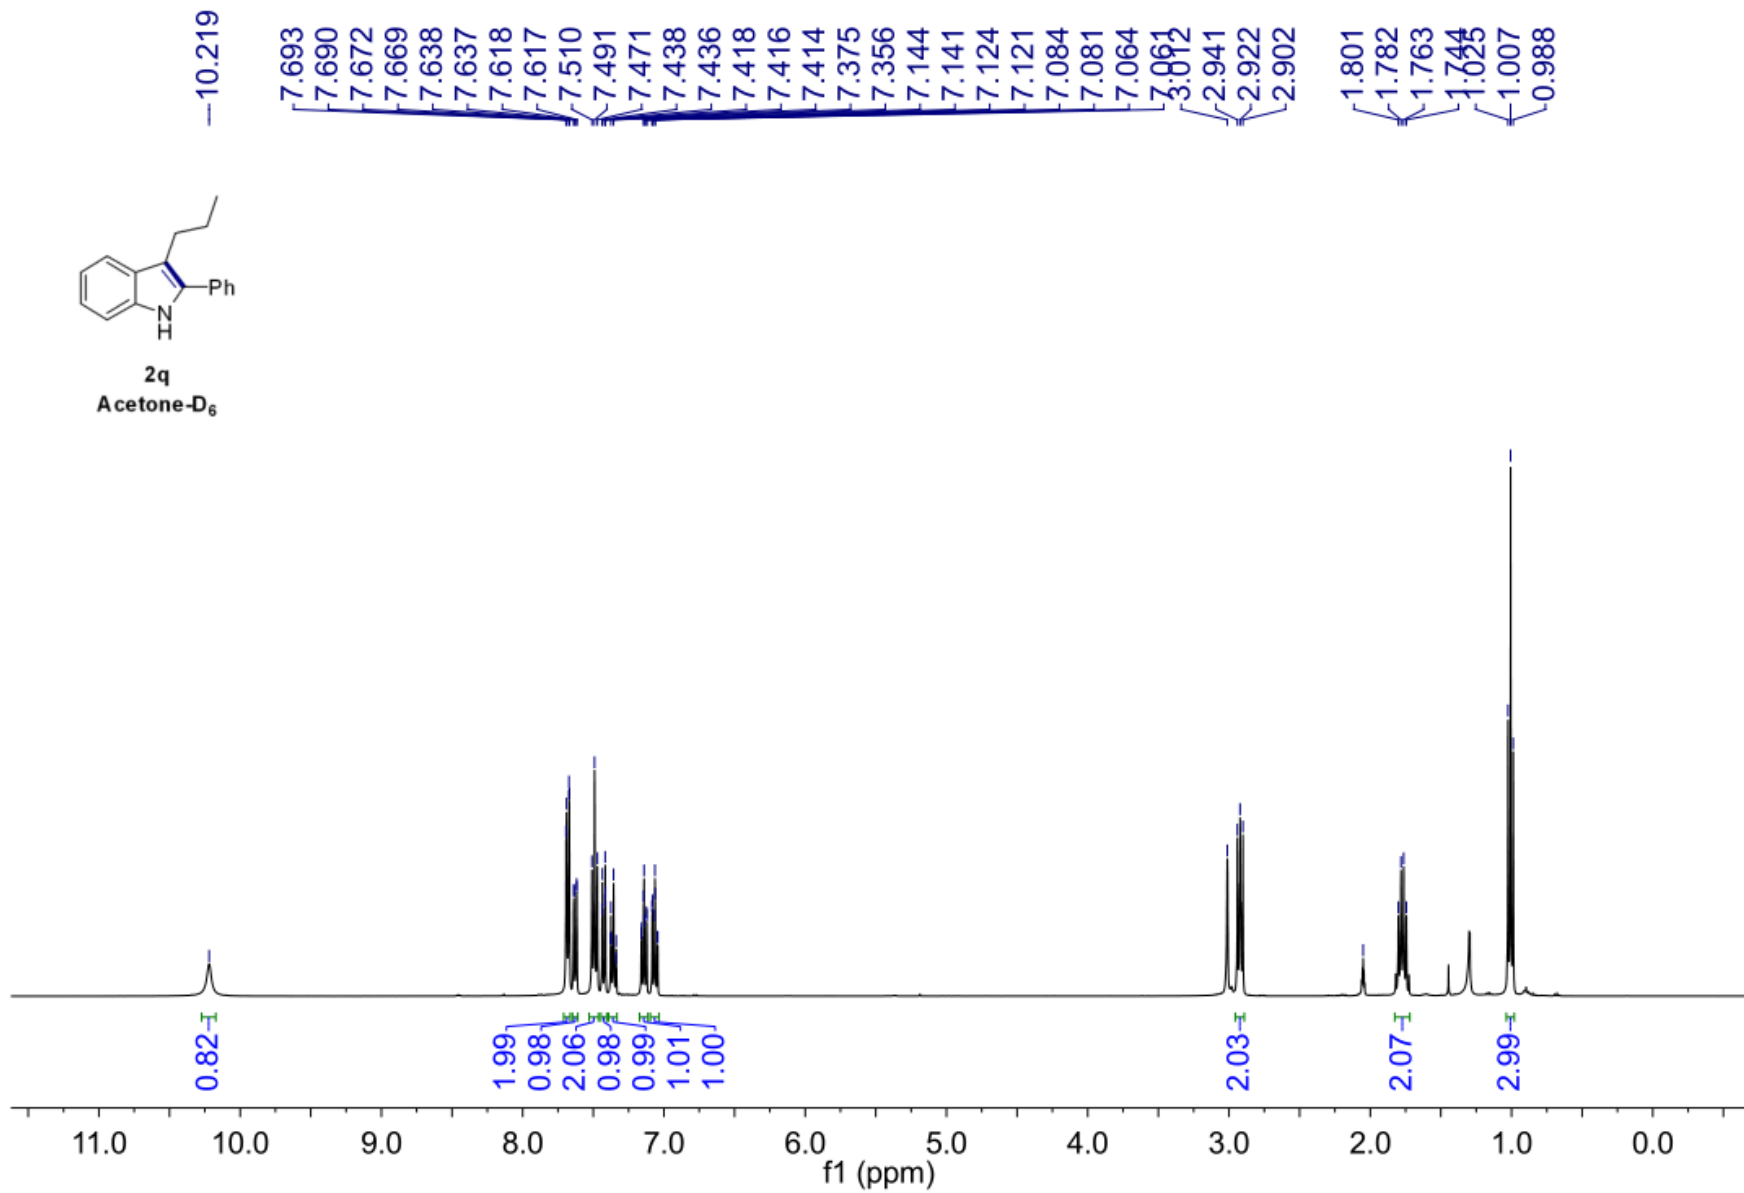

-206.310

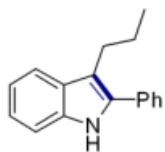

**2q**  
Acetone-D<sub>6</sub>

137.393  
134.998  
134.615  
130.250  
129.511  
128.712  
127.996  
122.481  
119.710  
119.678  
113.686  
111.862

30.417  
30.225  
30.032  
29.840  
29.648  
29.455  
29.263  
27.449  
25.028  
14.632

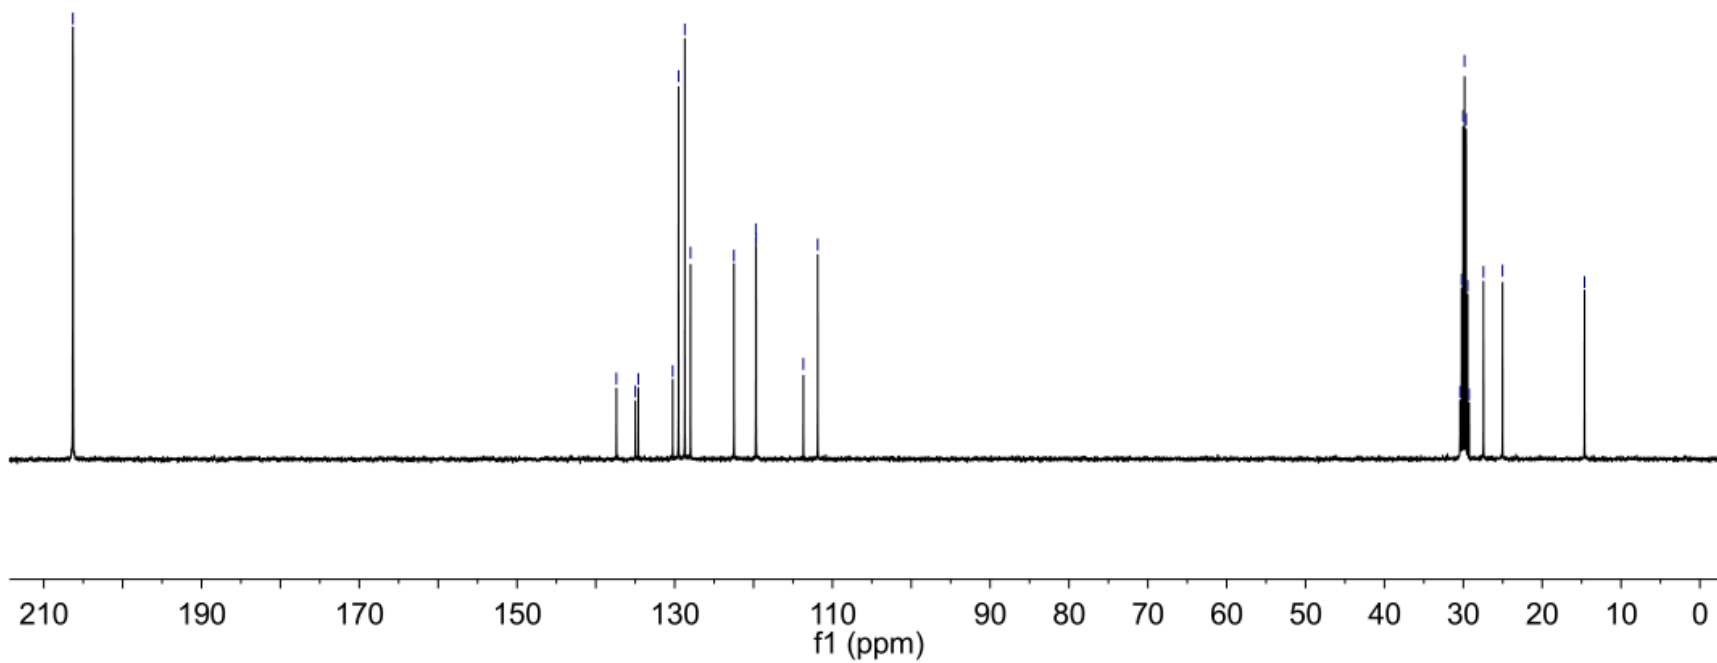

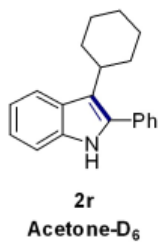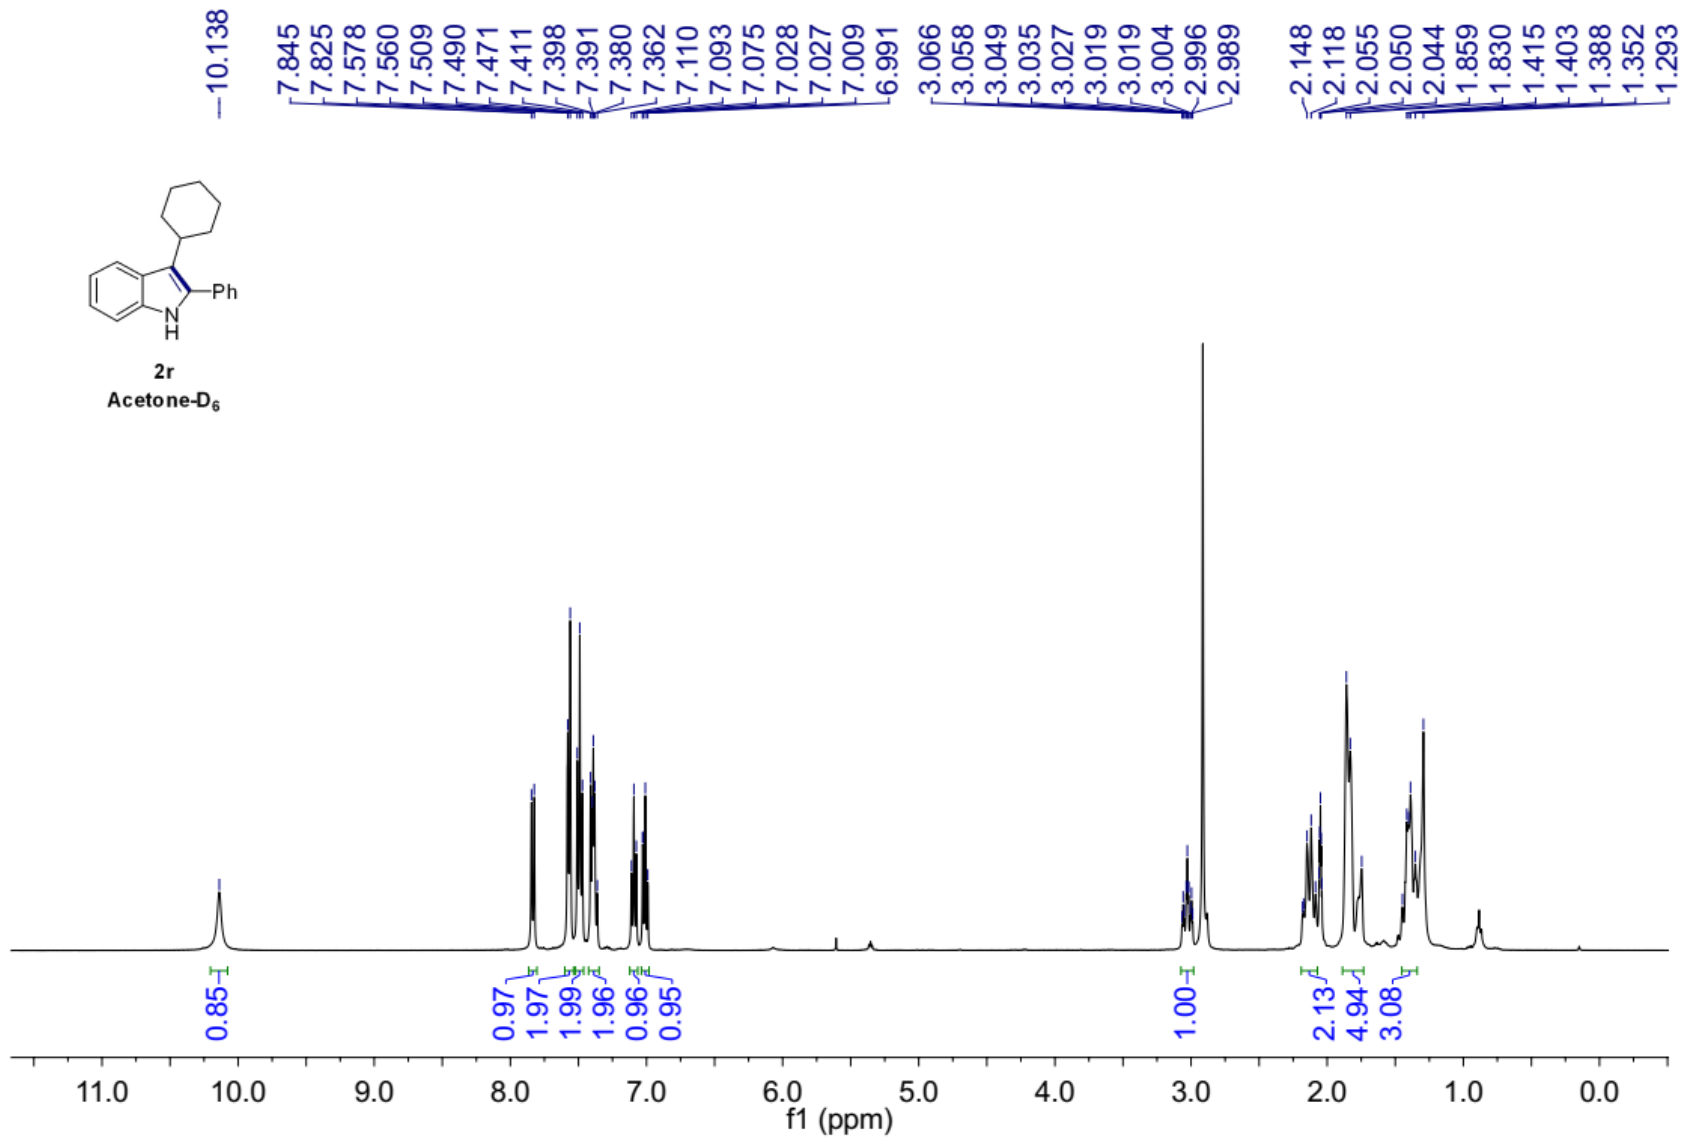

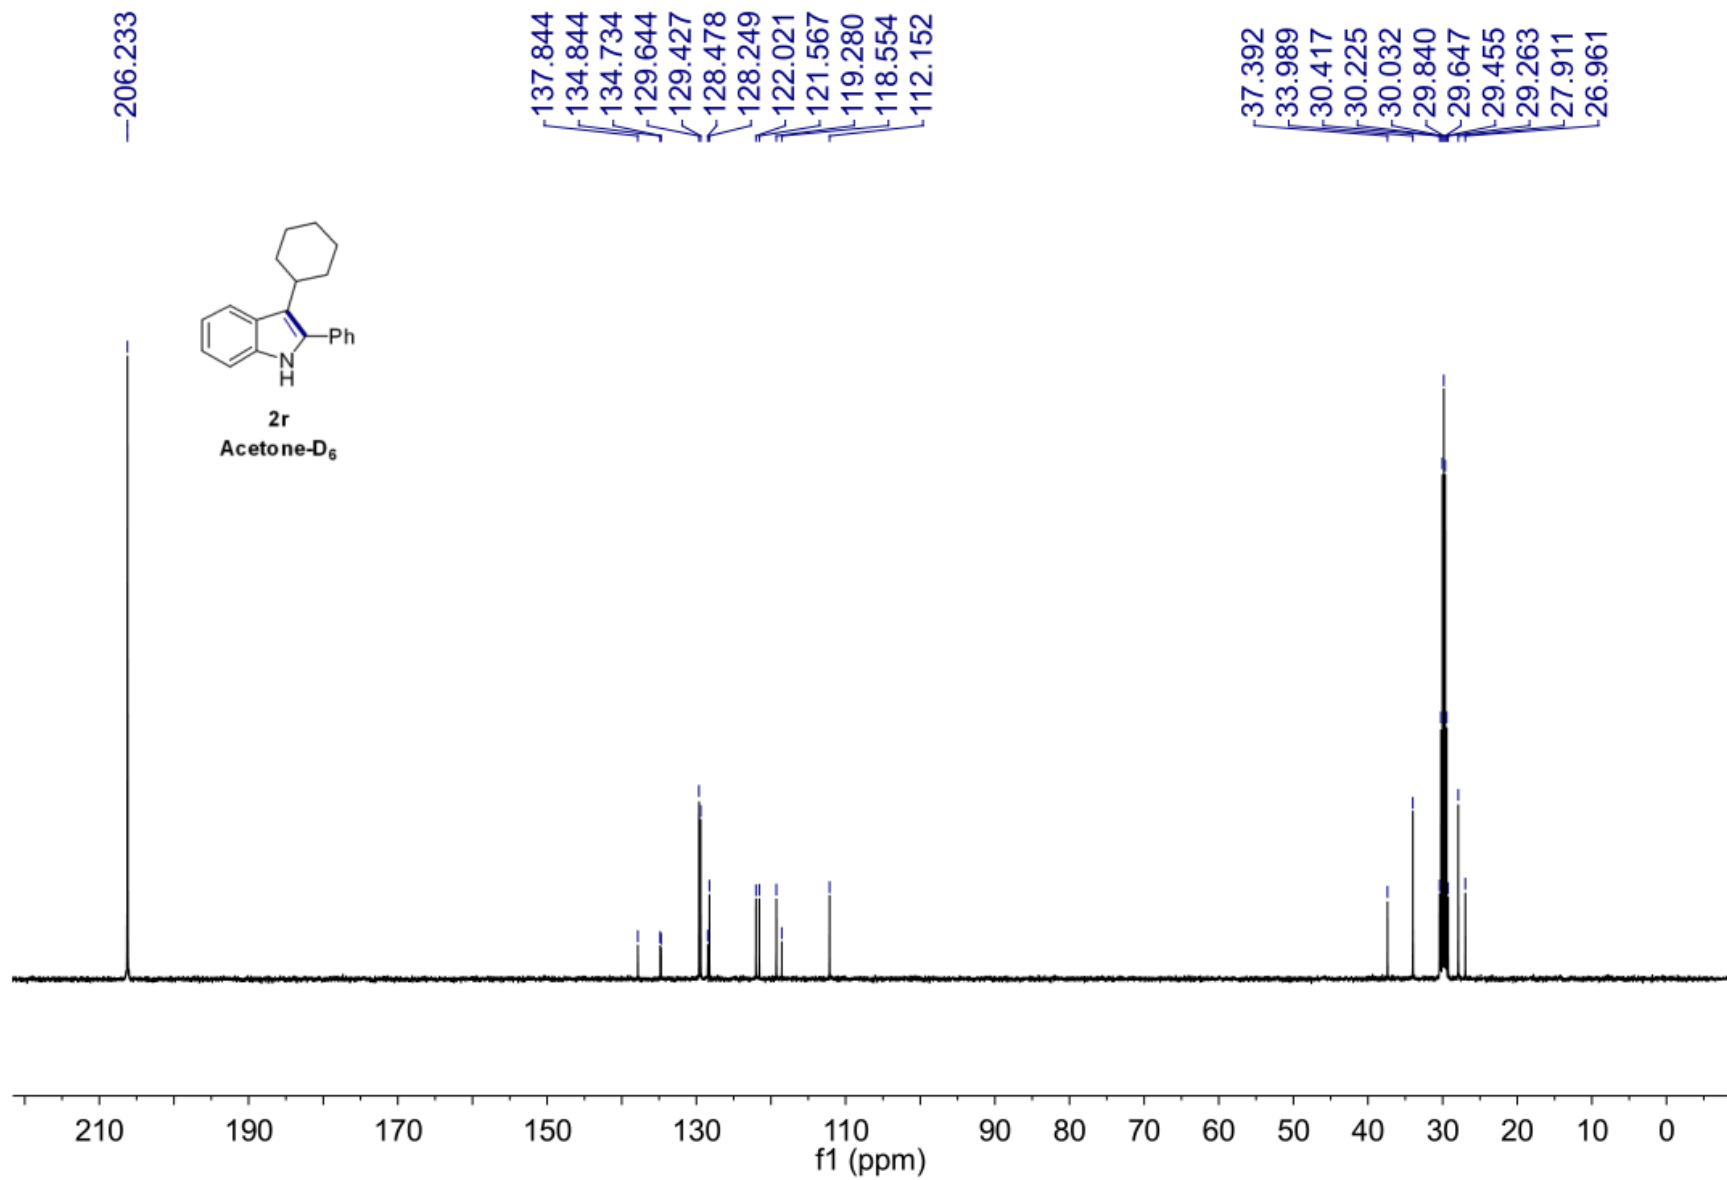



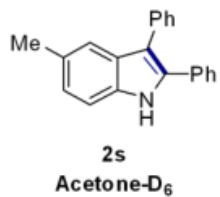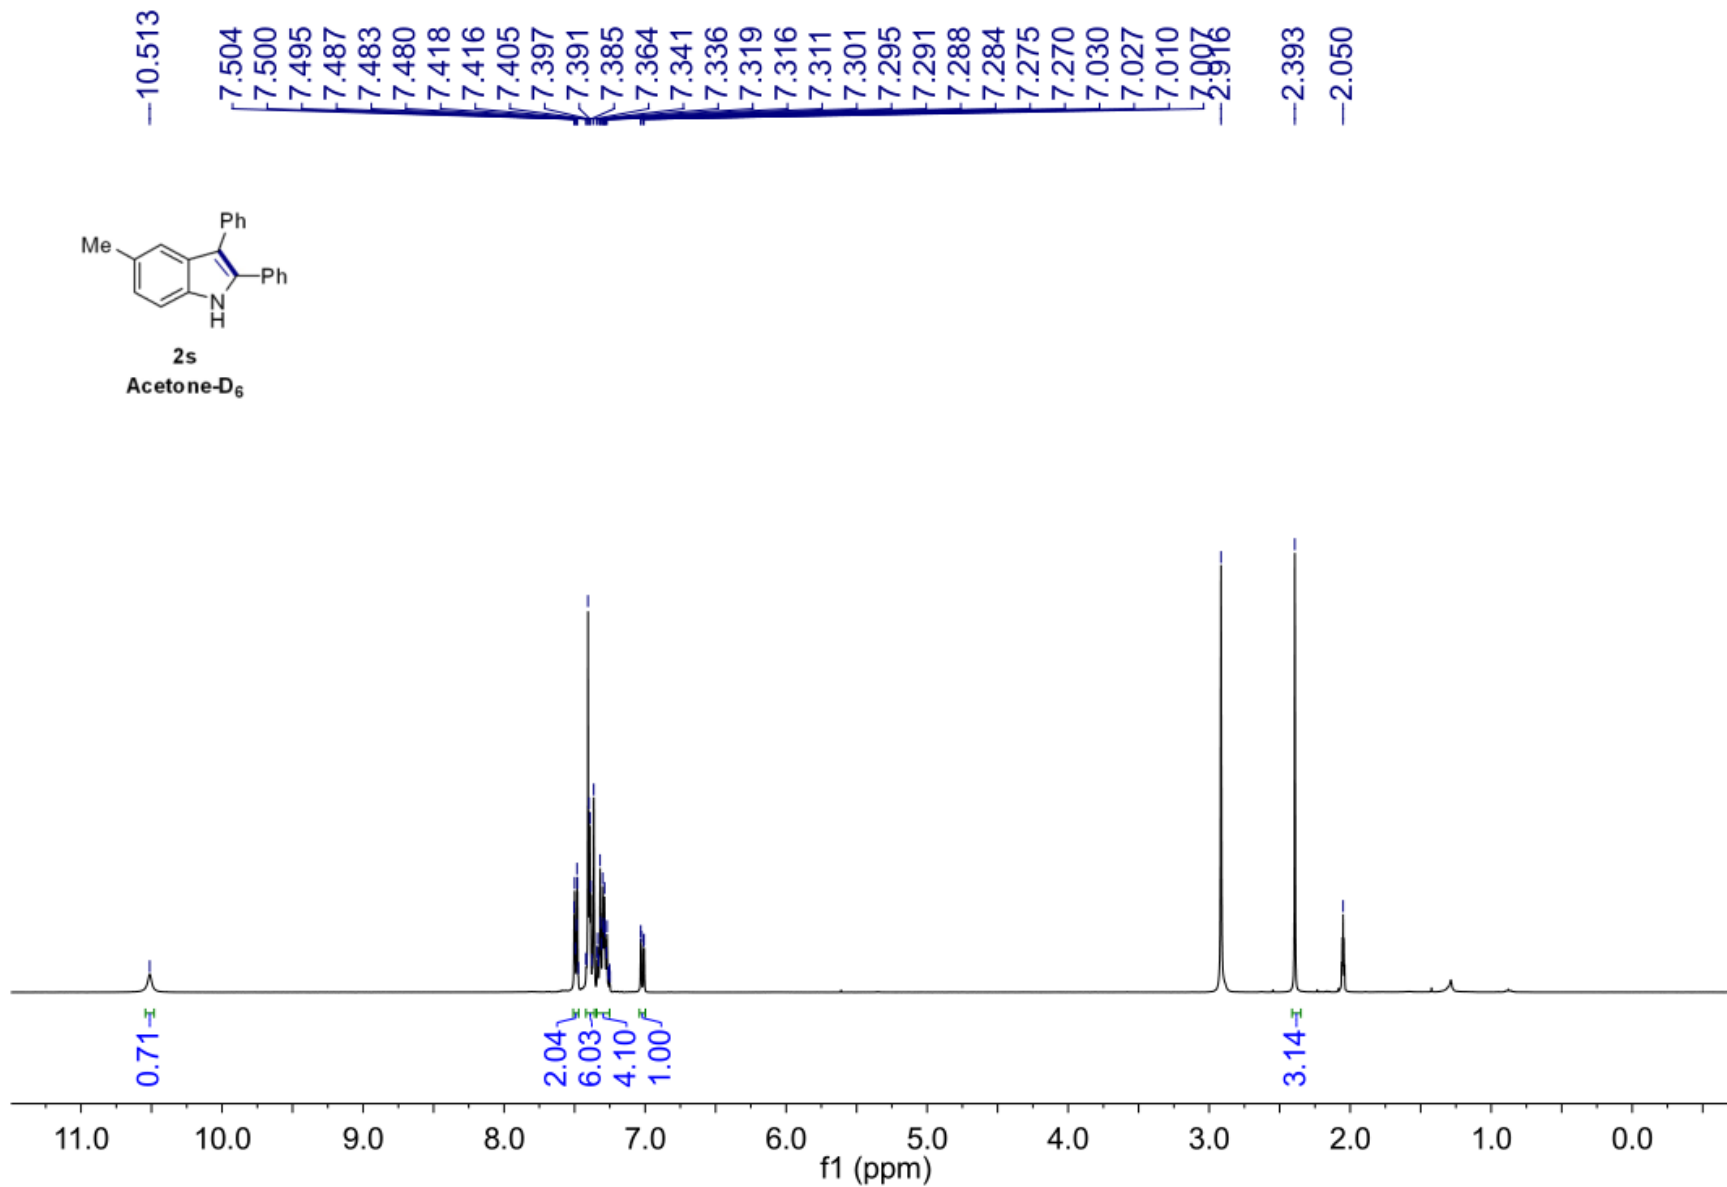

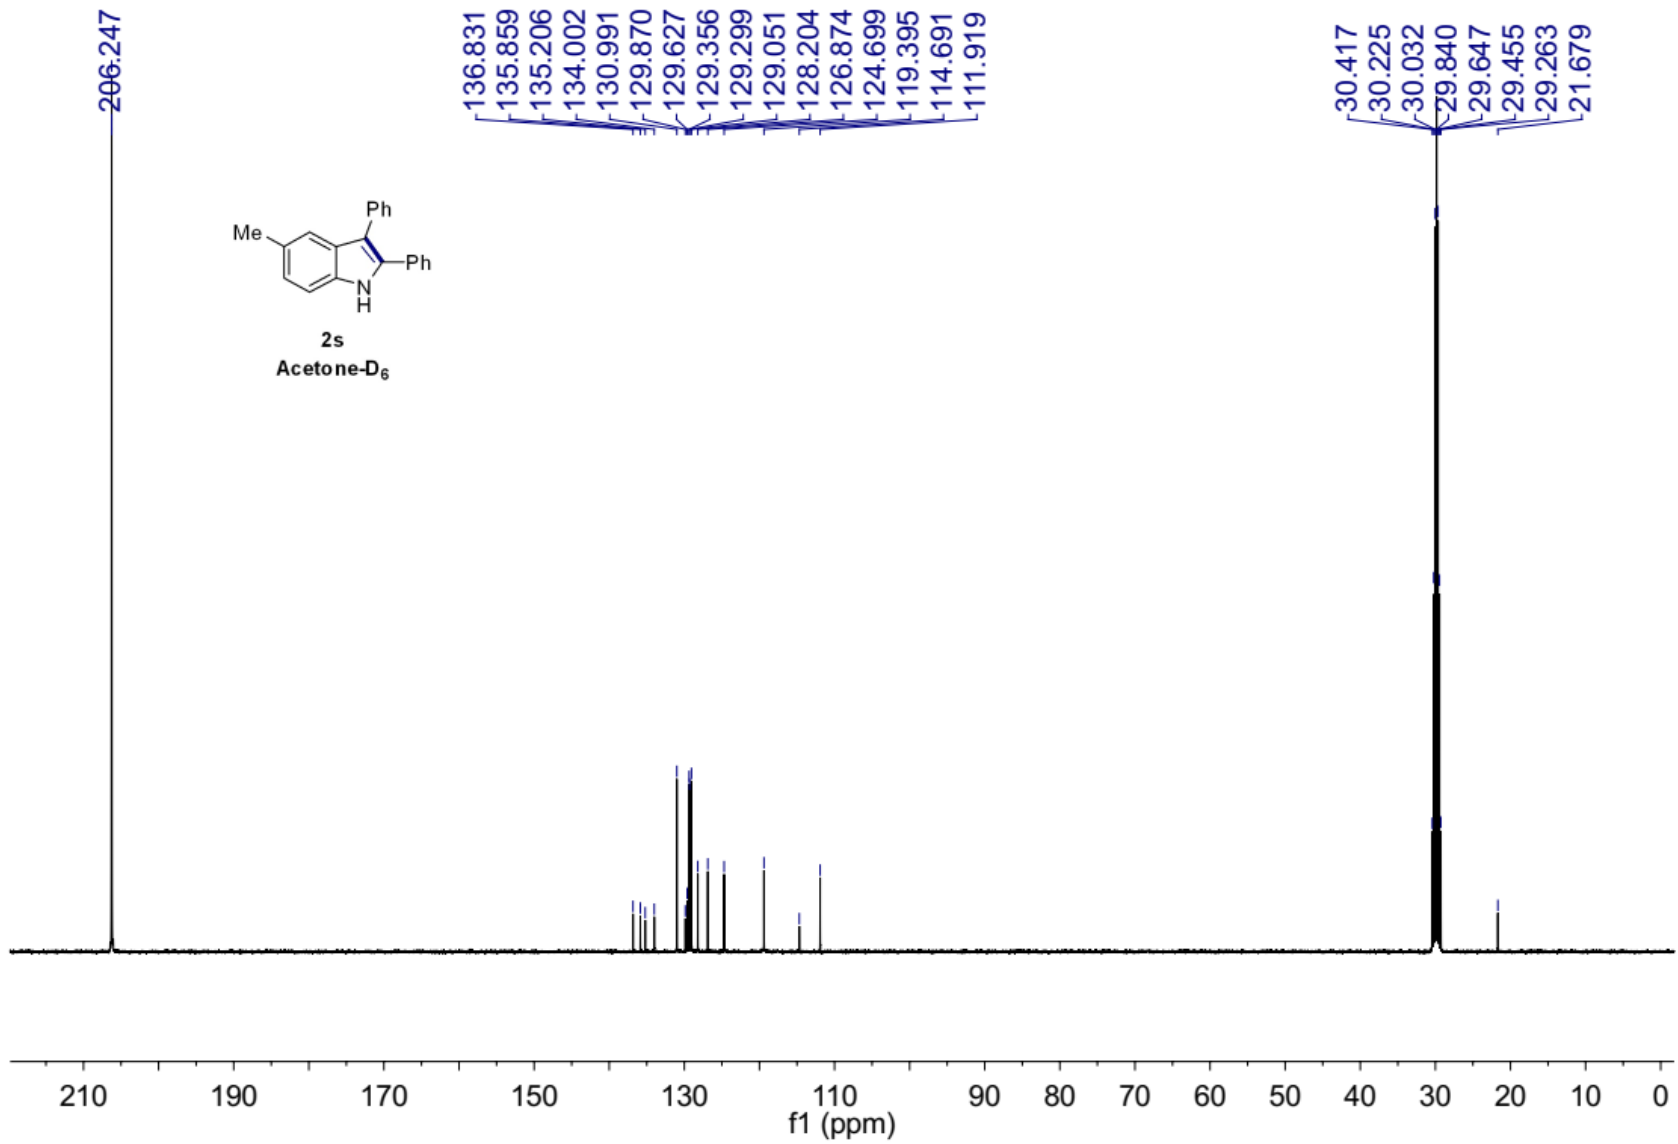

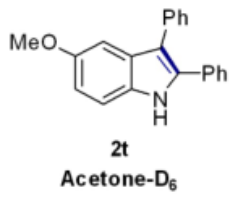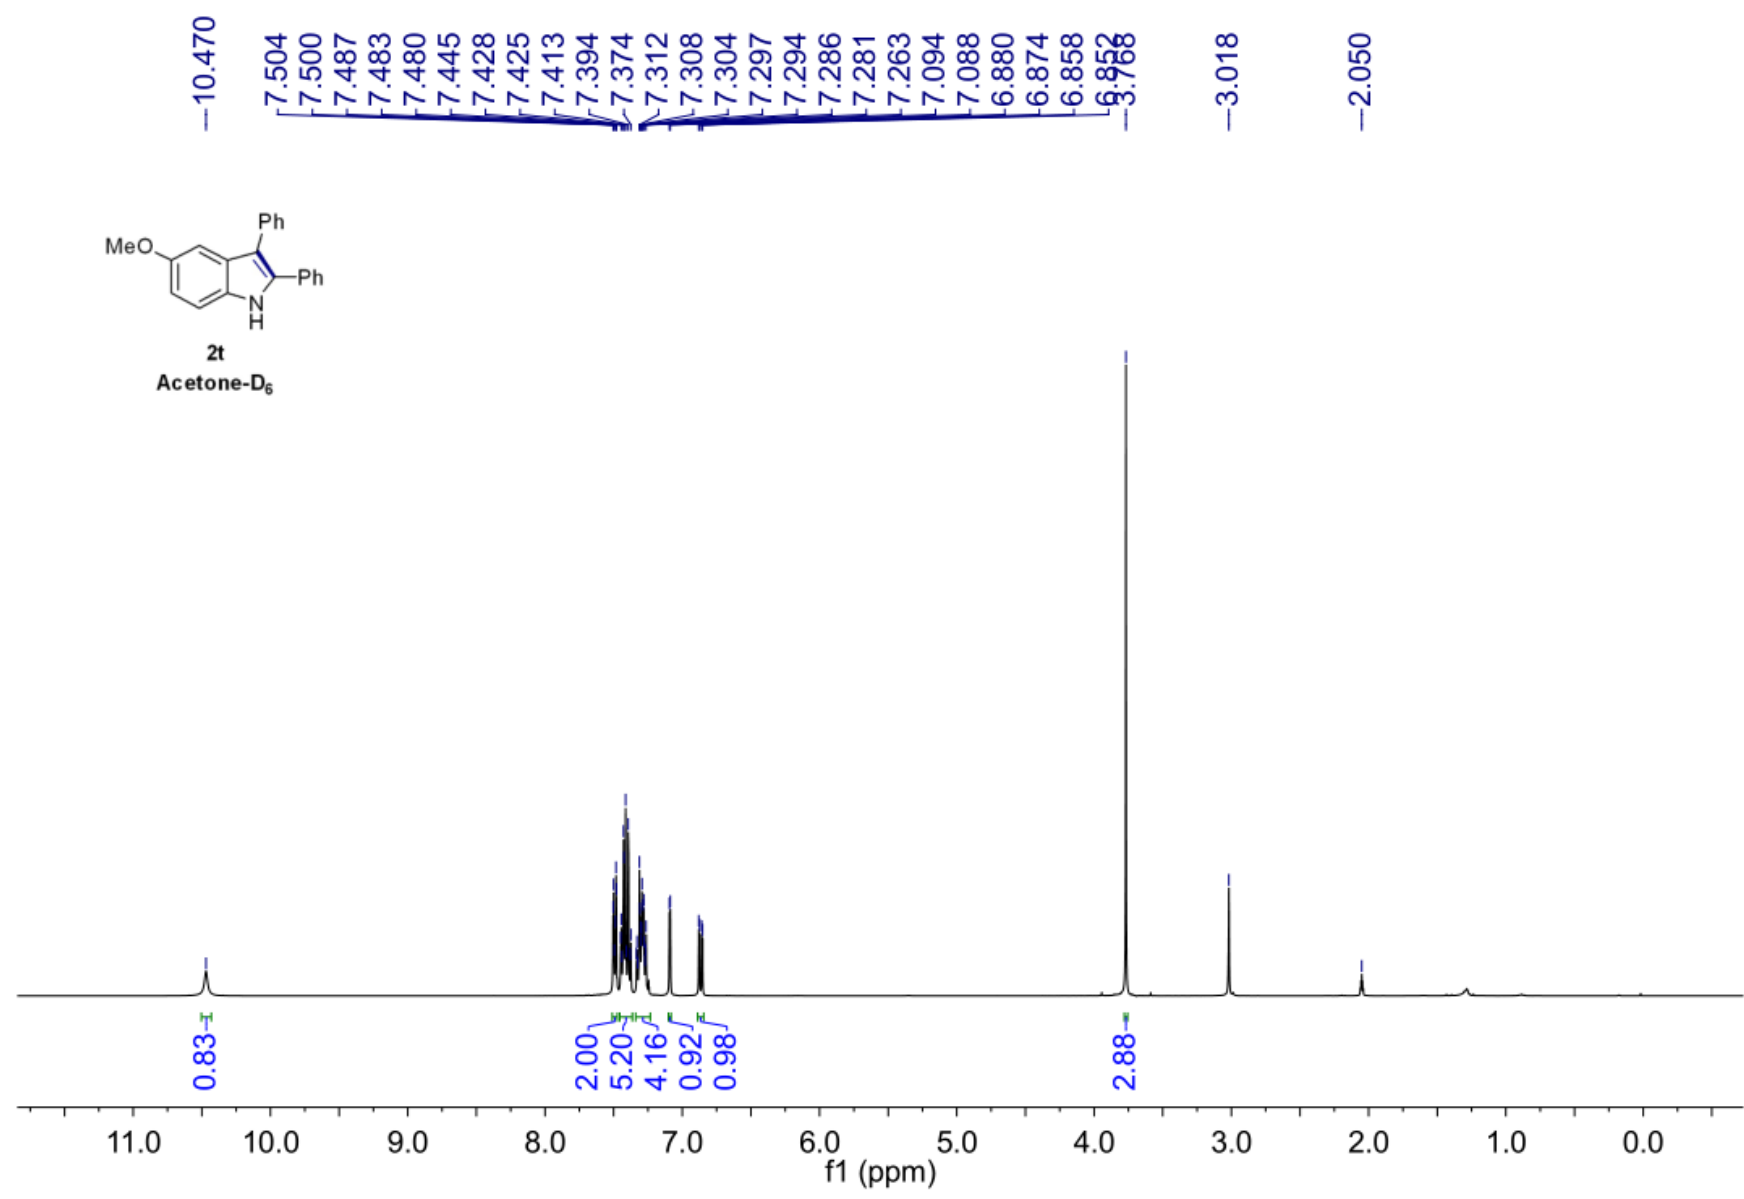

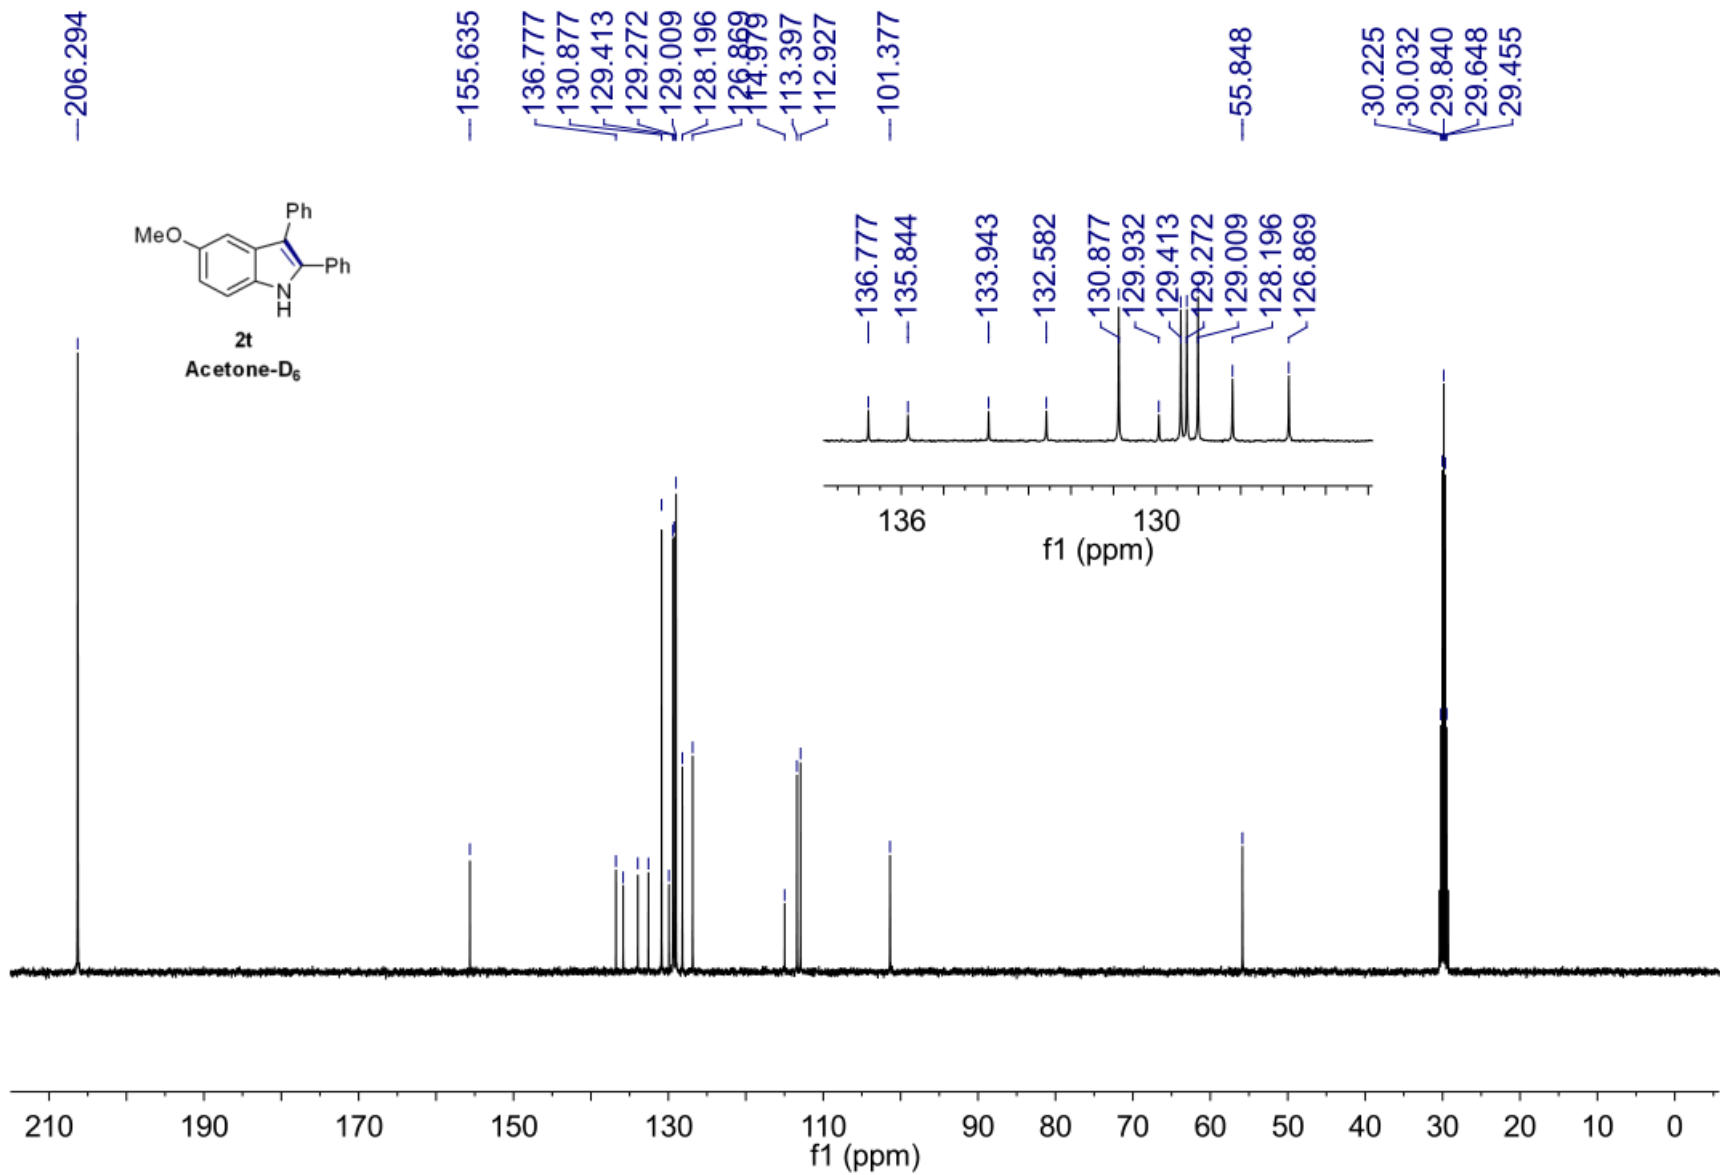

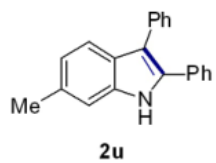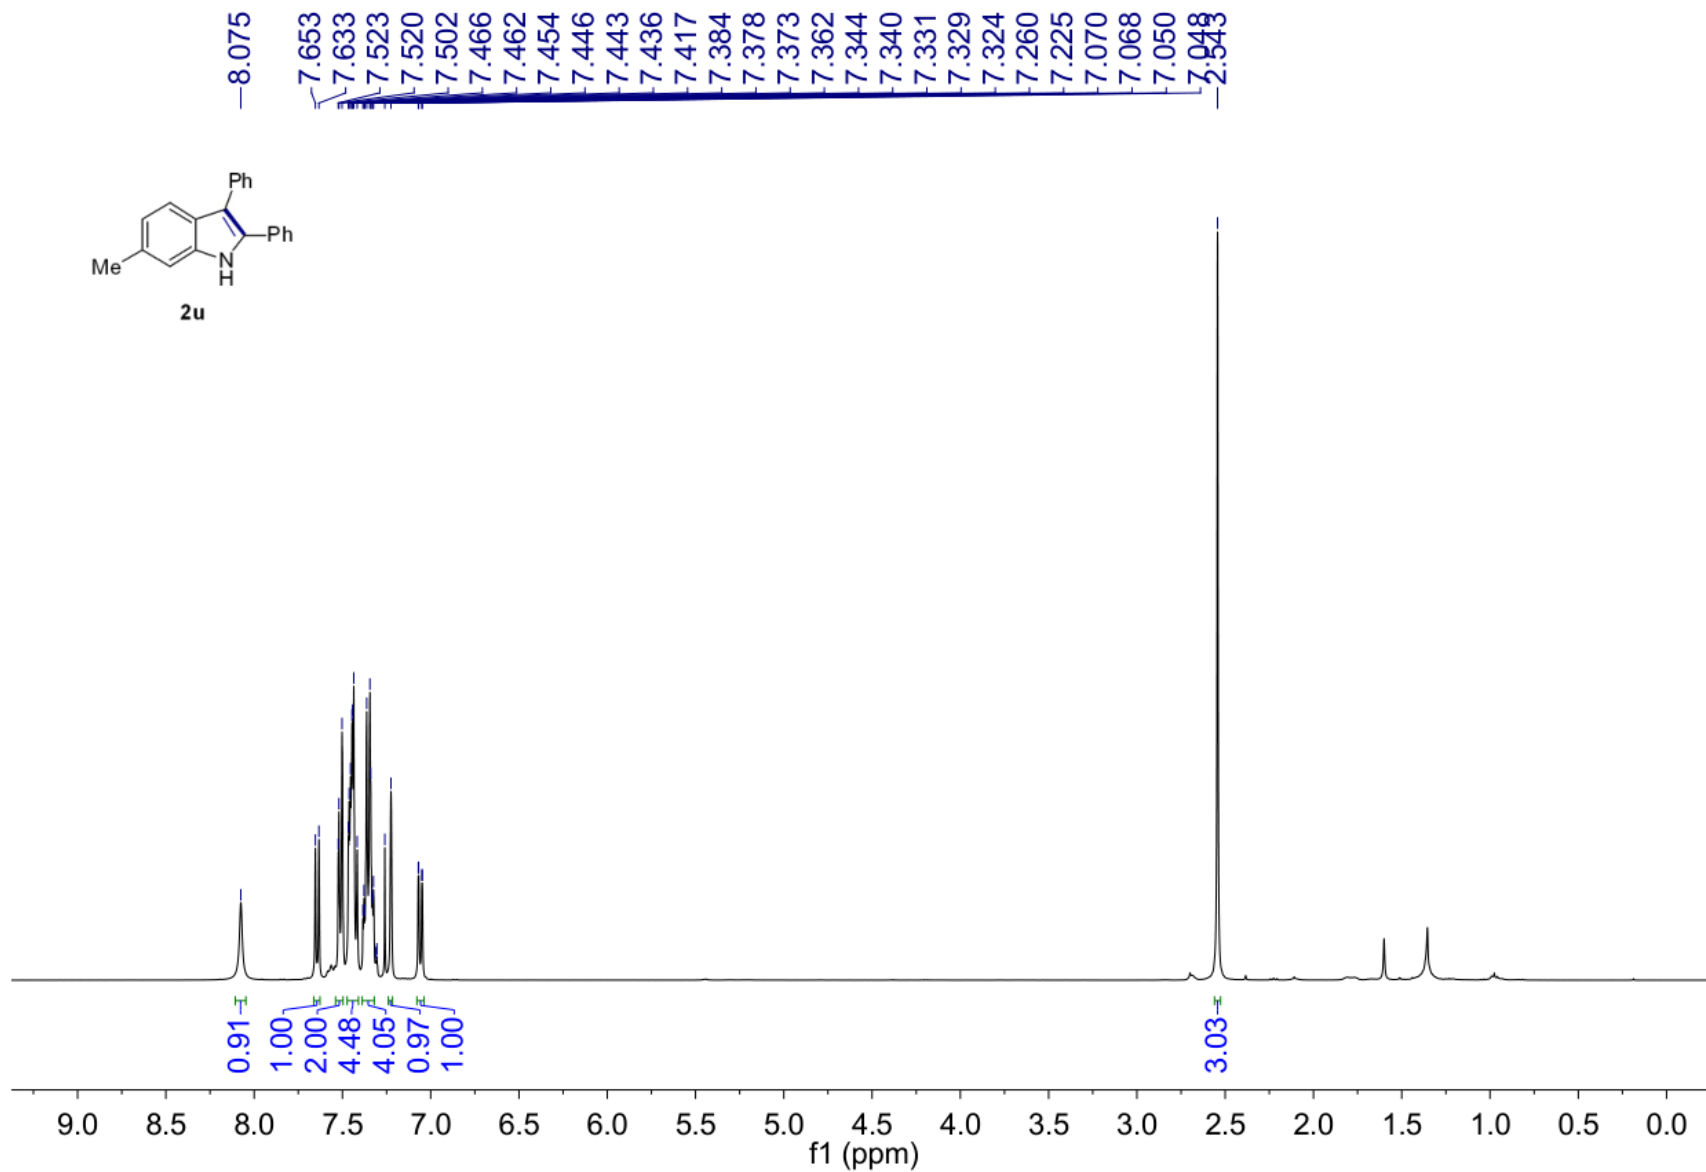

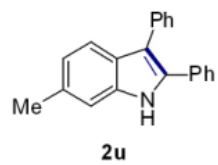

136.311  
135.229  
133.354  
132.819  
132.547  
130.063  
128.587  
128.451  
128.029  
127.438  
126.625  
126.097  
122.153  
119.312  
114.851  
110.819

77.318  
77.000  
76.683

-21.707

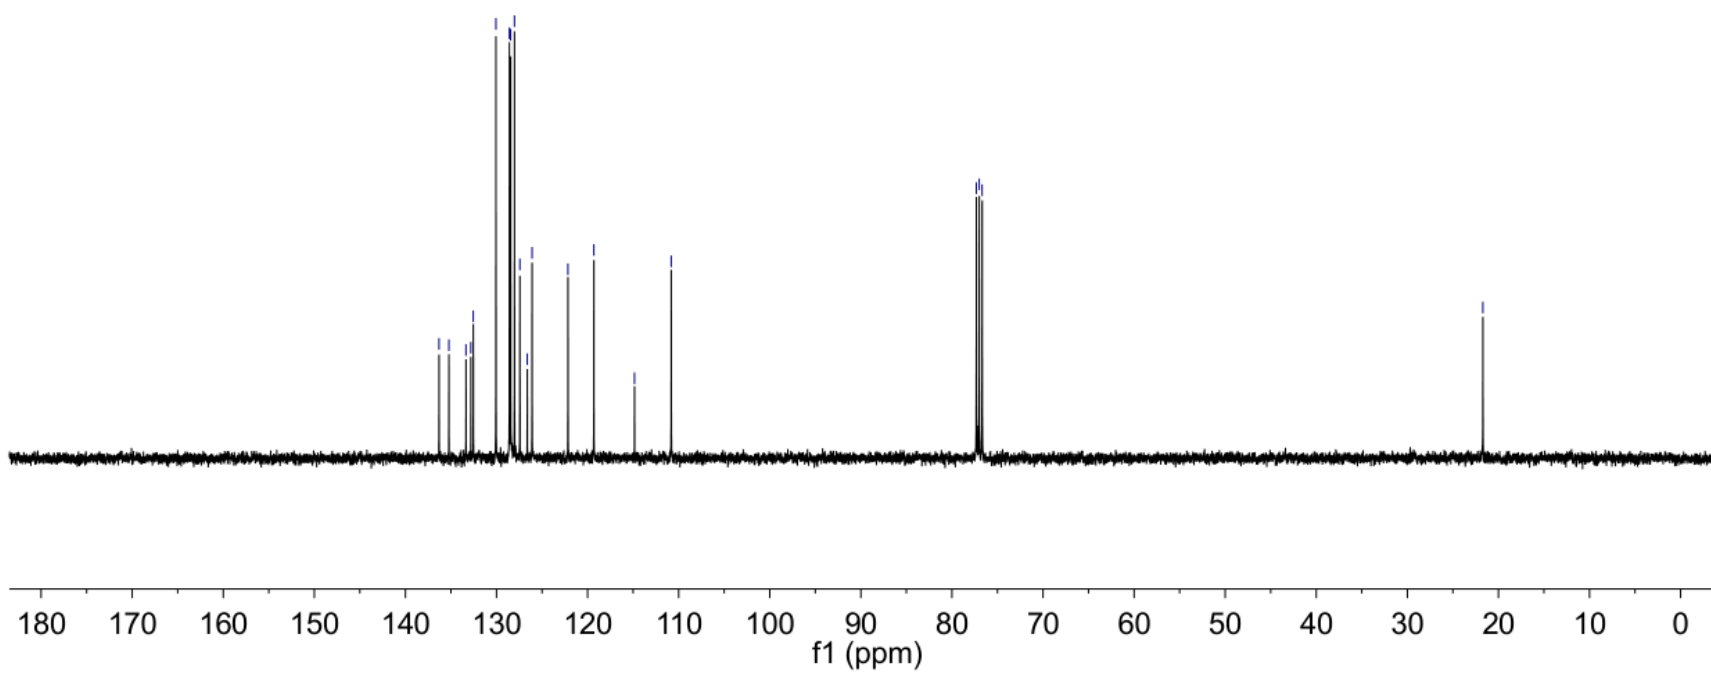

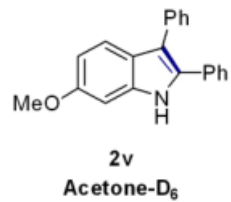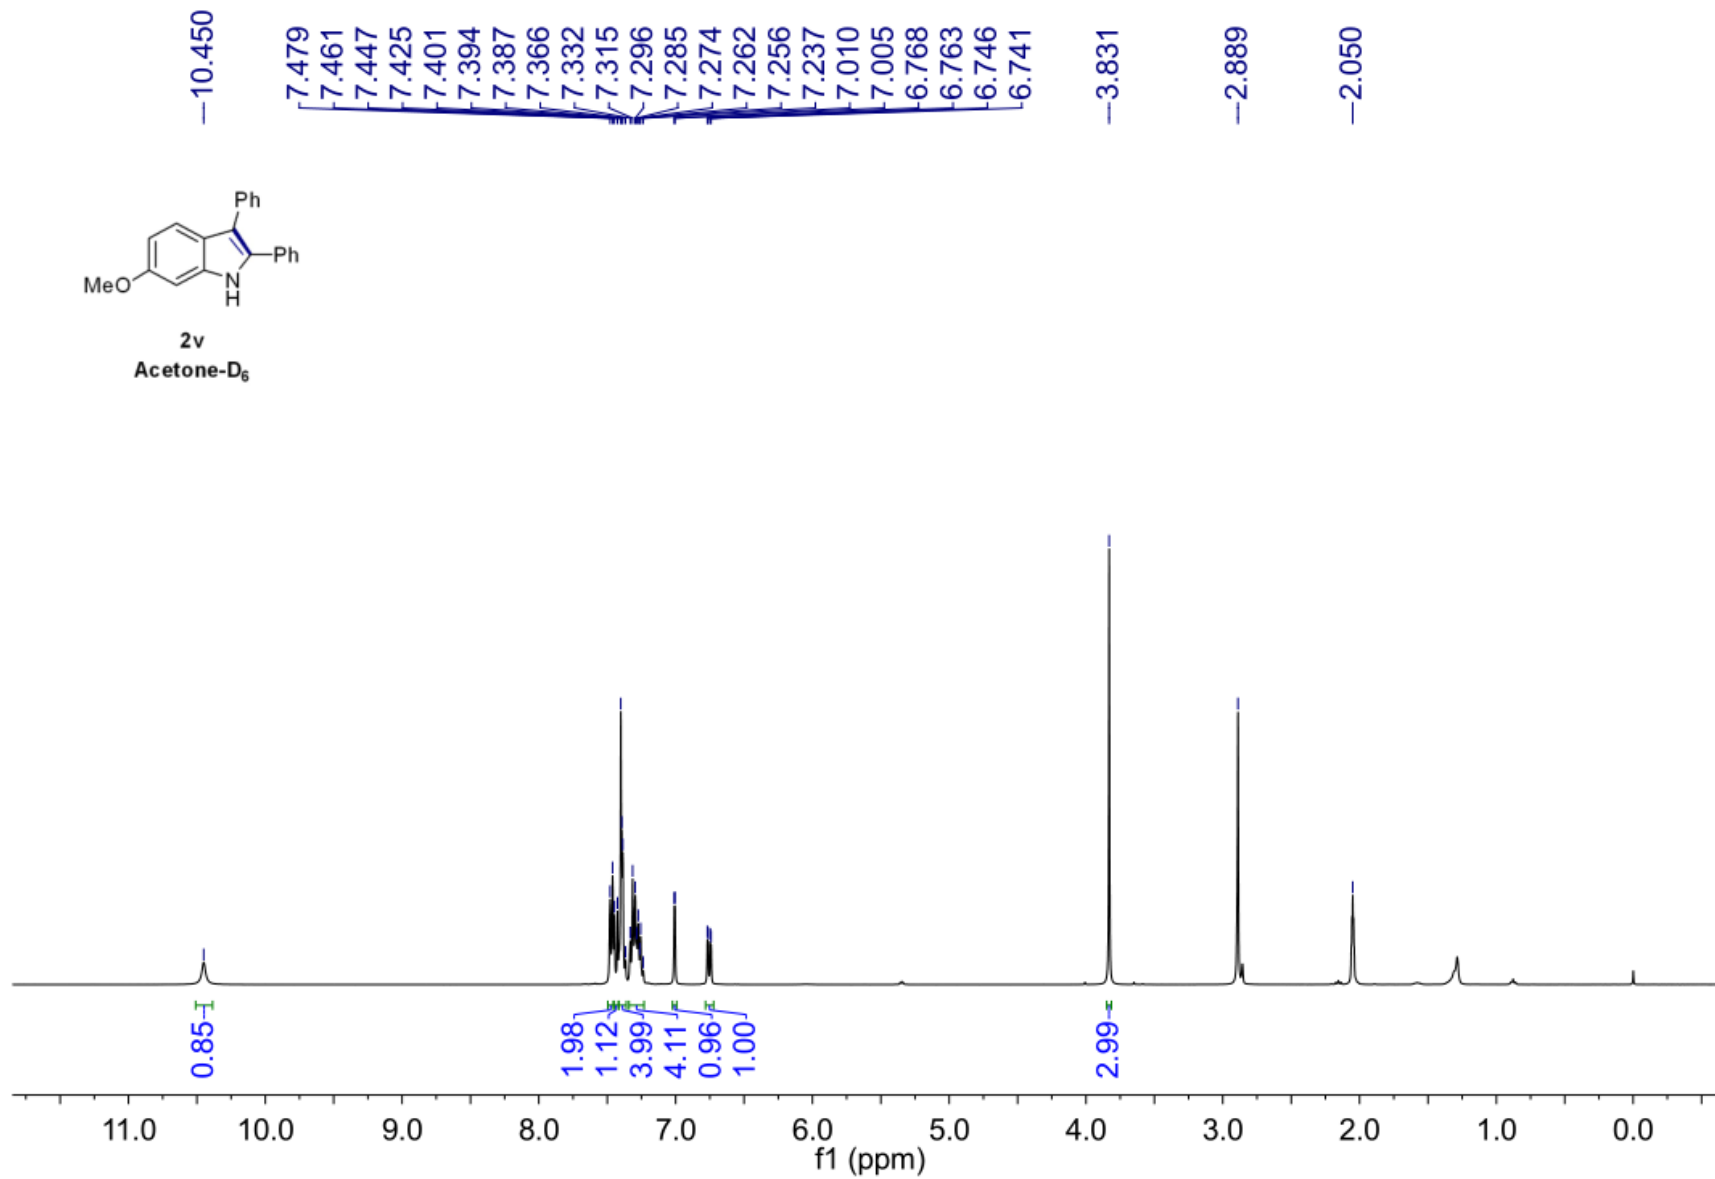

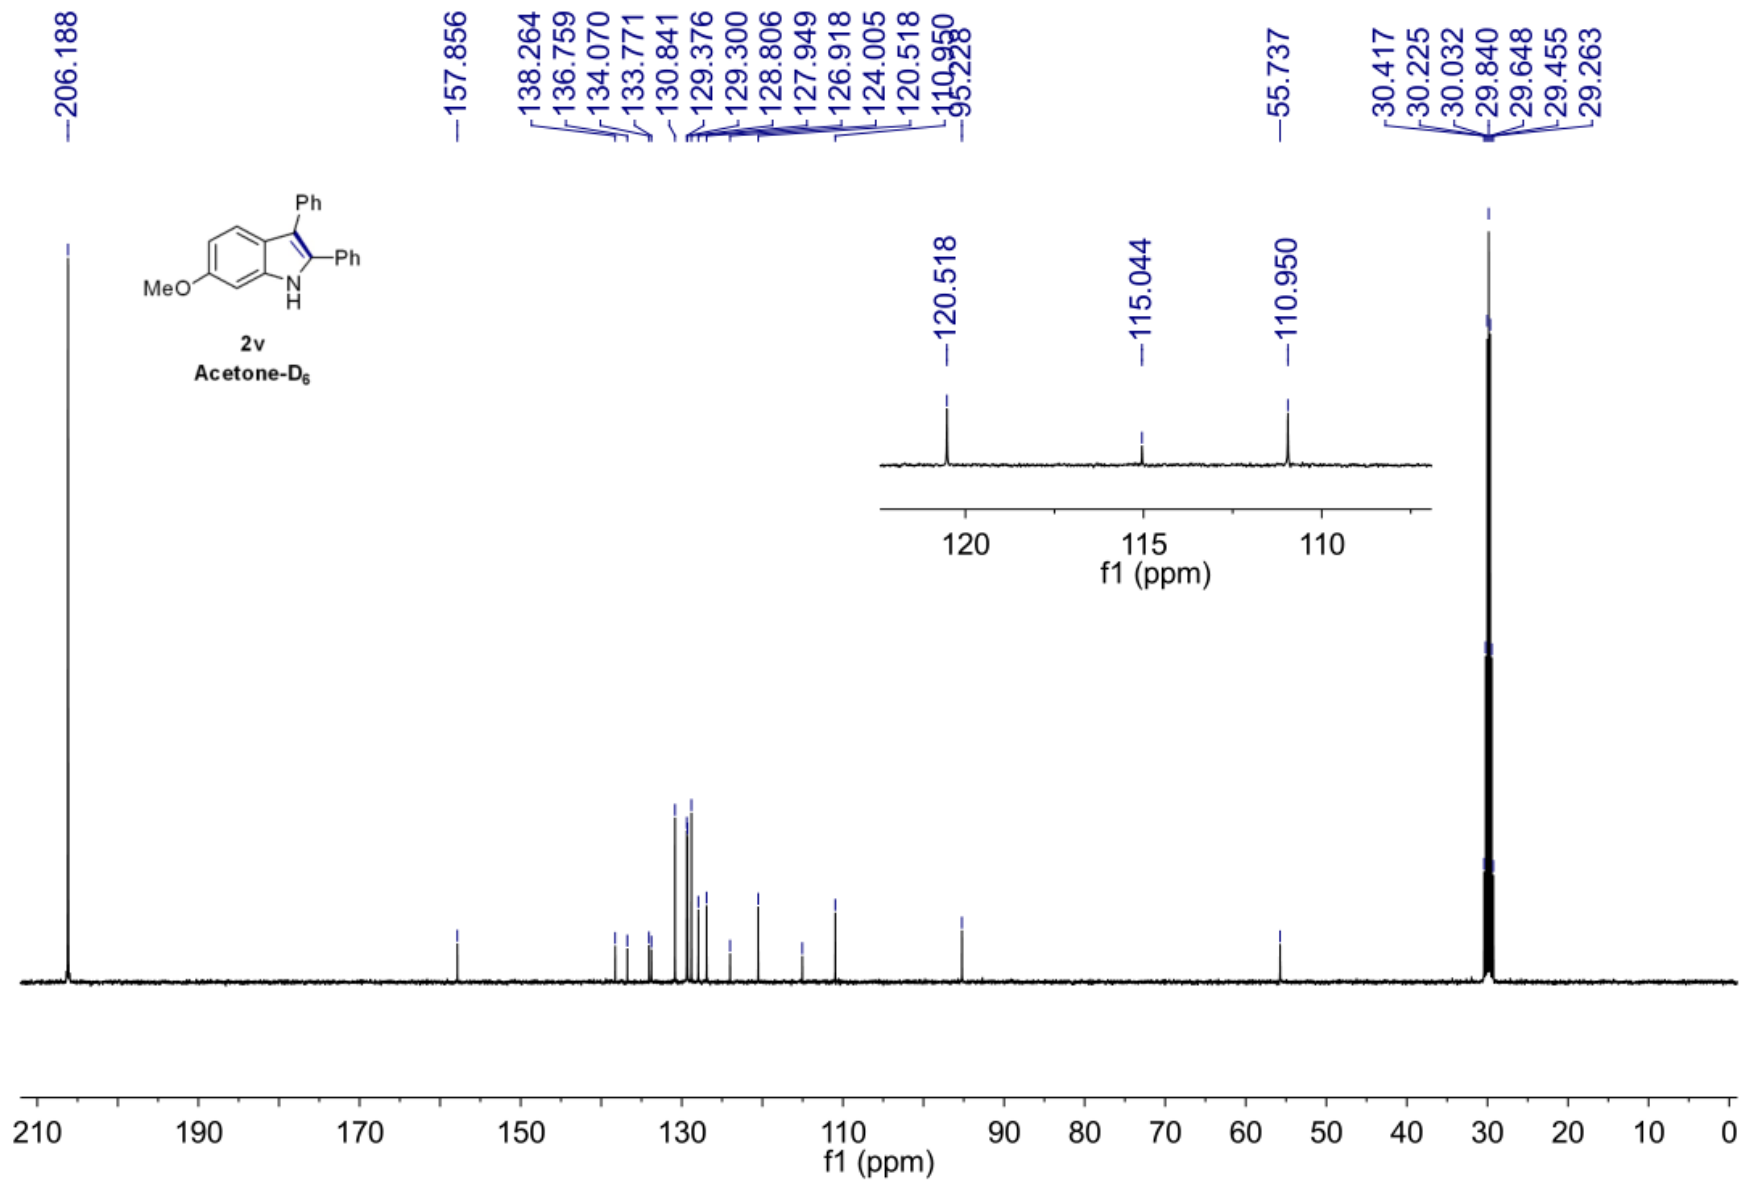



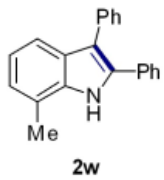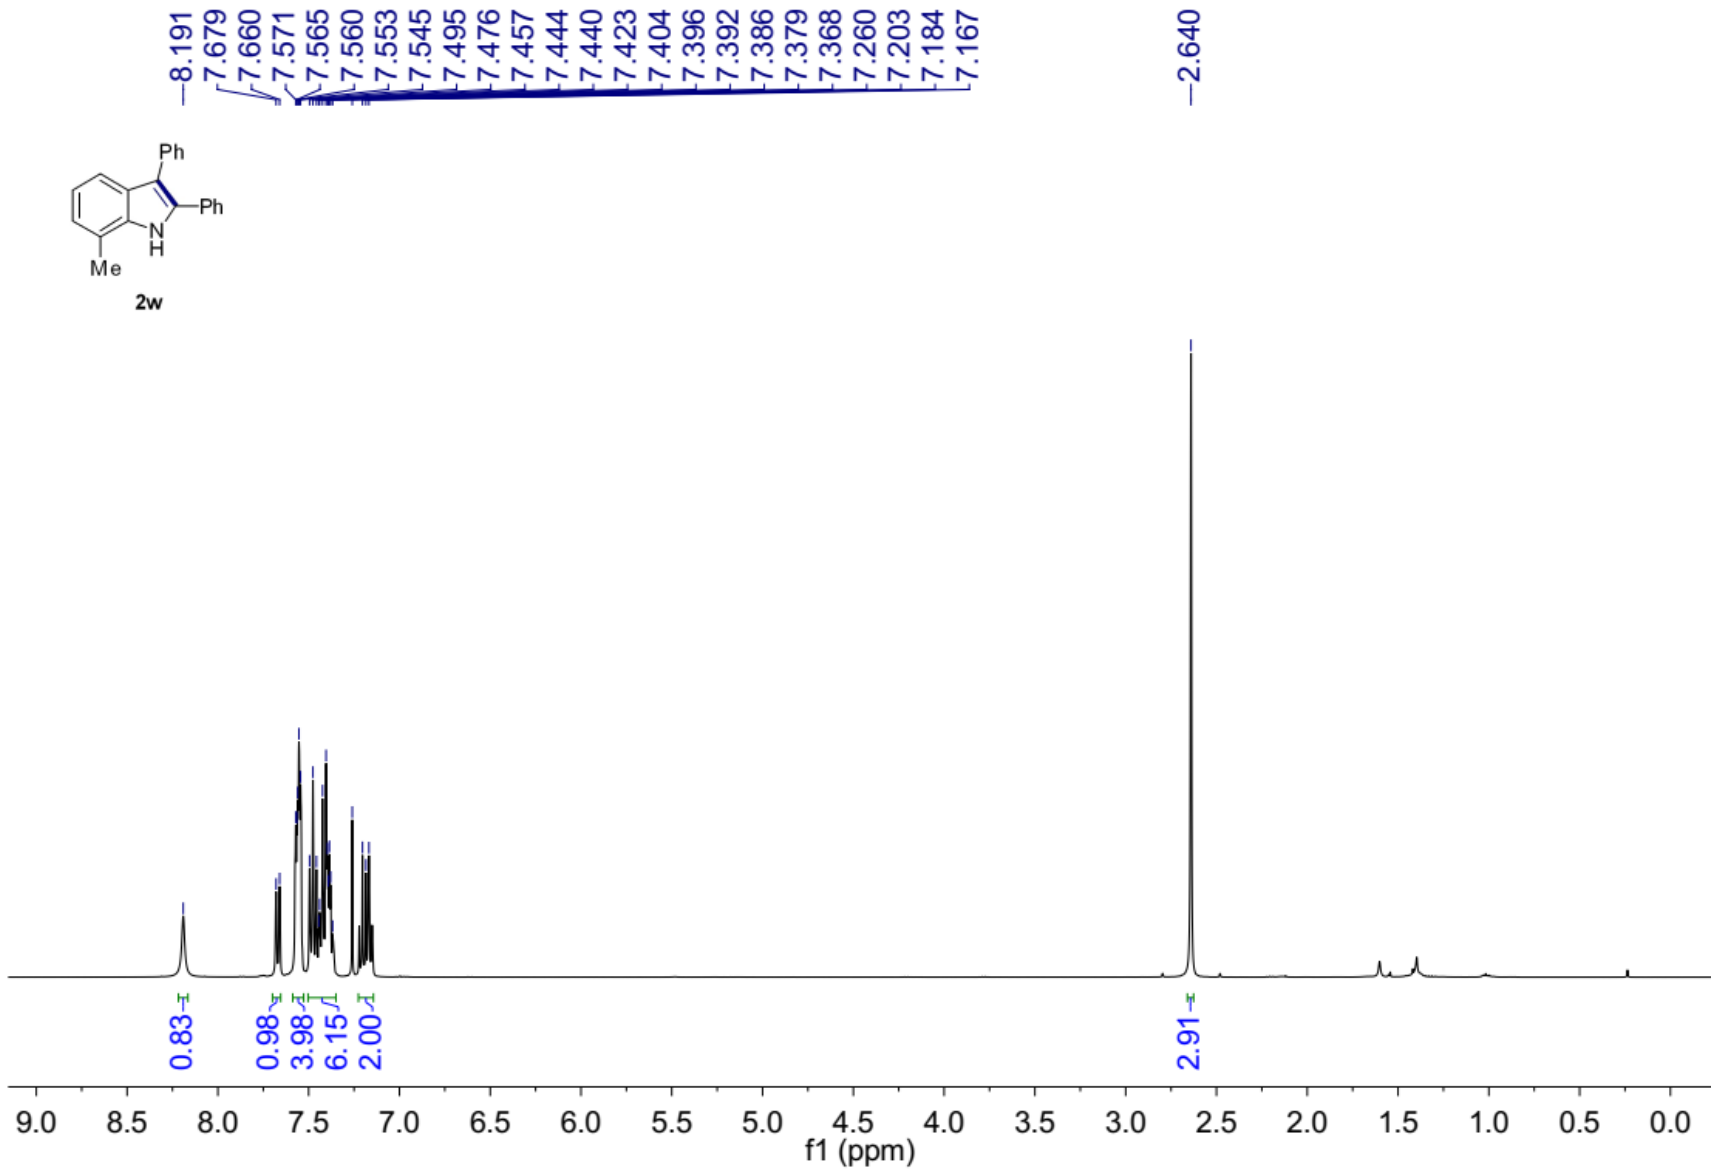

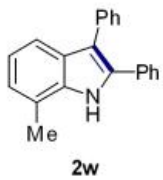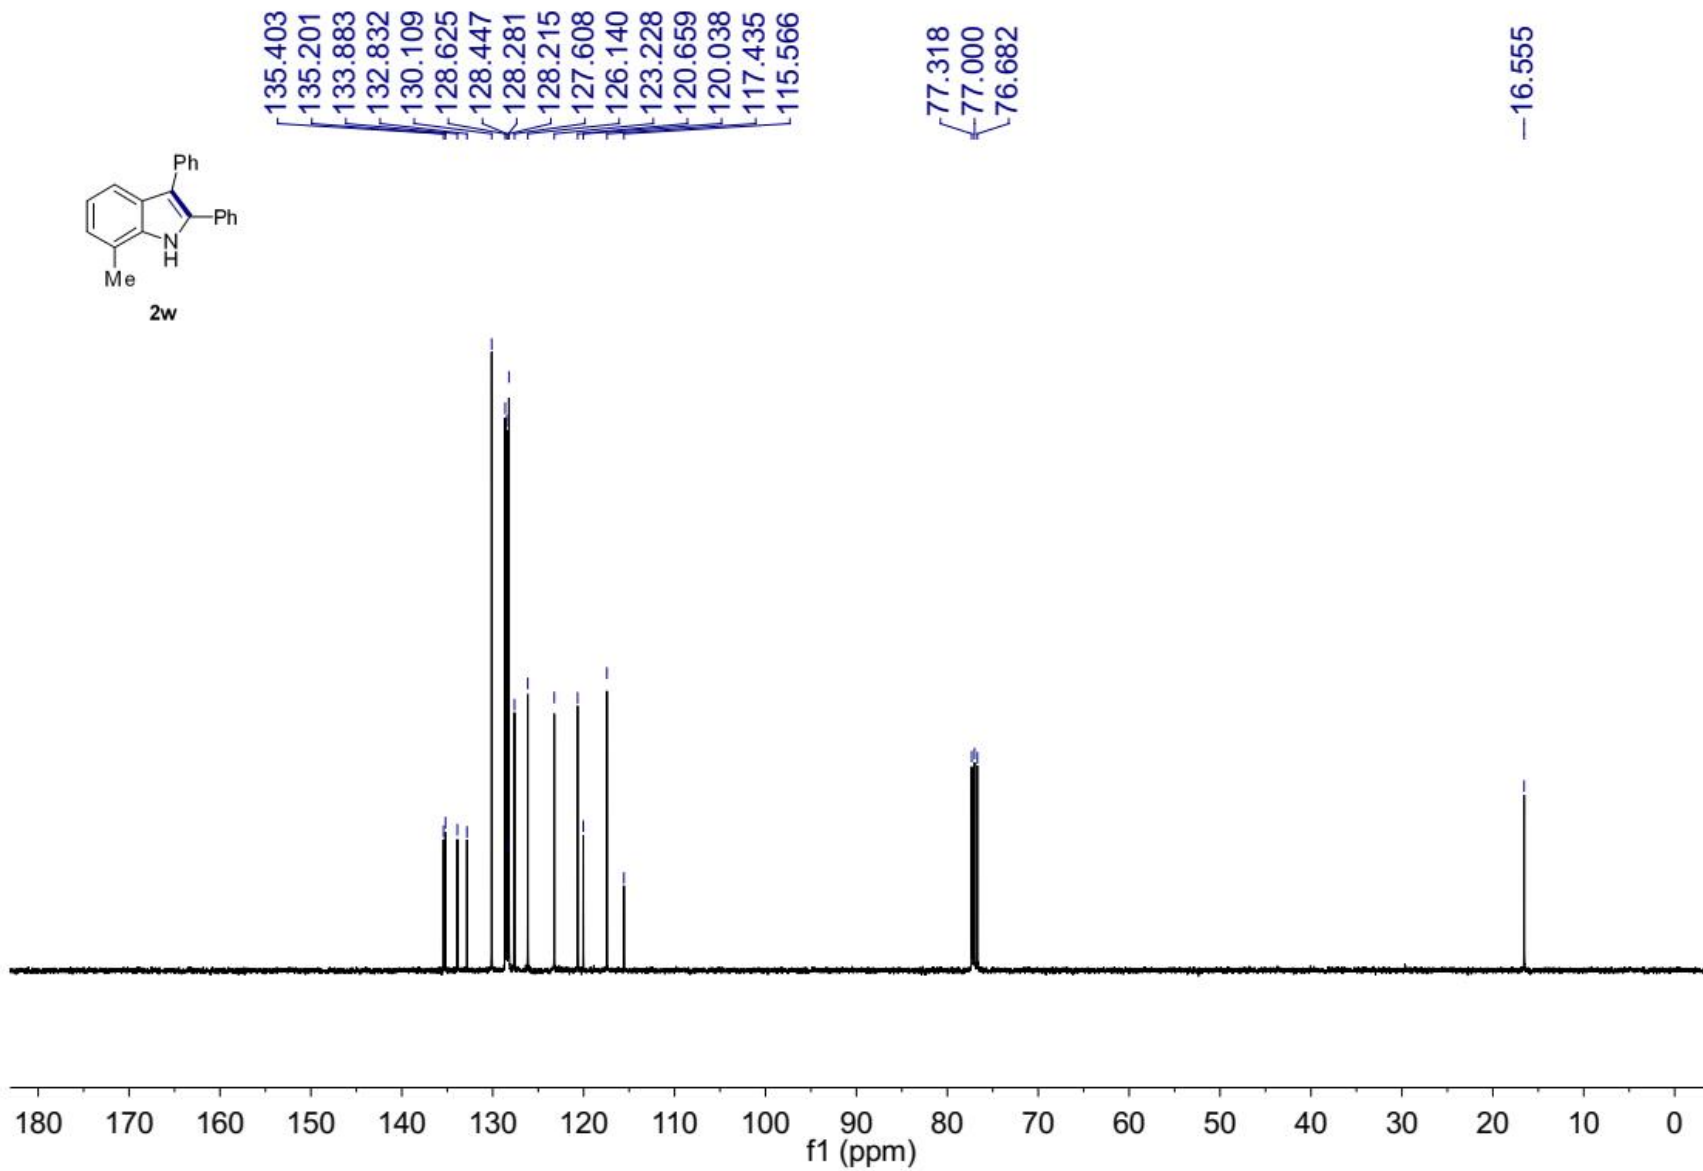

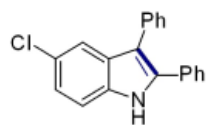

2x

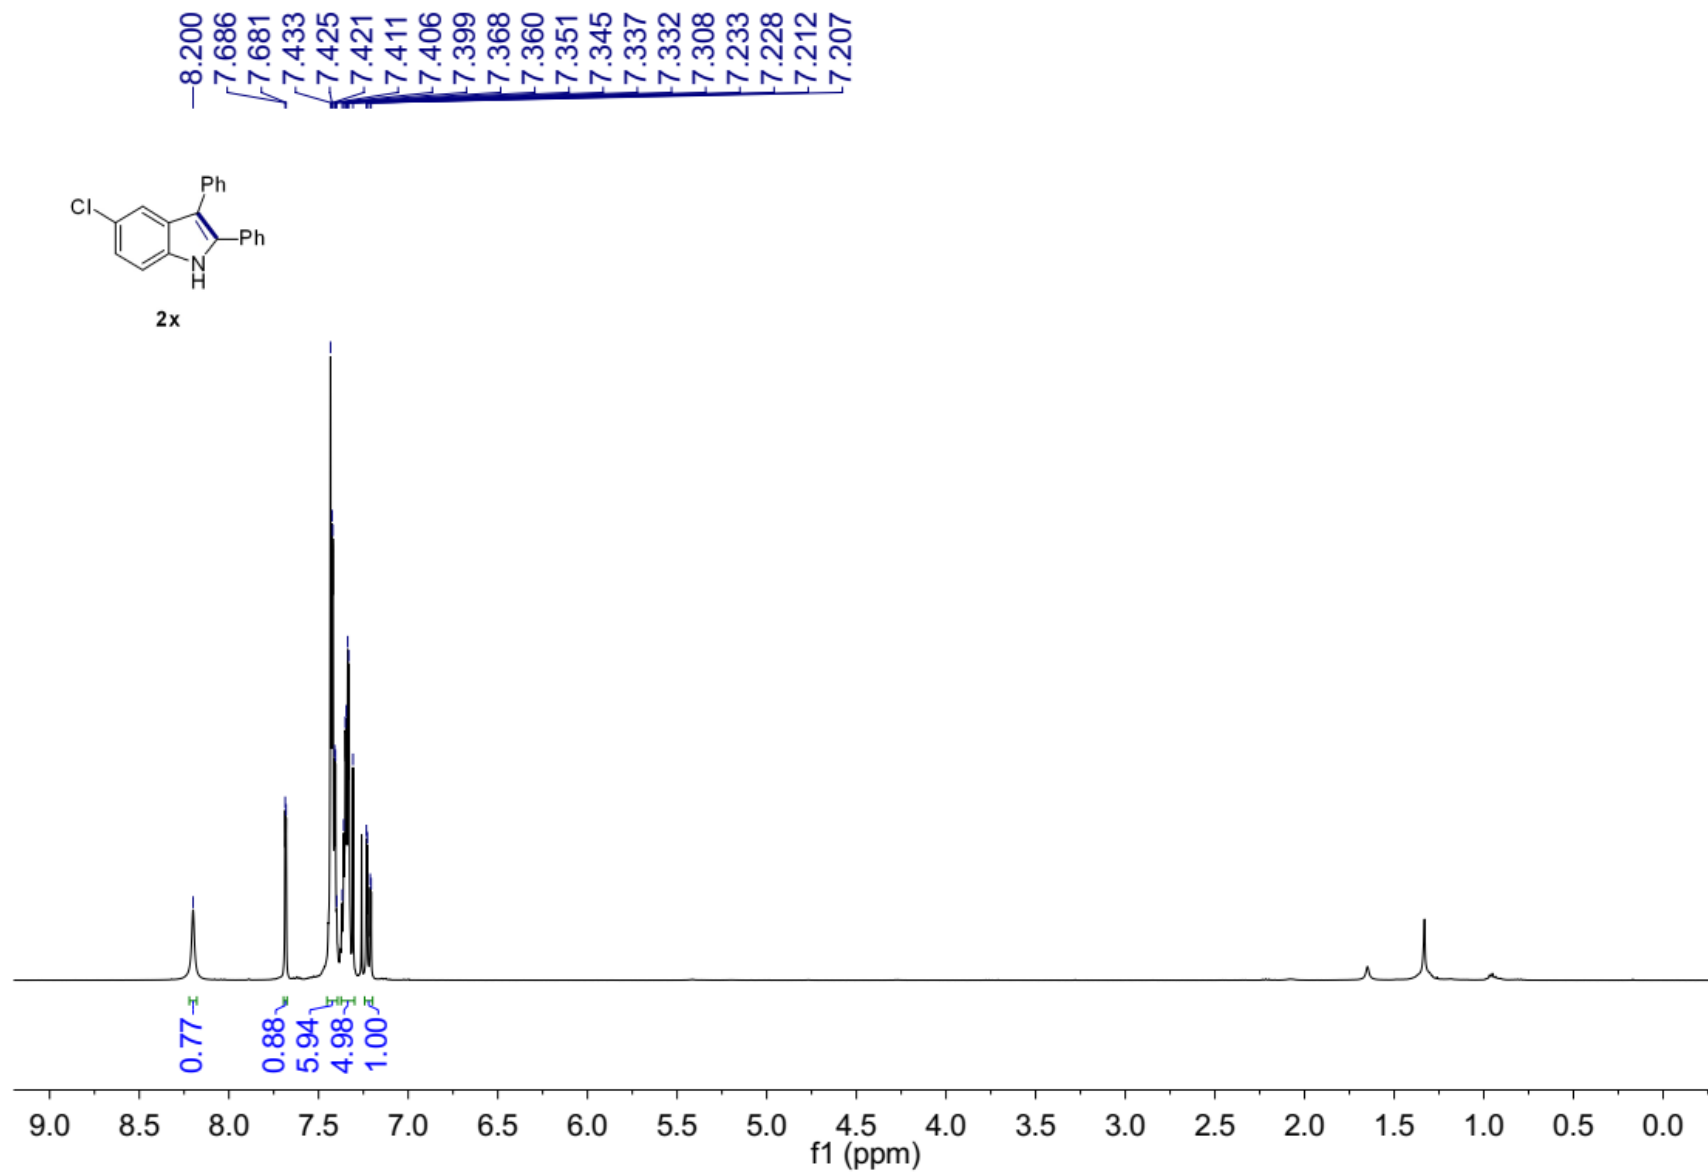

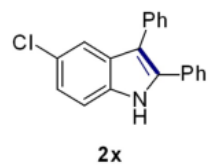

135.361  
134.319  
134.130  
132.070  
129.968  
129.833  
128.691  
128.631  
128.062  
127.972  
126.499  
126.073  
122.846  
119.035  
114.659  
111.894

77.318  
77.000  
76.683

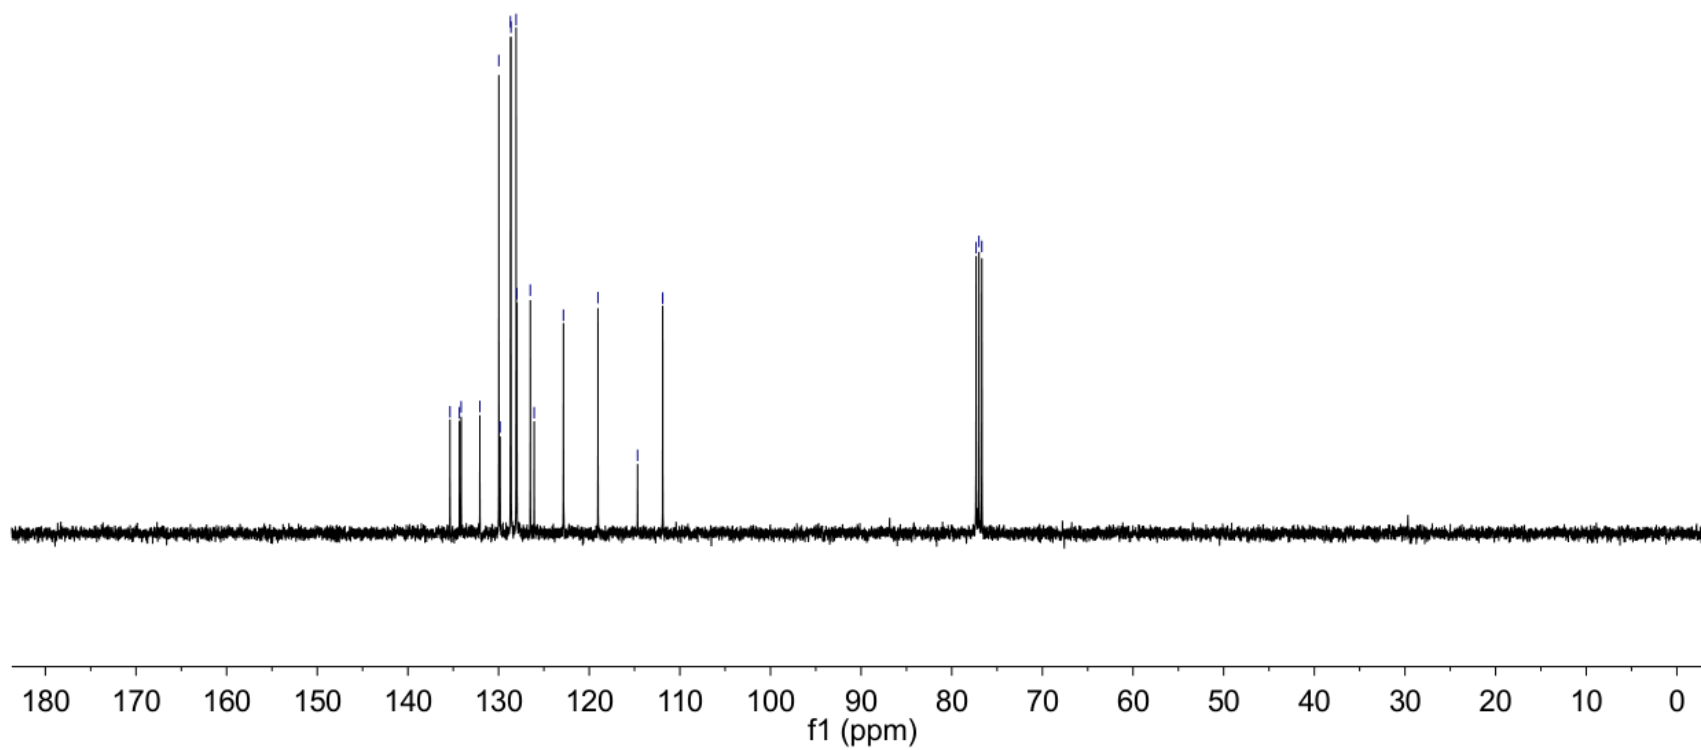

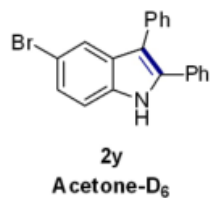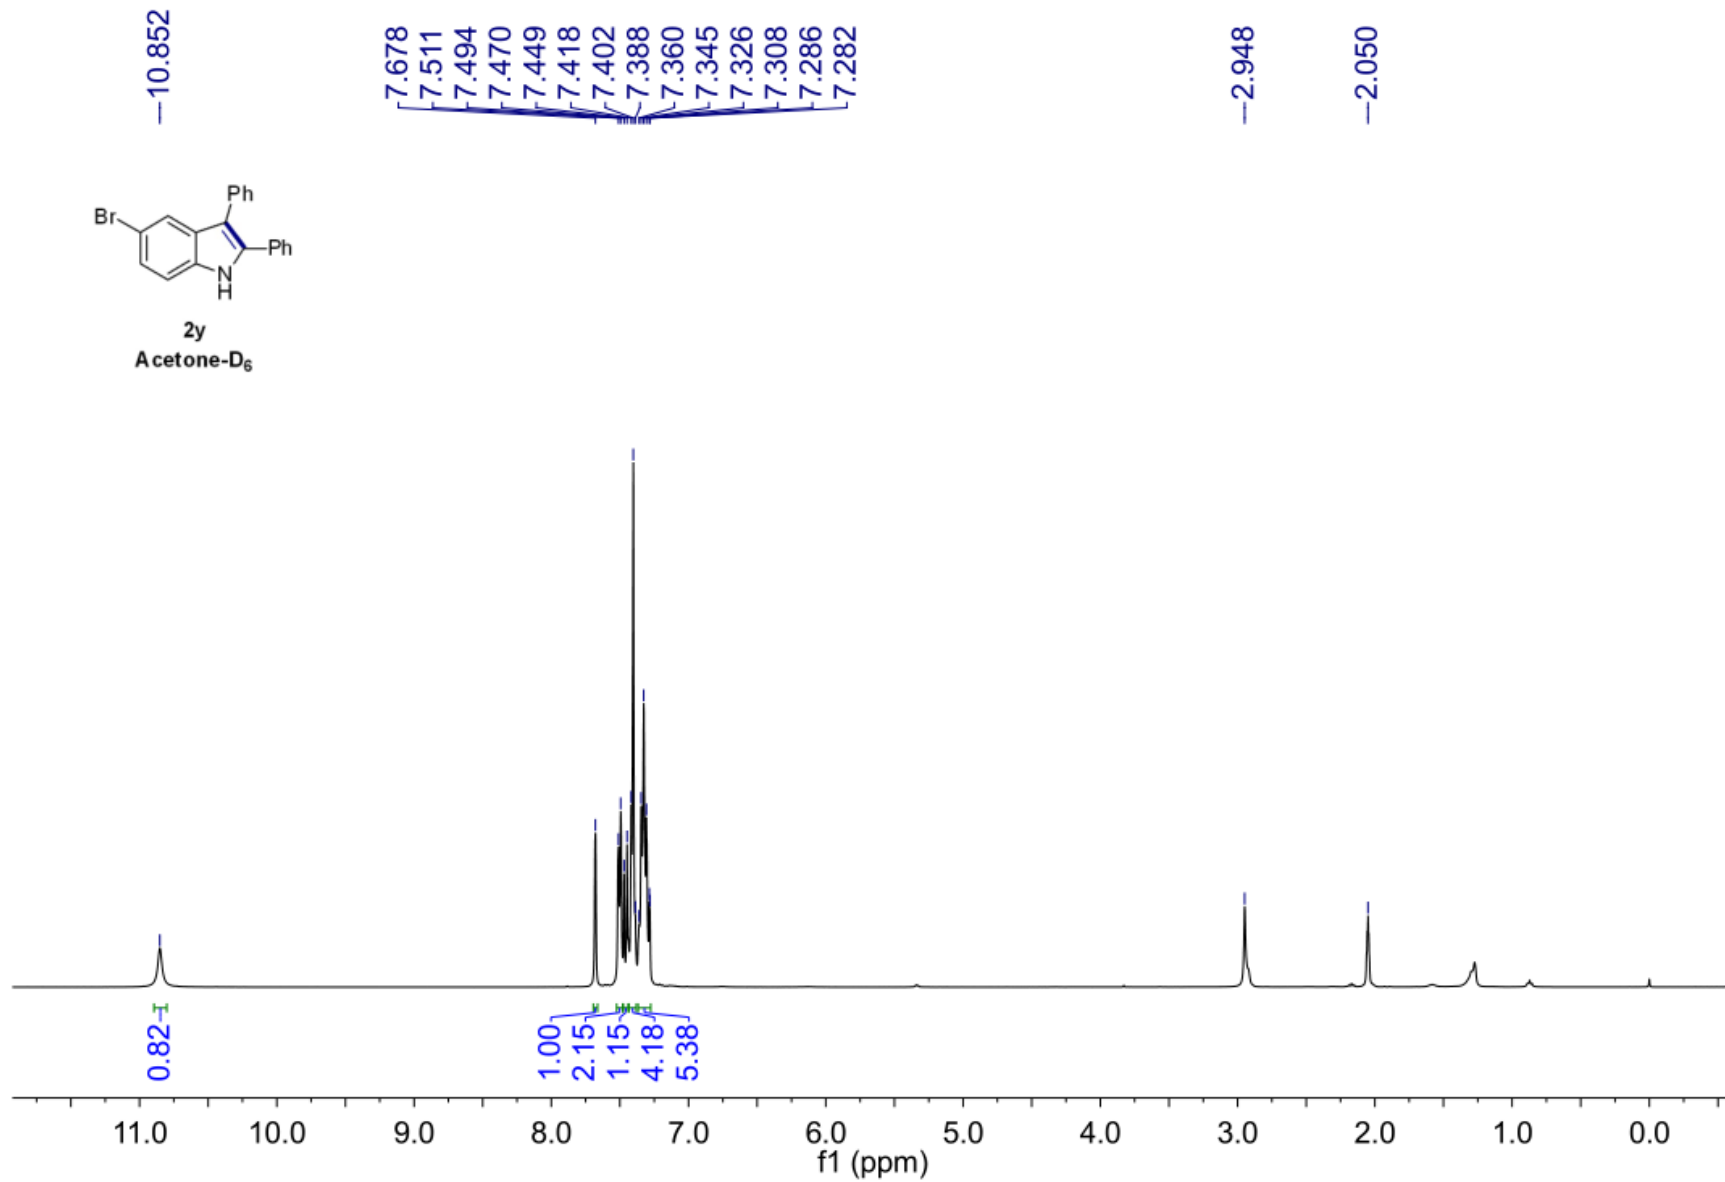

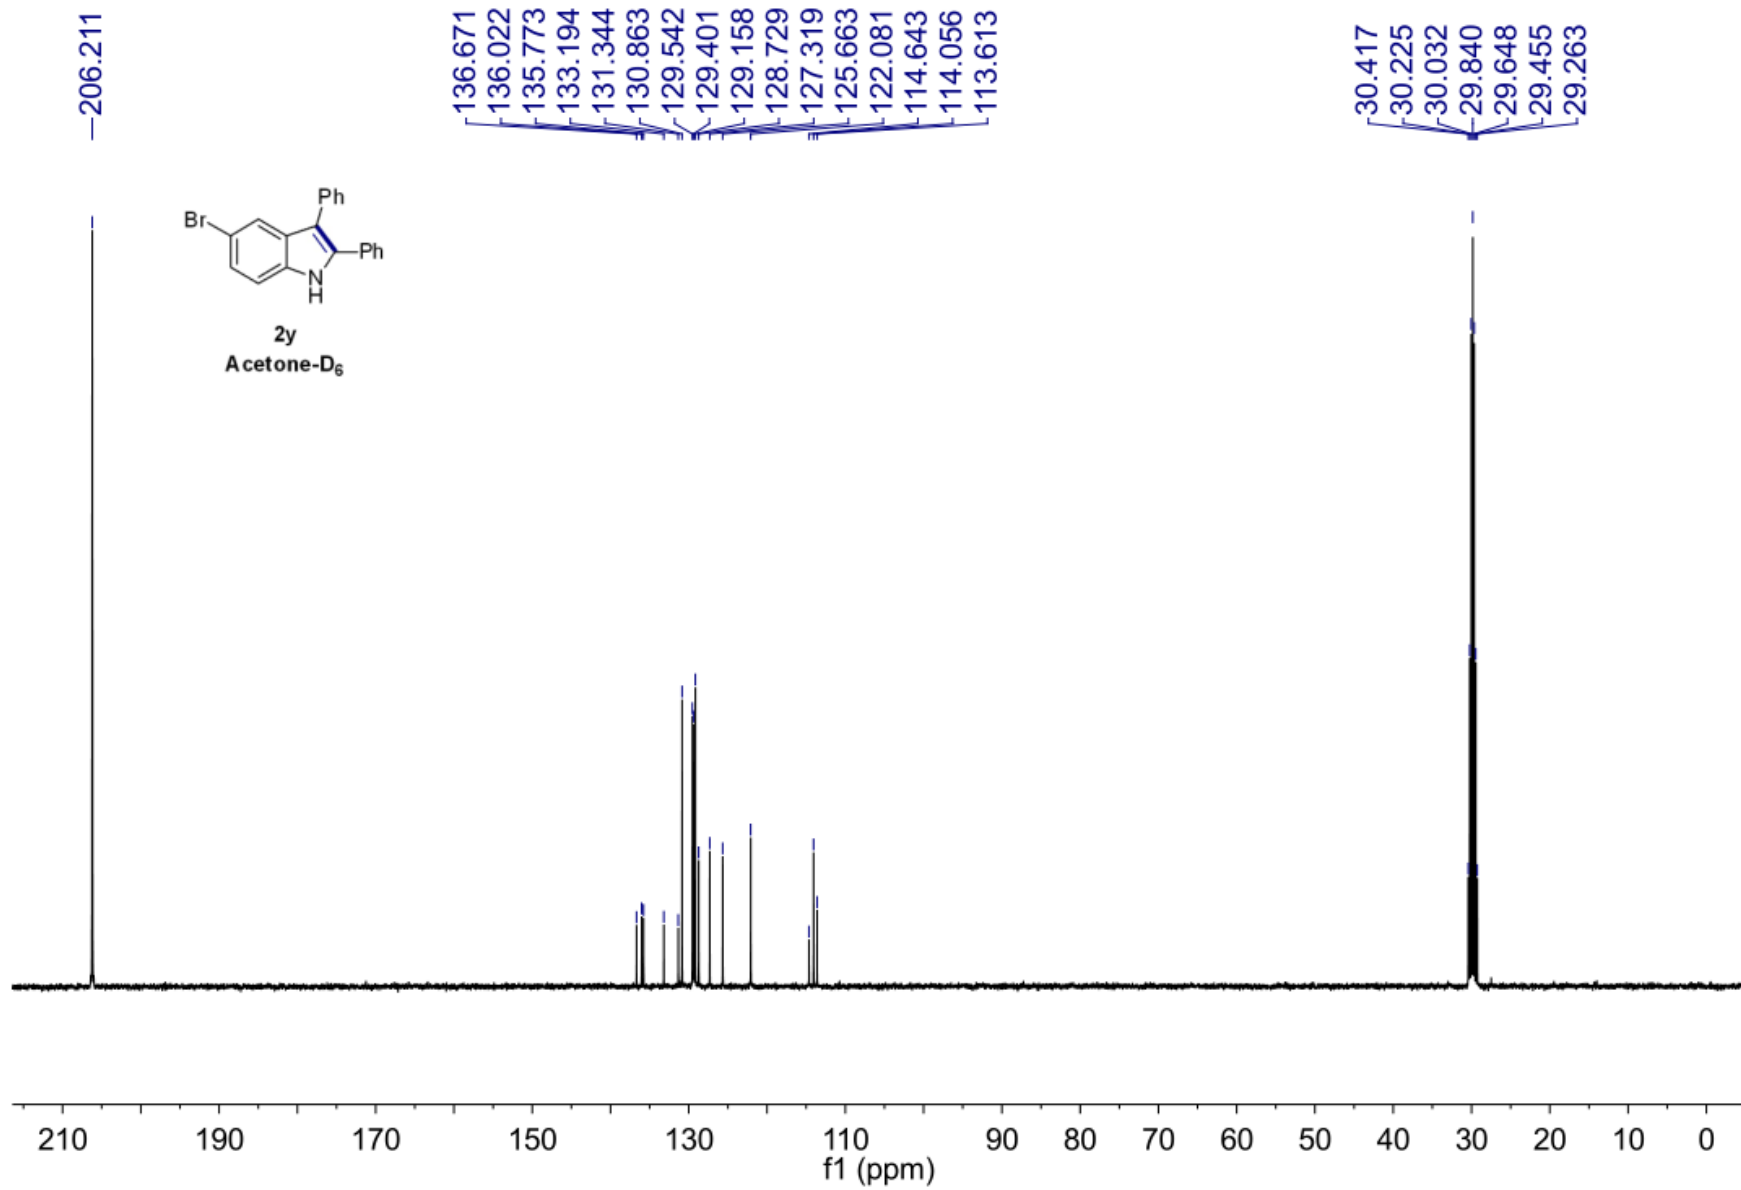

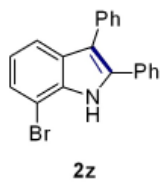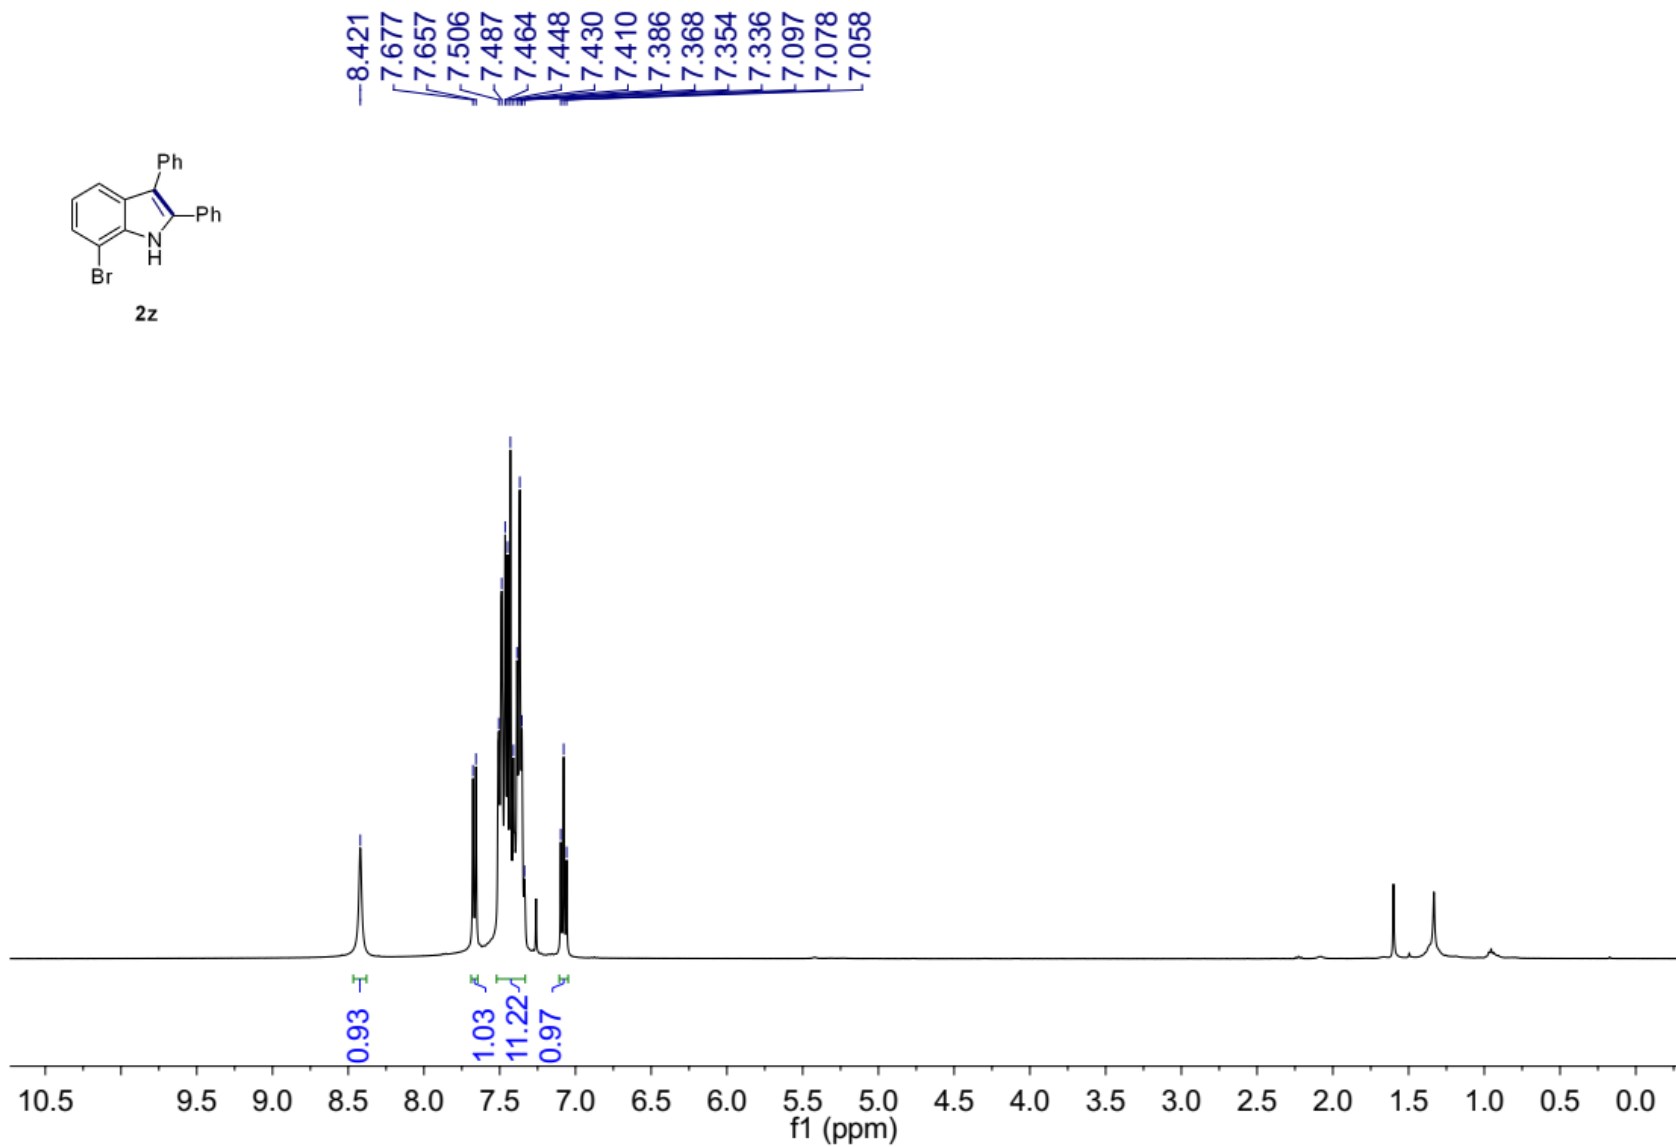

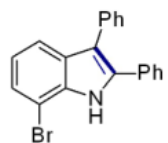

2z

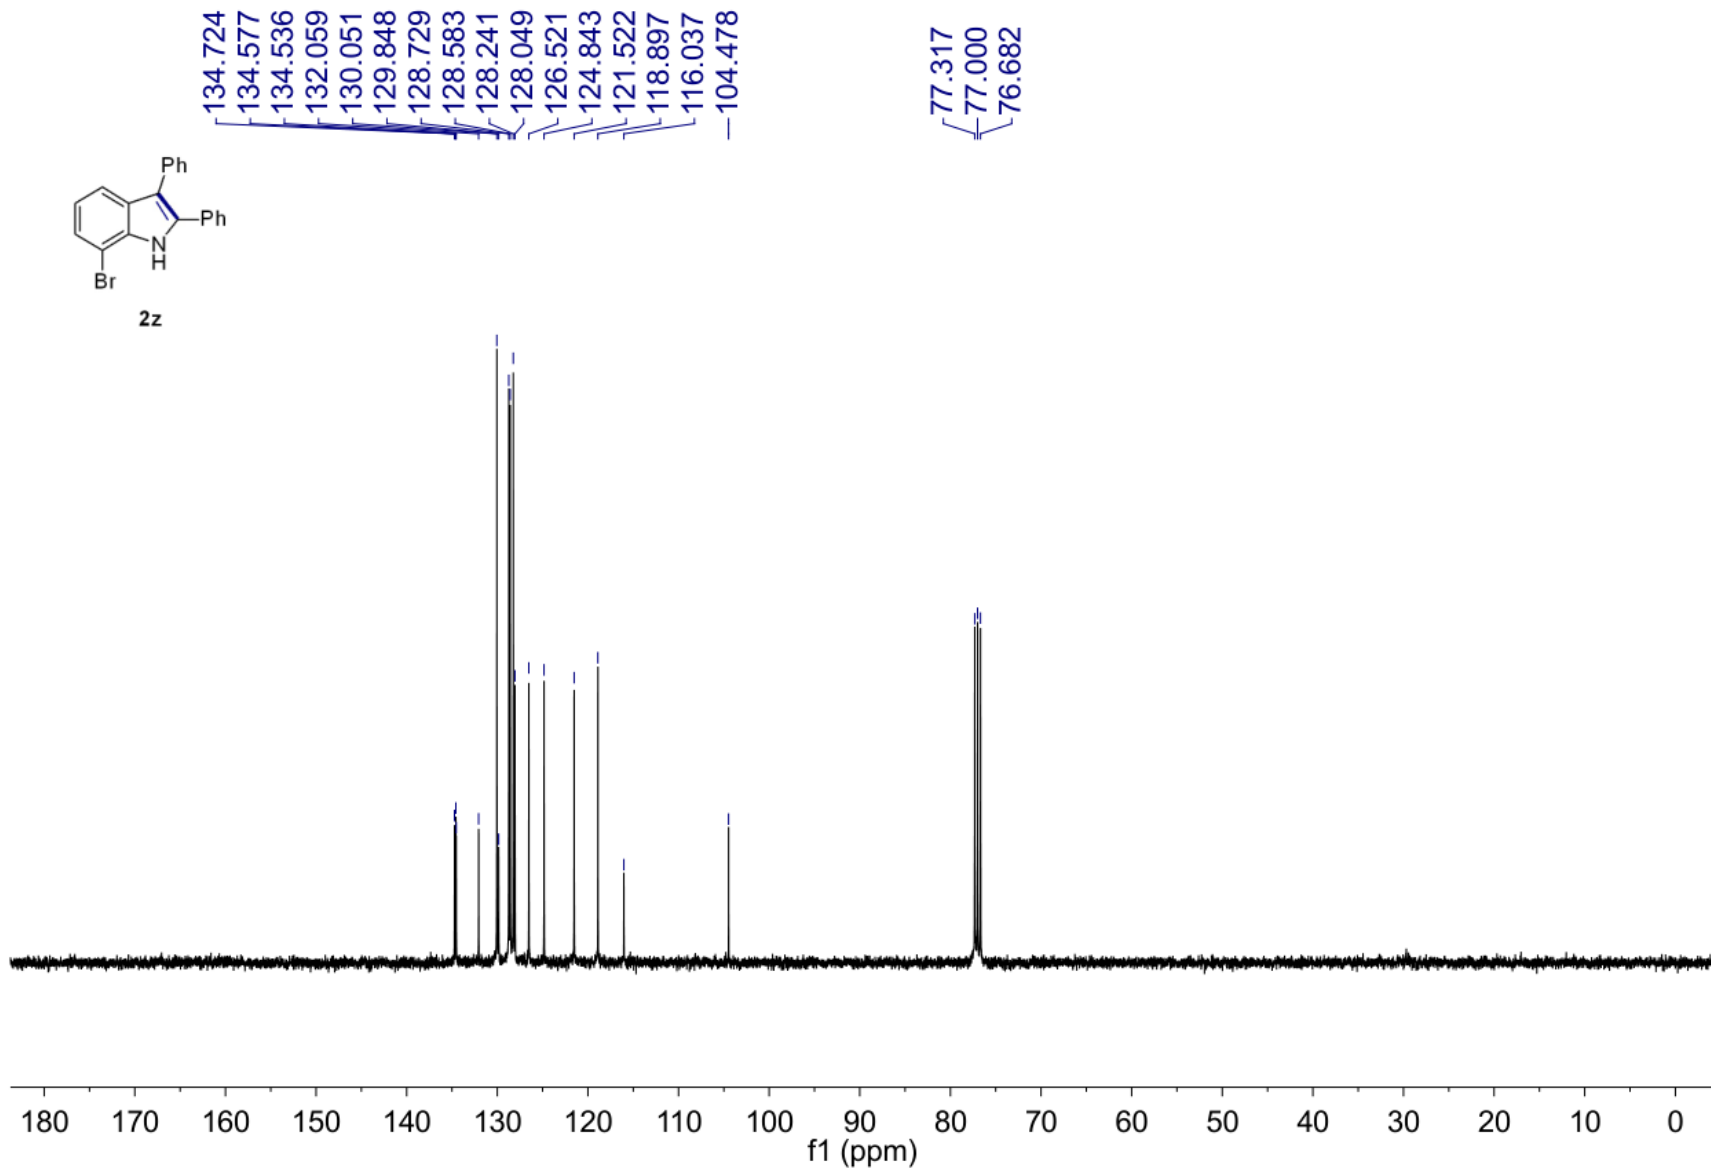



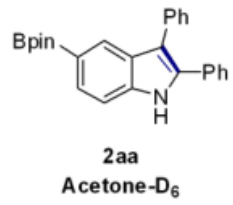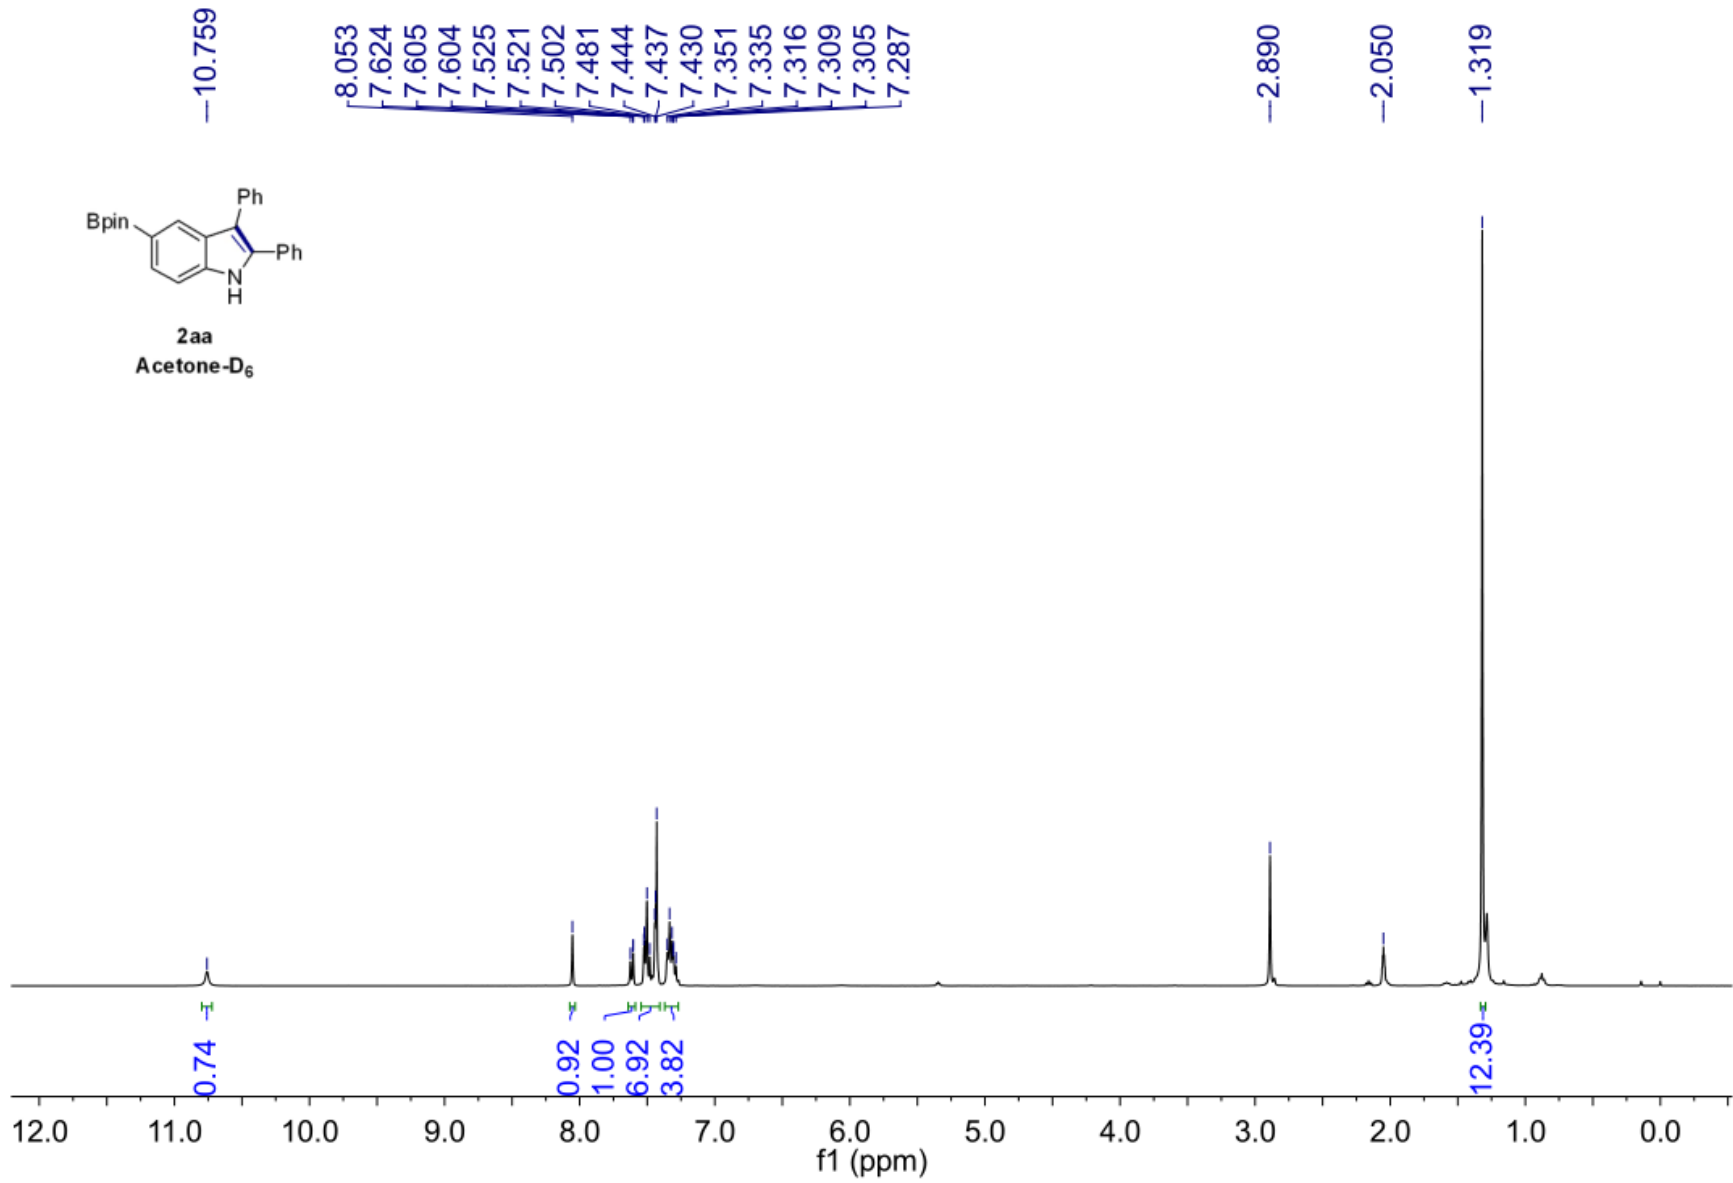

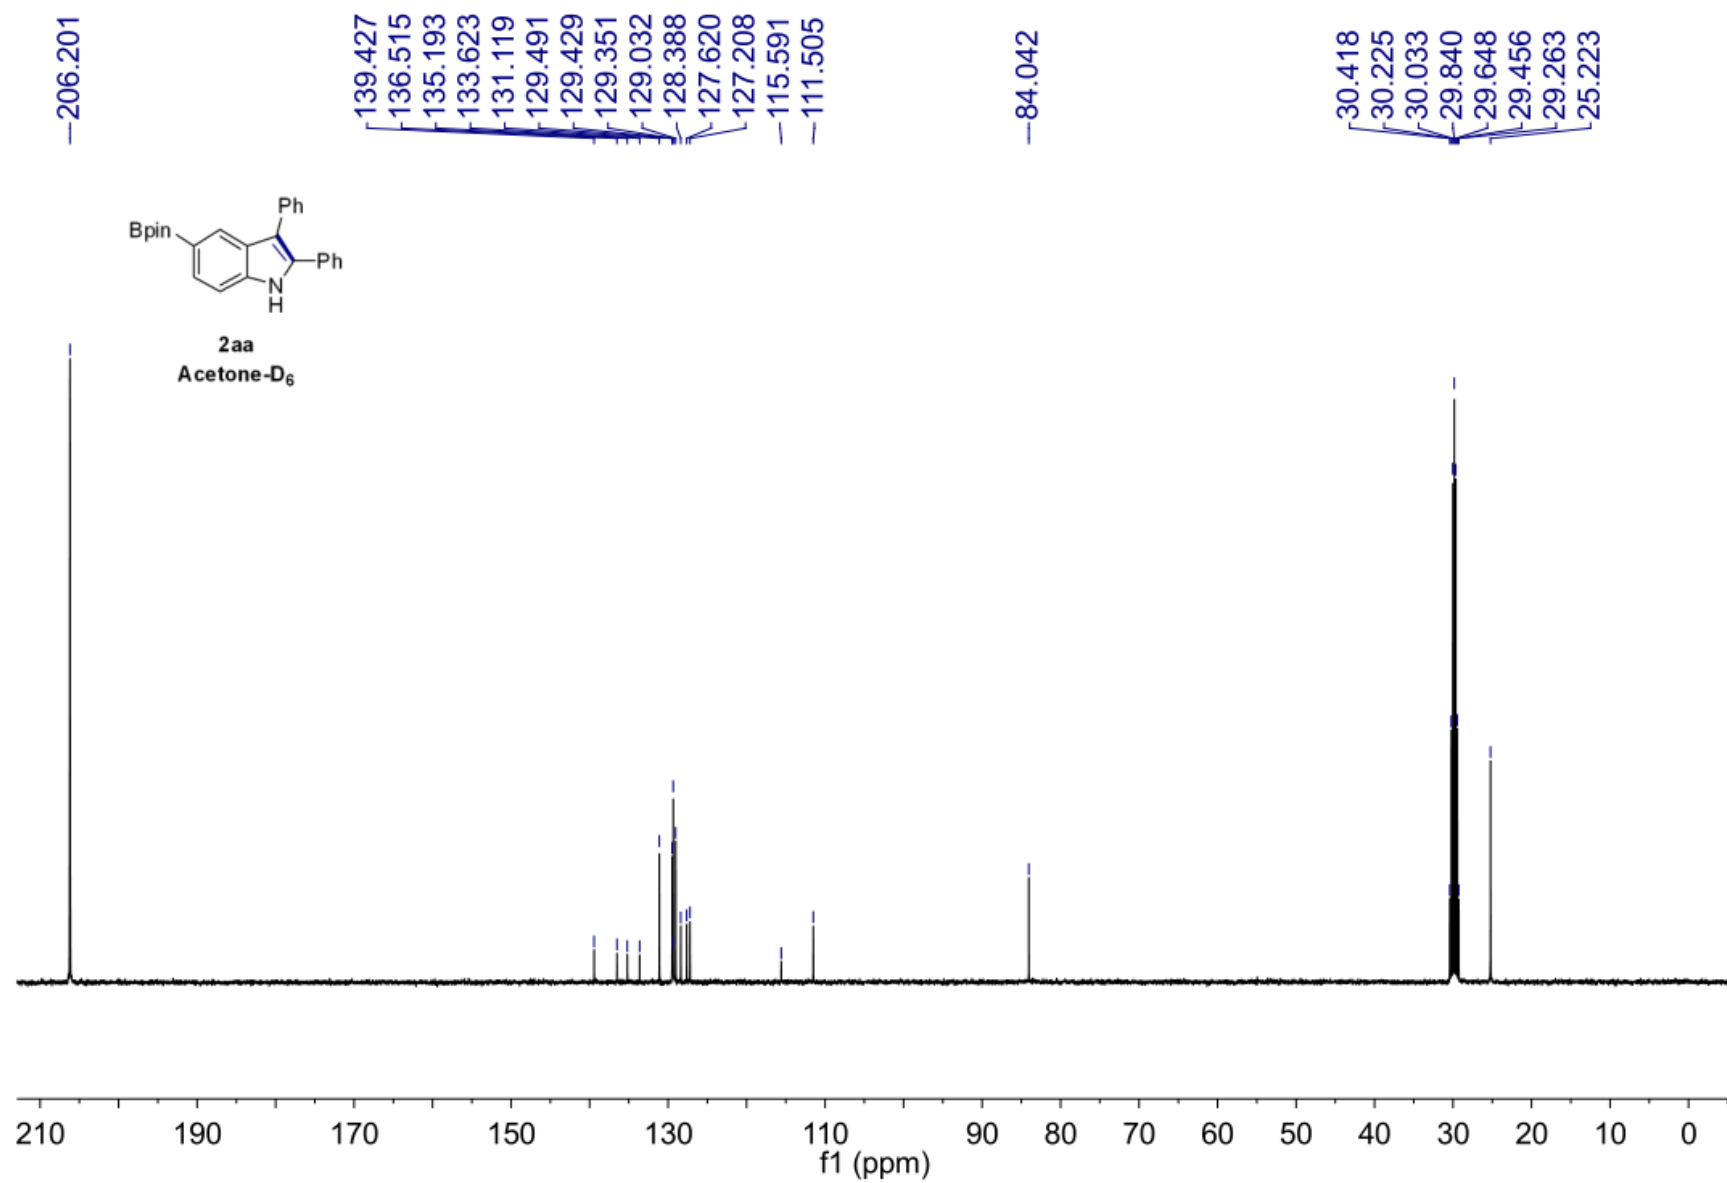

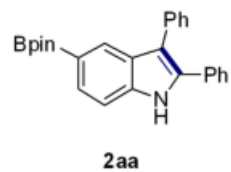

—31.105

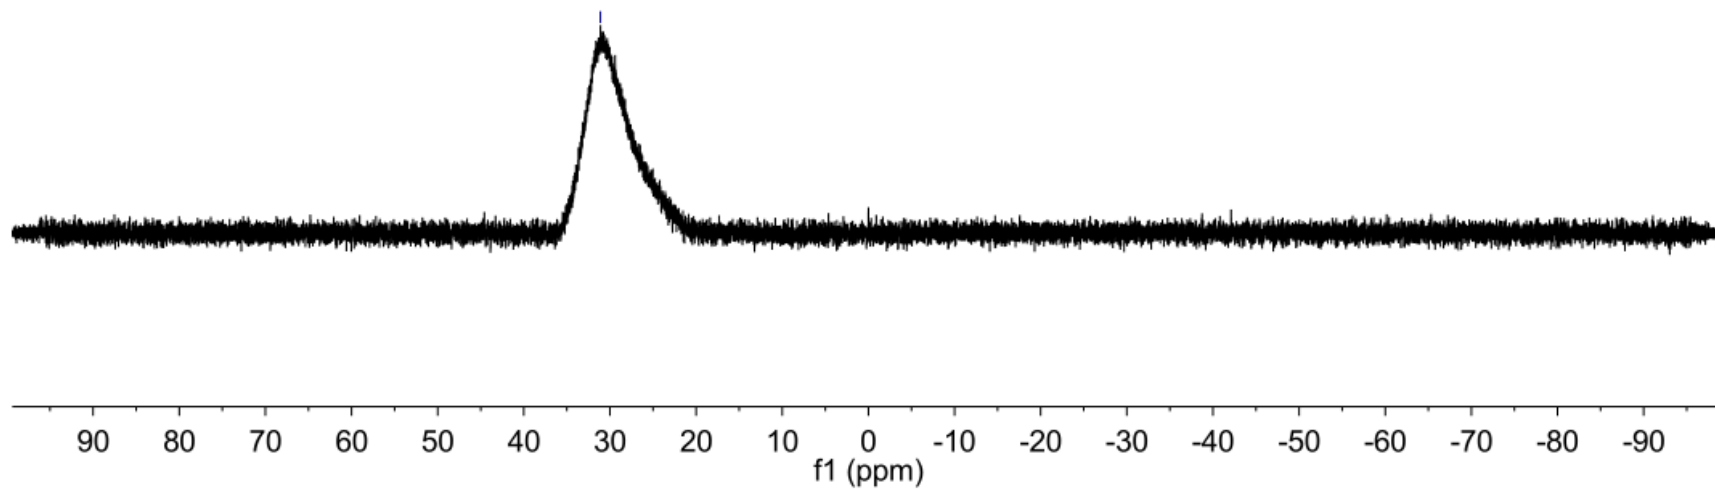

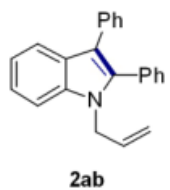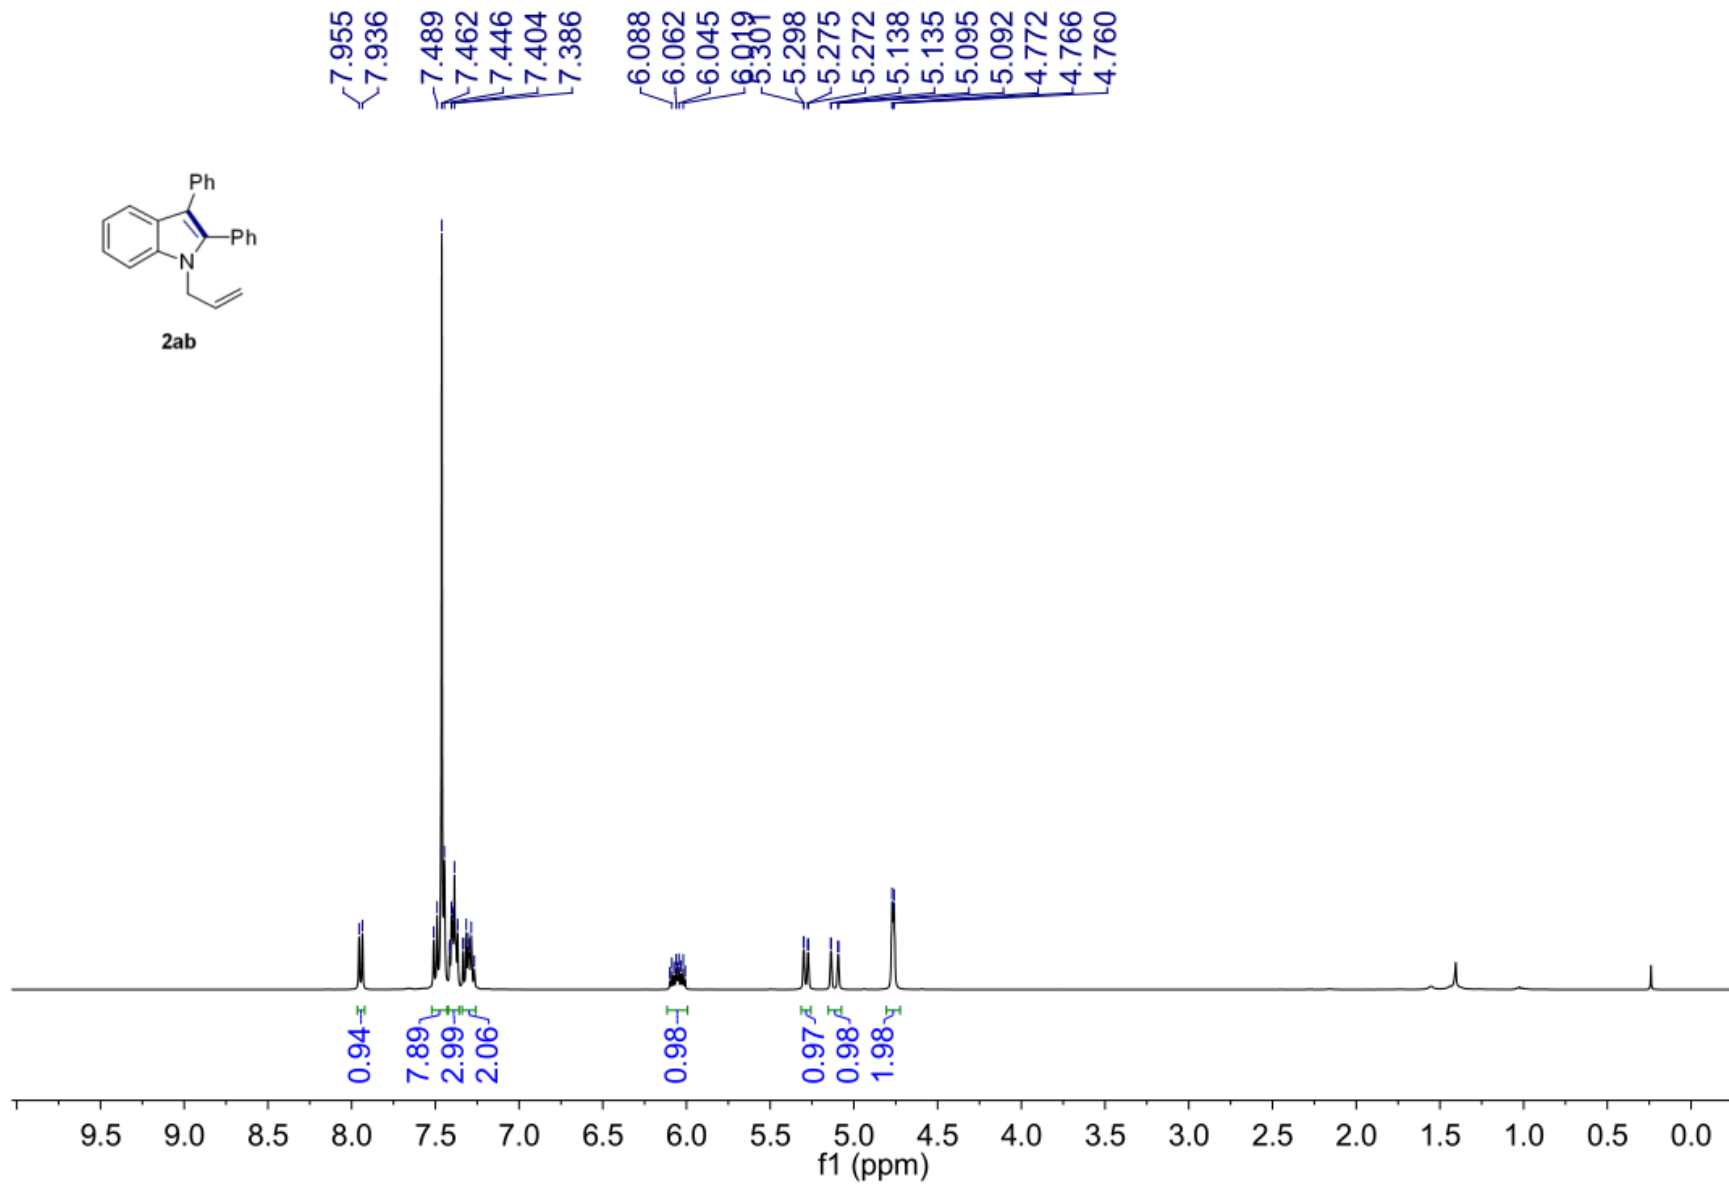

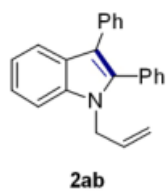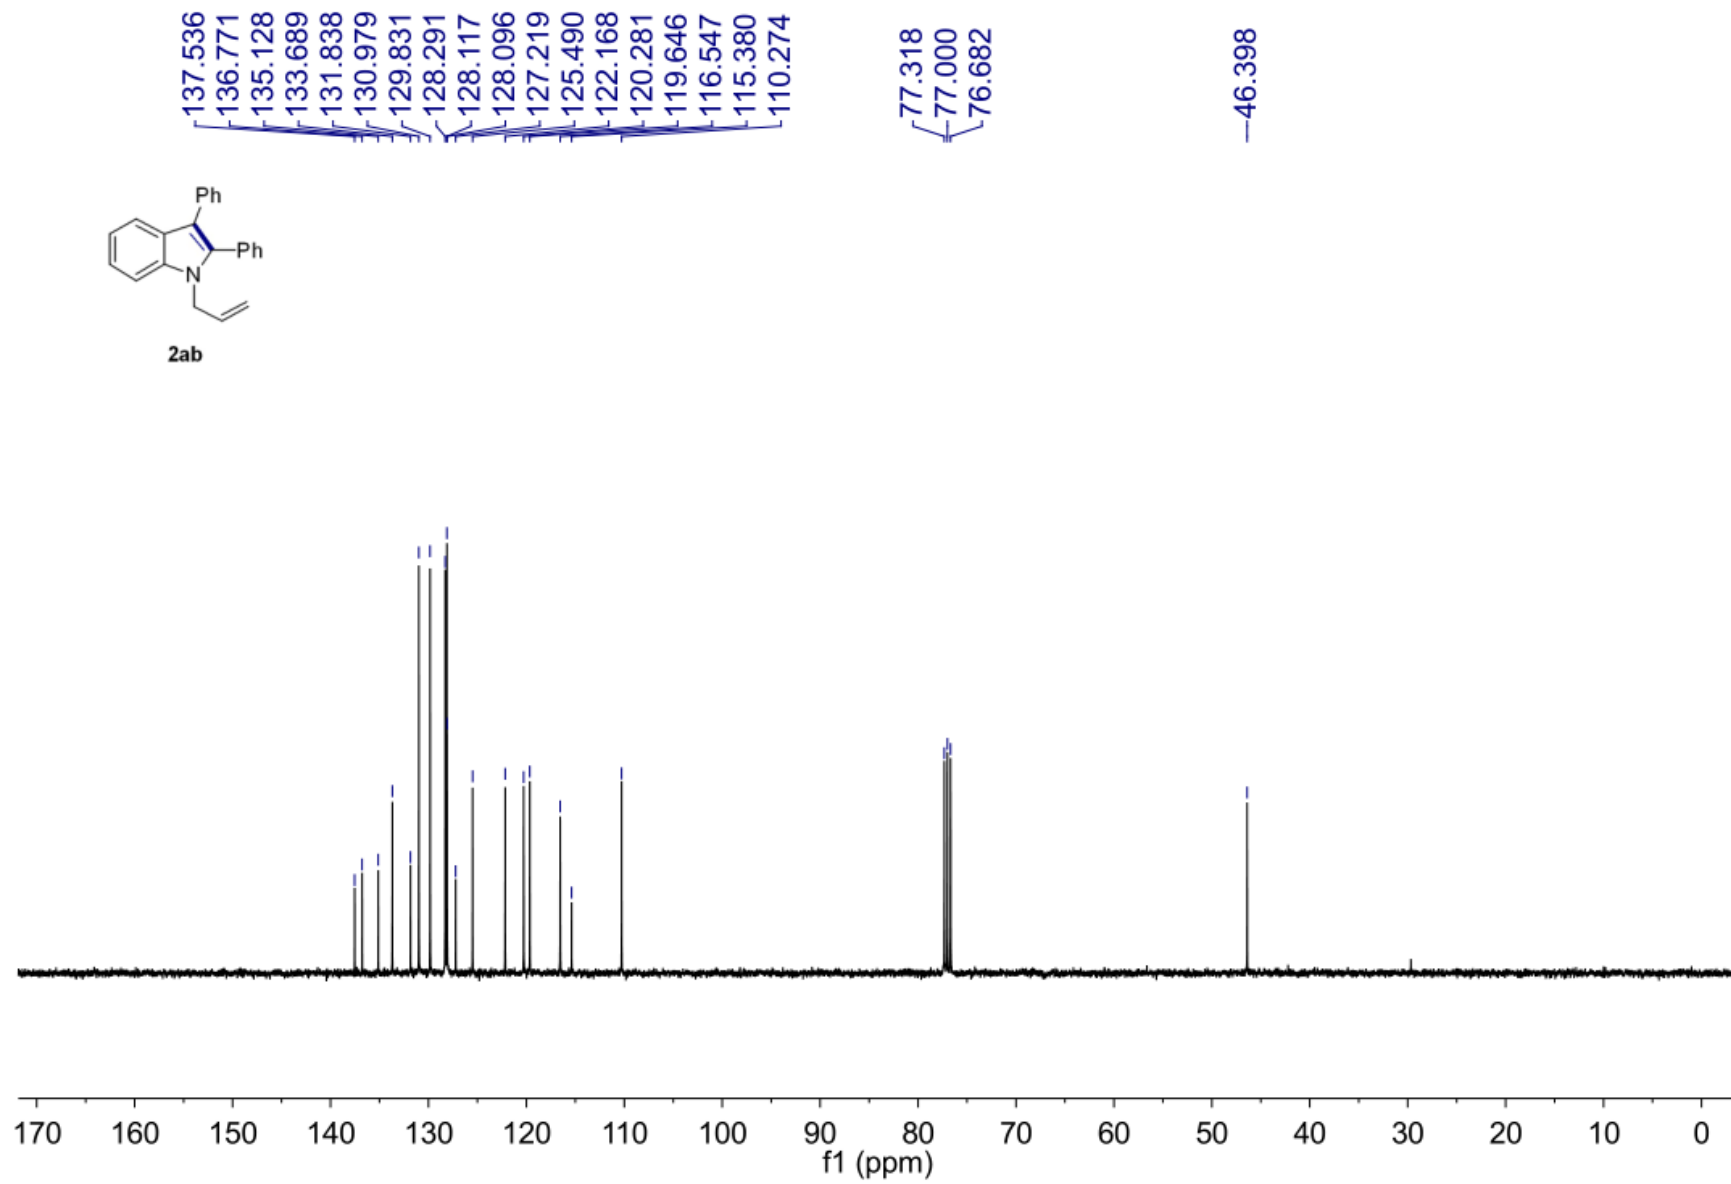

7.935  
7.915  
7.548  
7.528  
7.469  
7.447  
7.430  
7.401  
7.384  
7.347  
7.339  
7.310  
7.284  
7.265  
7.246  
6.454  
6.414  
6.404  
6.394  
6.382  
6.364  
6.354  
6.342  
4.908  
4.898

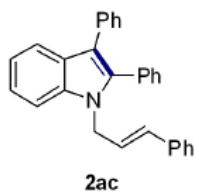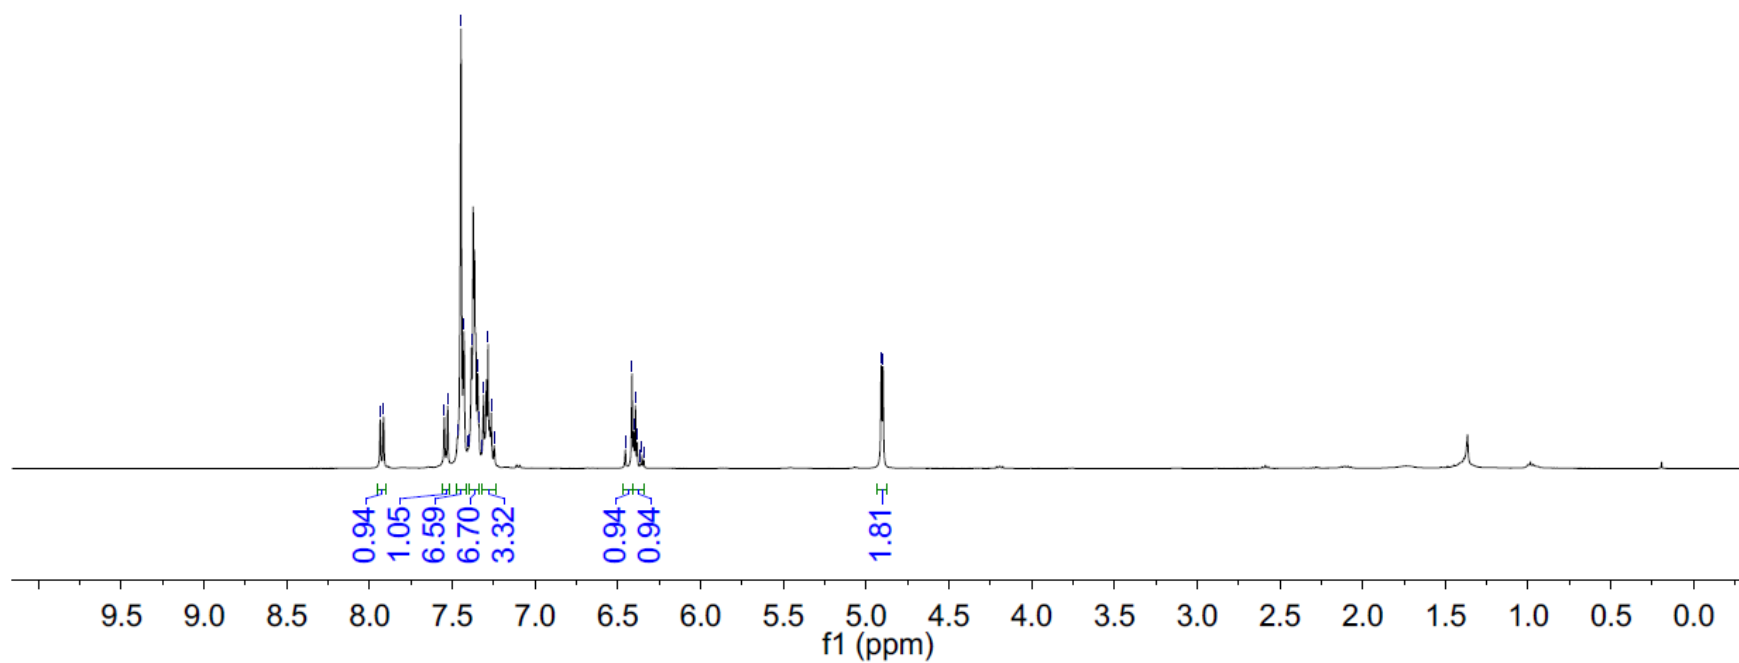

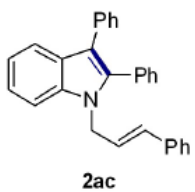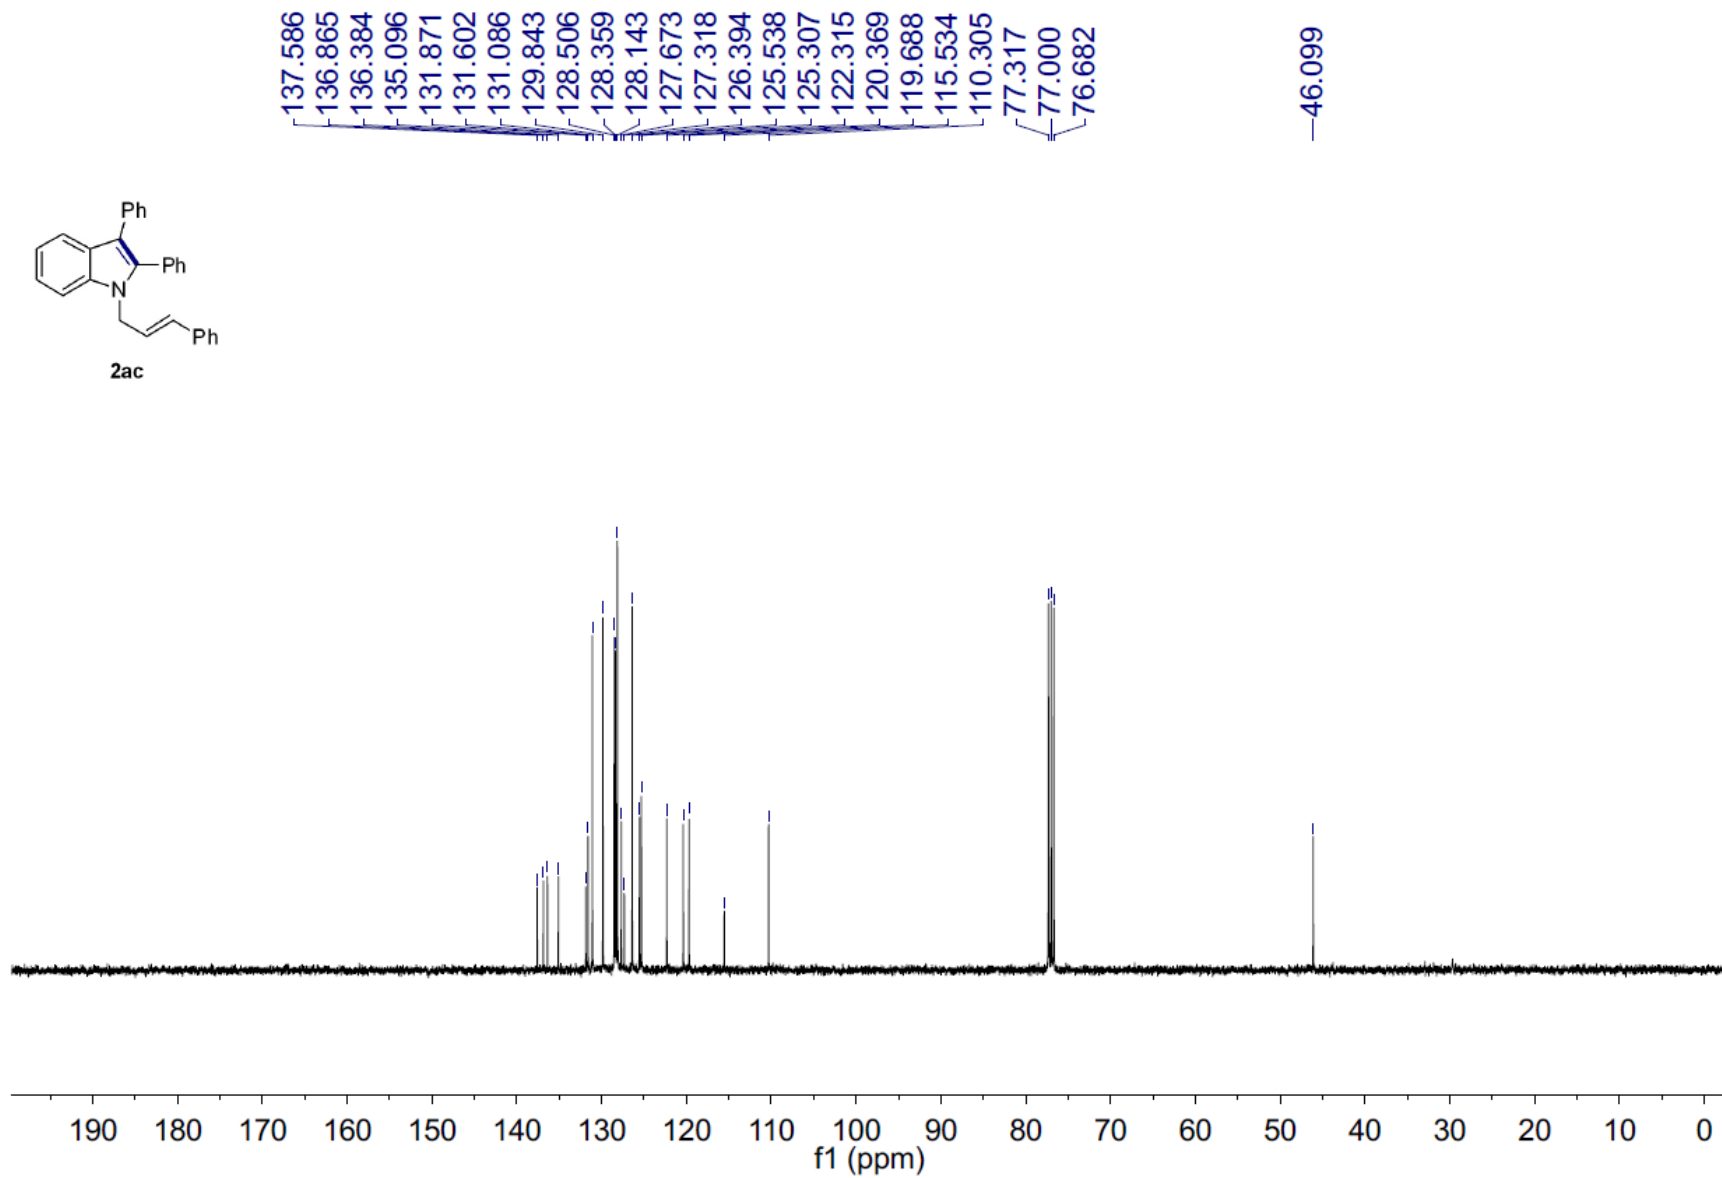

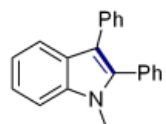

2ad

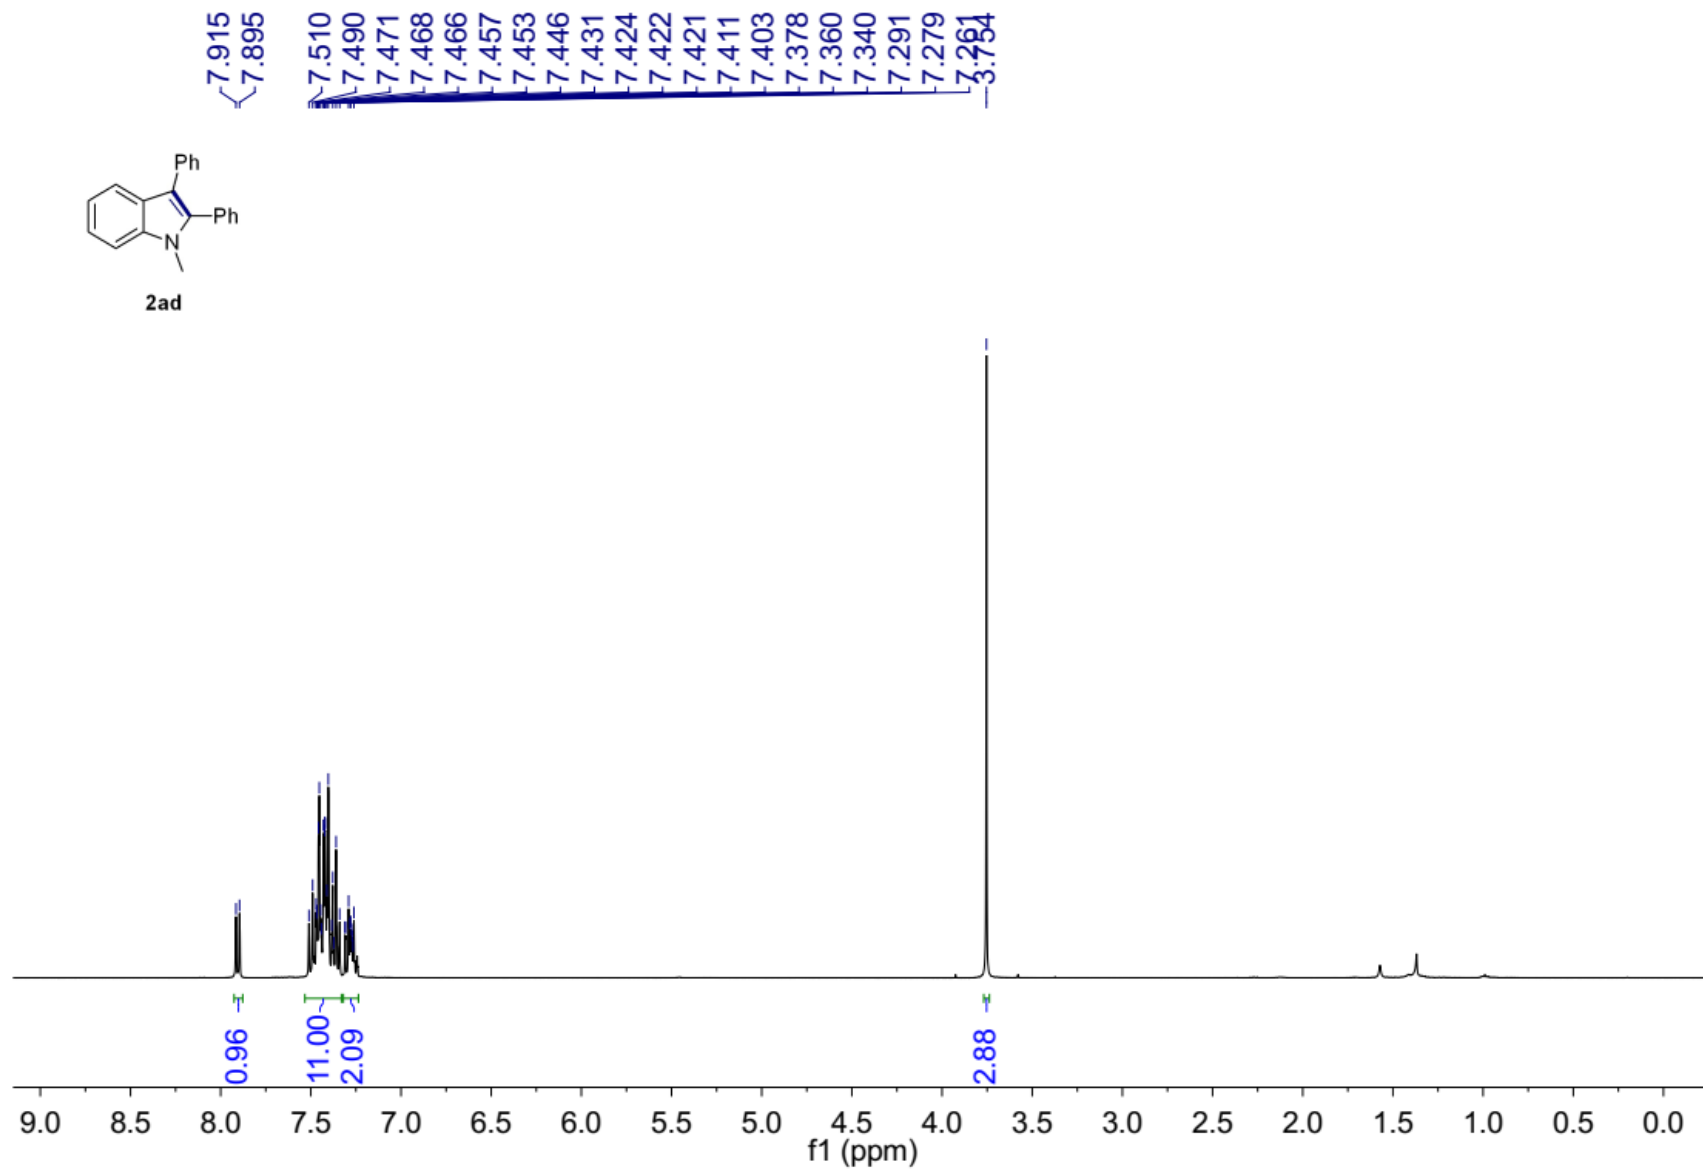



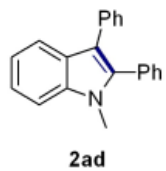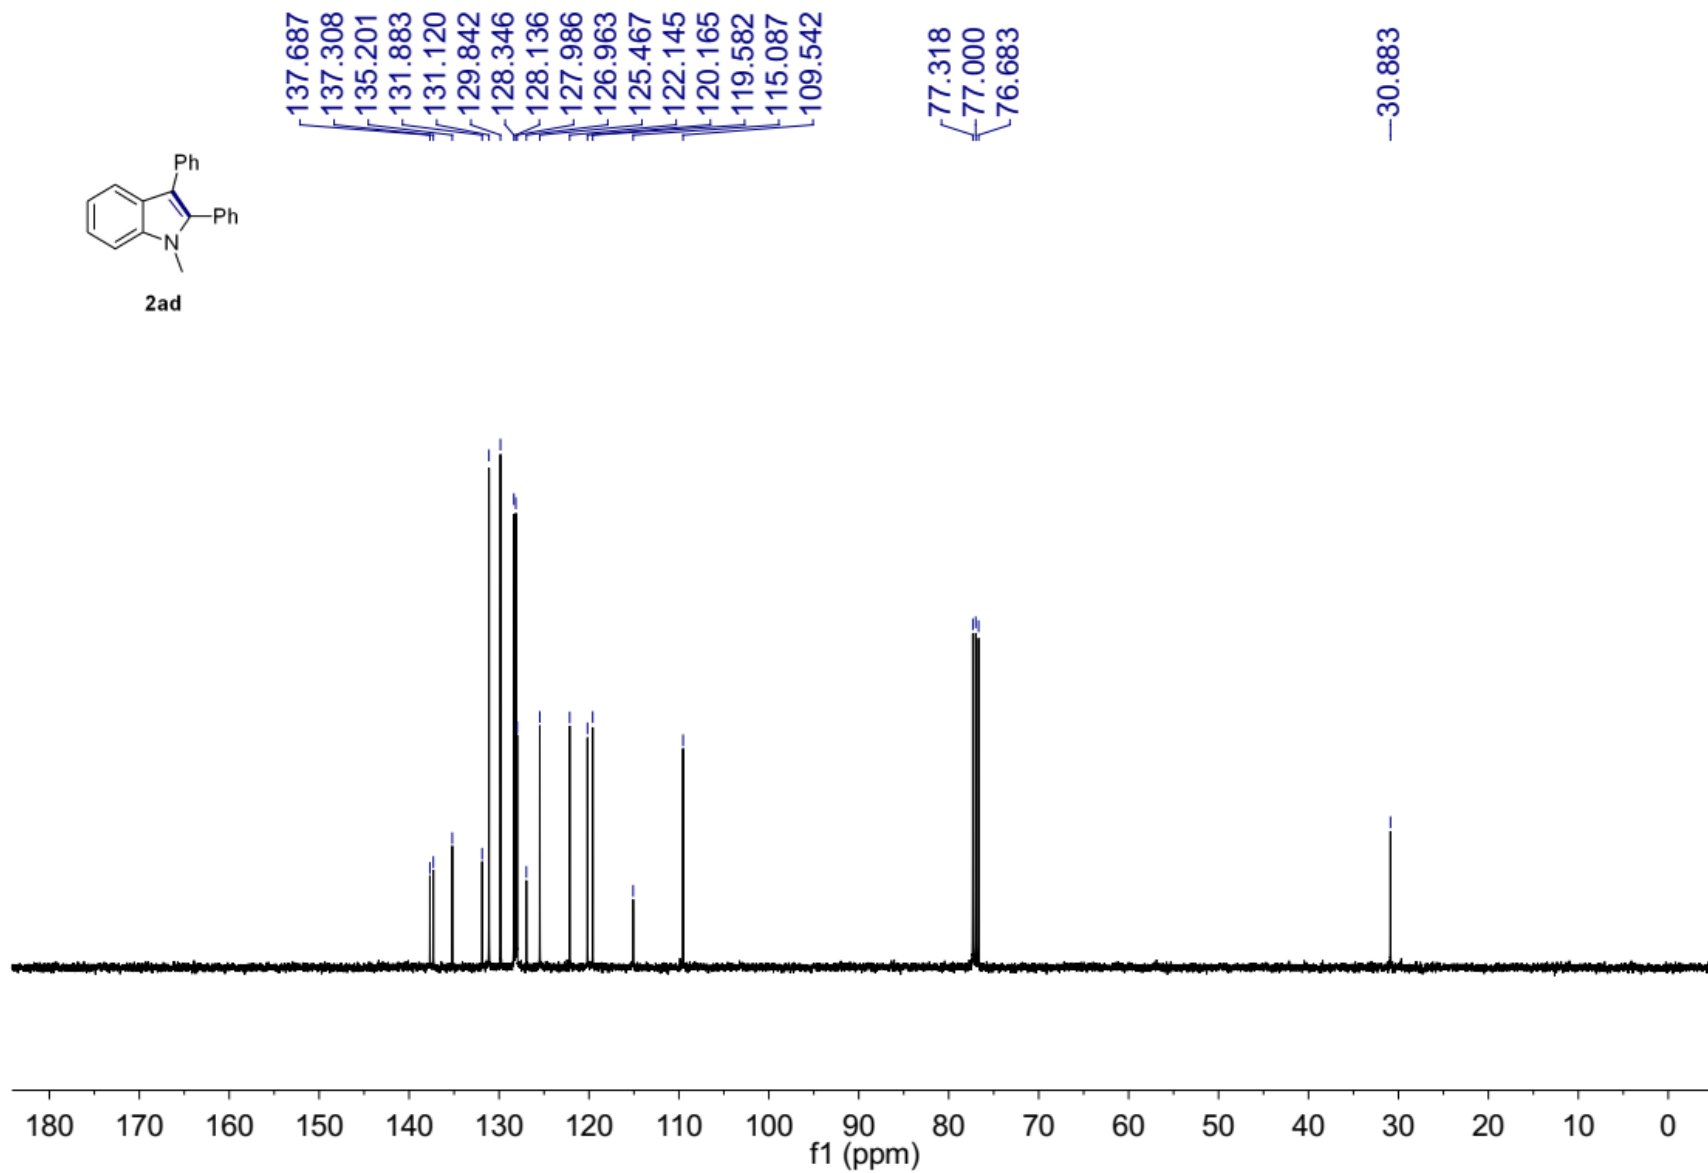

7.725  
7.720  
7.705  
7.701  
7.616  
7.596  
7.571  
7.567  
7.561  
7.550  
7.546  
7.534  
7.532  
7.514  
7.495  
7.473  
7.469  
7.465  
7.458  
7.451  
7.401  
7.398  
7.379  
7.363  
7.360  
7.350  
7.346  
7.332  
7.329  
7.306  
7.304  
7.285  
7.269  
7.267

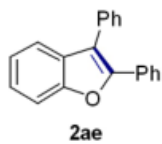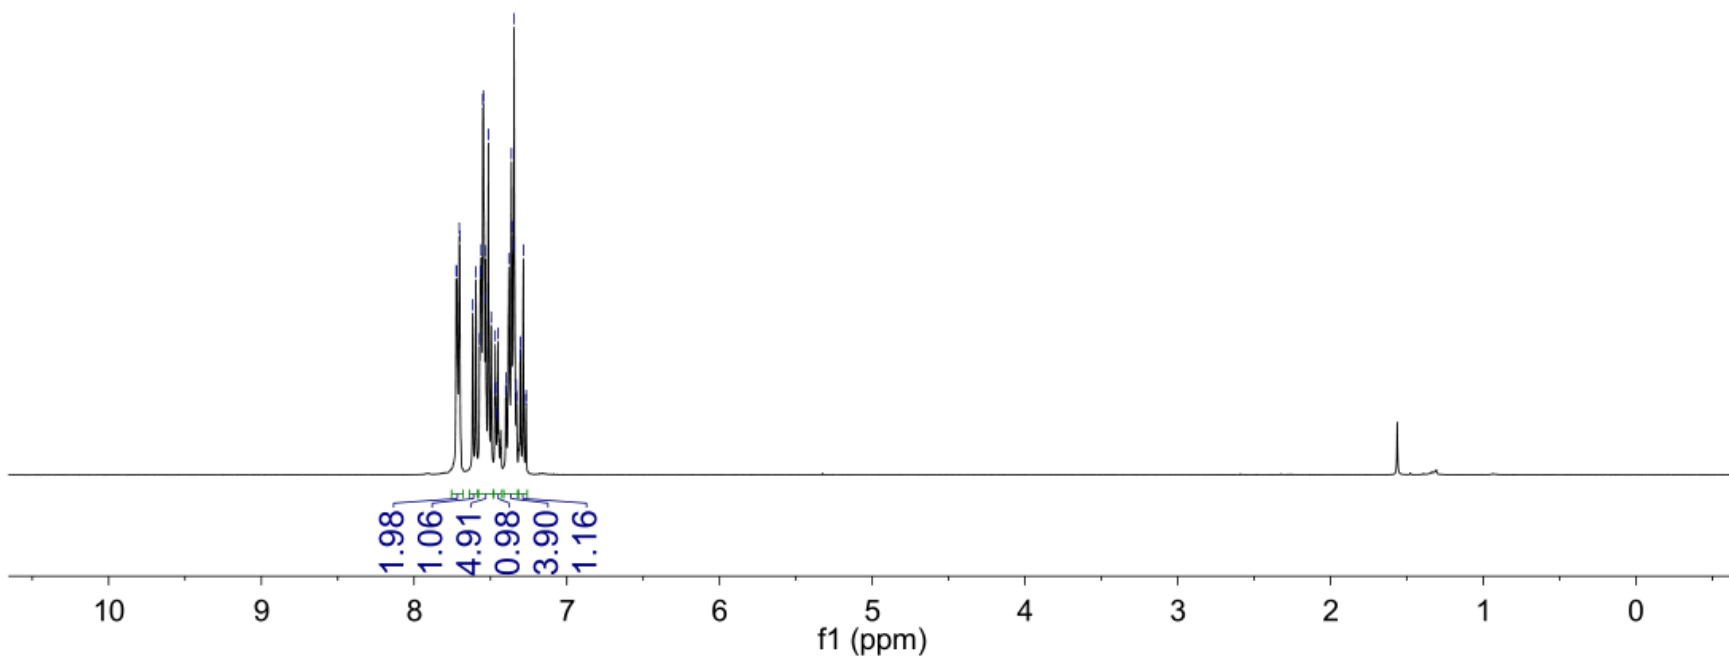

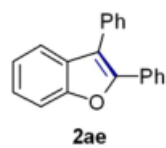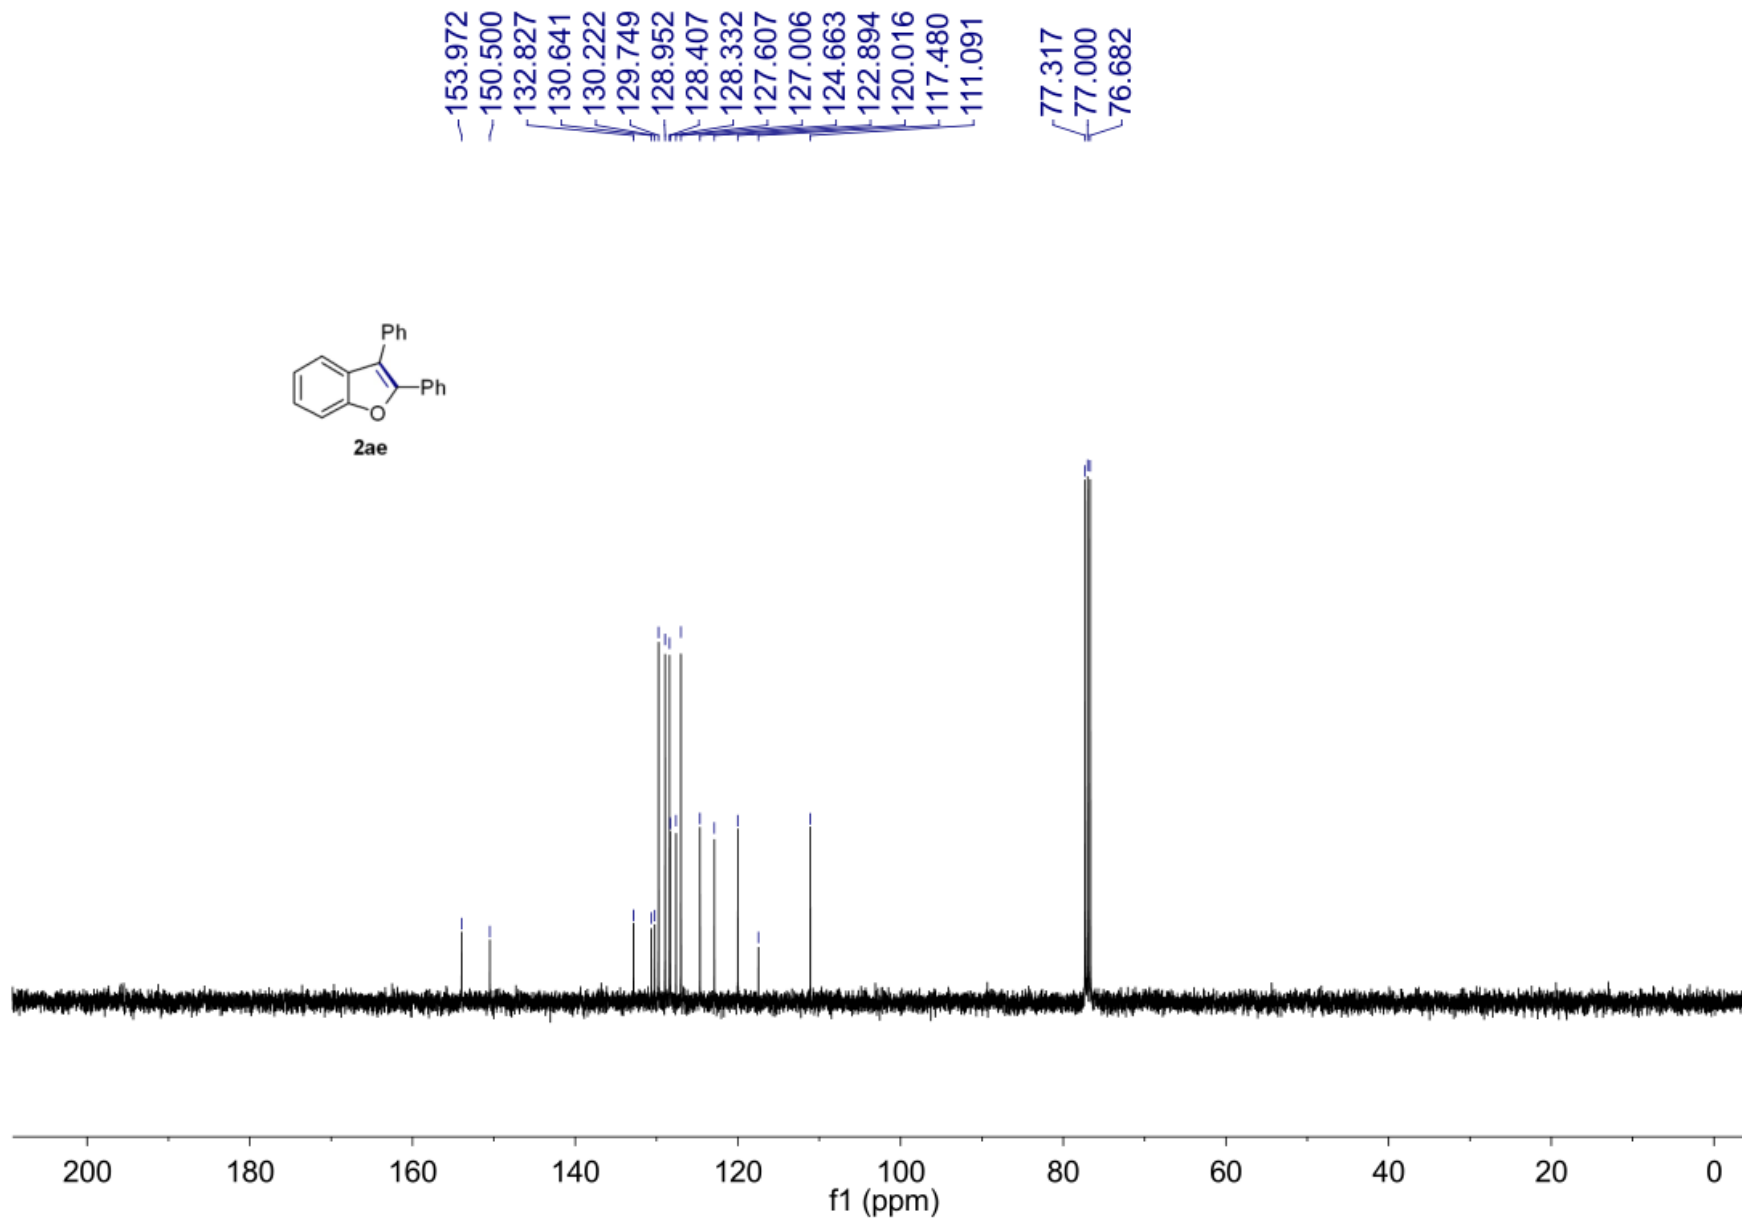

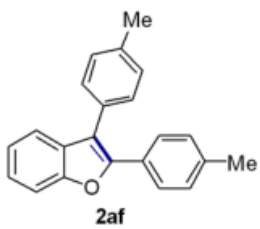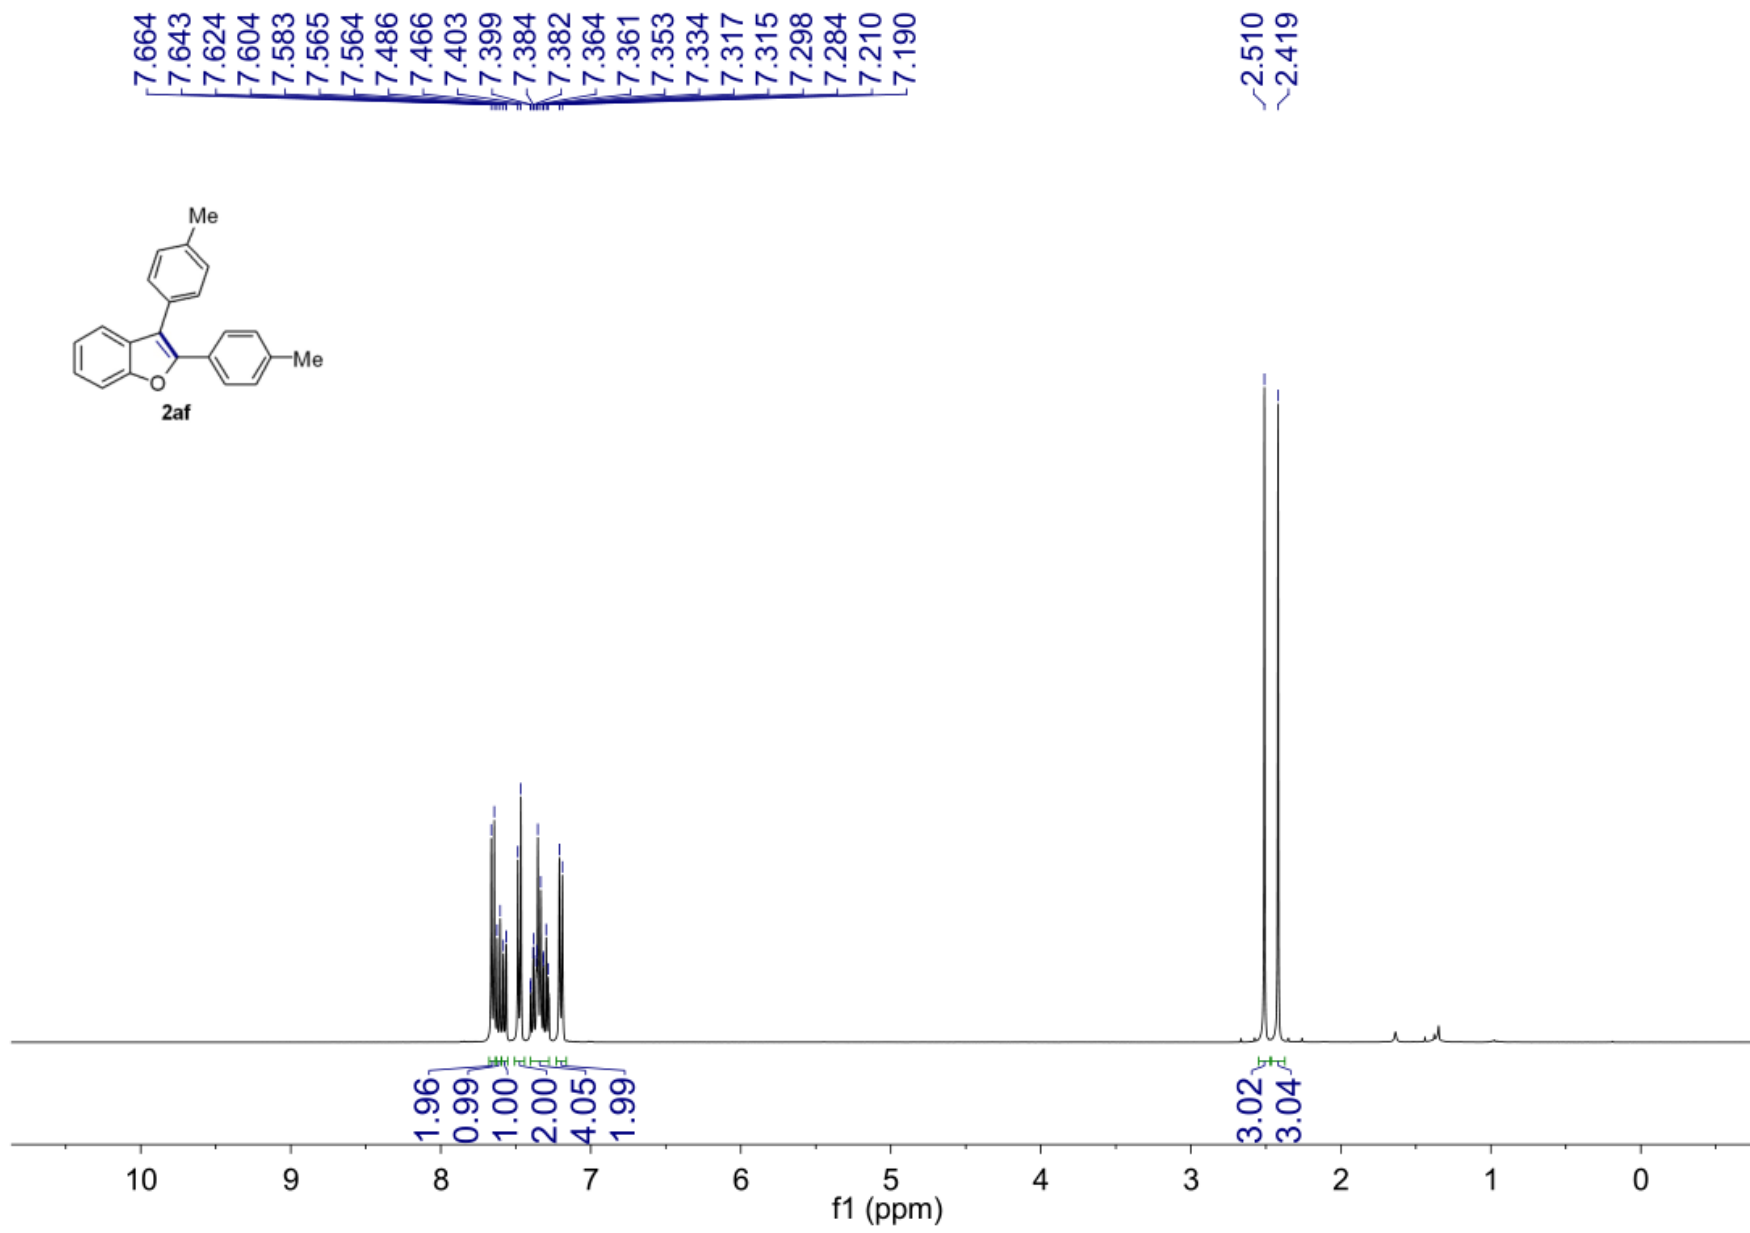

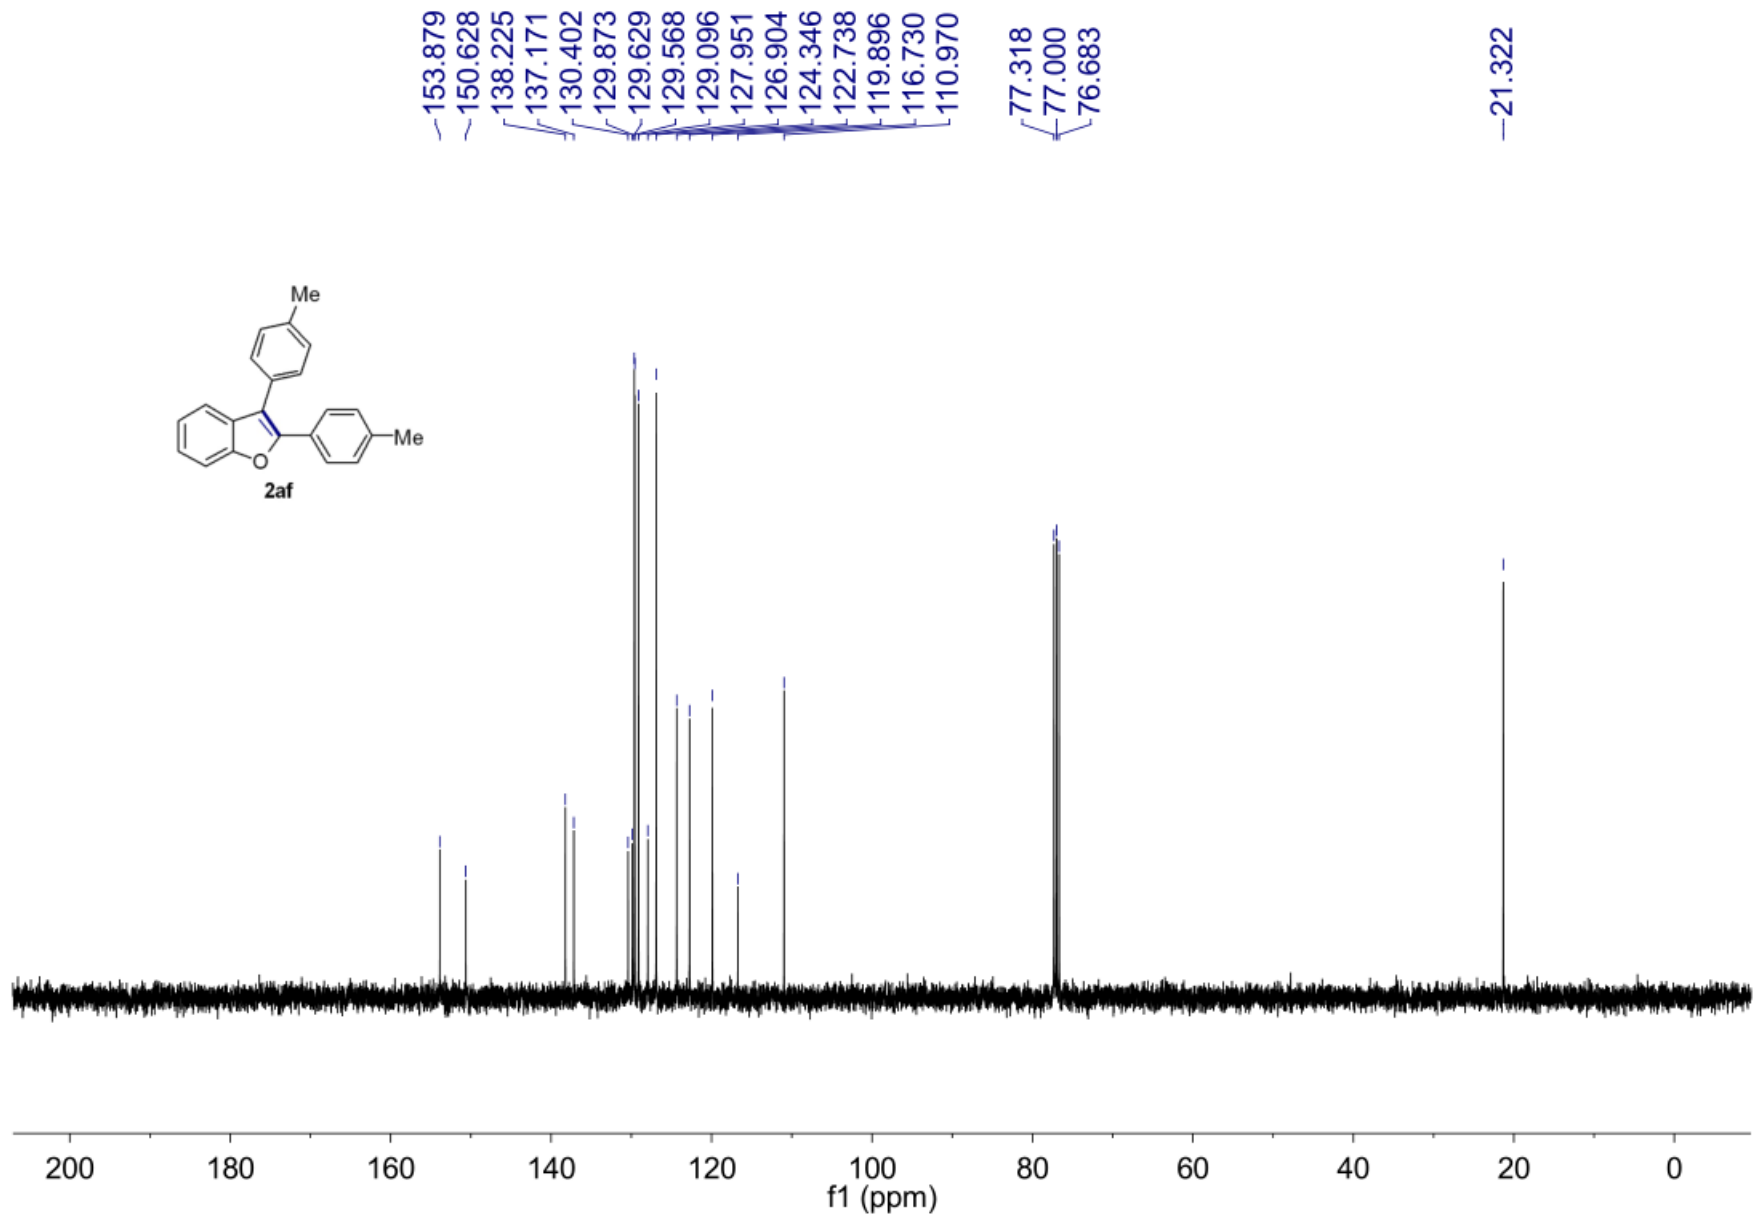

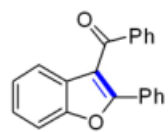

2ag

7.876  
7.857  
7.713  
7.697  
7.626  
7.604  
7.575  
7.531  
7.511  
7.494  
7.396  
7.375  
7.356  
7.332  
7.316  
7.290  
7.280

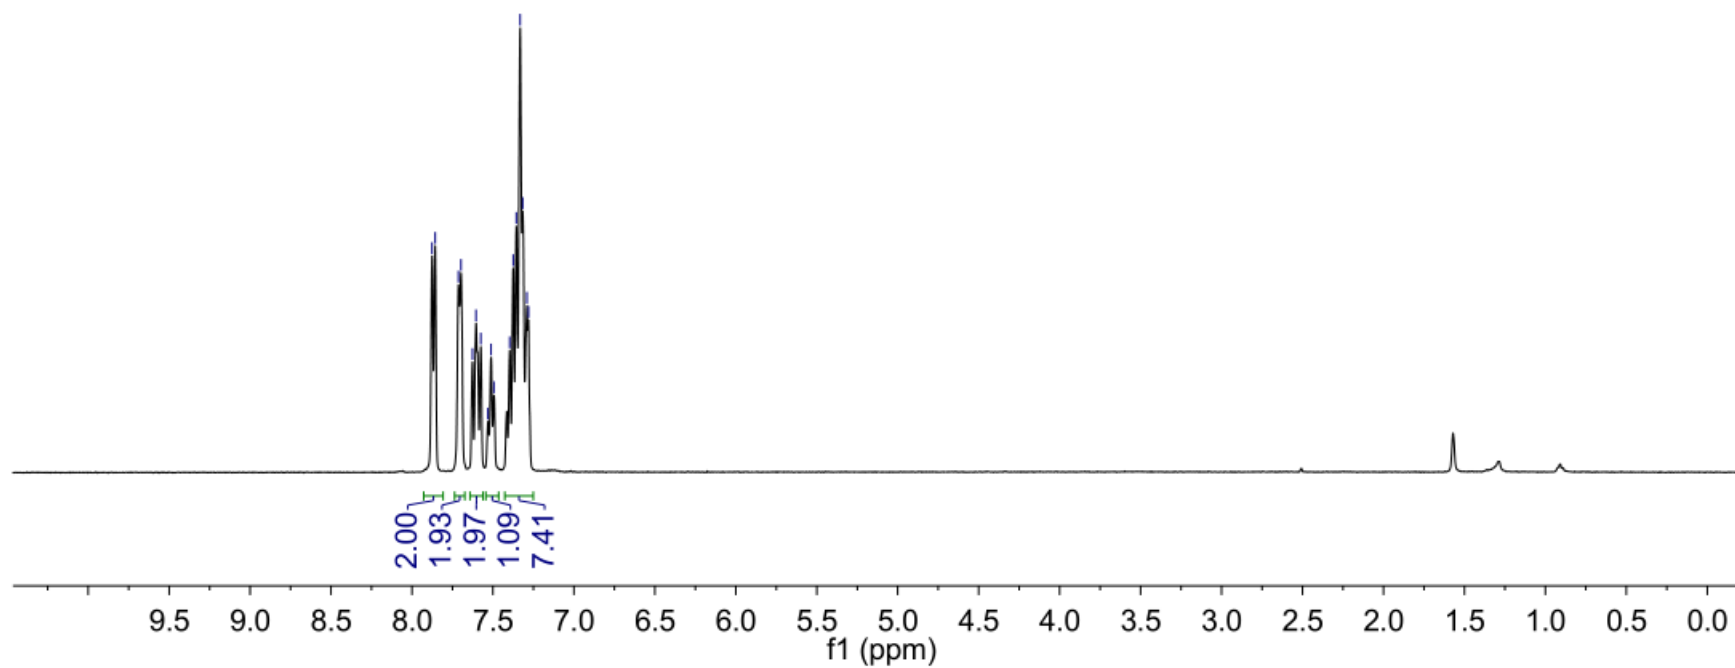

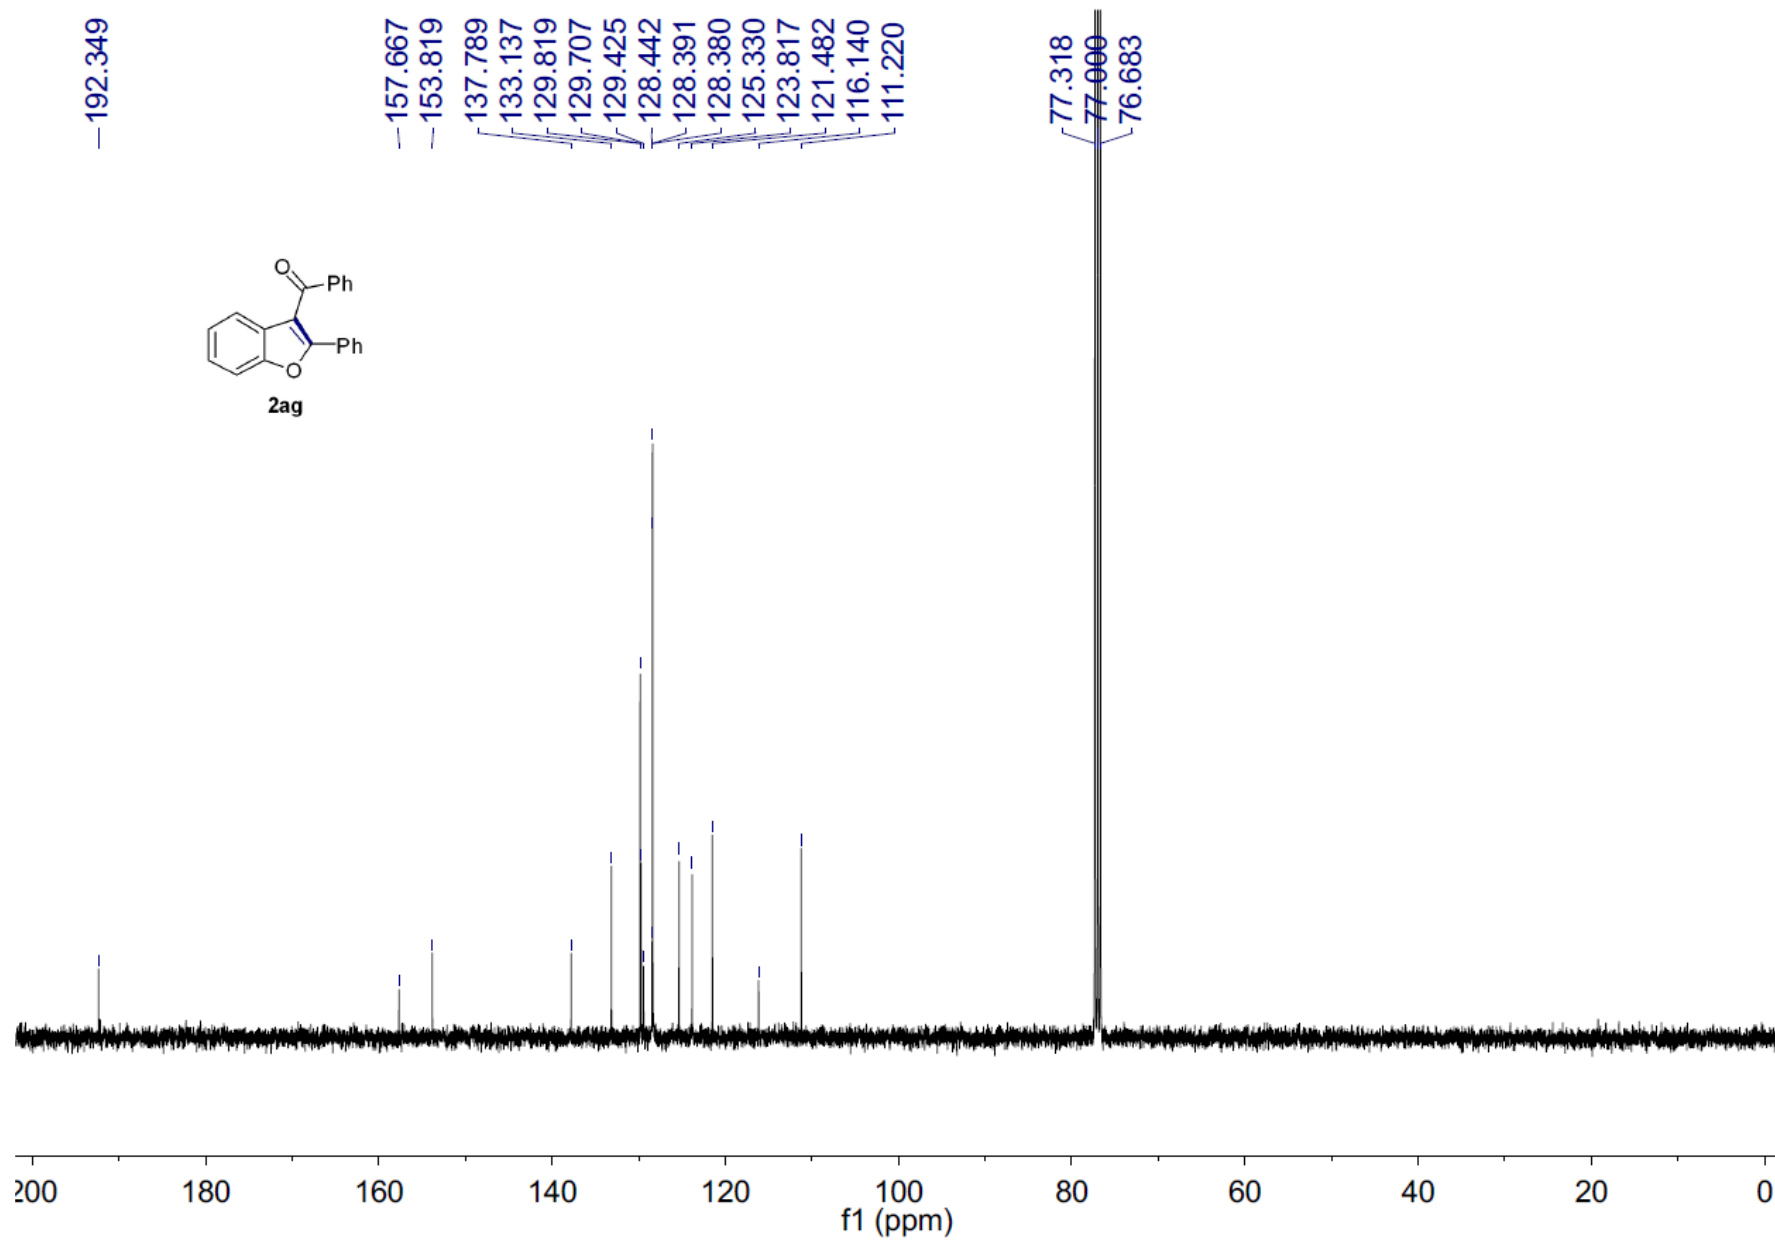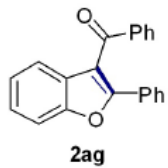

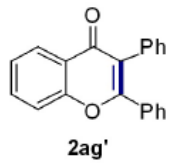

8.336  
8.318  
7.754  
7.736  
7.718  
7.581  
7.560  
7.481  
7.462  
7.441  
7.422  
7.371  
7.353  
7.334  
7.317  
7.301  
7.284  
7.260  
7.241

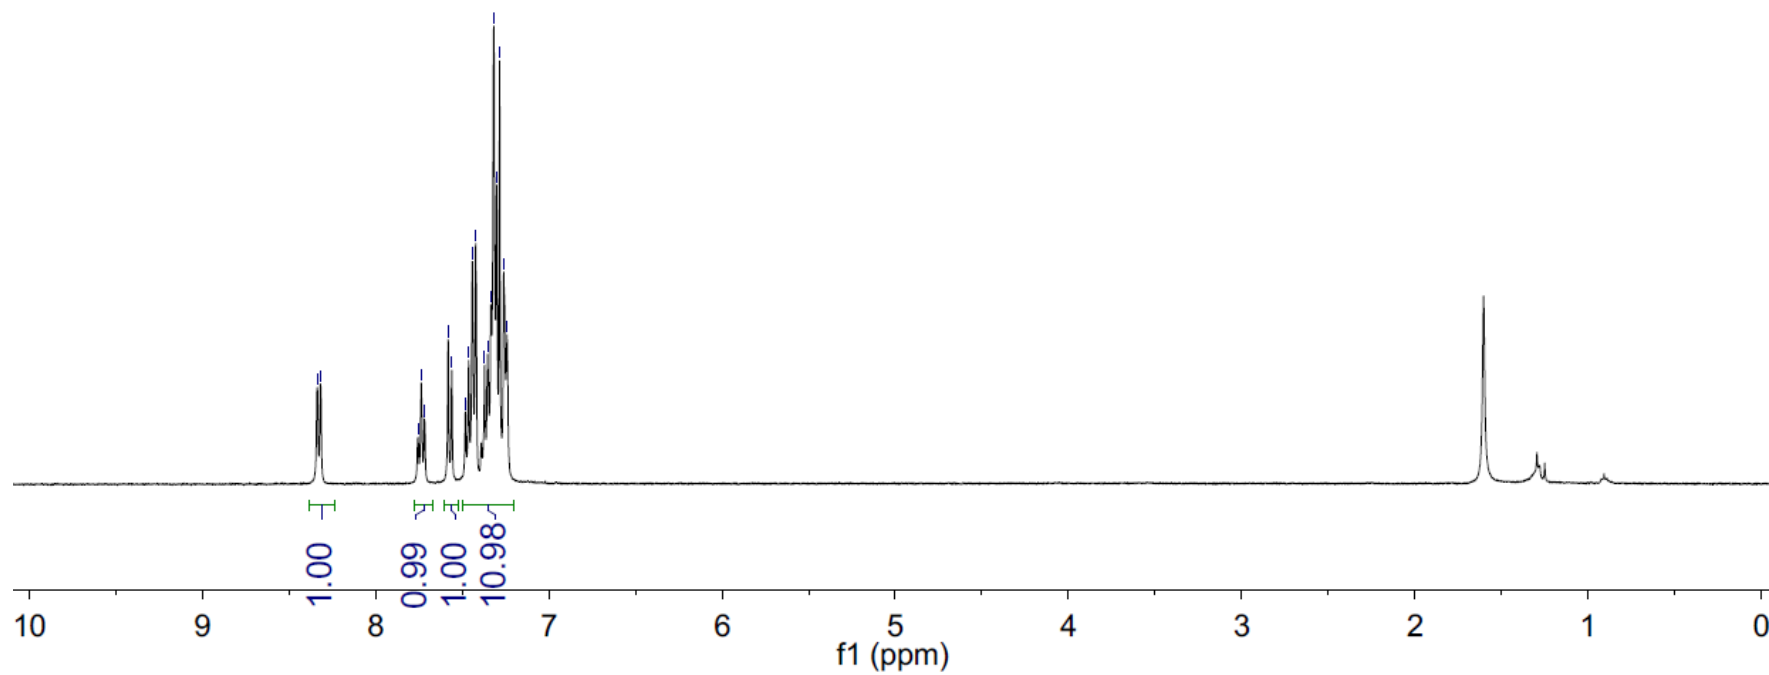



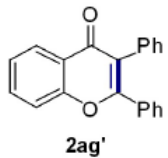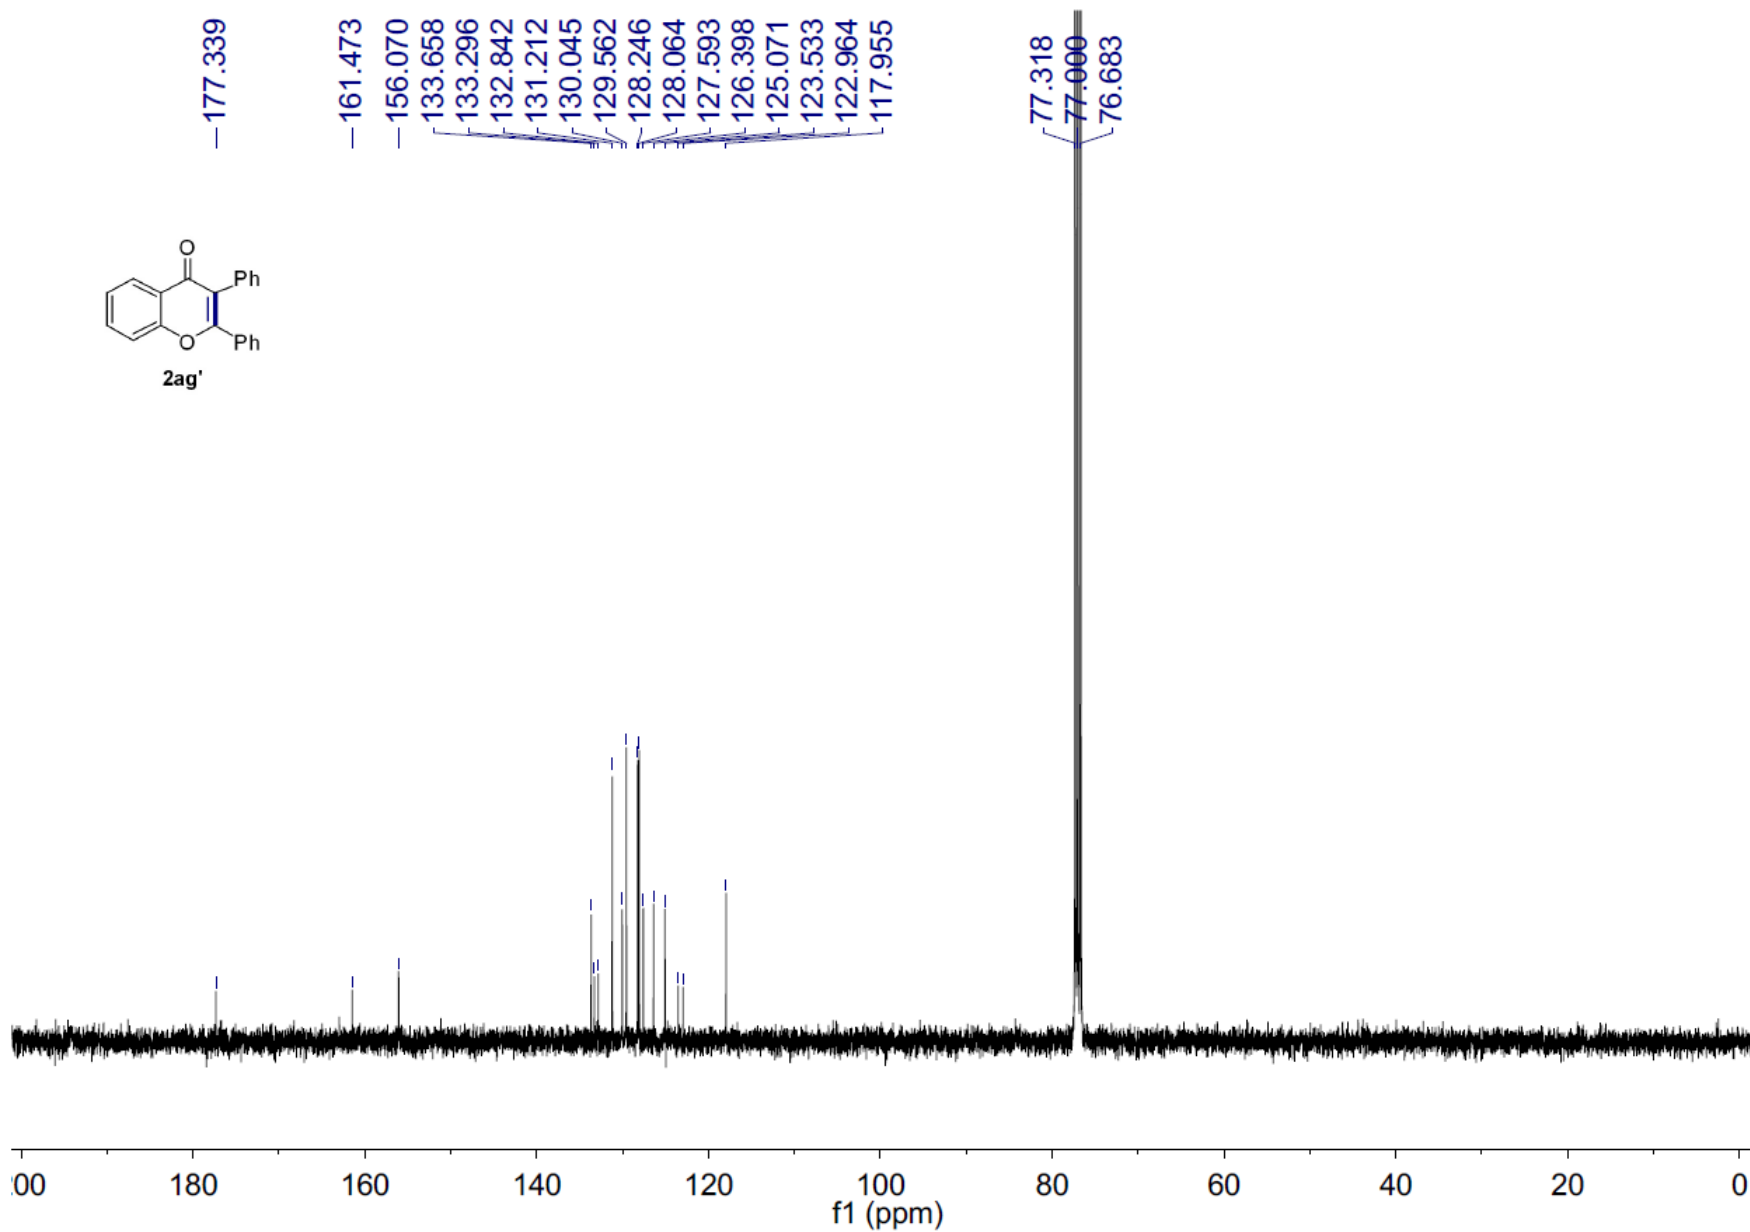

7.805  
7.800  
7.789  
7.784  
7.675  
7.670  
7.658  
7.653  
7.596  
7.575  
7.475  
7.473  
7.456  
7.455  
7.453  
7.452  
7.388  
7.385  
7.367  
7.364  
7.359  
7.347  
7.342  
7.329  
7.324  
7.312  
7.307  
7.289  
7.287  
7.269  
7.260

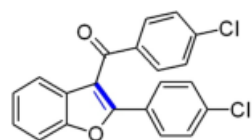

2ah

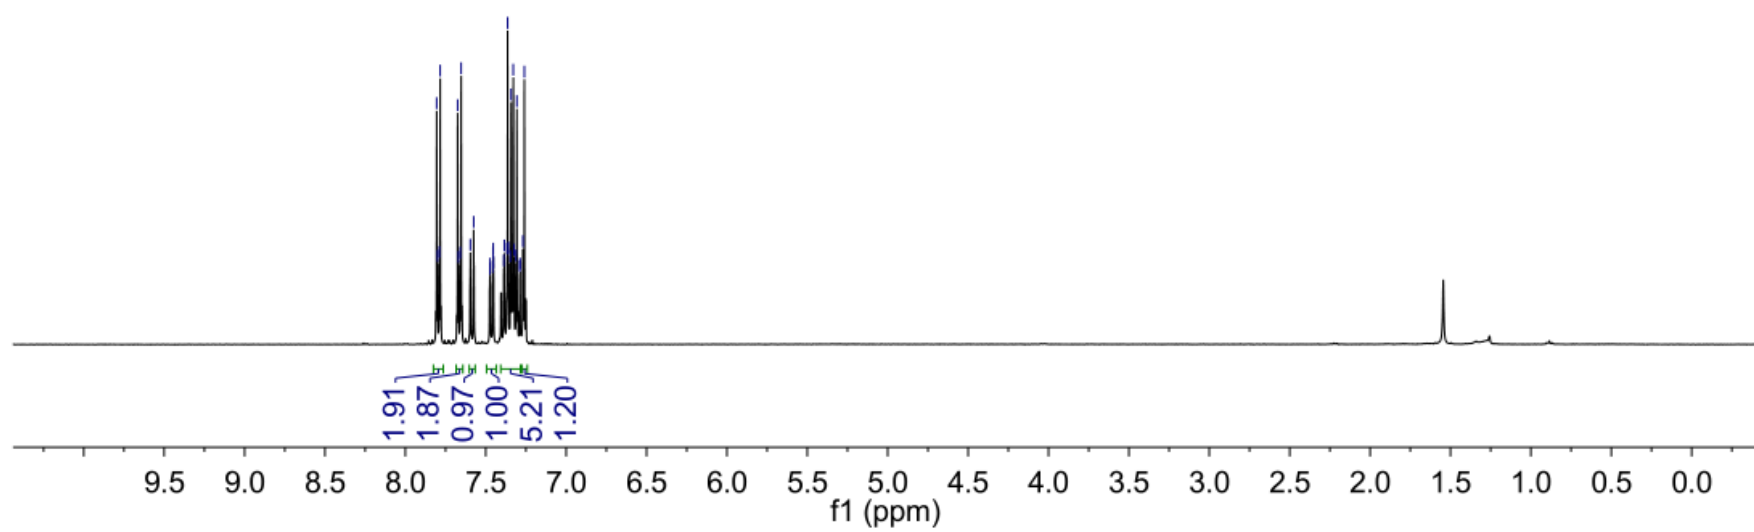

—190.729

156.308  
153.756  
139.942  
136.096  
135.984  
131.189  
129.495  
128.921  
128.845  
128.081  
127.741  
125.722  
124.045  
121.398  
116.160  
111.348

77.318  
77.000  
76.683

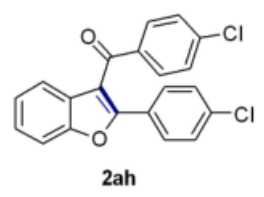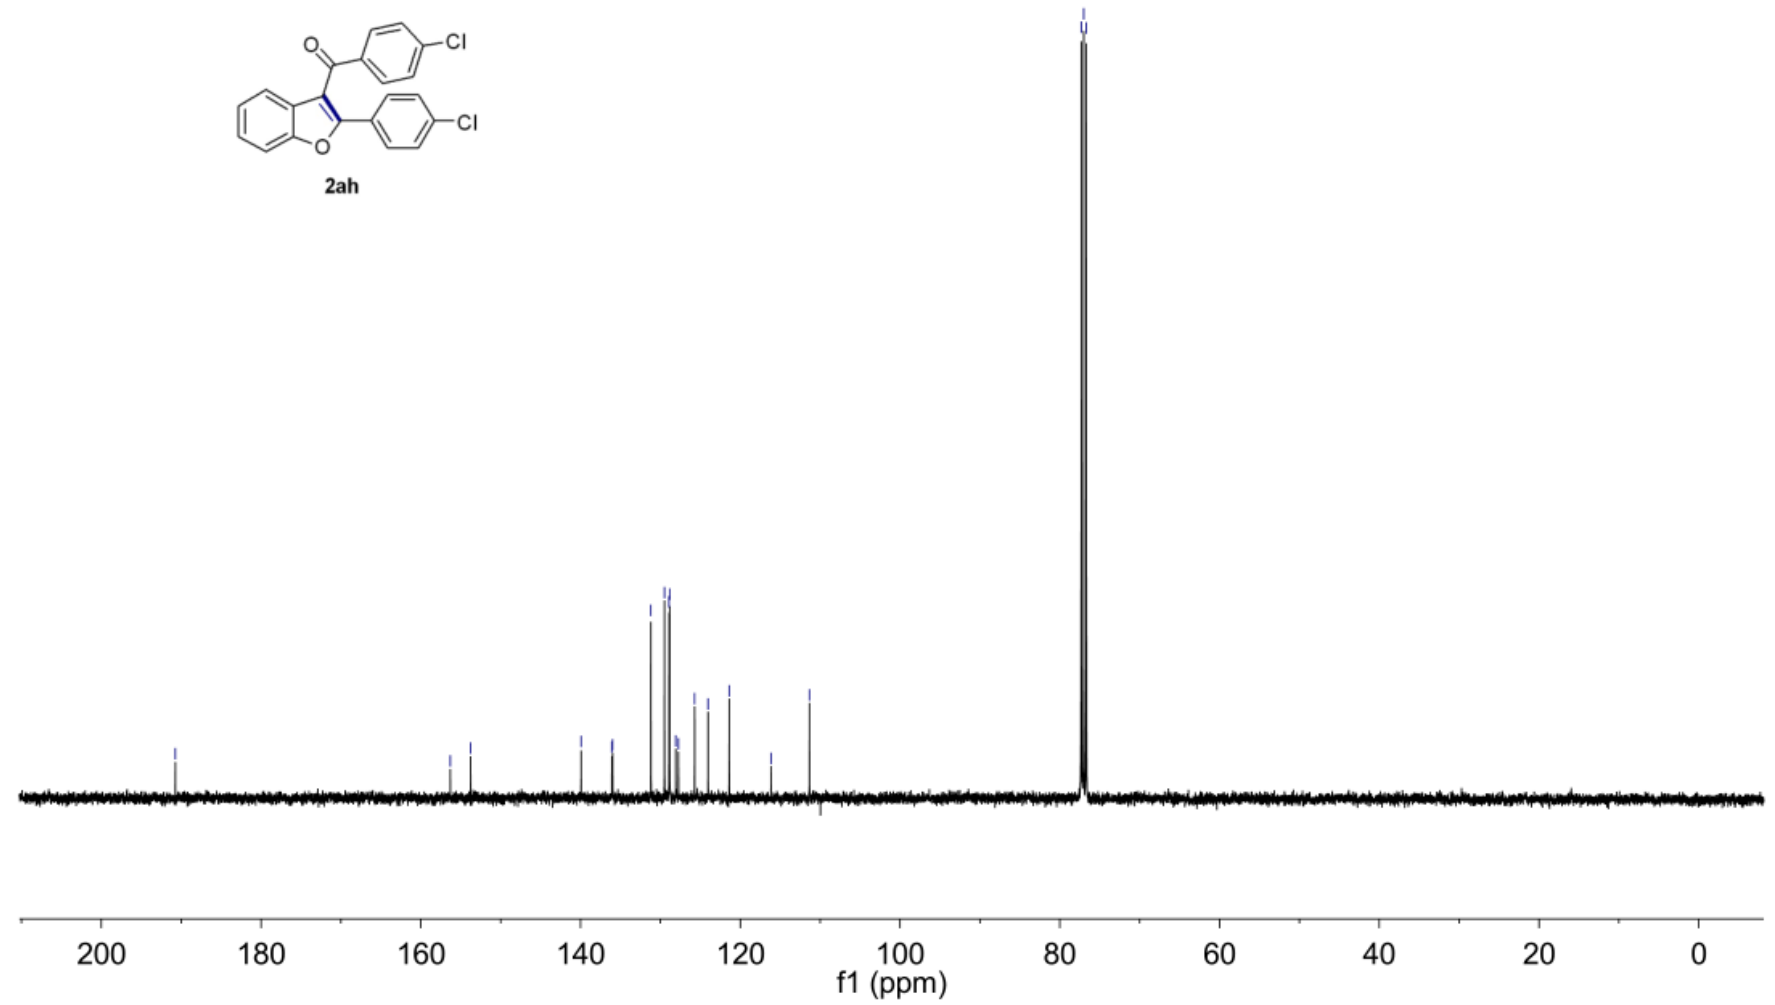

7.734  
7.728  
7.724  
7.712  
7.707  
7.701  
7.615  
7.609  
7.604  
7.595  
7.592  
7.587  
7.581  
7.574  
7.542  
7.536  
7.532  
7.519  
7.515  
7.509  
7.496  
7.490  
7.485  
7.474  
7.469  
7.463  
7.442  
7.389  
7.387  
7.369  
7.366  
7.285  
7.267  
7.260  
7.249  
7.247

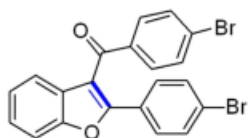

2ai

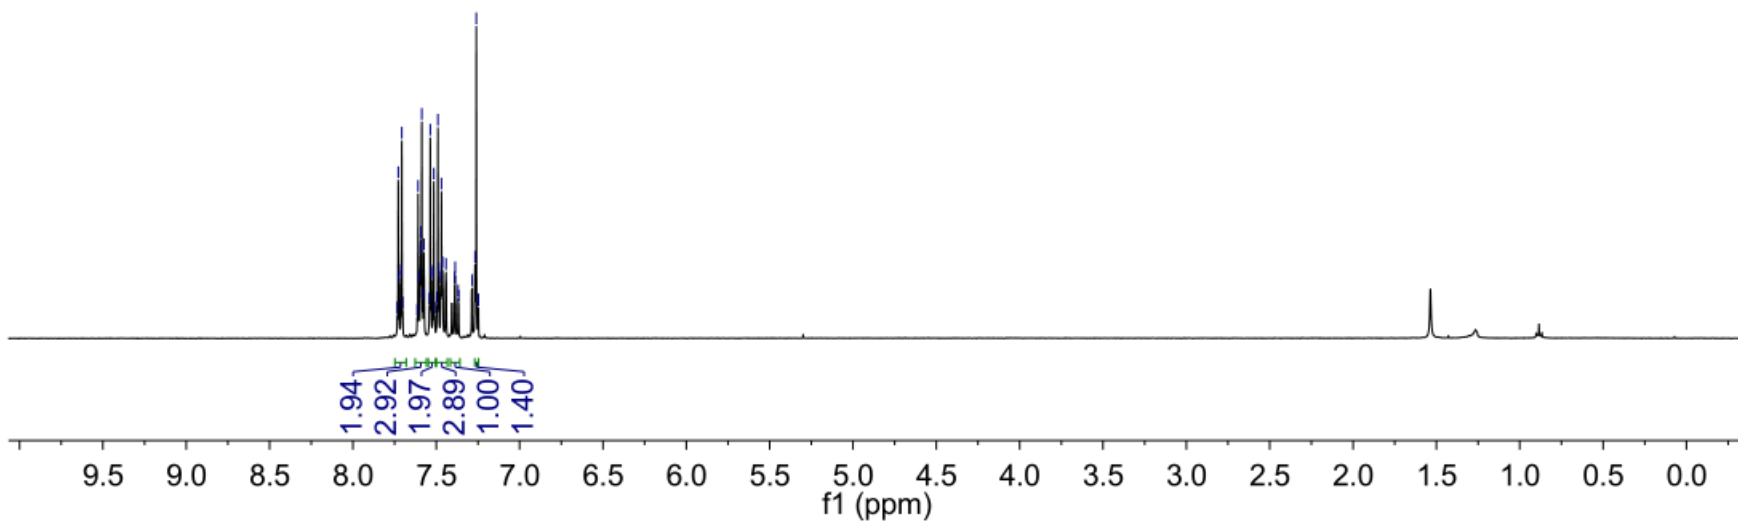

—190.897

156.330  
153.749  
136.371  
131.921  
131.806  
131.267  
129.650  
128.726  
128.158  
128.055  
125.754  
124.490  
124.060  
121.393  
116.187  
111.364

77.317  
77.000  
76.682

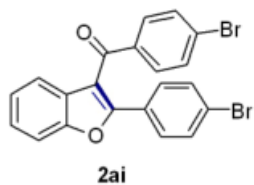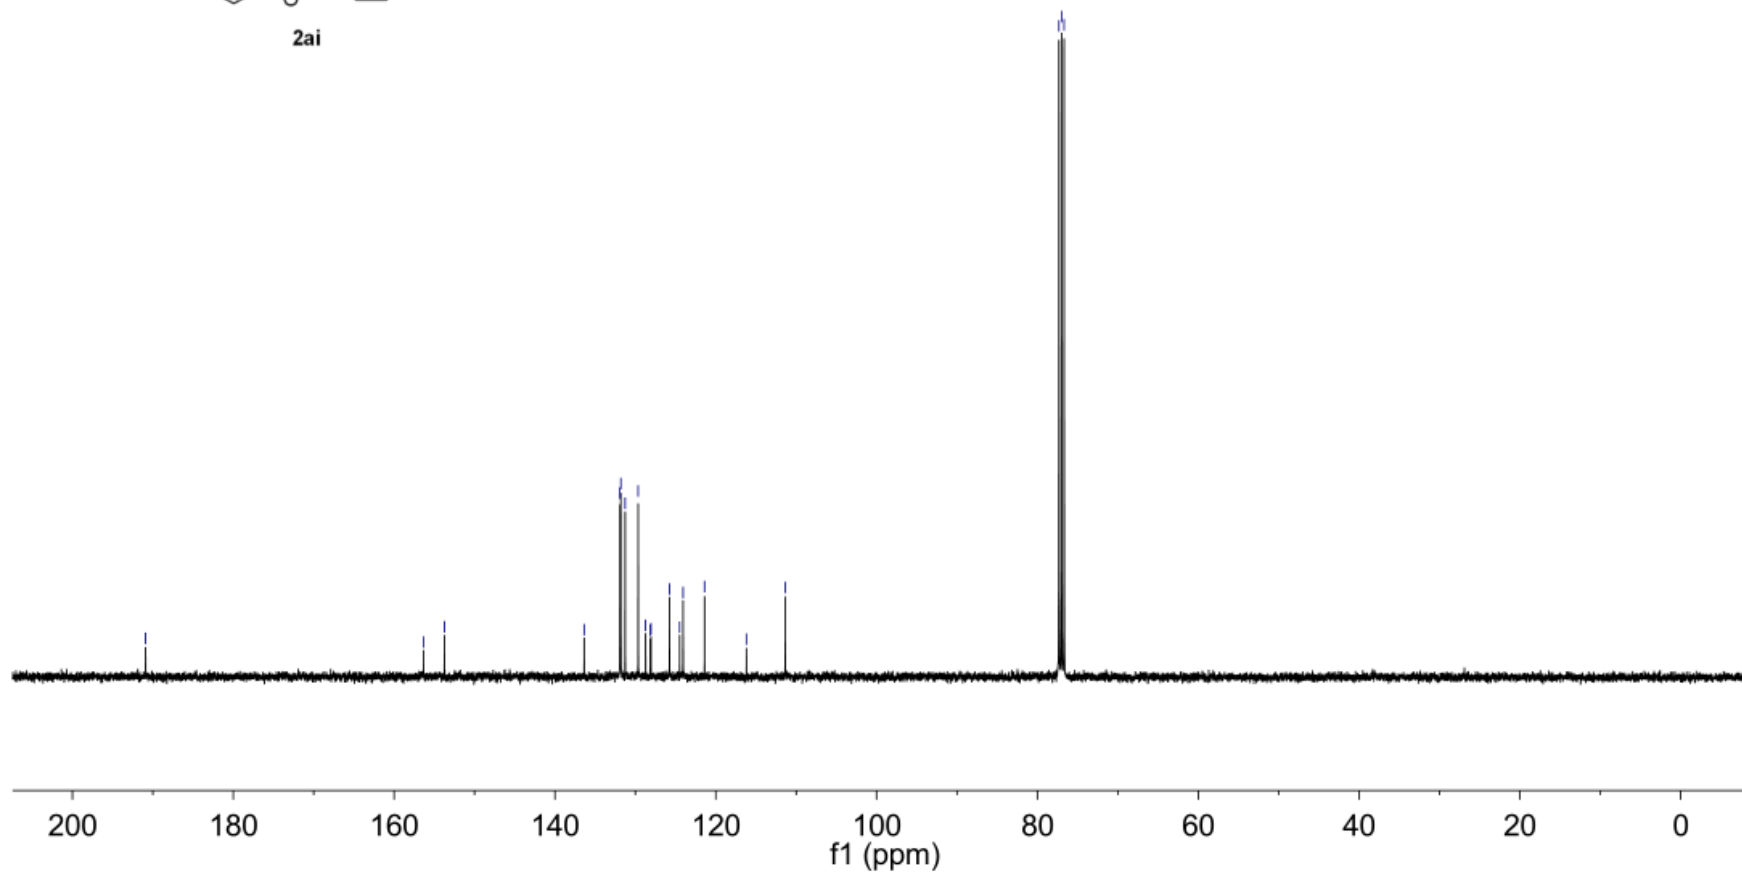

7.923  
7.918  
7.901  
7.640  
7.623  
7.618  
7.437  
7.433  
7.419  
7.408  
7.404  
7.397  
7.392  
7.380  
7.373  
7.367  
7.363  
7.353  
7.348  
7.294  
7.285  
7.274  
7.268

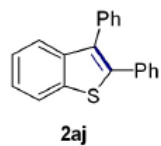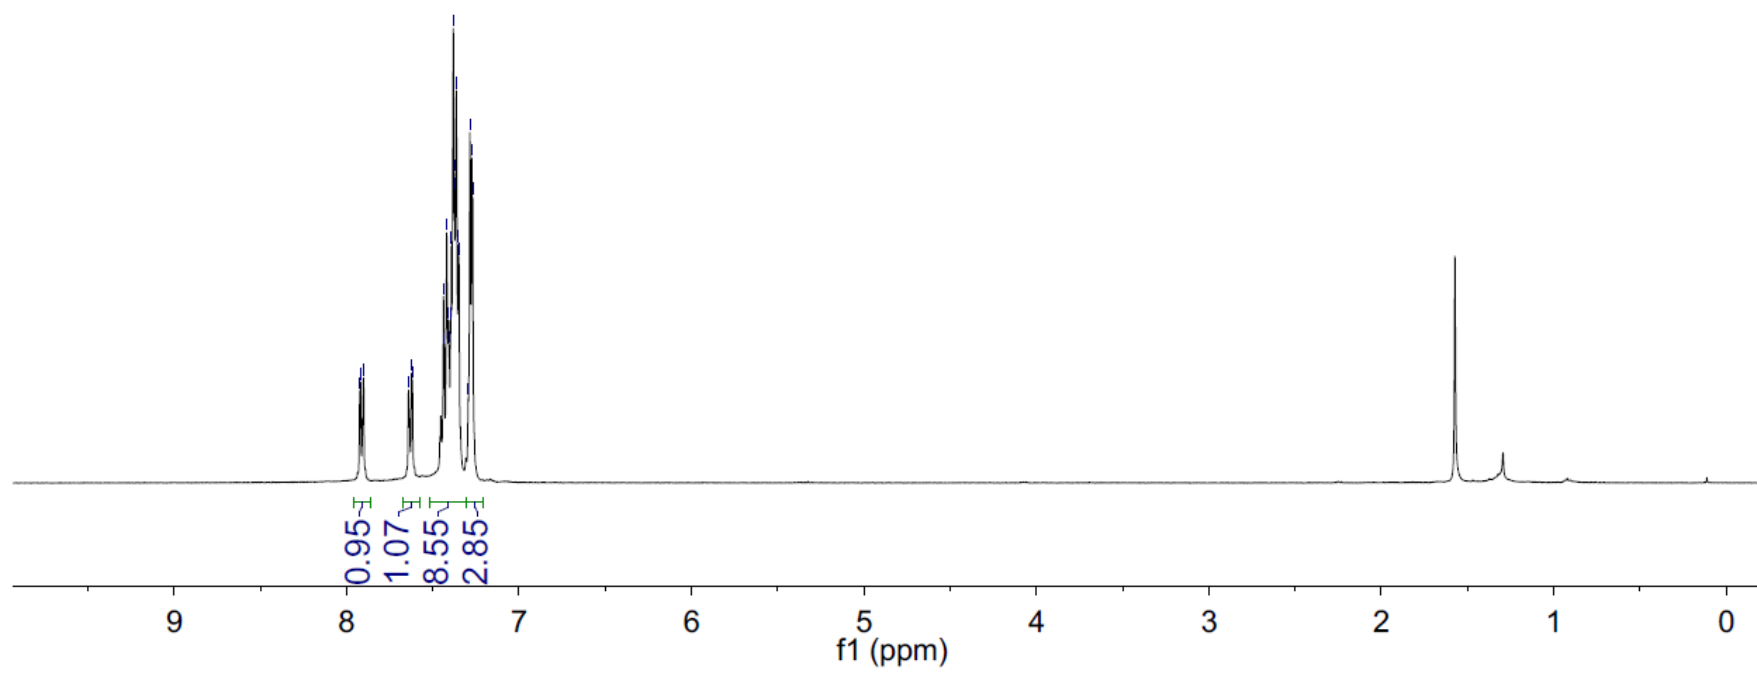

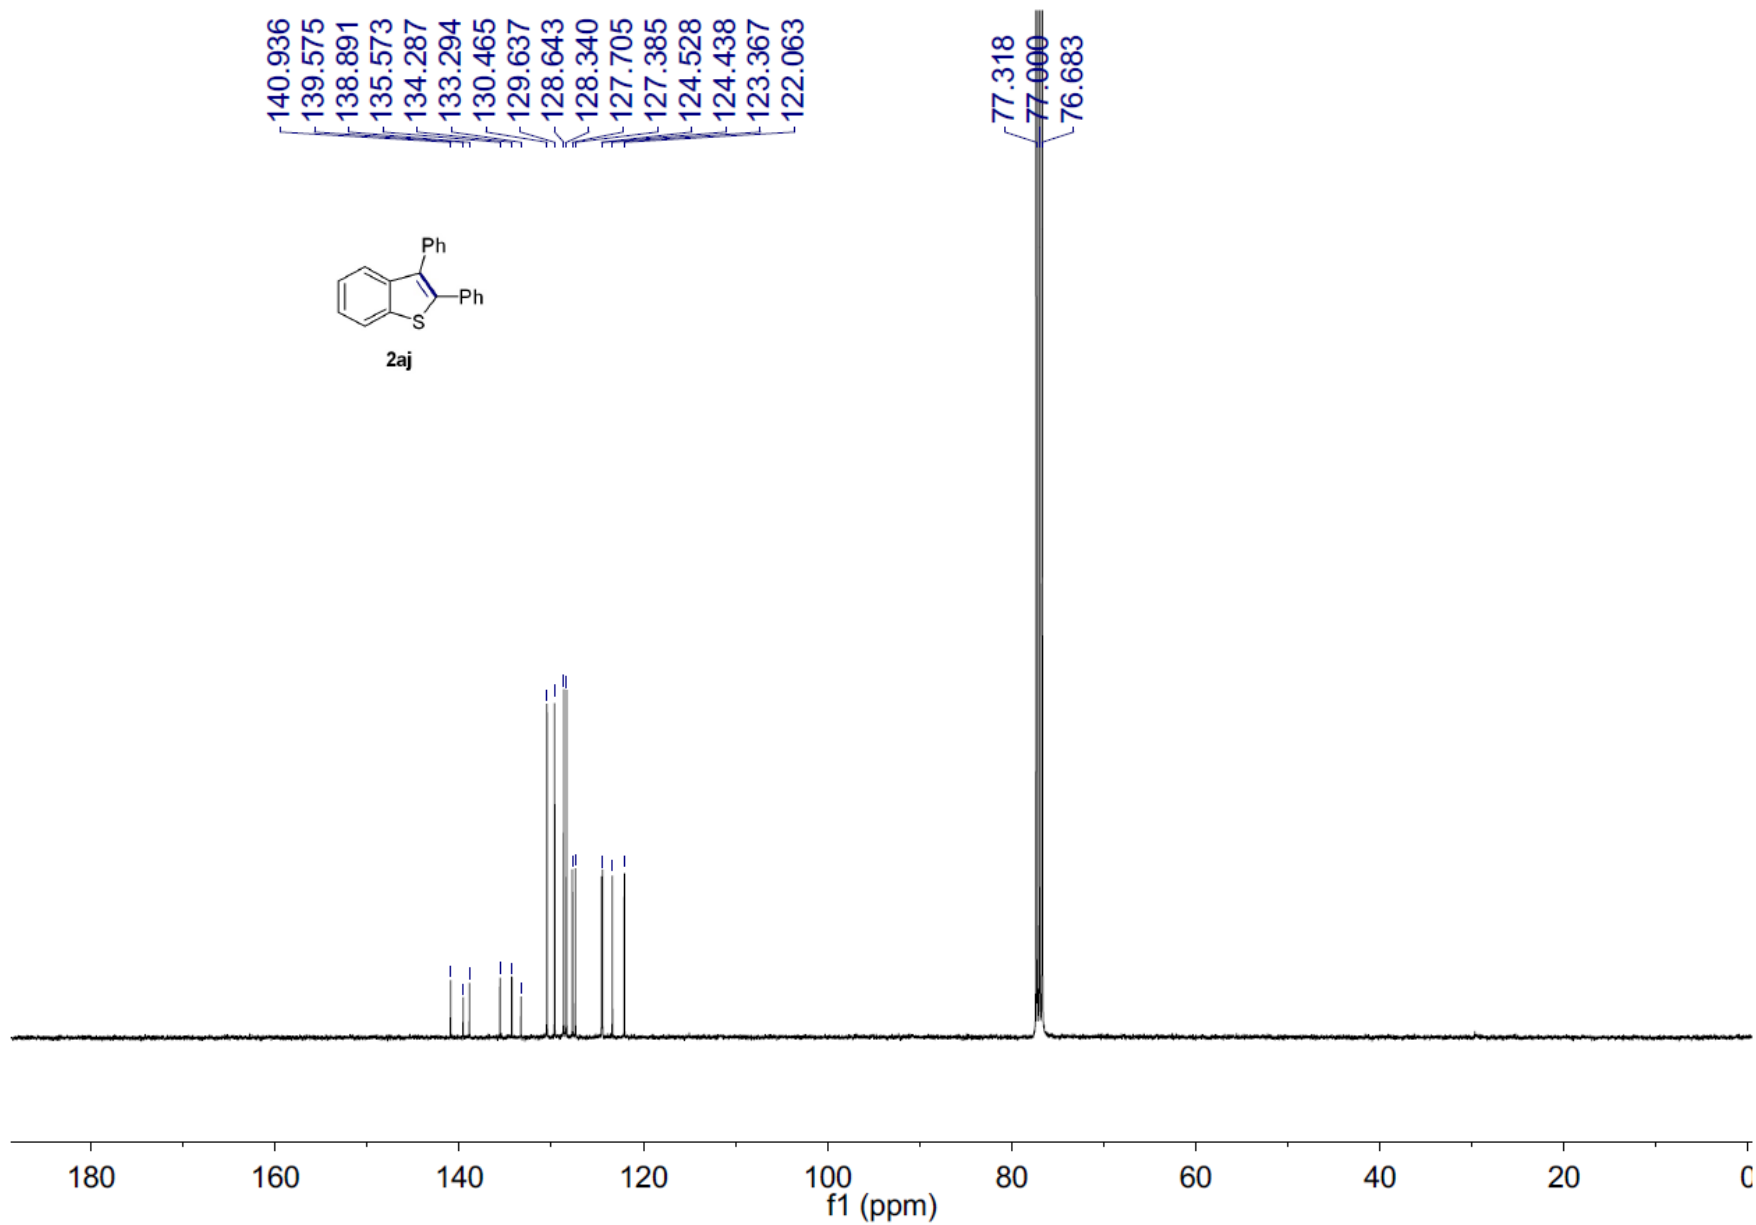

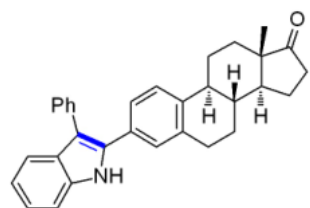

2ak

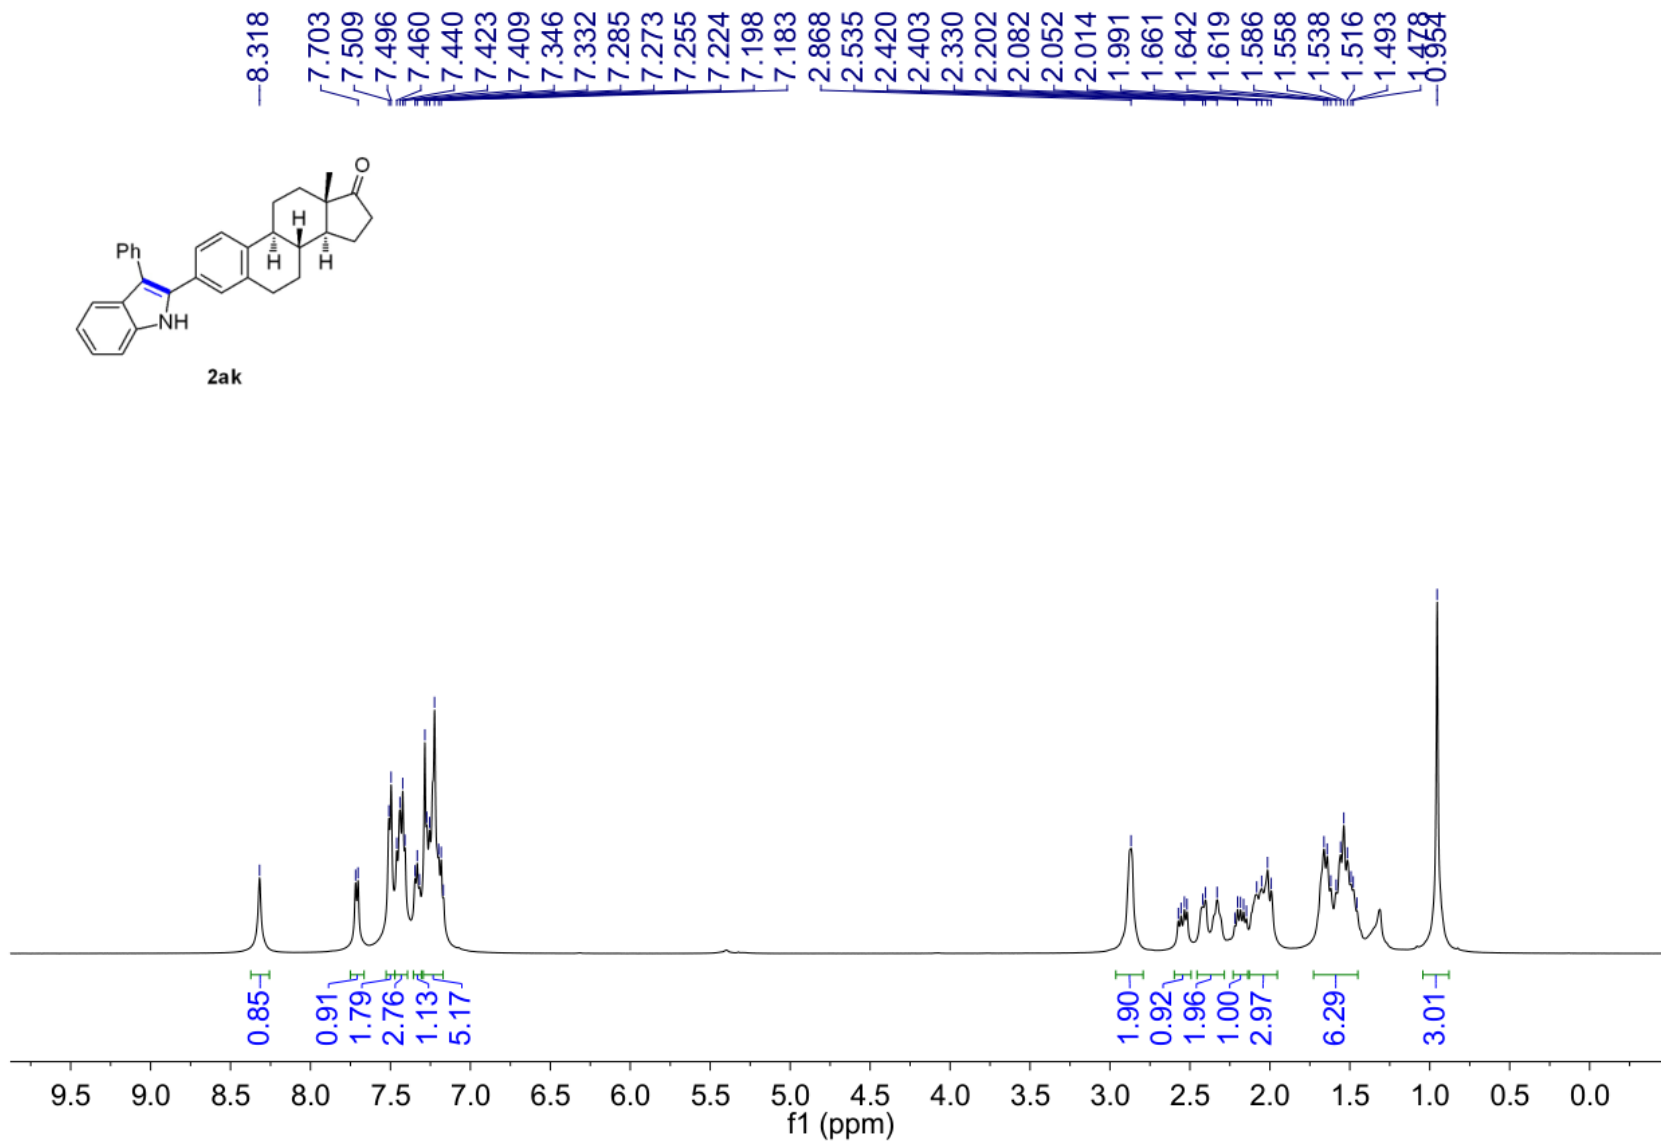



220.741

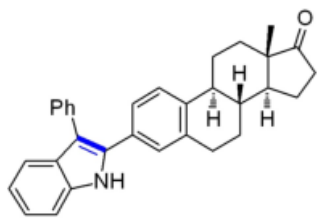

2ak

139.320  
136.765  
135.793  
135.216  
133.970  
130.151  
130.099  
128.848  
128.411  
128.244  
126.132  
125.592  
125.567  
122.488  
120.292  
119.536  
114.707  
110.781  
77.254  
77.000  
76.746

50.470  
47.919  
44.352  
37.986  
35.798  
31.541  
29.322  
26.383  
25.556  
21.537  
13.814

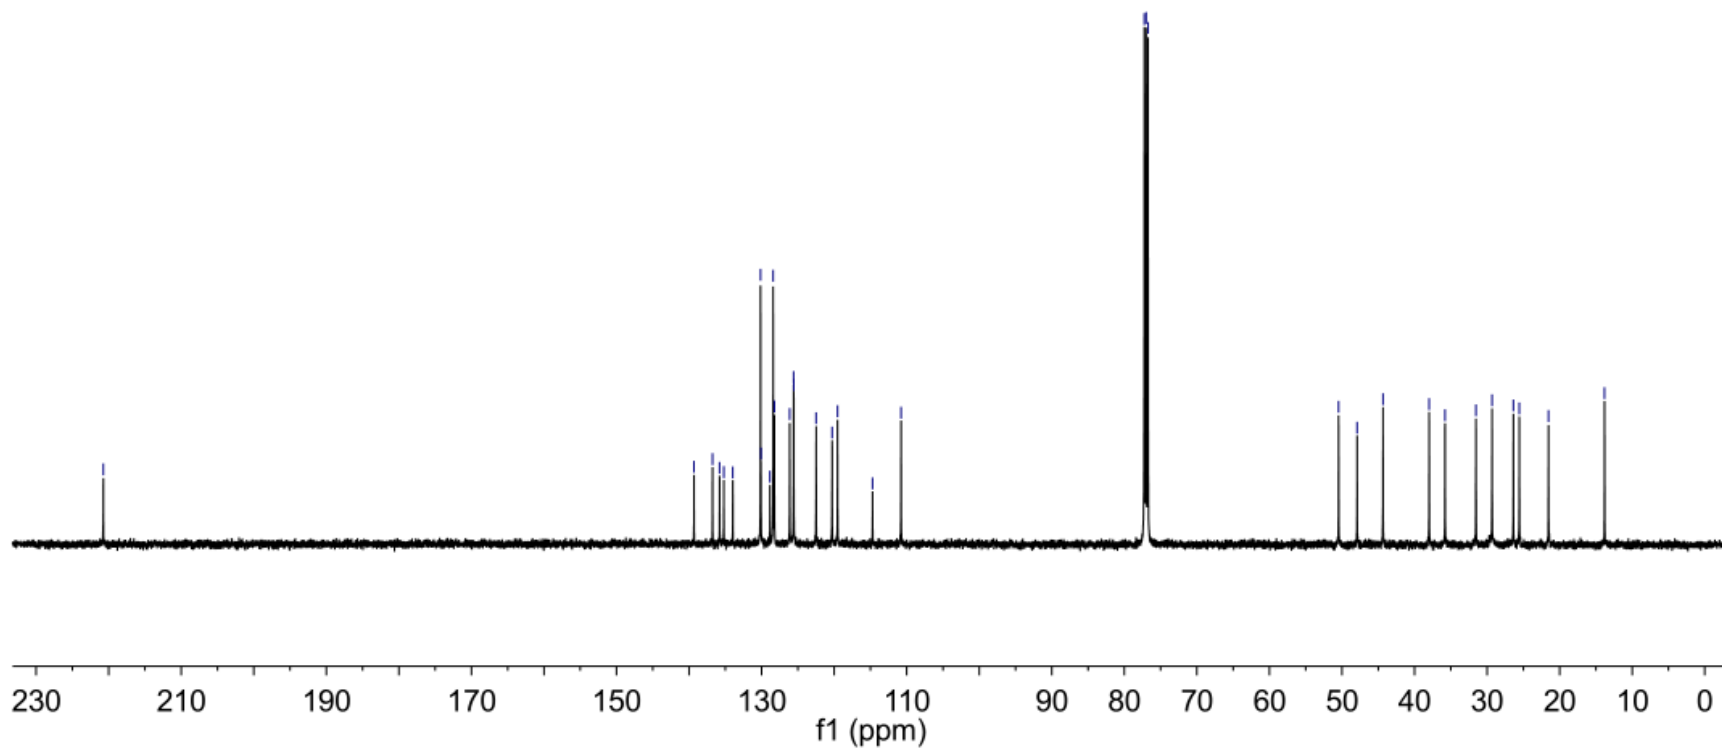

8.348  
7.950  
7.827  
7.806  
7.780  
7.759  
7.752  
7.747  
7.606  
7.601  
7.544  
7.539  
7.517  
7.515  
7.496  
7.475  
7.457  
7.418  
7.400  
7.381  
7.341  
7.322  
7.307  
7.289  
7.260  
7.218  
7.199  
7.010  
6.989  
3.911

~2.207  
~2.127  
~1.827

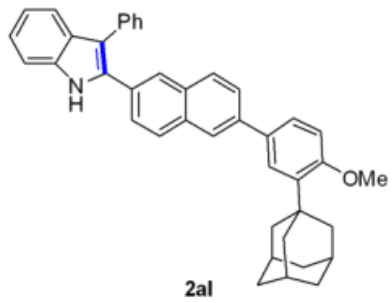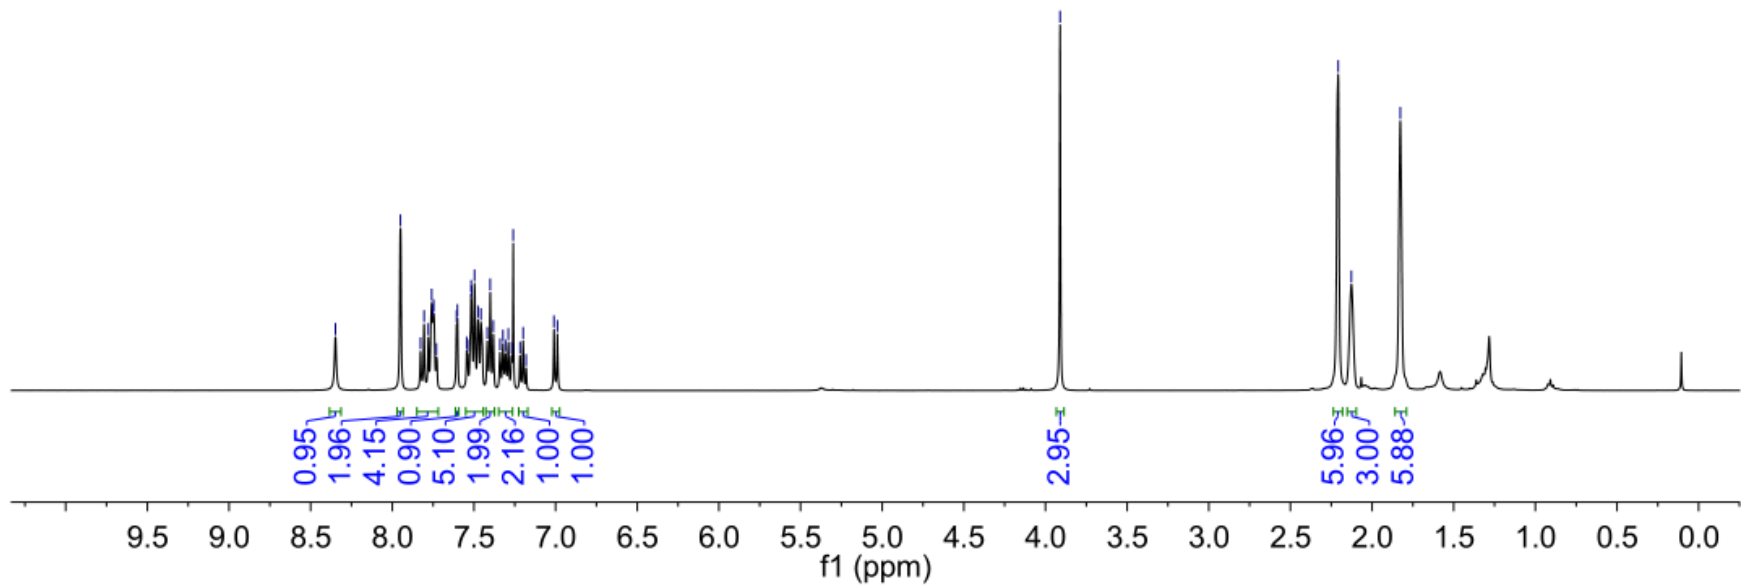

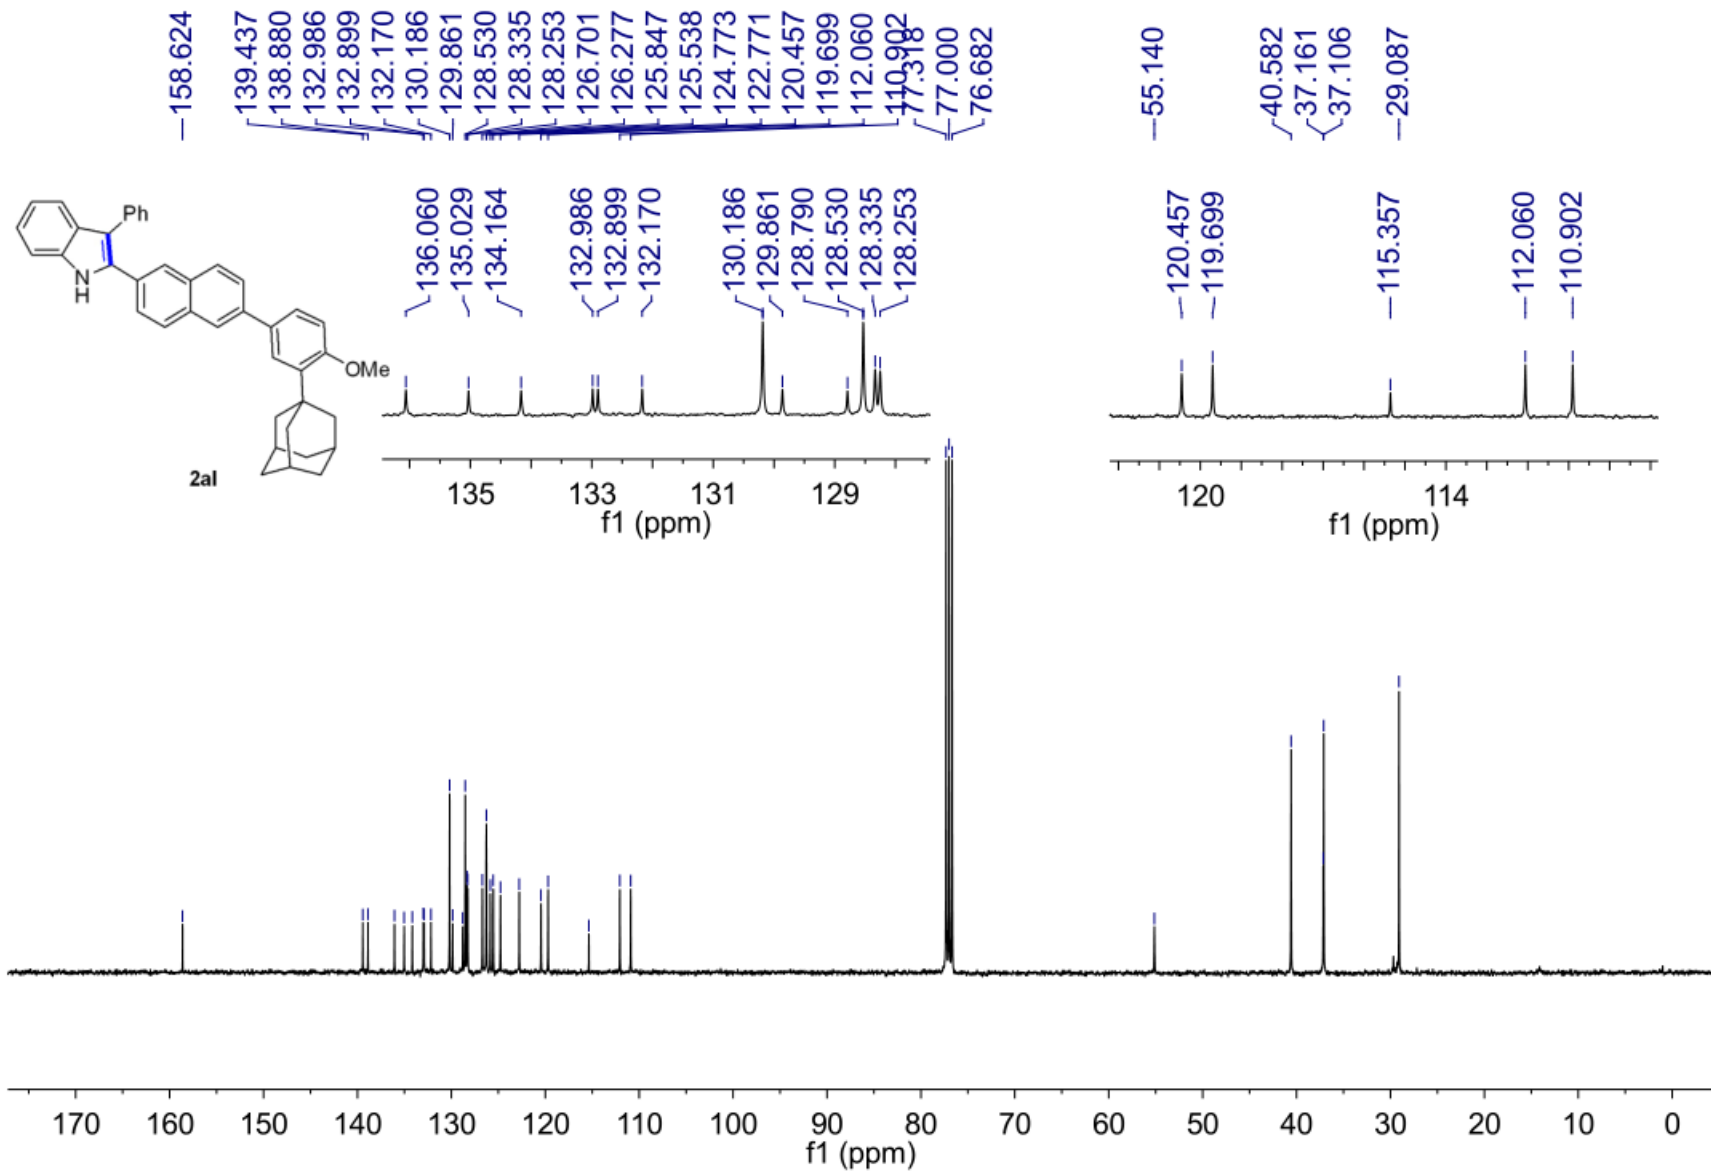

8.418  
8.171  
7.962  
7.942  
7.690  
7.670  
7.560  
7.541  
7.472  
7.451  
7.433  
7.411  
7.393  
7.374  
7.367  
7.348  
7.328  
7.313  
7.292  
7.272  
7.260  
7.254  
7.188  
7.169  
7.151  
4.952  
4.936  
4.925  
4.909  
2.102  
2.072  
1.887  
1.880  
1.870  
1.863  
1.746  
1.718  
1.532  
1.524  
1.494  
1.134  
1.107  
1.076  
1.048  
0.945  
0.928  
0.923  
0.905  
0.792  
0.775

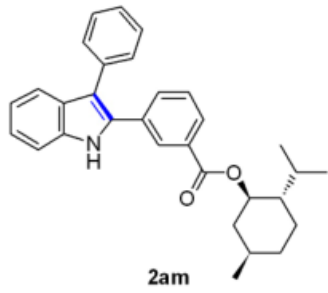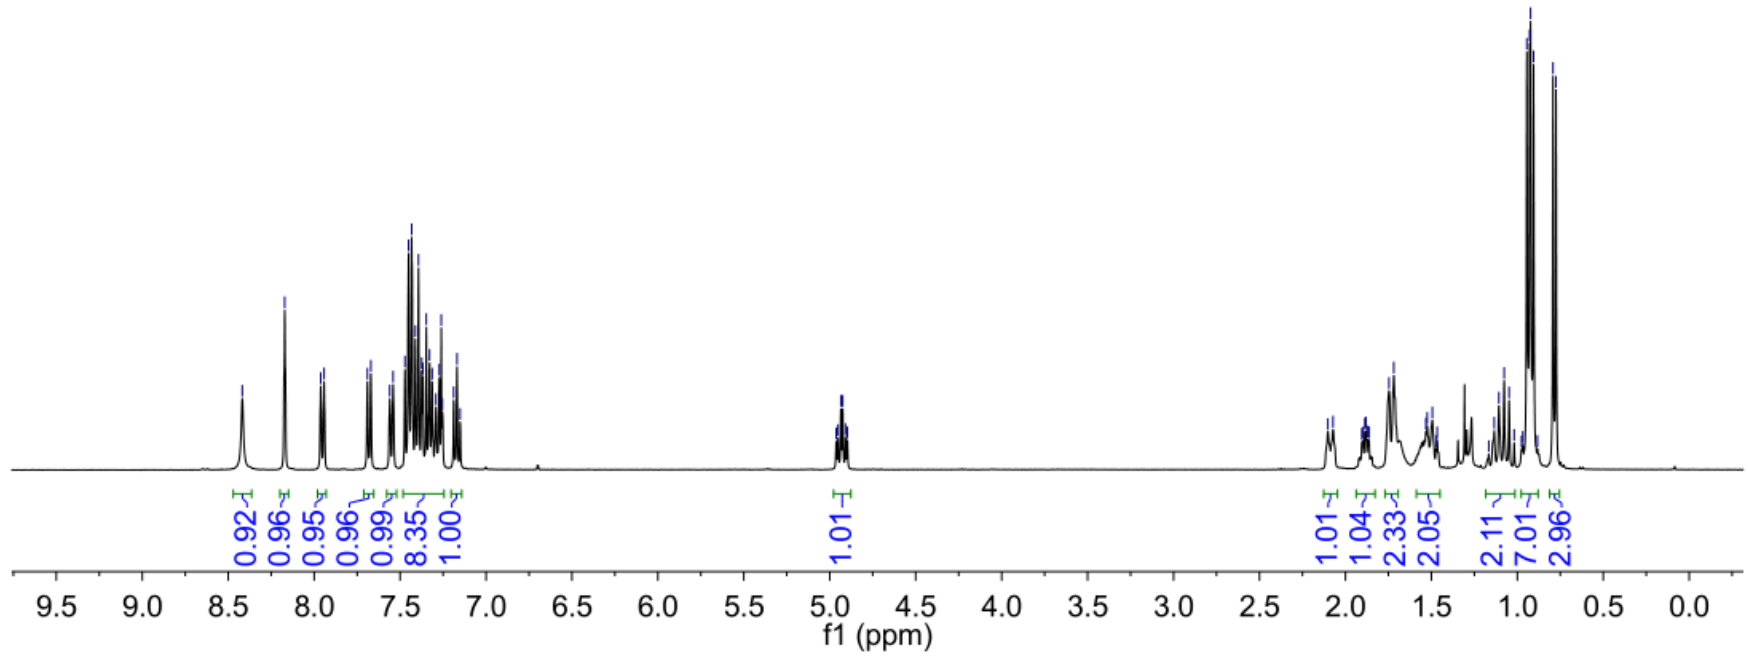

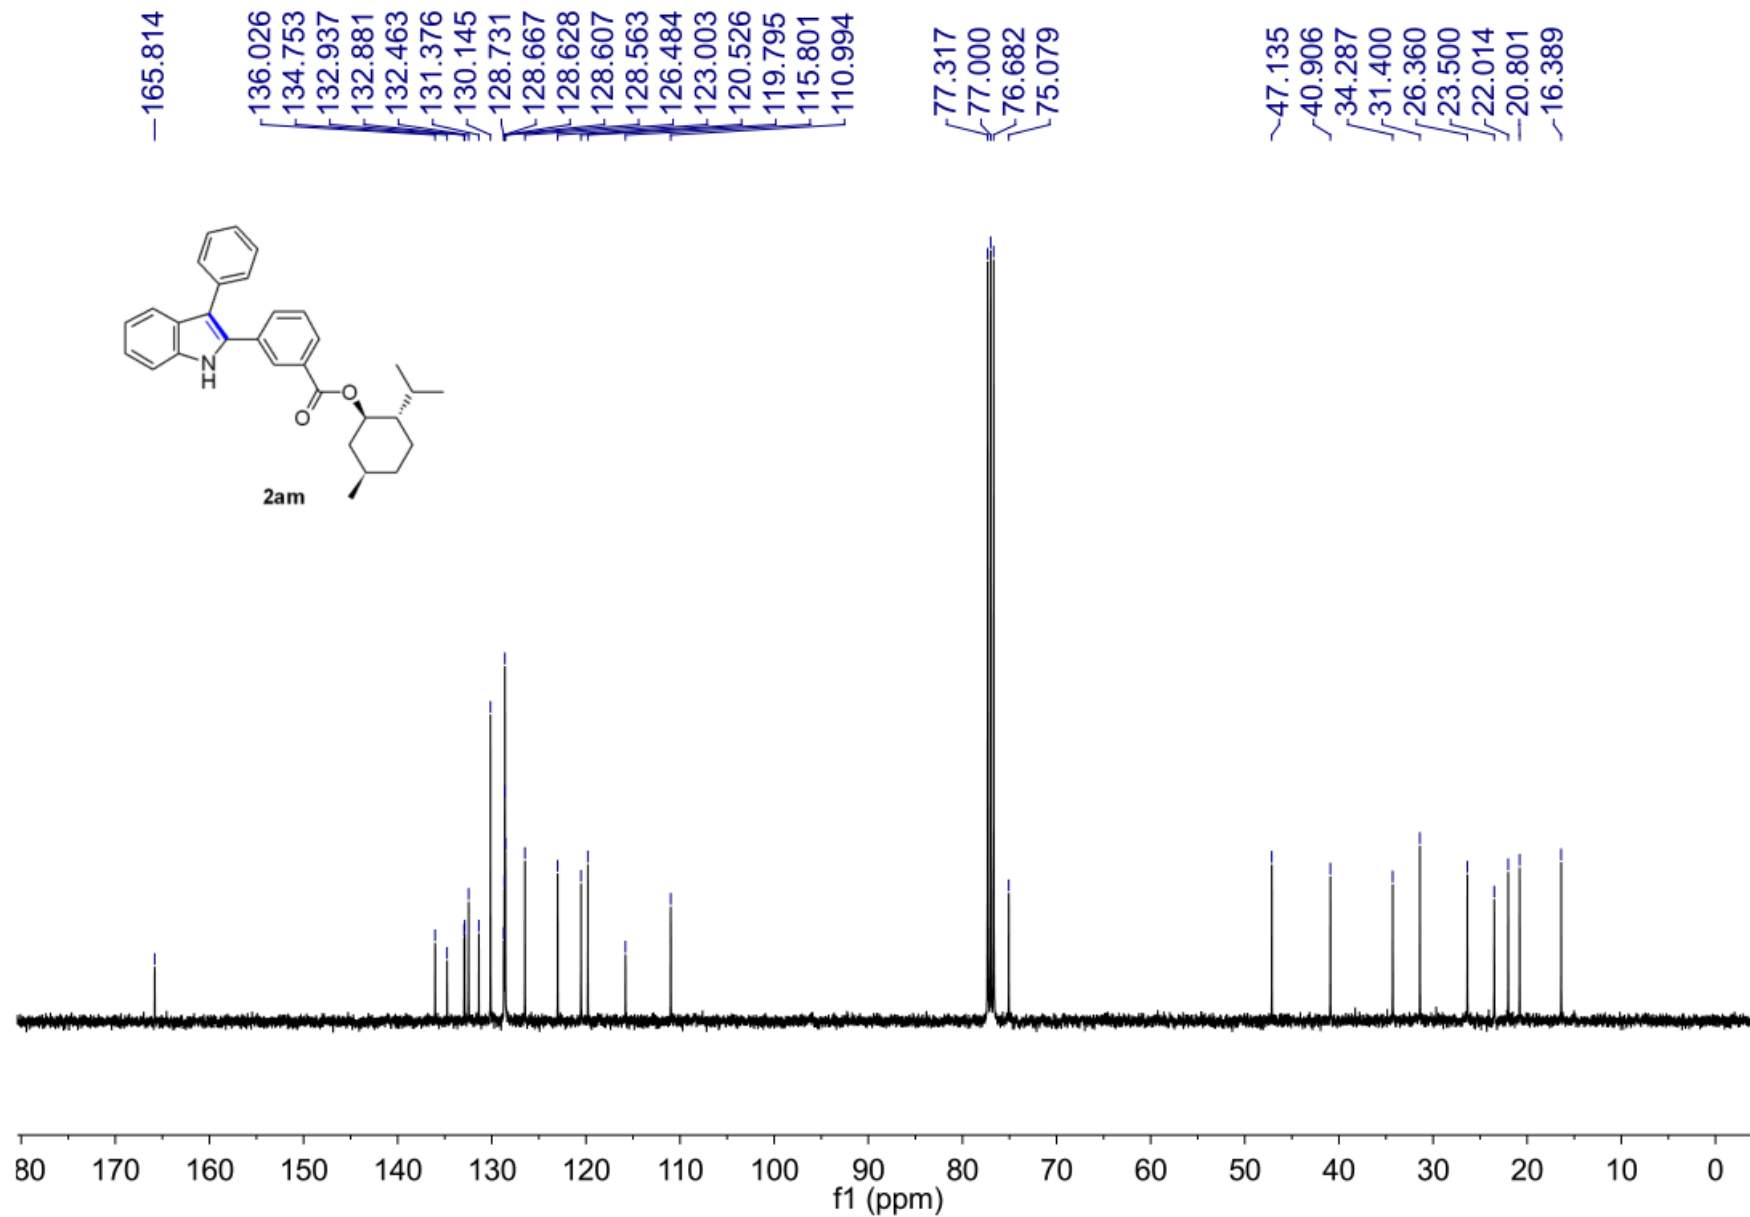

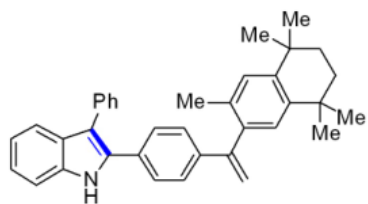

**2an**

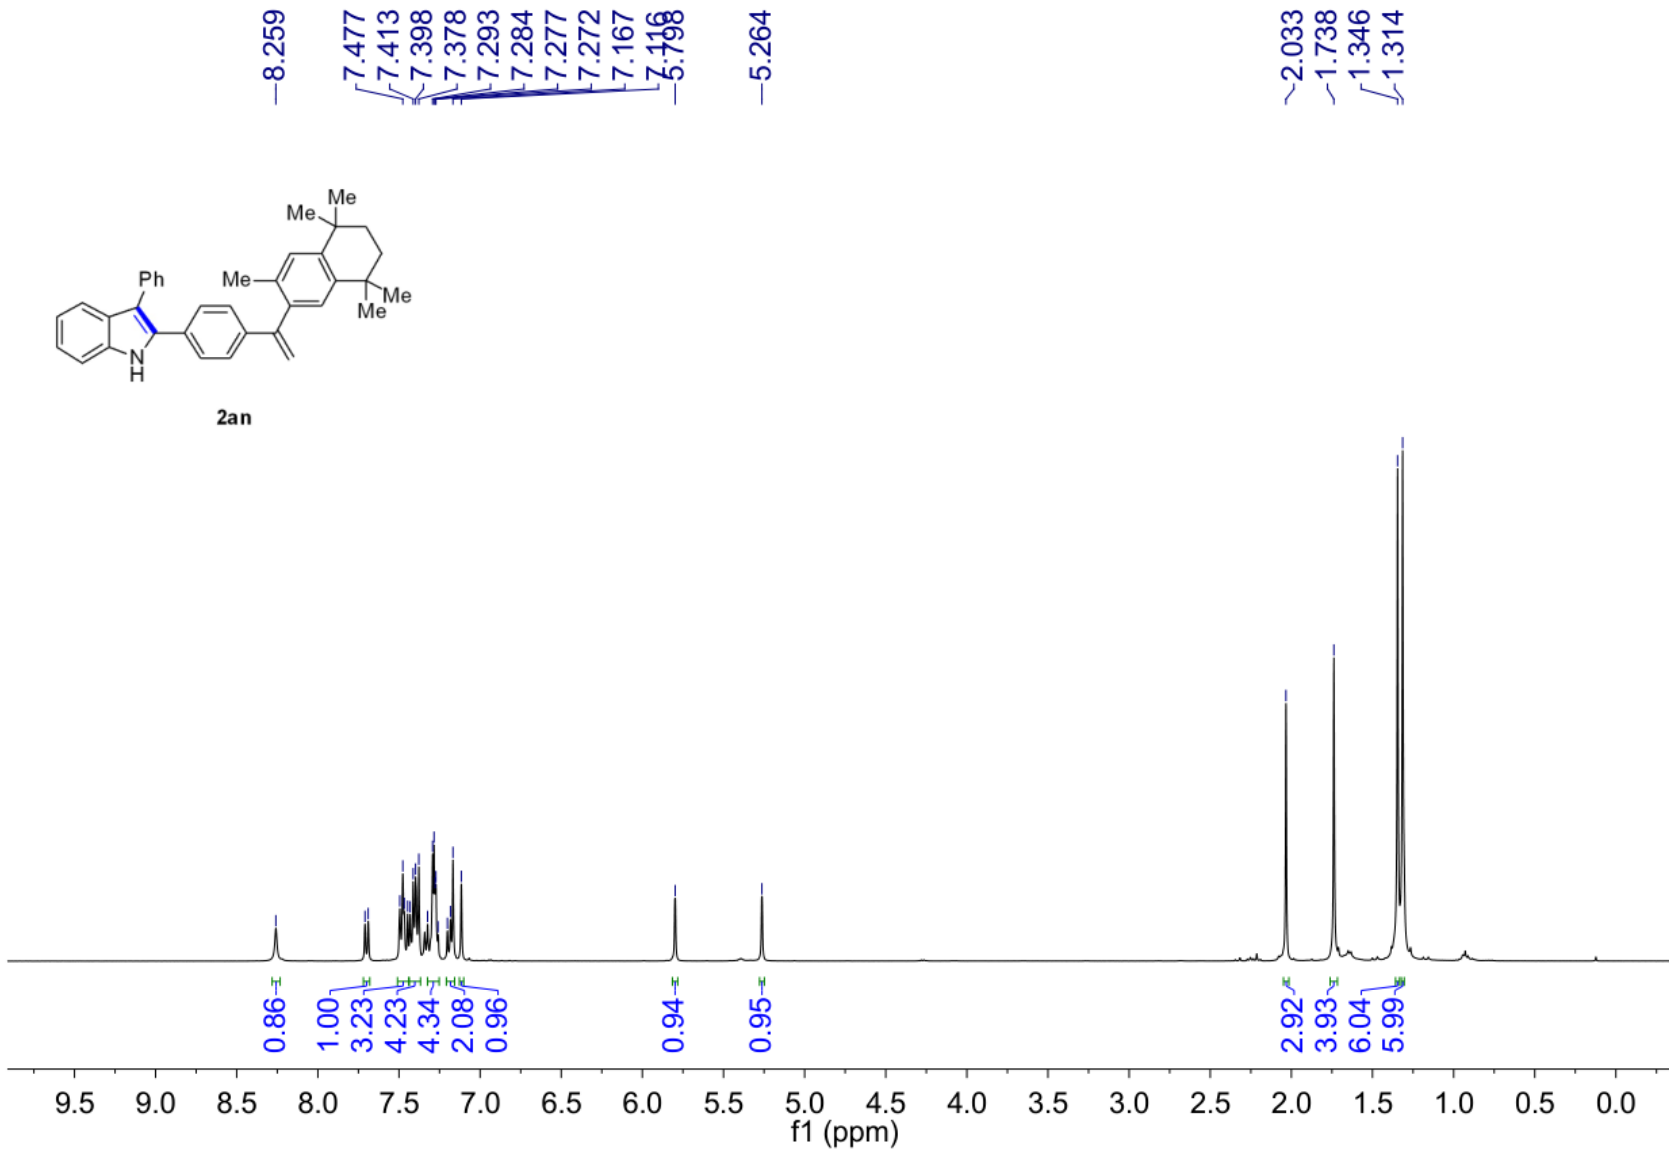

149.164  
144.081  
142.171  
140.149  
138.378  
135.911  
135.108  
133.803  
132.754  
131.624  
130.177  
128.896  
128.505  
128.054  
127.896  
127.836  
126.863  
126.240  
122.723  
120.419  
119.648  
115.243  
114.862  
110.819

77.317  
77.000  
76.682

35.234  
35.215  
33.964  
33.869  
31.924  
31.887

19.909

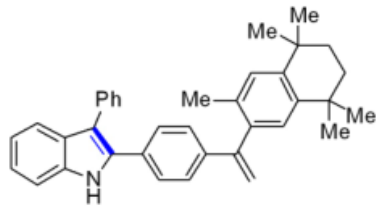

2an

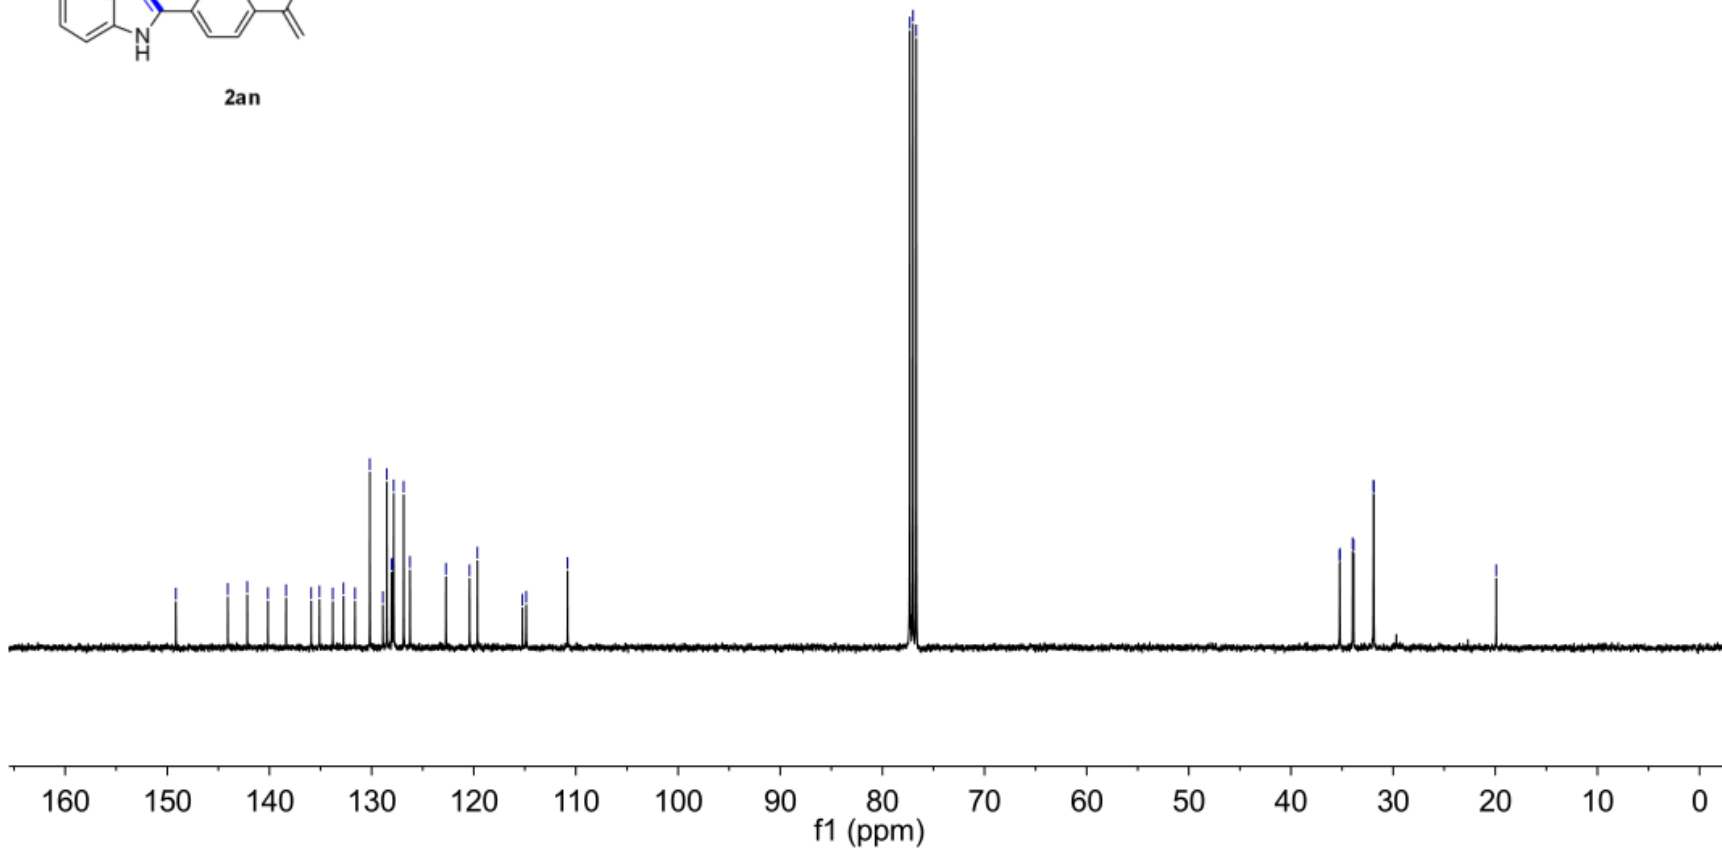

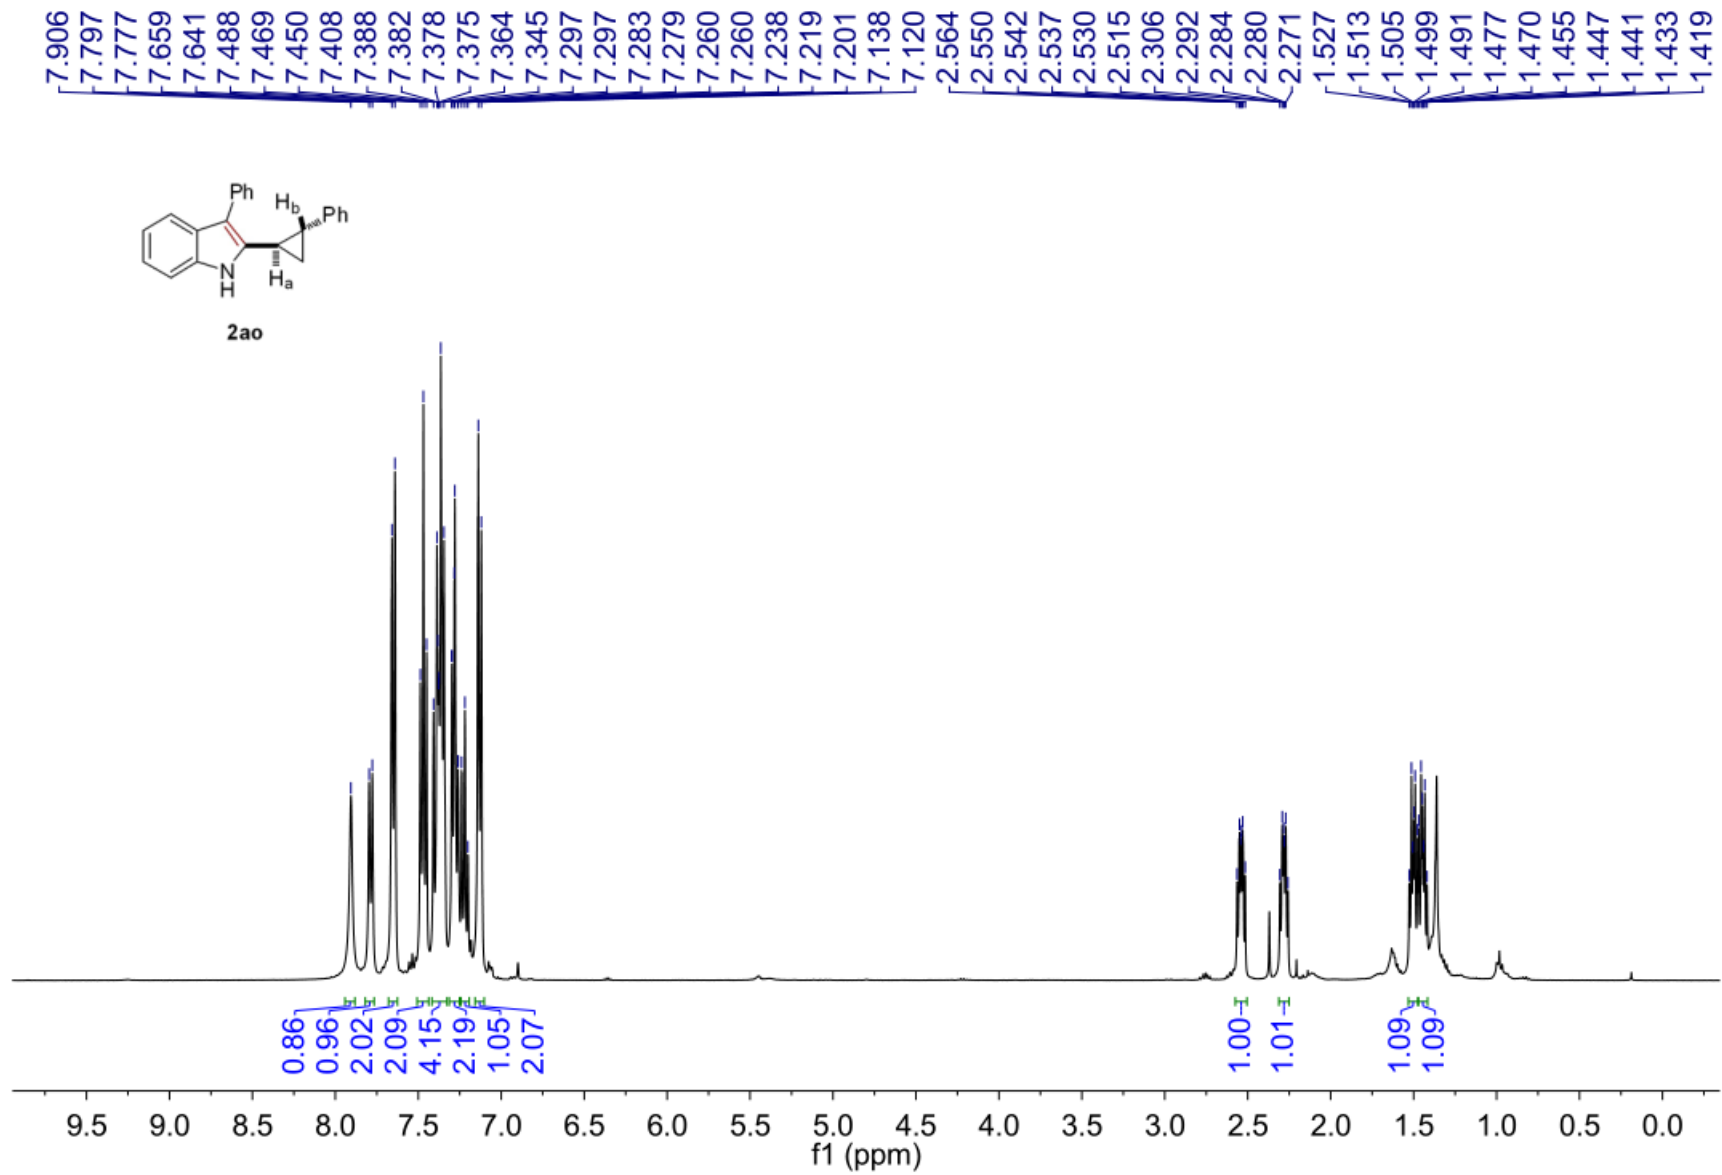



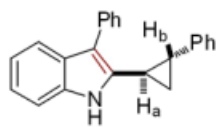

2ao

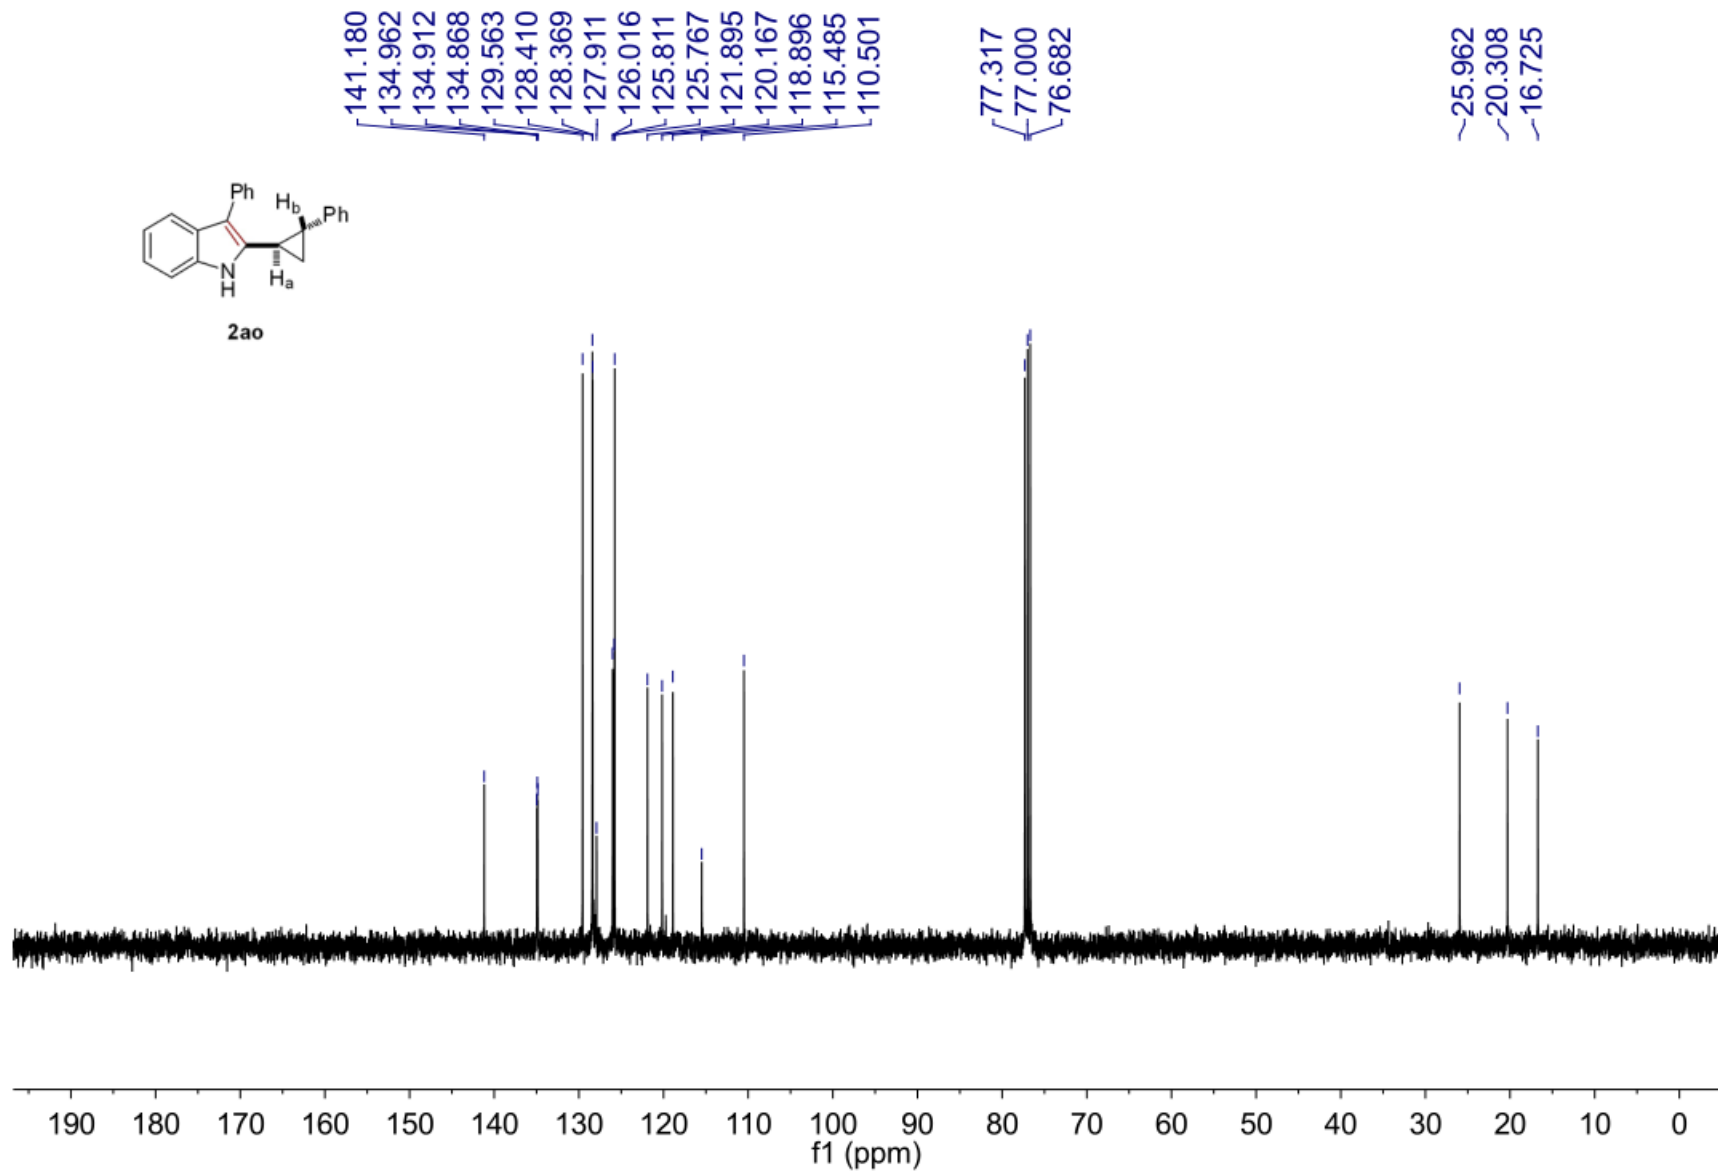

# COSY

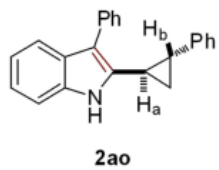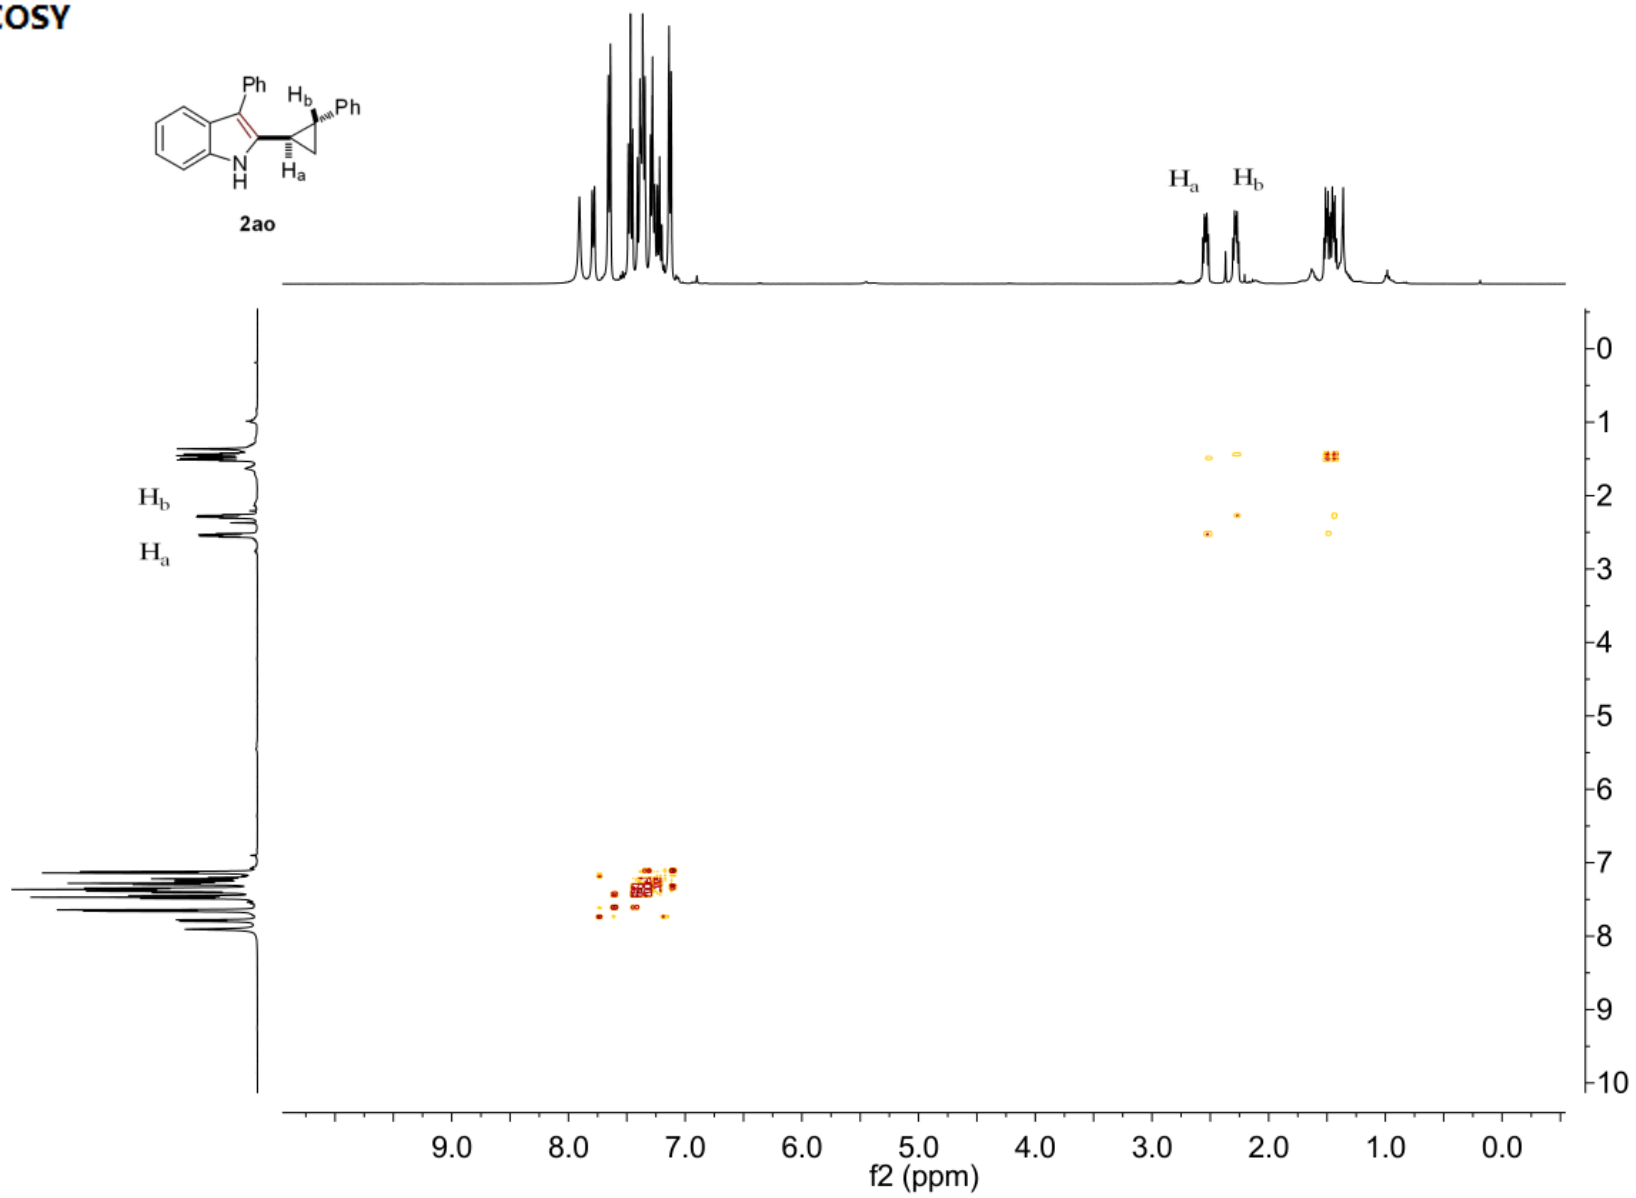

DEPT-135

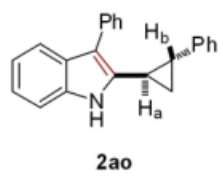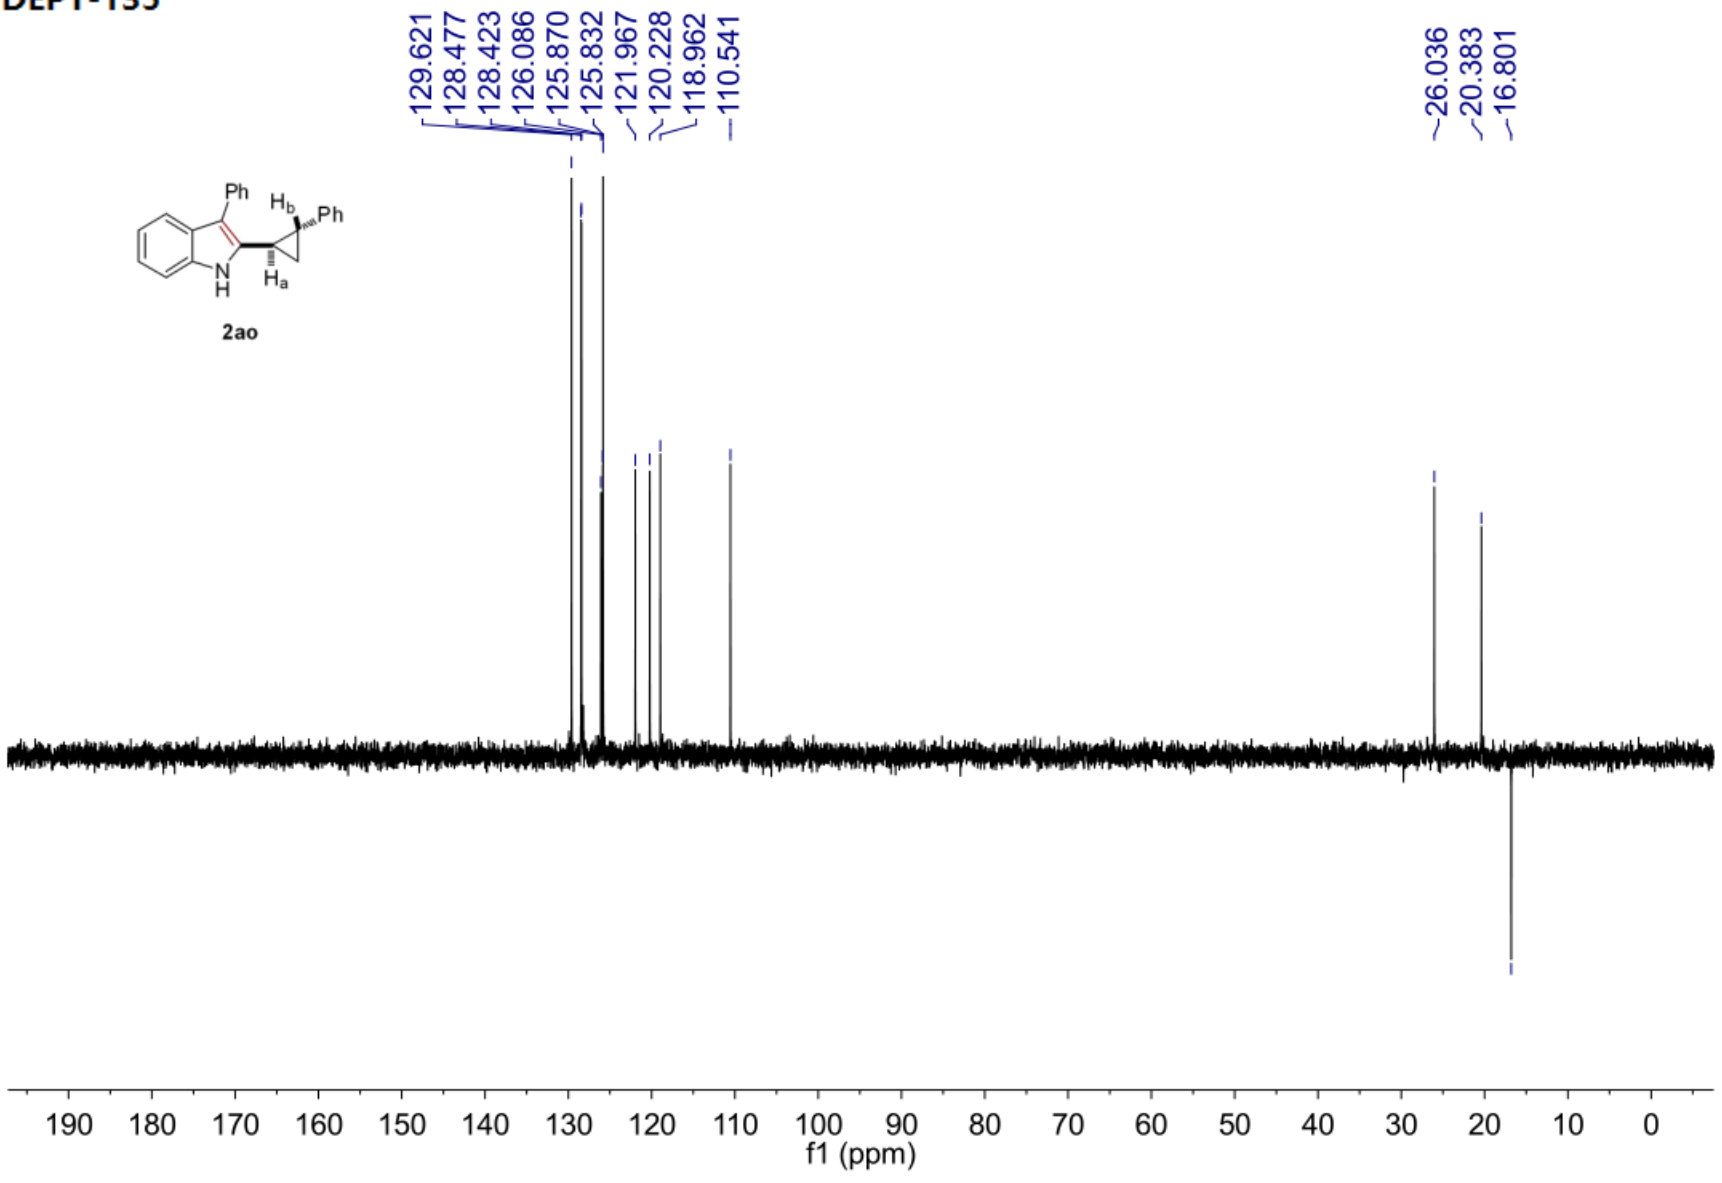

# HSQC

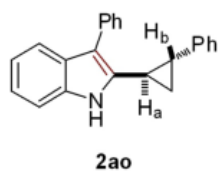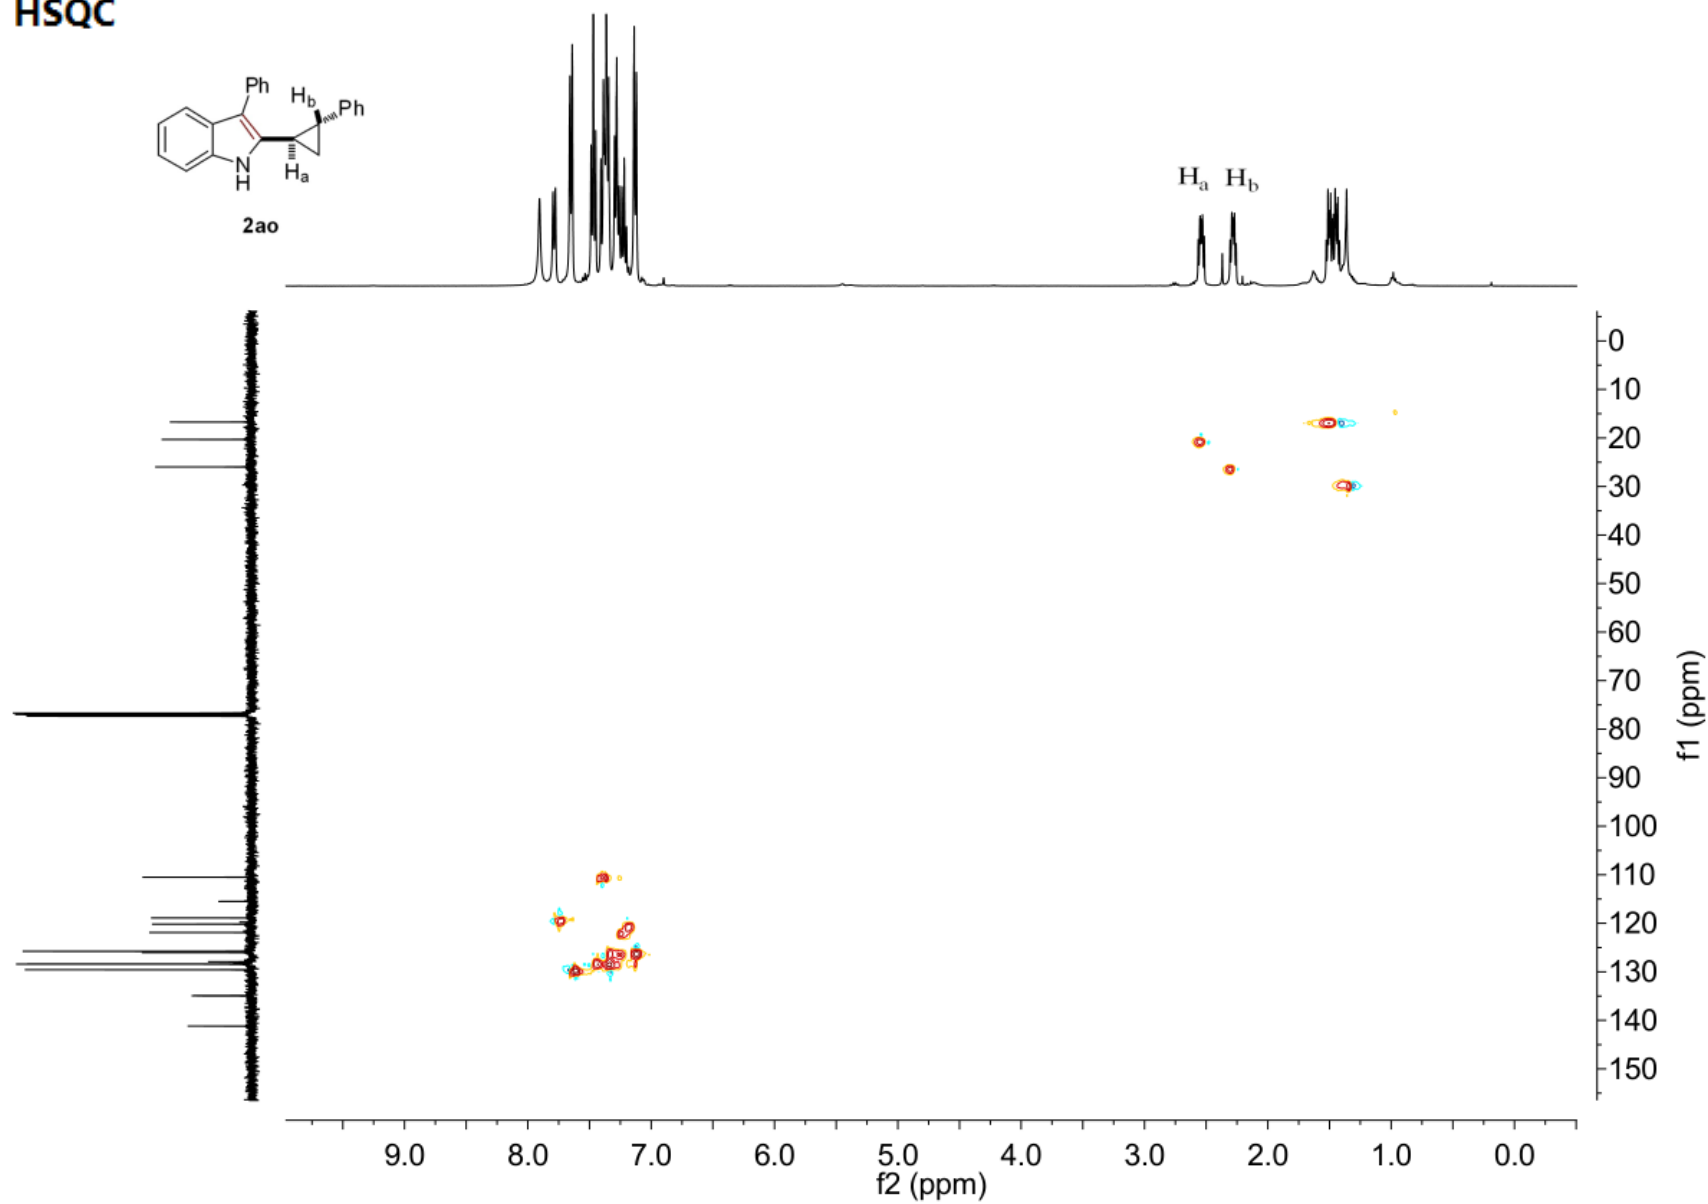

# HMBC

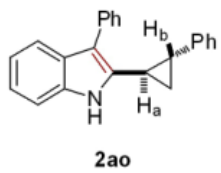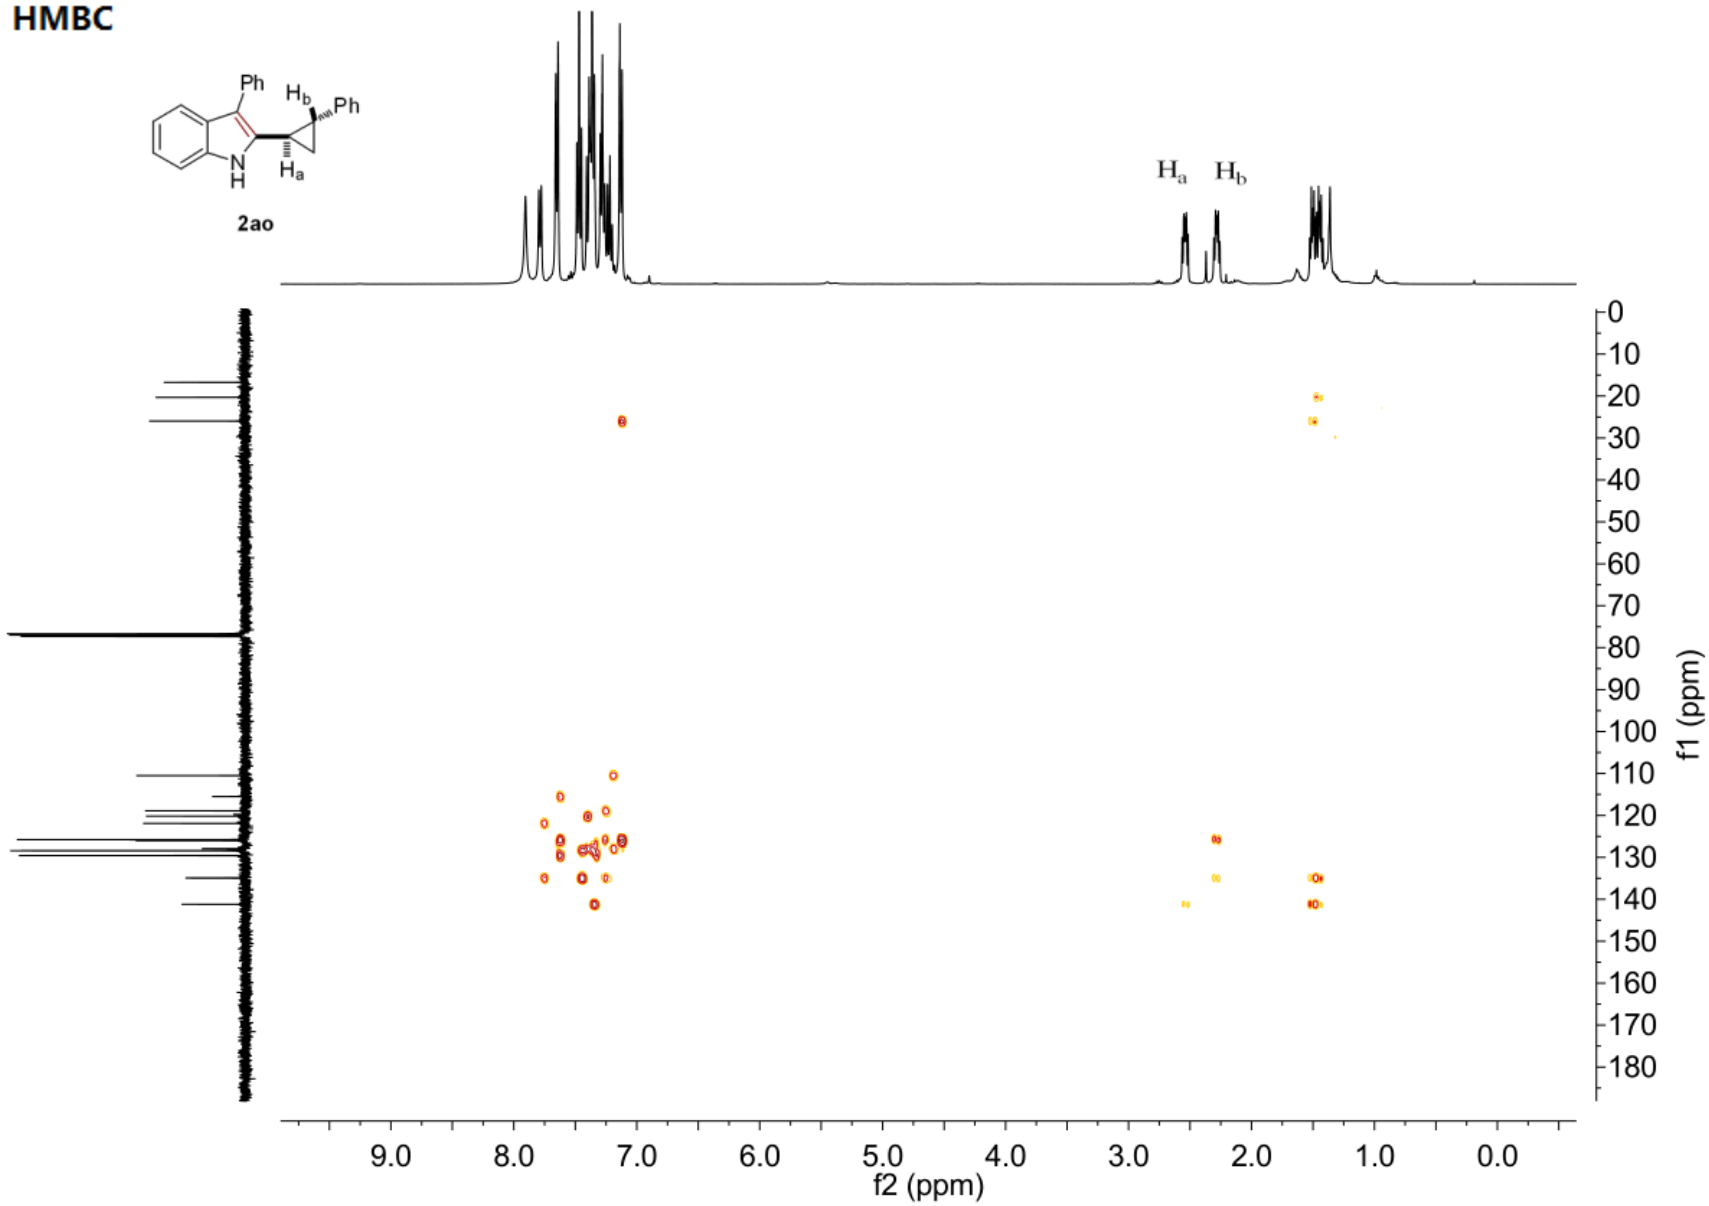

# NOESY

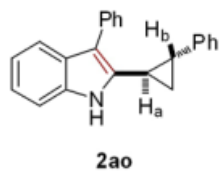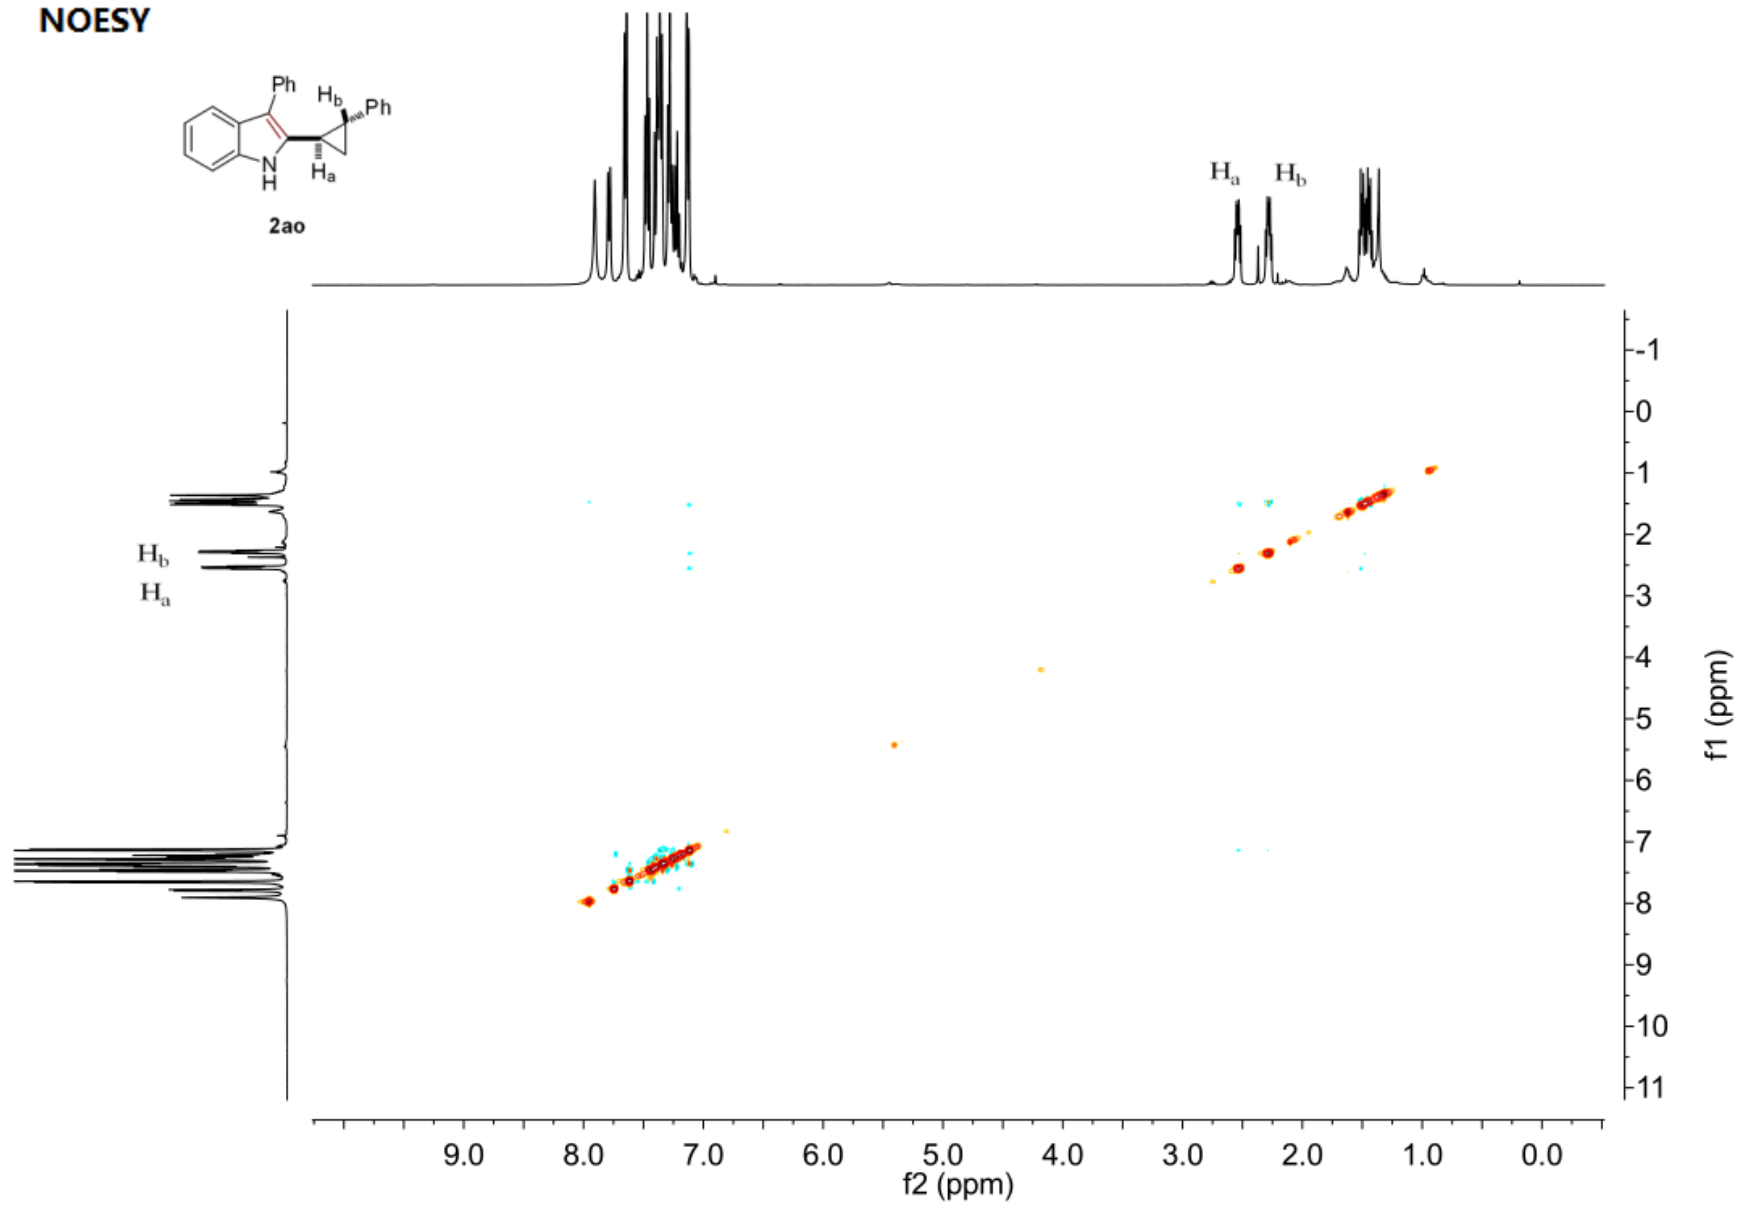

# NOESY

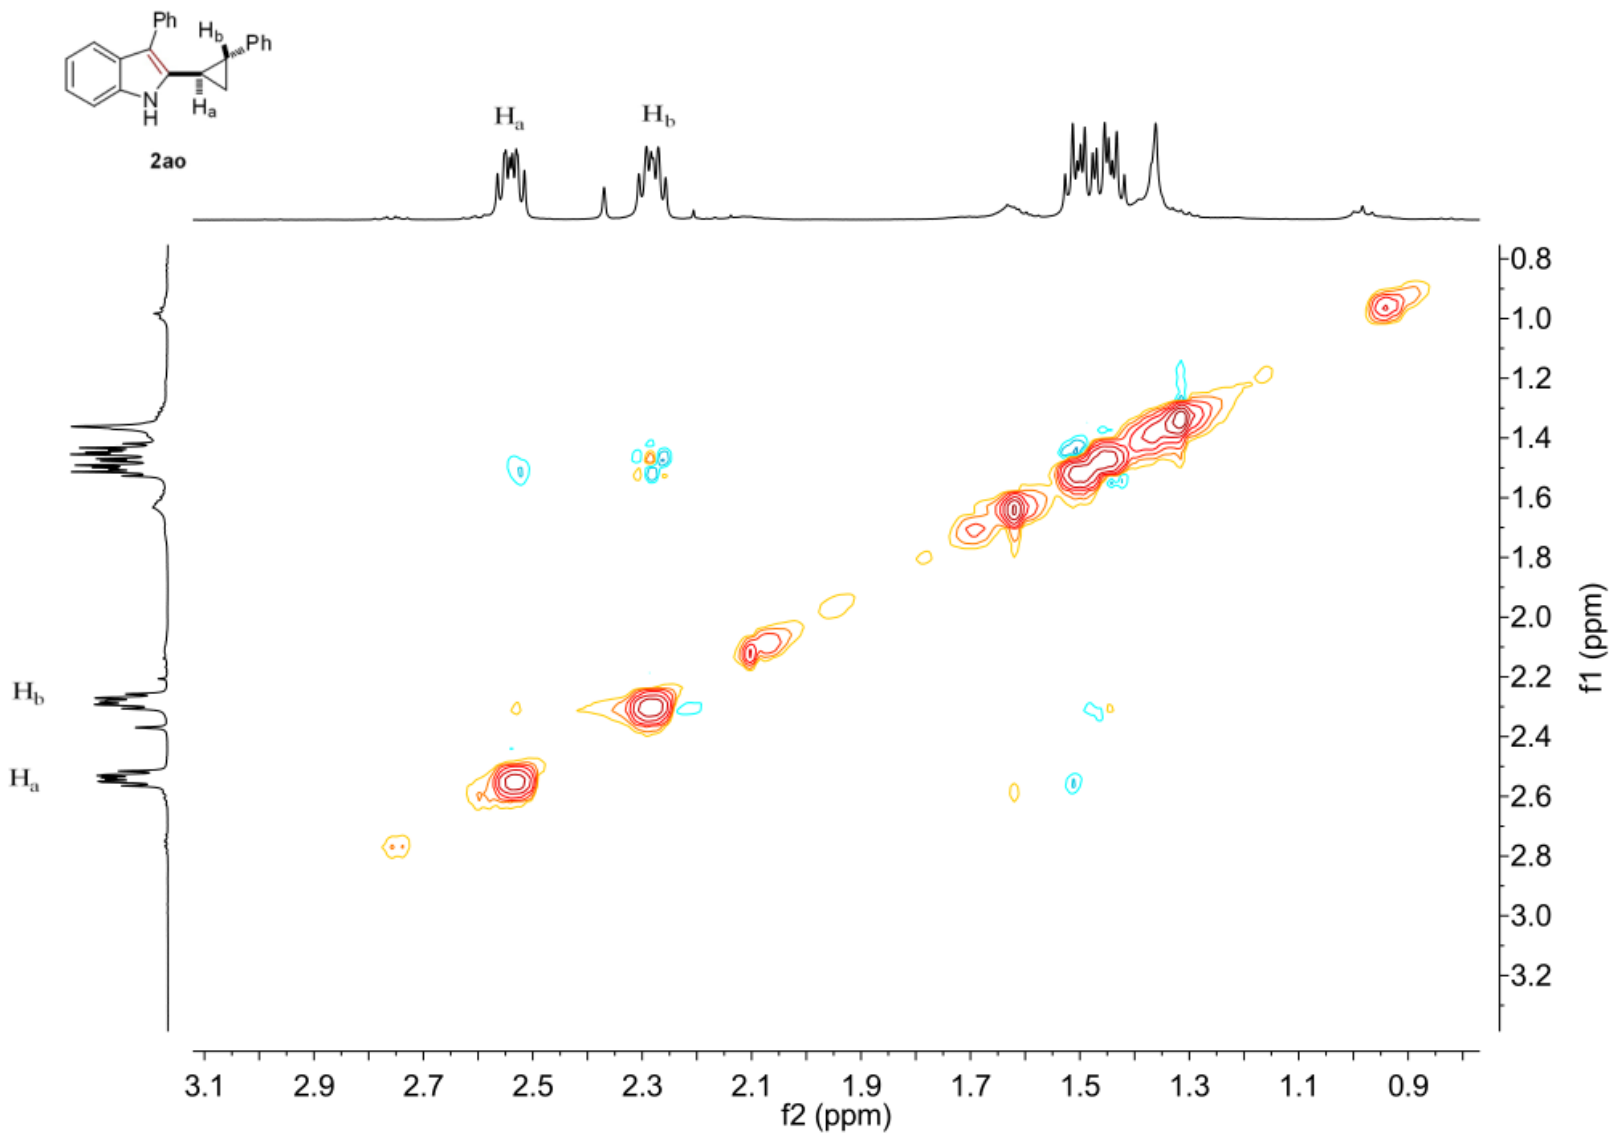

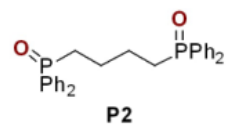

7.696  
7.676  
7.668  
7.649  
7.484  
7.467  
7.450  
7.411  
7.397

-2.235

-1.696

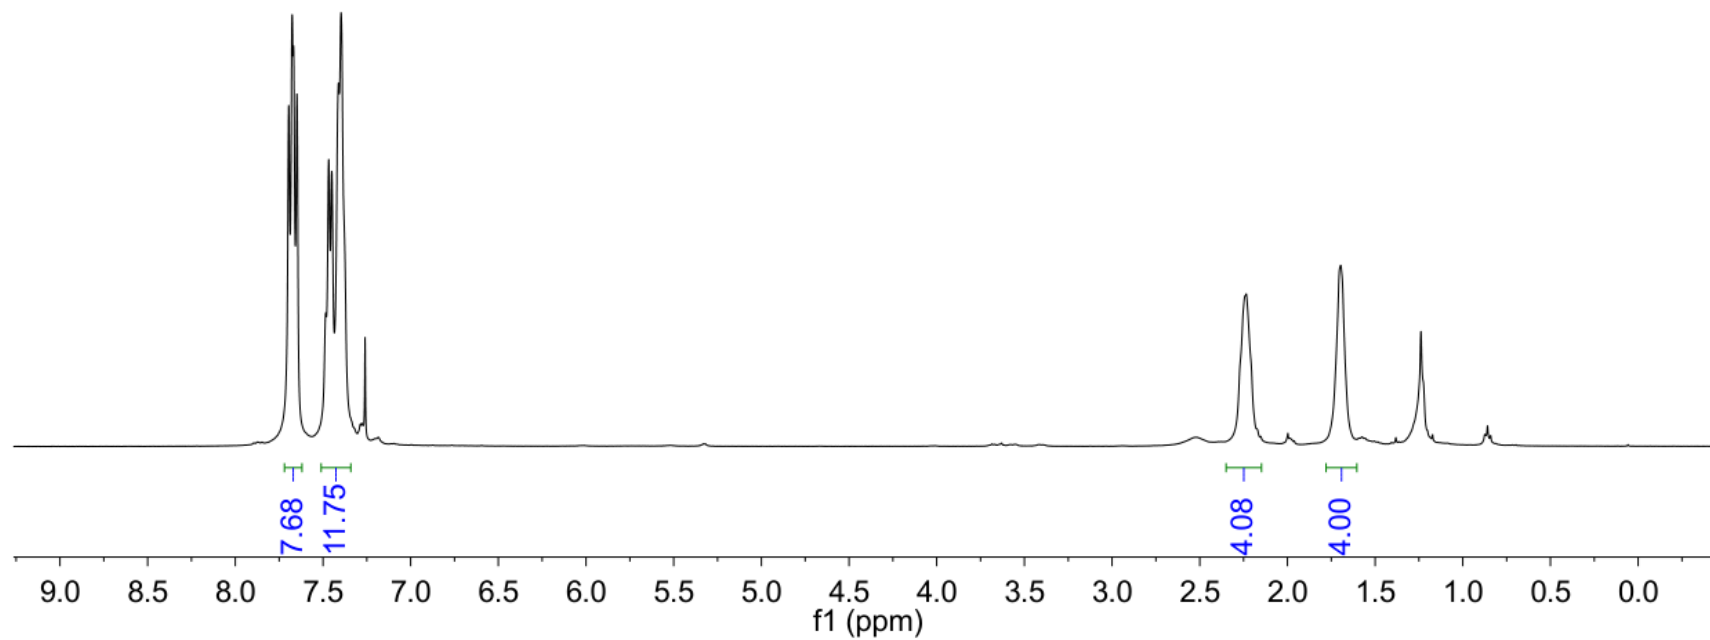



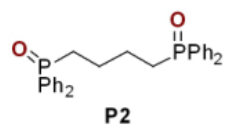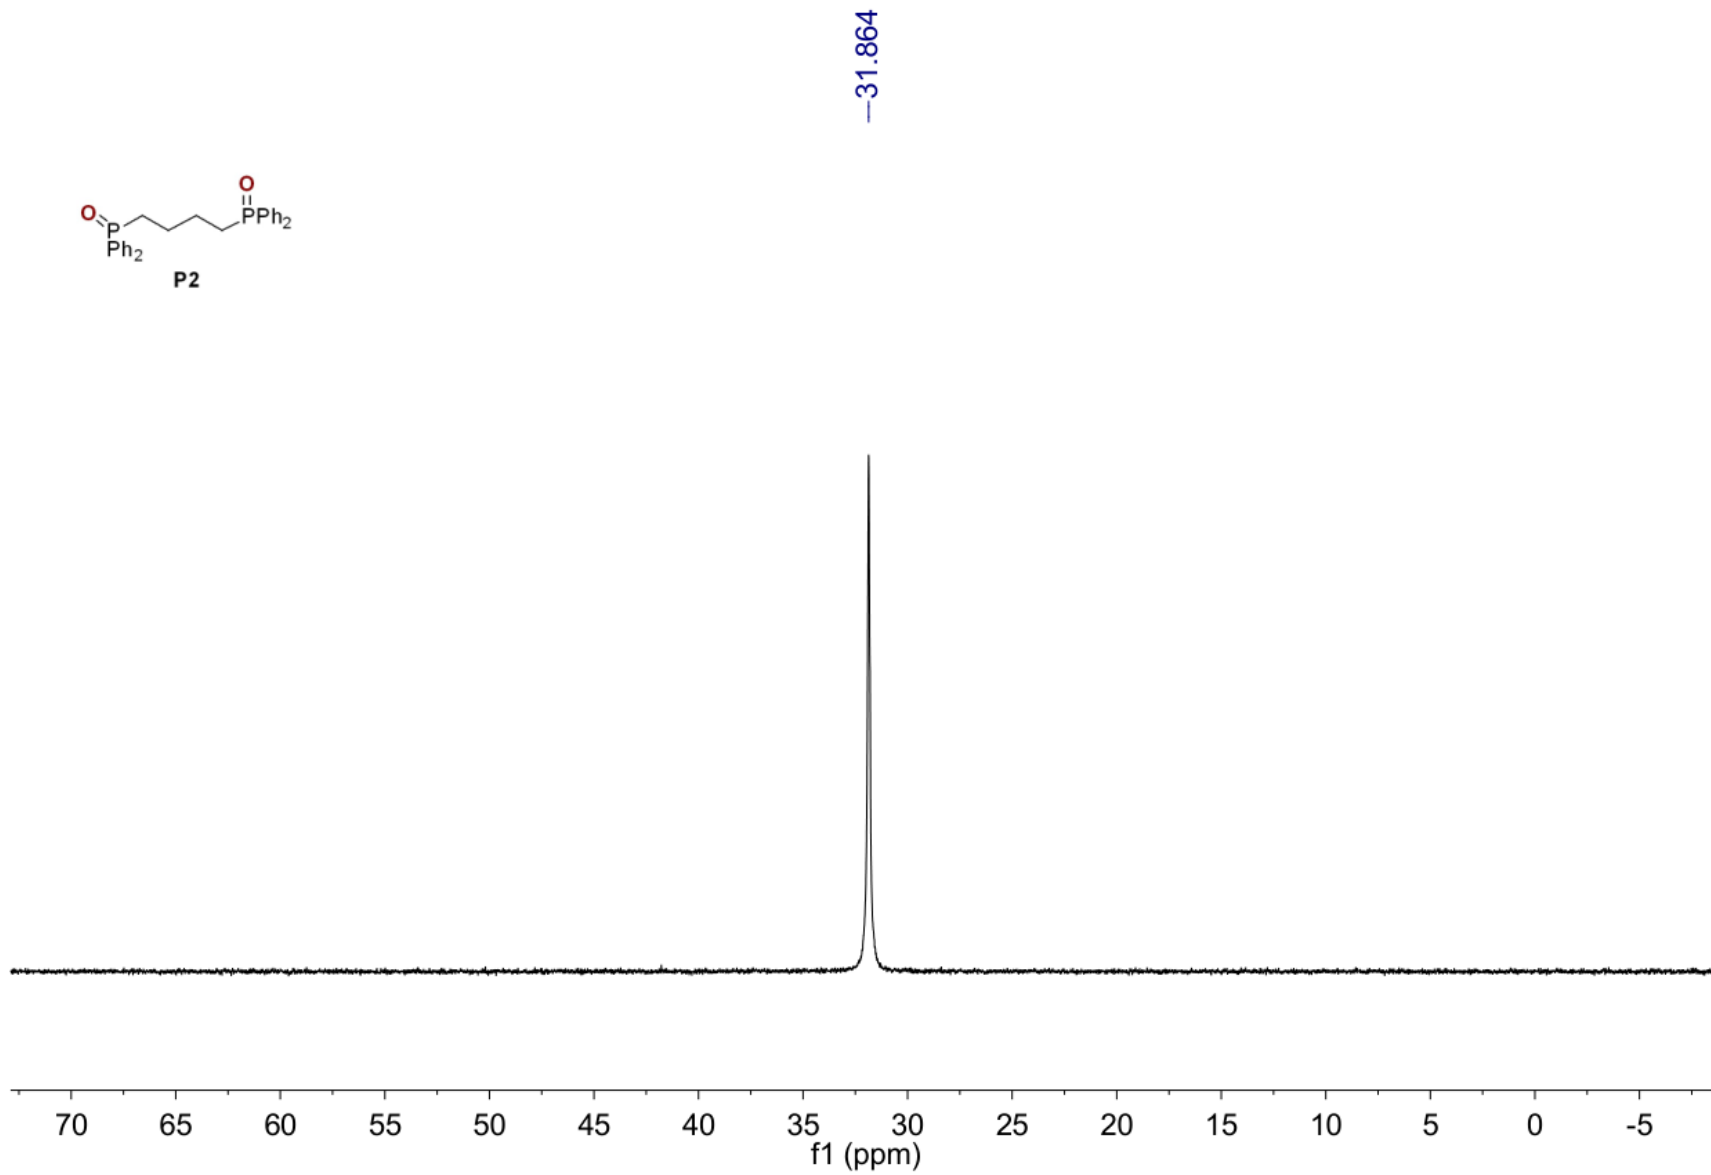

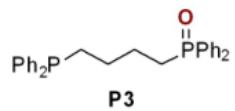

7.725  
 7.706  
 7.698  
 7.679  
 7.499  
 7.483  
 7.459  
 7.444  
 7.360  
 7.305  
 7.298

2.264  
 2.237  
 2.225  
 2.197  
 2.033  
 2.016  
 1.997  
 1.724  
 1.530

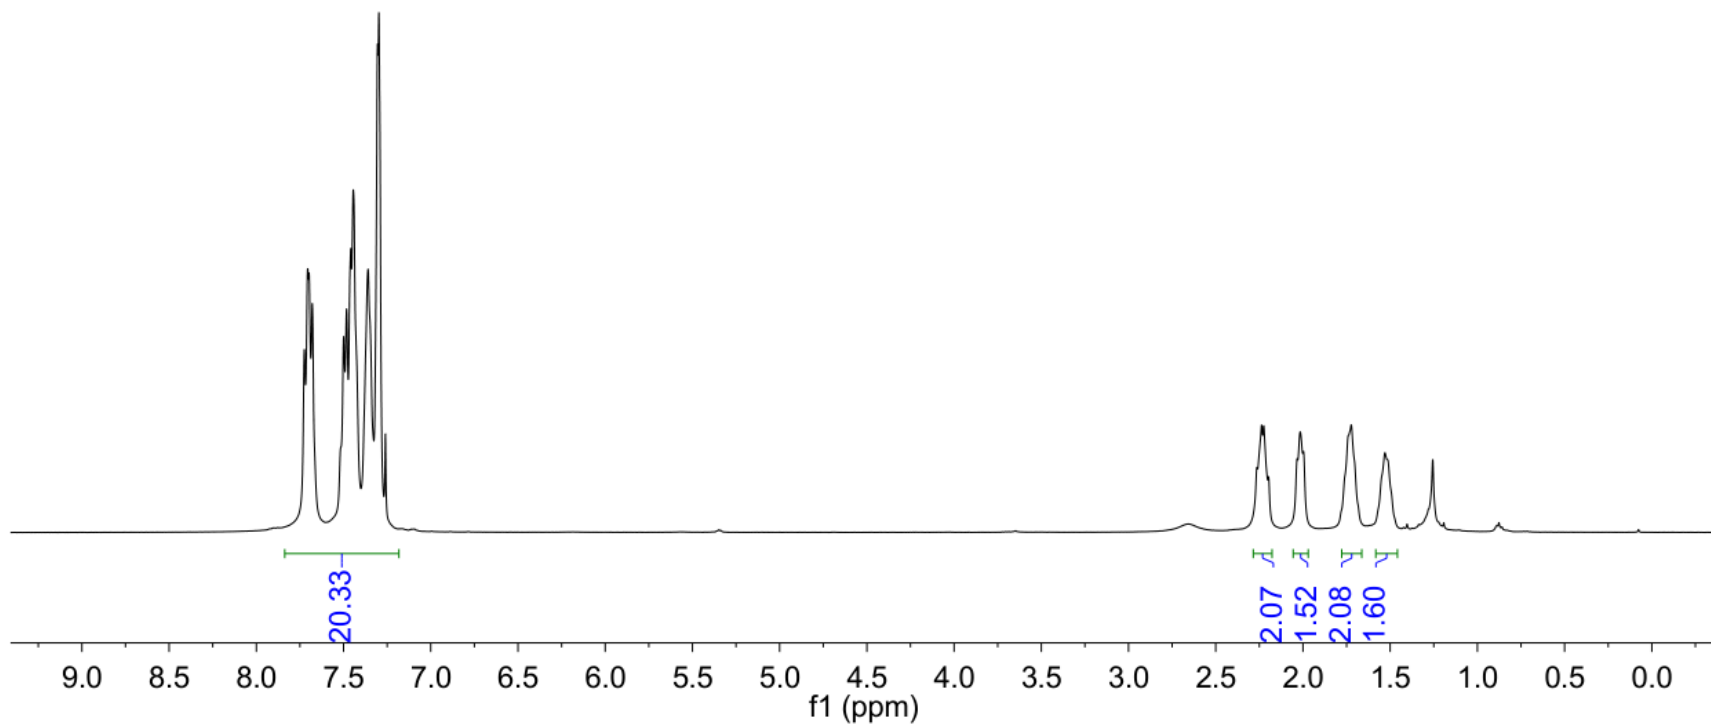

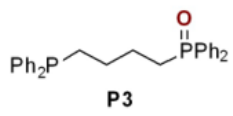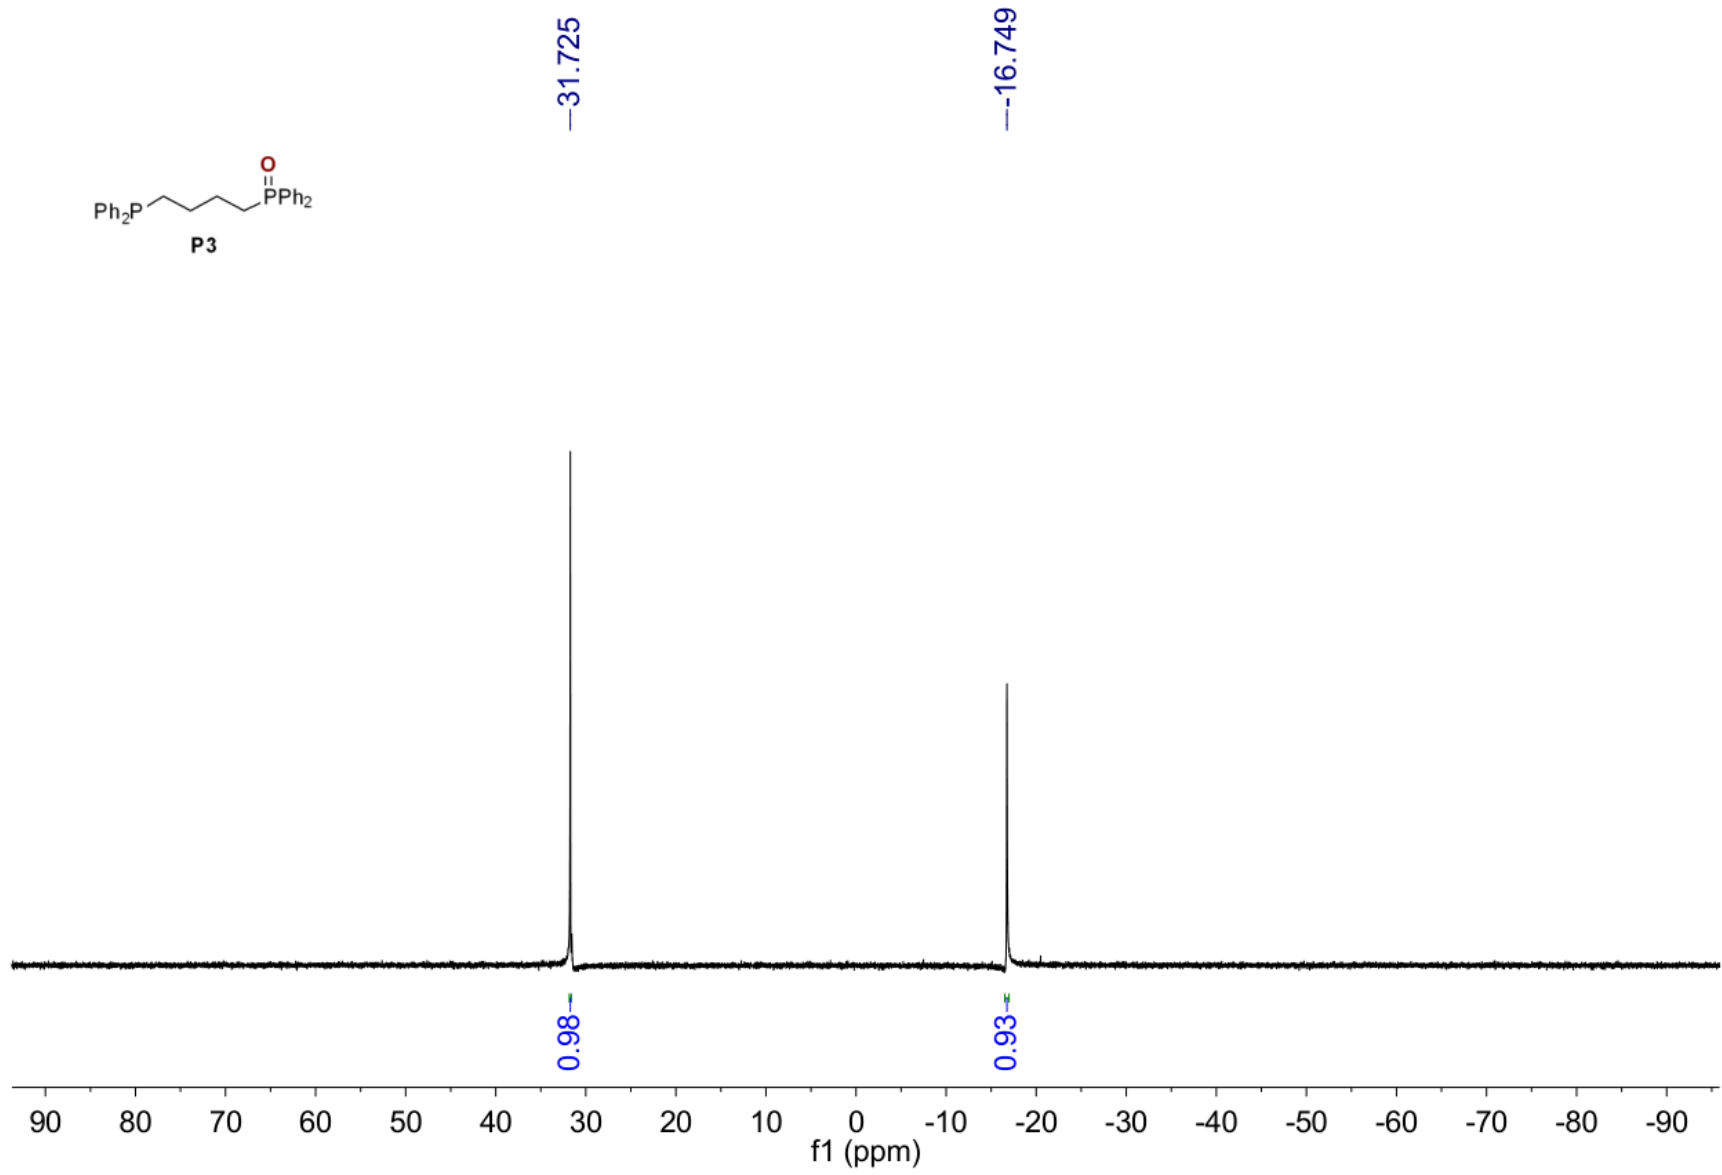

7.815  
7.722  
7.718  
7.713  
7.706  
7.702  
7.698  
7.692  
7.557  
7.553  
7.552  
7.548  
7.533  
7.527  
7.513  
7.509  
7.476  
7.471  
7.467  
7.455  
7.451  
7.449  
7.440  
7.436  
7.429  
7.425  
7.421  
7.415  
7.408  
7.399  
7.393  
7.389  
7.386  
7.379  
7.378  
7.360  
7.319  
7.316  
7.300  
7.297  
7.281  
7.278  
7.260

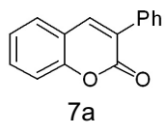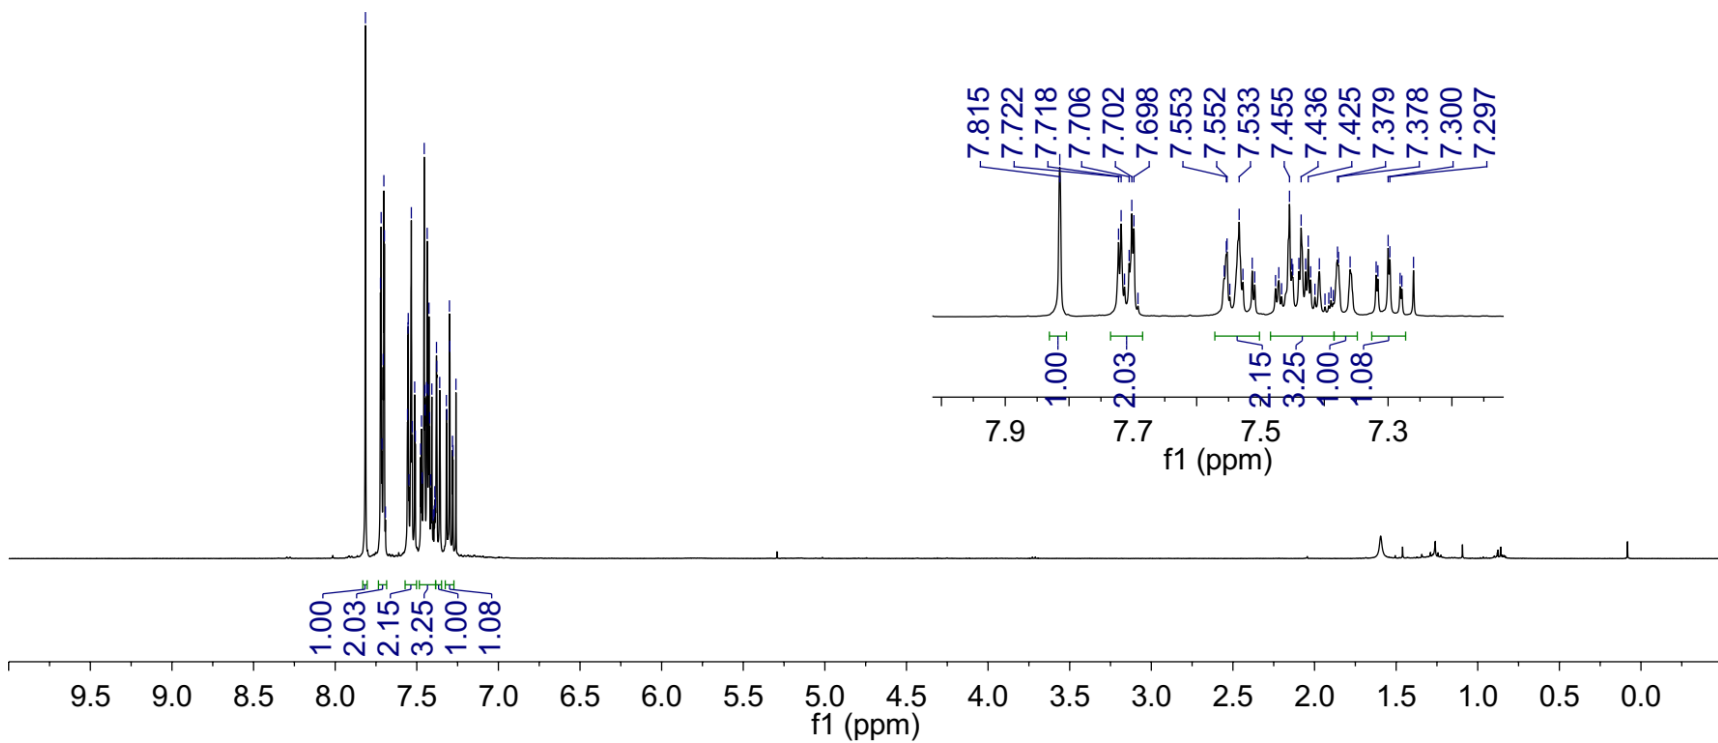

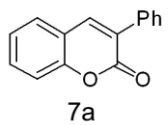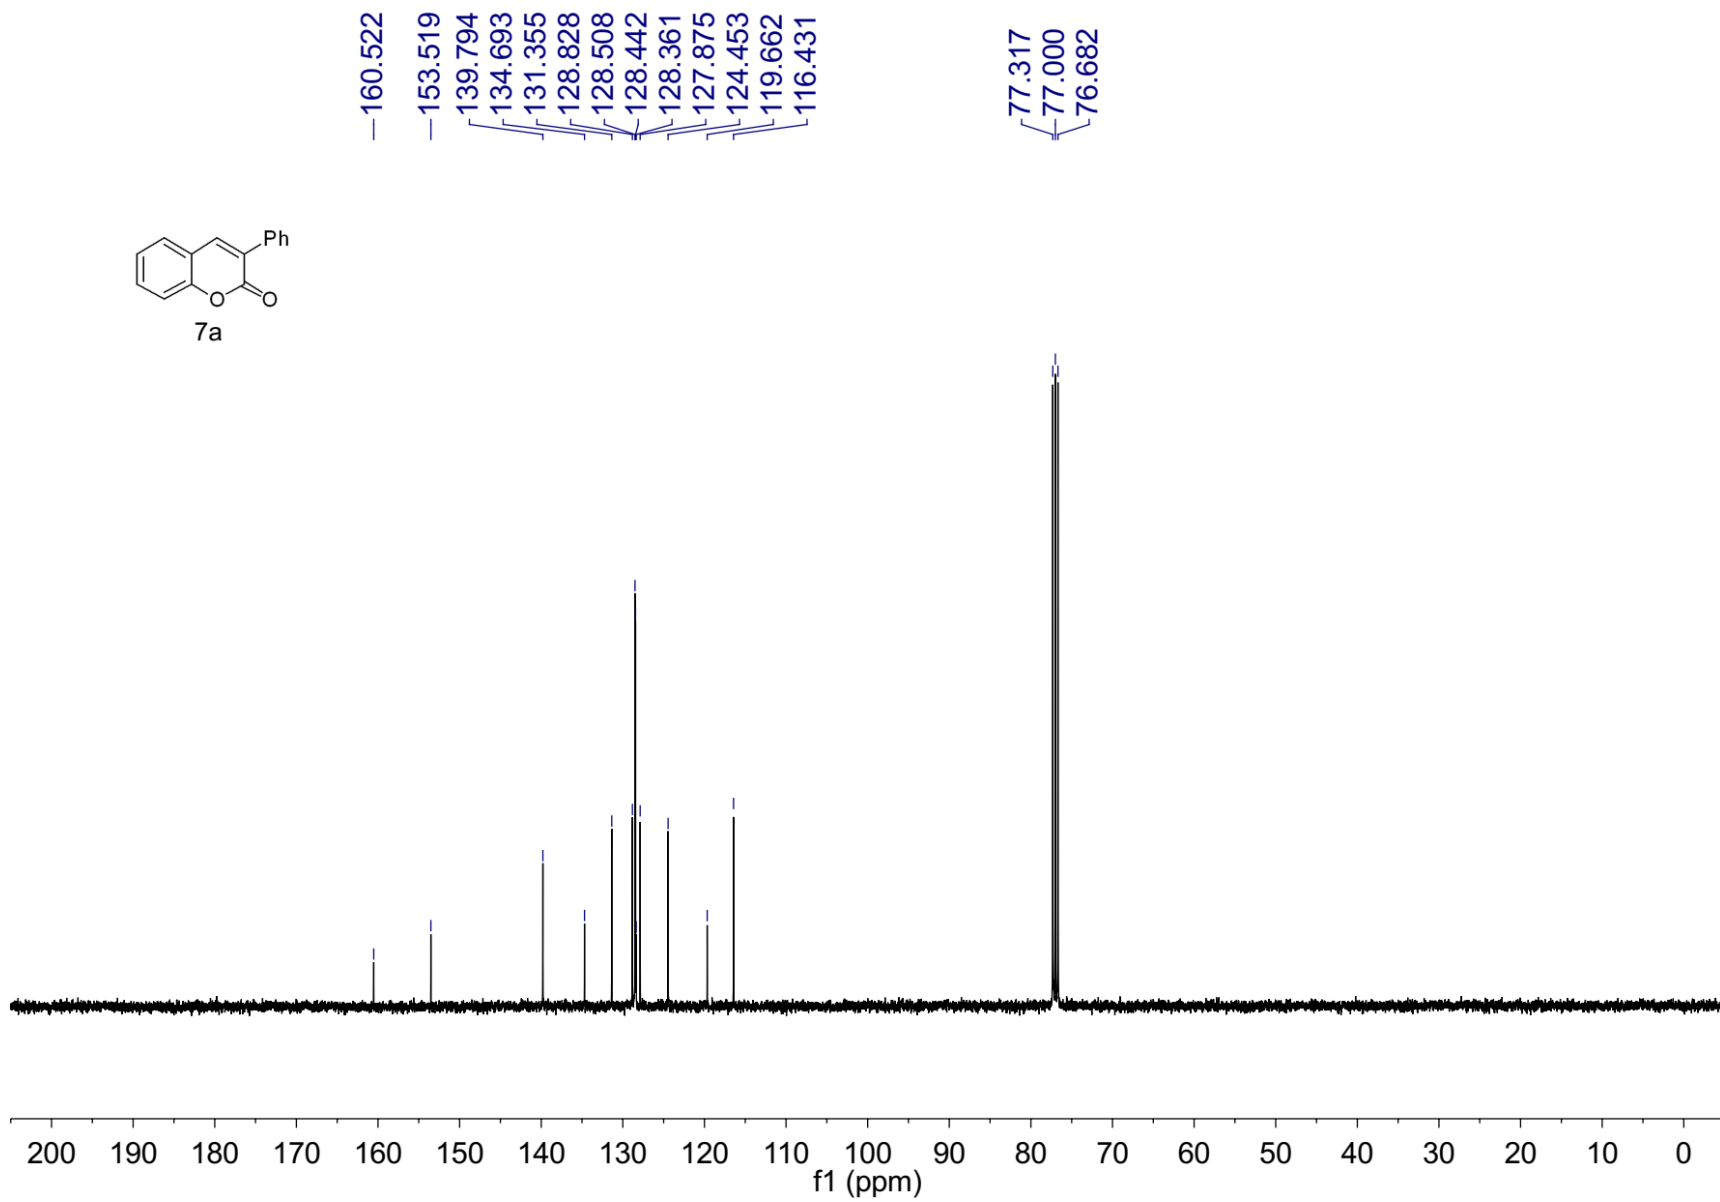

8.563  
8.297  
8.276  
7.982  
7.960  
7.926  
7.906  
7.818  
7.814  
7.809  
7.801  
7.797  
7.794  
7.788  
7.709  
7.706  
7.692  
7.689  
7.685  
7.671  
7.668  
7.593  
7.590  
7.575  
7.573  
7.570  
7.555  
7.552  
7.520  
7.516  
7.512  
7.499  
7.495  
7.484  
7.480  
7.478  
7.477  
7.463  
7.459  
7.456  
7.447  
7.441  
7.434  
7.426  
7.423  
7.419  
7.260

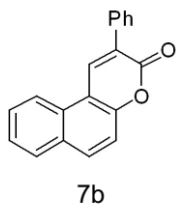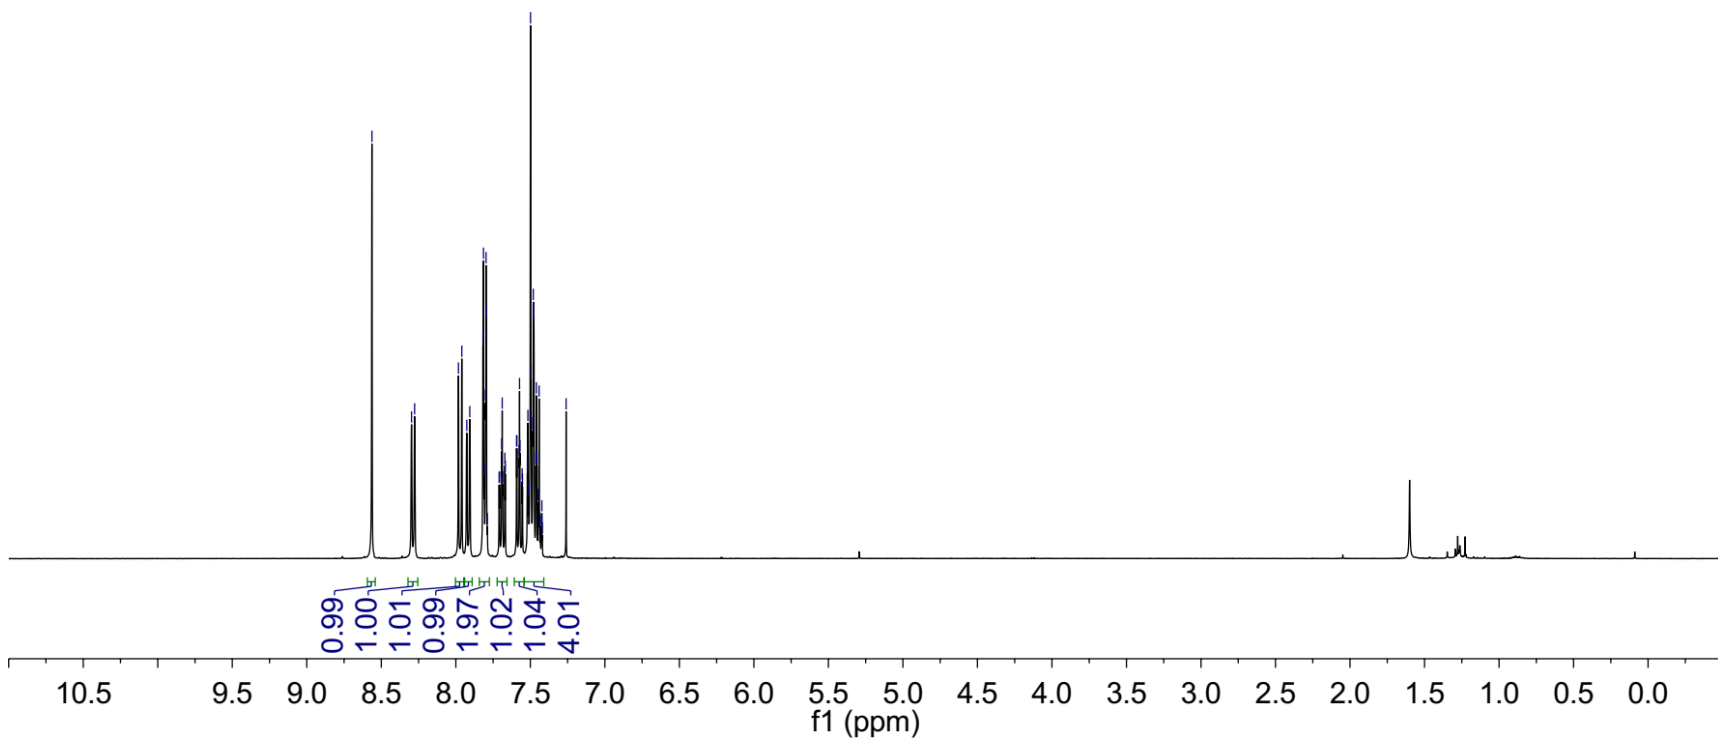

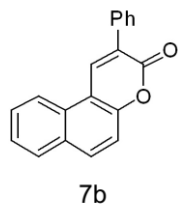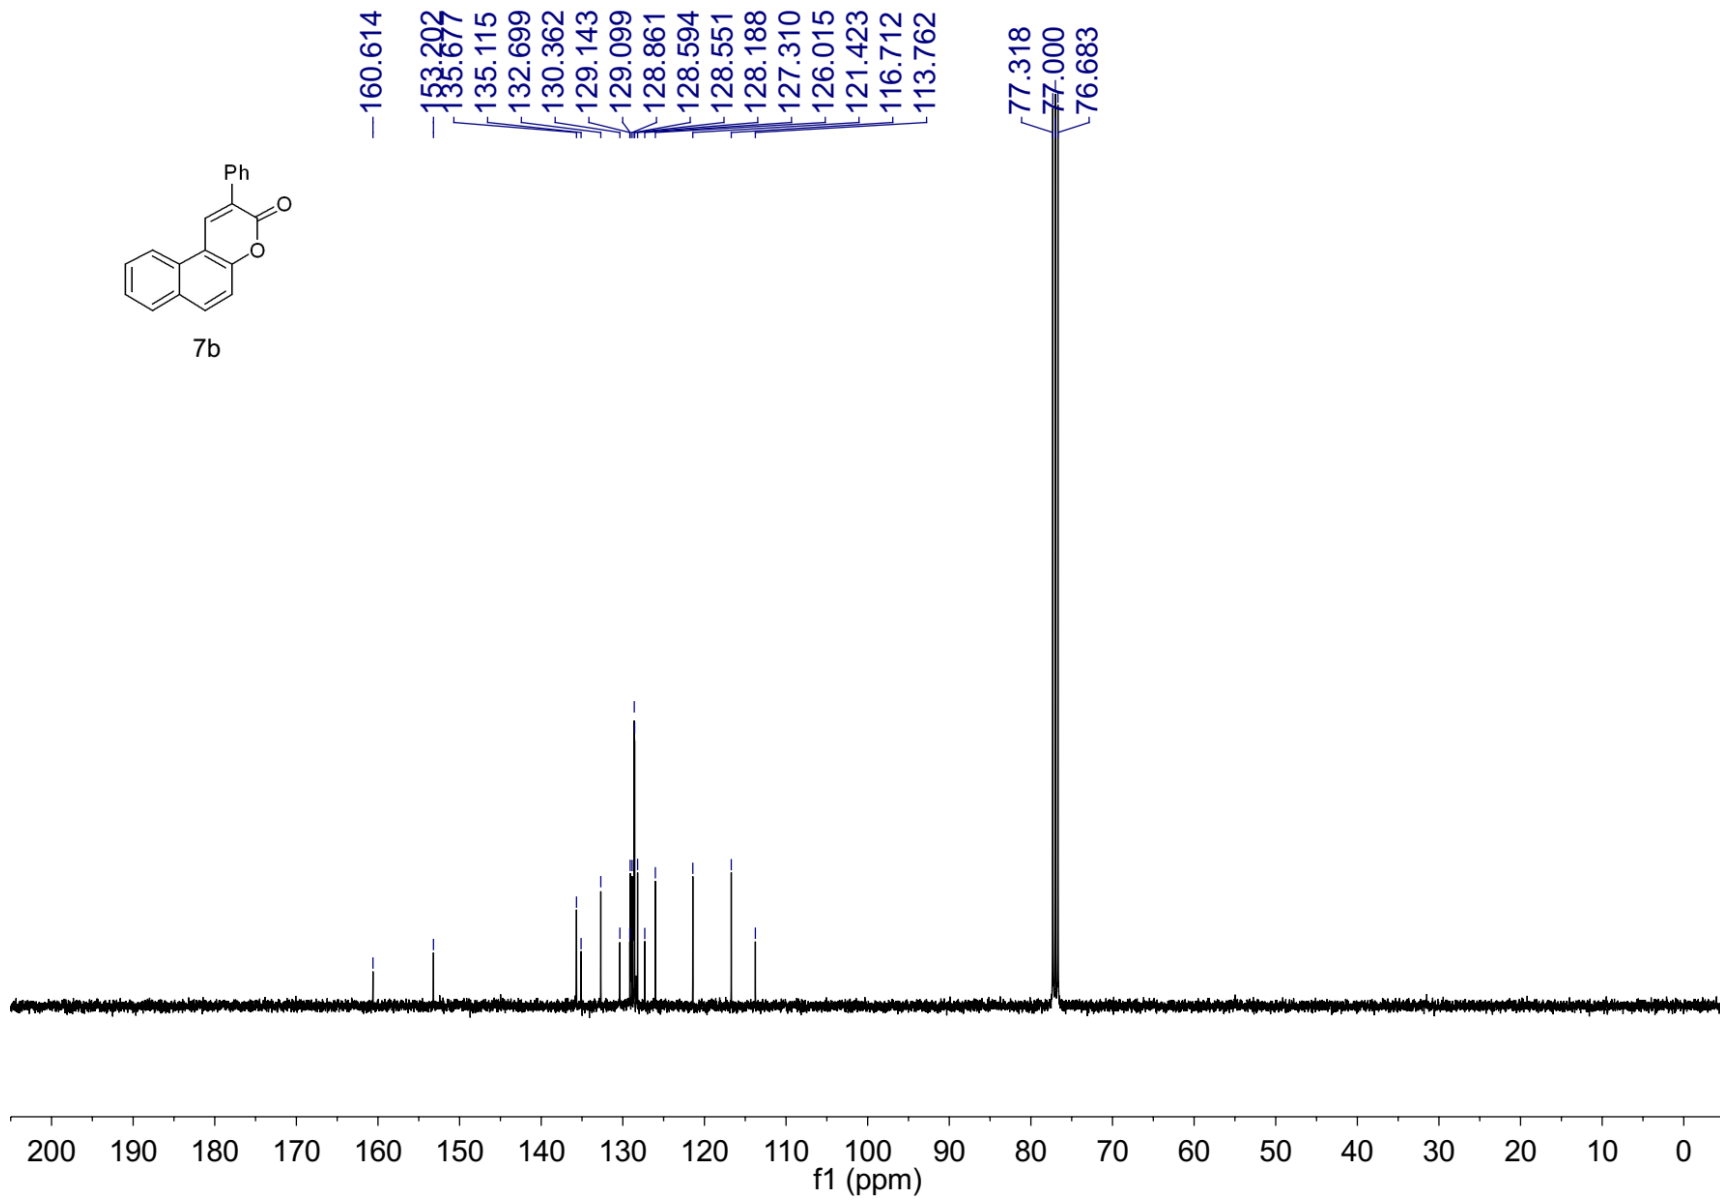

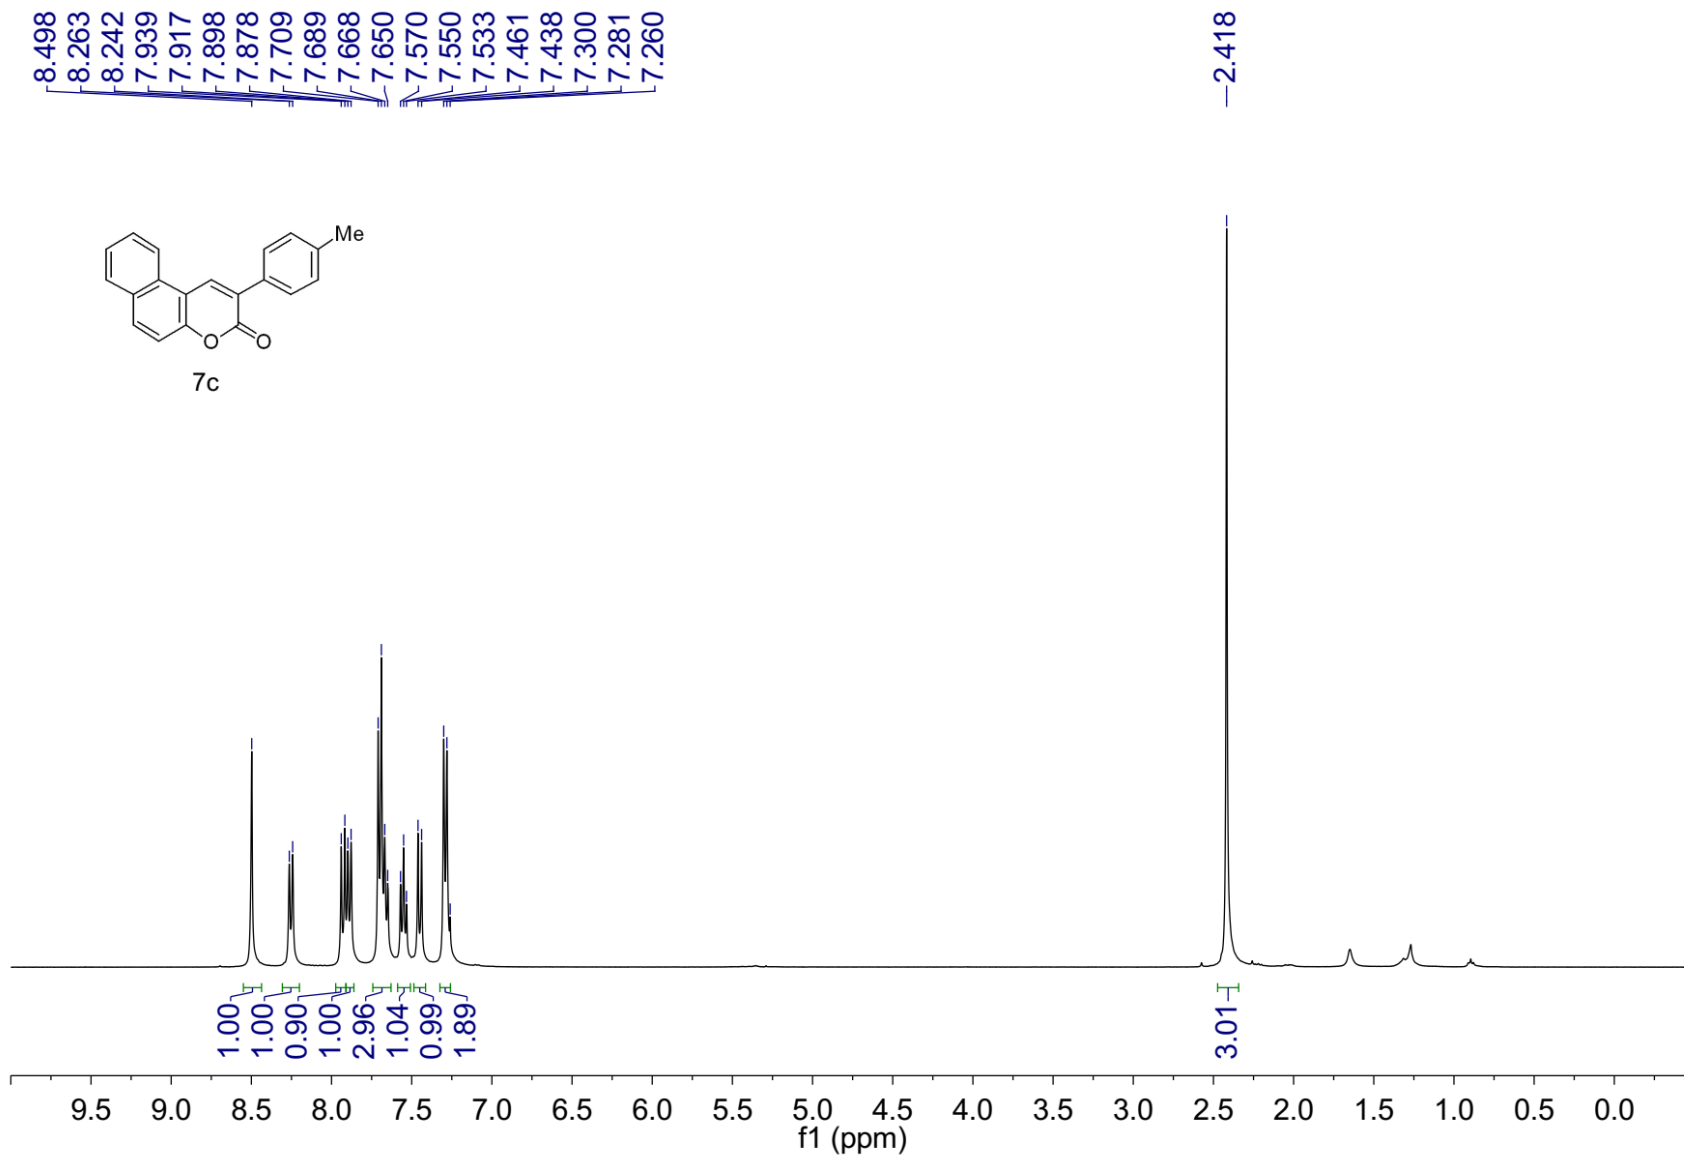



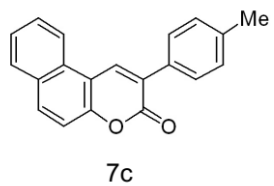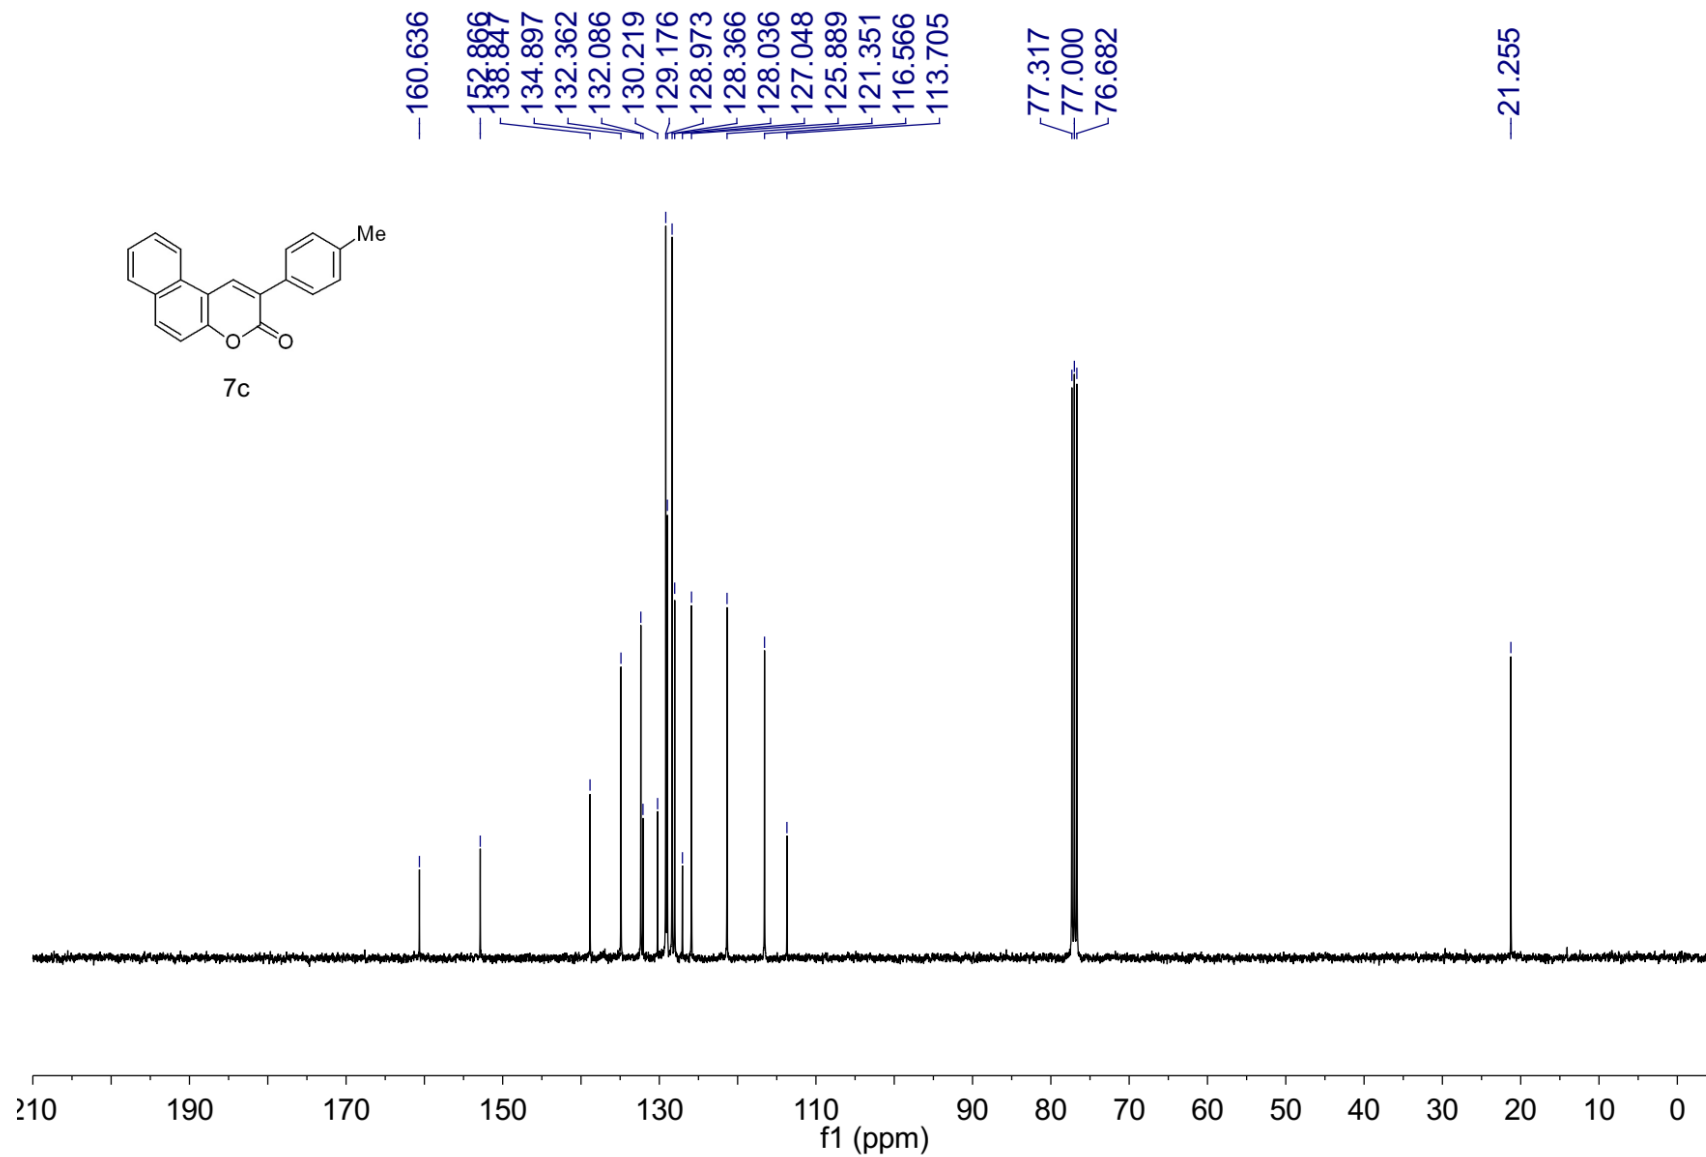

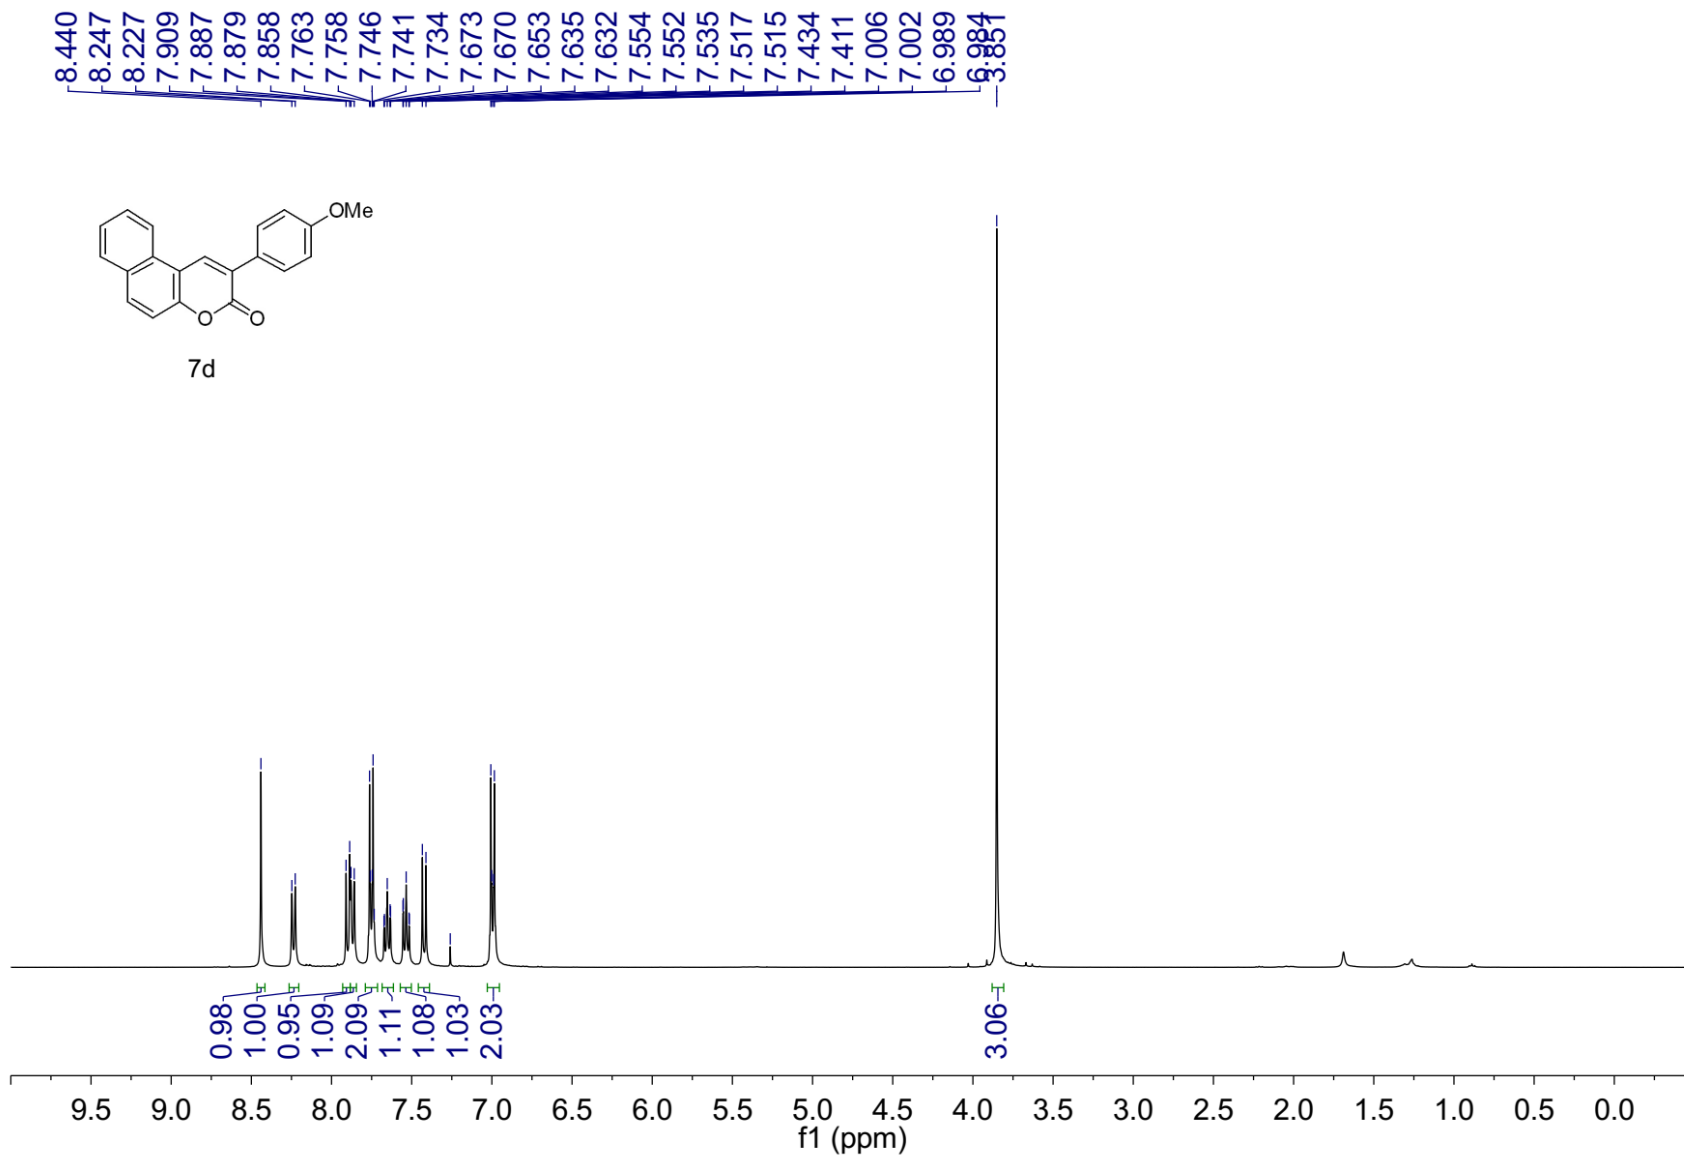

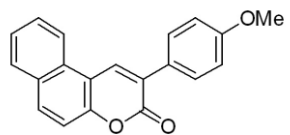

7d

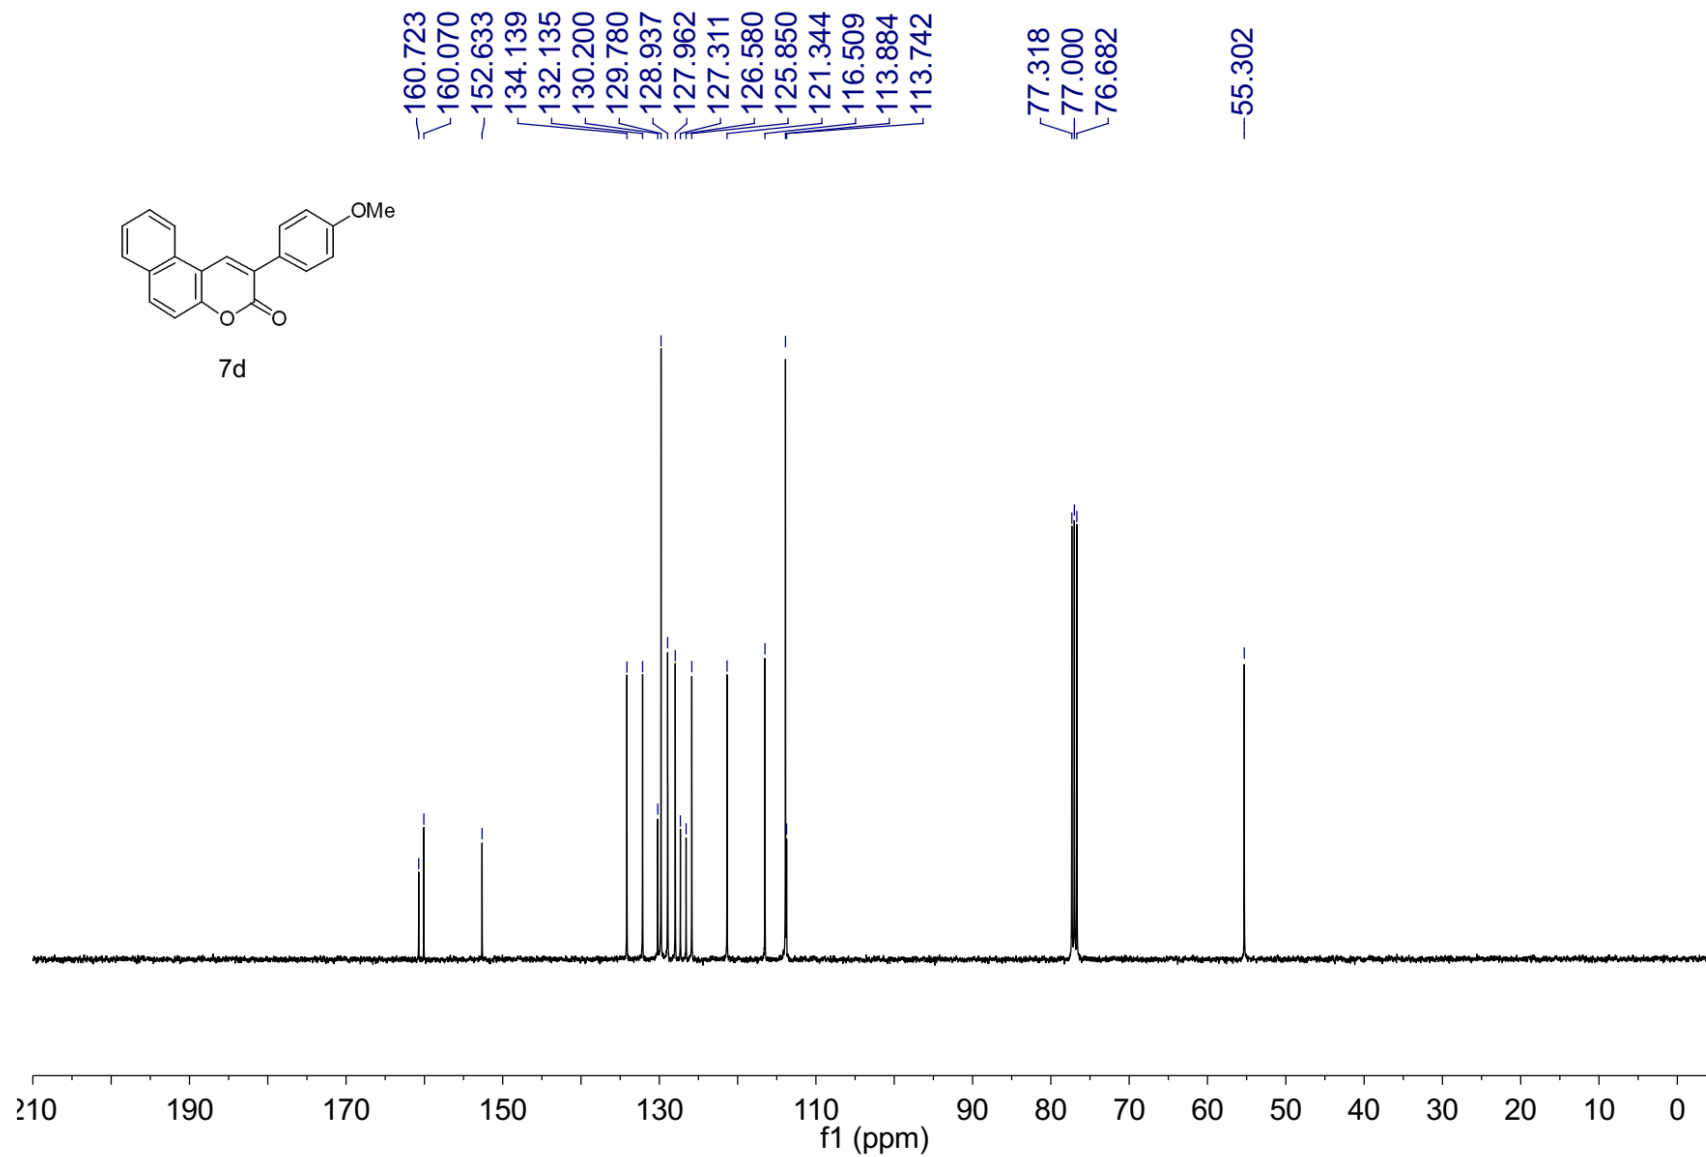

8.575  
8.295  
8.274  
7.999  
7.977  
7.929  
7.909  
7.721  
7.718  
7.700  
7.700  
7.682  
7.680  
7.600  
7.580  
7.568  
7.563  
7.549  
7.544  
7.539  
7.490  
7.478  
7.468  
7.458  
7.443  
7.439  
7.423  
7.260  
7.156  
7.151  
7.135  
7.130  
7.114  
7.109

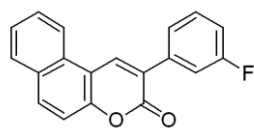

7e

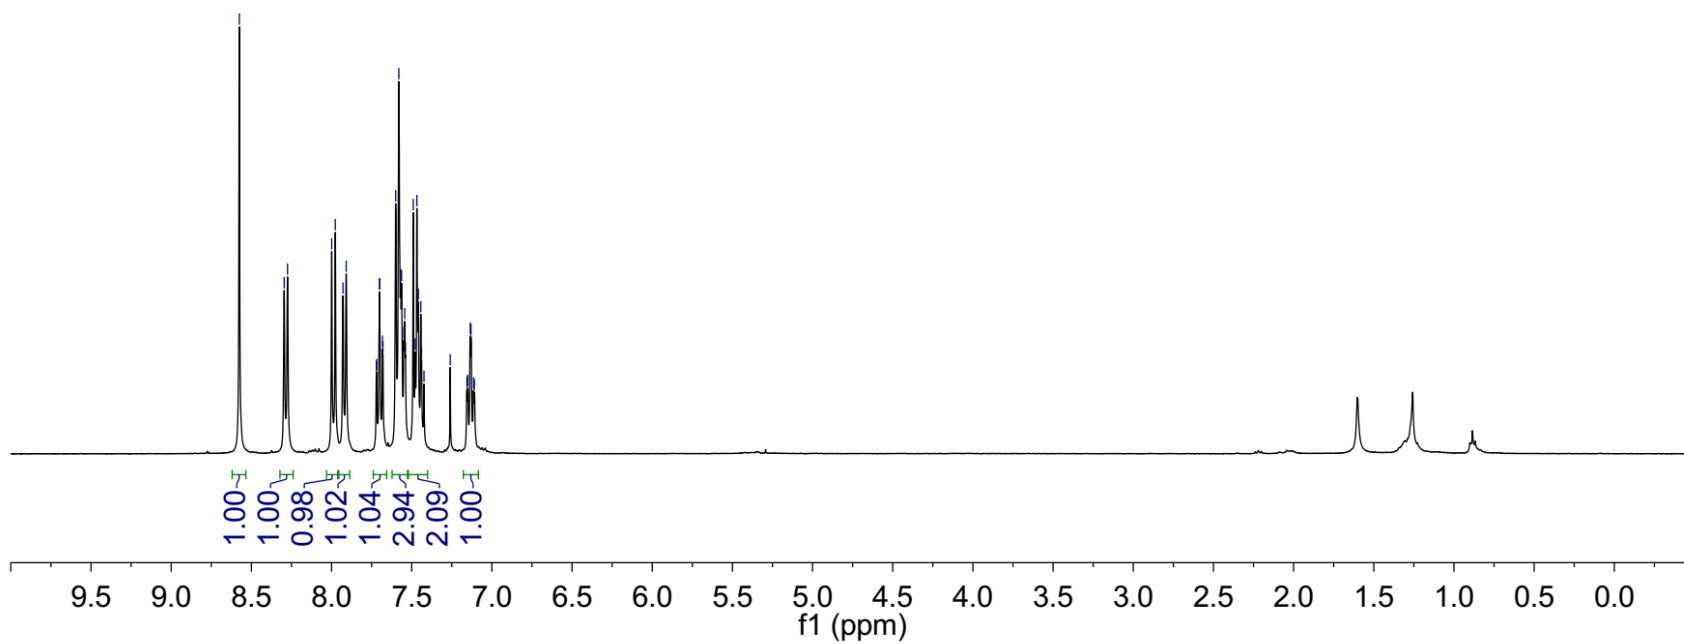

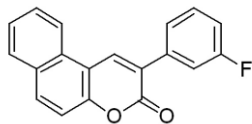

7e

163.915  
161.469  
160.213  
153.308  
136.148  
133.146  
130.069  
129.985  
129.119  
128.328  
126.132  
124.190  
124.164  
121.334  
116.607  
115.839  
115.772  
115.629  
115.544  
77.318  
77.000  
76.682

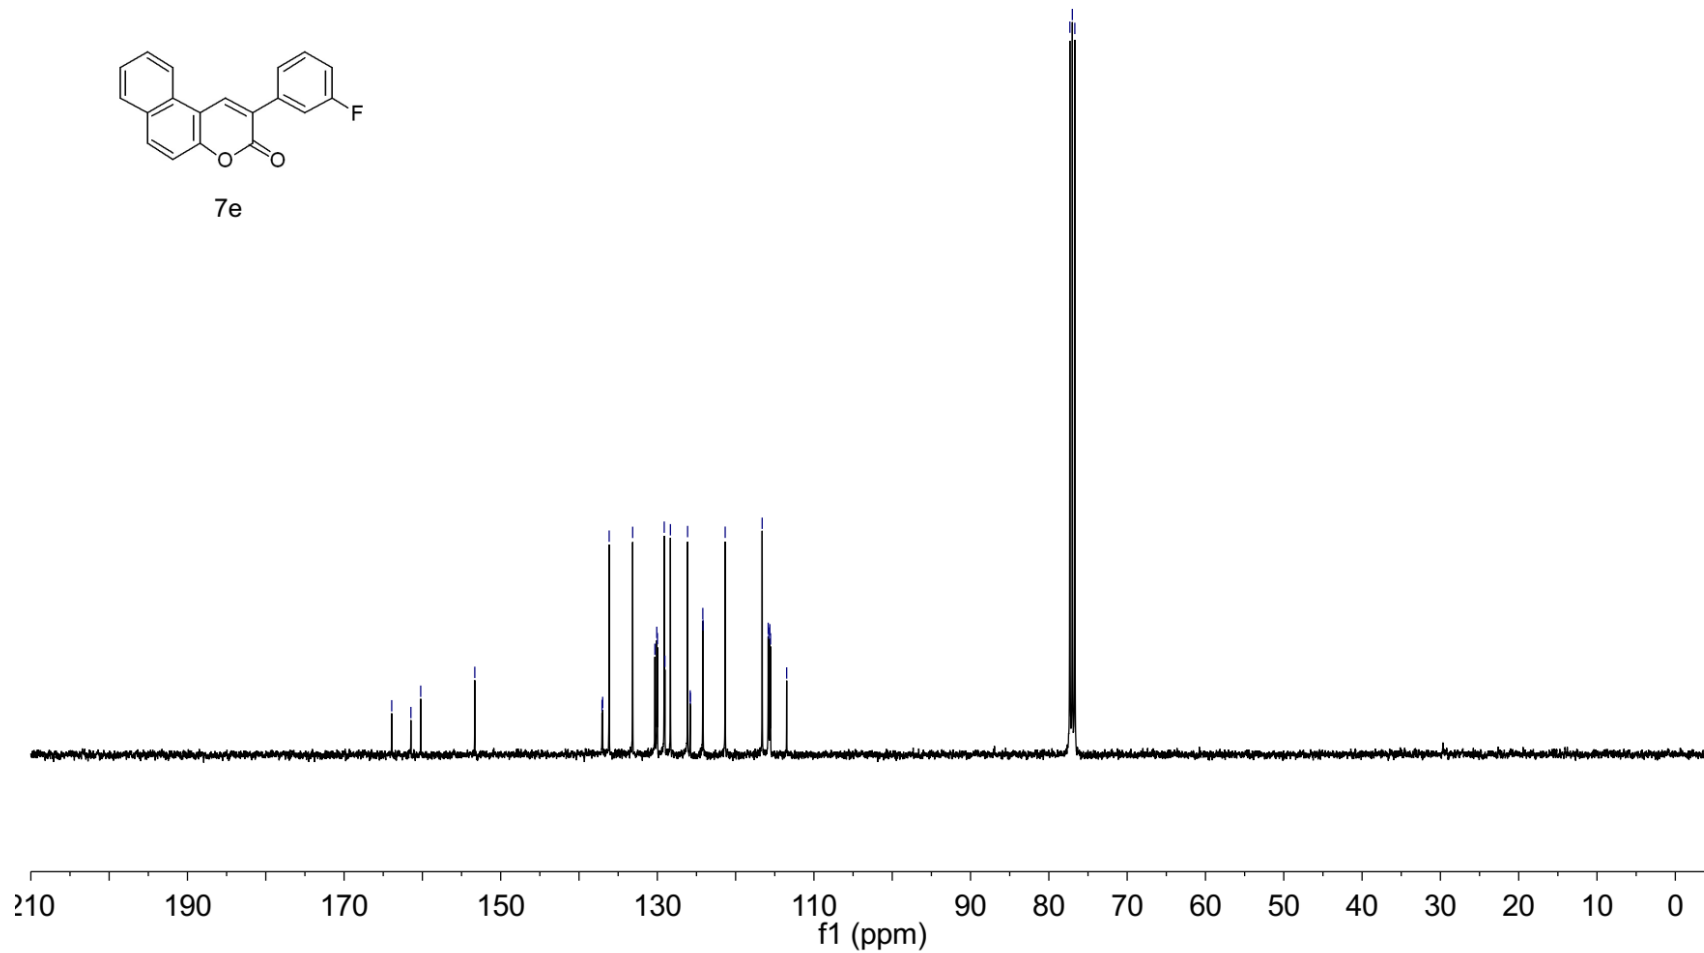

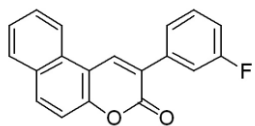

7e

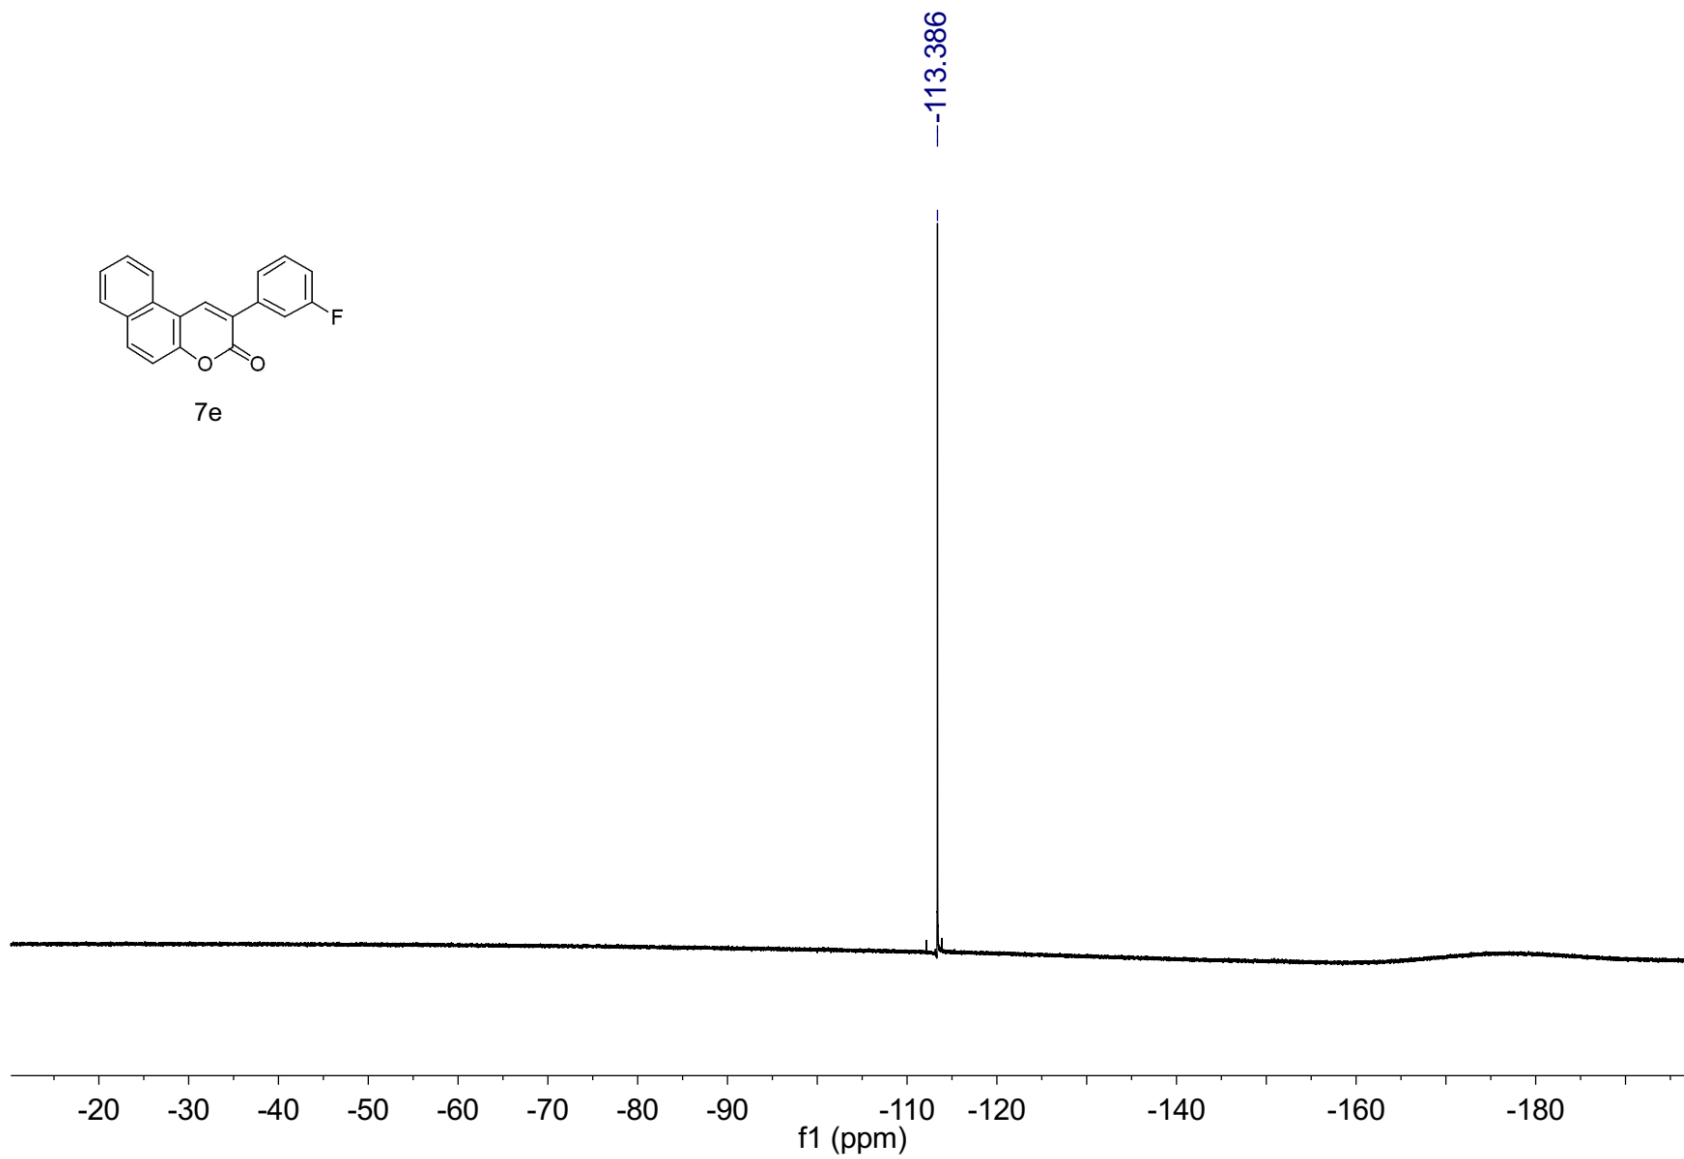

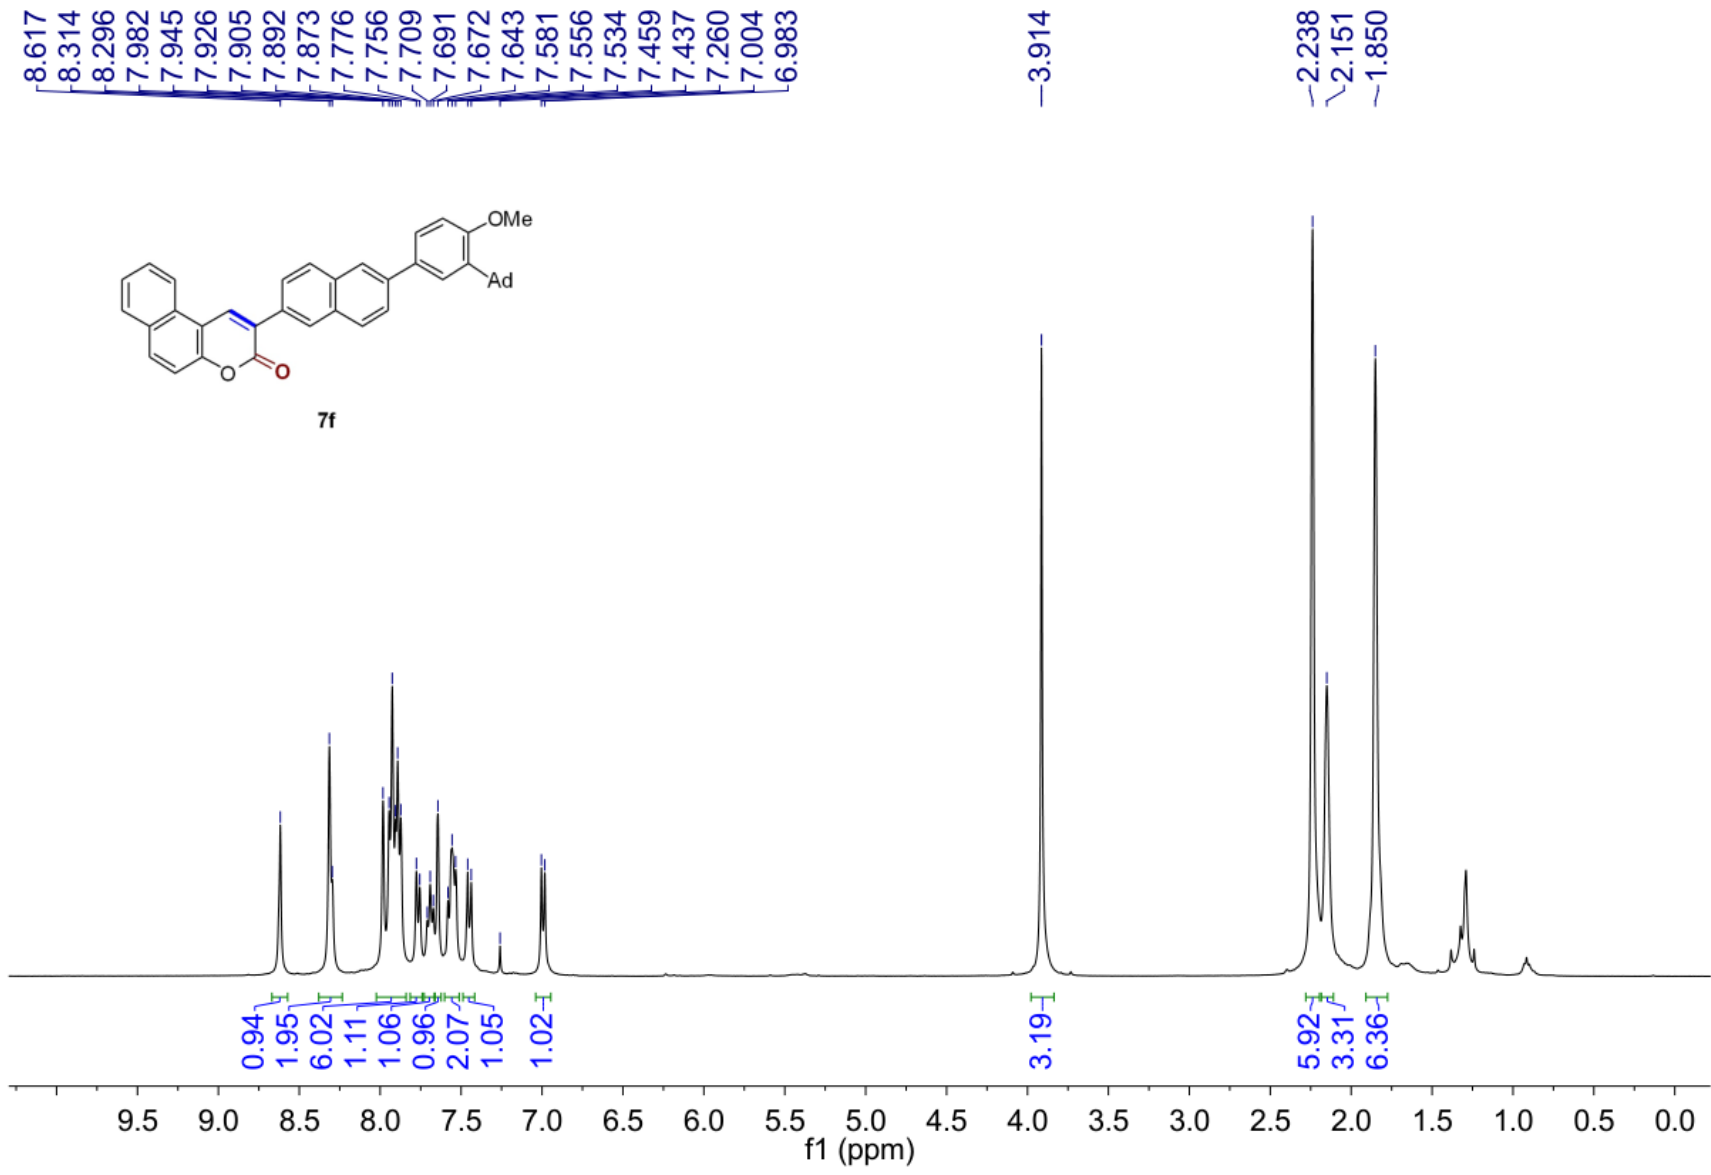

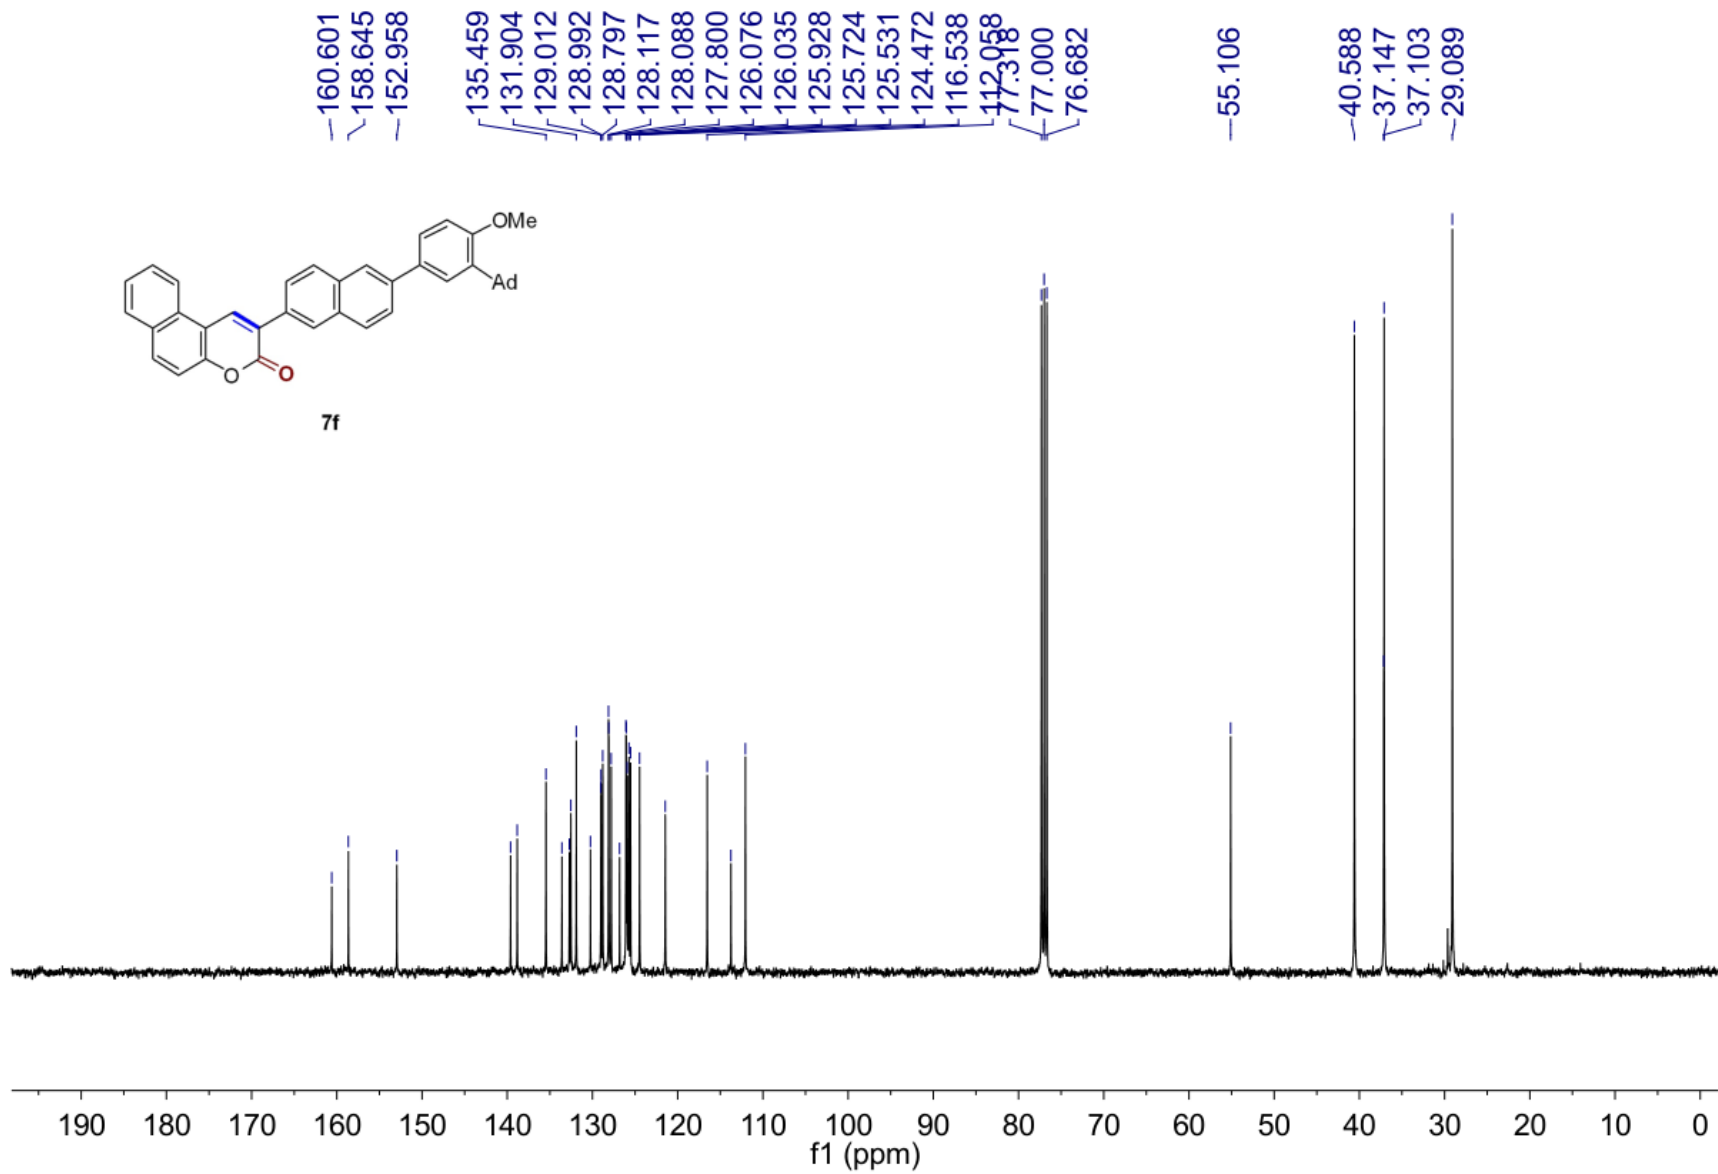



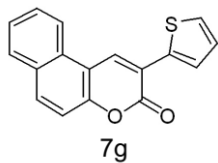

8.754  
8.337  
8.316  
7.974  
7.951  
7.927  
7.917  
7.914  
7.907  
7.905  
7.739  
7.736  
7.722  
7.719  
7.715  
7.701  
7.698  
7.604  
7.602  
7.587  
7.584  
7.582  
7.567  
7.564  
7.500  
7.477  
7.474  
7.471  
7.461  
7.459  
7.260  
7.187  
7.178  
7.175  
7.165

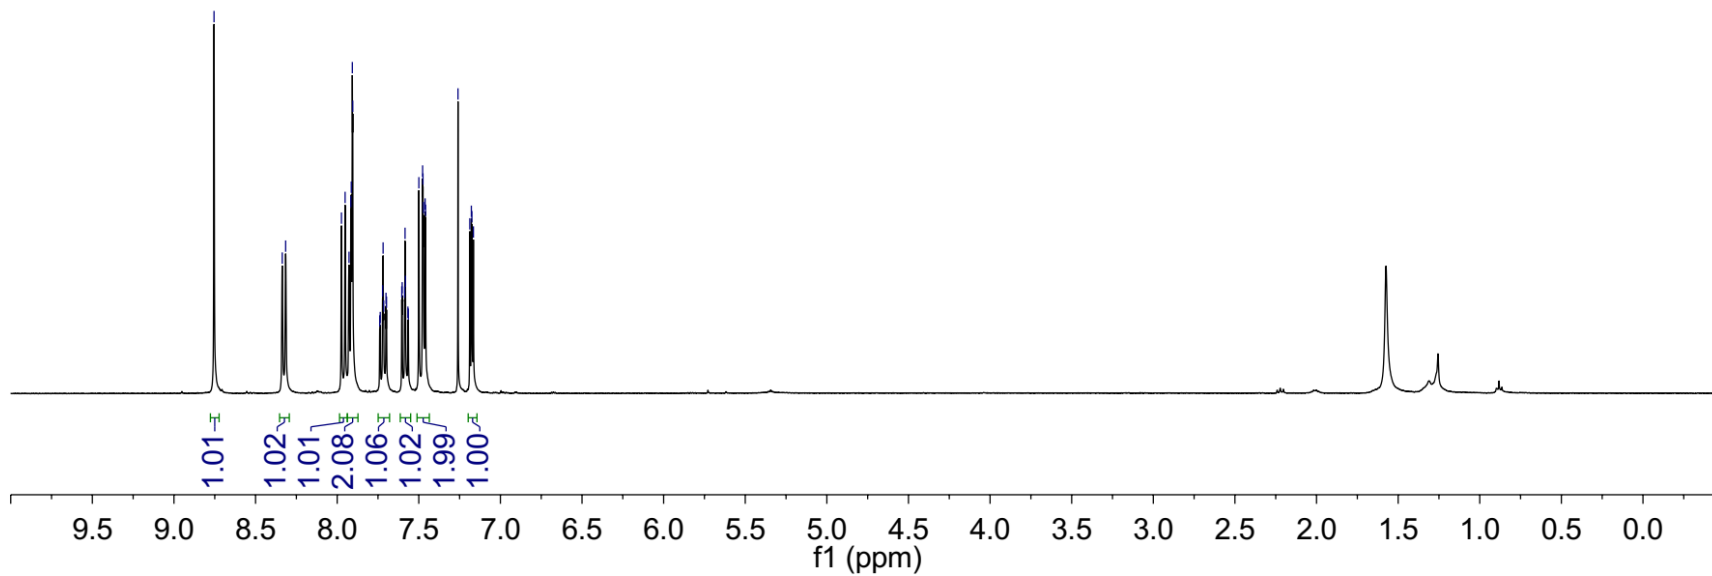

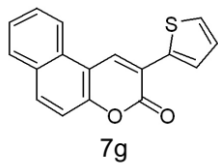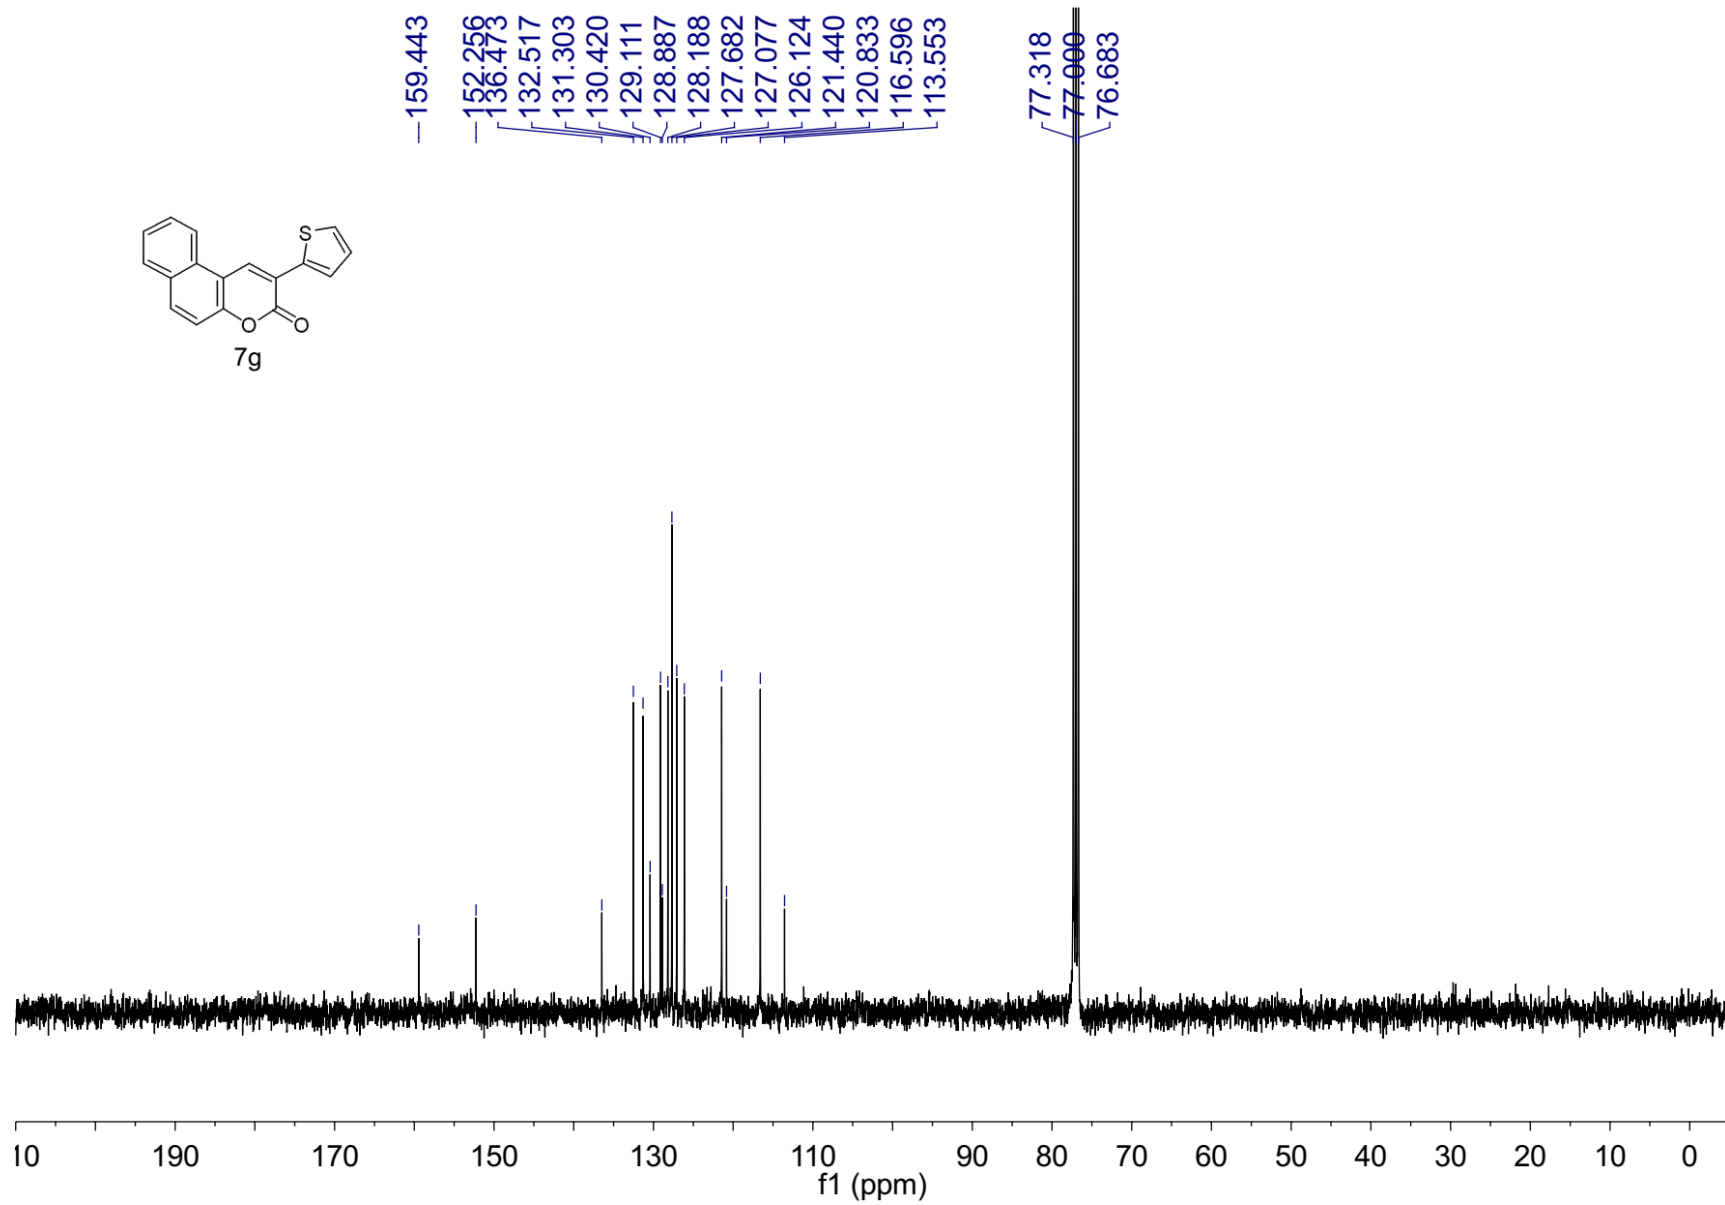

8.621  
8.266  
8.266  
8.245  
8.245  
7.926  
7.904  
7.886  
7.866  
7.694  
7.676  
7.658  
7.629  
7.627  
7.616  
7.614  
7.565  
7.547  
7.528  
7.444  
7.444  
7.438  
7.438  
7.430  
7.430  
7.422  
7.422  
7.260

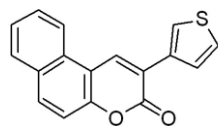

7h

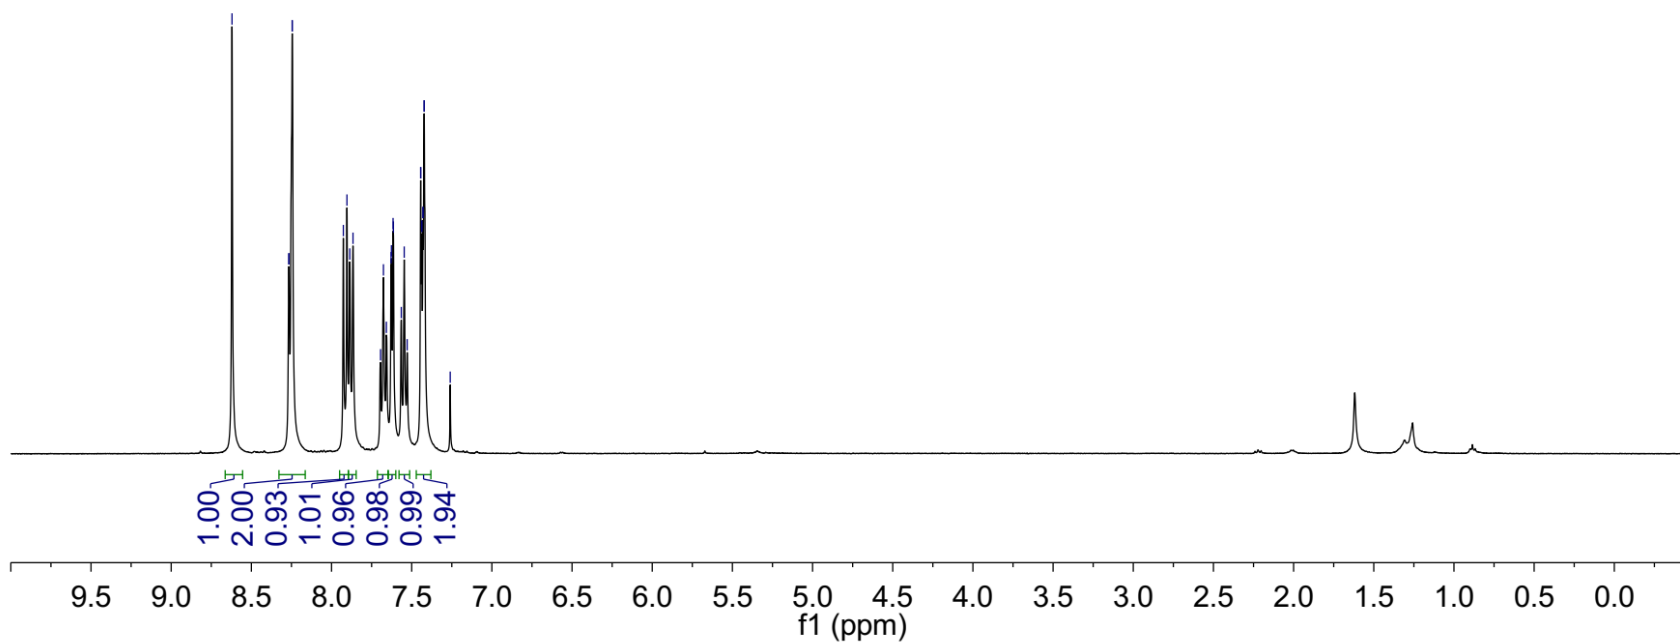

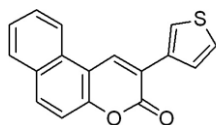

7h

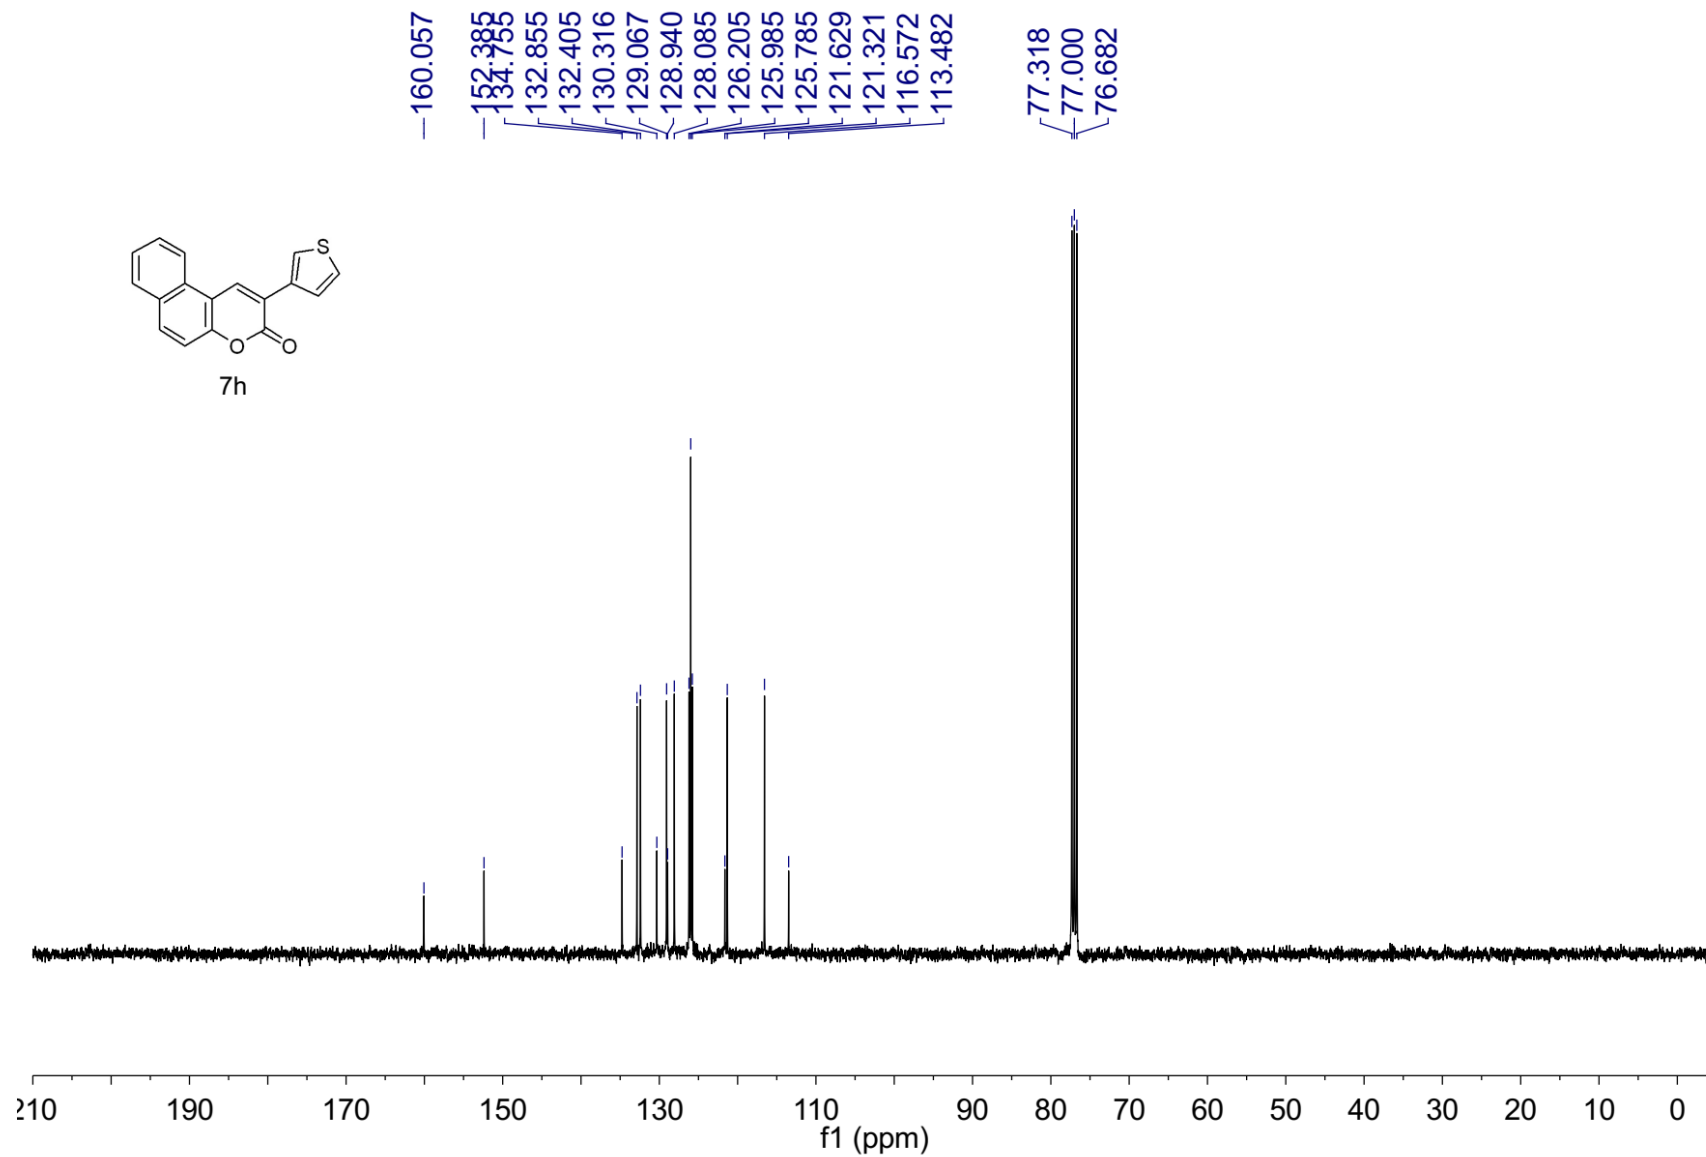

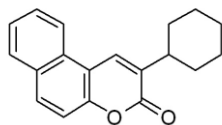

7i

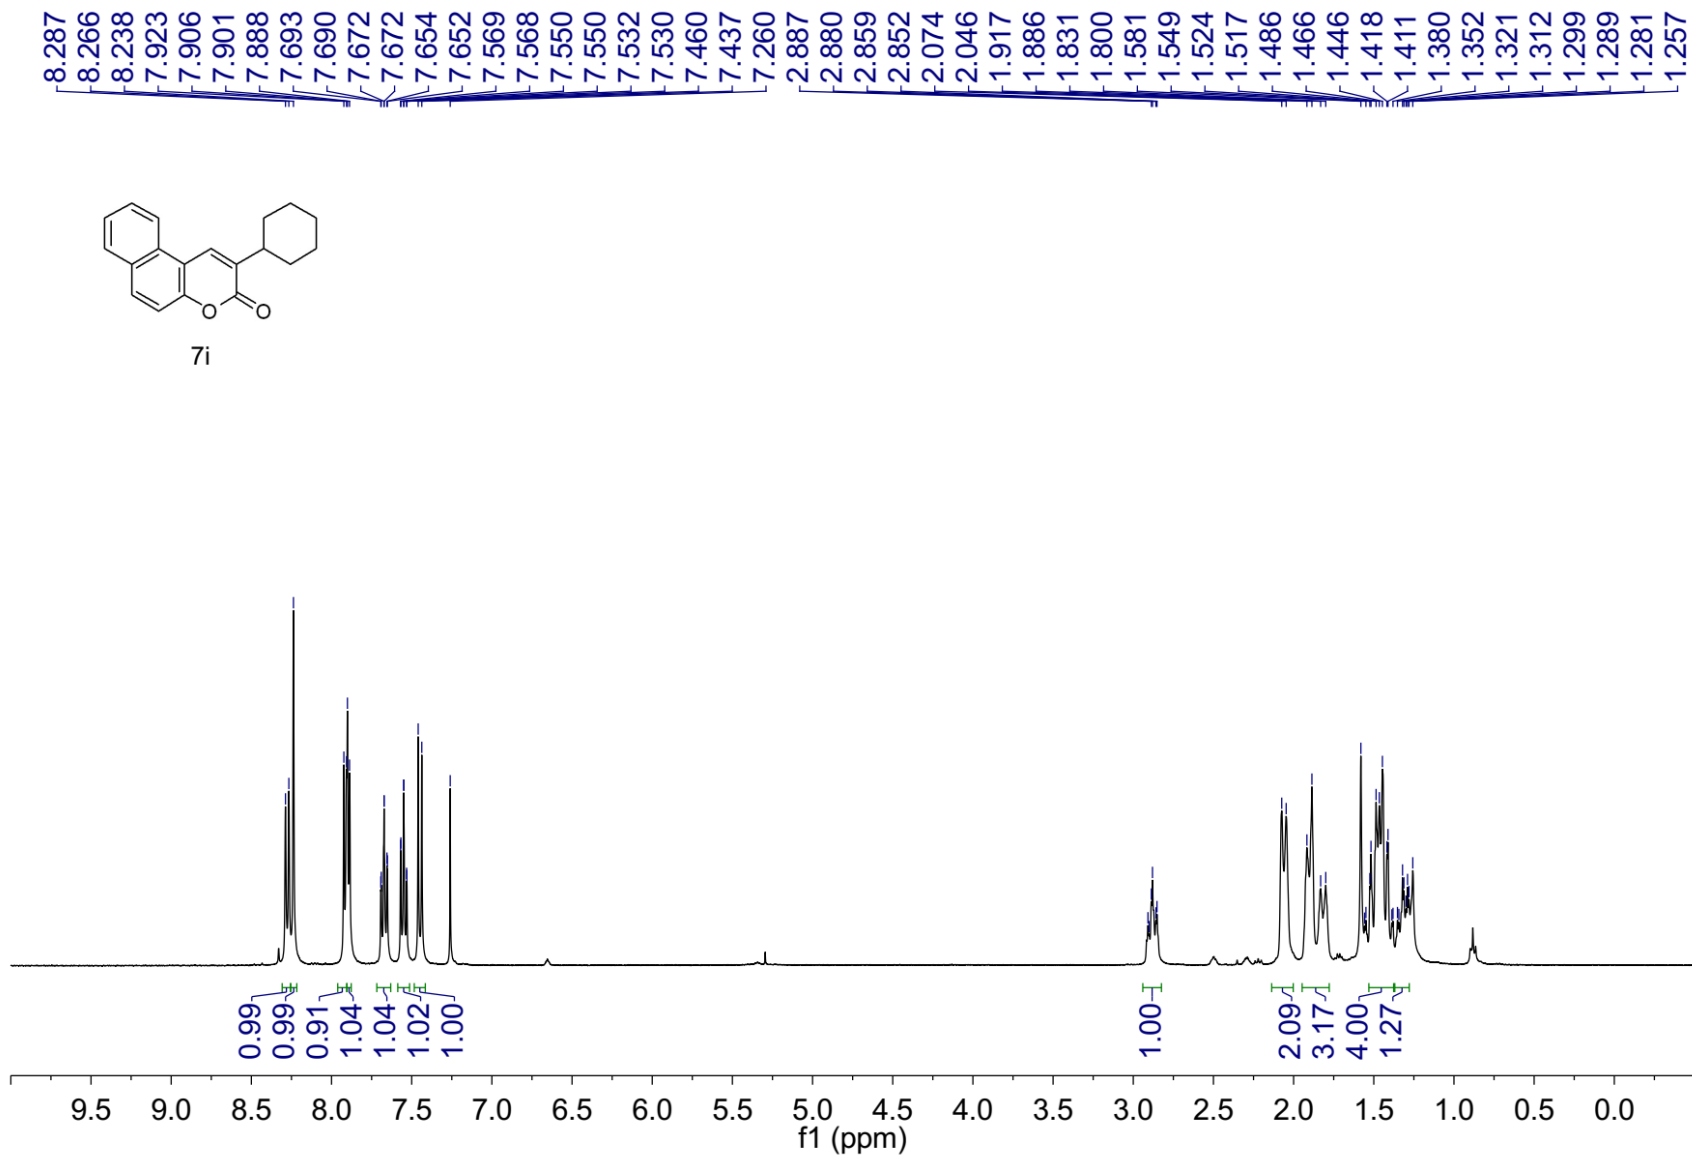

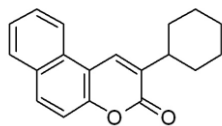

7i

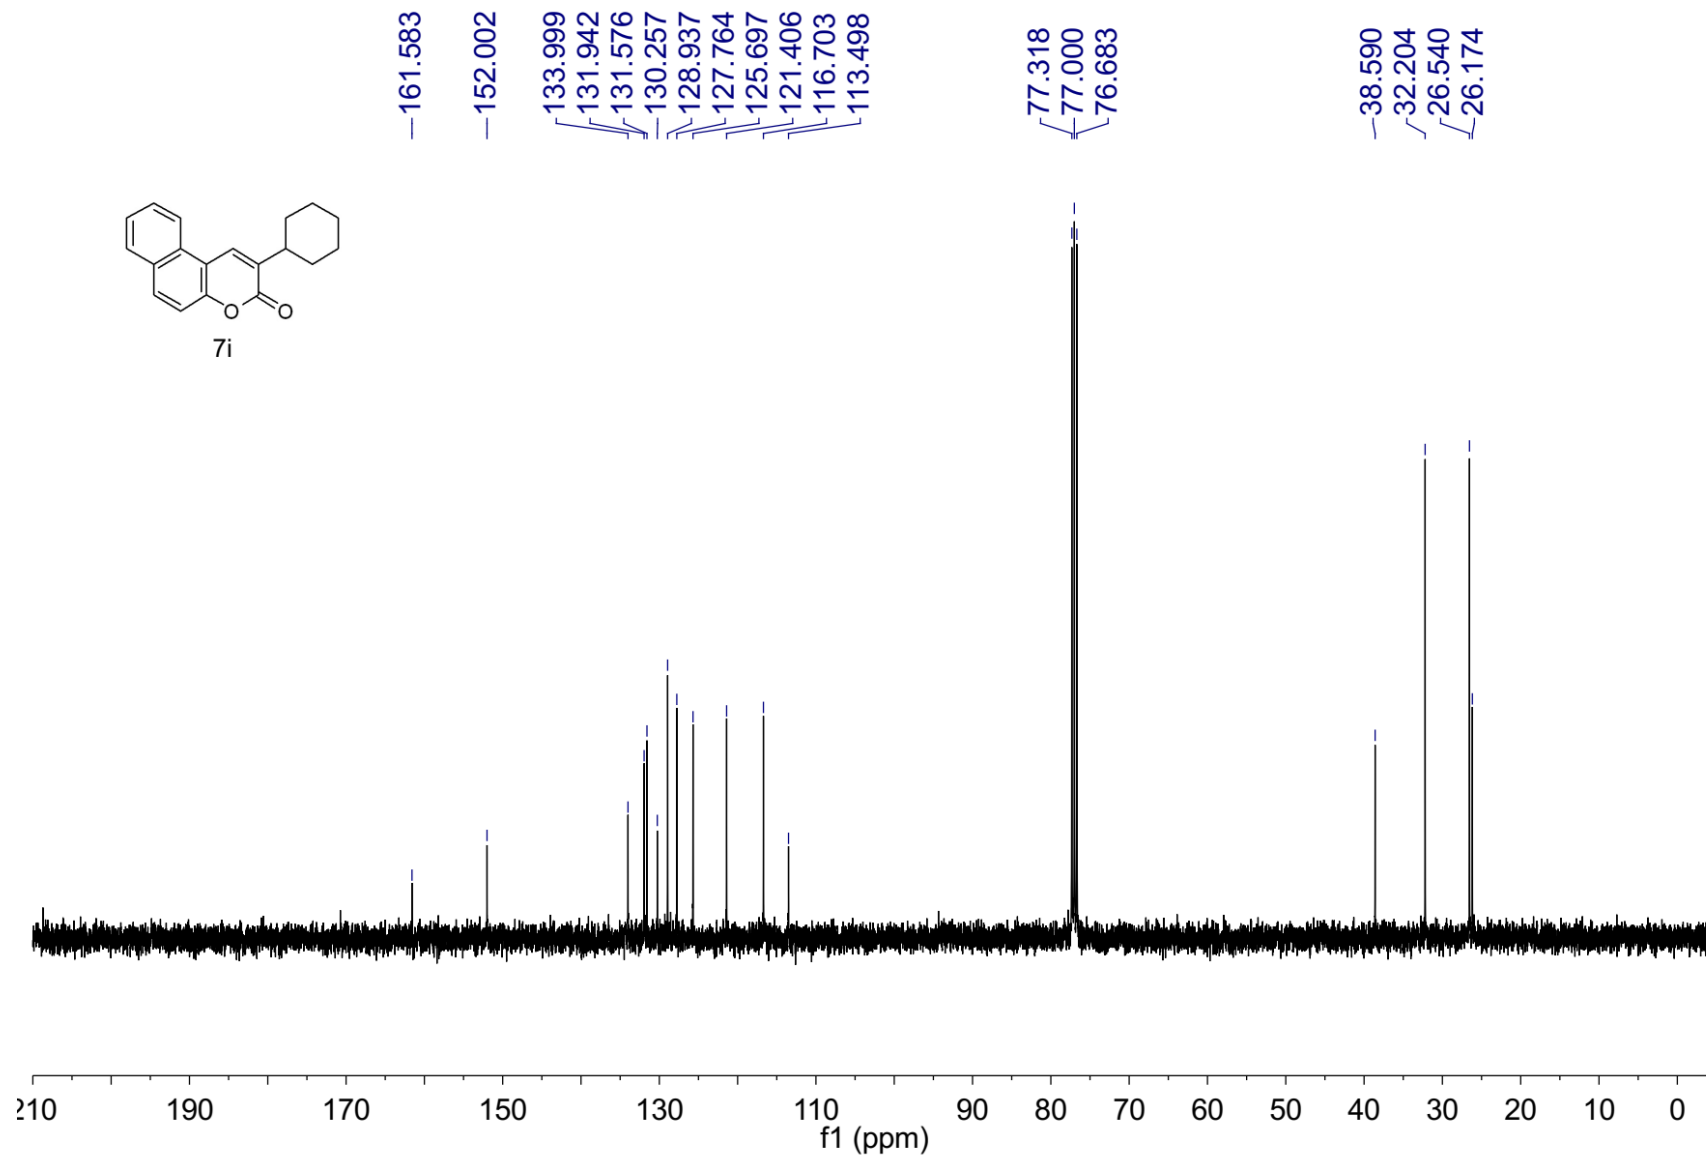

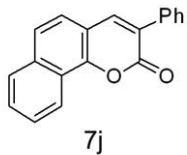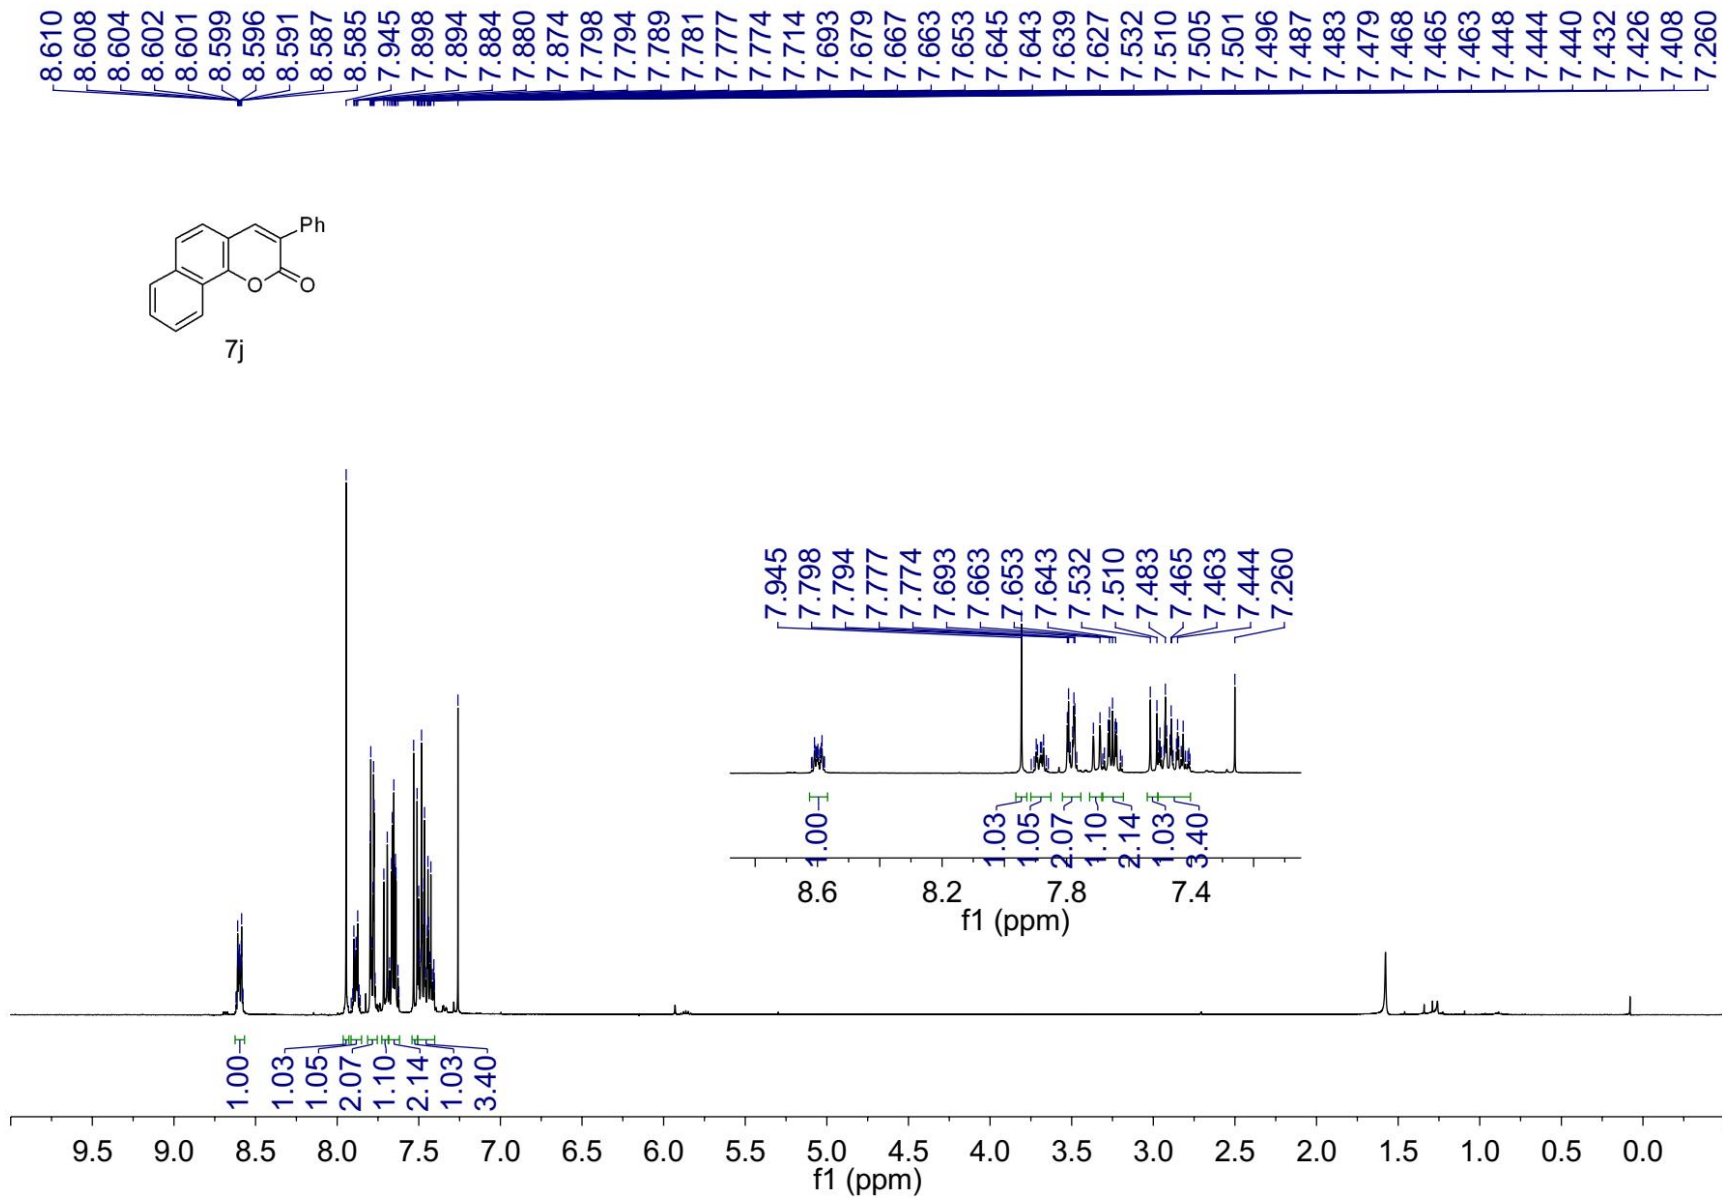

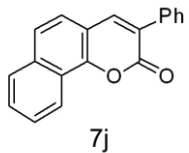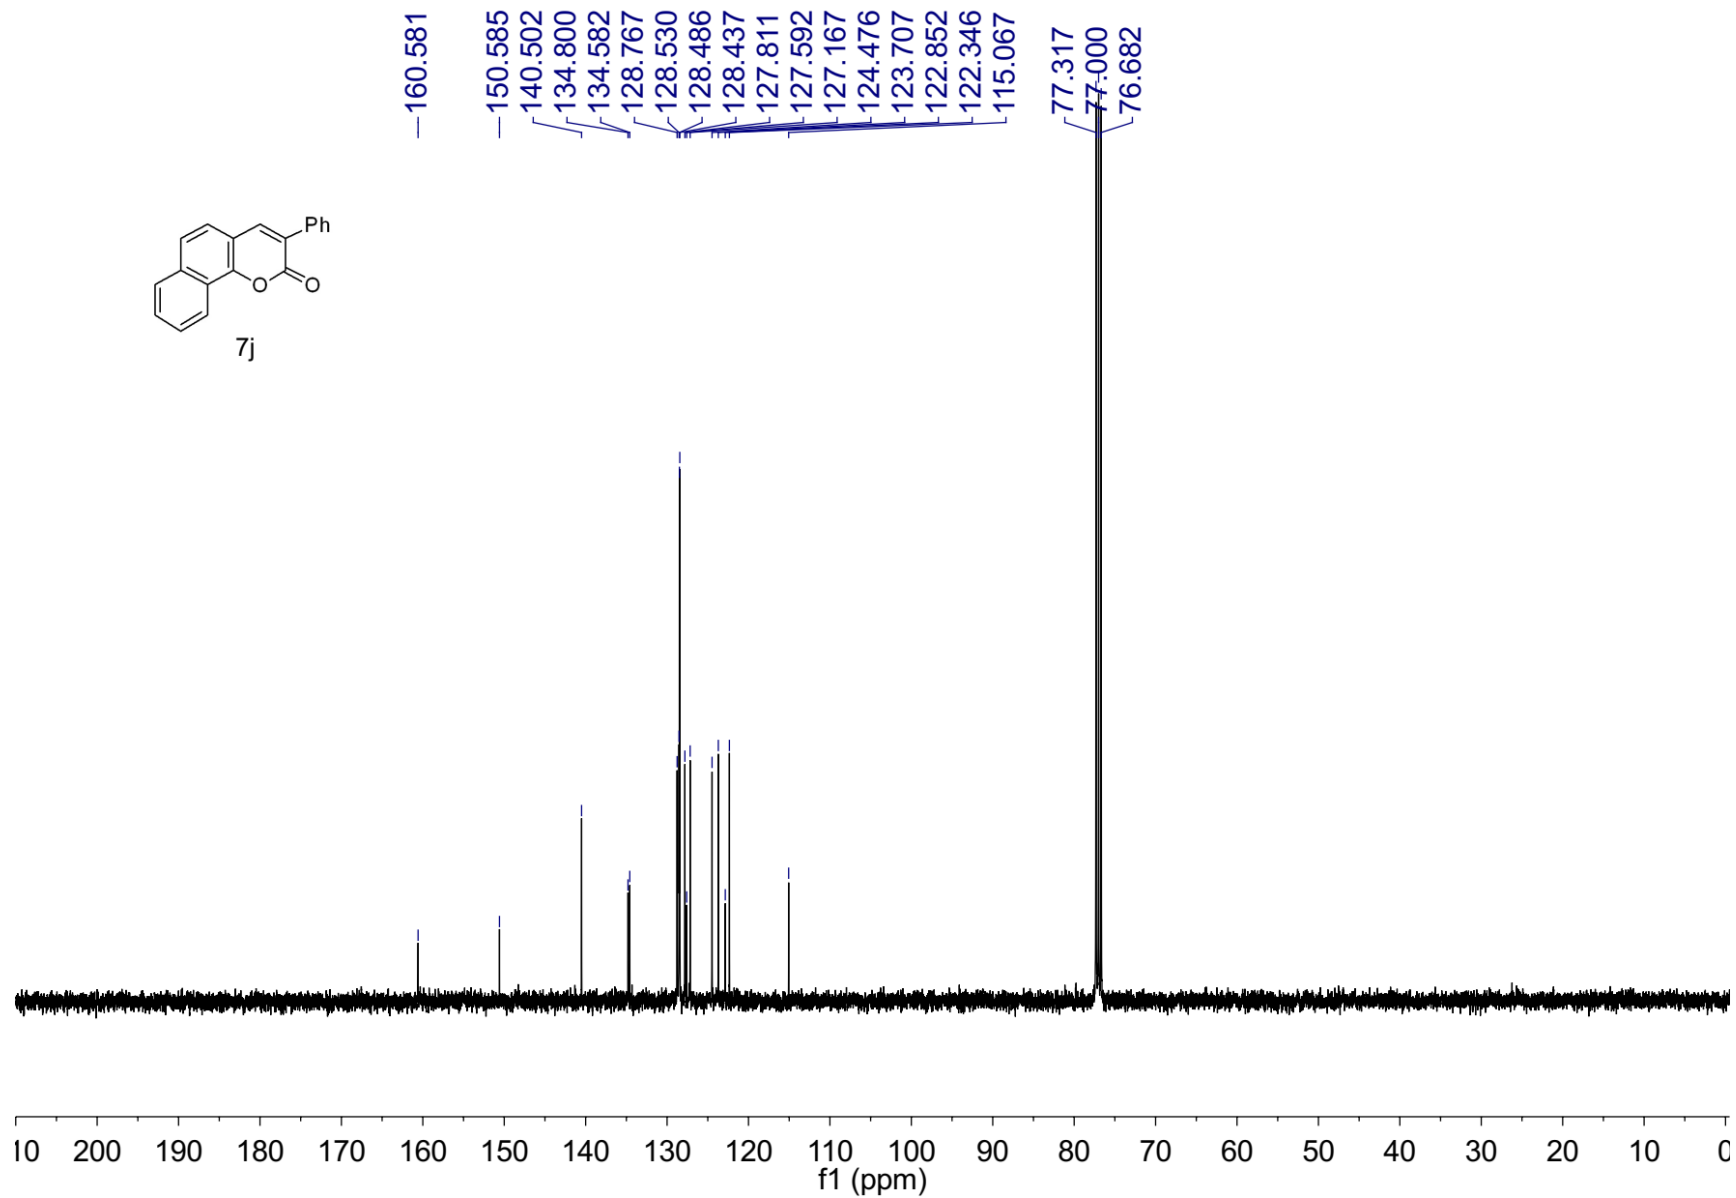



8.991  
8.987  
8.980  
8.976  
8.623  
8.602  
8.473  
8.256  
8.233  
7.791  
7.787  
7.781  
7.774  
7.770  
7.767  
7.760  
7.728  
7.705  
7.608  
7.598  
7.587  
7.576  
7.503  
7.498  
7.493  
7.481  
7.477  
7.466  
7.463  
7.454  
7.451  
7.447  
7.440  
7.433  
7.424  
7.418  
7.415  
7.412  
7.260

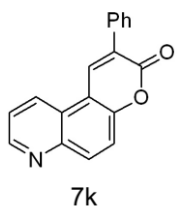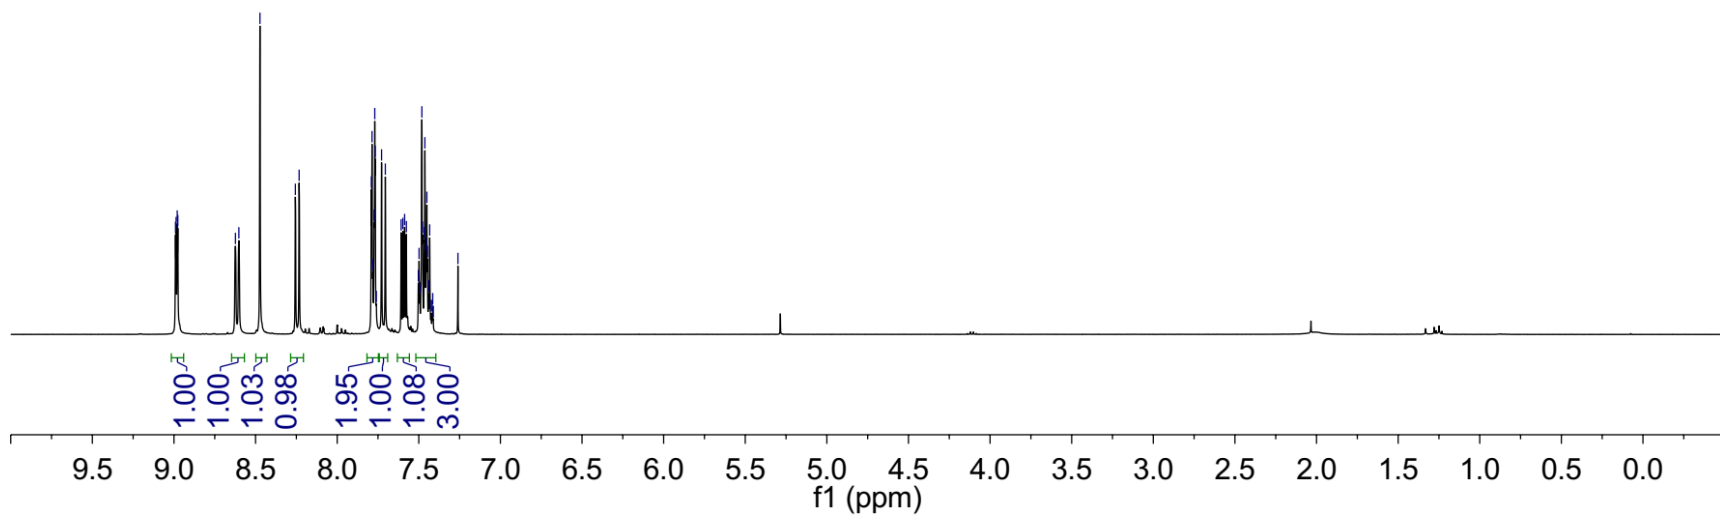

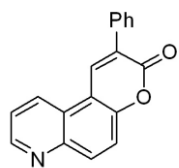

7k

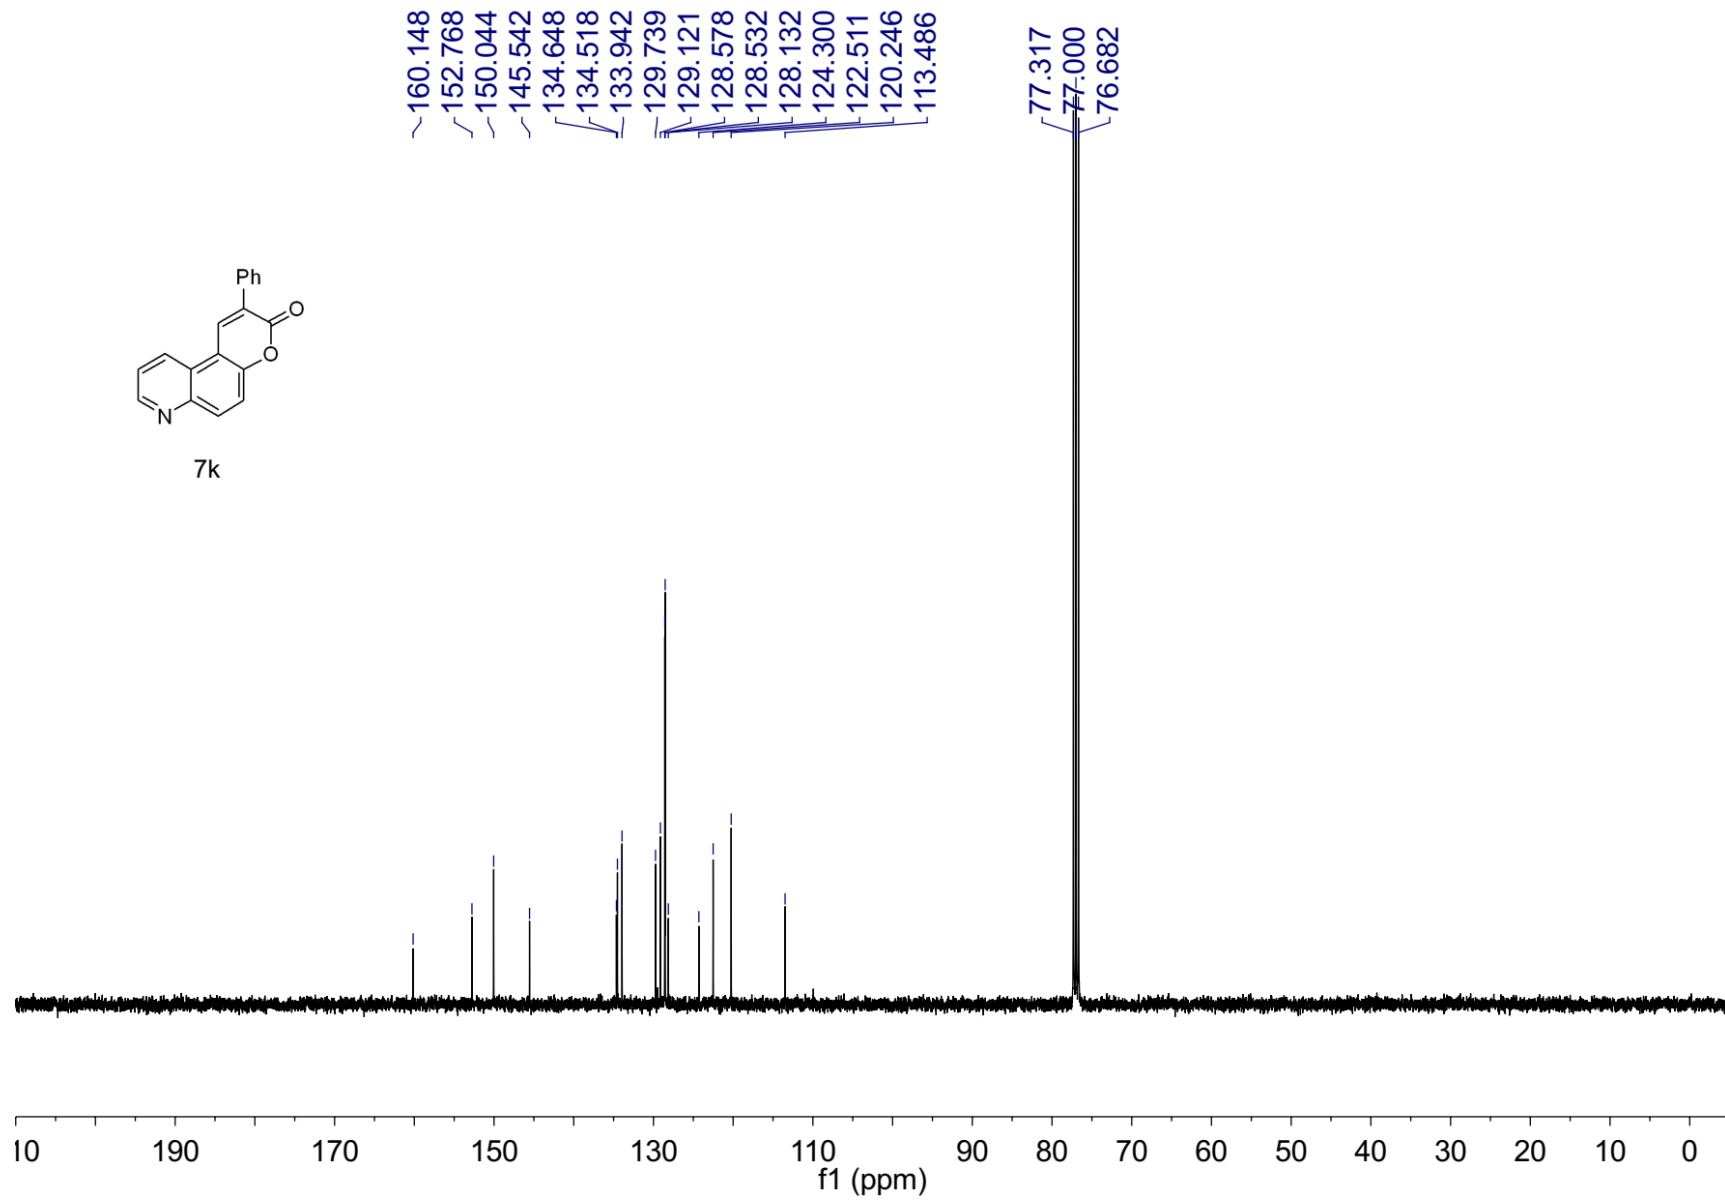

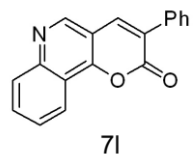

9.004  
8.495  
8.475  
8.153  
8.132  
7.993  
7.863  
7.846  
7.827  
7.768  
7.751  
7.718  
7.700  
7.682  
7.485  
7.466  
7.443  
7.260

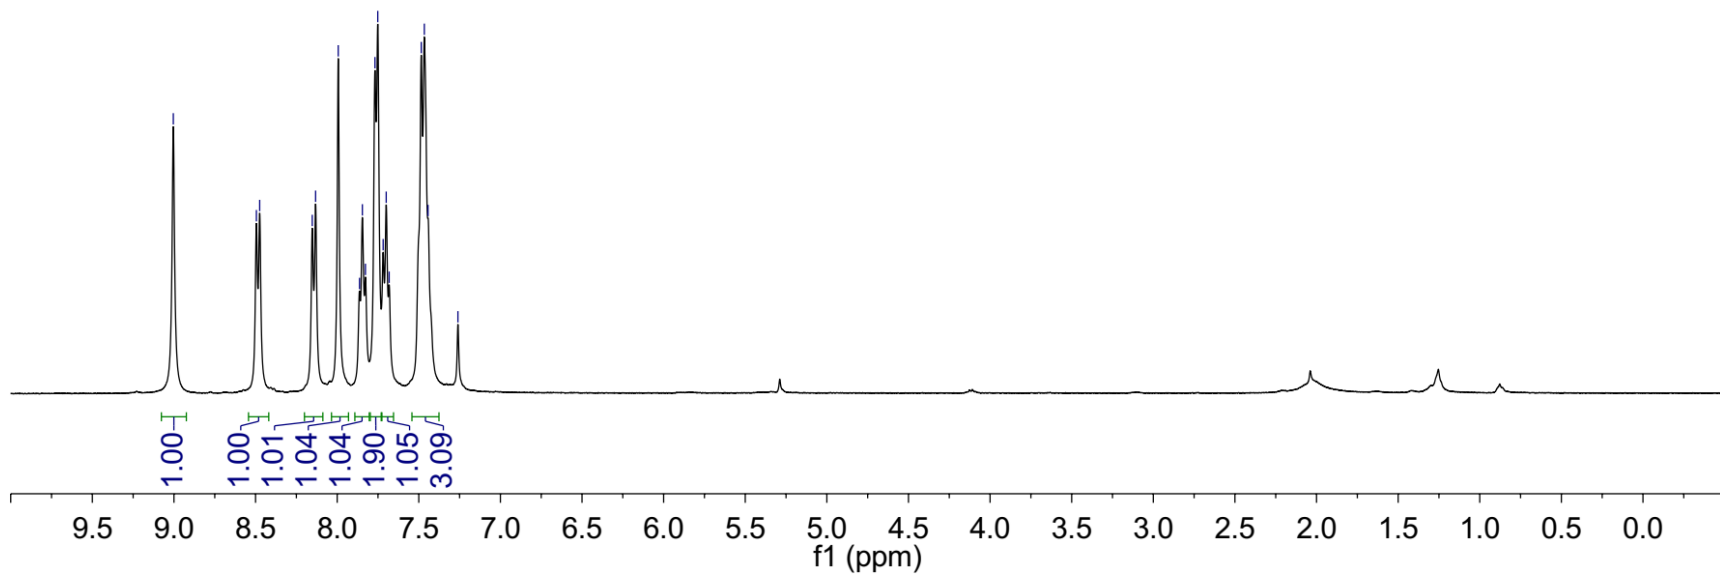

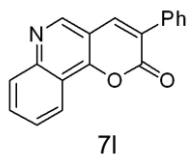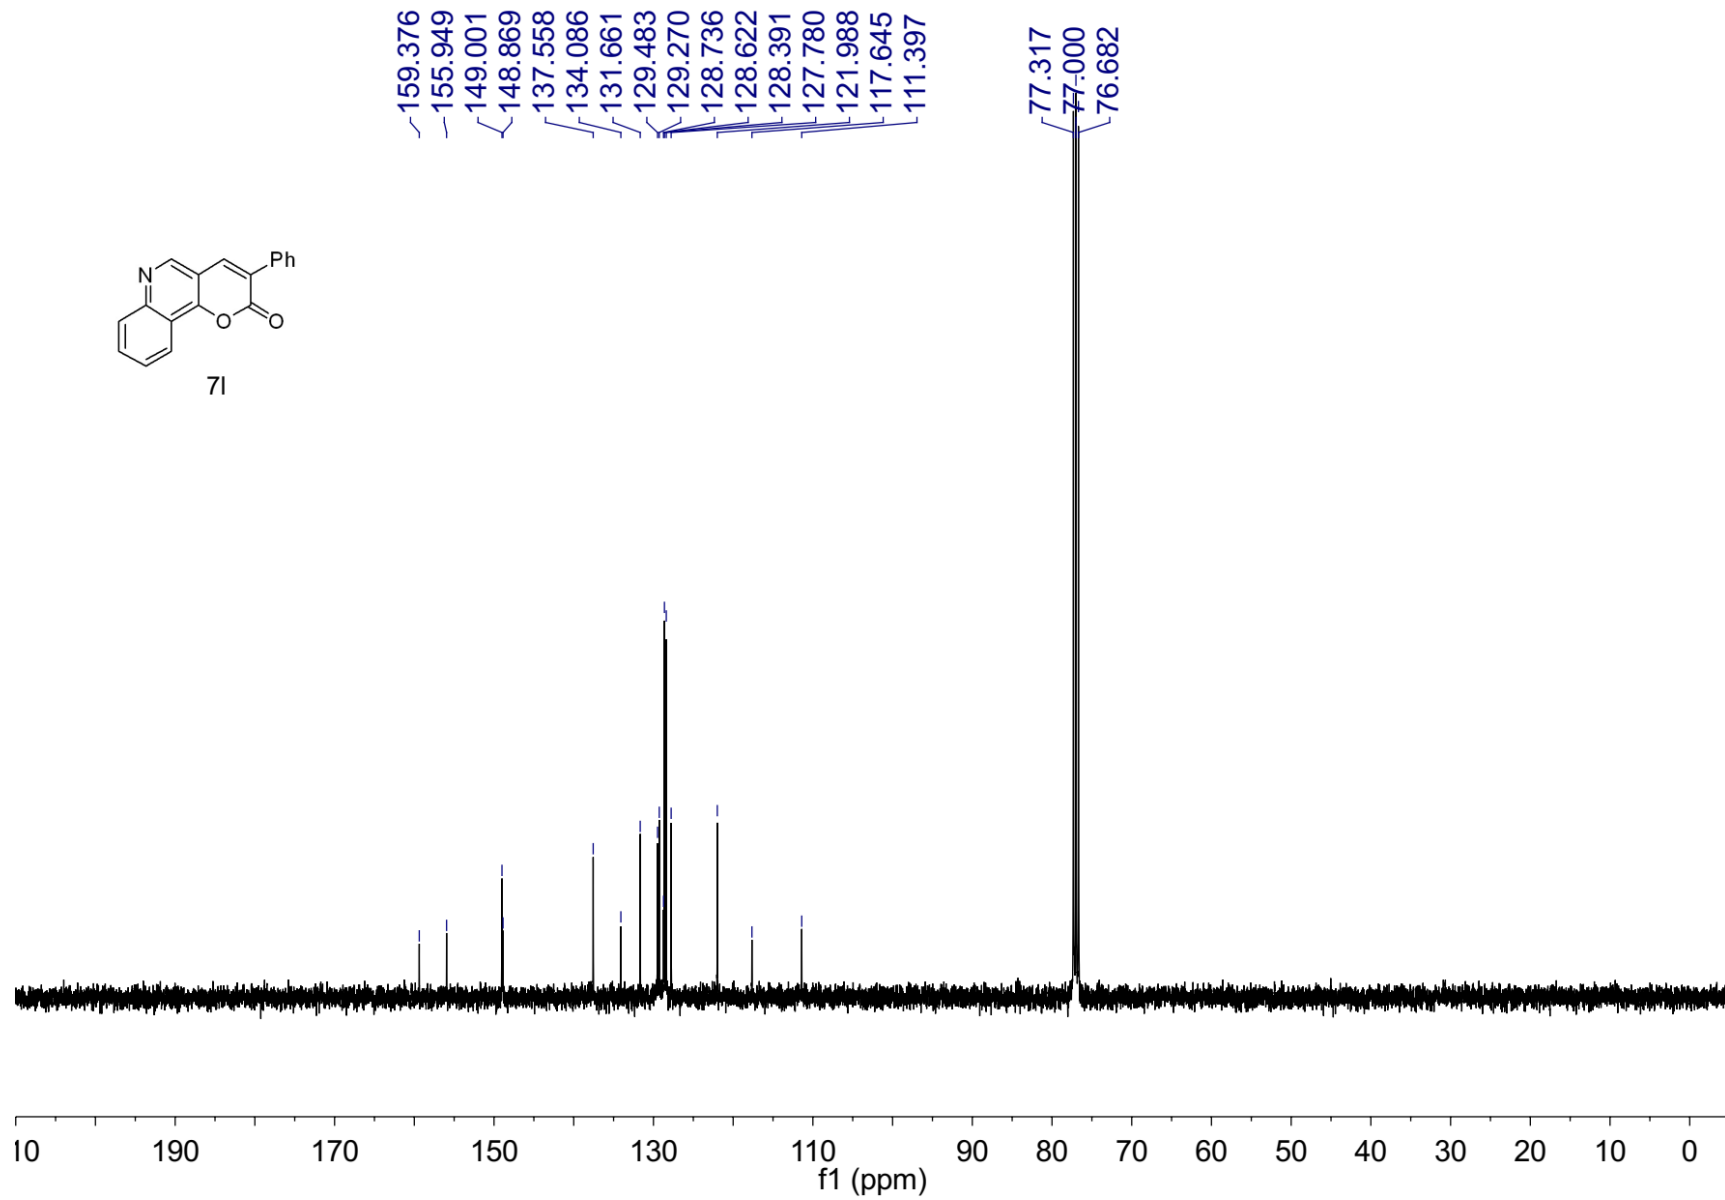

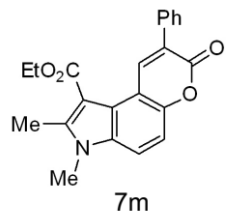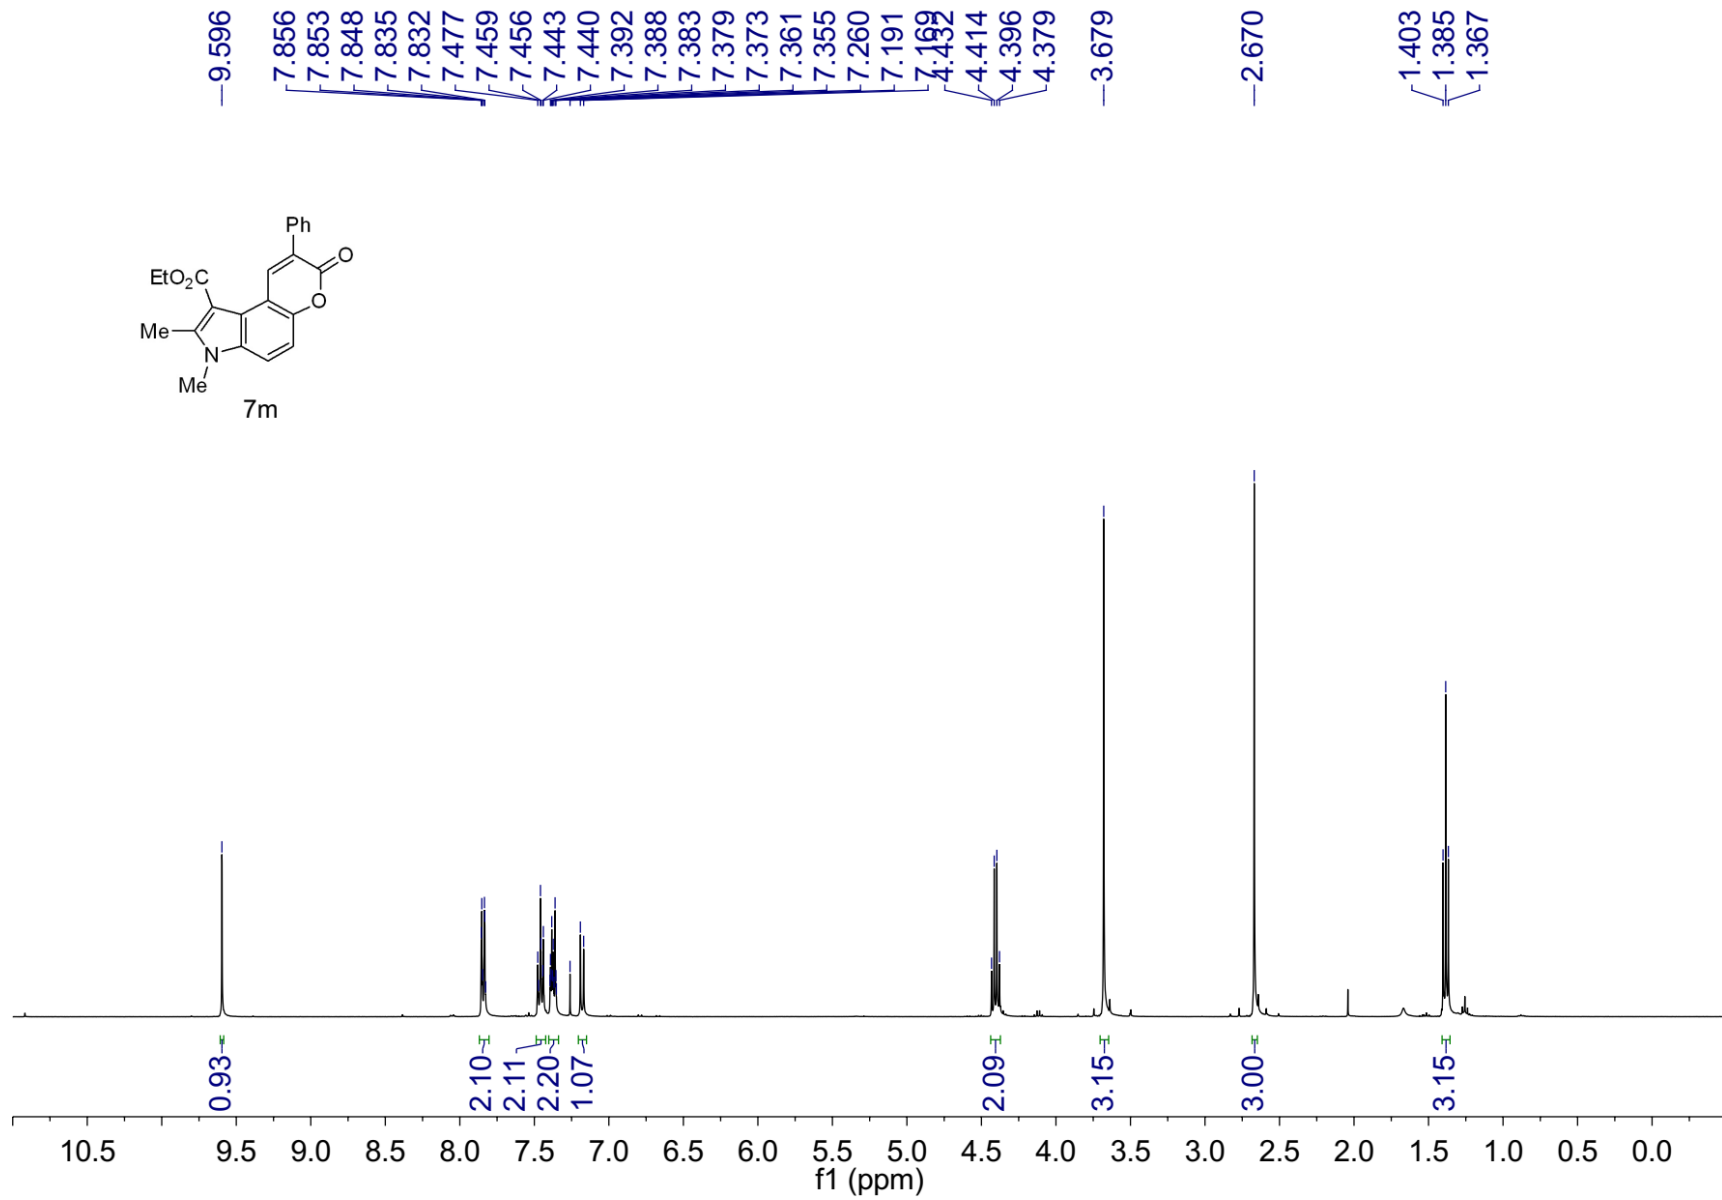

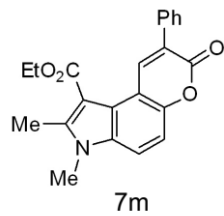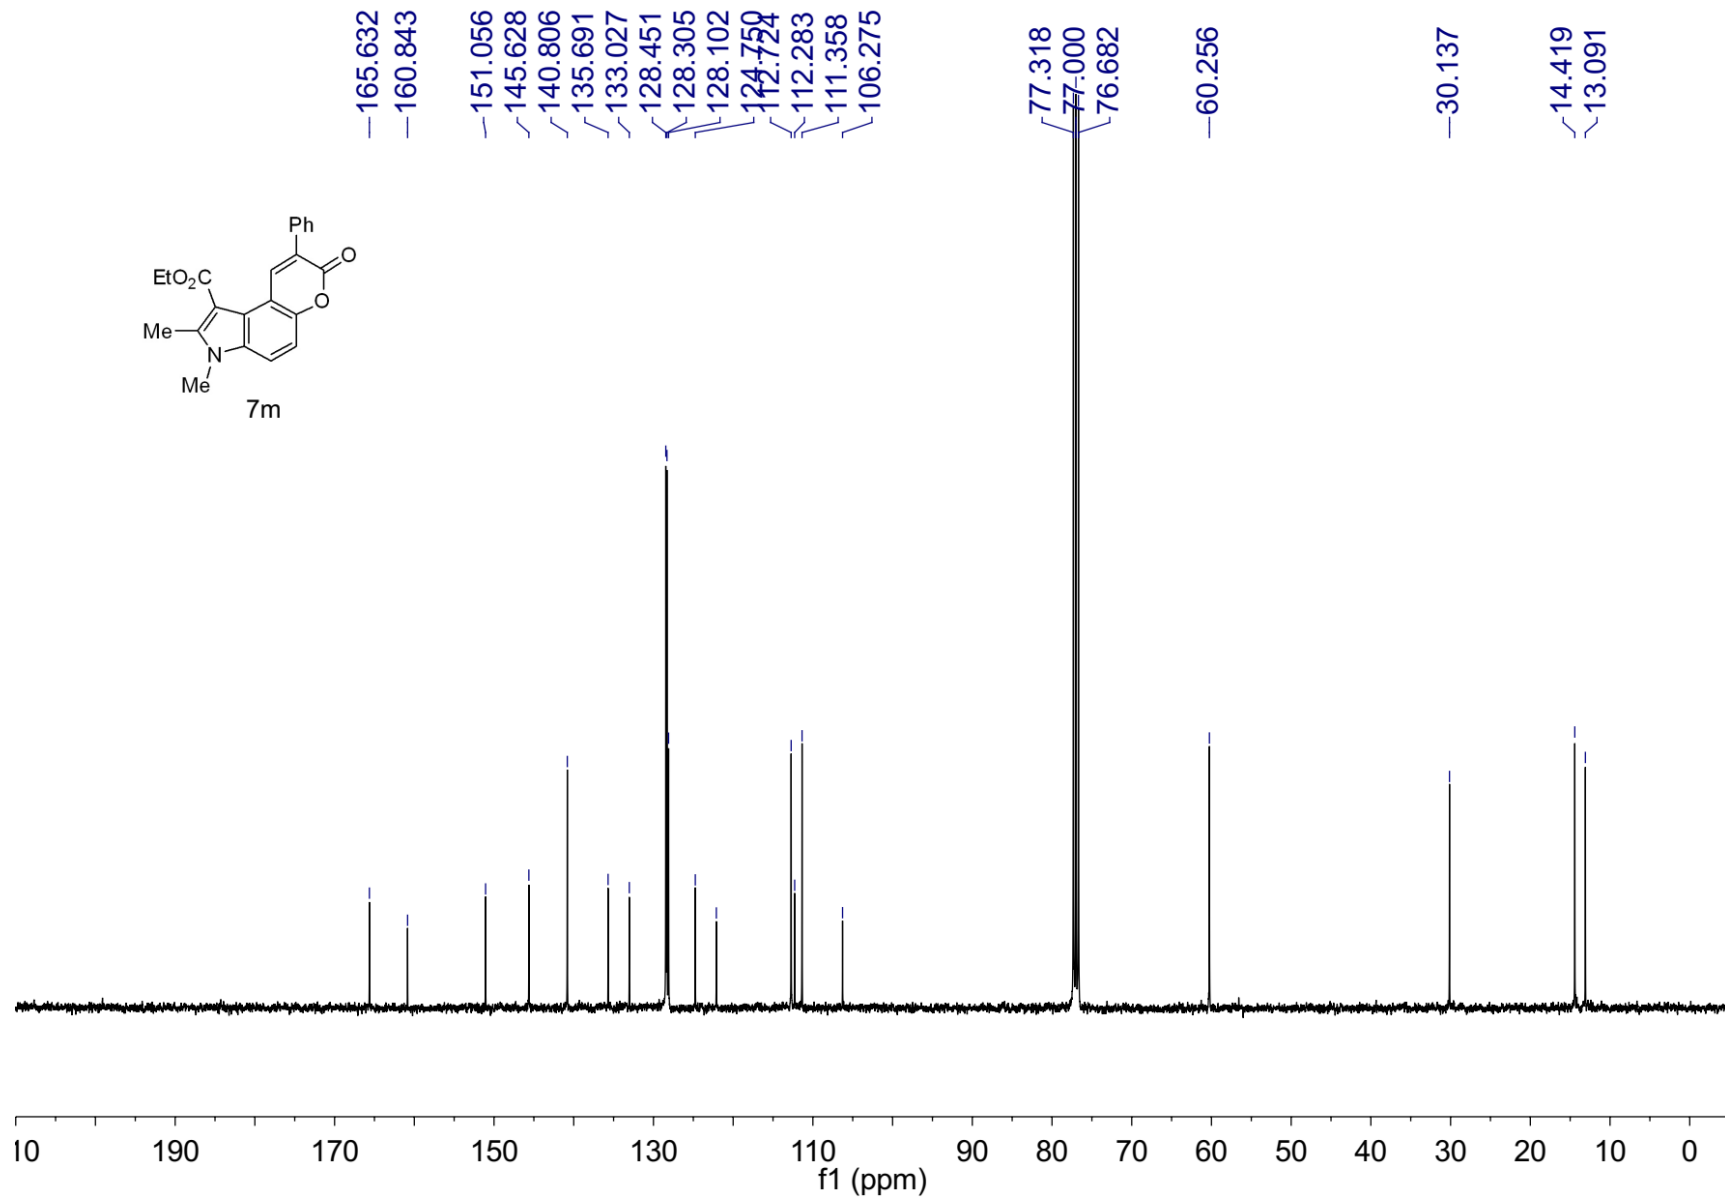

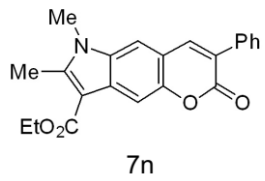

7.974  
7.781  
7.684  
7.665  
7.431  
7.413  
7.394  
7.377  
7.375  
7.359  
7.342  
7.260

4.411  
4.394  
4.376  
4.358  
— 3.697

— 2.745

1.481  
1.463  
1.445

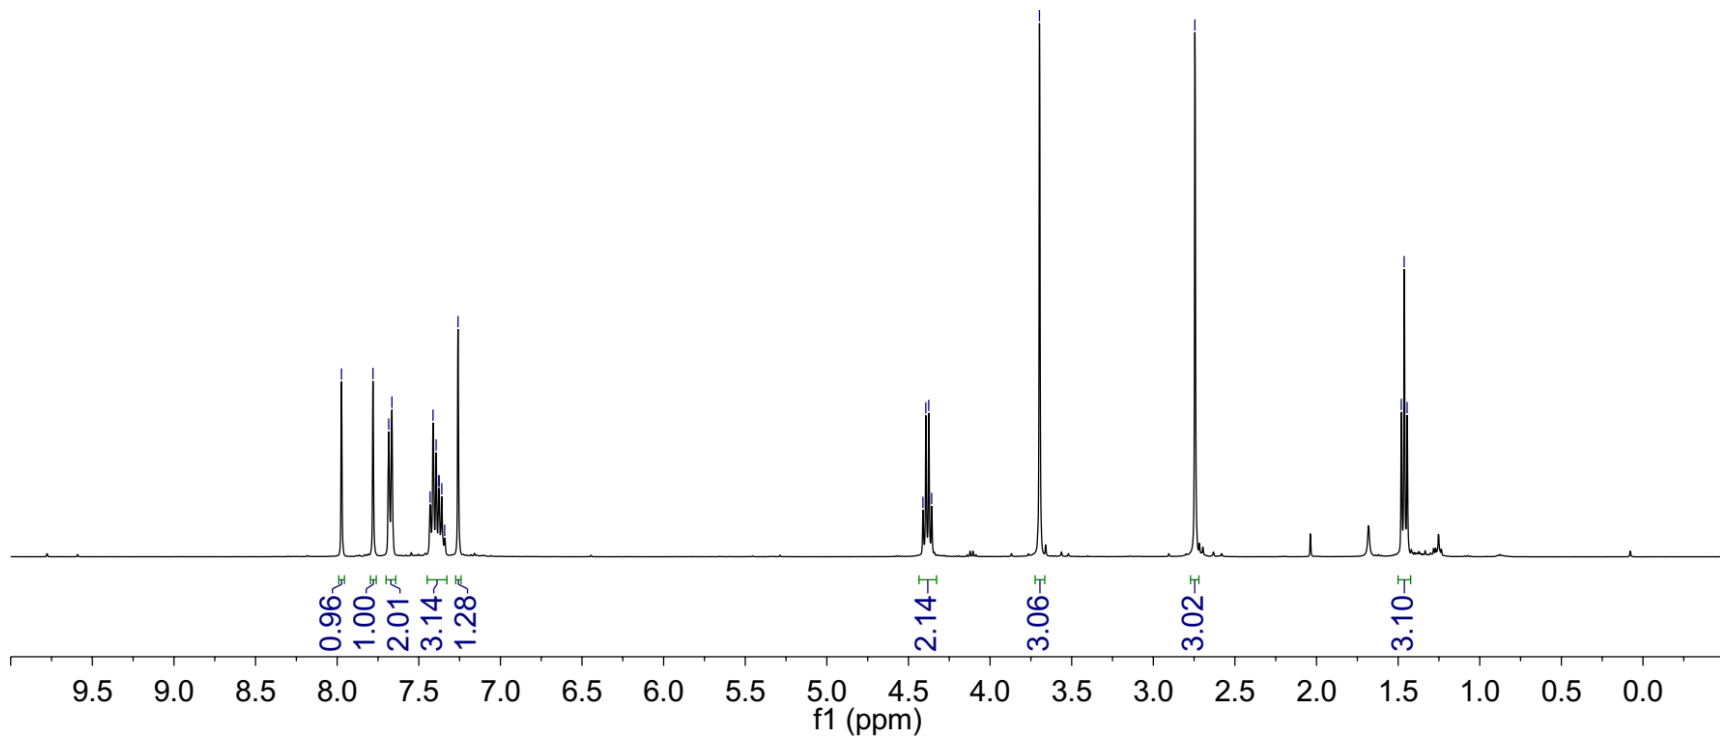

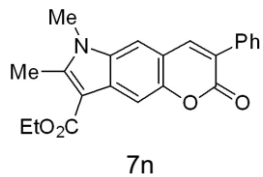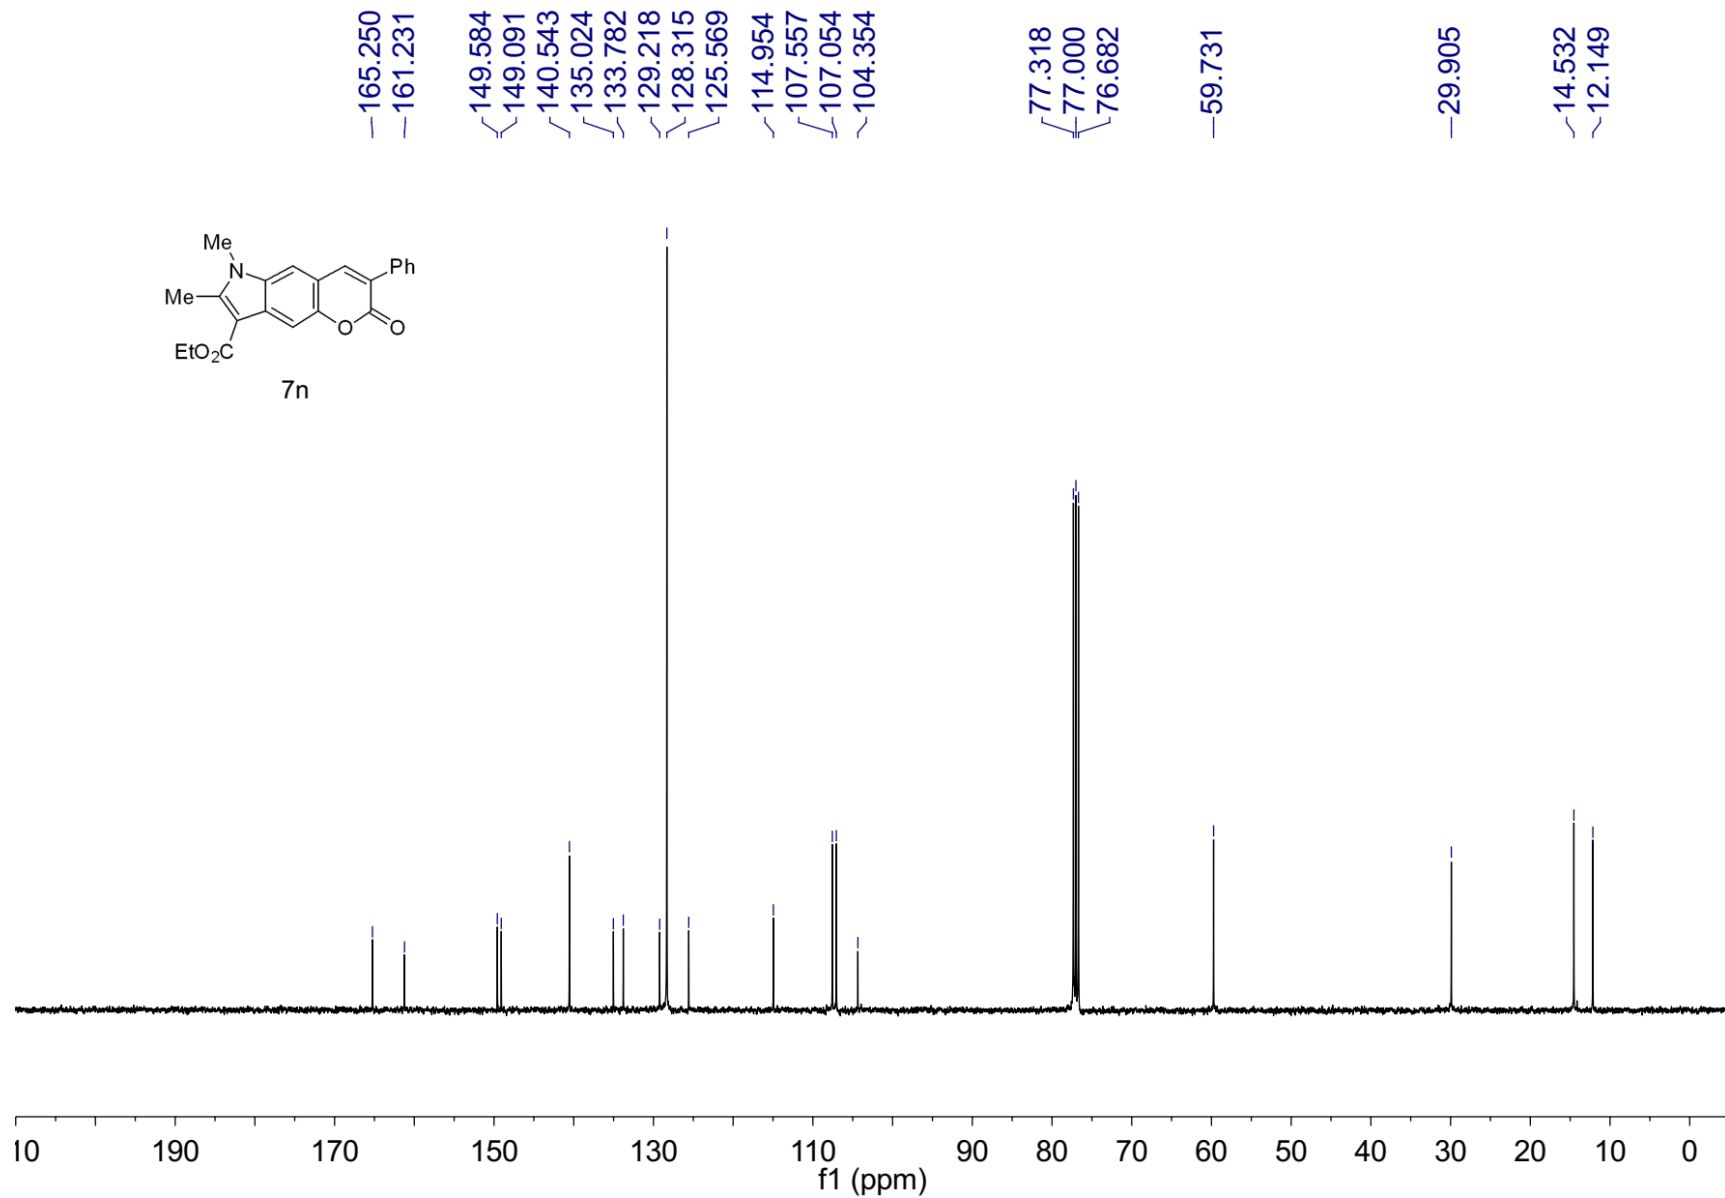



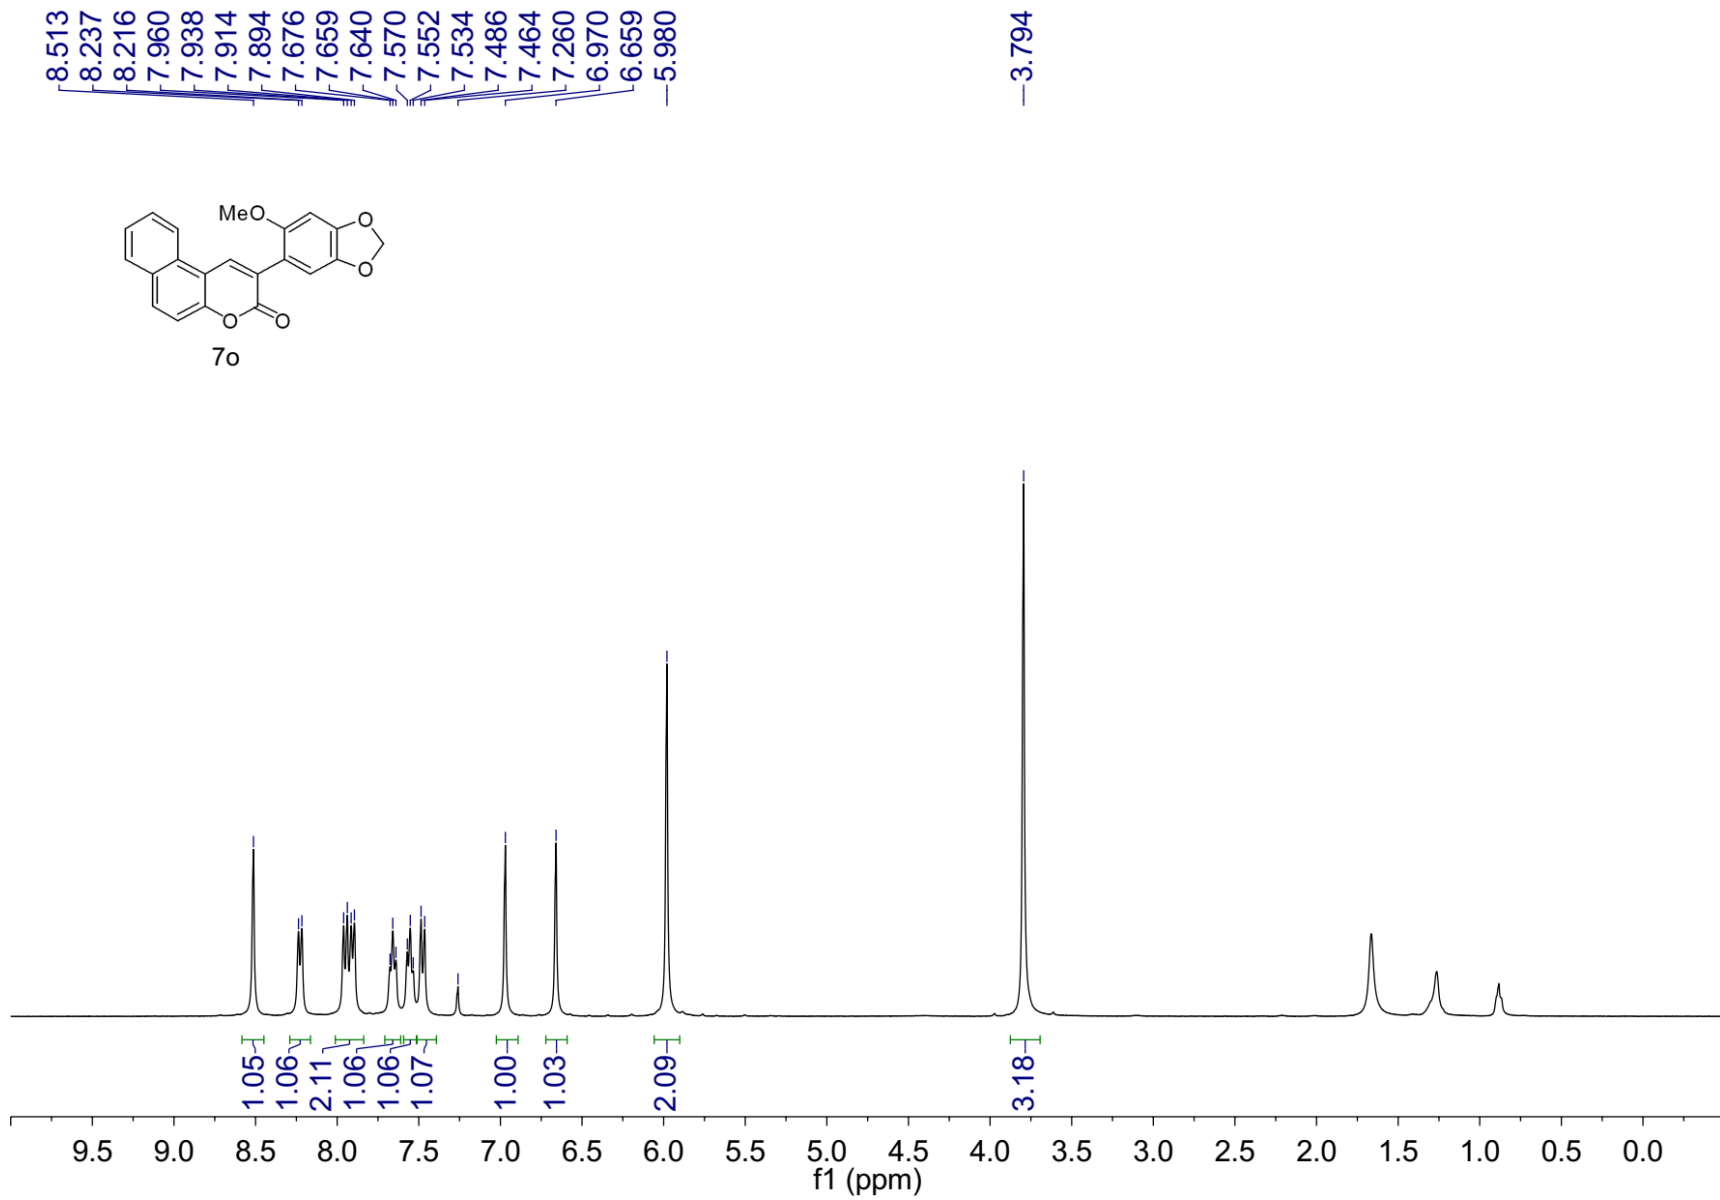

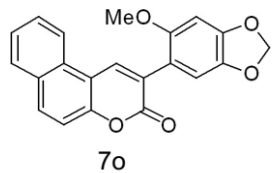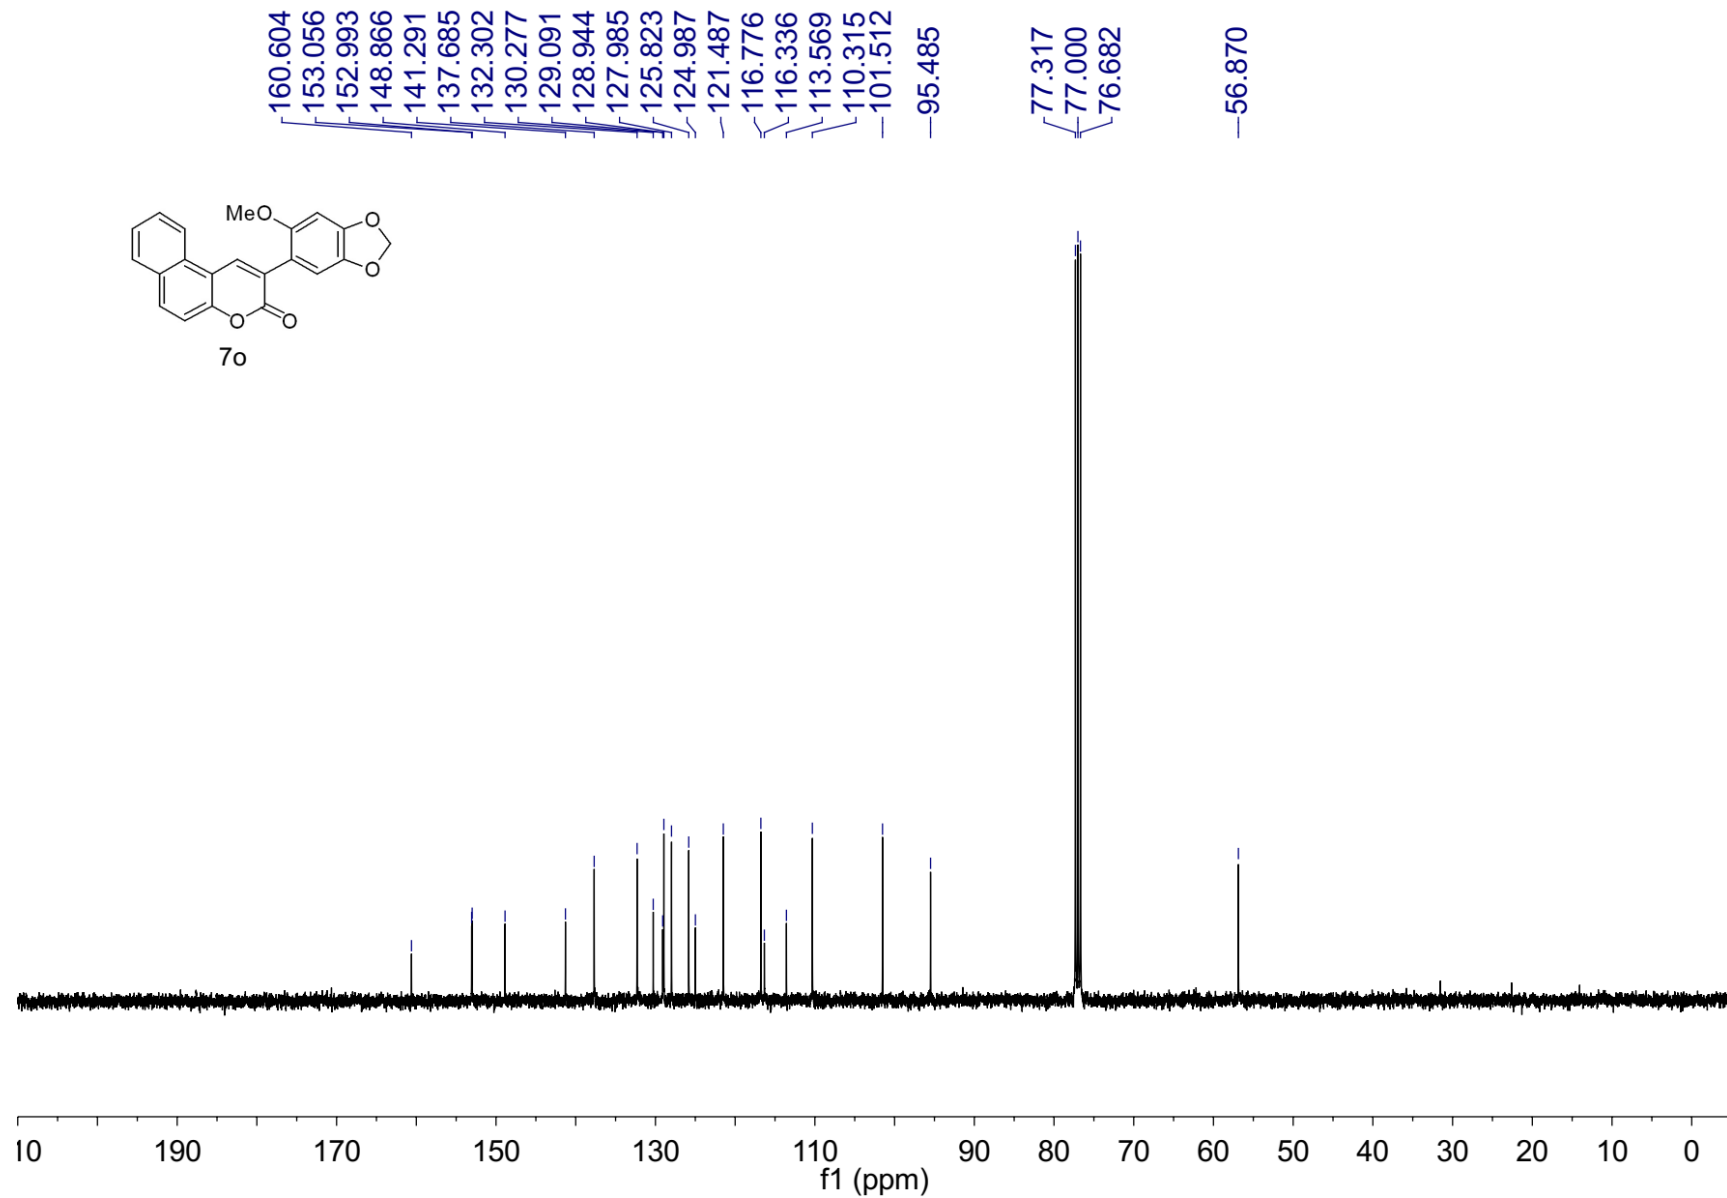

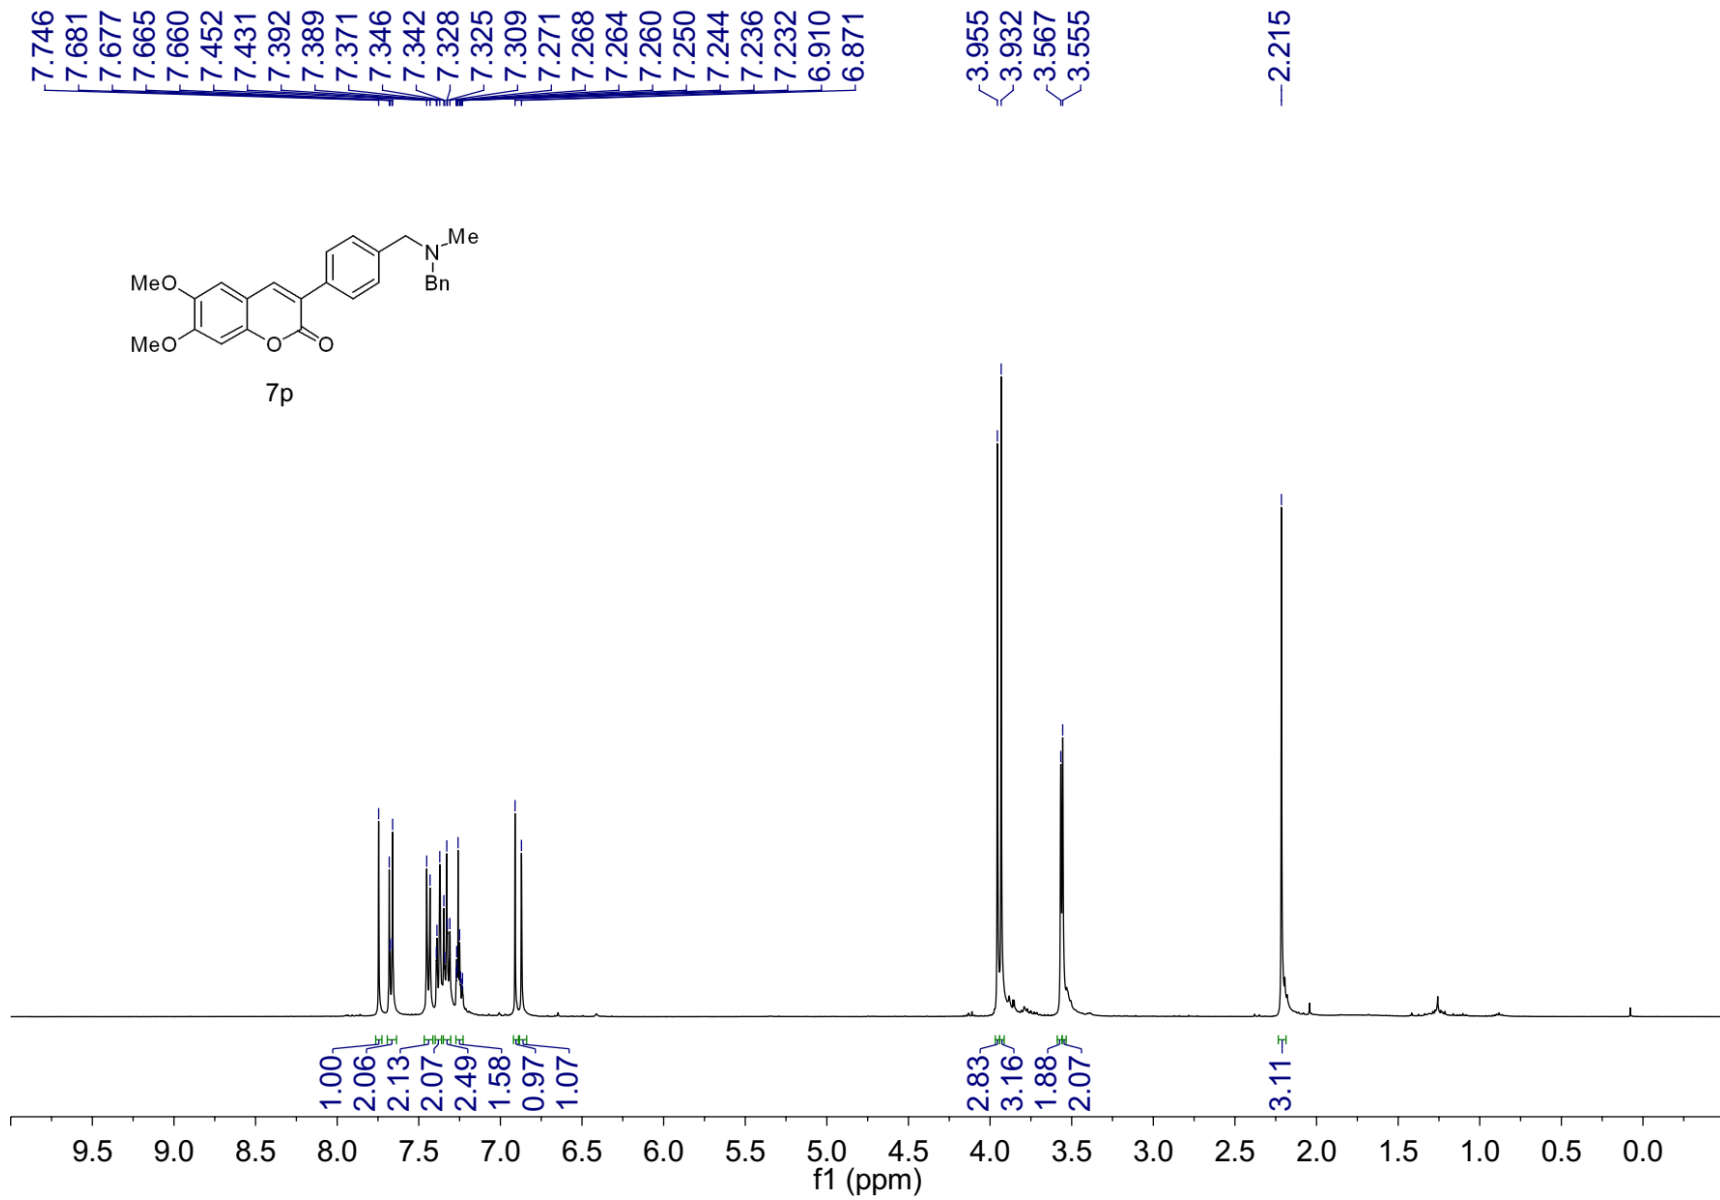

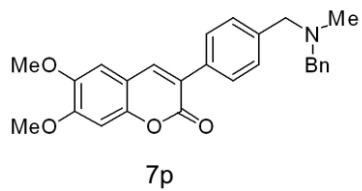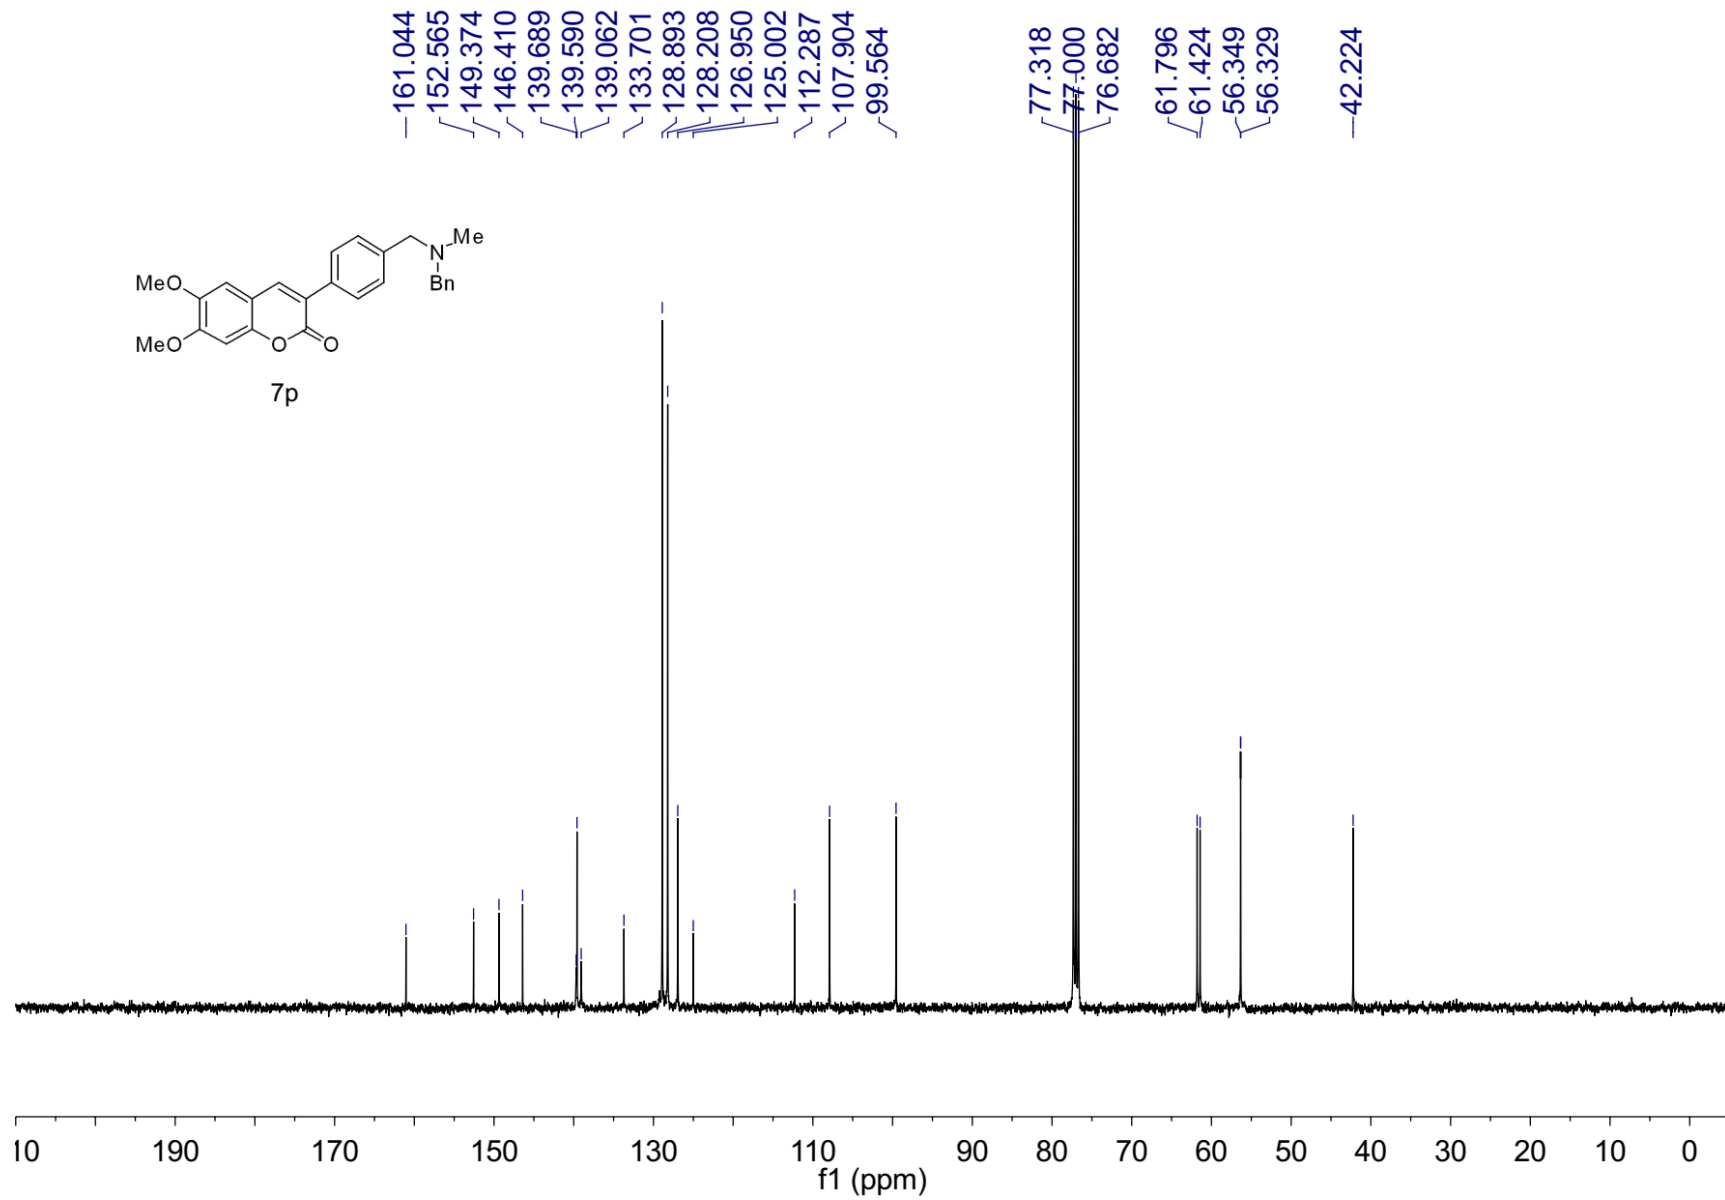

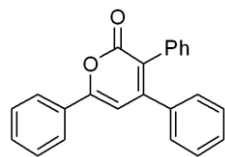

10

7.941  
7.498  
7.300  
7.285  
7.254  
7.211  
6.872

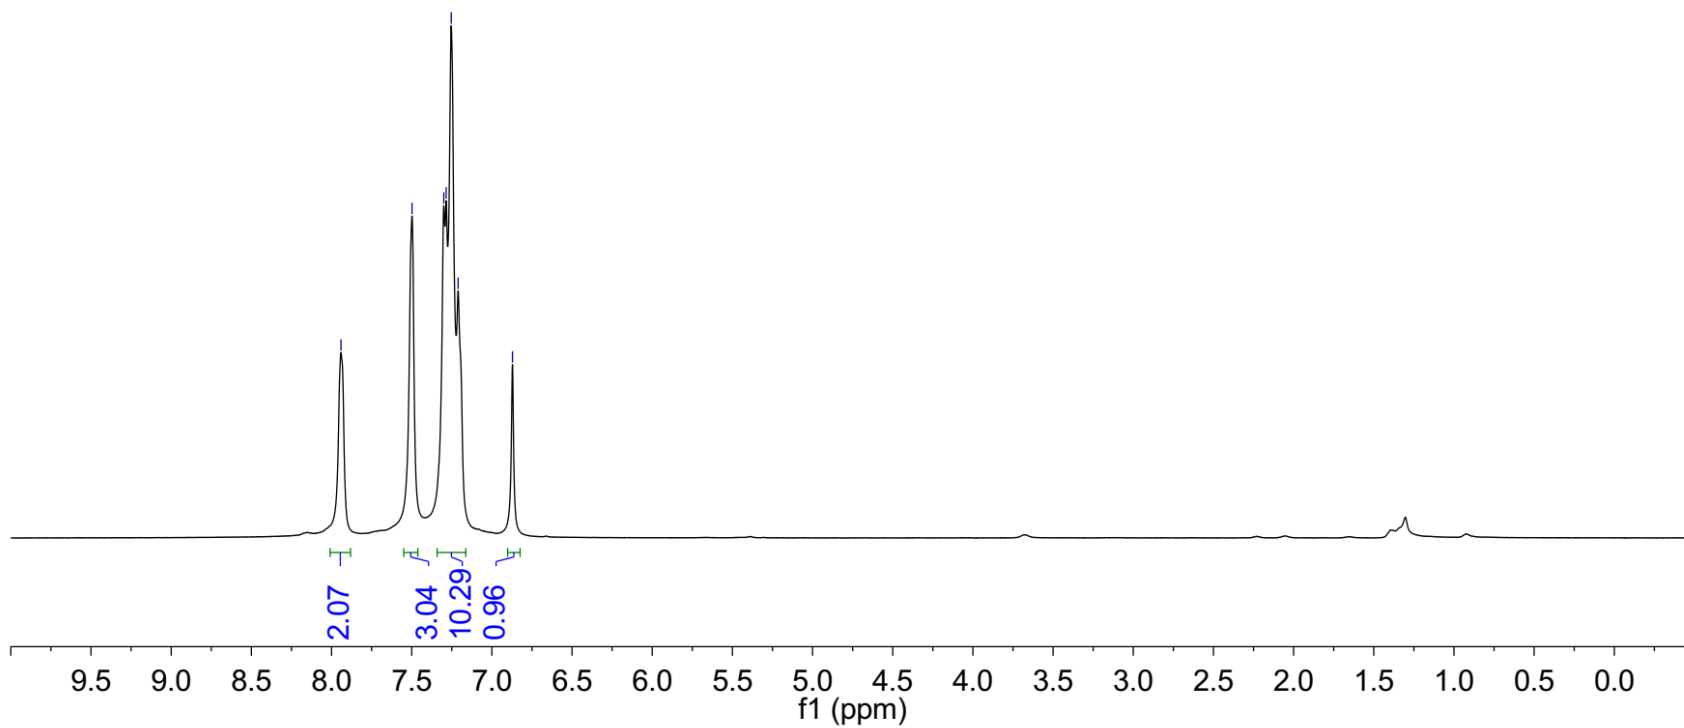

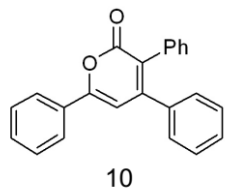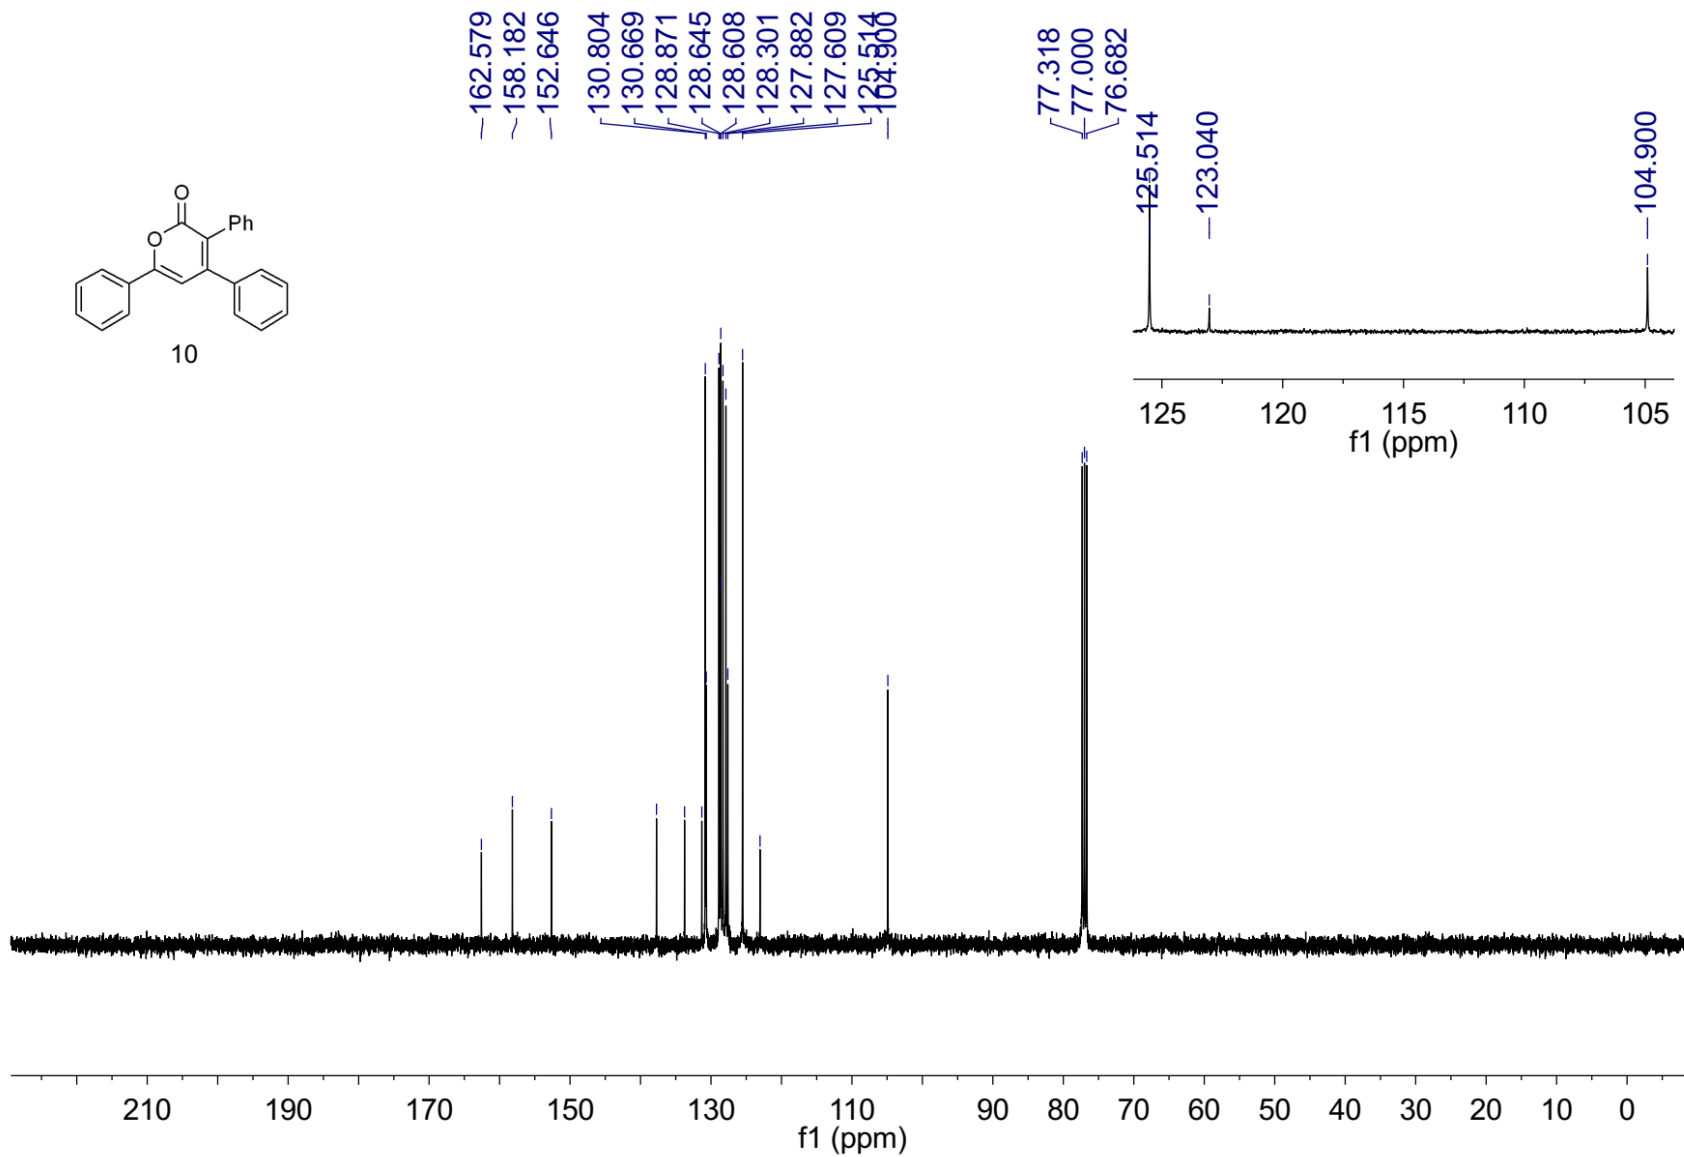

Supplement: d3qo00567d1.pdf [file d3qo00567d1.pdf]
